# Supplementary material for: Human alveolar macrophage response to Mycobacterium tuberculosis: immune characteristics underlying large inter-individual variability
Source: Research Square preprint supplement (doi:10.21203/rs.3.rs-2986649/v1), 2023-06-08
Supplement: Supplementary file 1 [file 2751293b2a272112f33d9d4e.pdf]

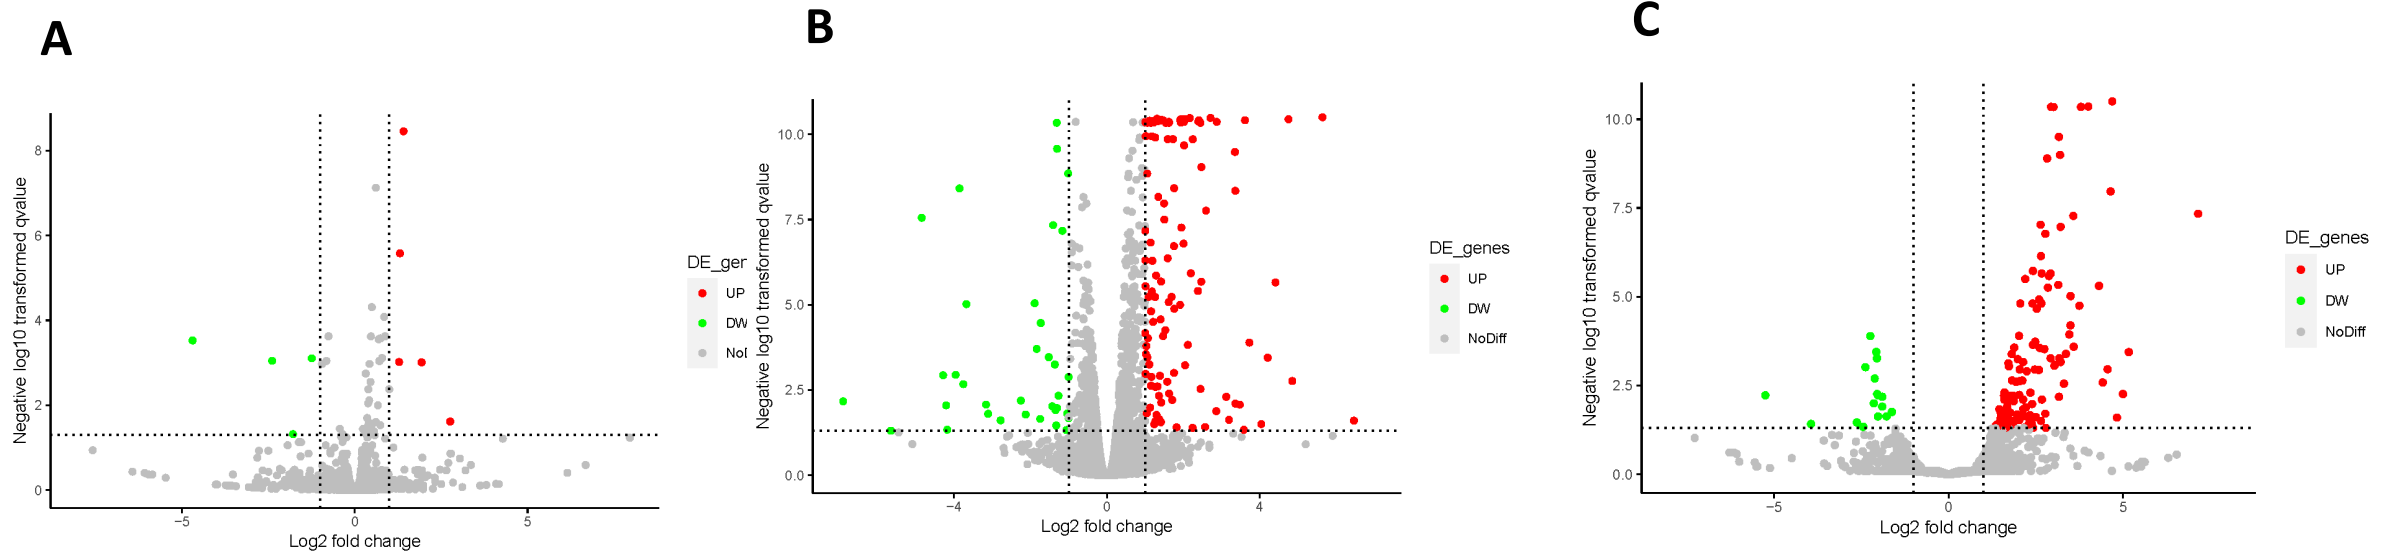

**Additional file 14: Supplementary Fig. 4. Volcano plot showing the significantly upregulated (red) and downregulated (green) genes with >2-fold changes at 2h (A), 24h (B) and 72h (C) in the South Africa cohort samples.**
