# Supplementary material for: Human alveolar macrophage response to Mycobacterium tuberculosis: immune characteristics underlying large inter-individual variability
Source: Research Square preprint supplement (doi:10.21203/rs.3.rs-2986649/v1), 2023-06-08
Supplement: Supplementary file 2 [file 33a3fc933afc1f68d7890bbc.pdf]

**Additional file 12: Table S9. Correlations between protein levels and gene modules in control and infected AMs at 2, 24 and 72h.** Shown are correlations (*r*, upper panels) and Adjusted *p* values (lower panels). Significant correlations are highlighted. A few strong correlations occur in the uninfected cells (for example at 2h: CCL3 with the Royalblue module (*r*=0.80, *p*=7.9e-7), CXCL5 with the Purple module (*r*=0.72, *p*=3.7e-5), and IL6 with the Royalblue module (*r*=0.70, *p*=6.6e-6). Positive correlations are highlighted in red, negative in blue (most in the infected AM correlations). Adjusted *p* values reflect the number of proteins (*n*=27).

**Table S9A. Protein levels with gene modules correlations, 2h control**  
Control, 2h protein vs. module correlation

|                 | CCL13 | CCL17 | CCL19 | CCL2  | CCL20 | CCL22 | CCL3  | CCL4  | CSF2  | CXCL10 | CXCL5 | IL10  | IL15  | IL16  | IL18  | IL1A  | IL1B  | IL6   | IL7   | IL8   | MMP1  | MMP10 | MMP2  | MMP3  | MMP9  | TNF   | VEGFA |
|-----------------|-------|-------|-------|-------|-------|-------|-------|-------|-------|--------|-------|-------|-------|-------|-------|-------|-------|-------|-------|-------|-------|-------|-------|-------|-------|-------|-------|
| MEblack         | -0.06 | -0.10 | 0.09  | -0.20 | -0.21 | -0.04 | -0.12 | -0.20 | -0.27 | -0.28  | -0.10 | 0.04  | -0.05 | -0.15 | -0.47 | -0.38 | -0.08 | -0.25 | 0.22  | 0.03  | 0.08  | -0.21 | 0.14  | 0.34  | 0.26  | -0.29 | -0.02 |
| MEblue          | -0.02 | 0.05  | 0.22  | -0.06 | -0.43 | 0.08  | -0.19 | -0.20 | -0.31 | -0.30  | -0.13 | -0.12 | -0.13 | 0.11  | -0.51 | -0.27 | -0.21 | -0.43 | -0.01 | -0.16 | -0.01 | -0.19 | -0.06 | -0.02 | -0.19 | -0.38 | -0.20 |
| MEbrown         | -0.28 | 0.27  | 0.24  | 0.32  | 0.21  | 0.13  | 0.22  | 0.35  | 0.11  | 0.31   | 0.27  | -0.68 | 0.24  | 0.10  | 0.29  | 0.22  | -0.55 | -0.17 | -0.26 | -0.18 | -0.02 | 0.19  | -0.37 | -0.23 | -0.47 | -0.01 | -0.33 |
| MEcyan          | -0.01 | -0.29 | -0.05 | -0.19 | 0.45  | -0.16 | 0.17  | 0.13  | 0.18  | 0.15   | 0.23  | 0.28  | -0.07 | -0.37 | 0.19  | -0.05 | 0.20  | 0.38  | 0.27  | 0.32  | 0.07  | 0.09  | 0.19  | 0.36  | 0.31  | 0.25  | 0.23  |
| MEdarkgreen     | -0.27 | 0.27  | 0.24  | 0.34  | 0.05  | 0.15  | 0.17  | 0.32  | 0.09  | 0.27   | 0.26  | -0.66 | 0.12  | 0.24  | 0.28  | 0.22  | -0.56 | -0.19 | -0.30 | -0.16 | -0.08 | 0.19  | -0.41 | -0.26 | -0.59 | 0.06  | -0.39 |
| MEdarkgrey      | -0.42 | 0.07  | 0.36  | 0.14  | 0.26  | 0.03  | 0.28  | 0.34  | 0.00  | 0.23   | 0.36  | -0.69 | 0.21  | -0.14 | -0.08 | -0.11 | -0.67 | -0.29 | 0.02  | 0.02  | 0.17  | 0.08  | -0.22 | 0.30  | -0.10 | -0.11 | -0.30 |
| MEdarkorange    | 0.01  | -0.13 | -0.40 | -0.17 | -0.23 | -0.18 | -0.29 | -0.39 | -0.10 | -0.21  | -0.62 | 0.43  | 0.08  | 0.13  | 0.33  | -0.03 | 0.40  | 0.02  | 0.05  | 0.01  | -0.10 | -0.04 | 0.09  | 0.09  | 0.25  | 0.02  | 0.05  |
| MEdarkred       | -0.03 | 0.23  | 0.51  | 0.32  | 0.22  | 0.33  | 0.32  | 0.43  | 0.11  | 0.34   | 0.40  | -0.64 | 0.03  | 0.13  | -0.15 | -0.12 | -0.51 | -0.23 | -0.16 | 0.06  | 0.33  | 0.15  | -0.31 | -0.07 | -0.23 | -0.06 | -0.18 |
| MEdarkturquoise | 0.18  | -0.19 | 0.01  | -0.30 | -0.41 | -0.12 | -0.25 | -0.47 | -0.22 | -0.45  | -0.67 | 0.44  | -0.09 | 0.16  | 0.08  | -0.18 | 0.40  | -0.04 | -0.03 | -0.10 | -0.25 | -0.05 | 0.04  | -0.05 | -0.05 | -0.14 | -0.12 |
| MEgreen         | 0.28  | 0.07  | -0.16 | -0.07 | -0.60 | 0.08  | -0.34 | -0.42 | -0.28 | -0.39  | -0.50 | 0.38  | -0.10 | 0.28  | -0.23 | -0.11 | 0.31  | -0.19 | -0.01 | -0.13 | -0.13 | -0.26 | 0.09  | -0.13 | 0.05  | -0.26 | 0.00  |
| MEgreenyellow   | 0.27  | -0.01 | -0.24 | -0.07 | -0.16 | 0.02  | -0.10 | -0.24 | -0.10 | -0.13  | -0.31 | 0.42  | 0.13  | 0.03  | -0.05 | -0.03 | 0.41  | 0.13  | 0.15  | 0.14  | 0.02  | -0.19 | 0.28  | 0.14  | 0.46  | -0.06 | 0.24  |
| MEgrey          | -0.23 | -0.07 | 0.01  | -0.14 | -0.05 | -0.08 | -0.08 | -0.10 | -0.19 | -0.10  | 0.01  | -0.20 | 0.17  | -0.26 | -0.50 | -0.33 | -0.26 | -0.27 | 0.24  | -0.06 | 0.18  | -0.12 | 0.17  | 0.32  | 0.38  | -0.25 | 0.09  |
| MEgrey60        | 0.26  | -0.22 | -0.08 | -0.18 | 0.24  | -0.07 | -0.03 | 0.01  | 0.13  | 0.01   | 0.24  | 0.54  | -0.28 | -0.28 | -0.10 | 0.02  | 0.41  | 0.42  | 0.23  | 0.26  | -0.06 | -0.01 | 0.33  | 0.04  | 0.19  | 0.23  | 0.43  |
| MElightcyan     | 0.46  | -0.05 | -0.25 | -0.06 | -0.13 | 0.02  | -0.08 | -0.18 | 0.13  | -0.07  | -0.24 | 0.61  | -0.12 | 0.09  | 0.03  | 0.12  | 0.62  | 0.35  | 0.09  | 0.16  | -0.01 | -0.05 | 0.29  | -0.05 | 0.37  | 0.23  | 0.37  |
| MElightgreen    | -0.03 | -0.07 | 0.25  | -0.15 | -0.29 | -0.02 | -0.16 | -0.20 | -0.20 | -0.33  | -0.23 | 0.06  | -0.16 | 0.09  | -0.04 | -0.20 | -0.04 | -0.23 | -0.04 | -0.08 | -0.21 | -0.10 | -0.18 | 0.02  | -0.38 | -0.22 | -0.34 |
| MElightyellow   | 0.15  | 0.05  | 0.33  | 0.14  | -0.12 | 0.15  | 0.18  | 0.20  | 0.10  | 0.10   | 0.18  | -0.18 | -0.26 | 0.28  | -0.20 | 0.10  | -0.12 | -0.06 | -0.16 | 0.05  | 0.10  | 0.03  | -0.21 | -0.12 | -0.29 | 0.13  | -0.14 |
| MEmagenta       | -0.11 | -0.08 | 0.35  | -0.09 | 0.09  | 0.04  | 0.12  | 0.12  | -0.11 | -0.05  | 0.29  | -0.19 | -0.15 | -0.20 | -0.32 | -0.25 | -0.29 | -0.17 | 0.09  | 0.10  | 0.07  | -0.07 | -0.06 | 0.22  | -0.11 | -0.18 | -0.15 |
| MEmidnightblue  | 0.56  | 0.22  | 0.09  | 0.34  | 0.56  | 0.38  | 0.61  | 0.56  | 0.54  | 0.54   | 0.35  | 0.21  | -0.03 | 0.15  | 0.49  | 0.51  | 0.32  | 0.62  | -0.09 | 0.49  | 0.01  | 0.09  | -0.15 | -0.11 | 0.05  | 0.32  | 0.10  |
| MEorange        | 0.50  | 0.36  | 0.00  | 0.18  | 0.03  | 0.45  | 0.28  | 0.16  | 0.27  | 0.08   | 0.06  | 0.09  | 0.09  | 0.12  | 0.01  | 0.35  | 0.17  | 0.21  | -0.15 | 0.01  | 0.12  | 0.04  | -0.08 | -0.32 | -0.11 | -0.06 | -0.04 |
| MEpink          | 0.12  | -0.28 | 0.02  | -0.29 | 0.13  | -0.10 | -0.03 | -0.08 | -0.03 | -0.12  | 0.17  | 0.38  | -0.23 | -0.37 | -0.36 | -0.26 | 0.23  | 0.18  | 0.35  | 0.25  | 0.08  | -0.09 | 0.35  | 0.31  | 0.34  | 0.03  | 0.31  |
| MEpurple        | -0.07 | -0.09 | 0.36  | 0.11  | 0.51  | 0.08  | 0.38  | 0.51  | 0.25  | 0.41   | 0.72  | -0.25 | -0.18 | -0.14 | -0.05 | 0.06  | -0.29 | 0.23  | 0.06  | 0.37  | 0.10  | 0.19  | -0.07 | 0.16  | -0.12 | 0.31  | 0.07  |
| MERed           | -0.39 | 0.09  | 0.01  | 0.16  | 0.34  | -0.08 | 0.19  | 0.25  | 0.12  | 0.29   | 0.15  | -0.52 | 0.33  | -0.09 | 0.38  | 0.13  | -0.39 | -0.03 | -0.11 | -0.10 | 0.05  | 0.21  | -0.17 | 0.02  | -0.07 | 0.09  | -0.15 |
| MEroyalblue     | 0.60  | 0.04  | 0.34  | 0.31  | 0.68  | 0.36  | 0.80  | 0.69  | 0.66  | 0.61   | 0.58  | 0.18  | -0.14 | 0.22  | 0.42  | 0.53  | 0.32  | 0.76  | -0.15 | 0.64  | -0.03 | 0.27  | -0.17 | -0.07 | 0.04  | 0.57  | 0.11  |
| MEsalmon        | -0.05 | -0.10 | 0.20  | 0.12  | 0.64  | 0.04  | 0.35  | 0.49  | 0.32  | 0.48   | 0.67  | -0.11 | -0.05 | -0.17 | 0.16  | 0.18  | -0.13 | 0.41  | 0.06  | 0.39  | 0.02  | 0.27  | 0.03  | 0.06  | -0.03 | 0.42  | 0.23  |
| MEskyblue       | -0.09 | 0.09  | 0.45  | 0.18  | 0.13  | 0.11  | 0.22  | 0.35  | 0.17  | 0.24   | 0.43  | -0.47 | -0.12 | 0.07  | -0.16 | 0.09  | -0.43 | -0.12 | -0.15 | 0.00  | 0.09  | 0.10  | -0.30 | -0.13 | -0.48 | 0.10  | -0.21 |
| MEtan           | 0.21  | -0.30 | -0.36 | -0.19 | 0.24  | -0.17 | 0.02  | -0.07 | 0.21  | 0.08   | -0.03 | 0.59  | -0.17 | -0.15 | 0.26  | 0.07  | 0.57  | 0.53  | 0.22  | 0.33  | 0.05  | 0.13  | 0.35  | 0.20  | 0.49  | 0.43  | 0.43  |
| MEturquoise     | -0.07 | -0.19 | -0.39 | -0.10 | 0.24  | -0.21 | -0.04 | -0.07 | 0.13  | 0.13   | -0.12 | 0.26  | 0.12  | -0.10 | 0.32  | 0.07  | 0.29  | 0.31  | 0.13  | 0.18  | 0.05  | 0.13  | 0.22  | 0.18  | 0.46  | 0.29  | 0.32  |
| MEwhite         | 0.54  | 0.34  | 0.13  | 0.38  | -0.16 | 0.46  | 0.22  | 0.20  | 0.09  | 0.16   | -0.04 | 0.18  | -0.08 | 0.47  | 0.16  | 0.30  | 0.21  | 0.16  | -0.23 | 0.17  | -0.13 | 0.07  | -0.14 | -0.30 | -0.12 | 0.12  | 0.00  |
| MEyellow        | 0.49  | -0.11 | -0.17 | -0.13 | -0.30 | 0.02  | -0.20 | -0.27 | -0.01 | -0.23  | -0.26 | 0.69  | -0.34 | 0.17  | -0.12 | 0.04  | 0.63  | 0.24  | 0.04  | 0.12  | -0.08 | -0.14 | 0.23  | -0.16 | 0.11  | 0.13  | 0.28  |

Control, 2h protein vs. module correlation *p* value

|                 | CCL13 | CCL17 | CCL19 | CCL2 | CCL20 | CCL22 | CCL3 | CCL4 | CSF2 | CXCL10 | CXCL5 | IL10 | IL15 | IL16 | IL18 | IL1A | IL1B   | IL6  | IL7  | IL8  | MMP1 | MMP10 | MMP2 | MMP3 | MMP9 | TNF  | VEGFA |
|-----------------|-------|-------|-------|------|-------|-------|------|------|------|--------|-------|------|------|------|------|------|--------|------|------|------|------|-------|------|------|------|------|-------|
| MEblack         | 0.77  | 0.61  | 0.68  | 0.32 | 0.29  | 0.84  | 0.57 | 0.33 | 0.19 | 0.17   | 0.63  | 0.83 | 0.82 | 0.45 | 0.02 | 0.06 | 0.71   | 0.21 | 0.28 | 0.89 | 0.68 | 0.31  | 0.48 | 0.09 | 0.20 | 0.15 | 0.91  |
| MEblue          | 0.92  | 0.80  | 0.29  | 0.75 | 0.03  | 0.70  | 0.34 | 0.34 | 0.12 | 0.14   | 0.53  | 0.57 | 0.54 | 0.60 | 0.01 | 0.19 | 0.29   | 0.03 | 0.94 | 0.43 | 0.96 | 0.34  | 0.75 | 0.90 | 0.35 | 0.06 | 0.33  |
| MEbrown         | 0.17  | 0.19  | 0.23  | 0.11 | 0.31  | 0.52  | 0.28 | 0.08 | 0.58 | 0.12   | 0.19  | 0.00 | 0.23 | 0.61 | 0.15 | 0.29 | 0.00   | 0.42 | 0.20 | 0.37 | 0.93 | 0.36  | 0.06 | 0.26 | 0.01 | 0.97 | 0.10  |
| MEcyan          | 0.94  | 0.15  | 0.80  | 0.36 | 0.02  | 0.43  | 0.39 | 0.51 | 0.38 | 0.47   | 0.27  | 0.17 | 0.72 | 0.07 | 0.36 | 0.81 | 0.32   | 0.06 | 0.18 | 0.11 | 0.74 | 0.66  | 0.37 | 0.07 | 0.13 | 0.22 | 0.25  |
| MEdarkgreen     | 0.18  | 0.17  | 0.24  | 0.09 | 0.80  | 0.47  | 0.39 | 0.12 | 0.66 | 0.18   | 0.20  | 0.00 | 0.56 | 0.25 | 0.16 | 0.29 | 0.00   | 0.36 | 0.14 | 0.44 | 0.70 | 0.36  | 0.04 | 0.21 | 0.00 | 0.76 | 0.05  |
| MEdarkgrey      | 0.03  | 0.72  | 0.07  | 0.50 | 0.19  | 0.89  | 0.17 | 0.09 | 0.99 | 0.25   | 0.07  | 0.00 | 0.30 | 0.50 | 0.70 | 0.60 | 0.00   | 0.16 | 0.90 | 0.91 | 0.41 | 0.69  | 0.29 | 0.14 | 0.62 | 0.58 | 0.14  |
| MEdarkorange    | 0.97  | 0.54  | 0.04  | 0.40 | 0.26  | 0.39  | 0.15 | 0.05 | 0.62 | 0.29   | 0.00  | 0.03 | 0.69 | 0.52 | 0.10 | 0.87 | 0.04   | 0.91 | 0.82 | 0.96 | 0.61 | 0.83  | 0.66 | 0.67 | 0.21 | 0.94 | 0.82  |
| MEdarkred       | 0.87  | 0.26  | 0.01  | 0.11 | 0.29  | 0.10  | 0.11 | 0.03 | 0.61 | 0.09   | 0.05  | 0.00 | 0.88 | 0.52 | 0.46 | 0.57 | 0.01   | 0.25 | 0.44 | 0.76 | 0.10 | 0.45  | 0.13 | 0.75 | 0.26 | 0.76 | 0.37  |
| MEdarkturquoise | 0.37  | 0.36  | 0.96  | 0.14 | 0.04  | 0.55  | 0.23 | 0.02 | 0.27 | 0.02   | 0.00  | 0.03 | 0.66 | 0.43 | 0.68 | 0.39 | 0.04   | 0.84 | 0.89 | 0.64 | 0.22 | 0.82  | 0.86 | 0.80 | 0.82 | 0.50 | 0.54  |
| MEgreen         | 0.17  | 0.73  | 0.45  | 0.73 | 0.00  | 0.71  | 0.09 | 0.03 | 0.17 | 0.05   | 0.01  | 0.06 | 0.62 | 0.17 | 0.25 | 0.58 | 0.13   | 0.36 | 0.97 | 0.54 | 0.52 | 0.21  | 0.65 | 0.52 | 0.80 | 0.21 | 0.99  |
| MEgreenyellow   | 0.18  | 0.95  | 0.24  | 0.72 | 0.45  | 0.92  | 0.63 | 0.24 | 0.63 | 0.52   | 0.13  | 0.03 | 0.53 | 0.87 | 0.80 | 0.87 | 0.04   | 0.51 | 0.46 | 0.50 | 0.92 | 0.35  | 0.16 | 0.50 | 0.02 | 0.77 | 0.24  |
| MEgrey          | 0.25  | 0.74  | 0.97  | 0.48 | 0.79  | 0.69  | 0.69 | 0.62 | 0.34 | 0.63   | 0.97  | 0.32 | 0.41 | 0.21 | 0.01 | 0.10 | 0.20   | 0.19 | 0.23 | 0.76 | 0.37 | 0.57  | 0.40 | 0.11 | 0.06 | 0.21 | 0.68  |
| MEgrey60        | 0.19  | 0.27  | 0.69  | 0.38 | 0.25  | 0.73  | 0.89 | 0.97 | 0.54 | 0.97   | 0.24  | 0.00 | 0.17 | 0.16 | 0.61 | 0.91 | 0.04   | 0.03 | 0.25 | 0.20 | 0.78 | 0.97  | 0.10 | 0.85 | 0.35 | 0.27 | 0.03  |
| MElightcyan     | 0.02  | 0.80  | 0.22  | 0.78 | 0.53  | 0.94  | 0.71 | 0.37 | 0.53 | 0.73   | 0.25  | 0.00 | 0.56 | 0.65 | 0.88 | 0.55 | 0.00   | 0.08 | 0.66 | 0.42 | 0.97 | 0.79  | 0.15 | 0.81 | 0.06 | 0.26 | 0.06  |
| MElightgreen    | 0.90  | 0.73  | 0.22  | 0.45 | 0.15  | 0.92  | 0.45 | 0.32 | 0.32 | 0.10   | 0.26  | 0.76 | 0.43 | 0.68 | 0.86 | 0.33 | 0.86   | 0.25 | 0.86 | 0.69 | 0.30 | 0.64  | 0.38 | 0.93 | 0.06 | 0.29 | 0.09  |
| MElightyellow   | 0.46  | 0.82  | 0.10  | 0.51 | 0.56  | 0.47  | 0.37 | 0.34 | 0.62 | 0.61   | 0.38  | 0.39 | 0.20 | 0.17 | 0.32 | 0.62 | 0.57</ |      |      |      |      |       |      |      |      |      |       |

**Additional file 12: Table S9B. Protein levels with gene modules correlations, 2h infected**  
**Infected, 2h protein vs. module correlation**

|                 | GT2   | CCL13 | CCL17 | CCL19 | CCL2  | CCL20 | CCL22 | CCL3  | CCL4  | CSF2  | CXCL10 | CXCL5 | IL10  | IL15  | IL16  | IL18  | IL1A  | IL1B  | IL6   | IL7   | IL8   | MMP1  | MMP10 | MMP2  | MMP3  | MMP9  | TNF   | VEGFA |
|-----------------|-------|-------|-------|-------|-------|-------|-------|-------|-------|-------|--------|-------|-------|-------|-------|-------|-------|-------|-------|-------|-------|-------|-------|-------|-------|-------|-------|-------|
| MEblack         | 0.27  | 0.16  | 0.02  | 0.22  | -0.10 | 0.17  | 0.07  | 0.21  | 0.08  | -0.19 | -0.11  | 0.18  | 0.07  | 0.04  | -0.18 | -0.20 | -0.17 | 0.09  | 0.19  | 0.11  | 0.18  | -0.16 | 0.15  | -0.24 | 0.16  | -0.06 | 0.15  | -0.05 |
| MEblue          | 0.13  | 0.06  | 0.28  | 0.26  | 0.11  | 0.05  | 0.16  | 0.19  | 0.19  | -0.12 | -0.11  | 0.25  | -0.04 | 0.00  | -0.07 | -0.28 | -0.11 | -0.10 | 0.10  | -0.02 | 0.03  | -0.32 | 0.11  | -0.12 | 0.01  | -0.24 | 0.10  | -0.05 |
| MEbrown         | -0.30 | -0.31 | 0.30  | 0.10  | 0.41  | -0.06 | -0.19 | -0.04 | 0.20  | 0.25  | 0.22   | 0.02  | -0.56 | -0.06 | 0.25  | 0.03  | 0.19  | -0.58 | -0.47 | -0.22 | -0.33 | 0.04  | -0.15 | -0.07 | -0.07 | -0.10 | 0.20  | -0.17 |
| MEcyan          | 0.30  | -0.01 | -0.50 | -0.10 | -0.33 | 0.15  | -0.11 | -0.06 | -0.17 | -0.05 | 0.10   | 0.04  | 0.24  | 0.06  | -0.30 | 0.16  | -0.05 | 0.21  | 0.16  | 0.18  | 0.29  | 0.30  | 0.15  | -0.13 | 0.14  | 0.29  | 0.03  | 0.18  |
| MEdarkgreen     | -0.28 | -0.20 | 0.37  | 0.21  | 0.47  | 0.28  | -0.11 | 0.25  | 0.42  | 0.27  | 0.31   | 0.42  | -0.46 | -0.12 | 0.21  | 0.14  | 0.21  | -0.46 | -0.16 | -0.40 | -0.12 | -0.18 | 0.16  | -0.11 | -0.11 | -0.20 | -0.10 | -0.08 |
| MEdarkgrey      | -0.03 | -0.22 | 0.20  | 0.35  | 0.31  | 0.21  | -0.25 | 0.20  | 0.33  | 0.13  | 0.25   | 0.22  | -0.58 | 0.00  | 0.10  | -0.09 | 0.08  | -0.54 | -0.32 | -0.11 | -0.04 | 0.11  | -0.01 | -0.45 | 0.12  | -0.14 | -0.07 | -0.23 |
| MEdarkorange    | -0.11 | -0.08 | -0.16 | -0.44 | -0.30 | -0.43 | -0.08 | -0.41 | -0.45 | -0.23 | -0.32  | -0.66 | 0.24  | 0.05  | 0.10  | 0.21  | -0.02 | 0.24  | -0.14 | -0.02 | -0.09 | 0.22  | -0.31 | 0.26  | -0.07 | 0.13  | -0.11 | -0.11 |
| MEdarkred       | -0.27 | 0.19  | 0.29  | 0.79  | 0.35  | 0.30  | 0.14  | 0.43  | 0.46  | 0.19  | 0.35   | 0.30  | -0.60 | -0.05 | 0.14  | -0.18 | 0.20  | -0.47 | -0.08 | -0.20 | 0.09  | 0.28  | 0.15  | -0.21 | 0.21  | -0.35 | 0.13  | -0.17 |
| MEdarkturquoise | -0.03 | 0.08  | -0.10 | -0.17 | -0.40 | -0.48 | -0.04 | -0.26 | -0.45 | -0.38 | -0.53  | -0.61 | 0.25  | 0.02  | -0.10 | -0.07 | -0.12 | 0.18  | -0.02 | 0.01  | -0.04 | -0.09 | -0.07 | 0.34  | 0.04  | 0.00  | -0.10 | -0.19 |
| MEgreen         | 0.06  | 0.18  | 0.24  | 0.01  | 0.01  | -0.06 | 0.29  | 0.14  | 0.04  | -0.14 | -0.25  | -0.04 | 0.31  | 0.03  | 0.06  | -0.04 | -0.07 | 0.32  | 0.27  | 0.02  | 0.07  | -0.31 | 0.03  | 0.18  | -0.05 | -0.13 | 0.14  | -0.04 |
| MEgreenyellow   | 0.12  | 0.03  | -0.05 | -0.22 | -0.12 | -0.15 | 0.10  | -0.05 | -0.16 | -0.06 | -0.16  | -0.32 | 0.43  | 0.18  | 0.14  | 0.10  | -0.09 | 0.53  | 0.18  | 0.35  | 0.11  | 0.04  | -0.18 | 0.09  | 0.06  | 0.19  | 0.07  | 0.05  |
| MEgrey          | -0.08 | -0.15 | 0.05  | -0.08 | -0.06 | -0.51 | -0.14 | -0.36 | -0.25 | -0.14 | -0.24  | -0.55 | -0.30 | -0.07 | 0.14  | -0.29 | -0.07 | -0.31 | -0.48 | 0.07  | -0.37 | 0.14  | -0.48 | 0.02  | -0.05 | -0.16 | -0.16 | -0.26 |
| MEgrey60        | 0.45  | 0.14  | -0.31 | -0.07 | -0.20 | 0.27  | 0.18  | 0.12  | 0.01  | 0.02  | 0.10   | 0.41  | 0.44  | 0.12  | -0.37 | 0.01  | -0.07 | 0.35  | 0.46  | 0.26  | 0.37  | -0.10 | 0.34  | -0.10 | 0.03  | 0.22  | 0.18  | 0.41  |
| MElightcyan     | -0.02 | 0.40  | -0.10 | -0.21 | -0.12 | 0.10  | 0.36  | 0.15  | -0.06 | 0.10  | -0.07  | -0.15 | 0.65  | 0.07  | 0.17  | 0.34  | 0.12  | 0.79  | 0.54  | 0.16  | 0.24  | 0.01  | 0.09  | 0.43  | -0.09 | 0.19  | 0.26  | 0.16  |
| MElightgreen    | 0.10  | 0.08  | 0.07  | 0.11  | -0.12 | -0.07 | 0.00  | 0.06  | -0.04 | -0.22 | -0.26  | 0.00  | -0.01 | -0.04 | -0.15 | -0.10 | -0.03 | -0.11 | 0.02  | -0.17 | 0.07  | -0.24 | 0.14  | 0.04  | -0.01 | -0.18 | -0.04 | -0.18 |
| MElightyellow   | -0.09 | 0.30  | 0.17  | 0.41  | 0.18  | 0.40  | 0.26  | 0.46  | 0.36  | 0.15  | 0.17   | 0.40  | 0.01  | -0.15 | 0.08  | 0.02  | 0.14  | 0.08  | 0.34  | -0.15 | 0.21  | -0.07 | 0.30  | 0.06  | 0.02  | -0.20 | 0.23  | 0.01  |
| MEmagenta       | 0.31  | 0.04  | -0.01 | 0.38  | -0.01 | 0.30  | 0.02  | 0.25  | 0.20  | -0.07 | 0.09   | 0.47  | -0.10 | 0.00  | -0.35 | -0.22 | -0.13 | -0.17 | 0.14  | 0.05  | 0.24  | -0.08 | 0.29  | -0.36 | 0.21  | -0.07 | 0.08  | 0.05  |
| MEmidnightblue  | -0.06 | 0.16  | 0.16  | 0.23  | 0.29  | 0.36  | 0.40  | 0.56  | 0.44  | 0.49  | 0.53   | 0.20  | 0.14  | -0.06 | 0.03  | 0.49  | 0.30  | 0.21  | 0.38  | 0.10  | 0.40  | 0.35  | 0.08  | 0.05  | 0.11  | 0.20  | 0.09  | 0.09  |
| MEorange        | -0.10 | 0.12  | 0.34  | 0.14  | 0.20  | 0.03  | 0.50  | 0.25  | 0.18  | 0.13  | 0.10   | 0.20  | 0.25  | 0.13  | -0.06 | 0.05  | -0.02 | 0.30  | 0.29  | 0.11  | 0.01  | -0.11 | 0.00  | 0.22  | -0.06 | -0.02 | 0.11  | 0.06  |
| MEpink          | 0.46  | 0.17  | -0.29 | 0.12  | -0.26 | 0.28  | 0.08  | 0.16  | 0.01  | -0.13 | 0.01   | 0.35  | 0.27  | 0.09  | -0.40 | -0.14 | -0.16 | 0.23  | 0.36  | 0.23  | 0.36  | -0.06 | 0.31  | -0.26 | 0.16  | 0.09  | 0.18  | 0.22  |
| MEpurple        | 0.27  | 0.09  | -0.06 | 0.36  | 0.17  | 0.58  | 0.07  | 0.44  | 0.43  | 0.22  | 0.45   | 0.74  | -0.10 | -0.05 | -0.20 | 0.02  | 0.06  | -0.14 | 0.30  | -0.01 | 0.40  | 0.01  | 0.47  | -0.44 | 0.06  | 0.02  | 0.19  | 0.27  |
| MEred           | -0.30 | -0.22 | -0.04 | -0.11 | 0.09  | -0.09 | -0.34 | -0.20 | -0.08 | 0.09  | 0.11   | -0.23 | -0.39 | -0.01 | 0.16  | 0.13  | 0.10  | -0.34 | -0.42 | -0.16 | -0.26 | 0.22  | -0.19 | -0.04 | 0.01  | 0.08  | -0.22 | -0.15 |
| MEroyalblue     | 0.06  | 0.29  | 0.05  | 0.34  | 0.31  | 0.69  | 0.30  | 0.78  | 0.62  | 0.55  | 0.57   | 0.61  | 0.20  | 0.02  | 0.01  | 0.42  | 0.33  | 0.25  | 0.63  | 0.12  | 0.60  | 0.10  | 0.49  | 0.01  | 0.03  | 0.26  | 0.24  | 0.23  |
| MEsalmon        | 0.34  | -0.13 | -0.14 | 0.05  | 0.19  | 0.38  | 0.00  | 0.21  | 0.33  | 0.35  | 0.50   | 0.57  | -0.06 | 0.08  | -0.08 | 0.11  | 0.17  | -0.16 | 0.17  | 0.15  | 0.32  | 0.07  | 0.32  | -0.42 | -0.11 | 0.22  | 0.09  | 0.42  |
| MEskyblue       | -0.07 | 0.10  | 0.22  | 0.47  | 0.28  | 0.30  | 0.12  | 0.36  | 0.39  | 0.19  | 0.25   | 0.51  | -0.29 | -0.08 | -0.05 | -0.16 | 0.10  | -0.31 | 0.06  | -0.19 | 0.08  | -0.07 | 0.25  | -0.11 | 0.03  | -0.26 | 0.07  | 0.05  |
| MEtan           | 0.16  | 0.33  | -0.43 | -0.17 | -0.35 | -0.27 | 0.11  | 0.12  | -0.14 | -0.01 | 0.05   | 0.06  | 0.50  | 0.01  | -0.17 | 0.34  | 0.00  | 0.57  | 0.47  | 0.08  | 0.40  | 0.15  | 0.23  | 0.11  | 0.07  | 0.31  | 0.16  | 0.24  |
| MEturquoise     | -0.06 | 0.02  | -0.29 | -0.37 | -0.21 | -0.07 | -0.10 | -0.21 | -0.25 | 0.00  | 0.01   | -0.30 | 0.19  | 0.05  | 0.12  | 0.29  | 0.06  | 0.26  | 0.00  | 0.04  | 0.05  | 0.27  | -0.12 | 0.08  | -0.05 | 0.27  | -0.02 | 0.08  |
| MEwhite         | -0.07 | 0.17  | 0.33  | 0.03  | 0.38  | 0.18  | 0.34  | 0.42  | 0.41  | 0.22  | 0.16   | 0.24  | 0.33  | 0.17  | 0.31  | 0.20  | 0.19  | 0.33  | 0.50  | 0.01  | 0.28  | -0.32 | 0.32  | 0.11  | -0.31 | 0.04  | 0.38  | 0.18  |
| MEyellow        | 0.14  | 0.34  | -0.07 | -0.04 | -0.15 | 0.10  | 0.36  | 0.16  | -0.02 | -0.04 | -0.13  | 0.08  | 0.56  | 0.01  | -0.06 | 0.09  | 0.00  | 0.56  | 0.52  | 0.09  | 0.27  | -0.16 | 0.20  | 0.29  | -0.06 | 0.00  | 0.23  | 0.19  |

**Infected, 2h protein vs. module correlation p value**

|                 | GT2  | CCL13 | CCL17 | CCL19 | CCL2 | CCL20 | CCL22 | CCL3 | CCL4 | CSF2 | CXCL10 | CXCL5 | IL10 | IL15 | IL16 | IL18 | IL1A | IL1B | IL6  | IL7  | IL8  | MMP1 | MMP10 | MMP2 | MMP3 | MMP9 | TNF  | VEGFA |
|-----------------|------|-------|-------|-------|------|-------|-------|------|------|------|--------|-------|------|------|------|------|------|------|------|------|------|------|-------|------|------|------|------|-------|
| MEblack         | 0.18 | 0.44  | 0.92  | 0.28  | 0.61 | 0.42  | 0.75  | 0.29 | 0.70 | 0.35 | 0.58   | 0.38  | 0.75 | 0.84 | 0.39 | 0.33 | 0.42 | 0.67 | 0.34 | 0.60 | 0.37 | 0.43 | 0.46  | 0.24 | 0.42 | 0.78 | 0.47 | 0.81  |
| MEblue          | 0.52 | 0.78  | 0.17  | 0.20  | 0.59 | 0.81  | 0.43  | 0.35 | 0.36 | 0.56 | 0.61   | 0.22  | 0.83 | 0.98 | 0.73 | 0.16 | 0.59 | 0.64 | 0.63 | 0.93 | 0.88 | 0.11 | 0.59  | 0.56 | 0.95 | 0.25 | 0.63 | 0.80  |
| MEbrown         | 0.13 | 0.12  | 0.13  | 0.63  | 0.04 | 0.77  | 0.34  | 0.83 | 0.32 | 0.21 | 0.27   | 0.92  | 0.00 | 0.77 | 0.23 | 0.87 | 0.35 | 0.00 | 0.02 | 0.29 | 0.10 | 0.83 | 0.46  | 0.73 | 0.74 | 0.61 | 0.25 | 0.42  |
| MEcyan          | 0.14 | 0.95  | 0.01  | 0.63  | 0.10 | 0.46  | 0.58  | 0.79 | 0.41 | 0.81 | 0.62   | 0.83  | 0.24 | 0.78 | 0.13 | 0.44 | 0.82 | 0.31 | 0.43 | 0.37 | 0.15 | 0.14 | 0.46  | 0.52 | 0.49 | 0.14 | 0.87 | 0.38  |
| MEdarkgreen     | 0.17 | 0.33  | 0.06  | 0.30  | 0.02 | 0.16  | 0.61  | 0.21 | 0.03 | 0.18 | 0.13   | 0.03  | 0.02 | 0.55 | 0.31 | 0.50 | 0.30 | 0.02 | 0.42 | 0.04 | 0.55 | 0.38 | 0.42  | 0.60 | 0.59 | 0.33 | 0.64 | 0.68  |
| MEdarkgrey      | 0.89 | 0.27  | 0.32  | 0.08  | 0.12 | 0.31  | 0.21  | 0.33 | 0.10 | 0.54 | 0.23   | 0.28  | 0.00 | 0.99 | 0.63 | 0.67 | 0.70 | 0.00 | 0.11 | 0.60 | 0.86 | 0.59 | 0.96  | 0.02 | 0.57 | 0.48 | 0.72 | 0.26  |
| MEdarkorange    | 0.59 | 0.68  | 0.44  | 0.02  | 0.14 | 0.03  | 0.70  | 0.04 | 0.02 | 0.25 | 0.11   | 0.00  | 0.24 | 0.79 | 0.61 | 0.31 | 0.94 | 0.23 | 0.49 | 0.94 | 0.66 | 0.29 | 0.12  | 0.19 | 0.75 | 0.54 | 0.58 | 0.60  |
| MEdarkred       | 0.18 | 0.34  | 0.15  | 0.00  | 0.08 | 0.13  | 0.51  | 0.03 | 0.02 | 0.36 | 0.08   | 0.14  | 0.00 | 0.80 | 0.48 | 0.38 | 0.32 | 0.02 | 0.70 | 0.32 | 0.66 | 0.16 | 0.46  | 0.30 | 0.31 | 0.08 | 0.51 | 0.41  |
| MEdarkturquoise | 0.88 | 0.71  | 0.64  | 0.41  | 0.04 | 0.01  | 0.83  | 0.20 | 0.02 | 0.06 | 0.00   | 0.00  | 0.22 | 0.93 | 0.63 | 0.74 | 0.56 | 0.37 | 0.92 | 0.98 | 0.84 | 0.67 | 0.74  | 0.08 | 0.83 | 0.99 | 0.63 | 0.34  |
| MEgreen         | 0.76 | 0.39  | 0.23  | 0.98  | 0.97 | 0.76  | 0.16  | 0.50 | 0.85 | 0.50 | 0.22   | 0.85  | 0.12 | 0.89 | 0.76 | 0.85 | 0.73 | 0.11 | 0.17 | 0.92 | 0.72 | 0.12 | 0.88  | 0.39 | 0.80 | 0.54 | 0.49 | 0.85  |
| MEgreenyellow   | 0.57 | 0.90  | 0.81  | 0.28  | 0.55 | 0.47  | 0.64  | 0.79 | 0.43 | 0.78 | 0.43   | 0.11  | 0.03 | 0.38 | 0.51 | 0.63 | 0.65 | 0.01 | 0.37 | 0.08 | 0.60 | 0.85 | 0.38  | 0.68 | 0.77 | 0.34 | 0.75 | 0.79  |
| MEgrey          | 0.70 | 0.48  | 0.82  | 0.71  | 0.76 | 0.01  | 0.49  | 0.07 | 0.22 | 0.51 | 0.24   | 0.00  | 0.14 | 0.74 | 0.48 | 0.15 | 0.75 | 0.13 | 0.01 | 0.74 | 0.06 | 0.50 | 0.01  | 0.92 | 0.81 | 0.43 | 0.43 | 0.19  |
| MEgrey60        | 0.02 | 0.49  | 0.12  | 0.73  | 0.34 | 0.19  | 0.38  | 0.57 | 0.94 | 0.94 | 0.64   | 0.04  | 0.02 | 0.56 | 0.06 | 0.97 | 0.72 | 0.08 | 0.02 | 0.20 | 0.06 | 0.61 | 0.09  | 0.64 | 0.90 | 0.27 | 0.39 | 0.04  |
| MElightcyan     | 0.93 | 0.05  | 0.62  | 0.31  | 0.57 | 0.64  | 0.07  | 0.46 | 0.78 | 0.61 | 0.74   | 0.46  | 0.00 | 0.75 | 0.41 | 0.09 | 0.56 | 0.00 | 0.00 | 0.43 | 0.23 | 0.95 | 0.67  | 0.03 | 0.66 | 0.35 | 0.21 | 0.45  |
| MElightgreen    | 0.63 | 0.71  | 0.74  | 0.58  | 0.56 | 0.74  | 1.00  | 0.78 | 0.86 | 0.29 | 0.20   | 0.99  | 0.95 | 0.85 | 0.46 | 0.62 | 0.89 | 0.58 | 0.92 | 0.41 | 0.75 | 0.23 | 0.51  | 0.84 | 0.97 | 0.38 | 0.86 | 0.39  |

Additional file 12: Table S9C. Protein levels with gene module correlations, 24h control

Control, 24h protein vs. module correlation

|                 | CCL13 | CCL17 | CCL19 | CCL2  | CCL20 | CCL22 | CCL3  | CCL4  | CSF2  | CXCL10 | CXCL5 | IL10  | IL15  | IL16  | IL18  | IL1A  | IL1B  | IL6   | IL7   | IL8   | MMP1  | MMP10 | MMP2  | MMP3  | MMP9  | TNF   | VEGFA |
|-----------------|-------|-------|-------|-------|-------|-------|-------|-------|-------|--------|-------|-------|-------|-------|-------|-------|-------|-------|-------|-------|-------|-------|-------|-------|-------|-------|-------|
| MEblack         | -0.16 | 0.27  | 0.13  | 0.37  | 0.07  | 0.42  | 0.11  | -0.15 | -0.20 | 0.17   | 0.21  | -0.57 | -0.24 | 0.51  | 0.00  | 0.17  | -0.60 | -0.19 | 0.23  | 0.32  | 0.04  | 0.15  | 0.36  | 0.47  | -0.40 | 0.16  | 0.12  |
| MEblue          | 0.34  | 0.27  | 0.32  | 0.44  | 0.66  | 0.35  | 0.40  | 0.15  | 0.13  | 0.41   | 0.37  | -0.31 | 0.49  | 0.45  | 0.57  | 0.68  | -0.11 | 0.20  | -0.02 | 0.54  | 0.50  | 0.53  | 0.12  | 0.23  | 0.03  | 0.10  | -0.12 |
| MEbrown         | -0.28 | -0.10 | -0.45 | -0.08 | -0.39 | -0.25 | -0.27 | -0.21 | 0.04  | -0.34  | -0.36 | 0.51  | -0.10 | 0.01  | -0.36 | -0.09 | 0.41  | 0.07  | -0.14 | -0.50 | -0.04 | -0.20 | -0.52 | -0.15 | 0.14  | 0.02  | 0.11  |
| MEcyan          | 0.18  | 0.10  | -0.02 | 0.03  | -0.07 | -0.19 | 0.01  | -0.15 | 0.11  | -0.10  | 0.00  | 0.22  | 0.35  | -0.03 | -0.05 | 0.01  | 0.21  | -0.09 | -0.34 | -0.09 | -0.06 | -0.03 | -0.47 | -0.07 | 0.26  | -0.27 | 0.00  |
| MEdarkgreen     | 0.07  | 0.13  | 0.18  | 0.08  | -0.15 | 0.32  | 0.17  | 0.04  | -0.14 | 0.36   | 0.38  | -0.69 | 0.06  | -0.22 | -0.09 | -0.14 | -0.74 | -0.31 | 0.16  | 0.50  | -0.10 | 0.09  | 0.15  | 0.16  | -0.52 | -0.13 | 0.24  |
| MEdarkgrey      | 0.43  | 0.35  | 0.21  | 0.42  | 0.52  | 0.36  | 0.33  | -0.02 | 0.69  | 0.56   | 0.14  | 0.21  | 0.20  | 0.12  | 0.31  | 0.46  | 0.32  | 0.62  | -0.42 | 0.13  | 0.03  | -0.17 | -0.06 | -0.04 | 0.35  | 0.00  | -0.03 |
| MEdarkorange    | 0.07  | 0.35  | 0.17  | 0.47  | 0.27  | 0.33  | 0.24  | -0.29 | -0.02 | 0.24   | 0.28  | -0.35 | 0.19  | 0.55  | 0.08  | 0.39  | -0.31 | -0.23 | -0.04 | 0.28  | 0.38  | 0.29  | 0.05  | 0.46  | 0.06  | -0.09 | 0.26  |
| MEdarkred       | -0.04 | -0.20 | 0.00  | -0.13 | 0.24  | -0.04 | -0.08 | 0.22  | -0.04 | 0.15   | -0.06 | 0.11  | 0.11  | -0.15 | 0.29  | 0.18  | 0.22  | 0.23  | 0.26  | 0.04  | 0.29  | 0.24  | 0.10  | -0.17 | 0.14  | 0.12  | -0.11 |
| MEdarkturquoise | -0.30 | 0.12  | -0.20 | 0.12  | -0.31 | 0.02  | -0.23 | -0.33 | 0.00  | -0.22  | -0.20 | 0.29  | -0.32 | 0.20  | -0.38 | -0.08 | 0.13  | 0.05  | -0.25 | -0.40 | -0.27 | -0.23 | -0.37 | 0.14  | 0.00  | 0.11  | 0.26  |
| MEgreen         | -0.67 | -0.25 | -0.58 | -0.25 | -0.57 | -0.36 | -0.50 | -0.17 | -0.42 | -0.68  | -0.63 | 0.34  | -0.54 | 0.32  | -0.42 | -0.22 | 0.20  | -0.19 | 0.28  | -0.53 | -0.09 | -0.06 | -0.12 | 0.03  | -0.09 | 0.26  | -0.20 |
| MEgreenyellow   | -0.39 | -0.23 | -0.47 | -0.28 | -0.52 | -0.30 | -0.40 | -0.11 | -0.02 | -0.42  | -0.57 | 0.58  | -0.57 | -0.16 | -0.42 | -0.41 | 0.42  | 0.20  | 0.02  | -0.62 | -0.43 | -0.43 | -0.30 | -0.21 | -0.07 | 0.21  | -0.06 |
| MEgrey          | -0.17 | 0.19  | 0.04  | 0.26  | 0.00  | 0.21  | -0.07 | -0.31 | 0.00  | 0.06   | 0.01  | -0.01 | -0.27 | 0.30  | -0.19 | 0.07  | -0.10 | -0.02 | -0.10 | -0.18 | -0.16 | -0.26 | 0.02  | 0.23  | 0.06  | 0.01  | 0.32  |
| MEgrey60        | 0.10  | -0.27 | 0.01  | -0.43 | -0.13 | -0.26 | -0.02 | 0.28  | -0.08 | -0.10  | -0.01 | -0.05 | 0.02  | -0.53 | 0.00  | -0.38 | -0.04 | -0.14 | 0.13  | 0.05  | -0.18 | -0.10 | 0.15  | -0.28 | -0.10 | -0.15 | -0.11 |
| MElightcyan     | -0.22 | -0.41 | -0.35 | -0.54 | -0.37 | -0.43 | -0.25 | 0.20  | -0.17 | -0.46  | -0.43 | 0.33  | -0.43 | -0.37 | -0.11 | -0.46 | 0.31  | 0.00  | 0.28  | -0.32 | -0.21 | -0.15 | 0.12  | -0.29 | -0.09 | 0.09  | -0.41 |
| MElightgreen    | 0.10  | -0.35 | 0.05  | -0.42 | 0.13  | -0.21 | -0.02 | 0.41  | 0.01  | 0.00   | -0.08 | 0.11  | -0.02 | -0.48 | 0.22  | -0.18 | 0.21  | 0.16  | 0.22  | 0.03  | 0.06  | 0.04  | 0.33  | -0.34 | 0.06  | 0.06  | -0.27 |
| MElightyellow   | 0.21  | -0.03 | 0.23  | 0.09  | 0.49  | 0.24  | 0.30  | 0.40  | 0.02  | 0.37   | 0.25  | -0.40 | 0.27  | 0.07  | 0.47  | 0.37  | -0.22 | 0.17  | 0.28  | 0.53  | 0.50  | 0.48  | 0.45  | 0.02  | -0.16 | 0.20  | -0.17 |
| MEmagenta       | 0.22  | 0.14  | 0.11  | 0.23  | 0.33  | 0.05  | 0.11  | -0.10 | 0.30  | 0.21   | 0.06  | 0.29  | 0.43  | 0.14  | 0.17  | 0.40  | 0.36  | 0.28  | -0.36 | -0.04 | 0.33  | 0.14  | -0.34 | -0.02 | 0.45  | -0.02 | 0.12  |
| MEmidnightblue  | -0.31 | 0.03  | -0.02 | 0.05  | -0.18 | 0.20  | -0.06 | -0.10 | -0.29 | -0.06  | 0.00  | -0.41 | -0.55 | 0.22  | -0.15 | -0.19 | -0.46 | -0.28 | 0.38  | 0.09  | -0.10 | -0.02 | 0.50  | 0.32  | -0.37 | 0.14  | -0.03 |
| MEorange        | -0.15 | -0.41 | -0.35 | -0.55 | -0.47 | -0.48 | -0.38 | 0.12  | 0.12  | -0.31  | -0.48 | 0.66  | -0.16 | -0.68 | -0.37 | -0.52 | 0.54  | 0.24  | -0.16 | -0.59 | -0.38 | -0.46 | -0.38 | -0.57 | 0.13  | 0.02  | 0.03  |
| MEpink          | -0.13 | -0.16 | -0.15 | -0.31 | -0.46 | -0.17 | -0.09 | 0.03  | -0.27 | -0.23  | -0.07 | -0.25 | -0.16 | -0.30 | -0.21 | -0.48 | -0.32 | -0.40 | 0.25  | 0.09  | -0.16 | 0.02  | 0.12  | -0.02 | -0.35 | -0.11 | -0.17 |
| MEpurple        | 0.02  | -0.17 | -0.15 | -0.17 | -0.01 | -0.22 | -0.14 | 0.00  | 0.20  | -0.03  | -0.20 | 0.52  | 0.20  | -0.28 | 0.01  | 0.02  | 0.55  | 0.25  | -0.15 | -0.28 | 0.22  | 0.04  | -0.34 | -0.29 | 0.41  | -0.02 | -0.02 |
| MEred           | 0.13  | 0.25  | 0.17  | 0.34  | 0.33  | 0.34  | 0.33  | 0.09  | -0.12 | 0.23   | 0.28  | -0.55 | 0.16  | 0.49  | 0.39  | 0.41  | -0.43 | -0.09 | 0.23  | 0.58  | 0.28  | 0.46  | 0.29  | 0.36  | -0.35 | 0.13  | -0.23 |
| MEroyalblue     | -0.40 | -0.14 | -0.35 | -0.24 | -0.64 | -0.19 | -0.32 | -0.28 | -0.18 | -0.35  | -0.34 | 0.17  | -0.52 | -0.20 | -0.61 | -0.55 | -0.03 | -0.23 | 0.05  | -0.45 | -0.39 | -0.44 | -0.14 | -0.02 | -0.14 | -0.04 | 0.22  |
| MEsalmon        | 0.35  | 0.11  | 0.21  | 0.16  | 0.37  | 0.07  | 0.31  | 0.16  | 0.07  | 0.26   | 0.30  | -0.27 | 0.62  | 0.13  | 0.30  | 0.38  | -0.14 | -0.06 | -0.10 | 0.43  | 0.41  | 0.38  | -0.04 | 0.04  | 0.08  | -0.15 | 0.02  |
| MEtan           | 0.24  | -0.24 | 0.03  | -0.36 | 0.06  | -0.32 | -0.05 | 0.29  | 0.22  | -0.05  | -0.07 | 0.40  | 0.19  | -0.57 | 0.12  | -0.18 | 0.44  | 0.25  | -0.20 | -0.18 | -0.21 | -0.22 | -0.16 | -0.48 | 0.26  | -0.14 | -0.11 |
| MEturquoise     | 0.33  | -0.04 | 0.09  | 0.00  | 0.38  | -0.09 | 0.18  | 0.18  | 0.24  | 0.18   | 0.06  | 0.25  | 0.53  | -0.10 | 0.36  | 0.35  | 0.40  | 0.28  | -0.20 | 0.11  | 0.37  | 0.26  | -0.22 | -0.20 | 0.37  | -0.07 | -0.11 |
| MEwhite         | -0.40 | -0.08 | -0.24 | -0.10 | -0.47 | 0.00  | -0.20 | -0.16 | -0.31 | -0.20  | -0.19 | -0.24 | -0.44 | 0.02  | -0.44 | -0.38 | -0.39 | -0.28 | 0.24  | -0.10 | -0.12 | -0.10 | 0.16  | 0.19  | -0.40 | 0.12  | 0.21  |
| MEyellow        | 0.06  | 0.35  | 0.22  | 0.56  | 0.48  | 0.44  | 0.27  | -0.10 | -0.01 | 0.28   | 0.26  | -0.36 | 0.10  | 0.73  | 0.33  | 0.62  | -0.25 | 0.07  | 0.07  | 0.37  | 0.39  | 0.40  | 0.21  | 0.46  | -0.06 | 0.19  | 0.01  |

Control, 24h protein vs. module correlation p value

|                 | CCL13 | CCL17 | CCL19 | CCL2 | CCL20 | CCL22 | CCL3 | CCL4 | CSF2 | CXCL10 | CXCL5 | IL10 | IL15 | IL16 | IL18 | IL1A | IL1B | IL6  | IL7  | IL8  | MMP1 | MMP10 | MMP2 | MMP3 | MMP9 | TNF  | VEGFA |
|-----------------|-------|-------|-------|------|-------|-------|------|------|------|--------|-------|------|------|------|------|------|------|------|------|------|------|-------|------|------|------|------|-------|
| MEblack         | 0.44  | 0.19  | 0.53  | 0.06 | 0.74  | 0.03  | 0.58 | 0.48 | 0.32 | 0.41   | 0.31  | 0.00 | 0.24 | 0.01 | 0.99 | 0.42 | 0.00 | 0.35 | 0.25 | 0.11 | 0.85 | 0.46  | 0.07 | 0.02 | 0.05 | 0.43 | 0.57  |
| MEblue          | 0.08  | 0.18  | 0.11  | 0.03 | 0.00  | 0.08  | 0.04 | 0.46 | 0.51 | 0.04   | 0.06  | 0.13 | 0.01 | 0.02 | 0.00 | 0.00 | 0.58 | 0.33 | 0.92 | 0.00 | 0.01 | 0.01  | 0.55 | 0.26 | 0.88 | 0.61 | 0.55  |
| MEbrown         | 0.16  | 0.62  | 0.02  | 0.69 | 0.05  | 0.21  | 0.18 | 0.31 | 0.86 | 0.09   | 0.07  | 0.01 | 0.62 | 0.94 | 0.07 | 0.67 | 0.04 | 0.74 | 0.50 | 0.01 | 0.84 | 0.33  | 0.01 | 0.47 | 0.51 | 0.92 | 0.59  |
| MEcyan          | 0.39  | 0.63  | 0.91  | 0.89 | 0.72  | 0.35  | 0.97 | 0.46 | 0.58 | 0.61   | 1.00  | 0.28 | 0.08 | 0.89 | 0.82 | 0.96 | 0.31 | 0.66 | 0.09 | 0.66 | 0.78 | 0.90  | 0.02 | 0.72 | 0.19 | 0.18 | 0.99  |
| MEdarkgreen     | 0.74  | 0.53  | 0.39  | 0.71 | 0.45  | 0.11  | 0.41 | 0.84 | 0.51 | 0.07   | 0.06  | 0.00 | 0.77 | 0.27 | 0.66 | 0.48 | 0.00 | 0.13 | 0.43 | 0.01 | 0.64 | 0.66  | 0.47 | 0.45 | 0.01 | 0.54 | 0.24  |
| MEdarkgrey      | 0.03  | 0.08  | 0.31  | 0.03 | 0.01  | 0.07  | 0.10 | 0.92 | 0.00 | 0.00   | 0.48  | 0.30 | 0.33 | 0.56 | 0.12 | 0.02 | 0.11 | 0.00 | 0.03 | 0.54 | 0.87 | 0.41  | 0.77 | 0.84 | 0.08 | 0.99 | 0.88  |
| MEdarkorange    | 0.74  | 0.08  | 0.39  | 0.02 | 0.18  | 0.10  | 0.24 | 0.15 | 0.92 | 0.23   | 0.17  | 0.08 | 0.34 | 0.00 | 0.70 | 0.05 | 0.12 | 0.27 | 0.83 | 0.16 | 0.05 | 0.15  | 0.81 | 0.02 | 0.79 | 0.67 | 0.20  |
| MEdarkred       | 0.86  | 0.32  | 0.98  | 0.52 | 0.24  | 0.84  | 0.71 | 0.28 | 0.85 | 0.45   | 0.79  | 0.60 | 0.60 | 0.47 | 0.15 | 0.39 | 0.28 | 0.27 | 0.21 | 0.83 | 0.15 | 0.23  | 0.62 | 0.42 | 0.49 | 0.55 | 0.61  |
| MEdarkturquoise | 0.13  | 0.55  | 0.33  | 0.57 | 0.12  | 0.92  | 0.26 | 0.09 | 0.98 | 0.27   | 0.32  | 0.14 | 0.11 | 0.32 | 0.06 | 0.71 | 0.54 | 0.81 | 0.22 | 0.04 | 0.18 | 0.26  | 0.06 | 0.48 | 0.98 | 0.59 | 0.21  |
| MEgreen         | 0.00  | 0.22  | 0.00  | 0.22 | 0.00  | 0.07  | 0.01 | 0.41 | 0.03 | 0.00   | 0.00  | 0.09 | 0.00 | 0.11 | 0.03 | 0.27 | 0.32 | 0.34 | 0.16 | 0.01 | 0.66 | 0.79  | 0.55 | 0.89 | 0.65 | 0.21 | 0.33  |
| MEgreenyellow   | 0.05  | 0.25  | 0.02  | 0.17 | 0.01  | 0.14  | 0.04 | 0.60 | 0.93 | 0.03   | 0.00  | 0.00 | 0.00 | 0.43 | 0.03 | 0.04 | 0.03 | 0.33 | 0.94 | 0.00 | 0.03 | 0.03  | 0.14 | 0.30 | 0.72 | 0.30 | 0.78  |
| MEgrey          | 0.41  | 0.35  | 0.83  | 0.19 | 0.98  | 0.31  | 0.74 | 0.13 | 0.98 | 0.77   | 0.95  | 0.96 | 0.19 | 0.13 | 0.34 | 0.73 | 0.63 | 0.91 | 0.64 | 0.37 | 0.43 | 0.20  | 0.92 | 0.25 | 0.78 | 0.96 | 0.11  |
| MEgrey60        | 0.61  | 0.19  | 0.95  | 0.03 | 0.54  | 0.20  | 0.91 | 0.17 | 0.70 | 0.64   | 0.95  | 0.82 | 0.92 | 0.01 | 0.99 | 0.06 | 0.83 | 0.48 | 0.54 | 0.82 | 0.39 | 0.63  | 0.46 | 0.16 | 0.64 | 0.47 | 0.58  |
| MElightcyan     | 0.28  | 0.04  | 0.08  | 0.00 | 0.07  | 0.03  | 0.22 | 0.34 | 0.39 | 0.02   | 0.03  | 0.10 | 0.03 | 0.06 | 0.59 | 0.02 | 0.13 | 0.99 | 0.16 | 0.12 | 0.30 | 0.46  | 0.57 | 0.14 | 0.65 | 0.65 | 0.04  |
| MElightgreen    | 0.63  | 0.08  | 0.80  | 0.03 | 0.53  | 0.30  | 0.91 | 0.04 | 0.97 | 1.00   | 0.69  | 0.60 | 0.91 | 0.01 | 0.27 | 0.38 | 0.31 | 0.43 | 0.29 | 0.90 | 0.77 | 0.84  | 0.10 | 0.09 | 0.79 | 0.76 | 0.19  |
| MElightyellow   | 0.30  | 0.87  | 0.25  | 0.66 | 0.01  | 0.24  | 0.14 | 0.04 | 0.93 | 0.06   | 0.22  | 0.04 | 0.18 | 0.74 | 0.02 | 0.06 | 0.29 | 0.41 | 0.16 | 0.01 | 0.01 | 0.01  | 0.02 | 0.91 | 0.44 | 0.32 | 0.42  |
| MEmagenta       | 0.28  | 0.50  | 0.60  | 0.27 | 0.10  | 0.80  | 0.60 | 0.63 | 0.14 | 0.31   | 0.77  | 0.15 | 0.03 | 0.50 | 0.42 | 0.04 | 0.07 | 0.17 | 0.07 | 0.86 | 0.10 | 0.48  | 0.09 | 0.93 | 0.02 | 0.92 | 0.55  |
| MEmidnightblue  | 0.13  | 0.87  | 0.90  | 0.80 | 0.38  | 0.34  | 0.78 | 0.62 | 0.15 | 0.77   | 0.98  | 0.04 | 0.00 |      |      |      |      |      |      |      |      |       |      |      |      |      |       |

**Additional file 12: Table S9D. Protein levels with gene module correlations, 24h infected**  
**Infected, 24h protein vs. module correlation**

|                 | GT2   | CCL13 | CCL17 | CCL19 | CCL2  | CCL20 | CCL22 | CCL3  | CCL4  | CSF2  | CXCL10 | CXCL5 | IL10  | IL15  | IL16  | IL18  | IL1A  | IL1B  | IL6   | IL7   | IL8   | MMP1  | MMP10 | MMP2  | MMP3  | MMP9  | TNF   | VEGFA |
|-----------------|-------|-------|-------|-------|-------|-------|-------|-------|-------|-------|--------|-------|-------|-------|-------|-------|-------|-------|-------|-------|-------|-------|-------|-------|-------|-------|-------|-------|
| MEblack         | -0.50 | -0.29 | 0.10  | -0.08 | 0.07  | -0.23 | 0.09  | 0.63  | 0.22  | -0.11 | 0.01   | 0.27  | -0.66 | -0.21 | 0.19  | -0.16 | -0.07 | -0.34 | 0.04  | -0.19 | 0.53  | -0.02 | -0.04 | 0.28  | 0.31  | -0.37 | 0.10  | -0.26 |
| MEblue          | -0.52 | -0.03 | 0.28  | 0.26  | 0.43  | 0.26  | 0.25  | 0.77  | 0.35  | 0.10  | 0.16   | 0.23  | -0.41 | 0.20  | 0.48  | 0.35  | 0.26  | -0.06 | 0.11  | -0.11 | 0.57  | 0.37  | 0.11  | 0.21  | 0.29  | -0.14 | 0.14  | -0.10 |
| MEbrown         | 0.01  | -0.25 | -0.16 | -0.32 | -0.14 | -0.45 | -0.31 | -0.16 | -0.12 | 0.04  | -0.40  | -0.41 | 0.51  | -0.20 | -0.13 | -0.26 | -0.23 | 0.26  | -0.02 | 0.16  | -0.51 | -0.28 | -0.08 | -0.47 | -0.37 | 0.03  | -0.12 | 0.05  |
| MEcyan          | 0.17  | 0.03  | 0.25  | 0.15  | 0.28  | -0.08 | 0.00  | 0.20  | -0.33 | 0.07  | -0.16  | -0.01 | -0.02 | 0.19  | 0.26  | -0.13 | -0.04 | -0.22 | -0.34 | 0.19  | -0.04 | -0.26 | 0.34  | -0.48 | 0.28  | 0.42  | -0.30 | 0.19  |
| MEdarkgreen     | -0.25 | 0.09  | 0.11  | 0.10  | 0.00  | -0.13 | 0.26  | 0.41  | 0.20  | -0.04 | 0.23   | 0.41  | -0.69 | 0.09  | -0.22 | -0.01 | 0.07  | -0.37 | -0.06 | -0.04 | 0.62  | -0.04 | -0.05 | 0.22  | 0.21  | -0.58 | -0.06 | -0.06 |
| MEdarkgrey      | -0.06 | 0.39  | 0.36  | 0.40  | 0.47  | 0.37  | 0.32  | 0.07  | 0.03  | 0.41  | 0.41   | 0.00  | 0.36  | 0.48  | 0.23  | 0.49  | 0.56  | 0.56  | 0.31  | 0.06  | 0.04  | 0.13  | -0.02 | -0.21 | 0.04  | 0.18  | 0.28  | -0.07 |
| MEdarkorange    | -0.28 | -0.09 | 0.16  | 0.14  | 0.25  | -0.03 | 0.07  | 0.73  | 0.23  | -0.15 | 0.04   | 0.23  | -0.64 | 0.15  | 0.27  | 0.03  | -0.05 | -0.54 | -0.35 | 0.04  | 0.52  | 0.07  | 0.17  | 0.15  | 0.30  | -0.09 | -0.28 | -0.05 |
| MEdarkred       | -0.21 | -0.07 | -0.17 | -0.05 | -0.05 | 0.21  | -0.02 | -0.04 | 0.31  | -0.02 | 0.12   | -0.20 | 0.25  | -0.01 | 0.00  | 0.25  | 0.06  | 0.28  | 0.19  | -0.09 | -0.09 | 0.37  | -0.24 | 0.20  | -0.28 | -0.13 | 0.14  | 0.01  |
| MEdarkturquoise | 0.00  | -0.34 | 0.04  | -0.19 | -0.07 | -0.44 | -0.09 | -0.14 | -0.35 | 0.07  | -0.39  | -0.26 | 0.31  | -0.26 | 0.04  | -0.38 | -0.17 | 0.18  | 0.09  | 0.00  | -0.37 | -0.47 | 0.00  | -0.50 | -0.01 | 0.13  | 0.07  | -0.05 |
| MEgreen         | -0.22 | -0.74 | -0.39 | -0.65 | -0.44 | -0.66 | -0.47 | 0.03  | -0.03 | -0.34 | -0.61  | -0.49 | 0.02  | -0.77 | 0.01  | -0.69 | -0.67 | -0.27 | -0.16 | -0.13 | -0.36 | -0.37 | -0.26 | 0.06  | -0.17 | -0.09 | -0.15 | -0.25 |
| MEgreenyellow   | 0.21  | -0.26 | -0.30 | -0.38 | -0.37 | -0.36 | -0.33 | -0.54 | -0.22 | 0.02  | -0.35  | -0.56 | 0.67  | -0.45 | -0.22 | -0.34 | -0.22 | 0.45  | 0.21  | -0.10 | -0.68 | -0.36 | -0.22 | -0.31 | -0.35 | 0.03  | 0.14  | -0.10 |
| MEgrey          | 0.20  | 0.45  | 0.34  | 0.48  | 0.41  | 0.43  | 0.34  | -0.10 | -0.06 | 0.37  | 0.38   | 0.07  | 0.39  | 0.54  | 0.15  | 0.47  | 0.58  | 0.63  | 0.42  | 0.03  | 0.02  | 0.09  | 0.16  | -0.25 | 0.08  | 0.20  | 0.42  | 0.06  |
| MEgrey60        | 0.45  | 0.21  | -0.09 | 0.08  | -0.22 | 0.13  | 0.02  | -0.38 | -0.13 | -0.16 | 0.06   | 0.10  | -0.15 | 0.06  | -0.29 | -0.02 | -0.37 | -0.30 | -0.19 | 0.13  | 0.00  | -0.13 | -0.05 | 0.27  | 0.02  | 0.04  | -0.17 | 0.04  |
| MElightcyan     | 0.24  | -0.13 | -0.42 | -0.47 | -0.54 | -0.21 | -0.31 | -0.71 | -0.20 | -0.15 | -0.23  | -0.26 | 0.27  | -0.50 | -0.38 | -0.35 | -0.38 | -0.04 | -0.06 | -0.05 | -0.49 | -0.13 | -0.32 | 0.20  | -0.30 | -0.05 | -0.10 | -0.10 |
| MElightgreen    | 0.28  | 0.19  | -0.24 | -0.02 | -0.26 | 0.30  | -0.03 | -0.56 | 0.08  | -0.04 | 0.09   | -0.07 | 0.27  | -0.01 | -0.30 | 0.22  | 0.05  | 0.19  | 0.12  | 0.01  | -0.22 | 0.22  | -0.23 | 0.33  | -0.31 | -0.02 | 0.09  | -0.02 |
| MElightyellow   | -0.43 | 0.13  | 0.01  | 0.16  | 0.15  | 0.30  | 0.18  | 0.47  | 0.61  | 0.07  | 0.32   | 0.21  | -0.30 | 0.17  | 0.08  | 0.42  | 0.24  | 0.08  | 0.24  | -0.22 | 0.52  | 0.54  | -0.13 | 0.50  | -0.08 | -0.41 | 0.24  | -0.28 |
| MEmagenta       | -0.11 | 0.09  | 0.14  | 0.24  | 0.31  | 0.26  | 0.04  | 0.23  | 0.13  | 0.17  | 0.08   | -0.16 | 0.30  | 0.30  | 0.28  | 0.30  | 0.20  | 0.29  | 0.06  | 0.03  | -0.07 | 0.21  | 0.18  | -0.27 | -0.08 | 0.29  | 0.02  | 0.18  |
| MEmidnightblue  | -0.19 | -0.16 | -0.22 | -0.32 | -0.34 | -0.19 | -0.06 | -0.04 | 0.12  | -0.20 | 0.01   | 0.26  | -0.49 | -0.40 | -0.25 | -0.26 | -0.25 | -0.39 | -0.02 | -0.17 | 0.25  | 0.05  | -0.29 | 0.54  | 0.04  | -0.41 | 0.02  | -0.26 |
| MEorange        | 0.42  | 0.05  | -0.22 | -0.15 | -0.28 | -0.14 | -0.23 | -0.64 | -0.22 | 0.12  | -0.18  | -0.49 | 0.78  | -0.11 | -0.34 | -0.12 | -0.05 | 0.49  | 0.13  | 0.07  | -0.69 | -0.30 | -0.09 | -0.42 | -0.44 | 0.19  | 0.04  | 0.05  |
| MEpink          | 0.09  | -0.06 | -0.08 | -0.24 | -0.22 | -0.42 | -0.11 | 0.05  | -0.17 | -0.07 | -0.26  | 0.19  | -0.46 | -0.26 | -0.27 | -0.43 | -0.32 | -0.60 | -0.39 | 0.08  | 0.15  | -0.33 | 0.01  | 0.04  | 0.12  | -0.25 | -0.35 | -0.21 |
| MEpurple        | 0.10  | 0.08  | -0.14 | -0.04 | -0.03 | 0.13  | -0.12 | -0.27 | 0.07  | 0.12  | -0.03  | -0.34 | 0.58  | 0.09  | -0.08 | 0.17  | 0.04  | 0.37  | 0.03  | 0.07  | -0.40 | 0.18  | -0.06 | -0.21 | -0.39 | 0.13  | -0.04 | 0.10  |
| MEred           | -0.55 | -0.24 | 0.14  | -0.04 | 0.18  | -0.16 | 0.09  | 0.80  | 0.27  | -0.06 | 0.02   | 0.27  | -0.72 | -0.14 | 0.30  | -0.08 | -0.06 | -0.44 | -0.09 | -0.16 | 0.62  | 0.08  | 0.01  | 0.29  | 0.36  | -0.35 | -0.02 | -0.27 |
| MEroyalblue     | 0.36  | -0.11 | -0.17 | -0.34 | -0.32 | -0.52 | -0.23 | -0.42 | -0.34 | -0.04 | -0.36  | -0.26 | 0.27  | -0.28 | -0.36 | -0.48 | -0.29 | -0.01 | -0.11 | 0.11  | -0.44 | -0.55 | -0.13 | -0.36 | -0.21 | -0.03 | -0.13 | -0.14 |
| MEsalmon        | -0.22 | 0.05  | 0.20  | 0.28  | 0.31  | 0.07  | 0.10  | 0.75  | 0.29  | -0.06 | 0.10   | 0.23  | -0.55 | 0.30  | 0.24  | 0.14  | 0.07  | -0.40 | -0.26 | 0.04  | 0.54  | 0.09  | 0.24  | 0.05  | 0.23  | -0.01 | -0.22 | -0.01 |
| MEtan           | 0.52  | 0.36  | -0.01 | 0.24  | -0.02 | 0.41  | 0.08  | -0.63 | -0.19 | 0.10  | 0.17   | -0.10 | 0.52  | 0.31  | -0.16 | 0.29  | 0.25  | 0.40  | 0.17  | 0.15  | -0.35 | 0.06  | 0.04  | -0.12 | -0.16 | 0.34  | 0.13  | 0.32  |
| MEturquoise     | -0.04 | 0.18  | 0.06  | 0.18  | 0.24  | 0.32  | 0.02  | 0.14  | 0.18  | 0.16  | 0.15   | -0.11 | 0.26  | 0.32  | 0.16  | 0.34  | 0.19  | 0.22  | -0.01 | 0.06  | -0.04 | 0.32  | 0.09  | -0.13 | -0.15 | 0.19  | -0.04 | 0.13  |
| MEwhite         | -0.15 | -0.32 | -0.11 | -0.28 | -0.21 | -0.54 | -0.18 | 0.31  | 0.08  | -0.14 | -0.29  | -0.09 | -0.31 | -0.37 | -0.15 | -0.39 | -0.27 | -0.30 | -0.11 | -0.03 | 0.10  | -0.43 | -0.11 | 0.01  | -0.04 | -0.32 | -0.12 | -0.35 |
| MEyellow        | -0.61 | -0.20 | 0.22  | 0.11  | 0.34  | 0.10  | 0.18  | 0.76  | 0.33  | 0.01  | 0.08   | 0.19  | -0.45 | 0.01  | 0.49  | 0.20  | 0.14  | -0.09 | 0.14  | -0.17 | 0.53  | 0.29  | 0.05  | 0.27  | 0.31  | -0.22 | 0.17  | -0.15 |

**Infected, 24h protein vs. module correlation p value**

|                 | GT2  | CCL13 | CCL17 | CCL19 | CCL2 | CCL20 | CCL22 | CCL3 | CCL4 | CSF2 | CXCL10 | CXCL5 | IL10 | IL15 | IL16 | IL18 | IL1A | IL1B | IL6  | IL7  | IL8  | MMP1 | MMP10 | MMP2 | MMP3 | MMP9 | TNF  | VEGFA |
|-----------------|------|-------|-------|-------|------|-------|-------|------|------|------|--------|-------|------|------|------|------|------|------|------|------|------|------|-------|------|------|------|------|-------|
| MEblack         | 0.01 | 0.15  | 0.64  | 0.69  | 0.75 | 0.25  | 0.65  | 0.00 | 0.29 | 0.59 | 0.97   | 0.18  | 0.00 | 0.31 | 0.36 | 0.43 | 0.73 | 0.09 | 0.84 | 0.34 | 0.00 | 0.91 | 0.84  | 0.17 | 0.13 | 0.06 | 0.64 | 0.19  |
| MEblue          | 0.01 | 0.87  | 0.16  | 0.20  | 0.03 | 0.21  | 0.22  | 0.00 | 0.08 | 0.64 | 0.44   | 0.26  | 0.04 | 0.32 | 0.01 | 0.08 | 0.20 | 0.78 | 0.58 | 0.60 | 0.00 | 0.07 | 0.60  | 0.30 | 0.16 | 0.49 | 0.48 | 0.62  |
| MEbrown         | 0.97 | 0.23  | 0.43  | 0.11  | 0.48 | 0.02  | 0.12  | 0.45 | 0.56 | 0.83 | 0.04   | 0.04  | 0.01 | 0.33 | 0.52 | 0.20 | 0.27 | 0.19 | 0.91 | 0.44 | 0.01 | 0.16 | 0.70  | 0.02 | 0.06 | 0.88 | 0.58 | 0.80  |
| MEcyan          | 0.41 | 0.87  | 0.22  | 0.48  | 0.17 | 0.70  | 1.00  | 0.34 | 0.10 | 0.72 | 0.42   | 0.98  | 0.93 | 0.36 | 0.21 | 0.51 | 0.85 | 0.27 | 0.09 | 0.35 | 0.84 | 0.20 | 0.09  | 0.01 | 0.17 | 0.03 | 0.14 | 0.34  |
| MEdarkgreen     | 0.22 | 0.66  | 0.59  | 0.62  | 0.99 | 0.53  | 0.20  | 0.04 | 0.33 | 0.85 | 0.25   | 0.04  | 0.00 | 0.67 | 0.28 | 0.94 | 0.74 | 0.06 | 0.76 | 0.85 | 0.00 | 0.86 | 0.82  | 0.29 | 0.30 | 0.00 | 0.75 | 0.76  |
| MEdarkgrey      | 0.78 | 0.05  | 0.07  | 0.04  | 0.02 | 0.06  | 0.12  | 0.73 | 0.87 | 0.04 | 0.04   | 1.00  | 0.07 | 0.01 | 0.25 | 0.01 | 0.00 | 0.00 | 0.13 | 0.77 | 0.84 | 0.54 | 0.94  | 0.31 | 0.86 | 0.38 | 0.17 | 0.73  |
| MEdarkorange    | 0.16 | 0.67  | 0.42  | 0.49  | 0.22 | 0.88  | 0.73  | 0.00 | 0.26 | 0.47 | 0.86   | 0.27  | 0.00 | 0.47 | 0.18 | 0.89 | 0.79 | 0.00 | 0.08 | 0.85 | 0.01 | 0.74 | 0.40  | 0.47 | 0.14 | 0.67 | 0.17 | 0.80  |
| MEdarkred       | 0.31 | 0.75  | 0.42  | 0.81  | 0.80 | 0.30  | 0.91  | 0.83 | 0.12 | 0.92 | 0.55   | 0.33  | 0.22 | 0.96 | 0.99 | 0.22 | 0.78 | 0.16 | 0.35 | 0.65 | 0.67 | 0.06 | 0.25  | 0.32 | 0.17 | 0.52 | 0.48 | 0.95  |
| MEdarkturquoise | 0.99 | 0.09  | 0.84  | 0.35  | 0.75 | 0.02  | 0.65  | 0.51 | 0.08 | 0.74 | 0.05   | 0.20  | 0.12 | 0.20 | 0.84 | 0.06 | 0.42 | 0.38 | 0.66 | 0.99 | 0.07 | 0.02 | 0.99  | 0.01 | 0.95 | 0.52 | 0.73 | 0.79  |
| MEgreen         | 0.28 | 0.00  | 0.05  | 0.00  | 0.02 | 0.00  | 0.02  | 0.88 | 0.88 | 0.09 | 0.00   | 0.01  | 0.90 | 0.00 | 0.95 | 0.00 | 0.00 | 0.18 | 0.44 | 0.52 | 0.07 | 0.06 | 0.21  | 0.77 | 0.39 | 0.67 | 0.47 | 0.22  |
| MEgreenyellow   | 0.30 | 0.20  | 0.13  | 0.06  | 0.06 | 0.07  | 0.10  | 0.00 | 0.27 | 0.93 | 0.08   | 0.00  | 0.00 | 0.02 | 0.28 | 0.09 | 0.29 | 0.02 | 0.31 | 0.63 | 0.00 | 0.07 | 0.28  | 0.12 | 0.08 | 0.90 | 0.49 | 0.64  |
| MEgrey          | 0.33 | 0.02  | 0.09  | 0.01  | 0.04 | 0.03  | 0.09  | 0.63 | 0.77 | 0.06 | 0.05   | 0.75  | 0.05 | 0.00 | 0.46 | 0.01 | 0.00 | 0.00 | 0.03 | 0.90 | 0.93 | 0.67 | 0.45  | 0.22 | 0.70 | 0.32 | 0.03 | 0.78  |
| MEgrey60        | 0.02 | 0.31  | 0.65  | 0.69  | 0.28 | 0.54  | 0.91  | 0.05 | 0.52 | 0.43 | 0.79   | 0.62  | 0.47 | 0.77 | 0.15 | 0.93 | 0.74 | 0.14 | 0.35 | 0.53 | 0.98 | 0.53 | 0.83  | 0.19 | 0.91 | 0.86 | 0.41 | 0.85  |
| MElightcyan     | 0.24 | 0.52  | 0.03  | 0.02  | 0.00 | 0.29  | 0.12  | 0.00 | 0.34 | 0.46 | 0.25   | 0.21  | 0.19 | 0.01 | 0.06 | 0.08 | 0.06 | 0.83 | 0.75 | 0.83 | 0.01 | 0.51 | 0.11  | 0.32 | 0.13 | 0.81 | 0.64 | 0.63  |
| MElightgreen    | 0.17 | 0.35  | 0.24  | 0.92  | 0.19 | 0.14  | 0.88  | 0.00 | 0.69 | 0.86 | 0.66   | 0.72  | 0.18 | 0.97 | 0.14 | 0.28 | 0.79 | 0.35 | 0.55 | 0.95 | 0.28 | 0.27 | 0.26  | 0.10 | 0.12 | 0.91 | 0.67 | 0.92  |
| MElightyellow   | 0.03 | 0.54  | 0.97  | 0.42  | 0.46 | 0.13  | 0.39  | 0.02 | 0.00 | 0.72 | 0.12   | 0.30  | 0.13 | 0.42 | 0.71 | 0.03 | 0.23 | 0.69 | 0.25 | 0.28 | 0.01 | 0.00 | 0.54  | 0.01 | 0.69 | 0.04 | 0.23 | 0.16  |

Additional file 12: Table S9E. Protein levels with gene module correlations, 72h control  
Control, 72h protein vs. module correlation

|                  | CCL13 | CCL17 | CCL19 | CCL2  | CCL20 | CCL22 | CCL3  | CCL4  | CSF2  | CXCL10 | CXCL5 | IL10  | IL15  | IL16  | IL18  | IL1A  | IL1B  | IL6   | IL7   | IL8   | MMP1  | MMP10 | MMP2  | MMP3  | MMP9  | TNF   | VEGFA |
|------------------|-------|-------|-------|-------|-------|-------|-------|-------|-------|--------|-------|-------|-------|-------|-------|-------|-------|-------|-------|-------|-------|-------|-------|-------|-------|-------|-------|
| MEblack          | 0.09  | 0.50  | 0.29  | 0.51  | 0.12  | 0.52  | 0.17  | -0.13 | 0.02  | 0.35   | 0.23  | -0.40 | -0.02 | 0.31  | 0.24  | 0.24  | -0.37 | -0.10 | -0.07 | 0.34  | -0.26 | 0.09  | 0.13  | 0.50  | 0.05  | 0.01  | 0.01  |
| MEblue           | -0.38 | 0.23  | -0.24 | 0.33  | -0.45 | 0.00  | -0.02 | -0.10 | -0.08 | -0.15  | -0.22 | 0.11  | -0.48 | 0.37  | -0.38 | 0.11  | 0.01  | -0.27 | -0.19 | -0.31 | 0.00  | -0.27 | -0.01 | 0.20  | -0.32 | 0.09  | -0.25 |
| MEbrown          | 0.52  | 0.46  | 0.41  | 0.39  | 0.67  | 0.50  | 0.34  | -0.01 | 0.20  | 0.34   | 0.34  | -0.15 | 0.08  | 0.24  | 0.63  | 0.29  | 0.02  | 0.40  | -0.16 | 0.40  | 0.07  | 0.38  | 0.19  | 0.33  | 0.18  | 0.08  | 0.09  |
| MEcyan           | -0.22 | 0.01  | -0.01 | 0.09  | -0.32 | -0.06 | -0.30 | -0.30 | -0.24 | -0.02  | 0.14  | -0.32 | 0.15  | -0.04 | -0.22 | -0.19 | -0.43 | -0.41 | 0.21  | 0.04  | -0.30 | -0.23 | -0.09 | 0.15  | -0.38 | -0.29 | 0.18  |
| MEdarkgreen      | 0.09  | -0.15 | -0.08 | 0.33  | 0.18  | -0.05 | 0.20  | 0.13  | -0.07 | -0.16  | -0.19 | 0.31  | 0.07  | -0.01 | 0.13  | 0.22  | 0.44  | 0.26  | 0.05  | -0.05 | 0.22  | 0.36  | -0.10 | -0.17 | 0.22  | 0.29  | 0.04  |
| MEdarkgrey       | -0.11 | 0.27  | -0.25 | 0.32  | -0.11 | -0.03 | 0.22  | -0.01 | 0.11  | -0.24  | -0.23 | 0.43  | -0.60 | 0.41  | -0.17 | 0.20  | 0.43  | 0.16  | -0.36 | -0.37 | 0.32  | -0.09 | 0.02  | 0.06  | -0.32 | 0.23  | -0.29 |
| MEdarkolivegreen | -0.16 | -0.03 | -0.12 | 0.07  | -0.31 | -0.17 | -0.21 | -0.16 | -0.06 | -0.17  | 0.06  | 0.03  | -0.23 | 0.03  | -0.34 | -0.12 | -0.07 | -0.21 | -0.19 | -0.18 | -0.13 | -0.20 | -0.17 | 0.06  | -0.27 | -0.04 | -0.07 |
| MEdarkorange     | -0.29 | -0.59 | -0.33 | -0.65 | -0.33 | -0.58 | -0.20 | 0.12  | -0.01 | -0.31  | -0.38 | 0.40  | 0.09  | -0.45 | -0.36 | -0.32 | 0.32  | 0.00  | 0.18  | -0.39 | 0.19  | -0.19 | -0.21 | -0.61 | 0.00  | -0.04 | -0.08 |
| MEdarkred        | 0.48  | 0.40  | 0.57  | 0.17  | 0.39  | 0.51  | 0.27  | -0.03 | 0.46  | 0.74   | 0.09  | 0.09  | 0.26  | -0.28 | 0.36  | -0.10 | 0.01  | 0.46  | -0.48 | 0.24  | 0.02  | 0.00  | -0.46 | -0.07 | 0.41  | -0.11 | -0.01 |
| MEdarkturquoise  | -0.30 | 0.00  | -0.18 | 0.04  | -0.45 | -0.27 | -0.28 | -0.30 | -0.07 | -0.24  | -0.07 | 0.13  | -0.17 | 0.02  | -0.43 | -0.22 | -0.02 | -0.25 | -0.10 | -0.33 | 0.04  | -0.36 | -0.22 | -0.04 | -0.51 | -0.14 | -0.07 |
| MEgreen          | -0.39 | -0.47 | -0.37 | -0.35 | -0.42 | -0.52 | -0.43 | -0.08 | -0.34 | -0.43  | -0.08 | -0.09 | 0.15  | -0.14 | -0.44 | -0.25 | -0.15 | -0.42 | 0.39  | -0.22 | 0.00  | -0.22 | 0.03  | -0.22 | -0.33 | -0.22 | 0.21  |
| MEgreenyellow    | 0.07  | -0.14 | -0.15 | -0.12 | 0.11  | -0.21 | -0.08 | -0.06 | -0.11 | -0.25  | 0.01  | 0.17  | 0.05  | 0.06  | -0.01 | -0.02 | 0.22  | 0.08  | 0.09  | -0.13 | 0.22  | 0.07  | -0.03 | -0.08 | -0.18 | 0.02  | 0.15  |
| MEgrey           | -0.03 | -0.35 | 0.04  | -0.34 | -0.10 | -0.24 | -0.38 | -0.11 | -0.20 | 0.00   | 0.15  | -0.15 | 0.43  | -0.45 | -0.11 | -0.37 | -0.27 | -0.20 | 0.27  | 0.05  | -0.27 | -0.09 | -0.23 | -0.24 | -0.13 | -0.36 | 0.32  |
| MEgrey60         | 0.03  | -0.21 | 0.16  | -0.21 | -0.04 | -0.02 | -0.17 | -0.12 | -0.01 | 0.04   | 0.25  | -0.42 | 0.35  | -0.30 | 0.05  | -0.22 | -0.42 | -0.18 | 0.23  | 0.31  | -0.36 | -0.05 | 0.08  | -0.01 | 0.14  | -0.11 | 0.11  |
| MElightcyan      | -0.32 | -0.03 | -0.39 | -0.05 | -0.32 | -0.32 | -0.05 | -0.06 | -0.10 | -0.36  | -0.38 | 0.49  | -0.30 | 0.23  | -0.38 | 0.05  | 0.47  | -0.04 | -0.08 | -0.53 | 0.50  | -0.13 | -0.17 | -0.13 | -0.31 | 0.13  | -0.13 |
| MElightgreen     | 0.20  | 0.43  | -0.01 | 0.21  | 0.16  | 0.31  | 0.62  | -0.10 | 0.36  | -0.09  | -0.25 | 0.40  | -0.49 | 0.31  | 0.19  | 0.31  | 0.56  | 0.53  | -0.42 | -0.07 | 0.42  | 0.12  | -0.03 | 0.21  | 0.12  | 0.63  | -0.28 |
| MElightyellow    | -0.07 | -0.57 | -0.03 | -0.59 | -0.11 | -0.40 | -0.32 | 0.10  | -0.01 | 0.00   | -0.10 | 0.10  | 0.39  | -0.69 | -0.11 | -0.48 | -0.03 | -0.01 | 0.25  | -0.07 | -0.25 | -0.16 | -0.22 | -0.60 | 0.05  | -0.35 | 0.11  |
| MEmagenta        | 0.40  | -0.07 | 0.30  | -0.12 | 0.38  | 0.06  | -0.01 | -0.06 | 0.18  | 0.17   | 0.30  | -0.15 | 0.33  | -0.31 | 0.33  | -0.21 | -0.11 | 0.23  | 0.01  | 0.29  | -0.10 | 0.08  | -0.01 | -0.06 | 0.17  | -0.11 | 0.17  |
| MEmidnightblue   | 0.09  | 0.11  | 0.32  | 0.14  | -0.03 | -0.28 | -0.03 | 0.00  | -0.05 | 0.34   | 0.37  | -0.59 | 0.15  | -0.23 | 0.06  | -0.11 | -0.66 | -0.21 | -0.04 | 0.44  | -0.55 | -0.04 | 0.06  | 0.21  | 0.09  | -0.29 | 0.16  |
| MEorange         | 0.35  | 0.19  | 0.18  | 0.00  | 0.39  | 0.12  | 0.26  | 0.01  | 0.23  | 0.16   | 0.07  | 0.28  | 0.06  | 0.01  | 0.27  | 0.18  | 0.40  | 0.43  | -0.19 | 0.02  | 0.46  | 0.32  | -0.19 | 0.00  | 0.18  | 0.18  | 0.01  |
| MEpaleturquoise  | -0.35 | 0.00  | -0.14 | 0.30  | -0.40 | -0.09 | -0.36 | -0.09 | -0.21 | -0.13  | 0.10  | -0.30 | -0.19 | 0.17  | -0.31 | -0.15 | -0.47 | -0.52 | 0.06  | -0.07 | -0.47 | -0.38 | 0.22  | 0.12  | -0.44 | -0.31 | -0.09 |
| MEpink           | 0.34  | 0.60  | 0.22  | 0.34  | 0.35  | 0.51  | 0.64  | -0.08 | 0.34  | 0.22   | -0.05 | 0.19  | -0.27 | 0.35  | 0.36  | 0.43  | 0.39  | 0.50  | -0.39 | 0.14  | 0.44  | 0.32  | -0.05 | 0.39  | 0.32  | 0.55  | -0.19 |
| MEpurple         | -0.08 | -0.27 | -0.04 | -0.32 | 0.03  | -0.13 | -0.04 | 0.20  | 0.04  | 0.03   | -0.27 | 0.17  | 0.20  | -0.21 | 0.07  | -0.08 | 0.19  | 0.07  | 0.20  | -0.08 | 0.14  | 0.05  | 0.03  | -0.26 | 0.33  | 0.05  | -0.05 |
| MEred            | -0.19 | 0.04  | 0.01  | 0.14  | -0.33 | 0.01  | -0.22 | -0.17 | -0.09 | 0.00   | 0.16  | -0.35 | -0.04 | 0.00  | -0.24 | -0.14 | -0.46 | -0.38 | 0.02  | 0.07  | -0.34 | -0.27 | 0.04  | 0.19  | -0.17 | -0.14 | -0.01 |
| MEroyalblue      | -0.15 | 0.25  | 0.10  | 0.32  | -0.26 | 0.19  | -0.04 | 0.08  | 0.01  | 0.13   | 0.08  | -0.22 | -0.26 | 0.05  | -0.13 | -0.05 | -0.34 | -0.22 | -0.22 | 0.06  | -0.36 | -0.20 | 0.01  | 0.24  | -0.15 | -0.11 | -0.16 |
| MEsaddlebrown    | 0.22  | 0.38  | 0.44  | 0.17  | 0.11  | 0.37  | 0.19  | -0.11 | 0.29  | 0.42   | 0.18  | -0.14 | 0.02  | -0.26 | 0.25  | -0.09 | -0.20 | 0.21  | -0.26 | 0.23  | -0.20 | -0.07 | -0.26 | 0.17  | 0.03  | -0.13 | -0.08 |
| MEsalmon         | -0.15 | -0.28 | 0.03  | -0.33 | -0.27 | -0.14 | -0.13 | 0.00  | 0.06  | 0.02   | -0.05 | -0.14 | 0.13  | -0.42 | -0.16 | -0.26 | -0.21 | -0.15 | 0.06  | 0.07  | -0.28 | -0.16 | -0.06 | -0.17 | 0.23  | -0.06 | -0.10 |
| MEskyblue        | -0.18 | 0.04  | -0.15 | -0.06 | -0.21 | -0.06 | 0.16  | 0.10  | 0.13  | -0.07  | -0.42 | 0.43  | -0.35 | -0.03 | -0.15 | 0.01  | 0.38  | 0.14  | -0.20 | -0.33 | 0.19  | -0.11 | -0.16 | -0.10 | 0.04  | 0.20  | -0.29 |
| MEsteelblue      | -0.04 | 0.13  | 0.08  | 0.24  | -0.15 | 0.11  | -0.11 | -0.18 | -0.14 | -0.01  | 0.33  | -0.48 | 0.03  | 0.09  | -0.08 | -0.05 | -0.52 | -0.31 | 0.01  | 0.24  | -0.37 | -0.11 | 0.17  | 0.29  | -0.24 | -0.16 | 0.08  |
| MEtan            | 0.59  | 0.59  | 0.51  | 0.26  | 0.62  | 0.62  | 0.62  | -0.11 | 0.33  | 0.47   | 0.32  | -0.12 | 0.14  | 0.13  | 0.63  | 0.44  | 0.18  | 0.51  | -0.21 | 0.50  | 0.38  | 0.62  | -0.08 | 0.50  | 0.57  | 0.46  | 0.04  |
| MEturquoise      | 0.11  | -0.35 | -0.02 | -0.50 | 0.14  | -0.28 | -0.07 | 0.02  | 0.05  | -0.03  | -0.14 | 0.32  | 0.32  | -0.39 | 0.04  | -0.16 | 0.35  | 0.24  | 0.11  | -0.12 | 0.26  | 0.12  | -0.29 | -0.38 | 0.19  | -0.02 | 0.15  |
| MEviolet         | -0.17 | -0.19 | -0.41 | 0.18  | -0.12 | -0.22 | -0.15 | 0.21  | -0.23 | -0.44  | 0.00  | 0.00  | -0.32 | 0.40  | -0.23 | 0.13  | -0.02 | -0.24 | 0.12  | -0.18 | -0.24 | -0.19 | 0.36  | -0.13 | -0.43 | -0.05 | -0.11 |
| MEwhite          | 0.07  | 0.04  | 0.16  | 0.26  | 0.07  | 0.16  | -0.21 | -0.05 | -0.15 | 0.13   | 0.35  | -0.51 | 0.15  | 0.05  | 0.12  | -0.11 | -0.57 | -0.27 | 0.16  | 0.32  | -0.53 | -0.10 | 0.27  | 0.19  | -0.13 | -0.29 | 0.16  |
| MEyellow         | 0.24  | 0.50  | 0.28  | 0.60  | 0.24  | 0.50  | 0.18  | -0.05 | 0.07  | 0.28   | 0.34  | -0.36 | -0.19 | 0.34  | 0.28  | 0.20  | -0.35 | 0.01  | -0.22 | 0.33  | -0.30 | 0.04  | 0.22  | 0.46  | -0.08 | -0.03 | -0.02 |

Control, 72h protein vs. module correlation p value

|                  | CCL13 | CCL17 | CCL19 | CCL2 | CCL20 | CCL22 | CCL3 | CCL4 | CSF2 | CXCL10 | CXCL5 | IL10 | IL15 | IL16 | IL18 | IL1A | IL1B | IL6  | IL7  | IL8  | MMP1 | MMP10 | MMP2 | MMP3 | MMP9 | TNF  | VEGFA |
|------------------|-------|-------|-------|------|-------|-------|------|------|------|--------|-------|------|------|------|------|------|------|------|------|------|------|-------|------|------|------|------|-------|
| MEblack          | 0.65  | 0.01  | 0.15  | 0.01 | 0.58  | 0.01  | 0.42 | 0.53 | 0.91 | 0.08   | 0.25  | 0.04 | 0.91 | 0.13 | 0.24 | 0.23 | 0.06 | 0.62 | 0.73 | 0.09 | 0.21 | 0.68  | 0.52 | 0.01 | 0.79 | 0.94 | 0.96  |
| MEblue           | 0.06  | 0.26  | 0.23  | 0.10 | 0.02  | 0.99  | 0.91 | 0.63 | 0.70 | 0.46   | 0.27  | 0.59 | 0.01 | 0.07 | 0.05 | 0.60 | 0.97 | 0.18 | 0.36 | 0.13 | 1.00 | 0.18  | 0.97 | 0.32 | 0.12 | 0.65 | 0.22  |
| MEbrown          | 0.01  | 0.02  | 0.04  | 0.05 | 0.00  | 0.01  | 0.09 | 0.96 | 0.32 | 0.09   | 0.09  | 0.45 | 0.71 | 0.23 | 0.00 | 0.15 | 0.93 | 0.04 | 0.44 | 0.04 | 0.73 | 0.06  | 0.35 | 0.10 | 0.37 | 0.69 | 0.67  |
| MEcyan           | 0.29  | 0.97  | 0.97  | 0.67 | 0.12  | 0.77  | 0.14 | 0.14 | 0.23 | 0.94   | 0.50  | 0.11 | 0.46 | 0.86 | 0.28 | 0.34 | 0.03 | 0.04 | 0.31 | 0.86 | 0.14 | 0.25  | 0.67 | 0.48 | 0.05 | 0.15 | 0.38  |
| MEdarkgreen      | 0.66  | 0.46  | 0.68  | 0.10 | 0.38  | 0.81  | 0.34 | 0.53 | 0.73 | 0.45   | 0.35  | 0.12 | 0.73 | 0.96 | 0.51 | 0.29 | 0.03 | 0.20 | 0.80 | 0.79 | 0.28 | 0.07  | 0.62 | 0.42 | 0.27 | 0.16 | 0.84  |
| MEdarkgrey       | 0.60  | 0.19  | 0.21  | 0.12 | 0.61  | 0.89  | 0.29 | 0.96 | 0.59 | 0.24   | 0.27  | 0.03 | 0.00 | 0.04 | 0.41 | 0.33 | 0.03 | 0.43 | 0.07 | 0.07 | 0.11 | 0.66  | 0.92 | 0.76 | 0.11 | 0.25 | 0.14  |
| MEdarkolivegreen | 0.44  | 0.89  | 0.55  | 0.74 | 0.12  | 0.41  | 0.31 | 0.43 | 0.77 | 0.40   | 0.78  | 0.88 | 0.26 | 0.89 | 0.09 | 0.56 | 0.73 | 0.30 | 0.35 | 0.37 | 0.53 | 0.32  | 0.40 | 0.77 | 0.19 | 0.84 | 0.72  |
| MEdarkorange     | 0.16  | 0.00  | 0.10  | 0.00 | 0.11  | 0.00  | 0.33 | 0.57 | 0.97 | 0.12   | 0.06  | 0.04 | 0.67 | 0.02 | 0.07 | 0.12 | 0.12 | 0.99 | 0.39 | 0.05 | 0.35 | 0.35  | 0.30 | 0.00 | 0.99 | 0.84 | 0.69  |
| MEdarkred        | 0.01  | 0.04  | 0.00  | 0.41 | 0.05  | 0.01  | 0.18 | 0.90 | 0.02 | 0.00   | 0.66  | 0.65 | 0.20 | 0.16 | 0.07 | 0.62 | 0.96 | 0.02 | 0.01 | 0.24 | 0.93 | 1.00  | 0.02 | 0.75 | 0.04 | 0.58 | 0.97  |
| MEdarkturquoise  | 0.14  | 1.00  | 0.37  | 0.83 | 0.02  | 0.19  | 0.17 | 0.13 | 0.73 | 0.23   | 0.74  | 0.54 | 0.42 | 0.91 | 0.03 | 0.28 | 0.93 | 0.22 | 0.62 | 0.10 | 0.83 | 0.07  | 0.29 | 0.84 | 0.01 | 0.49 | 0.72  |
| MEgreen          | 0.05  | 0.02  | 0.06  | 0.08 | 0.03  | 0.01  | 0.03 | 0.69 | 0.08 | 0.03   | 0.70  | 0.68 | 0.46 | 0.50 | 0.02 | 0.21 | 0.46 | 0.03 | 0.05 | 0.28 | 0.99 | 0.28  | 0.87 | 0.29 | 0.10 | 0.29 | 0.30  |
| MEgreenyellow    | 0.74  | 0.49  | 0.47  | 0.56 | 0.60  | 0.31  | 0.69 | 0.76 | 0.60 | 0.21   | 0.97  | 0.42 | 0.82 | 0.76 | 0.97 | 0.93 | 0.28 |      |      |      |      |       |      |      |      |      |       |

Additional file 12: Table S9F. Protein levels with gene module correlations, 72h infected  
 Infected, 72h protein vs. module correlation

| GT2            | CCL13 | CCL17 | CCL19 | CCL2  | CCL20 | CCL22 | CCL3  | CCL4  | CSF2  | CXCL10 | CXCL5 | IL10  | IL15  | IL16  | IL18  | IL1A  | IL18  | IL6   | IL7   | IL8   | MMP1  | MMP10 | MMP2  | MMP3  | MMP9  | TNF   | VEGFA |       |
|----------------|-------|-------|-------|-------|-------|-------|-------|-------|-------|--------|-------|-------|-------|-------|-------|-------|-------|-------|-------|-------|-------|-------|-------|-------|-------|-------|-------|-------|
| MEblack        | 0.07  | 0.25  | 0.25  | 0.22  | 0.14  | 0.22  | 0.34  | -0.06 | -0.21 | 0.32   | 0.06  | 0.06  | 0.03  | 0.24  | 0.04  | 0.27  | 0.33  | 0.25  | 0.32  | 0.17  | 0.15  | -0.06 | 0.03  | 0.16  | 0.30  | 0.38  | 0.11  |       |
| MEblue         | -0.02 | 0.02  | 0.01  | -0.14 | -0.09 | -0.18 | 0.06  | -0.20 | -0.26 | 0.17   | -0.12 | -0.15 | 0.05  | -0.12 | -0.13 | -0.12 | -0.03 | 0.04  | 0.08  | 0.09  | -0.13 | 0.03  | -0.10 | 0.04  | 0.03  | 0.03  | 0.07  | -0.21 |
| MEbrown        | -0.08 | -0.12 | 0.30  | 0.21  | 0.40  | 0.23  | 0.03  | 0.32  | 0.05  | 0.05   | -0.09 | 0.27  | -0.08 | -0.01 | 0.49  | 0.22  | 0.33  | 0.15  | -0.02 | 0.01  | 0.22  | -0.11 | 0.19  | 0.08  | 0.24  | -0.26 | 0.04  | 0.21  |
| MEcyan         | 0.00  | -0.28 | -0.17 | -0.06 | 0.05  | -0.13 | -0.29 | 0.17  | 0.32  | -0.27  | 0.00  | -0.04 | 0.01  | -0.16 | 0.09  | -0.15 | -0.15 | -0.14 | -0.38 | -0.21 | -0.05 | 0.01  | 0.05  | -0.01 | -0.13 | -0.22 | -0.27 | 0.12  |
| MEdarkgreen    | 0.09  | -0.09 | -0.18 | -0.02 | 0.15  | 0.02  | -0.16 | -0.06 | 0.30  | -0.16  | 0.04  | -0.15 | 0.21  | 0.05  | -0.28 | -0.02 | -0.17 | -0.02 | -0.12 | -0.17 | -0.15 | 0.07  | 0.00  | -0.21 | -0.26 | -0.01 | -0.11 | 0.22  |
| MEdarkgrey     | -0.21 | -0.47 | 0.00  | -0.30 | 0.11  | -0.39 | -0.34 | 0.07  | -0.11 | -0.07  | -0.42 | -0.01 | -0.06 | -0.57 | 0.03  | -0.14 | -0.11 | -0.37 | -0.09 | -0.18 | -0.05 | -0.01 | 0.01  | 0.07  | 0.08  | -0.73 | -0.36 | -0.23 |
| MEdarkolivegre | -0.17 | -0.34 | 0.02  | -0.16 | 0.08  | -0.31 | -0.22 | 0.22  | 0.04  | -0.21  | -0.11 | 0.20  | -0.32 | -0.36 | 0.16  | -0.33 | -0.19 | -0.31 | -0.30 | -0.09 | 0.09  | -0.32 | 0.07  | 0.14  | 0.11  | -0.51 | -0.37 | -0.24 |
| MEdarkorange   | 0.08  | 0.11  | -0.51 | -0.24 | -0.50 | -0.19 | -0.24 | -0.19 | 0.29  | -0.23  | 0.14  | -0.36 | 0.18  | 0.06  | -0.58 | -0.21 | -0.43 | -0.19 | -0.07 | -0.15 | -0.24 | 0.35  | -0.09 | -0.07 | -0.48 | 0.29  | -0.12 | -0.07 |
| MEdarkred      | 0.19  | 0.43  | 0.37  | 0.61  | 0.49  | 0.41  | 0.38  | 0.22  | 0.13  | 0.52   | 0.19  | 0.04  | 0.39  | 0.56  | 0.06  | 0.50  | 0.52  | 0.50  | 0.29  | 0.03  | 0.26  | -0.02 | 0.16  | -0.03 | 0.02  | 0.30  | 0.59  | 0.61  |
| MEdarkturquois | -0.05 | 0.11  | 0.10  | -0.10 | -0.07 | -0.10 | 0.09  | -0.15 | -0.32 | 0.25   | -0.13 | 0.05  | -0.02 | -0.06 | -0.10 | -0.09 | -0.03 | 0.01  | 0.23  | 0.14  | -0.06 | 0.06  | -0.04 | 0.07  | 0.09  | -0.13 | 0.10  | -0.30 |
| MEgreen        | 0.05  | 0.11  | -0.17 | -0.26 | -0.38 | -0.10 | 0.04  | -0.34 | -0.26 | -0.06  | 0.06  | -0.15 | 0.00  | 0.01  | -0.32 | -0.13 | -0.27 | -0.15 | 0.14  | 0.13  | -0.22 | 0.20  | -0.21 | -0.09 | -0.05 | 0.22  | -0.04 | -0.35 |
| MEgreenyellow  | -0.06 | -0.18 | 0.05  | -0.11 | 0.05  | -0.02 | -0.13 | 0.00  | -0.11 | 0.08   | -0.19 | 0.06  | 0.00  | -0.18 | 0.24  | -0.06 | -0.06 | -0.03 | -0.09 | 0.01  | -0.13 | 0.03  | -0.07 | -0.11 | 0.11  | -0.35 | -0.17 | -0.11 |
| MEgrey         | -0.28 | -0.43 | -0.17 | -0.54 | -0.23 | -0.60 | -0.40 | -0.25 | -0.23 | 0.05   | -0.62 | -0.34 | 0.18  | -0.71 | -0.16 | -0.51 | -0.37 | -0.05 | -0.30 | -0.01 | -0.50 | -0.01 | -0.15 | -0.01 | -0.15 | -0.75 | -0.37 | -0.42 |
| MEgrey60       | 0.04  | 0.15  | -0.04 | 0.00  | -0.22 | 0.03  | 0.19  | 0.08  | -0.04 | -0.17  | 0.43  | 0.23  | -0.46 | 0.13  | -0.24 | -0.05 | -0.13 | -0.34 | 0.20  | 0.01  | 0.30  | -0.24 | 0.07  | 0.22  | 0.11  | 0.39  | -0.06 | -0.29 |
| MElightcyan    | 0.03  | 0.12  | -0.12 | -0.23 | -0.25 | -0.11 | 0.00  | -0.52 | -0.34 | 0.24   | -0.28 | -0.35 | 0.43  | -0.03 | -0.24 | -0.06 | -0.14 | 0.20  | 0.12  | 0.15  | -0.48 | 0.42  | -0.28 | -0.25 | -0.15 | 0.00  | 0.13  | -0.16 |
| MElightgreen   | -0.08 | -0.14 | -0.10 | -0.35 | -0.35 | -0.26 | 0.04  | -0.41 | -0.38 | 0.22   | -0.35 | -0.26 | 0.15  | -0.44 | -0.23 | -0.29 | -0.24 | -0.01 | 0.06  | 0.03  | -0.41 | 0.20  | -0.15 | -0.04 | 0.03  | -0.10 | -0.15 | -0.42 |
| MElightyellow  | 0.00  | -0.01 | -0.31 | -0.02 | -0.15 | -0.05 | -0.27 | 0.16  | 0.47  | -0.40  | 0.17  | -0.11 | 0.02  | 0.08  | -0.24 | -0.08 | -0.27 | -0.21 | -0.26 | -0.17 | 0.00  | -0.01 | 0.03  | -0.08 | -0.33 | 0.05  | -0.24 | 0.18  |
| MEmagenta      | -0.06 | -0.17 | 0.07  | 0.04  | 0.15  | 0.02  | -0.10 | 0.31  | 0.14  | -0.20  | 0.05  | 0.25  | -0.25 | -0.09 | 0.23  | -0.04 | -0.01 | -0.17 | -0.15 | -0.07 | 0.19  | -0.19 | 0.13  | 0.10  | 0.14  | -0.25 | -0.22 | 0.00  |
| MEmidnightblu  | -0.11 | 0.11  | 0.29  | 0.36  | 0.30  | 0.12  | 0.30  | 0.43  | 0.12  | 0.01   | 0.41  | 0.41  | -0.49 | 0.24  | 0.12  | 0.15  | 0.26  | -0.13 | 0.08  | -0.01 | 0.64  | -0.56 | 0.27  | 0.28  | 0.25  | 0.17  | 0.09  | 0.18  |
| MEorange       | -0.06 | -0.02 | 0.11  | 0.20  | 0.29  | 0.15  | -0.07 | 0.17  | 0.19  | 0.10   | -0.15 | 0.14  | 0.14  | 0.08  | 0.29  | 0.15  | 0.20  | 0.18  | -0.07 | -0.04 | 0.08  | 0.07  | 0.12  | -0.06 | -0.02 | -0.25 | 0.09  | 0.29  |
| MEpaleturquois | -0.19 | -0.42 | 0.05  | -0.27 | 0.10  | -0.38 | -0.19 | 0.30  | -0.10 | -0.35  | -0.01 | 0.24  | -0.62 | -0.43 | 0.25  | -0.38 | -0.17 | -0.45 | -0.30 | -0.01 | 0.21  | -0.39 | 0.05  | 0.33  | 0.00  | -0.39 | -0.42 | -0.44 |
| MEpink         | 0.09  | 0.36  | 0.27  | 0.31  | 0.16  | 0.29  | 0.41  | -0.26 | -0.27 | 0.71   | -0.23 | -0.11 | 0.51  | 0.27  | 0.01  | 0.37  | 0.43  | 0.58  | 0.45  | 0.18  | -0.09 | 0.19  | -0.03 | -0.12 | 0.04  | 0.27  | 0.61  | 0.24  |
| MEpurple       | 0.22  | 0.20  | -0.33 | -0.07 | -0.36 | 0.05  | -0.01 | -0.25 | 0.12  | 0.09   | 0.15  | -0.37 | 0.28  | 0.20  | -0.40 | 0.05  | -0.17 | 0.05  | 0.08  | -0.07 | -0.24 | 0.32  | -0.13 | -0.14 | -0.31 | 0.49  | 0.08  | 0.09  |
| MEred          | -0.02 | 0.09  | 0.09  | -0.03 | -0.05 | -0.08 | 0.18  | 0.01  | -0.22 | 0.06   | 0.15  | 0.15  | -0.32 | 0.00  | -0.10 | -0.09 | -0.02 | -0.16 | 0.17  | 0.09  | 0.19  | -0.22 | 0.02  | 0.20  | 0.18  | 0.14  | 0.03  | -0.29 |
| MEroyalblue    | -0.06 | -0.03 | 0.14  | 0.09  | 0.15  | -0.13 | 0.07  | 0.22  | 0.04  | 0.13   | 0.09  | 0.15  | -0.27 | -0.05 | 0.00  | -0.08 | 0.12  | -0.05 | 0.02  | -0.06 | 0.30  | -0.34 | 0.18  | 0.29  | 0.08  | -0.07 | 0.05  | -0.03 |
| MEsaddlebrow   | 0.00  | 0.34  | 0.20  | 0.34  | 0.09  | 0.21  | 0.25  | -0.09 | -0.13 | 0.46   | -0.14 | 0.00  | 0.23  | 0.22  | -0.12 | 0.32  | 0.37  | 0.42  | 0.26  | 0.11  | 0.08  | -0.07 | 0.03  | -0.06 | -0.04 | 0.01  | 0.33  | 0.40  |
| MEsalmon       | 0.10  | 0.12  | -0.28 | -0.06 | -0.34 | -0.13 | 0.02  | -0.03 | 0.19  | -0.18  | 0.37  | -0.08 | -0.17 | 0.12  | -0.47 | -0.15 | -0.26 | -0.27 | 0.02  | -0.11 | 0.10  | -0.08 | 0.03  | 0.13  | -0.21 | 0.43  | -0.07 | -0.12 |
| MEskyblue      | -0.08 | 0.00  | 0.27  | 0.16  | 0.26  | 0.22  | 0.13  | 0.18  | -0.12 | -0.06  | 0.08  | 0.46  | -0.32 | 0.08  | 0.38  | 0.15  | 0.17  | -0.09 | 0.06  | 0.11  | 0.28  | -0.14 | 0.08  | 0.04  | 0.32  | -0.13 | -0.01 | -0.04 |
| MEsteelblue    | -0.16 | -0.09 | 0.29  | 0.05  | 0.19  | -0.08 | 0.17  | 0.22  | -0.23 | 0.05   | 0.11  | 0.47  | -0.58 | -0.14 | 0.21  | -0.11 | 0.10  | -0.24 | 0.09  | 0.06  | 0.41  | -0.46 | 0.14  | 0.30  | 0.40  | -0.18 | -0.08 | -0.31 |
| MEtan          | 0.22  | 0.61  | 0.47  | 0.76  | 0.47  | 0.70  | 0.55  | 0.06  | 0.01  | 0.61   | 0.18  | 0.27  | 0.34  | 0.76  | 0.24  | 0.74  | 0.64  | 0.53  | 0.16  | 0.36  | 0.00  | 0.10  | -0.17 | 0.10  | 0.43  | 0.78  | 0.66  | 0.66  |
| MEturquoise    | 0.13  | 0.09  | -0.20 | 0.03  | -0.16 | 0.10  | -0.15 | -0.08 | 0.28  | -0.09  | 0.06  | -0.18 | 0.31  | 0.15  | -0.21 | 0.04  | -0.15 | 0.05  | -0.05 | -0.12 | -0.19 | 0.26  | 0.00  | -0.21 | -0.30 | 0.06  | -0.04 | 0.25  |
| MEviolet       | -0.26 | -0.45 | 0.01  | -0.27 | 0.15  | -0.28 | -0.28 | 0.26  | 0.06  | -0.34  | -0.11 | -0.15 | -0.35 | -0.42 | 0.32  | -0.33 | -0.17 | -0.34 | -0.37 | -0.03 | 0.06  | -0.21 | 0.06  | 0.17  | 0.18  | -0.44 | -0.39 | -0.34 |
| MEwhite        | -0.16 | -0.30 | 0.21  | -0.06 | 0.24  | -0.07 | -0.03 | 0.35  | -0.11 | -0.30  | 0.05  | 0.36  | -0.55 | -0.26 | 0.39  | -0.10 | 0.03  | -0.28 | -0.18 | 0.04  | 0.28  | -0.44 | 0.07  | 0.21  | 0.39  | -0.29 | -0.30 | -0.26 |
| MEyellow       | -0.18 | -0.26 | 0.37  | 0.11  | 0.45  | 0.00  | 0.04  | 0.40  | -0.07 | 0.02   | -0.09 | 0.38  | -0.37 | -0.23 | 0.52  | 0.01  | 0.28  | -0.03 | -0.12 | 0.02  | 0.34  | -0.41 | 0.20  | 0.25  | 0.40  | -0.41 | -0.09 | -0.02 |

Infected, 72h protein vs. module correlation p value

| GT2            | CCL13 | CCL17 | CCL19 | CCL2 | CCL20 | CCL22 | CCL3 | CCL4 | CSF2 | CXCL10 | CXCL5 | IL10 | IL15 | IL16 | IL18 | IL1A | IL18 | IL6  | IL7  | IL8  | MMP1 | MMP10 | MMP2 | MMP3 | MMP9 | TNF  | VEGFA |      |
|----------------|-------|-------|-------|------|-------|-------|------|------|------|--------|-------|------|------|------|------|------|------|------|------|------|------|-------|------|------|------|------|-------|------|
| MEblack        | 0.74  | 0.21  | 0.22  | 0.29 | 0.50  | 0.29  | 0.09 | 0.79 | 0.29 | 0.11   | 0.77  | 0.79 | 0.88 | 0.24 | 0.84 | 0.18 | 0.10 | 0.23 | 0.11 | 0.40 | 0.46 | 0.78  | 0.89 | 0.77 | 0.45 | 0.14 | 0.06  | 0.60 |
| MEblue         | 0.93  | 0.94  | 0.98  | 0.48 | 0.65  | 0.39  | 0.76 | 0.32 | 0.20 | 0.42   | 0.56  | 0.46 | 0.80 | 0.57 | 0.52 | 0.56 | 0.87 | 0.86 | 0.71 | 0.67 | 0.51 | 0.89  | 0.61 | 0.85 | 0.90 | 0.89 | 0.73  | 0.31 |
| MEbrown        | 0.71  | 0.56  | 0.14  | 0.31 | 0.04  | 0.26  | 0.89 | 0.11 | 0.80 | 0.81   | 0.67  | 0.18 | 0.69 | 0.95 | 0.01 | 0.29 | 0.09 | 0.48 | 0.91 | 0.96 | 0.29 | 0.61  | 0.36 | 0.71 | 0.23 | 0.20 | 0.84  | 0.29 |
| MEcyan         | 0.99  | 0.17  | 0.41  | 0.76 | 0.82  | 0.53  | 0.15 | 0.40 | 0.11 | 0.18   | 0.99  | 0.86 | 0.96 | 0.43 | 0.66 | 0.46 | 0.45 | 0.51 | 0.05 | 0.30 | 0.82 | 0.95  | 0.79 | 0.96 | 0.53 | 0.29 | 0.18  | 0.57 |
| MEdarkgreen    | 0.65  | 0.67  | 0.37  | 0.92 | 0.46  | 0.94  | 0.45 | 0.78 | 0.14 | 0.43   | 0.84  | 0.46 | 0.31 | 0.80 | 0.68 | 0.92 | 0.40 | 0.92 | 0.55 | 0.40 | 0.46 | 0.73  | 0.99 | 0.31 | 0.19 | 0.96 | 0.60  | 0.28 |
| MEdarkgrey     | 0.30  | 0.02  | 0.99  | 0.14 | 0.60  | 0.05  | 0.09 | 0.73 | 0.61 | 0.73   | 0.03  | 0.98 | 0.76 | 0.00 | 0.25 | 0.08 | 0.48 | 0.59 | 0.06 | 0.66 | 0.37 | 0.80  | 0.95 | 0.72 | 0.69 | 0.00 | 0.07  | 0.25 |
| MEdarkolivegre | 0.41  | 0.09  | 0.92  | 0.45 | 0.69  | 0.13  | 0.27 | 0.29 | 0.86 | 0.31   | 0.58  | 0.33 | 0.11 | 0.07 | 0.42 | 0.10 | 0.35 | 0.13 | 0.14 | 0.66 | 0.67 | 0.11  | 0.74 | 0.50 | 0.60 | 0.01 | 0.06  | 0.24 |
| MEdarkorange   | 0.70  | 0.60  | 0.01  | 0.23 | 0.01  | 0.35  | 0.25 | 0.34 | 0.15 | 0.27   | 0.49  | 0.07 | 0.39 | 0.76 | 0.00 | 0.30 | 0.03 | 0.36 | 0.72 | 0.46 | 0.23 | 0.08  | 0.66 | 0.73 | 0.01 | 0.16 | 0.55  | 0.72 |
| MEdarkred      | 0.36  | 0.03  | 0.06  | 0.00 | 0.01  | 0.04  | 0.05 | 0.28 | 0.54 | 0.01   | 0.36  | 0.86 | 0.05 | 0.00 | 0.77 | 0.01 | 0.01 | 0.01 | 0.15 | 0.87 | 0.19 | 0.93  | 0.44 | 0.89 | 0.94 | 0.13 | 0.00  | 0.00 |
| MEdarkturquois | 0.80  | 0.58  | 0.62  | 0.62 | 0.73  | 0.61  | 0.67 | 0.45 | 0.11 | 0.22   | 0.52  | 0.82 | 0.93 | 0.78 | 0.62 | 0.65 | 0.88 | 0.95 | 0.26 | 0.50 | 0.78 | 0.78  | 0.84 | 0.72 | 0.68 | 0.53 | 0.62  | 0.13 |
| MEgreen        | 0.81  |       |       |      |       |       |      |      |      |        |       |      |      |      |      |      |      |      |      |      |      |       |      |      |      |      |       |      |
