# Supplementary material for: Human alveolar macrophage response to Mycobacterium tuberculosis: immune characteristics underlying large inter-individual variability
Source: Research Square preprint supplement (doi:10.21203/rs.3.rs-2986649/v1), 2023-06-08
Supplement: Supplementary file 3 [file 3f2846ddfbe7f7cedd6172b8.pdf]

Table 6. Gene module membership and correlation with growth rate (48/72h), with adjusted p values for each module

Additional file 9: Table S6A. Network module gene membership and correlations between RNA expression (log2 RPMs) at 2, 24 and 72h in infected cells, and *M.tb* generation times (aka RLU ratios, growth rates, 48-72h) in *M.tb* infected and control AMs

| Network Module Membership - 24hr |        |          |          | Network Module Membership - 24hr |        |              |             | Network Module Membership - 72hr |        |          |          |
|----------------------------------|--------|----------|----------|----------------------------------|--------|--------------|-------------|----------------------------------|--------|----------|----------|
| GeneID                           | Module | COR      | Pval     | GeneID                           | Module | COR          | Pval        | GeneID                           | Module | COR      | Pval     |
| PCCB                             | black  | -0.5779  | 0.001989 | RASSF2                           | black  | -0.729181847 | 1.59971E-05 | DGKA                             | black  | -0.37093 | 0.062103 |
| ABHD16B                          | black  | 0.53643  | 0.004727 | PDCD6IP                          | black  | -0.685350601 | 7.98935E-05 | SHISA4                           | black  | -0.35935 | 0.071389 |
| PEX19                            | black  | -0.53397 | 0.00496  | PHF21A                           | black  | -0.675323488 | 0.000111611 | LOC50643                         | black  | -0.33861 | 0.090631 |
| HAUS7                            | black  | -0.49485 | 0.010167 | MARK4                            | black  | -0.611263324 | 0.000705987 | NMT2                             | black  | -0.2992  | 0.137589 |
| HECA                             | black  | 0.465064 | 0.016669 | C17orf80                         | black  | -0.603885183 | 0.000851902 | ACTR6                            | black  | -0.28984 | 0.150926 |
| ATP5J2                           | black  | -0.42764 | 0.029318 | STAR7D                           | black  | -0.601455907 | 0.000905362 | TEFM                             | black  | -0.28599 | 0.156671 |
| SNORA70G                         | black  | 0.426341 | 0.029865 | CLECSA                           | black  | -0.593389197 | 0.001104342 | PAFAH1B1                         | black  | -0.25777 | 0.203598 |
| IMMT                             | black  | -0.42047 | 0.032451 | CAMTA2                           | black  | -0.585320655 | 0.001340223 | DISP1                            | black  | -0.24828 | 0.221333 |
| SRI                              | black  | -0.41897 | 0.033137 | TMUB1                            | black  | -0.568501855 | 0.001975229 | FGFR1OP                          | black  | -0.24783 | 0.222198 |
| C17orf75                         | black  | -0.41461 | 0.035206 | MCRS1                            | black  | -0.556015551 | 0.002600385 | YARS2                            | black  | -0.24457 | 0.228544 |
| COX18                            | black  | -0.41136 | 0.036815 | PSMC5                            | black  | -0.551980055 | 0.002835674 | PSKH1                            | black  | -0.24204 | 0.233541 |
| NLRP2                            | black  | -0.40299 | 0.041225 | GOT2                             | black  | -0.542645797 | 0.003450692 | CASD1                            | black  | -0.24127 | 0.235072 |
| PLGRKT                           | black  | -0.39689 | 0.044692 | MRP57                            | black  | -0.541055872 | 0.003566043 | CORO1A                           | black  | -0.24006 | 0.237513 |
| TANC2                            | black  | 0.394104 | 0.046352 | UTP14C                           | black  | -0.527922804 | 0.004651101 | FAM20A                           | black  | -0.23273 | 0.252567 |
| IFIH1                            | black  | -0.38907 | 0.049474 | ATN1                             | black  | -0.527223272 | 0.004716001 | GPX4                             | black  | -0.22653 | 0.26578  |
| FLYWCH2                          | black  | -0.37902 | 0.056193 | TTBK2                            | black  | -0.523684853 | 0.005056189 | SUB1                             | black  | -0.22646 | 0.265943 |
| PANK3                            | black  | 0.378379 | 0.056646 | HSD17B10                         | black  | -0.514147822 | 0.00607832  | EBNA1BP2                         | black  | -0.21802 | 0.284644 |
| EXOSC10                          | black  | -0.37771 | 0.057124 | PSME3                            | black  | -0.511263523 | 0.00641984  | PSME2                            | black  | -0.21132 | 0.300057 |
| PDXDC2P                          | black  | 0.374228 | 0.05964  | MSANTD4                          | black  | -0.511109338 | 0.006438543 | FBXO46                           | black  | -0.20945 | 0.304453 |
| INIP                             | black  | -0.36617 | 0.065802 | NDUFA11                          | black  | -0.510555605 | 0.006506092 | ACRBP                            | black  | -0.20391 | 0.317731 |
| REV3L                            | black  | -0.35986 | 0.070964 | PLEKHM2                          | black  | -0.509926555 | 0.006583553 | GTF3C3                           | black  | -0.19683 | 0.335168 |
| NAAS0                            | black  | 0.359553 | 0.071218 | VTI1B                            | black  | -0.504540428 | 0.007279213 | GLO1                             | black  | -0.1962  | 0.336762 |
| ZMPSTE24                         | black  | -0.35651 | 0.073818 | SLC39A13                         | black  | -0.500363388 | 0.007860386 | HIST1H31                         | black  | -0.19579 | 0.337774 |
| GNP3                             | black  | -0.35556 | 0.074647 | CCZ1B                            | black  | -0.498711623 | 0.008100716 | TMEM192                          | black  | -0.19401 | 0.342284 |
| NDUF52                           | black  | -0.3538  | 0.076203 | USO1                             | black  | -0.495910299 | 0.008522401 | CD36                             | black  | -0.19347 | 0.343655 |
| IGIP                             | black  | 0.352256 | 0.077582 | ACTL6A                           | black  | -0.495529398 | 0.008581135 | GNL2                             | black  | -0.19178 | 0.347954 |
| NECAP2                           | black  | -0.35219 | 0.077641 | NUP85                            | black  | -0.495380778 | 0.008604143 | HIST1H2BE                        | black  | -0.19175 | 0.348049 |
| CRK                              | black  | 0.349685 | 0.079924 | FLYWCH1                          | black  | -0.494508224 | 0.008740272 | HIST1H4J                         | black  | -0.19138 | 0.348992 |
| STAT1                            | black  | -0.34826 | 0.081244 | ORAI2                            | black  | -0.493577347 | 0.008887486 | ATP6V1C1                         | black  | -0.19129 | 0.349231 |
| MB21D1                           | black  | -0.34739 | 0.082057 | ARAP1                            | black  | -0.489322634 | 0.009587057 | CRYZL1                           | black  | -0.1906  | 0.350998 |
| IMPDH2                           | black  | 0.346712 | 0.0827   | HLA-F                            | black  | -0.489143919 | 0.009617421 | ACAA2                            | black  | -0.17561 | 0.390829 |
| SIGLEC7                          | black  | -0.34399 | 0.085305 | SH2B3                            | black  | -0.484679869 | 0.010402377 | MRPS23                           | black  | -0.17392 | 0.395478 |
| ASTE1                            | black  | 0.343234 | 0.086038 | CAPN2                            | black  | -0.484360645 | 0.010460499 | ASUN                             | black  | -0.17342 | 0.396878 |
| FNTA                             | black  | -0.34235 | 0.086901 | METRNL                           | black  | -0.481887876 | 0.010919963 | SMC6                             | black  | -0.17228 | 0.400012 |
| STAT2                            | black  | -0.34169 | 0.087549 | CTPS1                            | black  | -0.480671889 | 0.011152001 | EVIS                             | black  | -0.1711  | 0.403316 |
| AP151                            | black  | -0.33993 | 0.089301 | RPUSO3                           | black  | -0.479853135 | 0.01131054  | VDAC3                            | black  | -0.17074 | 0.404325 |
| SLC25A38                         | black  | -0.33809 | 0.091157 | RTFDC1                           | black  | -0.476848939 | 0.011908421 | DYM                              | black  | -0.16852 | 0.41055  |
| RAN                              | black  | -0.33309 | 0.09636  | RRAS                             | black  | -0.47595693  | 0.012090922 | TRIAP1                           | black  | -0.16818 | 0.411499 |
| C18orf32                         | black  | -0.33188 | 0.097645 | NFKBIE                           | black  | -0.474708999 | 0.012350138 | ANAPC1                           | black  | -0.16722 | 0.414223 |
| CDC84                            | black  | -0.3292  | 0.100554 | LATS2                            | black  | -0.471586694 | 0.01301898  | HEATR1                           | black  | -0.16704 | 0.414738 |
| FOXO3                            | black  | 0.327727 | 0.102175 | MIDN                             | black  | -0.470940996 | 0.01316098  | ZNF830                           | black  | -0.16635 | 0.416671 |
| CDK14                            | black  | 0.326406 | 0.103647 | SRSF2                            | black  | -0.470565781 | 0.013244085 | FAM175B                          | black  | -0.16259 | 0.427455 |
| RRN3P2                           | black  | -0.3263  | 0.103765 | METTL2B                          | black  | -0.464564738 | 0.014633469 | DTWDD2                           | black  | -0.16257 | 0.427494 |
| SSR2                             | black  | -0.32601 | 0.104094 | HIST2H2AC                        | black  | -0.464390607 | 0.014675517 | ENOPH1                           | black  | -0.16223 | 0.428488 |
| UBE2Q2                           | black  | -0.32587 | 0.10425  | ARMCX3                           | black  | -0.462455238 | 0.01514961  | HINT3                            | black  | -0.16182 | 0.429658 |
| FAM136A                          | black  | -0.32515 | 0.105067 | COP55                            | black  | -0.461137331 | 0.015479632 | H2FAFZ                           | black  | -0.1562  | 0.44607  |
| NR4A3                            | black  | 0.325033 | 0.105193 | KIAA0240                         | black  | -0.457582141 | 0.016399606 | HIST1H2AC                        | black  | -0.15475 | 0.450353 |
| ZMAT2                            | black  | -0.32498 | 0.105249 | TIMM13                           | black  | -0.454316289 | 0.017283958 | LYST                             | black  | -0.15273 | 0.456342 |
| GGCT                             | black  | -0.32498 | 0.105256 | MAP3K11                          | black  | -0.453765155 | 0.017436996 | RCCIP                            | black  | -0.15117 | 0.46103  |
| UPRT                             | black  | 0.324527 | 0.105767 | ARRB1                            | black  | -0.452241262 | 0.017865598 | KIAA0922                         | black  | -0.15062 | 0.462685 |
| PAPD5                            | black  | -0.3235  | 0.106938 | GLUL                             | black  | -0.451741576 | 0.018008489 | PPIA                             | black  | -0.15006 | 0.464354 |
| TAF1C                            | black  | -0.3211  | 0.109719 | TRIM27                           | black  | -0.451150626 | 0.018178255 | CLCN3                            | black  | -0.14856 | 0.468891 |
| ZNF264                           | black  | 0.320641 | 0.110256 | SRSF4                            | black  | -0.450512962 | 0.018362914 | C2orf47                          | black  | -0.14667 | 0.474619 |
| BET1L                            | black  | -0.32023 | 0.11074  | RNP51                            | black  | -0.450400877 | 0.018395531 | ZNF654                           | black  | -0.14291 | 0.486156 |
| HADHB                            | black  | 0.319672 | 0.111398 | NACC1                            | black  | -0.447082573 | 0.019382921 | DYNC2L1                          | black  | -0.14009 | 0.494873 |
| HIST1H4D                         | black  | -0.31959 | 0.111496 | CDKN1B                           | black  | -0.445044337 | 0.020010657 | RILPL2                           | black  | -0.13973 | 0.496002 |
| USP30                            | black  | -0.31682 | 0.114811 | ABR                              | black  | -0.440311358 | 0.021532678 | WDR75                            | black  | -0.13841 | 0.500132 |
| RLIM                             | black  | 0.31567  | 0.116201 | RIC8A                            | black  | -0.440241372 | 0.021555874 | PPM1F                            | black  | -0.13758 | 0.502713 |
| DAXX                             | black  | -0.31476 | 0.117315 | APLP2                            | black  | -0.440032459 | 0.021625235 | ABCE1                            | black  | -0.13637 | 0.506517 |
| SYNCRIP                          | black  | 0.313559 | 0.118796 | TUBB                             | black  | -0.438776721 | 0.022046004 | ITGB2                            | black  | -0.13603 | 0.507576 |
| BUD31                            | black  | -0.31209 | 0.12063  | RAC1                             | black  | -0.438294063 | 0.022209498 | RHEB                             | black  | -0.13468 | 0.511841 |
| ARHGEF3                          | black  | -0.31016 | 0.123067 | PLEKHJ1                          | black  | -0.435678296 | 0.023112846 | SLC25A24                         | black  | -0.12969 | 0.527745 |
| FHIT                             | black  | -0.30853 | 0.125152 | GTF2H4                           | black  | -0.429926539 | 0.025204653 | GNA15                            | black  | -0.12958 | 0.528097 |
| POM121                           | black  | -0.30491 | 0.129866 | CTTNBP2NL                        | black  | -0.428705259 | 0.025668007 | MRPL40                           | black  | -0.12718 | 0.535844 |
| RAB8A                            | black  | -0.30267 | 0.132859 | COPA                             | black  | -0.427991594 | 0.025941955 | MGC72080                         | black  | -0.12635 | 0.538515 |
| MRPL17                           | black  | -0.29781 | 0.139516 | C12orf10                         | black  | -0.4272586   | 0.026225785 | VPS8                             | black  | -0.12527 | 0.542016 |
| ALKBH7                           | black  | -0.29734 | 0.140171 | FGD3                             | black  | -0.427101149 | 0.026286948 | KIAA0368                         | black  | -0.12516 | 0.542374 |
| COMM4D                           | black  | -0.29545 | 0.142822 | NUP155                           | black  | -0.426626733 | 0.026472473 | FBXO3                            | black  | -0.12319 | 0.548797 |
| CBX5                             | black  | -0.29535 | 0.142962 | SBF1                             | black  | -0.425516827 | 0.026910343 | DBI                              | black  | -0.1227  | 0.550428 |
| OXAL1                            | black  | -0.29414 | 0.144691 | BRF1                             | black  | -0.423372485 | 0.027772917 | TMED4                            | black  | -0.1212  | 0.555322 |
| PPP2R5B                          | black  | -0.29083 | 0.149473 | RELA                             | black  | -0.423184625 | 0.027849538 | AGPS                             | black  | -0.12013 | 0.558843 |
| LETMD1                           | black  | -0.28675 | 0.155525 | RNH1                             | black  | -0.421564307 | 0.028517523 | PSME1                            | black  | -0.11902 | 0.562524 |
| GLT2SD1                          | black  | -0.28648 | 0.155933 | ERGI1                            | black  | -0.420127688 | 0.029120549 | ERMP1                            | black  | -0.11597 | 0.572633 |
| XAB2                             | black  | -0.28607 | 0.156559 | RELT                             | black  | -0.418676007 | 0.029740311 | TIMM21                           | black  | -0.11251 | 0.584242 |
| RASA3                            | black  | 0.285444 | 0.157506 | FBXO7                            | black  | -0.417280531 | 0.030346063 | PTCD3                            | black  | -0.10487 | 0.610162 |
| HNRNPA2B1                        | black  | -0.2845  | 0.158937 | RNF185                           | black  | -0.415723454 | 0.031033659 | UBR4                             | black  | -0.10468 | 0.610814 |
| PRPF18                           | black  | -0.28331 | 0.160763 | HNRNPUL2                         | black  | -0.415081505 | 0.031320766 | CYTH2                            | black  | -0.10454 | 0.611294 |
| TRAPPPC12                        | black  | -0.28316 | 0.161001 | SDF2L1                           | black  | -0.414075671 | 0.031774913 | FAM110A                          | black  | -0.10423 | 0.612371 |
| TLR1                             | black  | -0.28202 | 0.162763 | LRFN4                            | black  | -0.413847392 | 0.031878717 | MED6                             | black  | -0.09914 | 0.62992  |
| CAPRN2                           | black  | 0.279279 | 0.167068 | PPP1R35                          | black  | -0.412385579 | 0.032549926 | CKNK                             | black  | -0.09774 | 0.634765 |
| TRAF7                            | black  | -0.27926 | 0.16709  | FCGR2                            | black  | -0.412307403 | 0.032586139 | KCTD17                           | black  | -0.09708 | 0.637071 |
| IKZF1                            | black  | -0.27882 | 0.167795 | CCDC127                          | black  | -0.411877624 | 0.0327858   | CD40                             | black  | -0.09622 | 0.640085 |
| VIM                              | black  | -0.27736 | 0.170131 | COX8A                            | black  | -0.411384781 | 0.033015966 | HIST1H2BD                        | black  | -0.09255 | 0.652947 |
| ZDHHC6                           | black  | -0.27514 | 0.173716 | SARS                             | black  | -0.411101713 | 0.03314875  | COG6                             | black  | -0.09076 | 0.65926  |
| FKRP                             | black  | -0.27477 | 0.174307 | EZR                              | black  | -0.40734161  | 0.034953576 | NRAS                             | black  | -0.09052 | 0.660089 |
| CC2D1B                           | black  | -0.27387 | 0.175795 | USB1                             | black  | -0.406152258 | 0.035540557 | MAP15                            | black  | -0.08922 | 0.66472  |
| KDSR                             | black  | 0.273607 | 0.176219 | MAP15                            | black  | -0.405642323 | 0.03579463  | INTS7                            | black  | -0.08722 | 0.671814 |
| SPOP                             | black  | -0.26975 | 0.18263  | TRADD                            | black  | -0.398503088 | 0.039506686 | EPNS                             | black  | -0.08649 | 0.674416 |
| DMAP1                            | black  | -0.26967 | 0.182771 | AHNAK                            | black  | -0.397632702 | 0.03997946  | ANO10                            | black  | -0.08536 | 0.678434 |
| RBM42                            | black  | -0.26926 | 0.183466 | GNPTG                            | black  | -0.396456539 | 0.040625464 | ACE                              | black  | -0.08014 | 0.697158 |
| TMEM116                          | black  | -0.26865 | 0.184491 | ENTPD6                           | black  | -0.395424051 | 0.041199371 | IER3IP1                          | black  | -0.07783 | 0.70549  |
| S100A11                          | black  | -0.26689 | 0.187494 | ZC3H3                            | black  | -0.394383992 | 0.041783982 | UTP3                             | black  | -0.07547 | 0.714041 |
| PIPL4                            | black  | -0.26588 | 0.189243 | CD37                             | black  | -0.394023348 | 0.          |                                  |        |          |          |

































































































































Table 6. Gene module membership and correlation with growth rate (48/72h), with adjusted p values for each module

|           |     |          |          |           |        |               |             |           |        |          |          |
|-----------|-----|----------|----------|-----------|--------|---------------|-------------|-----------|--------|----------|----------|
| PTPN11    | red | -0.29802 | 0.139221 | TRIM37    | purple | -0.019728728  | 0.922192814 | POM121C   | salmon | -0.07696 | 0.708642 |
| HERC2     | red | 0.297677 | 0.139694 | RNF168    | purple | -0.018981152  | 0.925132847 | MNF1      | salmon | -0.07552 | 0.713869 |
| PRPF19    | red | -0.29763 | 0.139754 | TNRC6C    | purple | -0.018448722  | 0.927227354 | RFC4      | salmon | -0.07342 | 0.721497 |
| XRCC1     | red | 0.297551 | 0.139869 | TRNT1     | purple | -0.016285488  | 0.935741932 | PSENE1    | salmon | -0.07116 | 0.729769 |
| TBC1D15   | red | -0.29682 | 0.140899 | FARP1     | purple | -0.015881773  | 0.937331762 | TAX1BP3   | salmon | -0.06883 | 0.738316 |
| HNRPL     | red | -0.29633 | 0.141577 | HELB      | purple | -0.011871289  | 0.95313684  | FAM20C    | salmon | -0.06681 | 0.745714 |
| SPPL2B    | red | 0.294896 | 0.14361  | ZNF322    | purple | -0.0106655275 | 0.95789332  | ZNF416    | salmon | -0.06492 | 0.752699 |
| DERA      | red | -0.29419 | 0.144623 | GNAI3     | purple | -0.009853404  | 0.961096115 | CRTC3     | salmon | -0.06139 | 0.765766 |
| ANKRD42   | red | -0.29395 | 0.144965 | HSCB      | purple | -0.006710048  | 0.973501644 | SLC30A7   | salmon | -0.06111 | 0.766801 |
| SESN1     | red | -0.29379 | 0.145191 | ATPAF1    | purple | -0.005064148  | 0.979999908 | THUMP1D1  | salmon | -0.06073 | 0.768202 |
| NCOA7     | red | 0.292831 | 0.146568 | APOC1     | purple | -0.002527123  | 0.990018771 | APIP      | salmon | -0.05945 | 0.77297  |
| ERP29     | red | -0.2927  | 0.14675  | ANAPC10   | purple | -0.001846363  | 0.992707444 | ZNF14     | salmon | -0.0587  | 0.775765 |
| RNF115    | red | -0.29198 | 0.147803 | DYNLT3    | purple | 0.001754319   | 0.993070982 | EIF2S1    | salmon | -0.05385 | 0.793897 |
| ALG5      | red | -0.29156 | 0.148416 | PLXNA1    | purple | 0.004410716   | 0.982580125 | RNF169    | salmon | -0.05262 | 0.798489 |
| STK39     | red | -0.29093 | 0.149331 | MRPL50    | purple | 0.005347761   | 0.978880063 | UXT       | salmon | -0.05199 | 0.800878 |
| UVRAG     | red | -0.29085 | 0.149439 | HAUS2     | purple | 0.017486275   | 0.931014673 | LSM14A    | salmon | -0.05096 | 0.804729 |
| TMEM131   | red | -0.29074 | 0.149602 | TMEM164   | purple | 0.018758381   | 0.926009138 | PEBP1     | salmon | -0.04373 | 0.832006 |
| TMEM219   | red | 0.290201 | 0.150397 | WRN       | purple | 0.024677103   | 0.902758998 | ALOX5AP   | salmon | -0.03461 | 0.866705 |
| SLC22A15  | red | -0.28887 | 0.152366 | LSG1      | purple | 0.028272268   | 0.888673249 | NIPSNAP1  | salmon | -0.026   | 0.899654 |
| C18orf25  | red | 0.288193 | 0.15337  | PSMG1     | purple | 0.028386593   | 0.888225847 | COX5B     | salmon | -0.0241  | 0.906953 |
| TTC37     | red | -0.28751 | 0.154391 | RPL7      | purple | 0.029813055   | 0.88264633  | PET100    | salmon | -0.02217 | 0.914396 |
| LANCL1    | red | -0.28735 | 0.154636 | DDHD1     | purple | 0.029844286   | 0.882524231 | SAMD8     | salmon | -0.01751 | 0.932333 |
| MORF4L2   | red | -0.286   | 0.156661 | RAB18     | purple | 0.030340404   | 0.880585006 | ACVR1     | salmon | -0.01721 | 0.933517 |
| DHRS59    | red | -0.28553 | 0.157371 | SLC44A2   | purple | 0.038853107   | 0.84742422  | ZNF182    | salmon | -0.01385 | 0.946471 |
| WDR47     | red | -0.28529 | 0.157735 | AKAP10    | purple | 0.040105261   | 0.842566473 | TSN       | salmon | -0.01049 | 0.959441 |
| KCTD9     | red | -0.28509 | 0.158044 | SLC4A2    | purple | 0.040266325   | 0.841942027 | PILRB     | salmon | -0.01012 | 0.960871 |
| GPR108    | red | 0.284137 | 0.1595   | CCDC25    | purple | 0.040783674   | 0.839936895 | C19orf43  | salmon | -0.00472 | 0.981758 |
| LOC731275 | red | -0.28344 | 0.160574 | BDP1      | purple | 0.043718578   | 0.828580642 | CHCHD4    | salmon | -0.00373 | 0.985587 |
| SMARCD2   | red | 0.28276  | 0.16162  | CWF19L1   | purple | 0.050497328   | 0.80248284  | GSTP1     | salmon | -0.00056 | 0.997823 |
| FIG4      | red | -0.28251 | 0.162007 | CBWD5     | purple | 0.050561935   | 0.802235054 | PPARA     | salmon | 0.003969 | 0.984648 |
| FGF10     | red | -0.28205 | 0.162719 | BMS1P4    | purple | 0.053992628   | 0.789104663 | TLK2      | salmon | 0.006291 | 0.97567  |
| TTC23     | red | -0.28115 | 0.164122 | ZNF148    | purple | 0.054172274   | 0.788418613 | NDUFA12   | salmon | 0.013237 | 0.94883  |
| ADAM9     | red | -0.28098 | 0.164394 | C14orf28  | purple | 0.056821733   | 0.77831872  | CCT7      | salmon | 0.021898 | 0.915441 |
| FAM82B    | red | -0.28089 | 0.164525 | FAM82A2   | purple | 0.065888494   | 0.744029924 | ACD       | salmon | 0.023813 | 0.908074 |
| CLIP1     | red | -0.28012 | 0.165746 | GTF2H2C   | purple | 0.068254697   | 0.735156327 | NRIP1     | salmon | 0.028698 | 0.889322 |
| SECISBP2L | red | -0.27938 | 0.166903 | NAT10     | purple | 0.069311332   | 0.731204409 | RP55      | salmon | 0.030445 | 0.882629 |
| ALG11     | red | -0.27928 | 0.167072 | BTBD3     | purple | 0.069569419   | 0.730240153 | NARS      | salmon | 0.030991 | 0.880538 |
| WWP1      | red | -0.2771  | 0.170536 | PTPN2     | purple | 0.072143437   | 0.720645279 | FLII      | salmon | 0.031112 | 0.880075 |
| ATP6VOA2  | red | -0.27691 | 0.170847 | TAF7      | purple | 0.074949032   | 0.710232983 | DOT1L     | salmon | 0.032187 | 0.875961 |
| CLIC1     | red | 0.276879 | 0.170898 | PSTPIP2   | purple | 0.076034003   | 0.706221302 | PSMB3     | salmon | 0.032694 | 0.874024 |
| RGS18     | red | -0.27647 | 0.171561 | SH3YL1    | purple | 0.07703865    | 0.702512453 | DKC1      | salmon | 0.033011 | 0.872811 |
| AP3B1     | red | -0.27494 | 0.174033 | SUZ12P1   | purple | 0.08209801    | 0.683937322 | SSSCA1    | salmon | 0.033409 | 0.87129  |
| FADS1     | red | -0.27456 | 0.174658 | LRIG2     | purple | 0.083589837   | 0.678493573 | TMEM134   | salmon | 0.033797 | 0.869809 |
| IFI44L    | red | -0.27323 | 0.176838 | SDAD1     | purple | 0.083711465   | 0.678050443 | BRD4      | salmon | 0.039134 | 0.849464 |
| BLZF1     | red | -0.27302 | 0.177181 | DDX17     | purple | 0.084645021   | 0.674652688 | ORMDL2    | salmon | 0.040247 | 0.84523  |
| SERAC1    | red | -0.27257 | 0.177924 | DBNDD2    | purple | 0.090112695   | 0.654879277 | RGL3      | salmon | 0.04027  | 0.845146 |
| FUS       | red | -0.27227 | 0.17842  | EXOSC9    | purple | 0.09581979    | 0.634479776 | SPIRE1    | salmon | 0.044423 | 0.829395 |
| SF3A1     | red | 0.272099 | 0.17871  | BOLA3     | purple | 0.096361777   | 0.632555677 | C14orf2   | salmon | 0.046983 | 0.819717 |
| GNAI1     | red | -0.27195 | 0.178964 | GPR34     | purple | 0.101188249   | 0.615525339 | SCAMP3    | salmon | 0.052489 | 0.798989 |
| HELLS     | red | -0.27175 | 0.179285 | NUP54     | purple | 0.102616447   | 0.610522428 | RAB4B     | salmon | 0.053769 | 0.79419  |
| FBXO8     | red | -0.27132 | 0.180002 | DPY30     | purple | 0.106145339   | 0.598234229 | GADD45GIP | salmon | 0.055209 | 0.788798 |
| TMEM206   | red | -0.27074 | 0.180984 | H6PD      | purple | 0.110269275   | 0.584009256 | SENP5     | salmon | 0.058256 | 0.777422 |
| GCHFR     | red | -0.26973 | 0.182675 | DHX38     | purple | 0.112460963   | 0.576510025 | PNL1YP    | salmon | 0.058547 | 0.776337 |
| ARAP2     | red | -0.26958 | 0.182926 | TAF1A     | purple | 0.114454765   | 0.569725171 | SEC24D    | salmon | 0.063199 | 0.759064 |
| RIOK3     | red | -0.26958 | 0.182928 | COP52     | purple | 0.121027363   | 0.547616065 | COX6A1    | salmon | 0.066656 | 0.746299 |
| DUSP8     | red | 0.269332 | 0.183343 | UBE2Z     | purple | 0.130925127   | 0.515093761 | VIPAS39   | salmon | 0.067186 | 0.744345 |
| PIK3C2A   | red | -0.26886 | 0.184149 | ATP6VOC   | purple | 0.133428501   | 0.50702019  | SELK      | salmon | 0.069554 | 0.735648 |
| PER3      | red | -0.2686  | 0.184589 | GPR180    | purple | 0.139883398   | 0.486494599 | TMEM223   | salmon | 0.069629 | 0.735372 |
| RFC3      | red | -0.2685  | 0.184758 | C8orf76   | purple | 0.142828046   | 0.477273259 | MRPL14    | salmon | 0.077374 | 0.707147 |
| GRB2      | red | -0.26821 | 0.185248 | FAM217B   | purple | 0.144568415   | 0.471865727 | RBM3      | salmon | 0.078284 | 0.703854 |
| HSP90AA1  | red | -0.26808 | 0.185465 | RGS10     | purple | 0.151506278   | 0.450627717 | UBA52     | salmon | 0.080833 | 0.694659 |
| RAP1GDS1  | red | -0.26781 | 0.185919 | COG7      | purple | 0.154923719   | 0.440356397 | BANF1     | salmon | 0.082024 | 0.690375 |
| MMS22L    | red | -0.26718 | 0.187005 | HNRPL     | purple | 0.162332307   | 0.418528502 | ASNA1     | salmon | 0.083782 | 0.684073 |
| MAFF      | red | 0.266938 | 0.187419 | ZCHC4     | purple | 0.168146421   | 0.401825959 | PARK7     | salmon | 0.086568 | 0.674126 |
| ANGEL2    | red | -0.26654 | 0.188107 | BIRC2     | purple | 0.168412545   | 0.401070552 | RANGAP1   | salmon | 0.089095 | 0.665148 |
| PTPN9     | red | -0.26601 | 0.189012 | SNRPE     | purple | 0.170430661   | 0.395368137 | ZNF646    | salmon | 0.092031 | 0.654775 |
| C3orf62   | red | -0.26577 | 0.189423 | TMAM41    | purple | 0.176299104   | 0.379049805 | ENY2      | salmon | 0.099191 | 0.629738 |
| METTL21A  | red | -0.2654  | 0.190068 | NFKBIZ    | purple | 0.194571454   | 0.330792174 | RPL23A    | salmon | 0.102491 | 0.618332 |
| C20orf72  | red | -0.2654  | 0.190075 | ICT1      | purple | 0.19627631    | 0.326489088 | SNRPG     | salmon | 0.104573 | 0.611176 |
| PI4KB     | red | 0.265347 | 0.190162 | SBDSP1    | purple | 0.206069585   | 0.30243649  | DRG1      | salmon | 0.108216 | 0.598745 |
| GPS1      | red | 0.265324 | 0.190202 | MOB4      | purple | 0.206946588   | 0.300338005 | RDH14     | salmon | 0.111253 | 0.588463 |
| TRAPP1C1  | red | -0.26458 | 0.191494 | LOC388796 | purple | 0.211933782   | 0.288578362 | EXOC4     | salmon | 0.113036 | 0.58246  |
| TMEM68    | red | -0.26453 | 0.191582 | UBE2T     | purple | 0.212099521   | 0.288192629 | RNF40     | salmon | 0.11446  | 0.577687 |
| LRRCC8B   | red | -0.26364 | 0.193134 | DYNCL11   | purple | 0.213133995   | 0.285792415 | KLHDC4    | salmon | 0.115357 | 0.57469  |
| PON2      | red | -0.26321 | 0.193895 | SBD5      | purple | 0.215248813   | 0.280925133 | POLDIP2   | salmon | 0.116076 | 0.572291 |
| ACADM     | red | -0.26193 | 0.196152 | TM2D1     | purple | 0.222893143   | 0.26377468  | SERPINA1  | salmon | 0.117657 | 0.567033 |
| SERF1A    | red | -0.2617  | 0.196563 | KATNA1    | purple | 0.233621622   | 0.24087256  | LYRM7     | salmon | 0.126303 | 0.538673 |
| UCHL3     | red | -0.26107 | 0.197669 | MTIF3     | purple | 0.242321241   | 0.223296611 | NDEL1     | salmon | 0.12757  | 0.534576 |
| CNDP2     | red | -0.26088 | 0.198008 | MINPP1    | purple | 0.255289012   | 0.198732209 | WBSR22    | salmon | 0.129369 | 0.52878  |
| LINC00174 | red | -0.26087 | 0.198024 | MRPL33    | purple | 0.280864844   | 0.158866663 | FUT4      | salmon | 0.132345 | 0.519261 |
| C5orf15   | red | -0.26014 | 0.199328 | METTL5    | purple | 0.292525167   | 0.138688835 | SUPT4H1   | salmon | 0.138305 | 0.500449 |
| REEP3     | red | -0.25911 | 0.201176 | TMEM126A  | purple | 0.294847741   | 0.135437619 | NAALADL1  | salmon | 0.141739 | 0.489765 |
| DYX1C1    | red | -0.25854 | 0.202201 | DBI       | purple | 0.300529485   | 0.127717612 | CALM3     | salmon | 0.141933 | 0.489164 |
| TAX1BP1   | red | -0.25854 | 0.202212 | SLIRP     | purple | 0.331248293   | 0.091449222 | SFT2D1    | salmon | 0.143085 | 0.485607 |
| PTDS2     | red | 0.258503 | 0.202277 | FBXO22    | purple | 0.343005988   | 0.079849859 | TIMM23    | salmon | 0.148844 | 0.468029 |
| FAM83H    | red | 0.258373 | 0.202513 | RPL23     | purple | 0.353492874   | 0.070482701 | ARHGAP25  | salmon | 0.151232 | 0.460839 |
| MAP3K1    | red | -0.25813 | 0.202947 | CCOAMD3   | purple | 0.369381429   | 0.057930283 | NOP16     | salmon | 0.153046 | 0.455416 |
| C4orf34   | red | -0.25764 | 0.203849 | CCDC90A   | purple | 0.382509682   | 0.048936276 | ARL8A     | salmon | 0.154071 | 0.452365 |
| RPL24     | red | -0.2569  | 0.205188 | CCDC146   | purple | 0.401373754   | 0.037978882 | AKT2      | salmon | 0.157159 | 0.443244 |
| MPHOSPH8  | red | -0.25619 | 0.206482 | BCL3      | red    | -0.621002635  | 0.000546981 | MBD3      | salmon | 0.157466 | 0.442343 |
| ESD       | red | -0.25508 | 0.208525 | SGTB      | red    | -0.620828262  | 0.000549526 | TIMM10    | salmon | 0.158401 | 0.439601 |
| CRBN      | red | -0.2546  | 0.209423 | RAF1      | red    | -0.590509453  | 0.001184027 | PSMC1     | salmon | 0.160569 | 0.433285 |
| EPMD2A    | red | -0.25416 | 0.210237 | SMARCD1   | red    | -0.569985071  | 0.001910382 | COQ6      | salmon | 0.161412 | 0.430843 |
| ST7       | red | -0.25414 | 0.210    |           |        |               |             |           |        |          |          |

Table 6. Gene module membership and correlation with growth rate (48/72h), with adjusted p values for each module

|            |     |          |          |           |     |              |             |          |         |          |          |
|------------|-----|----------|----------|-----------|-----|--------------|-------------|----------|---------|----------|----------|
| IL1RAP     | red | -0.24958 | 0.218842 | RNF24     | red | -0.53561782  | 0.003985777 | TCEB2    | salmon  | 0.198984 | 0.329801 |
| PAIP2      | red | -0.24795 | 0.221965 | HEATR6    | red | -0.534209478 | 0.004101093 | RBX1     | salmon  | 0.201937 | 0.322526 |
| ME2        | red | -0.24781 | 0.222243 | SLC35B2   | red | -0.52907144  | 0.004546178 | CCDC71   | salmon  | 0.20562  | 0.31359  |
| WDSUB1     | red | -0.24755 | 0.222735 | EML4      | red | -0.524961929 | 0.004931087 | HMGXB4   | salmon  | 0.206788 | 0.310788 |
| SNF8       | red | 0.246632 | 0.224518 | PRKCSH    | red | -0.523844861 | 0.005040368 | CHCHD5   | salmon  | 0.208967 | 0.305605 |
| SSB        | red | -0.24662 | 0.224547 | FLAD1     | red | -0.523589809 | 0.005065606 | OTUD5    | salmon  | 0.214944 | 0.291659 |
| GART       | red | -0.24657 | 0.224641 | DARS2     | red | -0.523152033 | 0.005109173 | LMAN2    | salmon  | 0.21896  | 0.282518 |
| TCP11L1    | red | -0.24516 | 0.227391 | POLR3C    | red | -0.522470889 | 0.005177592 | COX4I1   | salmon  | 0.227569 | 0.263542 |
| BCOR       | red | -0.24451 | 0.228656 | SLC23A2   | red | -0.520241893 | 0.005406939 | CLASP1   | salmon  | 0.231816 | 0.254492 |
| DDX21      | red | -0.2444  | 0.228875 | NIN1A     | red | -0.518408396 | 0.005601985 | ANKZF1   | salmon  | 0.234128 | 0.24965  |
| PTPN12     | red | -0.24435 | 0.228971 | RANBP9    | red | -0.515949558 | 0.00587287  | SUMO2    | salmon  | 0.235267 | 0.247288 |
| RABEPK     | red | -0.24367 | 0.230307 | GTF3C5    | red | -0.507928858 | 0.006834725 | UBE2D3   | salmon  | 0.251393 | 0.215409 |
| TMEM189    | red | 0.243142 | 0.231355 | ARL15     | red | -0.50622344  | 0.007055491 | BAP1     | salmon  | 0.251747 | 0.214743 |
| JC10050571 | red | -0.24306 | 0.231526 | UQCRC10   | red | -0.503333722 | 0.007443267 | CP5F3L   | salmon  | 0.254526 | 0.209554 |
| MED29      | red | 0.242733 | 0.232166 | BCAP31    | red | -0.495888119 | 0.008525812 | INTS9    | salmon  | 0.265581 | 0.189758 |
| WDR3       | red | -0.24272 | 0.232191 | ANPEP     | red | -0.493305991 | 0.008930788 | ENDOG    | salmon  | 0.272258 | 0.178447 |
| SKA2       | red | -0.24267 | 0.232294 | NRBP1     | red | -0.492328446 | 0.00908825  | SLC25A28 | salmon  | 0.275775 | 0.172681 |
| SEPF5C5    | red | -0.24263 | 0.232373 | PRPF38A   | red | -0.491427831 | 0.009235371 | STX5     | salmon  | 0.275817 | 0.172612 |
| APBB1P     | red | -0.2418  | 0.234029 | POLR3H    | red | -0.491193951 | 0.009273901 | ERGIC3   | salmon  | 0.286009 | 0.15665  |
| ZNF568     | red | -0.24167 | 0.234276 | SEC24A    | red | -0.491152965 | 0.009280667 | VPS39    | salmon  | 0.288229 | 0.153315 |
| CLNS1A     | red | -0.24022 | 0.23719  | UBAC2     | red | -0.488168845 | 0.009784508 | CHMP6    | salmon  | 0.303783 | 0.131368 |
| RBMX2      | red | -0.23982 | 0.237999 | BET1L     | red | -0.486606097 | 0.010154079 | SYS1     | salmon  | 0.316031 | 0.115761 |
| EMR2       | red | 0.23892  | 0.23981  | MSANTD3   | red | -0.485809632 | 0.010198839 | RNA5E2C  | salmon  | 0.325015 | 0.105213 |
| JC10013271 | red | -0.23888 | 0.239896 | NF1       | red | -0.484303228 | 0.010470981 | DOK1     | salmon  | 0.330929 | 0.098671 |
| C9orf156   | red | -0.23781 | 0.242068 | DENND2D   | red | -0.483617373 | 0.010596878 | PSMD8    | salmon  | 0.336714 | 0.09257  |
| DAP        | red | 0.236369 | 0.245017 | ORMDL1    | red | -0.483613964 | 0.010597507 | NFKB1L1  | salmon  | 0.351635 | 0.078143 |
| TGFBRAP1   | red | -0.23607 | 0.245634 | LRCH3     | red | -0.480250052 | 0.01123345  | ASCC2    | salmon  | 0.366799 | 0.065303 |
| DENND1A    | red | -0.23598 | 0.24582  | ABHD13    | red | -0.479672465 | 0.011345776 | CSTF2T   | salmon  | 0.425153 | 0.030374 |
| SAR1B      | red | -0.2358  | 0.246191 | UBE2A     | red | -0.478157621 | 0.011644821 | LAMTOR2  | salmon  | 0.465096 | 0.01666  |
| DVL1       | red | 0.235591 | 0.246618 | GNP1      | red | -0.475342608 | 0.012217956 | FAR1     | skyblue | -0.28817 | 0.153401 |
| DERL2      | red | -0.23459 | 0.248681 | XRN2      | red | -0.472745677 | 0.012762788 | AKAP11   | skyblue | -0.2809  | 0.164512 |
| MTFHD1L    | red | -0.23438 | 0.24912  | FAM58A    | red | -0.471758274 | 0.012981461 | DOCK10   | skyblue | -0.27728 | 0.170258 |
| ANK1B1     | red | -0.23423 | 0.249433 | PLK3      | red | -0.47116971  | 0.013110536 | EI24     | skyblue | -0.27501 | 0.173916 |
| GABARAP    | red | -0.23401 | 0.2499   | BM11      | red | -0.468811543 | 0.013638417 | RADS4L2  | skyblue | -0.22996 | 0.25843  |
| QPCTL      | red | 0.232398 | 0.253268 | FOSL2     | red | -0.467413068 | 0.013959701 | GTDC1    | skyblue | -0.21562 | 0.290119 |
| CRNK1L1    | red | -0.23203 | 0.254038 | ATG9A     | red | -0.464872863 | 0.01455931  | MED27    | skyblue | -0.20373 | 0.318152 |
| ERCC1      | red | -0.23178 | 0.254558 | ATXN2     | red | -0.463291233 | 0.014943294 | CYCS     | skyblue | -0.19287 | 0.345183 |
| UQCRC1     | red | -0.23171 | 0.254707 | VPRBP     | red | -0.463104538 | 0.014989166 | ZNF84    | skyblue | -0.18819 | 0.357219 |
| MPRIP      | red | -0.23139 | 0.255394 | PTPN9     | red | -0.462411593 | 0.015160446 | MRPL20   | skyblue | -0.17518 | 0.392018 |
| SEC11C     | red | -0.23102 | 0.256182 | ALG9      | red | -0.460064829 | 0.015752561 | ALG14    | skyblue | -0.1688  | 0.409769 |
| PPP4R1L    | red | -0.23093 | 0.256361 | MGAT5     | red | -0.45995364  | 0.015781081 | ZC3H18   | skyblue | -0.16639 | 0.416584 |
| ZSWIM3     | red | -0.23057 | 0.257117 | ARFGF2    | red | -0.457543593 | 0.016409822 | SCAMP1   | skyblue | -0.15051 | 0.463016 |
| PRES1      | red | -0.2299  | 0.258543 | ZBTB49    | red | -0.456464034 | 0.016698079 | SLC22A15 | skyblue | -0.15037 | 0.463431 |
| GDAP2      | red | -0.22963 | 0.259115 | APH1A     | red | -0.454677185 | 0.017184345 | DES12    | skyblue | -0.15016 | 0.464066 |
| ATF6       | red | -0.22885 | 0.260799 | SLC15A4   | red | -0.452463787 | 0.017802784 | NHLRC2   | skyblue | -0.13943 | 0.496928 |
| CDK17      | red | -0.22704 | 0.264684 | GNL3      | red | -0.451116034 | 0.018188233 | MED23    | skyblue | -0.13385 | 0.514469 |
| LYRM9      | red | -0.22688 | 0.265026 | QRS1L     | red | -0.450946828 | 0.018237106 | KAT2B    | skyblue | -0.12969 | 0.527746 |
| POFUT1     | red | -0.22563 | 0.267732 | PITHD1    | red | -0.450864685 | 0.01826087  | IF130    | skyblue | -0.11649 | 0.570898 |
| SYTL3      | red | -0.22541 | 0.268218 | STRN      | red | -0.449368754 | 0.01869812  | METTL5   | skyblue | -0.11081 | 0.589941 |
| RAB7L1     | red | 0.225085 | 0.268931 | SAV1      | red | -0.448706304 | 0.018894475 | IDS      | skyblue | -0.10708 | 0.602614 |
| ENPP5      | red | -0.22471 | 0.269748 | C10orf32  | red | -0.44821011  | 0.019042655 | NAV1     | skyblue | -0.10198 | 0.620085 |
| SMG7       | red | -0.22458 | 0.270035 | RUNX1     | red | -0.446061159 | 0.019695448 | ZNF624   | skyblue | -0.09964 | 0.628198 |
| VASH1      | red | 0.224162 | 0.270951 | POLR1D    | red | -0.444342924 | 0.020230488 | MSR1     | skyblue | -0.09778 | 0.634652 |
| SKI        | red | -0.22364 | 0.272093 | IBTK      | red | -0.443996713 | 0.020339721 | SYNJ1    | skyblue | -0.09724 | 0.636533 |
| NSDHL      | red | -0.22363 | 0.272116 | TTI1      | red | -0.443132154 | 0.020614607 | HECTD4   | skyblue | -0.09721 | 0.636636 |
| FAM179B    | red | -0.22342 | 0.272578 | RBM18     | red | -0.44040707  | 0.021500989 | C12orf73 | skyblue | -0.09596 | 0.64098  |
| CHMP6      | red | 0.222415 | 0.274801 | SPOP      | red | -0.440223709 | 0.021561731 | TRIT1    | skyblue | -0.08627 | 0.675171 |
| LMBRD1     | red | -0.22149 | 0.276861 | EMD       | red | -0.438201728 | 0.022240888 | ZC3H11A  | skyblue | -0.06669 | 0.746155 |
| ARHGAP11f  | red | -0.22023 | 0.279659 | TMEM64    | red | -0.43502261  | 0.023343914 | GFP1     | skyblue | -0.05548 | 0.787767 |
| GORASP2    | red | -0.21977 | 0.280693 | SETD3     | red | -0.432889924 | 0.024108528 | GALK1    | skyblue | -0.05301 | 0.797021 |
| STK19      | red | -0.21932 | 0.281697 | PTBP3     | red | -0.430577879 | 0.024960326 | WDFY3    | skyblue | -0.04336 | 0.833437 |
| CDCSL      | red | -0.21907 | 0.282259 | TNPO2     | red | -0.429638225 | 0.025313423 | ABT1     | skyblue | -0.03881 | 0.85071  |
| TELO2      | red | -0.21863 | 0.283266 | MED30     | red | -0.429572583 | 0.02533824  | BMPR2    | skyblue | -0.0333  | 0.871705 |
| XPO1       | red | -0.21836 | 0.283871 | ZCCHC14   | red | -0.429281527 | 0.025448517 | NFAT5    | skyblue | -0.02872 | 0.889247 |
| MTX2       | red | -0.21677 | 0.287473 | RNF10     | red | -0.427887378 | 0.025982157 | ZNF652   | skyblue | -0.02728 | 0.894748 |
| DLD        | red | -0.2157  | 0.289924 | PRDM10    | red | -0.425330941 | 0.026984247 | C21orf33 | skyblue | -0.01602 | 0.938077 |
| KIAA0586   | red | -0.21546 | 0.290464 | INTS6     | red | -0.423604243 | 0.027678627 | SMAD5    | skyblue | -0.01598 | 0.938244 |
| BAK1       | red | 0.215317 | 0.290802 | TINF2     | red | -0.423525964 | 0.027710445 | RGMB     | skyblue | -0.01242 | 0.951989 |
| ELOVL5     | red | 0.214621 | 0.292403 | CNOT6     | red | -0.422146218 | 0.028276153 | CHMP2A   | skyblue | -0.00841 | 0.967463 |
| MS4A4A     | red | -0.21397 | 0.293914 | DOPEY2    | red | -0.42110104  | 0.028710869 | FBXO10   | skyblue | -0.00084 | 0.996733 |
| PPM1M      | red | 0.213276 | 0.295509 | PER3      | red | -0.420626704 | 0.02890993  | ARPC2    | skyblue | 0.001673 | 0.993526 |
| PSMA6      | red | -0.21215 | 0.298124 | LMTK2     | red | -0.419947479 | 0.029196913 | DST      | skyblue | 0.002253 | 0.991285 |
| PRMT1      | red | 0.211897 | 0.298718 | DAGLB     | red | -0.419907025 | 0.029214078 | PDXP     | skyblue | 0.003845 | 0.985127 |
| CDC37L1    | red | -0.21019 | 0.302715 | TADA2A    | red | -0.419638126 | 0.02932838  | KANSL1   | skyblue | 0.015023 | 0.941934 |
| ZNF441     | red | 0.209087 | 0.305321 | BRPF1     | red | -0.418437147 | 0.029843298 | MRT0A    | skyblue | 0.020407 | 0.921179 |
| TH1L       | red | -0.20831 | 0.307162 | ARNTL     | red | -0.415100975 | 0.031312027 | LONRF3   | skyblue | 0.023217 | 0.910364 |
| PNKP       | red | 0.207842 | 0.308273 | DTD1      | red | -0.413730035 | 0.031932189 | EXOSC7   | skyblue | 0.023322 | 0.909963 |
| PPP1R12A   | red | 0.206162 | 0.312288 | RASSF3    | red | -0.411981206 | 0.032737589 | FAM207A  | skyblue | 0.038577 | 0.851584 |
| DCUN1D5    | red | -0.20566 | 0.3135   | USP54     | red | -0.409884865 | 0.033724447 | CERS5    | skyblue | 0.054336 | 0.792066 |
| TEFM       | red | -0.20557 | 0.313706 | MTRR      | red | -0.407979269 | 0.034642084 | NDUFA1   | skyblue | 0.059245 | 0.773739 |
| MMGT1      | red | -0.20533 | 0.314289 | HNRNP11   | red | -0.407222322 | 0.035012095 | PUM2     | skyblue | 0.065565 | 0.750322 |
| ICOSLG     | red | 0.205189 | 0.314629 | TTCS      | red | -0.405879228 | 0.035676413 | PSMA5    | skyblue | 0.110957 | 0.589462 |
| TMPO       | red | -0.20514 | 0.314752 | TM6SF1    | red | -0.402508373 | 0.03738818  | THRAP3   | skyblue | 0.130932 | 0.52377  |
| MX2        | red | -0.20505 | 0.314957 | FAM168A   | red | -0.401182506 | 0.038079178 | TMSB10   | skyblue | 0.138263 | 0.50058  |
| SRSF10     | red | -0.20465 | 0.315941 | INPP5F    | red | -0.399272154 | 0.039092662 | ISCA2    | skyblue | 0.139442 | 0.496898 |
| LRRC6      | red | -0.20388 | 0.317789 | ALG8      | red | -0.399260552 | 0.039098883 | TSR3     | skyblue | 0.149715 | 0.465401 |
| ATFB8      | red | 0.203407 | 0.318941 | E1F2B2    | red | -0.397850022 | 0.039860997 | DPM2     | skyblue | 0.160852 | 0.432463 |
| SREK1IP1   | red | -0.203   | 0.31994  | PRKCH     | red | -0.397671796 | 0.039958128 | DAK      | skyblue | 0.192579 | 0.34592  |
| CZCD2      | red | -0.20203 | 0.32229  | SOS1      | red | -0.3970908   | 0.040276075 | CYLD     | skyblue | 0.193598 | 0.343325 |
| HIST2H2BA  | red | -0.20197 | 0.322451 | MTMR9     | red | -0.396095963 | 0.040825163 | TMEM160  | skyblue | 0.199517 | 0.328482 |
| MGST1      | red | -0.20183 | 0.322795 | ZDC339803 | red | -0.394342594 | 0.041807387 | ZNF593   | skyblue | 0.201747 | 0.322992 |
| CLRL       | red | 0.201636 | 0.323262 | LDHHC17   | red | -0.39341095  | 0.042336868 | CLIC1    | skyblue | 0.205252 | 0.314478 |
| CENPF      | red | -0.20146 | 0.32369  | POLE3     | red | -0.390828667 | 0.043832309 | COQ4     | skyblue | 0.211555 | 0.299515 |
| VWA8       | red | -0.2012  | 0.324328 | YWHA8     | red | -0.38883331  | 0.045016261 |          |         |          |          |

Table 6. Gene module membership and correlation with growth rate (48/72h), with adjusted p values for each module

|           |     |          |          |          |     |              |             |          |           |          |          |
|-----------|-----|----------|----------|----------|-----|--------------|-------------|----------|-----------|----------|----------|
| SUPT4H1   | red | 0.195094 | 0.339535 | PEX26    | red | -0.381070281 | 0.04986503  | LETM1    | steelblue | -0.25698 | 0.205043 |
| TTCC21B   | red | -0.19395 | 0.342425 | FLU1     | red | -0.377692228 | 0.05209914  | MRPS31   | steelblue | -0.24545 | 0.226825 |
| RB1       | red | -0.1933  | 0.344074 | EIF2B1   | red | -0.377343354 | 0.052334274 | ATPG53   | steelblue | -0.23667 | 0.244391 |
| TMX3      | red | -0.19284 | 0.345254 | FNBP1    | red | -0.37436714  | 0.054374182 | DNAJC16  | steelblue | -0.23563 | 0.246532 |
| USP15     | red | -0.19211 | 0.347111 | ZNF529   | red | -0.373021717 | 0.055316523 | SERINC1  | steelblue | -0.22509 | 0.268917 |
| CLDN23    | red | -0.19063 | 0.350918 | STAM     | red | -0.371382127 | 0.056482107 | NABP2    | steelblue | -0.21018 | 0.302737 |
| NKIRAS1   | red | -0.19031 | 0.351752 | WRAP73   | red | -0.37008866  | 0.057415094 | TUBGCP2  | steelblue | -0.20965 | 0.303997 |
| TALD01    | red | 0.189328 | 0.354278 | RBBP8    | red | -0.369447252 | 0.057882183 | AHNAK    | steelblue | -0.20883 | 0.305939 |
| ITPK1     | red | 0.18932  | 0.354299 | RDH10    | red | -0.367010696 | 0.059683597 | EIF2AK4  | steelblue | -0.20522 | 0.314547 |
| DPP8      | red | -0.18931 | 0.354319 | SURF4    | red | -0.36581129  | 0.060586227 | AHCTF1   | steelblue | -0.20386 | 0.317843 |
| ZRSR2     | red | -0.18804 | 0.357621 | CRAT     | red | -0.363900898 | 0.06204579  | HS2ST1   | steelblue | -0.19956 | 0.328381 |
| N4BP2     | red | -0.18749 | 0.359053 | CPNE3    | red | -0.358228046 | 0.066541143 | GIT2     | steelblue | -0.19841 | 0.331224 |
| MMADHC    | red | -0.18727 | 0.359627 | PRR13    | red | -0.357206172 | 0.06737699  | USP24    | steelblue | -0.18811 | 0.357444 |
| ALPK3     | red | 0.187211 | 0.359784 | CDC25B   | red | -0.354008462 | 0.07004501  | VPS36    | steelblue | -0.17824 | 0.383663 |
| TOMM40    | red | 0.186867 | 0.360682 | ALG11    | red | -0.353374913 | 0.070583135 | HK1      | steelblue | -0.16507 | 0.420343 |
| UBXN2A    | red | -0.18622 | 0.362384 | ACOT4    | red | -0.352551726 | 0.07128708  | VEZF1    | steelblue | -0.16475 | 0.421243 |
| SIRPB2    | red | -0.1862  | 0.36243  | IP6K1    | red | -0.35223274  | 0.071569457 | R3HDM2   | steelblue | -0.14964 | 0.46563  |
| CEPB3     | red | -0.18592 | 0.363159 | LDHA     | red | -0.35125879  | 0.072403613 | SND1     | steelblue | -0.12968 | 0.527777 |
| RPAP2     | red | -0.18461 | 0.366616 | MET      | red | -0.349791351 | 0.073687061 | KIAA1468 | steelblue | -0.12369 | 0.547177 |
| MOB3B     | red | 0.183713 | 0.368991 | YRDC     | red | -0.347840496 | 0.075420251 | SCAF11   | steelblue | -0.11035 | 0.5915   |
| CHCHD2    | red | 0.183634 | 0.369199 | CTNNA1   | red | -0.347487108 | 0.075737521 | RAB3GAP2 | steelblue | -0.10607 | 0.60606  |
| ERAP1     | red | -0.18324 | 0.370255 | FARS2    | red | -0.344759956 | 0.078220433 | ELP6     | steelblue | -0.10444 | 0.611636 |
| TIMP1     | red | 0.182709 | 0.371658 | MGAT4B   | red | -0.343966561 | 0.078954318 | TNKS2    | steelblue | -0.10387 | 0.613591 |
| PPA2      | red | -0.18264 | 0.371855 | OTUD4    | red | -0.343957356 | 0.078962863 | PNN      | steelblue | -0.1027  | 0.617628 |
| BRMS1     | red | 0.181571 | 0.374695 | FAM127B  | red | -0.342906522 | 0.079943031 | COG2     | steelblue | -0.08351 | 0.685048 |
| QTRD1     | red | -0.18085 | 0.376631 | TMBIM6   | red | -0.341999719 | 0.080796287 | FAM82A2  | steelblue | -0.08202 | 0.690396 |
| CALM3     | red | 0.18015  | 0.378509 | ANKRD49  | red | -0.34089906  | 0.081841252 | DNAL4    | steelblue | -0.07486 | 0.71628  |
| ARHGAP10  | red | -0.17979 | 0.379491 | INSIG1   | red | -0.339836239 | 0.082860024 | MYCBP2   | steelblue | -0.06775 | 0.742289 |
| PKD1P1    | red | 0.179762 | 0.379554 | LOC92249 | red | -0.33922673  | 0.083448606 | QKI      | steelblue | -0.05945 | 0.772962 |
| SERTAD3   | red | -0.1793  | 0.380786 | TMEM230  | red | -0.336357338 | 0.08626225  | CD47     | steelblue | -0.05663 | 0.7835   |
| ZNF41     | red | 0.179159 | 0.381182 | DCTN4    | red | -0.334725633 | 0.087893997 | MRPL43   | steelblue | -0.049   | 0.812114 |
| H51BP3    | red | -0.17868 | 0.382486 | CLASP2   | red | -0.333773732 | 0.088856646 | CBWD5    | steelblue | -0.04298 | 0.834878 |
| DYRK4     | red | -0.17705 | 0.386904 | CHAMP1   | red | -0.332963722 | 0.089682061 | LAMP2    | steelblue | -0.01521 | 0.941214 |
| AKAP13    | red | -0.17695 | 0.387167 | TCF12    | red | -0.332297525 | 0.090365258 | TET2     | steelblue | -0.00768 | 0.970279 |
| ENOPH1    | red | -0.17463 | 0.393534 | MRPL48   | red | -0.329951548 | 0.092802405 | RNF41    | steelblue | 0.001207 | 0.995331 |
| SNRNP27   | red | -0.17444 | 0.394046 | ARPP19   | red | -0.329685994 | 0.093081367 | DCAF11   | steelblue | 0.013471 | 0.947925 |
| DDX27     | red | 0.174363 | 0.394265 | SNX27    | red | -0.329571538 | 0.093201797 | INVS     | steelblue | 0.014132 | 0.945375 |
| EMC8      | red | 0.173545 | 0.396521 | PSMA3    | red | -0.329046326 | 0.093755925 | C1D      | steelblue | 0.014467 | 0.944079 |
| SLC46A2   | red | 0.173361 | 0.397029 | TSC1     | red | -0.324349839 | 0.098821741 | TBCA     | steelblue | 0.014928 | 0.942303 |
| SETD1B    | red | 0.172651 | 0.398998 | MCL1     | red | -0.320634258 | 0.10297262  | MAF1     | steelblue | 0.01712  | 0.933845 |
| PIK3CA    | red | -0.17206 | 0.400645 | SDHC     | red | -0.316002095 | 0.108327974 | SOCCAG8  | steelblue | 0.026831 | 0.896482 |
| GIGYF2    | red | -0.17187 | 0.401157 | IGSF6    | red | -0.315684521 | 0.108702558 | DDX19B   | steelblue | 0.028791 | 0.888963 |
| RAD17     | red | -0.17122 | 0.402972 | FKBP11   | red | -0.313685517 | 0.111082529 | TIMM17B  | steelblue | 0.032228 | 0.875803 |
| XkorF38   | red | -0.16962 | 0.407438 | INPP5A   | red | -0.313134102 | 0.111745772 | GOLGA7   | steelblue | 0.047668 | 0.81713  |
| FGFR1OP   | red | -0.16937 | 0.408153 | BABAM1   | red | -0.313044631 | 0.111853663 | TDG      | steelblue | 0.054122 | 0.792868 |
| SPRNT     | red | -0.16739 | 0.413729 | RPL10    | red | -0.311302554 | 0.113969802 | GNB2L1   | steelblue | 0.062232 | 0.762644 |
| DDX54     | red | 0.166671 | 0.415774 | PLA2G7   | red | -0.310484162 | 0.114974068 | ACP6     | steelblue | 0.070462 | 0.732318 |
| PLEKHG3   | red | -0.16627 | 0.416904 | CD109    | red | -0.306287511 | 0.120226707 | SPRYD3   | steelblue | 0.091556 | 0.656449 |
| CTDSP1    | red | 0.164283 | 0.42258  | DDX60L   | red | -0.303577886 | 0.123710509 | NUDT4    | steelblue | 0.093024 | 0.65128  |
| MAP2K2    | red | 0.163772 | 0.424043 | KLHL36   | red | -0.302993348 | 0.124471653 | ICT1     | steelblue | 0.094365 | 0.646573 |
| GTPBP8    | red | -0.16368 | 0.424294 | TAOK2    | red | -0.301280353 | 0.126721926 | MRPL50   | steelblue | 0.113302 | 0.581567 |
| NR1D2     | red | -0.16367 | 0.424326 | VRK3     | red | -0.300597706 | 0.127626913 | PQLC2    | steelblue | 0.134991 | 0.510866 |
| TBCD      | red | -0.16267 | 0.427207 | LCMT1    | red | -0.299693372 | 0.128833044 | INPP5K   | steelblue | 0.165055 | 0.420371 |
| MED13L    | red | -0.16266 | 0.427248 | CSRNP1   | red | -0.298954831 | 0.1298242   | ASB8     | steelblue | 0.1708   | 0.404147 |
| EEF1D     | red | 0.161658 | 0.430131 | METTL17  | red | -0.298412443 | 0.130555638 | CLEC16A  | steelblue | 0.174691 | 0.393363 |
| GET4      | red | 0.161266 | 0.431265 | UBE2F    | red | -0.295413535 | 0.134654041 | UBA7     | steelblue | 0.176588 | 0.388163 |
| NUMP20    | red | -0.16111 | 0.431704 | DONSON   | red | -0.294487233 | 0.135938613 | PCMTD1   | steelblue | 0.195737 | 0.337914 |
| KIAA1191  | red | 0.160278 | 0.434131 | MAPKAPK2 | red | -0.292343908 | 0.138944919 | UZAF2    | steelblue | 0.216335 | 0.288472 |
| MPZL1     | red | -0.16012 | 0.434585 | HERPUD1  | red | -0.287420846 | 0.146031526 | NUDCD3   | steelblue | 0.276313 | 0.17181  |
| C10orf128 | red | 0.160084 | 0.434695 | TPGS2    | red | -0.284577322 | 0.150241038 | MAPK8IP3 | steelblue | 0.284942 | 0.158269 |
| ZNF570    | red | -0.16008 | 0.434717 | RAPGEF1  | red | -0.283135329 | 0.152408607 | CD180    | tan       | -0.36742 | 0.064814 |
| MBD2      | red | -0.15877 | 0.438523 | IL6R     | red | -0.282574666 | 0.153257383 | MT1E     | tan       | -0.35258 | 0.077287 |
| AP2B1     | red | -0.15722 | 0.443068 | SNRK     | red | -0.280811639 | 0.15594836  | MT2A     | tan       | -0.33126 | 0.098313 |
| AP1G2     | red | -0.1572  | 0.443126 | TMEM38B  | red | -0.279827484 | 0.157465061 | MT1X     | tan       | -0.3306  | 0.099022 |
| UVSSA     | red | 0.156738 | 0.444481 | SGP11    | red | -0.279780319 | 0.157538012 | MT1M     | tan       | -0.32934 | 0.100398 |
| NUMP37    | red | -0.15649 | 0.445201 | TRAK2    | red | -0.279374296 | 0.158166995 | RSPO3    | tan       | -0.3119  | 0.120866 |
| KCTD13    | red | 0.15489  | 0.449935 | CAPRIN1  | red | -0.27896164  | 0.158808079 | MT1F     | tan       | -0.30576 | 0.12875  |
| AHSA1     | red | -0.15454 | 0.450978 | MRAS     | red | -0.277477567 | 0.161128922 | PEA15    | tan       | -0.28643 | 0.15601  |
| INTS7     | red | -0.15403 | 0.452497 | NLRX1    | red | -0.276768897 | 0.162245603 | ARHGDI8  | tan       | -0.28266 | 0.161779 |
| TXK       | red | -0.15342 | 0.454292 | KIAA0430 | red | -0.276359523 | 0.162893161 | SLC2A4RG | tan       | 0.276913 | 0.170844 |
| PELP1     | red | 0.153353 | 0.4545   | VEZF1    | red | -0.273358207 | 0.167696646 | FXYD2    | tan       | -0.27393 | 0.175694 |
| GLCE      | red | -0.15283 | 0.456072 | FAM160B2 | red | -0.270459348 | 0.1724301   | RELT     | tan       | -0.27211 | 0.178696 |
| RPS6K4A   | red | 0.152485 | 0.457088 | ARPC1B   | red | -0.269845571 | 0.173444224 | NFKBIA   | tan       | 0.271902 | 0.179036 |
| MTPN      | red | -0.15201 | 0.458507 | GRB10    | red | -0.268814702 | 0.175156892 | MT1G     | tan       | -0.2703  | 0.181708 |
| RPL18     | red | 0.151537 | 0.459924 | PRUNE    | red | -0.26184631  | 0.187045132 | MCOLN2   | tan       | -0.26463 | 0.191414 |
| BTBD1     | red | -0.15137 | 0.460426 | PEF1     | red | -0.259909128 | 0.190446988 | CAMKK1   | tan       | 0.256741 | 0.205479 |
| HSD17B12  | red | -0.15137 | 0.460439 | ZNF384   | red | -0.255358034 | 0.198606644 | ENTPD1   | tan       | -0.25588 | 0.20706  |
| CENPP     | red | -0.15133 | 0.460537 | CNBI     | red | -0.254419962 | 0.200317867 | DCUN1D3  | tan       | -0.25254 | 0.213258 |
| COG6      | red | -0.15071 | 0.462409 | TBL2     | red | -0.249516633 | 0.209426794 | SAMD4A   | tan       | 0.244039 | 0.229584 |
| CCDC18    | red | -0.15035 | 0.463478 | CDCP1    | red | -0.248646127 | 0.211072876 | NFE2L3   | tan       | -0.234   | 0.249921 |
| ASB1      | red | 0.149387 | 0.466389 | AKR1B1   | red | -0.248178588 | 0.211960583 | CA12     | tan       | -0.23069 | 0.25687  |
| C17orf103 | red | 0.149224 | 0.46688  | DHR57    | red | -0.247794091 | 0.212692514 | CCL8     | tan       | -0.22834 | 0.261878 |
| ELF1      | red | -0.14878 | 0.468214 | RHCG     | red | -0.241151603 | 0.225608094 | NINJ1    | tan       | -0.2281  | 0.2624   |
| PRDX6     | red | 0.148224 | 0.469907 | ZDHHC9   | red | -0.240247472 | 0.227405817 | CENPV    | tan       | 0.222831 | 0.27388  |
| PQBP1     | red | -0.14812 | 0.470228 | SLC43A3  | red | -0.2398629   | 0.228173375 | MT1H     | tan       | -0.22064 | 0.278749 |
| MIPEP     | red | -0.14766 | 0.471626 | MZT1     | red | -0.238818979 | 0.230265635 | PROCR    | tan       | -0.21916 | 0.282075 |
| G2E3      | red | -0.14733 | 0.472627 | PPP1R13B | red | -0.237737439 | 0.232446754 | DHRS4    | tan       | -0.21836 | 0.28387  |
| RHOH      | red | -0.14566 | 0.477719 | HENMT1   | red | -0.237107541 | 0.233723372 | ACPS     | tan       | 0.212204 | 0.298002 |
| EDEM2     | red | 0.14524  | 0.47899  | DRAM1    | red | -0.234341795 | 0.239383865 | FAM124A  | tan       | -0.19846 | 0.331103 |
| RBM41     | red | -0.14494 | 0.479913 | GSP11    | red | -0.233832561 | 0.24043589  | C1S      | tan       | -0.1929  | 0.345095 |
| UBE2Q2P1  | red | -0.14388 | 0.483168 | KLC1     | red | -0.231082749 | 0.246169485 | TEX2     | tan       | -0.19093 | 0.350148 |
| PIK3IP1   | red | 0.1432   | 0.485252 | PLP2     | red | -0.227000977 | 0.254844877 | ESYT1    | tan       | 0.183695 | 0.369039 |
| TFB2M     | red | -0.14279 | 0.486526 | YWHAQ    | red | -0.226945824 | 0.254963447 | CIZ1     | tan       | 0.177968 | 0.384407 |
| MAN1A1    | red | -0.14267 | 0.486897 | SRC      | red | -0.220225663 | 0.269680505 | LCP2     | tan       | -0.17175 | 0.401498 |

Table 6. Gene module membership and correlation with growth rate (48/72h), with adjusted p values for each module

|           |     |          |          |             |     |              |             |            |     |          |          |
|-----------|-----|----------|----------|-------------|-----|--------------|-------------|------------|-----|----------|----------|
| TTF2      | red | -0.13902 | 0.498225 | SLC7A8      | red | -0.193982967 | 0.332285481 | IL2RA      | tan | -0.16355 | 0.424669 |
| CSF2RA    | red | -0.13861 | 0.499488 | IKZF5       | red | -0.191588587 | 0.338403354 | KYNU       | tan | -0.15983 | 0.435419 |
| THAP7     | red | -0.13706 | 0.504343 | TMEM222     | red | -0.190247875 | 0.341858437 | NNMT       | tan | -0.15947 | 0.436469 |
| PI4KAP1   | red | 0.136574 | 0.505877 | MICALL1     | red | -0.188994014 | 0.345108792 | SLC9A9     | tan | -0.1566  | 0.444896 |
| PFKL      | red | 0.135928 | 0.507911 | SHISA4      | red | -0.182717351 | 0.361656014 | PDCD1LG2   | tan | -0.15402 | 0.452529 |
| RPL35     | red | -0.13302 | 0.517118 | PACS1       | red | -0.182404991 | 0.362491484 | MYCL1      | tan | -0.15293 | 0.455771 |
| SAMD8     | red | -0.13263 | 0.518369 | DESI1       | red | -0.179604424 | 0.37003273  | TSFM       | tan | -0.1471  | 0.473329 |
| SRD5A1    | red | -0.13167 | 0.521424 | DUSP5       | red | -0.175356829 | 0.381643416 | NEDD9      | tan | -0.1453  | 0.47882  |
| RPUSD2    | red | 0.131591 | 0.521663 | ZNHIT1      | red | -0.173681712 | 0.386279322 | CISH       | tan | -0.14526 | 0.478934 |
| LINS2     | red | -0.12944 | 0.528557 | MAP4K4      | red | -0.165404143 | 0.409656579 | CABLES1    | tan | 0.144044 | 0.482658 |
| LTBR      | red | -0.1267  | 0.537387 | PSMA2       | red | -0.152581086 | 0.447383673 | JAG1       | tan | 0.143638 | 0.483904 |
| SNRN70    | red | 0.126305 | 0.53867  | ZNF217      | red | -0.151762528 | 0.449853158 | EPDR1      | tan | -0.14353 | 0.484225 |
| BCRP3     | red | -0.12484 | 0.543419 | C1orf52     | red | -0.150016867 | 0.455143725 | GPR84      | tan | -0.14233 | 0.487926 |
| CTR9      | red | -0.1232  | 0.548778 | ADAR        | red | -0.140231547 | 0.485399662 | KIAA0930   | tan | 0.140037 | 0.495045 |
| SF3B14    | red | -0.12268 | 0.550485 | LRP8        | red | -0.136368896 | 0.497617578 | SEMA4A     | tan | 0.136445 | 0.506283 |
| EFNA4     | red | 0.122    | 0.552706 | TNFSF15     | red | -0.130442112 | 0.516658699 | NFAM1      | tan | -0.13377 | 0.514724 |
| CE2       | red | -0.12193 | 0.552937 | FUT10       | red | -0.12589327  | 0.531509147 | CFB        | tan | 0.132726 | 0.518046 |
| COMMMD1   | red | -0.12142 | 0.554625 | NPRL3       | red | -0.122231295 | 0.543609866 | FABP4      | tan | -0.13177 | 0.521083 |
| CTNBP1    | red | -0.12138 | 0.554757 | ASF1A       | red | -0.095595585 | 0.635276402 | MCTP1      | tan | -0.13046 | 0.525268 |
| MRLP4     | red | 0.120406 | 0.557945 | TBCCD1      | red | -0.05504348  | 0.785093755 | EIF5B      | tan | 0.129122 | 0.529574 |
| CAMK1     | red | -0.12035 | 0.558122 | GABPB2      | red | -0.052038668 | 0.796576462 | GTPBP4     | tan | -0.1283  | 0.532229 |
| SLC47A1   | red | -0.11936 | 0.561391 | ENDOD1      | red | -0.043697027 | 0.828663915 | IL3RA      | tan | 0.126002 | 0.539651 |
| ERC1      | red | -0.1182  | 0.565222 | PCMTD2      | red | -0.038079121 | 0.850429646 | NCF1C      | tan | -0.12562 | 0.540902 |
| LOC344887 | red | 0.116565 | 0.570663 | RAD52       | red | -0.029150776 | 0.88523613  | G0S2       | tan | 0.122486 | 0.551112 |
| NSUN6     | red | -0.11643 | 0.571124 | EPB41L1     | red | -0.024516447 | 0.903389146 | FFAR2      | tan | -0.12019 | 0.55867  |
| FASN      | red | 0.112187 | 0.585316 | GOPC        | red | -0.017610288 | 0.930526587 | TNFSF15    | tan | -0.11748 | 0.567616 |
| ERMP1     | red | -0.11197 | 0.586053 | CLEC2B      | red | -0.011459558 | 0.954760526 | IDO1       | tan | -0.11692 | 0.569499 |
| CLCC1     | red | -0.11079 | 0.590031 | ZNF420      | red | -0.011416433 | 0.9549306   | CDKN2B     | tan | -0.11677 | 0.569987 |
| CY5D2     | red | -0.11019 | 0.592051 | POMT2       | red | -0.006958069 | 0.972522552 | C17orf49   | tan | 0.113089 | 0.582283 |
| LY96      | red | -0.10928 | 0.595145 | GRHL1       | red | -0.002621749 | 0.989645052 | CNBP       | tan | -0.1129  | 0.582934 |
| COQ7      | red | 0.107941 | 0.59968  | SIRT6       | red | 0.003398667  | 0.986576751 | CAT        | tan | -0.11288 | 0.582969 |
| NAAG60    | red | -0.10591 | 0.606605 | HLA-DPB1    | red | 0.00581267   | 0.977044449 | GRK5       | tan | -0.11259 | 0.583954 |
| ITPA      | red | -0.10513 | 0.609267 | LOC10013141 | red | 0.020221291  | 0.920256231 | PTGS2      | tan | 0.112505 | 0.584244 |
| KLHDC3    | red | -0.10512 | 0.609311 | PGAP3       | red | 0.023104102  | 0.908931269 | RCSO1      | tan | -0.10955 | 0.594209 |
| DOCK4     | red | 0.105005 | 0.609699 | GSKIP       | red | 0.0241481    | 0.904834147 | CARD11     | tan | -0.10882 | 0.596685 |
| TMCO1     | red | 0.104312 | 0.612073 | TREM1       | red | 0.02457714   | 0.903151082 | IL8        | tan | -0.10742 | 0.601435 |
| PHTT1     | red | -0.10411 | 0.612771 | METTL13     | red | 0.026153702  | 0.896970009 | CD300E     | tan | -0.10692 | 0.603167 |
| EEF1G     | red | -0.10383 | 0.61372  | PRPSAP2     | red | 0.03445164   | 0.864541864 | MAP7D3     | tan | -0.10552 | 0.60792  |
| INCENP    | red | -0.10354 | 0.61472  | ATP5O       | red | 0.034821289  | 0.863101862 | IL18       | tan | -0.10511 | 0.609327 |
| PHACTR4   | red | 0.102784 | 0.617322 | SSR4        | red | 0.043909288  | 0.827843851 | EEPD1      | tan | -0.10244 | 0.618504 |
| CLDN12    | red | 0.101758 | 0.620858 | HMGCS1      | red | 0.050124103  | 0.803914635 | VEGFA      | tan | -0.10153 | 0.621654 |
| TGFB1     | red | -0.10088 | 0.623873 | RNASET2     | red | 0.052879313  | 0.79335971  | LGALS3     | tan | -0.10115 | 0.622948 |
| VP58      | red | -0.09924 | 0.629575 | FAM40A      | red | 0.057189387  | 0.776919935 | LAMB3      | tan | 0.10083  | 0.624064 |
| STTB      | red | -0.09904 | 0.630271 | GAS2L1      | red | 0.062354525  | 0.757342104 | PKA        | tan | -0.10009 | 0.626639 |
| E1F4EBP2  | red | 0.098368 | 0.632596 | ZNF542      | red | 0.064806832  | 0.748097038 | RGN1       | tan | -0.09955 | 0.628477 |
| PIGQ      | red | -0.09678 | 0.638116 | SERPINF2    | red | 0.076445727  | 0.704700545 | MGC12916   | tan | -0.09797 | 0.633986 |
| SSRP1     | red | 0.096367 | 0.639569 | N4BP2L1     | red | 0.079816939  | 0.692290637 | AKR1C2     | tan | -0.09697 | 0.63746  |
| GTPBP6    | red | -0.09635 | 0.639629 | LEPROTL1    | red | 0.080463935  | 0.689917682 | ADAMTS15   | tan | -0.09532 | 0.643231 |
| HEATR7A   | red | 0.095973 | 0.640945 | ADH5        | red | 0.083172146  | 0.68001615  | LMTK2      | tan | -0.09298 | 0.651444 |
| LASP1     | red | 0.094724 | 0.645312 | TMEM229B    | red | 0.087643945  | 0.663780181 | ANKMY2     | tan | -0.09282 | 0.651986 |
| POMGN1    | red | 0.093555 | 0.649413 | PMM1        | red | 0.092277586  | 0.647111566 | MAP1LC3A   | tan | 0.092086 | 0.654582 |
| ARHGFE2   | red | 0.091354 | 0.657161 | ZNF75A      | red | 0.093881492  | 0.641379816 | CD274      | tan | 0.08998  | 0.662015 |
| SPG7      | red | 0.090697 | 0.659481 | RPS6KB1     | red | 0.094082833  | 0.640661706 | HMOX1      | tan | -0.08792 | 0.669305 |
| CECR5     | red | 0.090582 | 0.659885 | FAM203A     | red | 0.094687207  | 0.638508022 | EDN1       | tan | -0.08721 | 0.671825 |
| TAOK3     | red | -0.09054 | 0.660033 | RNF135      | red | 0.094993955  | 0.637416018 | ADORA2B    | tan | -0.0864  | 0.674728 |
| SF3B5     | red | -0.08945 | 0.66639  | NICN1       | red | 0.100561522  | 0.617726059 | IL18       | tan | -0.0833  | 0.685782 |
| SNX33     | red | 0.088739 | 0.666412 | KARS        | red | 0.104907556  | 0.602532399 | GAS7       | tan | -0.0819  | 0.690824 |
| DNAJC7    | red | 0.086675 | 0.673745 | TRAPPC5     | red | 0.106077142  | 0.5984707   | SLC39A8    | tan | -0.08186 | 0.690978 |
| SNRN40    | red | -0.08423 | 0.682453 | THAP10      | red | 0.106557941  | 0.596804388 | ABRACL     | tan | -0.07954 | 0.699308 |
| RAP2B     | red | 0.083784 | 0.684065 | DAPK1       | red | 0.108236521  | 0.591002599 | PXMP2      | tan | 0.079208 | 0.700516 |
| SFXN5     | red | 0.08339  | 0.685478 | PRPF38B     | red | 0.111024904  | 0.581418932 | ZFYVE26    | tan | 0.078207 | 0.704133 |
| SCAMP4    | red | 0.081649 | 0.691724 | CIQA        | red | 0.114919986  | 0.568147195 | DOK2       | tan | -0.07819 | 0.704206 |
| SLC25A17  | red | -0.07926 | 0.700335 | RAB11FIP3   | red | 0.115341861  | 0.566717945 | NFKB1      | tan | 0.077935 | 0.705114 |
| ATP5C1    | red | -0.07724 | 0.707615 | MXD4        | red | 0.116479692  | 0.562871233 | LOC1002895 | tan | -0.07559 | 0.713601 |
| MTFP1     | red | -0.07474 | 0.716721 | CIQB        | red | 0.119515199  | 0.55266726  | SOBP       | tan | 0.068032 | 0.741236 |
| NAT9      | red | 0.073777 | 0.720209 | PTPLAD1     | red | 0.119724468  | 0.551966947 | CCL20      | tan | -0.06796 | 0.741485 |
| PMS2L2    | red | -0.07116 | 0.729765 | ZNF839      | red | 0.121087794  | 0.547414648 | TREM2      | tan | 0.067345 | 0.743762 |
| LMBRL1    | red | 0.070309 | 0.732881 | S100P       | red | 0.121550711  | 0.545872894 | ABHD6      | tan | 0.066679 | 0.746212 |
| ARHGFE28  | red | -0.06974 | 0.734969 | MLKL        | red | 0.123342613  | 0.539924046 | ST3GAL4    | tan | -0.0623  | 0.762389 |
| WAC       | red | -0.06815 | 0.740794 | C14orf159   | red | 0.123794517  | 0.538428616 | ZNF117     | tan | 0.06196  | 0.763652 |
| RFNG      | red | -0.06778 | 0.742175 | PRADC1      | red | 0.126021787  | 0.53108681  | CD14       | tan | 0.061672 | 0.764722 |
| TAPT1     | red | -0.06691 | 0.745367 | TRMT1       | red | 0.130163167  | 0.517563512 | GSR        | tan | 0.061329 | 0.765994 |
| KIF3A     | red | -0.06569 | 0.749848 | RPP21       | red | 0.131184256  | 0.514255153 | FABP5      | tan | 0.060625 | 0.768609 |
| YTHDF1    | red | 0.065438 | 0.750789 | YHTPA       | red | 0.134518446  | 0.503524647 | MEMO1      | tan | 0.059063 | 0.774416 |
| AP551     | red | -0.06327 | 0.758788 | RPAIN       | red | 0.135823834  | 0.499353939 | ISG20      | tan | 0.058334 | 0.777131 |
| TMUB2     | red | 0.063125 | 0.759336 | CCDC102B    | red | 0.136764168  | 0.496360283 | SEMA4D     | tan | -0.05822 | 0.777548 |
| C7orf55   | red | 0.060792 | 0.767987 | ZWINT       | red | 0.137204212  | 0.49496245  | NR4A2      | tan | -0.05751 | 0.780186 |
| E1F2B5    | red | -0.05963 | 0.772319 | CDR2        | red | 0.13754304   | 0.493887482 | DDX10      | tan | 0.057183 | 0.781424 |
| EEA1      | red | -0.0589  | 0.775024 | CSNK2A1     | red | 0.137714671  | 0.493343412 | CDA        | tan | -0.05655 | 0.783787 |
| RIN2      | red | 0.052165 | 0.800205 | SSH2        | red | 0.142920338  | 0.4769857   | RAB42      | tan | 0.056535 | 0.783843 |
| NFKB1L1   | red | -0.05162 | 0.802249 | C1orf54     | red | 0.148593861  | 0.459480629 | SLC22A5    | tan | -0.05628 | 0.78481  |
| IER3IP1   | red | -0.05048 | 0.806534 | PPM1N       | red | 0.150043955  | 0.455061381 | CEP135     | tan | 0.054528 | 0.791348 |
| PPP1R16A  | red | -0.04921 | 0.811317 | TIMM17B     | red | 0.152502721  | 0.447619776 | IL1A       | tan | -0.05308 | 0.796777 |
| CUEDC2    | red | 0.048848 | 0.812683 | ZNF90       | red | 0.15271445   | 0.44698202  | PRPF8      | tan | 0.052161 | 0.800221 |
| ANGEL1    | red | 0.048725 | 0.813146 | LMAN2L      | red | 0.154431421  | 0.441828206 | C15orf48   | tan | -0.05098 | 0.804654 |
| SCAP      | red | 0.04851  | 0.813954 | SPPL2B      | red | 0.155755294  | 0.43787626  | PIK3AP1    | tan | -0.05044 | 0.806697 |
| TNIP2     | red | -0.04752 | 0.817697 | EPHB6       | red | 0.158727919  | 0.429072492 | SLAMF7     | tan | -0.04978 | 0.809168 |
| NUP35     | red | -0.04751 | 0.817741 | APOE        | red | 0.160609204  | 0.42355116  | CLCN4      | tan | -0.04932 | 0.810913 |
| TREM1     | red | -0.04525 | 0.826258 | KIAA1147    | red | 0.162395333  | 0.418345415 | MARCKS     | tan | -0.04921 | 0.811309 |
| PPP1R18   | red | 0.044388 | 0.829525 | ZBTB5       | red | 0.167351842  | 0.404086168 | NEURL3     | tan | -0.0485  | 0.81398  |
| WDR81     | red | 0.043706 | 0.83211  | HINT2       | red | 0.167579593  | 0.403447953 | COQ10A     | tan | -0.0477  | 0.817024 |
| DDX56     | red | 0.042383 | 0.837124 | LOC728431   | red | 0.169376471  | 0.398341112 | CD22       | tan | 0.04736  | 0.818292 |
| ZNF736    | red | -0.03801 | 0.853724 | MANBA       | red | 0.171335636  | 0.392826043 | PELI3      | tan | 0.045317 | 0.826011 |
| FBXO21    | red | 0.034975 | 0.865311 | THOC1       | red | 0.178009083  | 0.374369172 | KIAA0040   | tan | -0.04509 | 0.826885 |
| NMRAL1    | red | -0.03273 | 0.8      |             |     |              |             |            |     |          |          |

Table 6. Gene module membership and correlation with growth rate (48/72h), with adjusted p values for each module

|           |           |          |          |           |     |             |             |          |           |          |          |
|-----------|-----------|----------|----------|-----------|-----|-------------|-------------|----------|-----------|----------|----------|
| ZBTB8A    | red       | 0.028346 | 0.89067  | PDE1B     | red | 0.187893858 | 0.347975877 | MGST3    | tan       | 0.039571 | 0.847802 |
| KLHL22    | red       | 0.02746  | 0.894071 | FAM129A   | red | 0.191381471 | 0.338935724 | ABCG2    | tan       | 0.039314 | 0.848779 |
| OGG1      | red       | 0.027109 | 0.895416 | SLC7A6OS  | red | 0.193828582 | 0.332677914 | BLVRB    | tan       | -0.03876 | 0.850882 |
| KIAA0195  | red       | 0.027084 | 0.89551  | OPHN1     | red | 0.194024695 | 0.332179461 | GAS2L3   | tan       | -0.0381  | 0.853398 |
| RPL26L1   | red       | 0.025995 | 0.899693 | ZNF174    | red | 0.194411288 | 0.331198196 | PTGES    | tan       | 0.037387 | 0.856114 |
| ZNF641    | red       | 0.025307 | 0.902332 | XPC       | red | 0.194961244 | 0.329805314 | GCH1     | tan       | 0.035793 | 0.86219  |
| ARHGAP33  | red       | -0.02492 | 0.903811 | LUC7L3    | red | 0.197942371 | 0.322317066 | NCF1B    | tan       | -0.0338  | 0.869804 |
| C16orf58  | red       | -0.02295 | 0.91141  | GPX1      | red | 0.198047223 | 0.322055601 | JAK3     | tan       | 0.031371 | 0.879085 |
| GLT1D1    | red       | -0.0224  | 0.913499 | CEBPA     | red | 0.198218943 | 0.321627668 | B4GALT1  | tan       | 0.030247 | 0.883387 |
| ABHD16A   | red       | -0.02114 | 0.91836  | RAB35     | red | 0.199384753 | 0.318731657 | SNTA1    | tan       | 0.029431 | 0.886512 |
| RASAL3    | red       | 0.020743 | 0.919887 | PHF20L1   | red | 0.199739378 | 0.317853914 | TNFAIP6  | tan       | 0.029209 | 0.887363 |
| PDXP      | red       | -0.02069 | 0.920085 | TAX1BP3   | red | 0.201018435 | 0.31470045  | SLC2A3   | tan       | -0.02425 | 0.906413 |
| HSD17B7P2 | red       | 0.019341 | 0.925286 | ZNF230    | red | 0.204302426 | 0.30669266  | PLSCR1   | tan       | -0.02343 | 0.909547 |
| TRIM62    | red       | 0.018602 | 0.928132 | PTGFRN    | red | 0.207513427 | 0.298986536 | RCBTB2   | tan       | 0.021359 | 0.917513 |
| NSUN4     | red       | 0.017573 | 0.932097 | LAGE3     | red | 0.207961391 | 0.297921191 | SOC3     | tan       | -0.01981 | 0.923483 |
| ADCK3     | red       | 0.015531 | 0.939973 | BECN1     | red | 0.209321154 | 0.294702005 | SERINC5  | tan       | -0.01936 | 0.925199 |
| CPNE2     | red       | -0.01496 | 0.942177 | TXN2      | red | 0.210428879 | 0.292095747 | CEP78    | tan       | 0.018663 | 0.927897 |
| FERM12    | red       | -0.01282 | 0.950457 | PCYOX1L   | red | 0.214489748 | 0.282666017 | COTL1    | tan       | -0.01804 | 0.930292 |
| PEX13     | red       | -0.01231 | 0.952425 | TELO2     | red | 0.215292074 | 0.2793708   | NBN      | tan       | -0.01751 | 0.932328 |
| C6orf89   | red       | -0.01183 | 0.954264 | NAA38     | red | 0.218162911 | 0.274305361 | NCF1     | tan       | 0.017483 | 0.932444 |
| GOLM1     | red       | -0.01155 | 0.955354 | CBR4      | red | 0.218875247 | 0.272702535 | APOBEC3A | tan       | 0.016519 | 0.936163 |
| XPO4      | red       | -0.01047 | 0.95951  | DPEP2     | red | 0.219449983 | 0.271413715 | TSC2D1   | tan       | -0.01533 | 0.940747 |
| CDC93     | red       | 0.009    | 0.965195 | SERPINA1  | red | 0.219765137 | 0.27070866  | PLA2G15  | tan       | -0.01495 | 0.942233 |
| RUNX3     | red       | 0.008924 | 0.96549  | VAPA      | red | 0.219935183 | 0.270328728 | FBN1     | tan       | 0.014618 | 0.943497 |
| SUMF2     | red       | -0.00725 | 0.971978 | DNITP1    | red | 0.223209677 | 0.263079474 | PDE4B    | tan       | 0.013004 | 0.949728 |
| PMS2P3    | red       | 0.006375 | 0.975341 | HMG20A    | red | 0.223863766 | 0.261646654 | PLTP     | tan       | -0.01253 | 0.951545 |
| AGTRAP    | red       | 0.005958 | 0.976955 | RAB13     | red | 0.225341515 | 0.25842823  | AK4      | tan       | -0.0111  | 0.957099 |
| CARHSP1   | red       | 0.005322 | 0.979416 | BACE1     | red | 0.225473335 | 0.258142393 | EREG     | tan       | -0.01041 | 0.959744 |
| ATG2A     | red       | 0.004808 | 0.981401 | LOC253039 | red | 0.225829909 | 0.257370231 | CP       | tan       | -0.01013 | 0.960823 |
| CHML      | red       | -0.00456 | 0.982362 | CAPG      | red | 0.233948978 | 0.240195115 | ECE1     | tan       | 0.010093 | 0.96097  |
| ANKS3     | red       | -0.00351 | 0.986438 | POGZ      | red | 0.234413002 | 0.239237004 | SNHG12   | tan       | 0.009028 | 0.965087 |
| SHROOM3   | royalblue | -0.37148 | 0.061686 | ZNF593    | red | 0.239092091 | 0.229717023 | CD9      | tan       | 0.006771 | 0.973811 |
| LYPD3     | royalblue | -0.36449 | 0.067144 | LPXN      | red | 0.240868377 | 0.226170216 | HAMP     | tan       | 0.006451 | 0.975051 |
| CCL20     | royalblue | -0.36439 | 0.067224 | TRIP6     | red | 0.24211061  | 0.22371169  | COQ2     | tan       | -0.0062  | 0.976025 |
| C4orf72   | royalblue | -0.35809 | 0.07246  | HNMT      | red | 0.243810187 | 0.220377177 | INHBA    | tan       | -0.00606 | 0.976568 |
| SERPINB2  | royalblue | -0.3012  | 0.13485  | PQLC3     | red | 0.24432867  | 0.219366628 | RAB21    | tan       | -0.0058  | 0.977575 |
| NFE2      | royalblue | -0.28821 | 0.153337 | STK16     | red | 0.24679274  | 0.214606726 | STAP2    | tan       | 0.005066 | 0.980406 |
| IRF1      | royalblue | -0.28144 | 0.163675 | UBE2V1    | red | 0.249045963 | 0.210315721 | OSM      | tan       | -0.00374 | 0.985537 |
| ZNF267    | royalblue | 0.27081  | 0.180859 | EPS8L1    | red | 0.249690106 | 0.20909981  | OSBP11   | tan       | 0.0036   | 0.986074 |
| KCNNA4    | royalblue | -0.26253 | 0.195092 | KHDRBS1   | red | 0.250956273 | 0.206723695 | MOSPD2   | tan       | 0.002843 | 0.989003 |
| PTX3      | royalblue | -0.24158 | 0.234457 | MYNN      | red | 0.251540433 | 0.205633673 | TLR2     | tan       | -0.00275 | 0.98936  |
| KIAA0922  | royalblue | -0.23988 | 0.237866 | HCLS1     | red | 0.252202526 | 0.204402976 | SERPINF1 | tan       | 0.002207 | 0.991463 |
| TRAF3     | royalblue | 0.231652 | 0.254837 | COQ4      | red | 0.252547133 | 0.203764416 | CSF2RB   | tan       | -0.0011  | 0.995737 |
| CDC134    | royalblue | -0.21348 | 0.295047 | ELMOD3    | red | 0.252662245 | 0.203551416 | RNF8     | turquoise | -0.5808  | 0.001864 |
| TNFAIP8   | royalblue | -0.21166 | 0.29926  | CNNM3     | red | 0.253510671 | 0.201986203 | NCBP1    | turquoise | -0.49953 | 0.009371 |
| KYNU      | royalblue | 0.203726 | 0.318167 | BBS2      | red | 0.255097665 | 0.199080597 | ACO2     | turquoise | -0.47254 | 0.014781 |
| IL6       | royalblue | -0.19005 | 0.352412 | RBCK1     | red | 0.255505002 | 0.198339457 | AGAP2    | turquoise | -0.47231 | 0.014837 |
| CCL4      | royalblue | -0.18809 | 0.357504 | SUPT5H    | red | 0.256198852 | 0.197081375 | PRKAB2   | turquoise | -0.45242 | 0.020306 |
| BHLHE41   | royalblue | -0.18591 | 0.363182 | MBNL3     | red | 0.256458134 | 0.196612659 | FAM89A   | turquoise | -0.4428  | 0.023491 |
| SLC11A2   | royalblue | -0.18552 | 0.36422  | ALKBH8    | red | 0.257326025 | 0.195049304 | MMP12    | turquoise | -0.4072  | 0.038953 |
| PDE4B     | royalblue | -0.1822  | 0.373004 | CUL2      | red | 0.260722299 | 0.189013824 | RANBP1   | turquoise | -0.38338 | 0.053198 |
| ABCA1     | royalblue | 0.179357 | 0.380647 | NDUF53    | red | 0.261012108 | 0.188504861 | FLVCR1   | turquoise | -0.37335 | 0.060288 |
| CA2       | royalblue | -0.16828 | 0.411232 | ING4      | red | 0.262093713 | 0.186613723 | LPP      | turquoise | -0.37009 | 0.062745 |
| CCL3L3    | royalblue | 0.164993 | 0.420548 | FTO       | red | 0.262746445 | 0.185478837 | TMEM14B  | turquoise | -0.36892 | 0.063646 |
| AMPD3     | royalblue | -0.15087 | 0.461938 | SYT11     | red | 0.264146323 | 0.18306108  | NUP155   | turquoise | -0.36707 | 0.065089 |
| LAMC1     | royalblue | -0.14996 | 0.464659 | BATF3     | red | 0.26417488  | 0.183011989 | FAM89B   | turquoise | -0.36353 | 0.067927 |
| TMEM53    | royalblue | -0.14949 | 0.466087 | CASC4     | red | 0.264677551 | 0.18214935  | FUOM     | turquoise | -0.36192 | 0.069241 |
| FBXL2     | royalblue | 0.144441 | 0.481438 | OGFOD1    | red | 0.265660824 | 0.180470134 | C11orf31 | turquoise | -0.36029 | 0.070596 |
| C5orf45   | royalblue | -0.14198 | 0.489012 | RNF7      | red | 0.266410585 | 0.179196979 | PPCS     | turquoise | -0.35607 | 0.074205 |
| IL18BP    | royalblue | -0.1386  | 0.499525 | HP56      | red | 0.269066742 | 0.174737069 | C7orf41  | turquoise | -0.35508 | 0.075074 |
| KIAA1009  | royalblue | -0.13859 | 0.499546 | ASPSR1    | red | 0.269632541 | 0.173797182 | C12orf44 | turquoise | -0.35399 | 0.076028 |
| GPR132    | royalblue | -0.13604 | 0.507553 | C22orf28  | red | 0.27180537  | 0.170220698 | GOSR2    | turquoise | -0.35165 | 0.078126 |
| CCR12     | royalblue | 0.135592 | 0.508968 | KCTD20    | red | 0.271952054 | 0.169981135 | KLHL18   | turquoise | -0.34921 | 0.080364 |
| JAKMIP2   | royalblue | -0.12947 | 0.528448 | MIS18BP1  | red | 0.27610671  | 0.16329398  | TMEM214  | turquoise | -0.34553 | 0.083821 |
| SNX9      | royalblue | 0.129287 | 0.529044 | EDF1      | red | 0.27781223  | 0.160603478 | HNRNPUL2 | turquoise | -0.34366 | 0.085626 |
| CCR7      | royalblue | -0.12175 | 0.553538 | C9orf78   | red | 0.281500128 | 0.154893519 | ATPBD4   | turquoise | -0.3422  | 0.087046 |
| MFS2A2    | royalblue | 0.114441 | 0.577751 | TMEM14A   | red | 0.281683621 | 0.154613248 | STX2     | turquoise | -0.34114 | 0.088092 |
| SPDL1     | royalblue | -0.11177 | 0.586724 | ZNF642    | red | 0.281746468 | 0.154517336 | UBLA4    | turquoise | -0.33905 | 0.090191 |
| PLEKHM3   | royalblue | 0.111067 | 0.58909  | FAM156B   | red | 0.282594442 | 0.153227386 | SUMO1    | turquoise | -0.33827 | 0.090974 |
| CCL3      | royalblue | -0.10683 | 0.603449 | LINC00641 | red | 0.286294541 | 0.147688639 | OSGIN1   | turquoise | -0.32855 | 0.101263 |
| TNFSF15   | royalblue | -0.10395 | 0.613317 | MLF2      | red | 0.286923019 | 0.146762315 | SRSF4    | turquoise | -0.32355 | 0.106882 |
| KLHL5     | royalblue | -0.10289 | 0.616944 | MTMR1     | red | 0.292813404 | 0.138282314 | TAF10    | turquoise | -0.31927 | 0.111878 |
| CHD3      | royalblue | 0.102733 | 0.617499 | RNF20     | red | 0.293674134 | 0.137073496 | CPT1A    | turquoise | -0.31898 | 0.112219 |
| MSR1      | royalblue | -0.1001  | 0.6266   | ZNF629    | red | 0.294550952 | 0.135849967 | CDC23    | turquoise | -0.31765 | 0.113806 |
| KANK1     | royalblue | -0.09999 | 0.626961 | CUL1      | red | 0.296401819 | 0.133293246 | ZNF197   | turquoise | -0.31728 | 0.114246 |
| RPSAP58   | royalblue | 0.092699 | 0.652423 | MLH1      | red | 0.300964914 | 0.12713952  | NECAB3   | turquoise | -0.31706 | 0.114511 |
| C19orf10  | royalblue | 0.086284 | 0.675137 | VPS33B    | red | 0.302176165 | 0.125541467 | MTERF    | turquoise | -0.31645 | 0.115256 |
| DDX43     | royalblue | -0.08376 | 0.68416  | TYMP      | red | 0.302207823 | 0.125499897 | PHC2     | turquoise | -0.31626 | 0.115489 |
| PDE7A     | royalblue | 0.083172 | 0.686257 | ATPS1     | red | 0.305593824 | 0.121111644 | MYC      | turquoise | -0.31609 | 0.115694 |
| MIR155HG  | royalblue | -0.07914 | 0.700762 | ACSF3     | red | 0.305600069 | 0.121103656 | FLT1     | turquoise | -0.3118  | 0.120996 |
| RAB20     | royalblue | 0.077471 | 0.706796 | TRIM66    | red | 0.30703945  | 0.119272832 | LFNG     | turquoise | -0.31052 | 0.122609 |
| IRAK2     | royalblue | 0.077026 | 0.708405 | NUCK1S    | red | 0.307107173 | 0.119187196 | KATNAL1  | turquoise | -0.30943 | 0.123992 |
| KDM6B     | royalblue | 0.074532 | 0.717463 | IRF3      | red | 0.307951114 | 0.118123815 | CP5F2    | turquoise | -0.3089  | 0.124667 |
| CSF2      | royalblue | -0.07431 | 0.718269 | C9orf142  | red | 0.30928242  | 0.116460566 | RAC1     | turquoise | -0.3088  | 0.124796 |
| ZC3H12C   | royalblue | -0.07297 | 0.723143 | MORC2     | red | 0.315622082 | 0.10877632  | TPM1     | turquoise | -0.30846 | 0.125242 |
| TNFAIP6   | royalblue | -0.07069 | 0.731498 | VMO1      | red | 0.315990764 | 0.108341322 | EEF1B2   | turquoise | -0.30617 | 0.128215 |
| NFKB2     | royalblue | -0.06723 | 0.744172 | CAMLG     | red | 0.317622621 | 0.106431439 | GTPBP8   | turquoise | -0.3056  | 0.128958 |
| RG51      | royalblue | -0.06497 | 0.752519 | MRLP46    | red | 0.32074734  | 0.102844401 | RACGAP1  | turquoise | -0.30298 | 0.132445 |
| COL6A2    | royalblue | -0.06479 | 0.753195 | IFT52     | red | 0.321161404 | 0.102375929 | LRFN4    | turquoise | -0.3015  | 0.134438 |
| EBP       | royalblue | 0.06047  | 0.769185 | TOMM22    | red | 0.322099094 | 0.101320917 | VPS26A   | turquoise | -0.2983  | 0.138825 |
| GEM       | royalblue | -0.05924 | 0.773753 | TUBG2     | red | 0.322994854 | 0.100320689 | XPA      | turquoise | -0.29667 | 0.141102 |
| GNGT2     | royalblue | 0.058167 | 0.777755 | PARVG     | red | 0.323462074 | 0.09980192  | MICU1    | turquoise | -0.29586 | 0.142244 |
| SPR1E2    | royalblue | -0.05306 | 0.796832 | SLC25A11  | red | 0.323893908 | 0.099324228 | HAUS8    | turquoise | -0.29563 | 0.142571 |
| TMEM63B   | royalblue | 0.051503 | 0.80     |           |     |             |             |          |           |          |          |

Table 6. Gene module membership and correlation with growth rate (48/72h), with adjusted p values for each module

|           |           |          |          |             |           |              |             |            |           |          |          |
|-----------|-----------|----------|----------|-------------|-----------|--------------|-------------|------------|-----------|----------|----------|
| MHAS1     | royalblue | 0.034194 | 0.86829  | VPS4A       | red       | 0.34020427   | 0.082506161 | TMEM2      | turquoise | -0.28262 | 0.161832 |
| TMEM88    | royalblue | -0.02965 | 0.885674 | APEH        | red       | 0.343282646  | 0.07959114  | GUSBP3     | turquoise | -0.28072 | 0.16479  |
| PTPRJ     | royalblue | -0.02813 | 0.891487 | FAM204A     | red       | 0.343581856  | 0.079312053 | ERGIC1     | turquoise | -0.27954 | 0.166654 |
| SOD2      | royalblue | 0.025356 | 0.902144 | RHBDD3      | red       | 0.350828544  | 0.072778121 | MRP510     | turquoise | -0.27925 | 0.167108 |
| CYP51A1   | royalblue | -0.02215 | 0.914488 | EXOSC3      | red       | 0.351933473  | 0.071819318 | MRP53      | turquoise | -0.27902 | 0.167485 |
| PE6G      | royalblue | 0.018678 | 0.92784  | MAEA        | red       | 0.354711605  | 0.069451477 | ZNF576     | turquoise | -0.27835 | 0.168546 |
| LIF       | royalblue | 0.015323 | 0.940778 | DCPS        | red       | 0.354985777  | 0.069221098 | LRR378P1   | turquoise | -0.27573 | 0.172758 |
| TNP1      | royalblue | -0.01455 | 0.943779 | GD1         | red       | 0.355099188  | 0.069125974 | PUS10      | turquoise | -0.27472 | 0.174402 |
| ZSWIM4    | royalblue | -0.01278 | 0.950582 | BR138P      | red       | 0.36193281   | 0.063577829 | TM75F3     | turquoise | -0.27394 | 0.17568  |
| LINC00152 | royalblue | -0.00998 | 0.961392 | RBMX        | red       | 0.362099008  | 0.063447332 | ATP9A      | turquoise | -0.27388 | 0.175778 |
| RHOH      | royalblue | -0.00753 | 0.970868 | PLAUR       | red       | 0.366087406  | 0.060377498 | LOC1005070 | turquoise | -0.27384 | 0.175829 |
| CD9       | royalblue | -0.00579 | 0.977597 | AMDHD2      | red       | 0.366282104  | 0.060230652 | THUMP2     | turquoise | -0.27281 | 0.177539 |
| ZFX       | royalblue | 0.004861 | 0.981197 | SOAT1       | red       | 0.366611609  | 0.059982766 | GPS2       | turquoise | -0.2724  | 0.178202 |
| HIST1H2BH | salmon    | -0.61395 | 0.00085  | RPL37       | red       | 0.372604508  | 0.055611317 | PTPN18     | turquoise | -0.27173 | 0.179327 |
| HIST1H2AG | salmon    | -0.48264 | 0.012516 | ZSCAN1      | red       | 0.372702837  | 0.055541729 | FSCN1      | turquoise | -0.27088 | 0.180737 |
| PSME1     | salmon    | -0.48081 | 0.012903 | UBE2E1      | red       | 0.373958883  | 0.05465879  | LIMA1      | turquoise | -0.27062 | 0.181175 |
| HIST3H2A  | salmon    | -0.45442 | 0.019693 | DCUN1D2     | red       | 0.377915837  | 0.051948869 | ZNF270     | turquoise | -0.27012 | 0.182022 |
| HIST1H2AV | salmon    | -0.44805 | 0.021705 | SLC20A1     | red       | 0.384328972  | 0.047781952 | ZNF623     | turquoise | -0.26943 | 0.183178 |
| FIGN1L    | salmon    | -0.44346 | 0.02326  | GPNMB       | red       | 0.385794795  | 0.046867608 | OXS1R      | turquoise | -0.26809 | 0.185446 |
| PCMTD2    | salmon    | -0.42609 | 0.029972 | ZNRD1       | red       | 0.386427292  | 0.046477364 | SNRNP25    | turquoise | -0.26768 | 0.186147 |
| SLC7A1    | salmon    | 0.411873 | 0.036557 | CNNM1       | red       | 0.390544252  | 0.043999544 | MCEE       | turquoise | -0.2668  | 0.18766  |
| HIST1H3C  | salmon    | -0.39829 | 0.043878 | CHMP2B      | red       | 0.393814359  | 0.042106949 | DECR1      | turquoise | -0.26617 | 0.188739 |
| TXNL4A    | salmon    | -0.386   | 0.051455 | RAPGEFL1    | red       | 0.395719135  | 0.041034696 | UBXN2B     | turquoise | -0.26587 | 0.189253 |
| HIST1H3G  | salmon    | -0.3853  | 0.051917 | EMG1        | red       | 0.397730365  | 0.039926188 | FSTDJ1     | turquoise | -0.26511 | 0.190578 |
| ZYG11B    | salmon    | -0.38456 | 0.052408 | EIF2D       | red       | 0.398172494  | 0.03968573  | SGOL2      | turquoise | -0.26322 | 0.193869 |
| HIST1H3B  | salmon    | -0.37295 | 0.060589 | PLA2G16     | red       | 0.399474494  | 0.03898431  | AGPAT3     | turquoise | -0.26142 | 0.197046 |
| TMEM223   | salmon    | -0.37114 | 0.061946 | LOC10050631 | red       | 0.399948304  | 0.038731522 | ANP32E     | turquoise | -0.26035 | 0.198965 |
| HIST1H2AJ | salmon    | -0.3708  | 0.062205 | CCDC51      | red       | 0.404551972  | 0.036342767 | SLC11A1    | turquoise | -0.25861 | 0.202083 |
| SNORA12   | salmon    | -0.36472 | 0.066959 | RPL22       | red       | 0.40704365   | 0.035099894 | PPT1       | turquoise | -0.25801 | 0.203168 |
| CDT1      | salmon    | -0.36341 | 0.068019 | C7orf50     | red       | 0.40842421   | 0.03442615  | SRD5A3     | turquoise | -0.25734 | 0.204383 |
| FICD      | salmon    | 0.357635 | 0.072851 | SETDB1      | red       | 0.409244246  | 0.034030735 | NCOR1      | turquoise | -0.25645 | 0.206015 |
| ECHDC2    | salmon    | -0.35279 | 0.077102 | PRMT1       | red       | 0.414688581  | 0.03149755  | PITPN1C    | turquoise | -0.25624 | 0.206398 |
| COMM1D10  | salmon    | -0.34918 | 0.080389 | PRRC2B      | red       | 0.416471383  | 0.030701829 | MSH3       | turquoise | -0.2562  | 0.206474 |
| SLC30A1   | salmon    | 0.347479 | 0.081977 | CNPY3       | red       | 0.417819267  | 0.03011104  | LYRM5      | turquoise | -0.25527 | 0.208187 |
| PDE4DIP   | salmon    | 0.342451 | 0.086804 | BIN3        | red       | 0.417838604  | 0.030102631 | LILRB5     | turquoise | -0.25479 | 0.209069 |
| CCNB1IP1  | salmon    | -0.34158 | 0.087657 | FASTKD2     | red       | 0.422508774  | 0.028126606 | PRPF6      | turquoise | -0.25454 | 0.209527 |
| HIST3H2BB | salmon    | -0.33446 | 0.09491  | DDX49       | red       | 0.424252559  | 0.027416236 | ARPC1B     | turquoise | -0.25381 | 0.210883 |
| BLOC1S5   | salmon    | -0.33038 | 0.099266 | SNRNP48     | red       | 0.426659489  | 0.026459639 | GNPAT      | turquoise | -0.25373 | 0.211024 |
| NOB1      | salmon    | -0.32778 | 0.102115 | FAM162A     | red       | 0.430172378  | 0.025112208 | RARS       | turquoise | -0.2527  | 0.212959 |
| C2orf71   | salmon    | -0.32386 | 0.106529 | HNRNPAB     | red       | 0.430430122  | 0.025015582 | VAMP7      | turquoise | -0.25197 | 0.214319 |
| CASP6     | salmon    | -0.31621 | 0.115549 | ATOX1       | red       | 0.43816749   | 0.022252536 | PAGR1      | turquoise | -0.25137 | 0.215458 |
| HIST2H2AB | salmon    | -0.29917 | 0.146075 | VCP         | red       | 0.438561649  | 0.022118786 | ECT2       | turquoise | -0.2512  | 0.215781 |
| AAK1      | salmon    | 0.292871 | 0.14651  | IFT43       | red       | 0.439709083  | 0.021732959 | C2orf68    | turquoise | -0.25106 | 0.21603  |
| SESN2     | salmon    | 0.291445 | 0.148577 | RPL11       | red       | 0.458208768  | 0.016234263 | RPL22L1    | turquoise | -0.251   | 0.216144 |
| PPAP2B    | salmon    | 0.278945 | 0.167597 | PSMC1       | red       | 0.459350966  | 0.015936414 | LDHA       | turquoise | -0.2504  | 0.217283 |
| LRRCS9    | salmon    | 0.275286 | 0.173475 | MRPL24      | red       | 0.464379324  | 0.014678244 | TMEM68     | turquoise | -0.25014 | 0.217775 |
| NDUFA7    | salmon    | -0.27124 | 0.180135 | WDFY2       | red       | 0.465135467  | 0.014496353 | DDX46      | turquoise | -0.24912 | 0.219733 |
| RRS1      | salmon    | -0.26252 | 0.195113 | ADAM15      | red       | 0.472496478  | 0.012821062 | TMTC4      | turquoise | -0.24906 | 0.219842 |
| IFIT5     | salmon    | -0.25844 | 0.202383 | COMT        | red       | 0.47270702   | 0.012775617 | COX11      | turquoise | -0.24811 | 0.221669 |
| ARCN1     | salmon    | 0.25776  | 0.203623 | MAGEH1      | red       | 0.476230293  | 0.012034748 | SMPDL3A    | turquoise | -0.24729 | 0.223236 |
| PDSS1     | salmon    | -0.25499 | 0.208698 | PHF23       | red       | 0.479136075  | 0.011450925 | HINT1      | turquoise | -0.24715 | 0.223509 |
| TARS      | salmon    | 0.253553 | 0.211361 | CHDH        | red       | 0.481482924  | 0.011007004 | EXTL3      | turquoise | -0.24615 | 0.225446 |
| BAIAP2    | salmon    | 0.252184 | 0.21392  | APRT        | red       | 0.484099059  | 0.010508328 | IPO9       | turquoise | -0.24499 | 0.227717 |
| TYMS      | salmon    | -0.24517 | 0.227358 | NDUFA1      | red       | 0.487814367  | 0.009845849 | TPP1       | turquoise | -0.24463 | 0.228425 |
| DYNLT1    | salmon    | -0.2446  | 0.228489 | FGGY        | red       | 0.498729374  | 0.008098101 | SH3YL1     | turquoise | -0.24445 | 0.228778 |
| FNIP2     | salmon    | 0.24143  | 0.234759 | ROMO1       | red       | 0.502085117  | 0.00761628  | POLR2C     | turquoise | -0.24444 | 0.228795 |
| SNX8      | salmon    | 0.241196 | 0.235228 | C10orf11    | red       | 0.505496907  | 0.007151348 | ATP5C1     | turquoise | -0.24371 | 0.23024  |
| MICALL1   | salmon    | 0.241171 | 0.235277 | TMEM219     | red       | 0.510548927  | 0.00650691  | FAM114A1   | turquoise | -0.24337 | 0.230895 |
| TSPAN13   | salmon    | -0.24008 | 0.237465 | DDX55       | red       | 0.517670884  | 0.005682102 | RPLP0      | turquoise | -0.24268 | 0.232278 |
| C1orf59   | salmon    | -0.23412 | 0.249667 | PFDN5       | red       | 0.520895676  | 0.005338796 | FAM104B    | turquoise | -0.24245 | 0.232732 |
| NIN1      | salmon    | -0.23038 | 0.25752  | RPS23       | red       | 0.545493522  | 0.003252034 | PYURF      | turquoise | -0.24091 | 0.235803 |
| PRRG4     | salmon    | -0.23008 | 0.258173 | RPL37A      | red       | 0.571062572  | 0.00186443  | GBAS       | turquoise | -0.24089 | 0.235839 |
| SNHG11    | salmon    | -0.22738 | 0.263945 | SNRPA1      | red       | 0.571670601  | 0.001838922 | ATG5       | turquoise | -0.24034 | 0.236952 |
| HYOU1     | salmon    | 0.222048 | 0.275614 | DEM1        | red       | 0.580399305  | 0.001504521 | RHOBTB1    | turquoise | -0.24    | 0.237624 |
| NRP2      | salmon    | 0.220506 | 0.279048 | LAMTOR2     | red       | 0.602093428  | 0.000891058 | ZDHHC20    | turquoise | -0.23994 | 0.237745 |
| COX5B     | salmon    | -0.21394 | 0.29398  | NDUFA3      | red       | 0.603910873  | 0.000851352 | SDF2L1     | turquoise | -0.23962 | 0.238399 |
| ADORA2B   | salmon    | 0.212546 | 0.297204 | NDUFB5      | red       | 0.607988403  | 0.00076782  | SNORA10    | turquoise | -0.23868 | 0.240298 |
| DISP1     | salmon    | 0.21003  | 0.303094 | SSH1        | royalblue | -0.574110122 | 0.001739578 | MRPL30     | turquoise | -0.23748 | 0.242735 |
| SGTA      | salmon    | 0.207461 | 0.309182 | KIFAP3      | royalblue | -0.46350785  | 0.014890215 | ETFA       | turquoise | -0.23739 | 0.242931 |
| C8B       | salmon    | -0.20632 | 0.311911 | MAMLD1      | royalblue | -0.442650156 | 0.020769171 | EIF4E      | turquoise | -0.23661 | 0.244516 |
| KIAA1804  | salmon    | 0.205477 | 0.313935 | YTF3C1      | royalblue | -0.428774176 | 0.025641677 | OFD1       | turquoise | -0.23591 | 0.245957 |
| HIST1H2AB | salmon    | -0.20255 | 0.32102  | GFHD2       | royalblue | -0.401013767 | 0.038167845 | PPP2R5A    | turquoise | -0.2359  | 0.245974 |
| CHRM4     | salmon    | -0.20097 | 0.324908 | NOL10       | royalblue | -0.330904084 | 0.091806952 | NCKIPSD    | turquoise | -0.23508 | 0.247673 |
| FAM83D    | salmon    | -0.19448 | 0.341095 | SPRED2      | royalblue | -0.315892764 | 0.108456823 | GORASP3    | turquoise | -0.23467 | 0.248533 |
| MSRB2     | salmon    | -0.19359 | 0.343347 | MS4A7       | royalblue | -0.311658345 | 0.11353523  | ACADM      | turquoise | -0.23451 | 0.248853 |
| MANF      | salmon    | 0.189839 | 0.352957 | USP42       | royalblue | -0.302761522 | 0.124774467 | CLF2       | turquoise | -0.23375 | 0.250441 |
| HIST1H2AH | salmon    | -0.18644 | 0.361796 | SMARCC2     | royalblue | -0.298019087 | 0.131087933 | EIF4E3     | turquoise | -0.23282 | 0.252372 |
| KLC1      | salmon    | 0.1829   | 0.371115 | DPP3        | royalblue | -0.297229475 | 0.13216131  | C11orf74   | turquoise | -0.23278 | 0.252463 |
| TMEM183A  | salmon    | -0.18187 | 0.3739   | HMBOX1      | royalblue | -0.239445363 | 0.229008687 | ATP6V1B2   | turquoise | -0.23173 | 0.254683 |
| PNPLA1    | salmon    | -0.18037 | 0.377926 | MYADM       | royalblue | -0.210090791 | 0.292889656 | HSD17B12   | turquoise | -0.23149 | 0.255189 |
| AP2S1     | salmon    | -0.17718 | 0.38655  | STX16       | royalblue | -0.175297808 | 0.38180621  | NAAL5      | turquoise | -0.23101 | 0.256193 |
| C1orf79   | salmon    | -0.17263 | 0.399043 | ISOC1       | royalblue | -0.161322938 | 0.421466699 | FASTKD1    | turquoise | -0.23072 | 0.256808 |
| HIST1H4A  | salmon    | -0.17175 | 0.401504 | PRRG1       | royalblue | -0.145609049 | 0.46864756  | MRPS28     | turquoise | -0.23032 | 0.257653 |
| HIST1H2BI | salmon    | -0.1715  | 0.4022   | ZFP1        | royalblue | -0.111460647 | 0.579928102 | NUP85      | turquoise | -0.22933 | 0.259764 |
| RETN      | salmon    | -0.1715  | 0.402202 | METTL14     | royalblue | -0.109267664 | 0.587450567 | DTWD1      | turquoise | -0.22928 | 0.25987  |
| C1orf63   | salmon    | -0.17129 | 0.402767 | LANCL1      | royalblue | -0.104024122 | 0.605608056 | ARL2       | turquoise | -0.22902 | 0.260435 |
| ABL1      | salmon    | 0.169769 | 0.407033 | NSD1        | royalblue | -0.07347402  | 0.715701452 | PAIP2      | turquoise | -0.22837 | 0.261819 |
| HIST1H3A  | salmon    | -0.16729 | 0.414029 | PPP1R14B    | royalblue | -0.061566983 | 0.760318089 | TRIM37     | turquoise | -0.22793 | 0.262756 |
| SNHG12    | salmon    | -0.16146 | 0.430698 | CDCAL7      | royalblue | -0.05872451  | 0.771086745 | FAM60A     | turquoise | -0.22623 | 0.266431 |
| MMP19     | salmon    | 0.160517 | 0.433435 | SNORA67     | royalblue | -0.053865406 | 0.789590605 | HCFC1R1    | turquoise | -0.22616 | 0.266583 |
| HBP1      | salmon    | -0.15665 | 0.444727 | HIST1H2BE   | royalblue | -0.051241295 | 0.799630632 | TFAM       | turquoise | -0.22604 | 0.266855 |
| DOT1L     | salmon    | 0.156302 | 0.445764 | NOMO1       | royalblue | -0.045219096 | 0.82278739  | TMEM65     | turquoise | -0.22558 | 0.267856 |
| RANBP6    | salmon    | -0.15168 | 0.459509 | FSTDJ2      | royalblue | -0.033134517 | 0.          |            |           |          |          |

Table 6. Gene module membership and correlation with growth rate (48/72h), with adjusted p values for each module

|           |         |          |          |           |           |              |             |           |           |          |          |
|-----------|---------|----------|----------|-----------|-----------|--------------|-------------|-----------|-----------|----------|----------|
| PAFAH1B1  | salmon  | -0.12995 | 0.526926 | FAM114A1  | royalblue | 0.118673457  | 0.555488255 | TTC1      | turquoise | -0.22192 | 0.275898 |
| EDN1      | salmon  | 0.129294 | 0.529021 | SNORA71C  | royalblue | 0.153199988  | 0.445521339 | BSC12     | turquoise | -0.22148 | 0.276885 |
| CLAR      | salmon  | 0.128627 | 0.531167 | SNORA70   | royalblue | 0.155412007  | 0.438899182 | FAM111A   | turquoise | -0.22091 | 0.27815  |
| TMEM11    | salmon  | 0.127285 | 0.535496 | NDUF811   | royalblue | 0.163264777  | 0.415824237 | GSN       | turquoise | -0.22078 | 0.278431 |
| ABC1      | salmon  | -0.12664 | 0.537598 | C17orf79  | royalblue | 0.164167552  | 0.413215344 | SRF       | turquoise | -0.22049 | 0.279085 |
| PINLYP    | salmon  | -0.12407 | 0.545945 | LSM7      | royalblue | 0.170430613  | 0.395368273 | C6orf162  | turquoise | -0.22005 | 0.280061 |
| TMEM217   | salmon  | 0.12256  | 0.55087  | GADD45GIP | royalblue | 0.186756765  | 0.350954108 | CCT2      | turquoise | -0.21975 | 0.280751 |
| HSPA6     | salmon  | 0.122212 | 0.55201  | MRP59     | royalblue | 0.190616458  | 0.340906477 | NUDT19    | turquoise | -0.21945 | 0.281416 |
| TMBIM4    | salmon  | -0.12073 | 0.556868 | ANKRD10   | royalblue | 0.199927355  | 0.317389252 | NDUFA5    | turquoise | -0.21904 | 0.282332 |
| TMCO6     | salmon  | -0.11927 | 0.56168  | DDX28     | royalblue | 0.201725471  | 0.312965596 | SF3A3     | turquoise | -0.21874 | 0.283019 |
| HIST1H2BK | salmon  | -0.11914 | 0.562113 | CYC1      | royalblue | 0.205804555  | 0.303072447 | RAP1A     | turquoise | -0.21863 | 0.28327  |
| MARCKS    | salmon  | -0.11237 | 0.584693 | H3F3B     | royalblue | 0.210506962  | 0.291912581 | CAMTA1    | turquoise | -0.2185  | 0.283551 |
| ILIRN     | salmon  | 0.110929 | 0.589556 | NTAN1     | royalblue | 0.211945278  | 0.288551596 | TMEM126E  | turquoise | -0.21696 | 0.287043 |
| CLN8      | salmon  | 0.110046 | 0.59254  | FDX1L     | royalblue | 0.224940866  | 0.259298257 | ARAF      | turquoise | -0.21651 | 0.28807  |
| IMPA1     | salmon  | 0.106776 | 0.603646 | RING1     | royalblue | 0.249983527  | 0.208547526 | RHOF      | turquoise | -0.2164  | 0.288324 |
| PDIA5     | salmon  | -0.10395 | 0.613325 | CMC2      | royalblue | 0.256558105  | 0.196432141 | PLAC8     | turquoise | -0.21587 | 0.289534 |
| RAPGEF1   | salmon  | 0.101607 | 0.621379 | NUDC      | royalblue | 0.259140773  | 0.191808052 | POP4      | turquoise | -0.21557 | 0.290224 |
| SLC7A11   | salmon  | 0.099943 | 0.627134 | IRF2BP1   | royalblue | 0.267072863  | 0.1780776   | IL13RA1   | turquoise | -0.2144  | 0.292921 |
| RAB35     | salmon  | 0.09352  | 0.649536 | PFN1      | royalblue | 0.273010049  | 0.168260249 | ACAT2     | turquoise | -0.21416 | 0.293456 |
| BRD1      | salmon  | 0.092503 | 0.653111 | CHCHD2    | royalblue | 0.274093714  | 0.16651037  | ANAPC10   | turquoise | -0.21403 | 0.293767 |
| DHDDS     | salmon  | 0.085671 | 0.677322 | CCDC12    | royalblue | 0.277368163  | 0.161300958 | TCEANC2   | turquoise | -0.21398 | 0.293873 |
| EAF1      | salmon  | 0.08277  | 0.687698 | MYEOV2    | royalblue | 0.282584964  | 0.153241762 | ATAD2B    | turquoise | -0.21391 | 0.29404  |
| CKX13     | salmon  | -0.08104 | 0.693923 | TRMT2A    | royalblue | 0.289684842  | 0.142741024 | TGFA      | turquoise | -0.21367 | 0.294608 |
| ZNF546    | salmon  | 0.079938 | 0.697884 | SCARNA7   | royalblue | 0.290041424  | 0.142227674 | PIPS1C1   | turquoise | -0.2134  | 0.295225 |
| TMEM19    | salmon  | -0.07846 | 0.703234 | SPATASL1  | royalblue | 0.321315898  | 0.102201563 | C5orf42   | turquoise | -0.21314 | 0.295828 |
| CSF1      | salmon  | 0.076322 | 0.710959 | RRS1      | royalblue | 0.323714057  | 0.099522969 | BCKDHA    | turquoise | -0.21298 | 0.296188 |
| OSGIN1    | salmon  | 0.075605 | 0.71356  | POLR2F    | royalblue | 0.325831434  | 0.097201997 | IKBIP     | turquoise | -0.21234 | 0.297677 |
| AKR1C2    | salmon  | 0.072859 | 0.723556 | C6orf1    | royalblue | 0.340456798  | 0.08226402  | ZNF451    | turquoise | -0.21227 | 0.297837 |
| SURF4     | salmon  | -0.07216 | 0.726112 | RPL18     | royalblue | 0.343344382  | 0.079533495 | CENPC1    | turquoise | -0.21223 | 0.297944 |
| SOWAHC    | salmon  | 0.069728 | 0.735009 | FAU       | royalblue | 0.344132295  | 0.078800582 | KIAA1551  | turquoise | -0.212   | 0.298471 |
| IL6R      | salmon  | -0.06632 | 0.747548 | NDUF89    | royalblue | 0.346378905  | 0.076739093 | BTF3L4    | turquoise | -0.21187 | 0.298773 |
| UBE2Z     | salmon  | 0.062737 | 0.760773 | SEPHS1    | royalblue | 0.350442704  | 0.07311524  | C18orf21  | turquoise | -0.21156 | 0.299498 |
| APBA3     | salmon  | -0.06176 | 0.764379 | EXOSC1    | royalblue | 0.352591437  | 0.071252999 | HUS1      | turquoise | -0.21059 | 0.301782 |
| SRSF7     | salmon  | -0.05887 | 0.775123 | EMC9      | royalblue | 0.353456794  | 0.070513408 | NOC2L     | turquoise | -0.21053 | 0.301919 |
| PDGFC     | salmon  | -0.05611 | 0.785443 | AIMP1     | royalblue | 0.358095407  | 0.066649181 | VAMP3     | turquoise | -0.21052 | 0.301937 |
| LOC730101 | salmon  | -0.05466 | 0.790837 | PRDX5     | royalblue | 0.380373818  | 0.050319361 | MPHOSPH8  | turquoise | -0.21003 | 0.303091 |
| YRDC      | salmon  | -0.05163 | 0.802198 | TCEB2     | royalblue | 0.386002703  | 0.046739047 | GRHRP     | turquoise | -0.20958 | 0.304144 |
| SLC39A14  | salmon  | -0.05053 | 0.806335 | ZNF688    | royalblue | 0.397232904  | 0.040198124 | CDK7      | turquoise | -0.20935 | 0.30469  |
| CD274     | salmon  | 0.047415 | 0.818085 | COX5B     | royalblue | 0.405723748  | 0.035753963 | CRIP1     | turquoise | -0.20909 | 0.305302 |
| PDRG1     | salmon  | -0.0466  | 0.821154 | PET100    | royalblue | 0.416759662  | 0.030574695 | HNRPL1    | turquoise | -0.20894 | 0.305658 |
| PRMT3     | salmon  | 0.042152 | 0.837999 | EIF3K     | royalblue | 0.45557129   | 0.016939591 | EV12B     | turquoise | -0.20886 | 0.305854 |
| GCLM      | salmon  | -0.04064 | 0.843742 | RNF113A   | royalblue | 0.470544082  | 0.013248904 | LOC728554 | turquoise | -0.20852 | 0.306657 |
| SNORA33   | salmon  | 0.038015 | 0.853722 | PSMA7     | royalblue | 0.490198247  | 0.009439445 | ELP4      | turquoise | -0.20833 | 0.307112 |
| PIM3      | salmon  | -0.03547 | 0.863411 | RPU5D2    | royalblue | 0.504747615  | 0.007251353 | SP140L    | turquoise | -0.20812 | 0.307611 |
| LOC643837 | salmon  | -0.03398 | 0.869121 | PRDX6     | royalblue | 0.529243152  | 0.004530667 | UBE2L6    | turquoise | -0.20792 | 0.308091 |
| SHMT2     | salmon  | 0.033119 | 0.8724   | INTS8     | salmon    | -0.508397121 | 0.006775138 | LRRCC40   | turquoise | -0.20782 | 0.308316 |
| ARGAP3    | salmon  | -0.03142 | 0.878895 | GDAP2     | salmon    | -0.460395974 | 0.015667871 | NSFP1     | turquoise | -0.20756 | 0.308955 |
| YKT6      | salmon  | -0.02814 | 0.891455 | APPL1     | salmon    | -0.428563017 | 0.02572242  | HLA-DMA   | turquoise | -0.20744 | 0.309239 |
| KLHL15    | salmon  | -0.02808 | 0.891691 | ANGEL2    | salmon    | -0.419055052 | 0.02957747  | IFNAR1    | turquoise | -0.20742 | 0.309283 |
| LCA1      | salmon  | 0.027847 | 0.892585 | TXNDC12   | salmon    | -0.414655809 | 0.031512331 | MAP3K7    | turquoise | -0.2073  | 0.309577 |
| TPM1L2    | salmon  | -0.02777 | 0.892895 | MRP535    | salmon    | -0.401796735 | 0.037757807 | MRPS17    | turquoise | -0.20704 | 0.310194 |
| TUBB8     | salmon  | -0.02703 | 0.895704 | PTAR1     | salmon    | -0.39031586  | 0.044134203 | FAM193A   | turquoise | -0.20697 | 0.310353 |
| CBLL1     | salmon  | -0.02337 | 0.909794 | DHDH2     | salmon    | -0.382092953 | 0.049203752 | NSL1      | turquoise | -0.20688 | 0.31057  |
| PELI1     | salmon  | 0.022188 | 0.914325 | PIK3CA    | salmon    | -0.379866962 | 0.050652046 | DTNBP1    | turquoise | -0.2059  | 0.312928 |
| FBXL15    | salmon  | -0.02194 | 0.915275 | BTF2M     | salmon    | -0.373970695 | 0.054650539 | ECH1      | turquoise | -0.20525 | 0.314489 |
| BTG1      | salmon  | 0.021321 | 0.91766  | LEO1      | salmon    | -0.36569276  | 0.060676001 | SMC4      | turquoise | -0.20493 | 0.315249 |
| TNFRSF18  | salmon  | 0.020522 | 0.920738 | UBA6      | salmon    | -0.365198382 | 0.061051557 | AKR1B1    | turquoise | -0.20444 | 0.316429 |
| PLEK      | salmon  | 0.018726 | 0.927656 | PPP3C2    | salmon    | -0.363876893 | 0.062064303 | TM9SF1    | turquoise | -0.20328 | 0.319256 |
| HIST1H4H  | salmon  | 0.017795 | 0.931244 | NSDHL     | salmon    | -0.360564776 | 0.06465992  | UBR7      | turquoise | -0.20269 | 0.320697 |
| BCL6      | salmon  | -0.0166  | 0.935854 | GRB2      | salmon    | -0.358799137 | 0.066077519 | HMG2B     | turquoise | -0.2026  | 0.320917 |
| TULP3     | salmon  | -0.01624 | 0.937258 | REEP3     | salmon    | -0.357661126 | 0.067003863 | DICER1    | turquoise | -0.20191 | 0.32259  |
| ZCCHC14   | salmon  | -0.01473 | 0.943056 | BRGX      | salmon    | -0.356503003 | 0.067956842 | C8orf40   | turquoise | -0.20145 | 0.323707 |
| FDXACB1   | salmon  | -0.01329 | 0.948618 | PSMD10    | salmon    | -0.352853229 | 0.071028628 | RPF2      | turquoise | -0.20111 | 0.324563 |
| DGCR8     | salmon  | 0.00894  | 0.965428 | NPAT      | salmon    | -0.352406817 | 0.071411556 | C9orf47   | turquoise | -0.20094 | 0.32497  |
| POLR1E    | salmon  | -0.0073  | 0.971775 | FAR1      | salmon    | -0.351138611 | 0.072508074 | TRIM27    | turquoise | -0.19917 | 0.329331 |
| NC1002870 | salmon  | 0.004006 | 0.984505 | DOCK10    | salmon    | -0.346998808 | 0.076177596 | AIM2      | turquoise | -0.19914 | 0.329405 |
| NCOA5     | salmon  | -0.00333 | 0.987129 | C17orf61  | salmon    | -0.332745918 | 0.089904993 | FTSJ1     | turquoise | -0.19832 | 0.33146  |
| TXNDC5    | salmon  | -0.00249 | 0.990385 | UTP14A    | salmon    | -0.330872284 | 0.091840054 | EIF3I     | turquoise | -0.1979  | 0.332506 |
| MOGS      | salmon  | -0.00071 | 0.997256 | CRBN      | salmon    | -0.33080522  | 0.091909894 | DTX4      | turquoise | -0.19745 | 0.333611 |
| IERSL     | salmon  | 0.000391 | 0.998488 | IFT46     | salmon    | -0.329134051 | 0.093663198 | ZNF473    | turquoise | -0.19703 | 0.334672 |
| CRAT      | skyblue | -0.43688 | 0.025643 | NAT1      | salmon    | -0.32219005  | 0.101219015 | DCAF17    | turquoise | -0.1966  | 0.335749 |
| ERGIC1    | skyblue | -0.39763 | 0.044258 | TNKS      | salmon    | -0.321237229 | 0.102290313 | TTL1      | turquoise | -0.19583 | 0.33769  |
| CHMP7     | skyblue | -0.37937 | 0.055952 | FRS2      | salmon    | -0.315594506 | 0.108808908 | ZNF7      | turquoise | -0.19582 | 0.337699 |
| CYBASC3   | skyblue | -0.34051 | 0.088721 | PBRM1     | salmon    | -0.312418379 | 0.11261101  | SUGT1     | turquoise | -0.19556 | 0.338372 |
| ETFA      | skyblue | -0.26988 | 0.182426 | TAX1BP1   | salmon    | -0.302898186 | 0.12459589  | APPL2     | turquoise | -0.19544 | 0.338666 |
| TP53I13   | skyblue | -0.23717 | 0.243381 | PTP4A2    | salmon    | -0.300593984 | 0.12763186  | PRR11     | turquoise | -0.19511 | 0.339492 |
| RCAN1     | skyblue | -0.23016 | 0.258002 | CCNT1     | salmon    | -0.295613749 | 0.13437755  | LOC728377 | turquoise | -0.1949  | 0.340027 |
| ARMCX3    | skyblue | -0.19993 | 0.327453 | PRMT6     | salmon    | -0.292684502 | 0.138464007 | DNM2      | turquoise | -0.19438 | 0.341348 |
| IFITM2    | skyblue | -0.19581 | 0.337723 | ATP10D    | salmon    | -0.283482676 | 0.151884454 | ORC2      | turquoise | -0.19408 | 0.342112 |
| ARGHEFS   | skyblue | -0.17801 | 0.384291 | RABEPK    | salmon    | -0.276899559 | 0.162039302 | ZNF207    | turquoise | -0.19403 | 0.342226 |
| CREB3L2   | skyblue | -0.17748 | 0.385739 | BTBD1     | salmon    | -0.273425341 | 0.16758812  | PIK3R1    | turquoise | -0.19346 | 0.343665 |
| ZNF138    | skyblue | 0.173479 | 0.396705 | RAP2C     | salmon    | -0.269336117 | 0.174289149 | TMEM237   | turquoise | -0.19333 | 0.344008 |
| RELA      | skyblue | -0.17256 | 0.399248 | DDX21     | salmon    | -0.268955983 | 0.174921472 | UBE2W     | turquoise | -0.19304 | 0.34475  |
| GNAI1     | skyblue | -0.16673 | 0.415602 | SP4       | salmon    | -0.267819616 | 0.176821311 | PSMA4     | turquoise | -0.19296 | 0.344942 |
| FAM103A1  | skyblue | -0.15666 | 0.444723 | ZNF383    | salmon    | -0.267272612 | 0.177740947 | NUDT16P1  | turquoise | -0.19251 | 0.346097 |
| QSOX2     | skyblue | -0.14716 | 0.473139 | CDK17     | salmon    | -0.264344851 | 0.182719982 | NAE1      | turquoise | -0.19225 | 0.346772 |
| DOM3Z     | skyblue | -0.13597 | 0.507769 | MMGT1     | salmon    | -0.264207838 | 0.182955342 | CCNC      | turquoise | -0.19216 | 0.346981 |
| NOC2L     | skyblue | -0.13592 | 0.507933 | YARS2     | salmon    | -0.235865053 | 0.236255183 | ICA1      | turquoise | -0.1914  | 0.34894  |
| ACO2      | skyblue | -0.13506 | 0.510652 | DES12     | salmon    | -0.223191044 | 0.263120364 | RBM48     | turquoise | -0.19065 | 0.350863 |
| C6orf170  | skyblue | -0.135   | 0.510853 | NHLRC2    | salmon    | -0.221686959 | 0.266434727 | SIGLEC10  | turquoise | -0.19028 | 0.351816 |
| MYO9A     | skyblue | 0.124531 | 0.544433 | C14orf119 | salmon    | -0.219107652 | 0.272180905 | KRNL4     | turquoise | -0.19016 | 0.352123 |
| RFWO2     | skyblue | -0.11601 | 0.572515 | MTPN      | salmon    | -0.214527212 | 0.282579935 | KDEL2     | turquoise | -0.19015 | 0.3      |

Table 6. Gene module membership and correlation with growth rate (48/72h), with adjusted p values for each module

|            |         |          |          |                 |        |              |             |          |           |          |          |
|------------|---------|----------|----------|-----------------|--------|--------------|-------------|----------|-----------|----------|----------|
| RBM14      | skyblue | -0.03363 | 0.870458 | HEATR2          | salmon | -0.168784074 | 0.40001729  | UCP2     | turquoise | -0.18849 | 0.35644  |
| DDX42      | skyblue | -0.03302 | 0.872779 | KATNB1          | salmon | -0.167143766 | 0.404679226 | RAB27A   | turquoise | -0.18812 | 0.3574   |
| SLC38A7    | skyblue | -0.02978 | 0.885169 | TMEM192         | salmon | -0.162214985 | 0.418869435 | SPDL1    | turquoise | -0.18761 | 0.358742 |
| UBA3       | skyblue | -0.02109 | 0.918539 | RBM5            | salmon | -0.158274977 | 0.430407659 | MRPL27   | turquoise | -0.18744 | 0.359189 |
| SLC9A3R1   | skyblue | -0.02055 | 0.920642 | GIN1            | salmon | -0.155699849 | 0.438041387 | RHOQ     | turquoise | -0.18688 | 0.360659 |
| PCED1B-AS5 | skyblue | -0.01345 | 0.948013 | UBR1            | salmon | -0.155639843 | 0.438220135 | PTPN22   | turquoise | -0.18678 | 0.360905 |
| SOGA1      | skyblue | -0.00898 | 0.965254 | SLC25A24        | salmon | -0.152238251 | 0.448417081 | HEXB     | turquoise | -0.18666 | 0.361233 |
| NOM1       | tan     | -0.48239 | 0.012568 | TJAP1           | salmon | -0.151578573 | 0.450409124 | NDUFB1   | turquoise | -0.18586 | 0.363332 |
| SNX18      | tan     | -0.44525 | 0.022643 | ARFGAP1         | salmon | -0.148782298 | 0.458905084 | ADNP     | turquoise | -0.1858  | 0.363479 |
| TAF10      | tan     | -0.42585 | 0.030075 | SS18            | salmon | -0.148557495 | 0.459591745 | NKIRAS1  | turquoise | -0.18579 | 0.363513 |
| ZNFS10     | tan     | -0.39839 | 0.043818 | TRAPP1          | salmon | -0.136087804 | 0.498512654 | PGP      | turquoise | -0.18515 | 0.365188 |
| ZDBF2      | tan     | 0.386856 | 0.050896 | OSGIN2          | salmon | -0.129944992 | 0.518271747 | CNOT10   | turquoise | -0.18501 | 0.365552 |
| ZNF408     | tan     | 0.382999 | 0.053453 | GRPEL2          | salmon | -0.128150234 | 0.524115607 | BCL10    | turquoise | -0.18482 | 0.366062 |
| HELB       | tan     | -0.37124 | 0.061868 | HS1BP3          | salmon | -0.126024798 | 0.531076917 | XP01     | turquoise | -0.18476 | 0.366231 |
| CASP2      | tan     | -0.36262 | 0.068668 | MAN2A1          | salmon | -0.123913849 | 0.53803405  | GFM2     | turquoise | -0.18467 | 0.366446 |
| CKNQP1     | tan     | -0.35877 | 0.071881 | ERC6G1          | salmon | -0.123504061 | 0.539389561 | TLR5     | turquoise | -0.18447 | 0.366994 |
| PAGR1      | tan     | -0.35509 | 0.075065 | DDX5            | salmon | -0.123476173 | 0.53948187  | NMI      | turquoise | -0.18442 | 0.367107 |
| ZCVWPW1    | tan     | 0.351283 | 0.078462 | HMGN2           | salmon | -0.114478198 | 0.569645639 | CEP41    | turquoise | -0.18433 | 0.367344 |
| FBXO32     | tan     | -0.3351  | 0.094246 | ANKRD36B        | salmon | -0.109195493 | 0.587698868 | PDE6D    | turquoise | -0.18425 | 0.367564 |
| C11orf31   | tan     | -0.33151 | 0.098048 | ORMDL3          | salmon | -0.099931308 | 0.619942273 | YTHDF3   | turquoise | -0.18346 | 0.369656 |
| MISANTD4   | tan     | -0.3309  | 0.098702 | SAMHD1          | salmon | -0.099001537 | 0.623217834 | C4orf27  | turquoise | -0.18321 | 0.37032  |
| TMEM230    | tan     | -0.3287  | 0.101103 | LYN             | salmon | -0.094494751 | 0.639193528 | USMG5    | turquoise | -0.1829  | 0.371162 |
| ORA2A20P   | tan     | -0.32281 | 0.10774  | SLC25A17        | salmon | -0.093491887 | 0.64277029  | CXorf38  | turquoise | -0.18241 | 0.372444 |
| CG8BP1     | tan     | -0.32249 | 0.108106 | TX2P1-UPK3BP1-F | salmon | -0.092434552 | 0.646549754 | CGRFR1   | turquoise | -0.182   | 0.373542 |
| COG8       | tan     | -0.32125 | 0.10954  | ARL16           | salmon | -0.090448031 | 0.653673754 | CDC73    | turquoise | -0.18191 | 0.373802 |
| SYTL1      | tan     | -0.31947 | 0.111639 | DCUN1D1         | salmon | -0.085896827 | 0.670106396 | FASTKD3  | turquoise | -0.18126 | 0.375524 |
| CLINT1     | tan     | -0.31922 | 0.111935 | CUEDC2          | salmon | -0.08569171  | 0.670850567 | ITGB1    | turquoise | -0.18018 | 0.378433 |
| SIRT7      | tan     | -0.3167  | 0.114954 | SENP2           | salmon | -0.078627112 | 0.696661906 | LSM1     | turquoise | -0.18006 | 0.378758 |
| PEX11B     | tan     | -0.3085  | 0.12519  | SIRT1           | salmon | -0.078595711 | 0.696777396 | C11orf73 | turquoise | -0.17788 | 0.384636 |
| ZNF26      | tan     | 0.307169 | 0.126909 | ARM7C           | salmon | -0.076389214 | 0.704909216 | RAB14    | turquoise | -0.1778  | 0.384849 |
| SEC23A     | tan     | 0.302823 | 0.132653 | NPC2            | salmon | -0.074061983 | 0.713520402 | MOB3A    | turquoise | -0.17725 | 0.386361 |
| ZNF280D    | tan     | -0.3026  | 0.132951 | CREB1           | salmon | -0.065550714 | 0.745299283 | RBM14    | turquoise | -0.17658 | 0.388175 |
| Z2HC1A     | tan     | -0.29547 | 0.142801 | BMPR2           | salmon | -0.058849505 | 0.770612317 | ASMTL    | turquoise | -0.17641 | 0.388654 |
| AGPAT3     | tan     | -0.29322 | 0.146007 | HEATR1          | salmon | -0.052134289 | 0.796210402 | CFDP1    | turquoise | -0.1763  | 0.388952 |
| FGGY       | tan     | 0.292017 | 0.147745 | KCTD13          | salmon | -0.041717557 | 0.836319843 | TSSC1    | turquoise | -0.17623 | 0.389145 |
| TMEM109    | tan     | -0.29091 | 0.149355 | KLHDC3          | salmon | -0.025492364 | 0.899562158 | B3GALT6  | turquoise | -0.17547 | 0.391226 |
| USF2       | tan     | -0.28694 | 0.15524  | CLP1            | salmon | -0.024305934 | 0.904214937 | TPT1     | turquoise | -0.17521 | 0.391941 |
| RHOA       | tan     | -0.28255 | 0.161971 | STK24           | salmon | -0.018026096 | 0.928890242 | ITGB3BP  | turquoise | -0.17508 | 0.392287 |
| AFG3L1P    | tan     | 0.279337 | 0.166976 | NSMAF           | salmon | -0.012019102 | 0.952553973 | LACTB    | turquoise | -0.17491 | 0.392751 |
| GTJ21      | tan     | -0.27707 | 0.170597 | BCLA1F          | salmon | -0.002335146 | 0.99077698  | TRAF3IP1 | turquoise | -0.17473 | 0.393251 |
| PPCS       | tan     | -0.27611 | 0.172138 | C8orf59         | salmon | 0.002350246  | 0.99071734  | SBF1     | turquoise | -0.17451 | 0.393863 |
| FGD3       | tan     | -0.27229 | 0.178391 | DOHH            | salmon | 0.005134244  | 0.979723132 | RLP6     | turquoise | -0.17408 | 0.395055 |
| TBL2       | tan     | -0.27127 | 0.180088 | CLCC1           | salmon | 0.005508993  | 0.978243453 | INTU     | turquoise | -0.17407 | 0.39507  |
| FUZ        | tan     | -0.27102 | 0.180502 | ABCA11P         | salmon | 0.007177906  | 0.971654752 | ZNF83    | turquoise | -0.1735  | 0.396634 |
| TCF12      | tan     | -0.26728 | 0.18683  | MED6            | salmon | 0.014829139  | 0.941478127 | CAPZ2A   | turquoise | -0.17324 | 0.397363 |
| PARP1      | tan     | -0.26266 | 0.19485  | MGC7208D        | salmon | 0.016044348  | 0.936691512 | ZNHIT6   | turquoise | -0.17293 | 0.398234 |
| SLC25A40   | tan     | -0.26    | 0.199592 | SPATC1          | salmon | 0.018542119  | 0.926859906 | SRSF10   | turquoise | -0.17288 | 0.39837  |
| TBRG4      | tan     | -0.25923 | 0.200961 | ANKRD13D        | salmon | 0.02536414   | 0.900135427 | MRPL47   | turquoise | -0.17222 | 0.400202 |
| UNC93B1    | tan     | -0.25828 | 0.202687 | SULT1A4         | salmon | 0.026612465  | 0.895172466 | ZNF746   | turquoise | -0.17213 | 0.400456 |
| STAR3D     | tan     | -0.25623 | 0.206414 | DUSP22          | salmon | 0.027964083  | 0.889879477 | GMPS     | turquoise | -0.17208 | 0.40058  |
| PRR12      | tan     | -0.25532 | 0.208085 | SNAPC2          | salmon | 0.028285883  | 0.888619966 | PMS1     | turquoise | -0.17185 | 0.401218 |
| CALHM2     | tan     | -0.2547  | 0.209226 | ZNF345          | salmon | 0.029567116  | 0.883607923 | WIBG     | turquoise | -0.17117 | 0.403128 |
| PBX3       | tan     | -0.25095 | 0.216246 | SLC17A5         | salmon | 0.030024686  | 0.881819008 | TMEM109  | turquoise | -0.17109 | 0.403331 |
| FBL        | tan     | -0.24967 | 0.21868  | RBM39           | salmon | 0.031134436  | 0.877482696 | DMXL1    | turquoise | -0.17093 | 0.403783 |
| RBBP7      | tan     | -0.24496 | 0.22777  | CAMKK2          | salmon | 0.031341156  | 0.87667532  | UBTD2    | turquoise | -0.17077 | 0.404244 |
| TAF8       | tan     | -0.244   | 0.22967  | CIRH1A          | salmon | 0.03551509   | 0.860400256 | VPS35    | turquoise | -0.17044 | 0.405152 |
| RNF141     | tan     | -0.24189 | 0.233851 | PAG1            | salmon | 0.043211905  | 0.830538819 | RBM34    | turquoise | -0.17043 | 0.405181 |
| C12orf57   | tan     | 0.241601 | 0.234418 | ANKRD11         | salmon | 0.04646414   | 0.81798734  | DND1     | turquoise | -0.16927 | 0.408438 |
| USB1       | tan     | -0.24045 | 0.236715 | PACSN2          | salmon | 0.051903827  | 0.797092738 | PROSC    | turquoise | -0.16882 | 0.4097   |
| MAGED2     | tan     | -0.22935 | 0.259732 | FOXRED1         | salmon | 0.053849609  | 0.789650949 | API5     | turquoise | -0.16868 | 0.410086 |
| ATG16L2    | tan     | -0.22616 | 0.266591 | RFC3            | salmon | 0.063876178  | 0.751601627 | POLG     | turquoise | -0.16861 | 0.410304 |
| HDH0H      | tan     | 0.225892 | 0.267172 | HERC2           | salmon | 0.06388409   | 0.751571815 | SEHL1    | turquoise | -0.16852 | 0.410543 |
| IFI140     | tan     | -0.22455 | 0.270103 | YPEL3           | salmon | 0.091946649  | 0.648296673 | LSAMP    | turquoise | -0.16846 | 0.410707 |
| NFKBID     | tan     | 0.222536 | 0.274532 | LSP1            | salmon | 0.110599491  | 0.582876645 | CNOT2    | turquoise | -0.16811 | 0.411696 |
| CCDC47     | tan     | 0.218647 | 0.283223 | LRRCL14         | salmon | 0.121684774  | 0.545426771 | GPR160   | turquoise | -0.16774 | 0.412738 |
| TMEM41A    | tan     | 0.21821  | 0.284211 | HNRNPU          | salmon | 0.124932234  | 0.534672369 | SMURF2   | turquoise | -0.16763 | 0.413058 |
| PIPK51C    | tan     | -0.21434 | 0.29304  | C15orf40        | salmon | 0.134606923  | 0.50324142  | PPA2     | turquoise | -0.16739 | 0.41373  |
| FASTKD2    | tan     | 0.212876 | 0.296438 | TULP4           | salmon | 0.135054449  | 0.501810034 | PUS7L    | turquoise | -0.16694 | 0.415001 |
| CMAHP      | tan     | -0.21111 | 0.300546 | IPO13           | salmon | 0.139891635  | 0.486468679 | SGK223   | turquoise | -0.16636 | 0.416654 |
| BTBD19     | tan     | 0.210539 | 0.301898 | GLYCTK          | salmon | 0.148887385  | 0.458584281 | OClAD1   | turquoise | -0.16636 | 0.416656 |
| NUTF2      | tan     | -0.21021 | 0.302679 | RAD21           | salmon | 0.150282875  | 0.45433542  | CLNS1A   | turquoise | -0.16621 | 0.417084 |
| ORA2A9P    | tan     | -0.20821 | 0.307402 | DDX3X           | salmon | 0.154272267  | 0.44230459  | ACTR3    | turquoise | -0.16617 | 0.417191 |
| AGA        | tan     | -0.20594 | 0.312826 | GTPBP3          | salmon | 0.162686229  | 0.417500947 | FXR1     | turquoise | -0.1658  | 0.418248 |
| UBE2G1     | tan     | -0.20499 | 0.315105 | CACNB3          | salmon | 0.173665     | 0.386325734 | SNX9     | turquoise | -0.16569 | 0.418564 |
| Z3H15      | tan     | -0.20478 | 0.315614 | CTDNEP1         | salmon | 0.181665623  | 0.364473588 | CCDC71L  | turquoise | -0.16528 | 0.419738 |
| MAST3      | tan     | -0.20119 | 0.324367 | LOC1005067      | salmon | 0.192598448  | 0.335814835 | HAGH     | turquoise | -0.16511 | 0.42021  |
| MEAF6      | tan     | -0.19987 | 0.327618 | PQCTL           | salmon | 0.200871605  | 0.315061469 | ZC3H6    | turquoise | -0.16422 | 0.422769 |
| GPATCH2    | tan     | -0.19953 | 0.328446 | BRMS1           | salmon | 0.201070171  | 0.314573306 | PRPF40A  | turquoise | -0.16405 | 0.423238 |
| APOO       | tan     | 0.194968 | 0.339853 | NOSIP           | salmon | 0.202487366  | 0.311102761 | RP9      | turquoise | -0.16344 | 0.424984 |
| VOPP1      | tan     | -0.19357 | 0.343389 | RSAD1           | salmon | 0.212026523  | 0.28836248  | IRGQ     | turquoise | -0.16342 | 0.425061 |
| USP32P1    | tan     | 0.190755 | 0.350595 | B4GALT3         | salmon | 0.224023782  | 0.261296904 | PFND4    | turquoise | -0.16326 | 0.425501 |
| E1F3F      | tan     | -0.18749 | 0.35906  | PMS2P1          | salmon | 0.228359246  | 0.251936154 | CCR5     | turquoise | -0.16323 | 0.425598 |
| PPARD      | tan     | -0.18402 | 0.368181 | MAP2K7          | salmon | 0.238719326  | 0.230466031 | BLOC1S2  | turquoise | -0.1632  | 0.425685 |
| BTBD6      | tan     | -0.18185 | 0.373946 | BLOC1S3         | salmon | 0.296522521  | 0.133127734 | IQCQ     | turquoise | -0.16277 | 0.426934 |
| BABAM1     | tan     | -0.18095 | 0.376362 | ABCD1           | salmon | 0.312450489  | 0.112572086 | METAP2   | turquoise | -0.1623  | 0.428279 |
| LPCAT4     | tan     | -0.18074 | 0.376932 | LILRA2          | salmon | 0.3160053    | 0.108324197 | KIAA1586 | turquoise | -0.1623  | 0.42828  |
| TRIM14     | tan     | -0.18054 | 0.377456 | CORO1B          | salmon | 0.32559633   | 0.097457685 | ADAP1    | turquoise | -0.16229 | 0.428312 |
| TUBGCP4    | tan     | 0.177586 | 0.385444 | C2CD2L          | salmon | 0.34464093   | 0.078330198 | ARV1     | turquoise | -0.16224 | 0.428446 |
| PTER       | tan     | 0.174464 | 0.393986 | ABHD16A         | salmon | 0.347828286  | 0.075431196 | RNF168   | turquoise | -0.1621  | 0.428863 |
| SBDS       | tan     | 0.167562 | 0.41325  | NDUF55          | salmon | 0.374238574  | 0.054463684 | NFX1     | turquoise | -0.16208 | 0.428924 |
| PTGS2      | tan     | 0.166783 | 0.415455 | SERBP1          | tan    | -0.543333275 | 0.003401809 | KRR1     | turquoise | -0.16198 | 0.429189 |
| UBAP2      | tan     | -0.16634 | 0.416708 | BRCC3           | tan    | -0.522934691 | 0.005130921 | SIRPA    | turquoise | -0.16193 | 0.429344 |
| RAB2A2     | tan     | 0.163799 | 0.423966 | HIST1H1E        | tan    | -0.516931607 | 0.005763381 | ME1      | turquoise | -0.1619  | 0.42944  |
| ZNF253     | tan     | -0.16266 | 0.42724  |                 |        |              |             |          |           |          |          |

Table 6. Gene module membership and correlation with growth rate (48/72h), with adjusted p values for each module

|           |           |          |          |          |     |              |              |           |           |          |          |
|-----------|-----------|----------|----------|----------|-----|--------------|--------------|-----------|-----------|----------|----------|
| PPP6C     | tan       | -0.15275 | 0.456301 | PRRG4    | tan | -0.430835498 | 0.024864221  | RSRC1     | turquoise | -0.16016 | 0.434487 |
| HIST1H4B  | tan       | -0.15133 | 0.460559 | PEA15    | tan | -0.422427314 | 0.028160151  | TTC3      | turquoise | -0.15955 | 0.436234 |
| RPL7      | tan       | -0.15045 | 0.463198 | ELF1     | tan | -0.416380026 | 0.030742207  | BBS5      | turquoise | -0.15954 | 0.436271 |
| SERPINH1  | tan       | 0.148883 | 0.46791  | ATP6V1G1 | tan | -0.407980798 | 0.034641339  | HOOK3     | turquoise | -0.15942 | 0.436628 |
| ZDHHC5    | tan       | -0.14773 | 0.471393 | PPM1A    | tan | -0.405682968 | 0.035774326  | NFKBIE    | turquoise | -0.15893 | 0.438055 |
| PIEZ01    | tan       | -0.14303 | 0.485772 | MRP63    | tan | -0.403870377 | 0.03668881   | EPG5      | turquoise | -0.15829 | 0.439921 |
| GABPA     | tan       | 0.138915 | 0.49854  | RABGEF1  | tan | -0.400931329 | 0.038211223  | USP3A     | turquoise | -0.15825 | 0.440031 |
| CD97      | tan       | -0.13872 | 0.499156 | MTL1     | tan | -0.397860925 | 0.039855061  | C7orf23   | turquoise | -0.15823 | 0.440096 |
| GBA2      | tan       | 0.136721 | 0.505414 | RHOA     | tan | -0.390230934 | 0.044184359  | OR2A7     | turquoise | -0.15782 | 0.441307 |
| NUDT4     | tan       | 0.133579 | 0.515336 | C11orf48 | tan | -0.389997723 | 0.044322319  | OGFR11    | turquoise | -0.1575  | 0.442231 |
| IKBKE     | tan       | -0.13258 | 0.518517 | PSMD7    | tan | -0.382408628 | 0.049001031  | SUSD3     | turquoise | -0.15745 | 0.442399 |
| CLEC16A   | tan       | 0.128445 | 0.531754 | SSU72    | tan | -0.375819649 | 0.053370991  | LRPPRC    | turquoise | -0.15711 | 0.443373 |
| BIRC2     | tan       | 0.122729 | 0.550318 | POLD3    | tan | -0.369970692 | 0.05750078   | AP3S1     | turquoise | -0.15683 | 0.444218 |
| TBCCD1    | tan       | -0.12123 | 0.555237 | AAR2     | tan | -0.351466071 | 0.072223714  | ATP5B     | turquoise | -0.15619 | 0.446087 |
| RPL11     | tan       | 0.117217 | 0.568497 | CHAF1A   | tan | -0.349235961 | 0.074177342  | PRR13     | turquoise | -0.15619 | 0.446097 |
| MAGOH     | tan       | -0.11698 | 0.569272 | ZNF649   | tan | -0.345472876 | 0.077565443  | B4GALT7   | turquoise | -0.15548 | 0.448204 |
| TS2C      | tan       | -0.11648 | 0.570963 | PHF5A    | tan | -0.331122489 | 0.091579845  | NAP1L1    | turquoise | -0.15527 | 0.448798 |
| ANKMY1    | tan       | -0.11495 | 0.576036 | PIPG     | tan | -0.328798727 | 0.094018014  | MBIP      | turquoise | -0.1546  | 0.450787 |
| TRAPPC9   | tan       | -0.11279 | 0.583295 | MALT1    | tan | -0.307770329 | 0.118351018  | COX7B     | turquoise | -0.15458 | 0.450854 |
| SEPN1     | tan       | -0.11137 | 0.588076 | SNORA49  | tan | -0.293799911 | 0.136897496  | TBCEL     | turquoise | -0.15441 | 0.451367 |
| SLFN11    | tan       | -0.11049 | 0.591048 | EMC1     | tan | -0.286183243 | 0.147853118  | CEBPD     | turquoise | -0.15422 | 0.451916 |
| CYP4V2    | tan       | -0.1094  | 0.594731 | MRGBP    | tan | -0.278678901 | 0.159248395  | AQR       | turquoise | -0.15342 | 0.454302 |
| RG519     | tan       | -0.10393 | 0.613366 | SNORA53  | tan | -0.274953565 | 0.165131066  | HARS2     | turquoise | -0.15262 | 0.456673 |
| ZBTB1     | tan       | -0.10215 | 0.619496 | FUNDC2   | tan | -0.27131684  | 0.171020273  | HSD17B14  | turquoise | -0.15254 | 0.45691  |
| TUBGCP6   | tan       | -0.10036 | 0.625686 | TFPT     | tan | -0.268350986 | 0.175931151  | LMBRD1    | turquoise | -0.15242 | 0.457269 |
| SLC25A25  | tan       | -0.09845 | 0.632322 | UBXN11   | tan | -0.262785664 | 0.185410973  | BCL2A1    | turquoise | -0.15224 | 0.457823 |
| MGAM      | tan       | 0.097431 | 0.635857 | PTGR1    | tan | -0.260711678 | 0.189032494  | NQO1      | turquoise | -0.15212 | 0.458186 |
| CPT1B     | tan       | 0.095353 | 0.643112 | PNN      | tan | -0.250110732 | 0.208308405  | GLE1      | turquoise | -0.15192 | 0.458773 |
| DDX17     | tan       | 0.093093 | 0.651039 | TMOD3    | tan | -0.239484582 | 0.228930139  | NLE1      | turquoise | -0.15183 | 0.459044 |
| MCF2L2    | tan       | 0.09283  | 0.651963 | FAF1     | tan | -0.23014251  | 0.242132825  | ARPC5L    | turquoise | -0.15176 | 0.459246 |
| TLR2      | tan       | 0.090571 | 0.659926 | EIF3J    | tan | -0.213529233 | 0.284878732  | CUL5      | turquoise | -0.15167 | 0.45954  |
| THAP10    | tan       | -0.09034 | 0.660759 | ATP6V0B  | tan | -0.187855413 | 0.348076324  | DNASE1    | turquoise | -0.15038 | 0.463387 |
| SUZ12     | tan       | -0.08898 | 0.665561 | SNHG8    | tan | -0.149271265 | 0.457413398  | TXLNG     | turquoise | -0.15015 | 0.464098 |
| SPATA13   | tan       | 0.087105 | 0.672212 | LRRC42   | tan | -0.123426934 | 0.539644866  | DNACJ8    | turquoise | -0.15004 | 0.46443  |
| EXOSC9    | tan       | 0.082294 | 0.689408 | RPL28    | tan | -0.102915109 | 0.609478375  | TNFSF13B  | turquoise | -0.14996 | 0.464666 |
| RAB11FIP1 | tan       | -0.07778 | 0.705676 | RPL12    | tan | -0.095276386 | 0.636411239  | XBP1      | turquoise | -0.14939 | 0.466379 |
| TRIOBP    | tan       | -0.07772 | 0.705887 | SLC39A4  | tan | -0.055174321 | 0.784594729  | STRAP     | turquoise | -0.14905 | 0.467399 |
| TUBGCP2   | tan       | -0.07687 | 0.708976 | B4GALT1  | tan | -0.010734632 | 0.957619738  | KRCC1     | turquoise | -0.14869 | 0.468491 |
| GRP34     | tan       | -0.06931 | 0.736532 | LRCH4    | tan | 0.018028401  | 0.928881168  | PCIF1     | turquoise | -0.14845 | 0.469216 |
| PLEKH48   | tan       | 0.068802 | 0.738407 | RASGRP1  | tan | 0.027953284  | 0.889921751  | IL10RB    | turquoise | -0.14833 | 0.469584 |
| TRMT10B   | tan       | -0.06522 | 0.751577 | UBE3B    | tan | 0.046236269  | 0.818865386  | CTU2      | turquoise | -0.14829 | 0.469692 |
| RP56      | tan       | 0.063988 | 0.756144 | HVCN1    | tan | 0.058298762  | 0.772703308  | EMC2      | turquoise | -0.14817 | 0.470081 |
| NUP54     | tan       | 0.063168 | 0.759177 | RP528    | tan | 0.069900344  | 0.729004344  | RPL34     | turquoise | -0.14778 | 0.471261 |
| TCOF1     | tan       | -0.0623  | 0.762379 | MSN      | tan | 0.080546238  | 0.689616028  | SRGIN1    | turquoise | -0.14706 | 0.473426 |
| NEK11     | tan       | -0.06002 | 0.770857 | NUP188   | tan | 0.089173263  | 0.658260989  | RNF14     | turquoise | -0.14702 | 0.473564 |
| ZCCHC4    | tan       | -0.05731 | 0.780966 | RP529    | tan | 0.096344325  | 0.632617597  | TIPARP    | turquoise | -0.14694 | 0.473796 |
| RAB18     | tan       | -0.05568 | 0.78703  | MAF1     | tan | 0.106899092  | 0.595623258  | SNORA14B  | turquoise | -0.14681 | 0.474191 |
| PIA5I     | tan       | -0.05281 | 0.797769 | SCIMP    | tan | 0.1132524    | 0.573812507  | PAK1P1    | turquoise | -0.14666 | 0.474666 |
| ATP6V0C   | tan       | -0.0509  | 0.804942 | MCM8BP   | tan | 0.117234021  | 0.560327582  | PRDMA4    | turquoise | -0.14656 | 0.474952 |
| DYNLN3    | tan       | -0.05038 | 0.806907 | DDB1     | tan | 0.125290191  | 0.533493122  | DBX3      | turquoise | -0.14653 | 0.475066 |
| CMTM6     | tan       | -0.04935 | 0.810775 | DMXL2    | tan | 0.127668771  | 0.525688659  | FBXO5     | turquoise | -0.14591 | 0.476945 |
| FERM3T3   | tan       | -0.04687 | 0.820158 | DHODH    | tan | 0.13029938   | 0.517121583  | B3GALT3   | turquoise | -0.14569 | 0.477619 |
| AGL       | tan       | -0.04682 | 0.820315 | ZC3HAV1  | tan | 0.130692092  | 0.515848491  | BOLA3     | turquoise | -0.14519 | 0.479146 |
| DLAT      | tan       | -0.04431 | 0.829838 | IFITM10  | tan | 0.135315345  | 0.500976509  | RNF115    | turquoise | -0.14497 | 0.479823 |
| RPL4      | tan       | 0.041571 | 0.840203 | ZNF341   | tan | 0.135879989  | 0.499174911  | PSMA6     | turquoise | -0.14464 | 0.480813 |
| ADAM17    | tan       | -0.03576 | 0.862312 | RNF111   | tan | 0.143373172  | 0.475576074  | COMMD8    | turquoise | -0.14458 | 0.481017 |
| RNPC3     | tan       | 0.035063 | 0.864975 | LAPTM5   | tan | 0.155656965  | 0.438169129  | BTF3      | turquoise | -0.14438 | 0.481627 |
| TOMM34    | tan       | 0.034951 | 0.8654   | PLAZG6   | tan | 0.156839148  | 0.434655066  | ALG2      | turquoise | -0.14415 | 0.482329 |
| AP152     | tan       | -0.03301 | 0.87281  | LZTR1    | tan | 0.159087518  | 0.42801409   | DNACJ2    | turquoise | -0.14378 | 0.483472 |
| NUDT21    | tan       | -0.03171 | 0.877798 | FAM193B  | tan | 0.1599927    | 0.425356209  | DANCR     | turquoise | -0.14372 | 0.483639 |
| TCEA3     | tan       | -0.0304  | 0.882801 | POQC2    | tan | 0.162907571  | 0.416859028  | C6orf62   | turquoise | -0.14367 | 0.483812 |
| TAB2      | tan       | 0.026225 | 0.89881  | DOPEY1   | tan | 0.165844409  | 0.408393686  | B4GALT2   | turquoise | -0.14347 | 0.484416 |
| CCDC109B  | tan       | 0.023042 | 0.911038 | NECAP1   | tan | 0.167522072  | 0.403601343  | ARHGEP5   | turquoise | -0.14346 | 0.484442 |
| CCDC126   | tan       | 0.020265 | 0.921725 | NIPAL3   | tan | 0.168289896  | 0.401418598  | MUM1      | turquoise | -0.14289 | 0.486195 |
| ABCF2     | tan       | 0.019727 | 0.923797 | PIGU     | tan | 0.168576817  | 0.400604659  | GRIPAP1   | turquoise | -0.14289 | 0.486204 |
| RP56KB1   | tan       | 0.017992 | 0.930482 | DPY19L3  | tan | 0.17579111   | 0.380446792  | ZNF329    | turquoise | -0.14263 | 0.486999 |
| GAK       | tan       | 0.011817 | 0.954311 | CCDC144A | tan | 0.17630124   | 0.379043938  | C5orf51   | turquoise | -0.14258 | 0.487175 |
| RAET1K    | tan       | -0.01112 | 0.956996 | LST1     | tan | 0.178134853  | 0.374026237  | FAM92A1   | turquoise | -0.14248 | 0.487475 |
| ACP1      | tan       | 0.007763 | 0.969976 | GGCX     | tan | 0.179445699  | 0.370462858  | GABARAPL1 | turquoise | -0.14197 | 0.489058 |
| NOD1      | tan       | 0.004144 | 0.983971 | ELL      | tan | 0.181973094  | 0.363648547  | TRPM7     | turquoise | -0.14192 | 0.489199 |
| KIAA1429  | tan       | 0.003345 | 0.987061 | C2orf47  | tan | 0.182171128  | 0.363117739  | TATDN3    | turquoise | -0.1419  | 0.489262 |
| TAF7      | tan       | -0.00245 | 0.990514 | CCDC15   | tan | 0.184409763  | 0.357149044  | ZC3H8     | turquoise | -0.14169 | 0.489918 |
| KATNAL1   | turquoise | -0.56035 | 0.002908 | ACTA2    | tan | 0.189313043  | 0.344280033  | ZCCHC16   | turquoise | -0.141   | 0.492067 |
| PPT2      | turquoise | -0.53893 | 0.0045   | BAZZA    | tan | 0.189628946  | 0.343460569  | DCAF13    | turquoise | -0.14085 | 0.492515 |
| ELF2      | turquoise | -0.51721 | 0.006814 | GALNT7   | tan | 0.197804609  | 0.322660593  | TSNAX     | turquoise | -0.14043 | 0.493816 |
| ARL17A    | turquoise | 0.492664 | 0.010559 | CRTAP    | tan | 0.201963324  | 0.312383307  | GALNS     | turquoise | -0.14038 | 0.493981 |
| DDX41     | turquoise | -0.48589 | 0.011851 | ASPHD2   | tan | 0.202541177  | 0.3109771453 | C11orf80  | turquoise | -0.13991 | 0.495444 |
| CRCP      | turquoise | 0.465423 | 0.016574 | ARCN1    | tan | 0.204898286  | 0.305253401  | MGLL      | turquoise | -0.13934 | 0.497203 |
| PARP2     | turquoise | -0.45496 | 0.019529 | ABI1     | tan | 0.209028729  | 0.295392455  | ELAC1     | turquoise | -0.13931 | 0.497321 |
| FLVCR1    | turquoise | -0.44528 | 0.022634 | C12orf29 | tan | 0.209832902  | 0.293496151  | MRE11A    | turquoise | -0.13922 | 0.497584 |
| ARRB1     | turquoise | -0.43454 | 0.026535 | PIGT     | tan | 0.21104752   | 0.29064655   | GFM1      | turquoise | -0.13905 | 0.498132 |
| PVALB     | turquoise | -0.428   | 0.029168 | TMEM19   | tan | 0.21266176   | 0.28688653   | CDKN2AIP  | turquoise | -0.13896 | 0.498401 |
| AGAP2     | turquoise | -0.42207 | 0.03173  | SSRP1    | tan | 0.214672672  | 0.282245863  | DYNL2     | turquoise | -0.13855 | 0.499694 |
| ZSCAN18   | turquoise | -0.42181 | 0.031845 | WIPI1    | tan | 0.227576832  | 0.253609023  | CDKN2AIPN | turquoise | -0.13848 | 0.49991  |
| IFTS7     | turquoise | -0.42168 | 0.031905 | MEN1     | tan | 0.228259666  | 0.252148664  | FAM177A1  | turquoise | -0.13826 | 0.50058  |
| KBTBD4    | turquoise | -0.41998 | 0.032676 | DPM2     | tan | 0.238547404  | 0.230812027  | USP40     | turquoise | -0.13727 | 0.503684 |
| CIAPIN1   | turquoise | -0.41929 | 0.032992 | EIF2AK2  | tan | 0.253999236  | 0.201088624  | DTD2      | turquoise | -0.13723 | 0.503806 |
| PZRY12    | turquoise | -0.41879 | 0.033222 | SIDT2    | tan | 0.256478346  | 0.196576152  | PDCD11    | turquoise | -0.1369  | 0.50484  |
| MSC       | turquoise | -0.40731 | 0.038899 | SFTD2    | tan | 0.265818828  | 0.180201307  | COP5A     | turquoise | -0.1365  | 0.50611  |
| TINM13    | turquoise | -0.39935 | 0.043268 | ESYT1    | tan | 0.273216436  | 0.167925986  | TDP1      | turquoise | -0.13641 | 0.506382 |
| POLA1     | turquoise | -0.39836 | 0.043834 | CAPRIN2  | tan | 0.283101703  | 0.152459419  | ACSL3     | turquoise | -0.13639 | 0.506447 |
| ZNF639    | turquoise | -0.3953  | 0.045633 | SMAD4    | tan | 0.283839663  | 0.151347097  | PIGF      | turquoise | -0.13609 | 0.507414 |
| SGPP1     | turquoise | 0.393908 | 0.04647  | EIF4G1   | tan | 0.285144346  | 0.149394773  | AMACR     | turquoise | -0.13599 | 0.507716 |
| HTATSF1   | turquoise | -0.38783 | 0.050268 | PRPF31   | tan | 0.286876231  | 0.146831133  | YAE1D1    |           |          |          |

Table 6. Gene module membership and correlation with growth rate (48/72h), with adjusted p values for each module

|           |           |          |          |           |           |              |             |           |           |          |          |
|-----------|-----------|----------|----------|-----------|-----------|--------------|-------------|-----------|-----------|----------|----------|
| ABHD11    | turquoise | -0.37635 | 0.058092 | PPAP2B    | tan       | 0.312488368  | 0.112526183 | PUS7      | turquoise | -0.13447 | 0.512523 |
| ORAI2     | turquoise | -0.37491 | 0.059137 | TAB1      | tan       | 0.3138588    | 0.110874707 | STIM2     | turquoise | -0.13433 | 0.512942 |
| CGorf162  | turquoise | -0.37444 | 0.059482 | UBTF      | tan       | 0.313917947  | 0.110803837 | CCDC7     | turquoise | -0.13377 | 0.514739 |
| HSPA1A    | turquoise | 0.37444  | 0.059485 | G6PC3     | tan       | 0.323413793  | 0.099855434 | FAM175A   | turquoise | -0.13375 | 0.514788 |
| CEP290    | turquoise | -0.37321 | 0.060389 | SLC29A1   | tan       | 0.323905357  | 0.099311586 | TSEN15    | turquoise | -0.13357 | 0.515373 |
| TF13      | turquoise | -0.37022 | 0.062644 | DCAF5     | tan       | 0.326612302  | 0.096356374 | VPS54     | turquoise | -0.13326 | 0.516337 |
| BTN3A1    | turquoise | -0.37012 | 0.062719 | LRRRC25   | tan       | 0.328440344  | 0.094398347 | EPB414A   | turquoise | -0.13285 | 0.517663 |
| SSH3      | turquoise | -0.36952 | 0.063182 | RPA1      | tan       | 0.333950132  | 0.088677655 | C20orf194 | turquoise | -0.13272 | 0.518062 |
| LDB1      | turquoise | -0.36895 | 0.063624 | RNF31     | tan       | 0.334827136  | 0.087791814 | ZNF383    | turquoise | -0.13256 | 0.518561 |
| NMB       | turquoise | -0.36723 | 0.064965 | MED18     | tan       | 0.338600712  | 0.084056431 | NOC3L     | turquoise | -0.13253 | 0.518672 |
| UBE2L6    | turquoise | -0.36598 | 0.065951 | MPI       | tan       | 0.341645814  | 0.081131169 | MFN1      | turquoise | -0.13244 | 0.518945 |
| ZMYND19   | turquoise | -0.36457 | 0.06708  | ZNF658    | tan       | 0.344565562  | 0.078399763 | ZNHIT3    | turquoise | -0.13216 | 0.519856 |
| NMI       | turquoise | -0.35876 | 0.071893 | NAGA      | tan       | 0.347119218  | 0.076068896 | UTP23     | turquoise | -0.13214 | 0.51992  |
| LRPAP1    | turquoise | -0.35842 | 0.07218  | PRR3      | tan       | 0.348223327  | 0.075077695 | HELB      | turquoise | -0.1314  | 0.522277 |
| ABHD14A   | turquoise | -0.35789 | 0.072632 | PIAS3     | tan       | 0.349101981  | 0.074295988 | IPO4      | turquoise | -0.13119 | 0.522948 |
| NIPSNAP1  | turquoise | -0.3571  | 0.073309 | TPRG1     | tan       | 0.350683618  | 0.072904607 | C1orf131  | turquoise | -0.13119 | 0.522957 |
| HFE       | turquoise | -0.35616 | 0.074125 | DPAGT1    | tan       | 0.354068319  | 0.069994332 | PTPLAD2   | turquoise | -0.13107 | 0.523314 |
| NDRG3     | turquoise | -0.35181 | 0.077984 | PPP1R21   | tan       | 0.354731542  | 0.069434705 | SLC27A1   | turquoise | -0.13059 | 0.524857 |
| MRPS28    | turquoise | -0.35136 | 0.078392 | IDH3G     | tan       | 0.355627688  | 0.068684021 | WBP4      | turquoise | -0.12993 | 0.526968 |
| NHLRC2    | turquoise | -0.35109 | 0.078641 | C11orf49  | tan       | 0.356379375  | 0.068059186 | C1orf63   | turquoise | -0.12946 | 0.528484 |
| MRP11     | turquoise | -0.3498  | 0.079817 | FAM208A   | tan       | 0.365667019  | 0.060695511 | PWP2      | turquoise | -0.12941 | 0.52866  |
| UQCRR     | turquoise | -0.34885 | 0.080695 | RAB2B     | tan       | 0.378345666  | 0.051660968 | TMEM70    | turquoise | -0.12926 | 0.529137 |
| ZWILCH    | turquoise | -0.348   | 0.081485 | RTF1      | tan       | 0.378931827  | 0.051270375 | ARL2BP    | turquoise | -0.12916 | 0.52945  |
| SEC16B    | turquoise | -0.34766 | 0.081808 | HDLBP     | tan       | 0.380611469  | 0.050163967 | RAB28     | turquoise | -0.12915 | 0.529469 |
| PLAC8     | turquoise | -0.3475  | 0.081961 | KPNA6     | tan       | 0.390559059  | 0.043990825 | NAA20     | turquoise | -0.12901 | 0.529925 |
| RPL13A    | turquoise | -0.34708 | 0.082356 | NABP2     | tan       | 0.399989135  | 0.038709799 | CHTOP     | turquoise | -0.12889 | 0.530306 |
| FAM168A   | turquoise | -0.34568 | 0.083681 | KAT7      | tan       | 0.40023356   | 0.038579962 | ZNF513    | turquoise | -0.12887 | 0.53037  |
| NAT1      | turquoise | -0.34425 | 0.085054 | YIF1B     | tan       | 0.413695501  | 0.031947938 | CYP20A1   | turquoise | -0.12881 | 0.530579 |
| UBE2W     | turquoise | -0.34297 | 0.086294 | TRMT10B   | tan       | 0.423219176  | 0.027835433 | ZNF398    | turquoise | -0.12843 | 0.531788 |
| ZNF688    | turquoise | -0.34209 | 0.087159 | MIIP      | tan       | 0.441721172  | 0.021069746 | SMG8      | turquoise | -0.12822 | 0.532473 |
| TM75F3    | turquoise | -0.3403  | 0.088937 | VAMP8     | tan       | 0.443873584  | 0.020378686 | HSCB      | turquoise | -0.12796 | 0.533325 |
| KIF3B     | turquoise | -0.33666 | 0.092625 | CD52      | tan       | 0.447978904  | 0.019112026 | EPC1      | turquoise | -0.12794 | 0.533366 |
| NIF3L1    | turquoise | -0.33654 | 0.092749 | SLCSA6    | tan       | 0.47197066   | 0.012935144 | SFR1      | turquoise | -0.12784 | 0.533717 |
| MRPL54    | turquoise | -0.33545 | 0.093876 | COG1      | tan       | 0.482672848  | 0.010772321 | HMBXO1    | turquoise | -0.12775 | 0.53398  |
| ATG5      | turquoise | -0.33464 | 0.094719 | TMEM106C  | tan       | 0.527729162  | 0.00466899  | SCYL2     | turquoise | -0.12772 | 0.534095 |
| CDK1      | turquoise | -0.33366 | 0.095751 | UNG       | tan       | 0.563346068  | 0.002215598 | POLR3B    | turquoise | -0.12764 | 0.534358 |
| FAM53B    | turquoise | -0.33242 | 0.097068 | ARRDC4    | turquoise | -0.575510033 | 0.001684686 | DNAA4     | turquoise | -0.12731 | 0.535421 |
| TAZ       | turquoise | -0.3324  | 0.09709  | HELQ      | turquoise | -0.552747816 | 0.002789557 | FAM219B   | turquoise | -0.12708 | 0.536163 |
| ATP5O     | turquoise | -0.33196 | 0.097567 | DDX41     | turquoise | -0.544941386 | 0.003289769 | TOMM70A   | turquoise | -0.12669 | 0.537429 |
| GPR133    | turquoise | 0.331554 | 0.097997 | MTX3      | turquoise | -0.531331633 | 0.00434558  | SLC17A9   | turquoise | -0.1266  | 0.537718 |
| SP1       | turquoise | -0.3301  | 0.099571 | ZNF131    | turquoise | -0.525614609 | 0.004868171 | HAUS2     | turquoise | -0.12658 | 0.537765 |
| UFSP2     | turquoise | -0.32953 | 0.100195 | HAUS8     | turquoise | -0.51713543  | 0.005740875 | LINC00493 | turquoise | -0.1263  | 0.538675 |
| PRR11     | turquoise | -0.32897 | 0.100809 | LOC731275 | turquoise | -0.515558523 | 0.005916953 | PRKAA1    | turquoise | -0.12624 | 0.538881 |
| SNRNP     | turquoise | -0.32851 | 0.101305 | GTPBP8    | turquoise | -0.504844886 | 0.007238305 | EFHA1     | turquoise | -0.12601 | 0.539631 |
| ACTR6     | turquoise | -0.32769 | 0.102217 | CCNH      | turquoise | -0.502344164 | 0.00758011  | C17orf70  | turquoise | -0.12599 | 0.5397   |
| PCNA      | turquoise | -0.32745 | 0.102481 | RANBP2    | turquoise | -0.4925132   | 0.009058313 | DDX47     | turquoise | -0.12586 | 0.540102 |
| CHCHD4    | turquoise | -0.32346 | 0.106983 | WIBG      | turquoise | -0.491641592 | 0.009200273 | SLCO2B1   | turquoise | -0.12558 | 0.541024 |
| MRPL16    | turquoise | -0.32255 | 0.108037 | PLEKHG2   | turquoise | -0.483338949 | 0.010648345 | GPCPD1    | turquoise | -0.12532 | 0.541858 |
| CMC4      | turquoise | -0.32186 | 0.108828 | WWP1      | turquoise | -0.475486826 | 0.012188034 | ZFP106    | turquoise | -0.12464 | 0.544089 |
| NMNA1     | turquoise | -0.32158 | 0.109164 | C1orf198  | turquoise | -0.471829048 | 0.012966011 | AHR       | turquoise | -0.12455 | 0.544368 |
| SCARNA16  | turquoise | -0.32011 | 0.110884 | PPP1CC    | turquoise | -0.470847854 | 0.01318157  | NR2C1     | turquoise | -0.12406 | 0.54598  |
| TMEM42    | turquoise | -0.31837 | 0.112949 | RINT1     | turquoise | -0.469474239 | 0.013488323 | RHOBTB3   | turquoise | -0.12404 | 0.546043 |
| LACTB     | turquoise | -0.31348 | 0.118897 | TMEM106B  | turquoise | -0.464788007 | 0.014579702 | ID2       | turquoise | -0.124   | 0.546152 |
| SOC3S     | turquoise | -0.31289 | 0.119629 | SOS2      | turquoise | -0.464274906 | 0.01470351  | C20orf94  | turquoise | -0.12399 | 0.546186 |
| XPNPEP1   | turquoise | -0.31271 | 0.119851 | ITGB8     | turquoise | -0.459780481 | 0.015825583 | TRIM44    | turquoise | -0.1238  | 0.546812 |
| ER12      | turquoise | -0.31234 | 0.120316 | BCL7B     | turquoise | -0.459528595 | 0.015890505 | CORO1C    | turquoise | -0.12368 | 0.547217 |
| ITFG3     | turquoise | -0.31222 | 0.120465 | VPS37C    | turquoise | -0.457360931 | 0.016458305 | SPATA7    | turquoise | -0.12367 | 0.547238 |
| GC2       | turquoise | -0.311   | 0.121998 | FAM53B    | turquoise | -0.453176286 | 0.017601742 | DENR      | turquoise | -0.12353 | 0.547689 |
| RNPEP     | turquoise | -0.31039 | 0.122767 | PEX19     | turquoise | -0.452518993 | 0.01778714  | IDNK      | turquoise | -0.12311 | 0.549078 |
| STK36     | turquoise | -0.31022 | 0.12298  | PIK3CA    | turquoise | -0.451923311 | 0.017956543 | INDK      | turquoise | -0.12265 | 0.550571 |
| XAF1      | turquoise | -0.30946 | 0.123954 | IL13RA1   | turquoise | -0.442634607 | 0.020774173 | VOPP1     | turquoise | -0.12248 | 0.551132 |
| GALNS     | turquoise | -0.3083  | 0.125449 | GORASP2   | turquoise | -0.441774821 | 0.021052292 | AP3D1     | turquoise | -0.12245 | 0.551229 |
| ZNF823    | turquoise | -0.30817 | 0.125614 | SUCLA2    | turquoise | -0.440169318 | 0.021579776 | XRN1      | turquoise | -0.12244 | 0.551275 |
| CCDC86    | turquoise | -0.30741 | 0.126591 | XPO4      | turquoise | -0.437780596 | 0.022384512 | CISD2     | turquoise | -0.12205 | 0.552554 |
| SMC4      | turquoise | -0.3073  | 0.126743 | MSI2      | turquoise | -0.433526705 | 0.023878126 | COPB1     | turquoise | -0.12192 | 0.552968 |
| UBE3C     | turquoise | -0.30721 | 0.126849 | RXRA      | turquoise | -0.430386463 | 0.025031929 | GLYR1     | turquoise | -0.12189 | 0.553056 |
| ANP32E    | turquoise | -0.30598 | 0.128466 | NOP2      | turquoise | -0.425271123 | 0.027008064 | PTEN      | turquoise | -0.12169 | 0.553717 |
| LGALS8    | turquoise | -0.30547 | 0.129128 | DUT       | turquoise | -0.421175148 | 0.028679869 | DAP3      | turquoise | -0.12161 | 0.554    |
| GPR160    | turquoise | -0.30451 | 0.130404 | ARP3      | turquoise | -0.421003983 | 0.028751509 | ADI1      | turquoise | -0.12157 | 0.554114 |
| DNAI1C1   | turquoise | -0.3044  | 0.130546 | DR1       | turquoise | -0.420422836 | 0.028995827 | SNX13     | turquoise | -0.12131 | 0.554964 |
| GHDG      | turquoise | 0.303777 | 0.131377 | MMADHC    | turquoise | -0.416775067 | 0.030567914 | DEK       | turquoise | -0.121   | 0.555974 |
| HAT1      | turquoise | -0.30267 | 0.132863 | CDC73     | turquoise | -0.416733397 | 0.030586261 | SYF2      | turquoise | -0.12094 | 0.556202 |
| ANKRD26   | turquoise | -0.30245 | 0.133159 | METTL2A   | turquoise | -0.416379794 | 0.03074231  | IGBP1     | turquoise | -0.12087 | 0.556405 |
| GSMT2     | turquoise | -0.30138 | 0.1346   | ARNTL2    | turquoise | -0.415261838 | 0.031239898 | MCTS1     | turquoise | -0.12078 | 0.556719 |
| RAB11FIP4 | turquoise | -0.30118 | 0.134879 | ZMI22     | turquoise | -0.414793078 | 0.031450457 | RNF213    | turquoise | -0.12077 | 0.556754 |
| ZNF436    | turquoise | -0.30061 | 0.135654 | MT1M      | turquoise | -0.414565251 | 0.031553204 | MDM2      | turquoise | -0.12076 | 0.556767 |
| GSTK1     | turquoise | -0.29723 | 0.140312 | MS4A14    | turquoise | -0.414213594 | 0.031712328 | POLR2B    | turquoise | -0.12057 | 0.557401 |
| STK4      | turquoise | -0.29701 | 0.140625 | MAN2C1    | turquoise | -0.410862207 | 0.033261433 | CEBP2     | turquoise | -0.11989 | 0.559637 |
| DHFR      | turquoise | -0.29689 | 0.140789 | PWWP2A    | turquoise | -0.407088663 | 0.035077758 | C15orf37  | turquoise | -0.11963 | 0.560491 |
| TMEM205   | turquoise | -0.29682 | 0.140886 | SREK1     | turquoise | -0.405759502 | 0.035736118 | BLHM      | turquoise | -0.11933 | 0.561484 |
| SCYL3     | turquoise | -0.29663 | 0.141116 | SRF       | turquoise | -0.400914625 | 0.038220018 | FER       | turquoise | -0.11921 | 0.561893 |
| C14orf101 | turquoise | -0.29607 | 0.141953 | LBX2-AS1  | turquoise | -0.400576336 | 0.038398468 | ACTR10    | turquoise | -0.11903 | 0.562482 |
| HMB5      | turquoise | -0.29576 | 0.142383 | LPP       | turquoise | -0.400234496 | 0.038579466 | GINM1     | turquoise | -0.11893 | 0.562827 |
| PAAF1     | turquoise | -0.29546 | 0.142812 | LRRRC8B   | turquoise | -0.399106003 | 0.039181815 | EIF5      | turquoise | -0.11885 | 0.563082 |
| ITGB2     | turquoise | -0.29495 | 0.143535 | PTPN1     | turquoise | -0.396071272 | 0.040838866 | RM11      | turquoise | -0.11873 | 0.563486 |
| BCKDHA    | turquoise | -0.2947  | 0.143885 | NOL11     | turquoise | -0.395980224 | 0.040889428 | SNORA75   | turquoise | -0.1187  | 0.563595 |
| CAAP1     | turquoise | -0.29354 | 0.145541 | TMEM113   | turquoise | -0.395008096 | 0.041432392 | SCFD1     | turquoise | -0.11858 | 0.563969 |
| SCARNA9   | turquoise | 0.292201 | 0.147478 | CD302     | turquoise | -0.392827027 | 0.042671433 | S1PR4     | turquoise | -0.11849 | 0.564277 |
| JC1005064 | turquoise | 0.292085 | 0.147647 | FLVCR1    | turquoise | -0.392415169 | 0.042908669 | TMEM180   | turquoise | -0.11848 | 0.564313 |
| JC1001909 | turquoise | 0.291659 | 0.148266 | EXOC2     | turquoise | -0.391883946 | 0.043216205 | C3orf14   | turquoise | -0.11837 | 0.56468  |
| C4orf29   | turquoise | -0.29097 | 0.149265 | ME2       | turquoise | -0.391658504 | 0.043347245 | AGPAT5    | turquoise | -0.11835 | 0.564736 |
| C15orf39  | turquoise | -0.2908  | 0.149517 | FOCAD     | turquoise | -0.391624731 | 0.043366903 | ZFYVE28   | turquoise | -0.11832 | 0.564827 |
| NAP1L4    | turquoise | -0.29015 | 0.150479 | ZNF570    | turquoise | -0.390595274 | 0.043969506 | C5orf28   | turquoise | -0.11829 | 0.564924 |

Table 6. Gene module membership and correlation with growth rate (48/72h), with adjusted p values for each module

|           |           |          |          |           |           |              |             |          |           |          |          |
|-----------|-----------|----------|----------|-----------|-----------|--------------|-------------|----------|-----------|----------|----------|
| C1Sorf40  | turquoise | -0.28403 | 0.15966  | POLM      | turquoise | -0.381100478 | 0.049845404 | ZNF227   | turquoise | -0.11695 | 0.569382 |
| RWD03     | turquoise | -0.28395 | 0.15978  | CHERP     | turquoise | -0.380835108 | 0.05001808  | TMA16    | turquoise | -0.11683 | 0.569785 |
| SFPQ      | turquoise | 0.283554 | 0.160395 | SH2B1     | turquoise | -0.379914575 | 0.050620721 | AKT1S1   | turquoise | -0.11648 | 0.570957 |
| FXN       | turquoise | -0.28324 | 0.16088  | AMN1      | turquoise | -0.379535089 | 0.050870812 | UBE4B    | turquoise | -0.11636 | 0.57136  |
| HAU52     | turquoise | -0.28322 | 0.160906 | KATNAL1   | turquoise | -0.378368094 | 0.05164598  | SEPT7P2  | turquoise | -0.11634 | 0.571424 |
| RPPH1     | turquoise | -0.28098 | 0.164383 | ST13      | turquoise | -0.378057884 | 0.051853586 | AIDA     | turquoise | -0.11607 | 0.572313 |
| FBX048    | turquoise | -0.28054 | 0.165073 | EVI2B     | turquoise | -0.376553781 | 0.052869503 | CACYBP   | turquoise | -0.11588 | 0.572952 |
| GOLGA1    | turquoise | -0.28051 | 0.165122 | DDX46     | turquoise | -0.375268994 | 0.053749586 | GTF2H3   | turquoise | -0.11576 | 0.573332 |
| TLR7      | turquoise | -0.28035 | 0.165375 | ZDHHC2    | turquoise | -0.373960295 | 0.054657804 | APOBEC3C | turquoise | -0.11549 | 0.574253 |
| MAFK      | turquoise | 0.28014  | 0.165708 | SLC9A3R1  | turquoise | -0.372818797 | 0.054549751 | ACAT1    | turquoise | -0.11518 | 0.575282 |
| UTP18     | turquoise | -0.27975 | 0.166316 | PRR12     | turquoise | -0.371059896 | 0.05671342  | SMC2     | turquoise | -0.1147  | 0.576872 |
| PLAC2     | turquoise | -0.27938 | 0.166905 | FAM89B    | turquoise | -0.37028313  | 0.057274059 | NAF1     | turquoise | -0.11462 | 0.57714  |
| WDR60     | turquoise | -0.27932 | 0.167002 | ACTR6     | turquoise | -0.369177118 | 0.058079784 | BTNA1    | turquoise | -0.11432 | 0.578155 |
| SEC23B    | turquoise | -0.27923 | 0.167151 | RNF8      | turquoise | -0.368106837 | 0.058867866 | NUP35    | turquoise | -0.11429 | 0.578246 |
| WDR44     | turquoise | -0.27915 | 0.167268 | MYO1G     | turquoise | -0.367945151 | 0.058987641 | EAPP     | turquoise | -0.11425 | 0.578374 |
| TFAM      | turquoise | -0.27904 | 0.167447 | FGFR10P   | turquoise | -0.366769391 | 0.059864348 | WANSK7   | turquoise | -0.11387 | 0.579654 |
| ITFG1     | turquoise | -0.27876 | 0.167887 | FASTKD1   | turquoise | -0.364800874 | 0.061354834 | ANKRD26  | turquoise | -0.11353 | 0.580811 |
| COP57A    | turquoise | -0.27743 | 0.170008 | PMS1      | turquoise | -0.363930345 | 0.062023088 | MPST     | turquoise | -0.11327 | 0.581668 |
| MAGOHB    | turquoise | 0.277302 | 0.170218 | HPS1      | turquoise | -0.363290162 | 0.062518113 | AKAP9    | turquoise | -0.11322 | 0.581849 |
| MGLL      | turquoise | -0.27699 | 0.170727 | CLIP4     | turquoise | -0.36317239  | 0.062609513 | ATPAF1   | turquoise | -0.11317 | 0.581995 |
| C11orf80  | turquoise | -0.27685 | 0.170947 | MOB3A     | turquoise | -0.362593261 | 0.063060474 | FCF1     | turquoise | -0.11299 | 0.582608 |
| TUBGCP5   | turquoise | -0.27591 | 0.172463 | PPP2R5A   | turquoise | -0.36239946  | 0.063211946 | TMEM86A  | turquoise | -0.11281 | 0.583226 |
| NLN       | turquoise | -0.27563 | 0.172911 | GRIPAP1   | turquoise | -0.360487168 | 0.064721731 | ZNF766   | turquoise | -0.11267 | 0.583703 |
| SLC20A2   | turquoise | -0.27562 | 0.172936 | PMPEP1    | turquoise | -0.359142269 | 0.065800162 | OSBPL9   | turquoise | -0.11255 | 0.584107 |
| TMEM126E  | turquoise | -0.27496 | 0.17401  | LYPLA1    | turquoise | -0.355665215 | 0.068652722 | ZNF385A  | turquoise | -0.11246 | 0.584387 |
| PANK2     | turquoise | -0.27418 | 0.175277 | MRPL3     | turquoise | -0.355314108 | 0.068945986 | TMEM41B  | turquoise | -0.11236 | 0.584721 |
| IGHMBP2   | turquoise | -0.27365 | 0.176144 | TTCT1B    | turquoise | -0.354997386 | 0.069211356 | NDUF86   | turquoise | -0.11235 | 0.584764 |
| PIK3R4    | turquoise | -0.27358 | 0.176271 | LYRM4     | turquoise | -0.352193044 | 0.071595489 | SNX14    | turquoise | -0.11232 | 0.584884 |
| RNH1      | turquoise | -0.27282 | 0.177511 | DEC1      | turquoise | -0.349685576 | 0.073780244 | FOXK1    | turquoise | -0.11227 | 0.585038 |
| SNHG16    | turquoise | -0.27251 | 0.17803  | CP5F2     | turquoise | -0.349602992 | 0.07385306  | RNF219   | turquoise | -0.11213 | 0.5855   |
| EXOC6     | turquoise | -0.2717  | 0.179379 | UBE2E3    | turquoise | -0.34909085  | 0.074305833 | GTF2H1   | turquoise | -0.11201 | 0.585909 |
| GPAM      | turquoise | -0.27109 | 0.18039  | PAIP2     | turquoise | -0.346318726 | 0.076793769 | PGRMC2   | turquoise | -0.11192 | 0.586219 |
| DC1005069 | turquoise | -0.27011 | 0.18203  | MTERF     | turquoise | -0.345997106 | 0.07708649  | PCNA     | turquoise | -0.11168 | 0.587015 |
| TUFM      | turquoise | -0.2699  | 0.182379 | MDC1      | turquoise | -0.345985974 | 0.077096637 | ZNF121   | turquoise | -0.11162 | 0.587227 |
| AMIGO3    | turquoise | 0.269133 | 0.18368  | ELMO1     | turquoise | -0.344661354 | 0.078311356 | RARG     | turquoise | -0.11146 | 0.58778  |
| FBXW8     | turquoise | -0.26893 | 0.18402  | TUBD1     | turquoise | -0.342605025 | 0.080225958 | DHX40    | turquoise | -0.1113  | 0.588293 |
| MED27     | turquoise | -0.26739 | 0.186651 | HDFGRP2   | turquoise | -0.340434429 | 0.082285446 | PHAX     | turquoise | -0.11122 | 0.58856  |
| C2orf68   | turquoise | -0.26734 | 0.18673  | BLZF1     | turquoise | -0.340310222 | 0.082404501 | FAM45A   | turquoise | -0.11112 | 0.588647 |
| MPHOSPH8  | turquoise | -0.26723 | 0.186912 | UFM1      | turquoise | -0.33872578  | 0.08393473  | TMEM209  | turquoise | -0.11077 | 0.590094 |
| ZNF271    | turquoise | 0.26723  | 0.186919 | DHX37     | turquoise | -0.338229224 | 0.08441871  | AMOTL1   | turquoise | -0.11073 | 0.590235 |
| VPS35     | turquoise | -0.26722 | 0.186935 | GOLGB1    | turquoise | -0.337676933 | 0.084959498 | FUNIN    | turquoise | -0.11066 | 0.590459 |
| SMC2      | turquoise | -0.26696 | 0.187386 | CDC42BPB  | turquoise | -0.337068218 | 0.085558576 | GNPDA2   | turquoise | -0.11062 | 0.590601 |
| PI4KB2    | turquoise | -0.26692 | 0.187455 | PHRF1     | turquoise | -0.336952308 | 0.085673013 | DHTKD1   | turquoise | -0.11052 | 0.590939 |
| ING2      | turquoise | -0.26635 | 0.188425 | ADRBK2    | turquoise | -0.336864888 | 0.085759399 | RBL1     | turquoise | -0.11048 | 0.591062 |
| ZCRB1     | turquoise | -0.26599 | 0.189054 | SERPINB1  | turquoise | -0.336630096 | 0.08599174  | TRIO     | turquoise | -0.1102  | 0.592014 |
| NDUFAB8   | turquoise | -0.26538 | 0.190103 | UBE3C     | turquoise | -0.335774718 | 0.086842229 | TRABD    | turquoise | -0.11014 | 0.592233 |
| LOC440944 | turquoise | -0.26501 | 0.190746 | RENBP     | turquoise | -0.335262252 | 0.087354807 | RBM8A    | turquoise | -0.10903 | 0.595979 |
| CPE       | turquoise | -0.26431 | 0.191961 | PCBD2     | turquoise | -0.334258885 | 0.088365024 | POT1     | turquoise | -0.10901 | 0.596045 |
| CD2       | turquoise | -0.26371 | 0.193007 | BTF3L4    | turquoise | -0.334097346 | 0.088528488 | ZC3H3    | turquoise | -0.1089  | 0.596423 |
| FBX04     | turquoise | -0.26345 | 0.193477 | ZNF746    | turquoise | -0.333836634 | 0.088792789 | ZDHHC8   | turquoise | -0.1087  | 0.597108 |
| TPCN2     | turquoise | -0.26336 | 0.193618 | TRPCAP    | turquoise | -0.332836405 | 0.089812325 | FAM13B   | turquoise | -0.10831 | 0.598426 |
| C1orf131  | turquoise | -0.26316 | 0.19397  | PHKB      | turquoise | -0.332259138 | 0.090404744 | PSMG1    | turquoise | -0.10793 | 0.599703 |
| RPRD2     | turquoise | -0.26278 | 0.194645 | INF2      | turquoise | -0.331093741 | 0.091609715 | PDFN1    | turquoise | -0.10792 | 0.599751 |
| PBXIP1    | turquoise | -0.26142 | 0.197059 | DYNLL1    | turquoise | -0.33017697  | 0.092566095 | GOLGA4   | turquoise | -0.10792 | 0.599755 |
| IFNAR1    | turquoise | -0.26065 | 0.198426 | HIST1H4F  | turquoise | -0.329839952 | 0.092919558 | HAT1     | turquoise | -0.10782 | 0.600092 |
| CDK11     | turquoise | -0.26046 | 0.198769 | ZNF35     | turquoise | -0.329711247 | 0.093054812 | SPOPL    | turquoise | -0.10754 | 0.601031 |
| ADAP1     | turquoise | -0.25989 | 0.199787 | ZNF394    | turquoise | -0.329543628 | 0.093231181 | KRAS     | turquoise | -0.10743 | 0.601411 |
| IQCC      | turquoise | -0.25938 | 0.200697 | FAM179B   | turquoise | -0.329409438 | 0.093372557 | EP515    | turquoise | -0.10741 | 0.601497 |
| LOC550643 | turquoise | -0.25878 | 0.201775 | NOL9      | turquoise | -0.328558395 | 0.094272937 | SENP6    | turquoise | -0.1072  | 0.602197 |
| ATPB04    | turquoise | -0.25872 | 0.201882 | LRRC37BP1 | turquoise | -0.32843186  | 0.094407364 | LPCHAT2  | turquoise | -0.10707 | 0.60264  |
| POLR2J    | turquoise | -0.258   | 0.20319  | ARL2      | turquoise | -0.327788728 | 0.095092834 | SHOC2    | turquoise | -0.10677 | 0.603667 |
| TNFSF12   | turquoise | -0.25741 | 0.204269 | GTF2F2    | turquoise | -0.326209465 | 0.096791924 | CEP72    | turquoise | -0.10676 | 0.603688 |
| SLC25A36  | turquoise | -0.25735 | 0.20436  | ZBTB38    | turquoise | -0.326031709 | 0.096984584 | PAXIP1   | turquoise | -0.10657 | 0.604336 |
| FAM177A1  | turquoise | -0.25705 | 0.204913 | ZUFSP     | turquoise | -0.325685624 | 0.097360514 | HYOU1    | turquoise | -0.10622 | 0.605535 |
| SLC7A5    | turquoise | 0.256531 | 0.205863 | KIAA2026  | turquoise | -0.325482819 | 0.097581314 | DMTF1    | turquoise | -0.10616 | 0.605752 |
| FAM89B    | turquoise | -0.25653 | 0.205871 | KIAA1551  | turquoise | -0.325421512 | 0.097648134 | SKAP2    | turquoise | -0.10615 | 0.605797 |
| LLGL1     | turquoise | -0.25628 | 0.206328 | PHLDA3    | turquoise | -0.325000349 | 0.098108104 | SRPK2    | turquoise | -0.10598 | 0.60636  |
| UQCRR     | turquoise | -0.25552 | 0.207712 | TMEM109   | turquoise | -0.324671513 | 0.098468367 | SMIM4    | turquoise | -0.10562 | 0.60759  |
| TSPAN14   | turquoise | -0.25533 | 0.208067 | PDZD11    | turquoise | -0.324330452 | 0.098843068 | METTL6   | turquoise | -0.10559 | 0.607711 |
| DDY23     | turquoise | -0.25524 | 0.208238 | WAS       | turquoise | -0.324209006 | 0.098886583 | TTCl9    | turquoise | -0.10555 | 0.607818 |
| ANKS1A    | turquoise | -0.25489 | 0.208888 | RBM45     | turquoise | -0.323600107 | 0.099649042 | GOLGA1   | turquoise | -0.10555 | 0.607821 |
| NAE1      | turquoise | -0.25488 | 0.208902 | HNRPLL    | turquoise | -0.323349828 | 0.099926366 | NUP107   | turquoise | -0.10517 | 0.609141 |
| CAPZA2    | turquoise | -0.25451 | 0.209583 | LOC728407 | turquoise | -0.323345443 | 0.099931231 | CWF19L2  | turquoise | -0.10515 | 0.609184 |
| MSH3      | turquoise | -0.25346 | 0.211536 | LIAS      | turquoise | -0.323020876 | 0.100291744 | BSDC1    | turquoise | -0.10471 | 0.610694 |
| LAMP2     | turquoise | -0.25318 | 0.212053 | PRR11     | turquoise | -0.32257385  | 0.100789869 | MGAT2    | turquoise | -0.1047  | 0.610757 |
| FBX05     | turquoise | 0.253148 | 0.212117 | WDSUB1    | turquoise | -0.321705484 | 0.10176278  | DYRK1A   | turquoise | -0.10465 | 0.610918 |
| XRN1      | turquoise | -0.25305 | 0.212299 | SLC30A5   | turquoise | -0.320678774 | 0.10292213  | GNA11    | turquoise | -0.1046  | 0.611077 |
| DDX46     | turquoise | -0.2523  | 0.213712 | UTRN      | turquoise | -0.320424342 | 0.10321095  | HELZ     | turquoise | -0.10448 | 0.611481 |
| RPRD1A    | turquoise | -0.25224 | 0.213825 | USP10     | turquoise | -0.320025063 | 0.103665412 | POR      | turquoise | -0.1042  | 0.612454 |
| PGAM5     | turquoise | -0.25196 | 0.214343 | TRIQK     | turquoise | -0.319916852 | 0.103788835 | KDEL3    | turquoise | -0.10385 | 0.613645 |
| GBAS      | turquoise | -0.25193 | 0.214393 | MRPL30    | turquoise | -0.319597441 | 0.104153786 | TSR1     | turquoise | -0.10369 | 0.614209 |
| SNRPC     | turquoise | -0.25185 | 0.21454  | ZMPSTE24  | turquoise | -0.318516518 | 0.10539592  | ARSB     | turquoise | -0.10329 | 0.61559  |
| ABCC5     | turquoise | -0.25183 | 0.21458  | C6orf162  | turquoise | -0.318237083 | 0.105718818 | TAI2     | turquoise | -0.10295 | 0.616762 |
| GRIPAP1   | turquoise | -0.25089 | 0.216366 | TCF25     | turquoise | -0.318017837 | 0.105972679 | ANAPC4   | turquoise | -0.10288 | 0.616981 |
| MLPH      | turquoise | -0.25009 | 0.21788  | CKS1B     | turquoise | -0.317786583 | 0.106240936 | TADA2B   | turquoise | -0.10261 | 0.617924 |
| MTM1      | turquoise | -0.24969 | 0.21863  | PPIP5K2   | turquoise | -0.314388248 | 0.110241515 | C5orf15  | turquoise | -0.10253 | 0.618208 |
| SEC22A    | turquoise | -0.24943 | 0.219135 | P4HB      | turquoise | -0.313597455 | 0.111188254 | HSPB1    | turquoise | -0.10248 | 0.618381 |
| MPEG1     | turquoise | -0.24919 | 0.219598 | ZNF623    | turquoise | -0.313046151 | 0.11185183  | YIPF2    | turquoise | -0.10211 | 0.619639 |
| RBM34     | turquoise | -0.24874 | 0.22045  | ZNF764    | turquoise | -0.311716915 | 0.113463808 | CBX3     | turquoise | -0.10204 | 0.619895 |
| FAM118B   | turquoise | -0.24855 | 0.220823 | NAA15     | turquoise | -0.311185087 | 0.114113548 | RNF167   | turquoise | -0.10162 | 0.621349 |
| APKAPK5-A | turquoise | -0.24797 | 0.221935 | MAPK7     | turquoise | -0.310638867 | 0.114783727 | ME3      | turquoise | -0.1015  | 0.621761 |
| SUGP2     | turquoise | -0.24789 | 0.222095 | VPS26A    | turquoise | -0.310098676 | 0.115449362 | HSP90B1  | turquoise | -0.10145 | 0.621907 |
| LACC1     | turquoise | -0.24734 | 0.223155 | DNAI2C4   | turquoise | -0.309796344 | 0.115       |          |           |          |          |

Table 6. Gene module membership and correlation with growth rate (48/72h), with adjusted p values for each module

|          |           |          |          |           |           |              |             |           |           |          |          |
|----------|-----------|----------|----------|-----------|-----------|--------------|-------------|-----------|-----------|----------|----------|
| DND1     | turquoise | -0.24439 | 0.228896 | ATPBD4    | turquoise | -0.30560592  | 0.121096173 | CBLL1     | turquoise | -0.09953 | 0.628577 |
| METTL2A  | turquoise | -0.2443  | 0.229077 | C17orf62  | turquoise | -0.305507275 | 0.12122239  | ATP5F     | turquoise | -0.09929 | 0.629392 |
| MYCBP    | turquoise | -0.24411 | 0.229435 | AGPAT3    | turquoise | -0.305382199 | 0.121382565 | STT3B     | turquoise | -0.09929 | 0.629412 |
| USMG5    | turquoise | -0.24378 | 0.23009  | CSNK1G2   | turquoise | -0.30364354  | 0.123625232 | KATNB1    | turquoise | -0.09914 | 0.629925 |
| C3orf14  | turquoise | -0.24371 | 0.230226 | SUMF1     | turquoise | -0.302524734 | 0.125084319 | RDH11     | turquoise | -0.09906 | 0.630208 |
| CNTLN    | turquoise | -0.2436  | 0.230458 | DROSHA    | turquoise | -0.301933971 | 0.125859823 | GPSM3     | turquoise | -0.09872 | 0.63136  |
| BRX1     | turquoise | -0.24352 | 0.230607 | RHOQ      | turquoise | -0.301726405 | 0.126133131 | STK38L    | turquoise | -0.09858 | 0.631844 |
| GLMN     | turquoise | -0.24314 | 0.23135  | ZDHH8     | turquoise | -0.301402154 | 0.126560948 | GCSHP3    | turquoise | -0.09845 | 0.632306 |
| HDAC2    | turquoise | -0.24306 | 0.231527 | PLGRKT    | turquoise | -0.299329336 | 0.129320904 | GALC      | turquoise | -0.09825 | 0.633024 |
| FNBP4    | turquoise | -0.24249 | 0.232647 | UBR7      | turquoise | -0.299156674 | 0.129552767 | DUSP5     | turquoise | -0.09817 | 0.633284 |
| MGMT     | turquoise | -0.24233 | 0.232957 | FAM3B     | turquoise | -0.298347622 | 0.130643253 | LGALS8    | turquoise | -0.09757 | 0.635372 |
| MAZ      | turquoise | -0.24195 | 0.233717 | TCEANC2   | turquoise | -0.298198447 | 0.130845047 | PPP2R1B   | turquoise | -0.09756 | 0.635393 |
| EIF3M    | turquoise | -0.2416  | 0.234428 | USP15     | turquoise | -0.298024209 | 0.131081031 | ERBB2IP   | turquoise | -0.09754 | 0.635467 |
| HSCB     | turquoise | -0.24135 | 0.234913 | DDX24     | turquoise | -0.296994244 | 0.132482323 | TRIM25    | turquoise | -0.09745 | 0.63579  |
| SUMF1    | turquoise | -0.24079 | 0.236039 | DICER1    | turquoise | -0.296486936 | 0.133176514 | BMPR1A    | turquoise | -0.09729 | 0.636366 |
| MBIP     | turquoise | -0.24056 | 0.236492 | ARV1      | turquoise | -0.296413415 | 0.133277338 | FBXO30    | turquoise | -0.0969  | 0.637706 |
| CP5F2    | turquoise | -0.2403  | 0.237015 | COL8A2    | turquoise | -0.295745817 | 0.134195393 | NAIF1     | turquoise | -0.09686 | 0.637863 |
| KXD1     | turquoise | 0.240105 | 0.237417 | DERA      | turquoise | -0.294495052 | 0.135927733 | KCTD2     | turquoise | -0.09678 | 0.638137 |
| ATPAF1   | turquoise | -0.23987 | 0.237881 | CWC15     | turquoise | -0.293585825 | 0.137197164 | PTRPM     | turquoise | -0.09674 | 0.638269 |
| IGBP1    | turquoise | -0.23978 | 0.23807  | ADNP      | turquoise | -0.293527496 | 0.137278893 | PACS1     | turquoise | -0.0966  | 0.638746 |
| C10orf54 | turquoise | -0.23908 | 0.239481 | NSL1      | turquoise | -0.290866041 | 0.141045621 | HYPK      | turquoise | -0.09652 | 0.639038 |
| CWC15    | turquoise | -0.23876 | 0.240135 | NDUFAF1   | turquoise | -0.290299557 | 0.141856886 | EXOC1     | turquoise | -0.09645 | 0.63928  |
| PIK3C3   | turquoise | -0.23801 | 0.241658 | ALAS1     | turquoise | -0.289956669 | 0.14234957  | WRN       | turquoise | -0.09576 | 0.641701 |
| NZF385A  | turquoise | -0.23791 | 0.241862 | TFAM      | turquoise | -0.288024434 | 0.145148992 | NFYB      | turquoise | -0.09544 | 0.64281  |
| FAM45A   | turquoise | -0.23782 | 0.242044 | DYRK1A    | turquoise | -0.287023902 | 0.146614012 | ZFP161    | turquoise | -0.09535 | 0.643124 |
| SLK      | turquoise | -0.23748 | 0.242748 | SP TAN1   | turquoise | -0.286630419 | 0.147193064 | ERGC2     | turquoise | -0.09519 | 0.643696 |
| VAMP7    | turquoise | -0.23725 | 0.243218 | H2AFY     | turquoise | -0.285828532 | 0.148378198 | ZC3H4     | turquoise | -0.09514 | 0.643865 |
| CCP110   | turquoise | -0.23709 | 0.243538 | ATG5      | turquoise | -0.285616624 | 0.148692524 | OSGEP11   | turquoise | -0.09512 | 0.643928 |
| POP4     | turquoise | -0.23646 | 0.244819 | EIF4E     | turquoise | -0.285302044 | 0.149160022 | ACBD6     | turquoise | -0.09502 | 0.644271 |
| ANLN     | turquoise | -0.23628 | 0.245208 | SH2B2     | turquoise | -0.284780087 | 0.149938025 | EARS2     | turquoise | -0.09494 | 0.644567 |
| MOV10    | turquoise | -0.23605 | 0.24567  | TIRAP     | turquoise | -0.284278824 | 0.150687912 | RB1CC2    | turquoise | -0.09486 | 0.644845 |
| C7orf23  | turquoise | -0.23552 | 0.246771 | CEPT1     | turquoise | -0.284021162 | 0.151074416 | CIRH1A    | turquoise | -0.09462 | 0.645672 |
| TRIM27   | turquoise | -0.23547 | 0.246867 | SLC35F5   | turquoise | -0.283362847 | 0.152065133 | MDM1      | turquoise | -0.09461 | 0.645715 |
| CRIP2    | turquoise | -0.23471 | 0.248436 | PUS7      | turquoise | -0.283151181 | 0.152384658 | EHMT2     | turquoise | -0.0941  | 0.647516 |
| C8orf59  | turquoise | -0.23456 | 0.248763 | ARAF      | turquoise | -0.28121097  | 0.15533592  | RLF       | turquoise | -0.09299 | 0.651407 |
| NTMT1    | turquoise | -0.23403 | 0.249862 | C18orf32  | turquoise | -0.280999766 | 0.155659622 | EXOC5     | turquoise | -0.09288 | 0.651774 |
| FADD     | turquoise | -0.234   | 0.249927 | CDK7      | turquoise | -0.280952059 | 0.155732807 | SMEK1     | turquoise | -0.09253 | 0.653001 |
| IDH1     | turquoise | -0.23337 | 0.25123  | RAB14     | turquoise | -0.280600884 | 0.156272281 | ZNF76     | turquoise | -0.09251 | 0.653079 |
| SCYL1    | turquoise | -0.23336 | 0.251242 | ZNF513    | turquoise | -0.280349505 | 0.156659265 | PMM2      | turquoise | -0.0924  | 0.653472 |
| SLC25A24 | turquoise | -0.23315 | 0.251696 | SAT1      | turquoise | -0.280251259 | 0.156810692 | NIPA2     | turquoise | -0.09226 | 0.653971 |
| ANAPC4   | turquoise | -0.23303 | 0.25195  | MCM8      | turquoise | -0.279299297 | 0.158283373 | WBPS      | turquoise | -0.09224 | 0.654021 |
| SYF2     | turquoise | -0.23241 | 0.25324  | BCKDHA    | turquoise | -0.279140005 | 0.158530753 | POLH      | turquoise | -0.0922  | 0.654179 |
| PUS7L    | turquoise | -0.23228 | 0.253516 | SEPLG     | turquoise | -0.278968332 | 0.158797668 | ARID2     | turquoise | -0.09205 | 0.654694 |
| INTS10   | turquoise | -0.23218 | 0.253728 | TMEM65    | turquoise | -0.278730277 | 0.159168321 | DHX32     | turquoise | -0.09198 | 0.654947 |
| LIX1L    | turquoise | -0.23214 | 0.253806 | ZNF451    | turquoise | -0.278481988 | 0.159555563 | KIAA1107  | turquoise | -0.09196 | 0.655011 |
| METTL2B  | turquoise | -0.23195 | 0.254217 | ITGB5     | turquoise | -0.277267024 | 0.161460113 | CCT3      | turquoise | -0.09165 | 0.65611  |
| RAD51C   | turquoise | -0.2319  | 0.254321 | NR2F6     | turquoise | -0.277201977 | 0.161562531 | RF3       | turquoise | -0.0912  | 0.657691 |
| PCIF1    | turquoise | -0.23178 | 0.254577 | AP2B1     | turquoise | -0.276575082 | 0.162551956 | TMEM165   | turquoise | -0.09099 | 0.658429 |
| IGF1R    | turquoise | -0.23177 | 0.254593 | NCOR1     | turquoise | -0.275675177 | 0.163979758 | CTBP2     | turquoise | -0.0907  | 0.659452 |
| CORO7    | turquoise | -0.23164 | 0.25487  | TNFAIP1   | turquoise | -0.275301295 | 0.164575564 | NUDT15    | turquoise | -0.0907  | 0.659461 |
| SLC39A7  | turquoise | 0.23154  | 0.255072 | SEPS5C    | turquoise | -0.275028614 | 0.165011063 | APC       | turquoise | -0.09064 | 0.659697 |
| SLC9A8   | turquoise | -0.23139 | 0.255381 | LIMA1     | turquoise | -0.273565784 | 0.167361249 | ZNF292    | turquoise | -0.09053 | 0.660064 |
| FAM160B1 | turquoise | -0.23128 | 0.255623 | FBXW8     | turquoise | -0.273044538 | 0.168204359 | PLS3      | turquoise | -0.0905  | 0.660166 |
| KIAA0528 | turquoise | -0.23121 | 0.255766 | RNF216P1  | turquoise | -0.272548857 | 0.169008888 | AASDHPPT  | turquoise | -0.09025 | 0.661052 |
| FUOM     | turquoise | -0.23027 | 0.257766 | RBM14     | turquoise | -0.270549922 | 0.1722808   | SH3BP2    | turquoise | -0.09013 | 0.661483 |
| ITGB5    | turquoise | -0.23022 | 0.257876 | RNF219    | turquoise | -0.27025009  | 0.172775381 | TEKT4R1   | turquoise | -0.0901  | 0.661606 |
| C5orf28  | turquoise | -0.22991 | 0.258537 | OGFR      | turquoise | -0.270059627 | 0.173090072 | TMEM126A  | turquoise | -0.08967 | 0.663111 |
| HSPB11   | turquoise | -0.22987 | 0.258604 | LACC1     | turquoise | -0.269963518 | 0.173249019 | BCAP29    | turquoise | -0.08966 | 0.663163 |
| GPCPD1   | turquoise | -0.22966 | 0.259056 | CDC6      | turquoise | -0.269420843 | 0.174148431 | PITPNA    | turquoise | -0.08963 | 0.663238 |
| EXOSC5   | turquoise | -0.22964 | 0.259104 | SUMO1     | turquoise | -0.268178494 | 0.176219768 | IDH1      | turquoise | -0.08961 | 0.663337 |
| ZNF451   | turquoise | -0.22942 | 0.259571 | TFE1      | turquoise | -0.267896121 | 0.176692956 | ERP4A     | turquoise | -0.0893  | 0.664408 |
| CDC27    | turquoise | -0.22942 | 0.259582 | MARCKS    | turquoise | -0.267244917 | 0.177787597 | ARG2      | turquoise | -0.08902 | 0.665426 |
| SEH1L    | turquoise | -0.22938 | 0.259648 | FHD01     | turquoise | -0.266766838 | 0.178594233 | STXB2     | turquoise | -0.08901 | 0.665445 |
| COX16    | turquoise | -0.22894 | 0.26059  | CAMTA1    | turquoise | -0.266689833 | 0.178724398 | FYB       | turquoise | -0.08834 | 0.667839 |
| ZNF576   | turquoise | -0.2288  | 0.260898 | IDE       | turquoise | -0.26639802  | 0.179218263 | ATP9B     | turquoise | -0.08822 | 0.668246 |
| OTUD3    | turquoise | 0.228183 | 0.262221 | C7orf23   | turquoise | -0.266234075 | 0.179496141 | TXNIP     | turquoise | -0.08805 | 0.66886  |
| AHSA2    | turquoise | -0.228   | 0.262612 | SSB       | turquoise | -0.265419143 | 0.180881868 | SNB01     | turquoise | -0.08789 | 0.669437 |
| NDUFA5   | turquoise | -0.22724 | 0.264256 | UBE2B     | turquoise | -0.265264065 | 0.181146409 | LLPH      | turquoise | -0.08751 | 0.670791 |
| SIRP     | turquoise | -0.22686 | 0.26507  | SLC4A8    | turquoise | -0.265258541 | 0.181155836 | SKP1      | turquoise | -0.08742 | 0.671099 |
| B3GALT6  | turquoise | -0.22647 | 0.265924 | ERBB2IP   | turquoise | -0.26477183  | 0.181987871 | TRAFD1    | turquoise | -0.08705 | 0.672427 |
| HARS2    | turquoise | -0.22616 | 0.266589 | MDM2      | turquoise | -0.264512359 | 0.182432524 | LOC72873C | turquoise | -0.08672 | 0.673569 |
| UBXN2B   | turquoise | -0.22602 | 0.266903 | STRAP     | turquoise | -0.264337002 | 0.182733459 | IRF2      | turquoise | -0.08637 | 0.67483  |
| CENPN    | turquoise | -0.22597 | 0.267013 | POLR2M    | turquoise | -0.264192519 | 0.182981669 | KLHL9     | turquoise | -0.08629 | 0.6751   |
| FOXO1    | turquoise | -0.22539 | 0.268265 | NTMT1     | turquoise | -0.263633148 | 0.184065615 | BTN3A3    | turquoise | -0.08616 | 0.675595 |
| DTWD1    | turquoise | -0.22538 | 0.26829  | UVELD     | turquoise | -0.263499494 | 0.184175492 | ERI1      | turquoise | -0.08615 | 0.675622 |
| THAP6    | turquoise | -0.22516 | 0.268758 | CGRRF1    | turquoise | -0.2627899   | 0.185403454 | RABEP1    | turquoise | -0.08603 | 0.676027 |
| SPRY2    | turquoise | -0.2249  | 0.269324 | BAD       | turquoise | -0.262763969 | 0.185448434 | NME4      | turquoise | -0.08581 | 0.676837 |
| LILRB1   | turquoise | 0.22473  | 0.269706 | USP53     | turquoise | -0.262667731 | 0.18561544  | MAPK7     | turquoise | -0.0858  | 0.676867 |
| COG5     | turquoise | -0.22451 | 0.270196 | FTSJ1     | turquoise | -0.26219303  | 0.186440734 | AIM1      | turquoise | -0.08541 | 0.67827  |
| VP526A   | turquoise | -0.22445 | 0.270313 | IFNAR1    | turquoise | -0.261382418 | 0.187855903 | AMZ1      | turquoise | -0.08504 | 0.679563 |
| LDHAL6B  | turquoise | 0.224346 | 0.270546 | WBP4      | turquoise | -0.260885114 | 0.188727771 | PIAS2     | turquoise | -0.08473 | 0.680673 |
| AK1      | turquoise | 0.224277 | 0.270699 | VRK2      | turquoise | -0.259059324 | 0.191952723 | PIR       | turquoise | -0.08456 | 0.681299 |
| TNIK     | turquoise | 0.223877 | 0.271577 | XPO1      | turquoise | -0.259010018 | 0.192040338 | MBD4      | turquoise | -0.08444 | 0.681731 |
| OIC1A1   | turquoise | -0.22374 | 0.271867 | FYB       | turquoise | -0.258966985 | 0.192116828 | PTBP2     | turquoise | -0.08442 | 0.681787 |
| RNF146   | turquoise | -0.22374 | 0.271888 | CEBPD     | turquoise | -0.258253701 | 0.19338774  | BICD2     | turquoise | -0.08428 | 0.682276 |
| NDUFAF1  | turquoise | -0.22259 | 0.274412 | HBS1L     | turquoise | -0.258028551 | 0.193790109 | KLHL7     | turquoise | -0.08401 | 0.683251 |
| RGS10    | turquoise | -0.2222  | 0.275286 | RGS19     | turquoise | -0.257966919 | 0.193900353 | RAB30     | turquoise | -0.08397 | 0.683405 |
| C17orf58 | turquoise | -0.22161 | 0.276577 | ARHGFE5   | turquoise | -0.25776632  | 0.19425947  | LAMTOR3   | turquoise | -0.0838  | 0.684022 |
| OSGEP11  | turquoise | -0.22157 | 0.276669 | LOC728377 | turquoise | -0.257573268 | 0.19460551  | SLC35A5   | turquoise | -0.08258 | 0.688381 |
| EMD      | turquoise | -0.22134 | 0.277197 | FOXK1     | turquoise | -0.257056268 | 0.195534306 | CNTLN     | turquoise | -0.08252 | 0.688588 |
| IQSEC2   | turquoise | -0.2211  | 0.277733 | NAP111    | turquoise | -0.256437633 | 0.196649691 | ZNF407    | turquoise | -0.0825  | 0.688669 |
| ZNF217   | turquoise | -0.22068 | 0.278662 | SSBP1     | turquoise | -0.256023403 | 0.197398979 | FES       | turquoise | -0.08239 | 0.689069 |
| ZNF788   | turquoise | -0.22055 | 0.278957 | SNX1      | turquoise | -0.255776574 | 0.19784639  | SF3B1L    | turquoise | -0.0822  | 0.689748 |

Table 6. Gene module membership and correlation with growth rate (48/72h), with adjusted p values for each module

|           |           |          |          |           |           |              |             |           |           |          |          |
|-----------|-----------|----------|----------|-----------|-----------|--------------|-------------|-----------|-----------|----------|----------|
| LMNA      | turquoise | 0.218887 | 0.282682 | LRRCC1    | turquoise | -0.25140298  | 0.205889801 | CAPN1     | turquoise | -0.07974 | 0.698592 |
| TESK1     | turquoise | -0.21873 | 0.283029 | LRP10     | turquoise | -0.251370443 | 0.205950462 | ROCK1     | turquoise | -0.07974 | 0.698595 |
| GNL2      | turquoise | -0.21855 | 0.28345  | EMR1      | turquoise | -0.251219266 | 0.206232472 | SLC25A43  | turquoise | -0.07956 | 0.699235 |
| DNAJC18   | turquoise | -0.21841 | 0.283748 | RAB11FIP2 | turquoise | -0.250241023 | 0.208063677 | CDC27     | turquoise | -0.07888 | 0.701685 |
| TRAK2     | turquoise | -0.21835 | 0.283898 | FAM173B   | turquoise | -0.249552834 | 0.209358529 | NUCB2     | turquoise | -0.07886 | 0.701786 |
| MRPL43    | turquoise | -0.2181  | 0.284459 | ADSL      | turquoise | -0.249337651 | 0.209764525 | MAN2C1    | turquoise | -0.07859 | 0.702752 |
| CCDC107   | turquoise | -0.21794 | 0.284815 | R3HDM2    | turquoise | -0.248924434 | 0.21054566  | TIMP3     | turquoise | -0.07853 | 0.702979 |
| DIAPH1    | turquoise | -0.21791 | 0.28488  | SF3A2     | turquoise | -0.248907399 | 0.210577906 | RNFT1     | turquoise | -0.07848 | 0.703136 |
| CENPW     | turquoise | -0.21783 | 0.28507  | DNAJC3    | turquoise | -0.248302449 | 0.211725165 | AZIN1     | turquoise | -0.07844 | 0.70328  |
| HERC29P   | turquoise | -0.21691 | 0.287163 | METT18    | turquoise | -0.247865629 | 0.212556205 | TAF9      | turquoise | -0.07832 | 0.703706 |
| NARG2     | turquoise | -0.21632 | 0.288516 | CENPC1    | turquoise | -0.246990745 | 0.214227292 | ST7       | turquoise | -0.0781  | 0.704512 |
| CENPB     | turquoise | -0.21611 | 0.288987 | UBE2W     | turquoise | -0.245919682 | 0.216285171 | KIAA0947  | turquoise | -0.07792 | 0.705186 |
| ORC6      | turquoise | -0.21589 | 0.289498 | VOPP1     | turquoise | -0.244270391 | 0.219480061 | RAP2B     | turquoise | -0.07791 | 0.705202 |
| TACC3     | turquoise | -0.21571 | 0.289908 | TMED4     | turquoise | -0.243996211 | 0.220014249 | PUS3      | turquoise | -0.07719 | 0.707819 |
| ZC3H3     | turquoise | -0.21565 | 0.290038 | GGPS1     | turquoise | -0.24344466  | 0.221091489 | ARL5A     | turquoise | -0.07716 | 0.707926 |
| FBP1      | turquoise | -0.21528 | 0.290884 | NUDT16    | turquoise | -0.243334072 | 0.221307907 | LOC643837 | turquoise | -0.0769  | 0.70887  |
| LRRRC40   | turquoise | -0.21498 | 0.291581 | SLC25A20  | turquoise | -0.242669124 | 0.222612191 | SLC4A7    | turquoise | -0.07622 | 0.711326 |
| TBL3      | turquoise | -0.21493 | 0.291681 | SLMO2     | turquoise | -0.24261318  | 0.22272216  | COIL      | turquoise | -0.07521 | 0.714987 |
| ZBTB25    | turquoise | -0.21472 | 0.292164 | SEC22A    | turquoise | -0.242098512 | 0.223735546 | ARFGEF1   | turquoise | -0.07513 | 0.715295 |
| RGP1      | turquoise | -0.21443 | 0.292835 | HSPB1     | turquoise | -0.242061194 | 0.223809147 | TNRC6C    | turquoise | -0.07498 | 0.71583  |
| SLC2A6    | turquoise | -0.21416 | 0.293474 | DPH2      | turquoise | -0.241734695 | 0.224453771 | MAP2K4    | turquoise | -0.07496 | 0.71591  |
| C3orf37   | turquoise | -0.21325 | 0.295563 | ACAP3     | turquoise | -0.24167119  | 0.224579295 | ZFYVE21   | turquoise | -0.07477 | 0.71661  |
| RFK       | turquoise | -0.2132  | 0.295675 | VPS35     | turquoise | -0.241444495 | 0.22502777  | ATG7      | turquoise | -0.07476 | 0.716639 |
| PPP2R3C   | turquoise | -0.21297 | 0.296228 | LFNG      | turquoise | -0.240662523 | 0.226579367 | NHLRC3    | turquoise | -0.07462 | 0.717126 |
| FES       | turquoise | -0.21267 | 0.296906 | RBM48     | turquoise | -0.240632336 | 0.226639407 | HSDL2     | turquoise | -0.07452 | 0.717504 |
| ABCC3     | turquoise | -0.21259 | 0.297094 | ZNF292    | turquoise | -0.240435838 | 0.227030492 | DNAJB4    | turquoise | -0.07427 | 0.71842  |
| PRPF6     | turquoise | -0.21244 | 0.297445 | GTF2H1    | turquoise | -0.240395052 | 0.227111726 | SLC25A36  | turquoise | -0.07389 | 0.719787 |
| PPP5K2    | turquoise | -0.21224 | 0.297918 | EXOC6     | turquoise | -0.240258828 | 0.227383179 | ICOS      | turquoise | -0.07381 | 0.72008  |
| MIR1307   | turquoise | 0.21218  | 0.298056 | RAD17     | turquoise | -0.240166462 | 0.22756736  | CLK1      | turquoise | -0.0737  | 0.720495 |
| AASDHPPT  | turquoise | -0.21189 | 0.298741 | AIP       | turquoise | -0.24014255  | 0.227615058 | KLHL15    | turquoise | -0.07363 | 0.720753 |
| SLC12A4   | turquoise | -0.21169 | 0.299195 | TESK1     | turquoise | -0.239887203 | 0.228124819 | TWISTNB   | turquoise | -0.07358 | 0.720924 |
| FAM221A   | turquoise | -0.21165 | 0.299304 | PLEKHM3   | turquoise | -0.239236758 | 0.229426779 | MINA      | turquoise | -0.07334 | 0.721797 |
| PSMA4     | turquoise | -0.21162 | 0.299369 | DTX4      | turquoise | -0.239104702 | 0.229691712 | ATP5A1    | turquoise | -0.07331 | 0.721895 |
| TRMT13    | turquoise | -0.21116 | 0.300435 | KIAA1522  | turquoise | -0.23799406  | 0.231927991 | EXOC6     | turquoise | -0.0732  | 0.722315 |
| RPL19     | turquoise | -0.21103 | 0.300734 | ZBED5     | turquoise | -0.237498827 | 0.232929803 | ERO1L     | turquoise | -0.07314 | 0.722541 |
| ZDHC20    | turquoise | -0.21041 | 0.302209 | MCM3AP    | turquoise | -0.237491065 | 0.232945527 | SEPS5C5   | turquoise | -0.07278 | 0.723837 |
| C11orf74  | turquoise | -0.21018 | 0.302732 | FOXO1     | turquoise | -0.237338837 | 0.233254063 | RAD50     | turquoise | -0.0721  | 0.726316 |
| GLYR1     | turquoise | -0.2099  | 0.30339  | IKBP1     | turquoise | -0.237255181 | 0.233423731 | SNX16     | turquoise | -0.07206 | 0.726461 |
| TYK2      | turquoise | -0.20966 | 0.303967 | FAM160B1  | turquoise | -0.23679822  | 0.234592887 | CCNL1     | turquoise | -0.07147 | 0.728638 |
| RBM48     | turquoise | -0.20929 | 0.304845 | TP53INP2  | turquoise | -0.235932969 | 0.236116323 | SLC25A16  | turquoise | -0.07125 | 0.729426 |
| TRIQK     | turquoise | -0.20897 | 0.305594 | RANBP3    | turquoise | -0.235103678 | 0.237815593 | ZDHHC4    | turquoise | -0.07119 | 0.729642 |
| MPV17L2   | turquoise | -0.20893 | 0.305696 | RHOF      | turquoise | -0.235023161 | 0.237981009 | SIGLEC11  | turquoise | -0.07084 | 0.730921 |
| IRF2BP2   | turquoise | -0.20863 | 0.306391 | ATXN1L    | turquoise | -0.234818843 | 0.238401103 | NUDT3     | turquoise | -0.07028 | 0.733002 |
| TMEM192   | turquoise | -0.20863 | 0.306411 | KDC13     | turquoise | -0.234180816 | 0.239716101 | APL       | turquoise | -0.07023 | 0.733181 |
| ZDHC16    | turquoise | -0.20836 | 0.307036 | ALKBH6    | turquoise | -0.233993395 | 0.240103293 | RHBD2     | turquoise | -0.06996 | 0.734161 |
| LOC388796 | turquoise | 0.208208 | 0.307404 | CD47      | turquoise | -0.233909009 | 0.240277761 | DCAF7     | turquoise | -0.06971 | 0.735067 |
| CHCHD10   | turquoise | -0.20812 | 0.307613 | ACADM     | turquoise | -0.233584405 | 0.240949659 | PP1B      | turquoise | -0.06949 | 0.735893 |
| CCDC25    | turquoise | -0.20801 | 0.307867 | ZNF441    | turquoise | -0.233128027 | 0.241896414 | HLTF      | turquoise | -0.06889 | 0.738097 |
| MCAT      | turquoise | -0.20792 | 0.308089 | COX11     | turquoise | -0.233035278 | 0.242089121 | RAB8B     | turquoise | -0.06883 | 0.738287 |
| SMIM7     | turquoise | -0.20764 | 0.308745 | ZNF516    | turquoise | -0.232816049 | 0.242545024 | CABLES2   | turquoise | -0.06883 | 0.738312 |
| LINC00674 | turquoise | -0.20757 | 0.308929 | KCTD9     | turquoise | -0.232706153 | 0.242773773 | SEPN1     | turquoise | -0.06879 | 0.738447 |
| BEX4      | turquoise | -0.20704 | 0.310186 | ESYT2     | turquoise | -0.232630866 | 0.242930565 | ALAD      | turquoise | -0.06854 | 0.73937  |
| ACOT8     | turquoise | -0.20683 | 0.310698 | NRAS      | turquoise | -0.231876148 | 0.24450603  | SMEK2     | turquoise | -0.0684  | 0.7399   |
| RANBP10   | turquoise | -0.20663 | 0.311157 | GPS2      | turquoise | -0.23166557  | 0.244946808 | AGTPBP1   | turquoise | -0.06838 | 0.739956 |
| RPL32     | turquoise | -0.20614 | 0.312331 | CPM       | turquoise | -0.231593863 | 0.245097024 | AP1G1     | turquoise | -0.06764 | 0.742665 |
| MAN2B1    | turquoise | -0.20608 | 0.312484 | KIAA0513  | turquoise | -0.230690523 | 0.246994573 | IFNGR1    | turquoise | -0.0675  | 0.743198 |
| ANKRA2    | turquoise | -0.20566 | 0.313498 | ATP6V1H   | turquoise | -0.230533215 | 0.247325999 | ASB13     | turquoise | -0.06748 | 0.74328  |
| FAM13B    | turquoise | -0.20544 | 0.31402  | SNX9      | turquoise | -0.229891907 | 0.248680162 | VGLL4     | turquoise | -0.06729 | 0.743947 |
| KIAA1586  | turquoise | -0.20507 | 0.314911 | CCP110    | turquoise | -0.229516325 | 0.249475484 | MTM1      | turquoise | -0.06718 | 0.744364 |
| CTSA      | turquoise | -0.20507 | 0.314915 | RARS      | turquoise | -0.229102075 | 0.250354618 | SLAMF6    | turquoise | -0.06714 | 0.744525 |
| NIP2A     | turquoise | -0.20505 | 0.314952 | DYNLL2    | turquoise | -0.229050892 | 0.250463382 | MLF1      | turquoise | -0.06637 | 0.747347 |
| RAB27A    | turquoise | -0.20456 | 0.316147 | SH3BP5L   | turquoise | -0.228531029 | 0.251569836 | PTOV1     | turquoise | -0.06622 | 0.7479   |
| GINM1     | turquoise | -0.20451 | 0.316268 | B4GALT2   | turquoise | -0.228145962 | 0.252391456 | CD84      | turquoise | -0.06618 | 0.748066 |
| DNAJC13   | turquoise | -0.20399 | 0.317522 | GALT      | turquoise | -0.228143019 | 0.252397743 | RECK      | turquoise | -0.06612 | 0.748288 |
| ASXL2     | turquoise | -0.20379 | 0.318008 | GPSM3     | turquoise | -0.227102882 | 0.254625891 | COP57B    | turquoise | -0.06606 | 0.748487 |
| CEP350    | turquoise | -0.2031  | 0.319688 | RP9       | turquoise | -0.226946629 | 0.254961715 | TMEM30A   | turquoise | -0.06599 | 0.748739 |
| SMARCAL1  | turquoise | -0.2028  | 0.320411 | PUS7L     | turquoise | -0.226784152 | 0.255311225 | UFSP2     | turquoise | -0.06585 | 0.749252 |
| CNEP1R1   | turquoise | -0.20271 | 0.320629 | BCL2      | turquoise | -0.226761845 | 0.255359235 | CCDC117   | turquoise | -0.06553 | 0.75044  |
| DHX40     | turquoise | -0.20236 | 0.321481 | CNOT2     | turquoise | -0.226516682 | 0.255887269 | RAB2A     | turquoise | -0.06547 | 0.750688 |
| FGD4      | turquoise | 0.202284 | 0.321676 | DOCK7     | turquoise | -0.225718458 | 0.257611417 | CEP152    | turquoise | -0.06462 | 0.753805 |
| RGCC      | turquoise | 0.201443 | 0.323735 | GNL2      | turquoise | -0.225080762 | 0.25899425  | CCDC25    | turquoise | -0.06408 | 0.755797 |
| CMC1      | turquoise | -0.20095 | 0.324955 | CENPW     | turquoise | -0.225008111 | 0.259152098 | C1GALT1C1 | turquoise | -0.06399 | 0.75613  |
| CNPB      | turquoise | -0.20094 | 0.324981 | COG8      | turquoise | -0.224671125 | 0.259885083 | FAM49B    | turquoise | -0.06389 | 0.756512 |
| HERC5     | turquoise | -0.20028 | 0.326599 | ILK       | turquoise | -0.224487972 | 0.260284026 | MAP3K5    | turquoise | -0.06366 | 0.757365 |
| RANBP17   | turquoise | -0.20027 | 0.32661  | SETX      | turquoise | -0.224215886 | 0.260877417 | IQGAP2    | turquoise | -0.06321 | 0.75902  |
| DHX32     | turquoise | -0.20023 | 0.326709 | TCAIM     | turquoise | -0.224105009 | 0.261119479 | CRAMP1L   | turquoise | -0.06303 | 0.759693 |
| MRP59     | turquoise | 0.199845 | 0.327669 | RASSF7    | turquoise | -0.22365623  | 0.262100725 | KDM4C     | turquoise | -0.0626  | 0.761286 |
| APLF      | turquoise | -0.19973 | 0.327959 | S1PR4     | turquoise | -0.223530767 | 0.262375474 | PPP6C     | turquoise | -0.06252 | 0.761594 |
| RAB28     | turquoise | -0.19918 | 0.329305 | IPOS      | turquoise | -0.222595057 | 0.264430457 | N4BP2L2   | turquoise | -0.06234 | 0.762242 |
| ZNF883    | turquoise | -0.19912 | 0.329453 | CAPZA2    | turquoise | -0.222239696 | 0.265213612 | VPS33A    | turquoise | -0.0623  | 0.762397 |
| KANSL3    | turquoise | -0.19904 | 0.329657 | BBS12     | turquoise | -0.221325948 | 0.267234235 | UTP18     | turquoise | -0.06223 | 0.762659 |
| AARS2     | turquoise | -0.19823 | 0.331669 | TANK      | turquoise | -0.221028405 | 0.267774468 | OMA1      | turquoise | -0.06208 | 0.7632   |
| LOC729737 | turquoise | -0.19786 | 0.332601 | HCFC1R1   | turquoise | -0.220395672 | 0.269301584 | FERM3T3   | turquoise | -0.06199 | 0.763554 |
| LOC374443 | turquoise | 0.19782  | 0.332695 | CYGB      | turquoise | -0.219353803 | 0.271629121 | TRIQK     | turquoise | -0.06194 | 0.763746 |
| CLYBL     | turquoise | -0.19741 | 0.333731 | LONRF1    | turquoise | -0.219078258 | 0.272246844 | SOGA1     | turquoise | -0.06184 | 0.764082 |
| ALG6      | turquoise | -0.19731 | 0.333967 | IRAK4     | turquoise | -0.218860681 | 0.27273525  | EV12A     | turquoise | -0.0618  | 0.764264 |
| COX11     | turquoise | -0.19712 | 0.334451 | CDC42     | turquoise | -0.218821761 | 0.272822674 | SLC12A7   | turquoise | -0.06166 | 0.76478  |
| NAF1      | turquoise | -0.1971  | 0.334486 | ZNF800    | turquoise | -0.218049161 | 0.274561868 | FAM98A    | turquoise | -0.06148 | 0.765443 |
| BCL10     | turquoise | -0.19681 | 0.335209 | HUS1      | turquoise | -0.217976466 | 0.274725876 | RAD1      | turquoise | -0.06145 | 0.765534 |
| HSF2      | turquoise | -0.19638 | 0.336308 | ODF2      | turquoise | -0.217305543 | 0.276242515 | COP3      | turquoise | -0.0614  | 0.765733 |
| TMEM191E  | turquoise | -0.19627 | 0.336568 | MAP4K5    | turquoise | -0.216952293 | 0.277043197 | PGM3      | turquoise | -0.06132 | 0.766017 |
| BLOC1S2   | turquoise | -0.19609 | 0.337032 | UBE2L6    | turquoise | -0.216460574 | 0.2781602   | FAM160B1  | turquoise | -0.06098 | 0.767294 |
| C9orf72   | turquoise | -0.19605 | 0.337133 | UCHL1     | turquoise | -0.215964068 |             |           |           |          |          |

Table 6. Gene module membership and correlation with growth rate (48/72h), with adjusted p values for each module

|           |           |          |          |          |           |              |             |            |           |          |          |
|-----------|-----------|----------|----------|----------|-----------|--------------|-------------|------------|-----------|----------|----------|
| ADCK2     | turquoise | -0.1936  | 0.343312 | TNNI2    | turquoise | -0.211072306 | 0.290588581 | DKFZP58614 | turquoise | -0.05887 | 0.775148 |
| PTGER2    | turquoise | -0.19356 | 0.343409 | TRPV2    | turquoise | -0.211047826 | 0.290645835 | DPY30      | turquoise | -0.05878 | 0.775459 |
| KLHL9     | turquoise | -0.1935  | 0.343564 | KIAA0368 | turquoise | -0.210934701 | 0.290910494 | NUPL1      | turquoise | -0.05877 | 0.77549  |
| VPS33A    | turquoise | -0.19342 | 0.343787 | NO2CL    | turquoise | -0.210798113 | 0.291232025 | C2orf18    | turquoise | -0.05873 | 0.775654 |
| SLC35E2B  | turquoise | -0.1928  | 0.345368 | TSEN15   | turquoise | -0.21074504  | 0.291354556 | PTGER4     | turquoise | -0.05859 | 0.77617  |
| POLD1     | turquoise | -0.1926  | 0.345859 | TCEAL8   | turquoise | -0.210216057 | 0.292595343 | MALAT1     | turquoise | -0.05855 | 0.776309 |
| API5      | turquoise | -0.19256 | 0.345965 | RMRP     | turquoise | -0.209794215 | 0.293587203 | MON1B      | turquoise | -0.05855 | 0.776317 |
| CDC42     | turquoise | -0.19233 | 0.346549 | SLC9A9   | turquoise | -0.208870151 | 0.295767303 | RWDD2A     | turquoise | -0.05853 | 0.776408 |
| LRP10     | turquoise | -0.1922  | 0.346877 | TBC1D15  | turquoise | -0.208553327 | 0.296517105 | TOP2B      | turquoise | -0.05813 | 0.777911 |
| WRN       | turquoise | -0.19218 | 0.346934 | CNND3    | turquoise | -0.208494416 | 0.296656657 | TACC3      | turquoise | -0.05721 | 0.781311 |
| CACYBP    | turquoise | -0.19213 | 0.347069 | MOB1B    | turquoise | -0.208451577 | 0.296758163 | UCHL5      | turquoise | -0.05694 | 0.782338 |
| DNAJB14   | turquoise | -0.19191 | 0.347619 | WDR44    | turquoise | -0.20793199  | 0.297991038 | RAB31P     | turquoise | -0.05662 | 0.783517 |
| GPAT2     | turquoise | -0.19174 | 0.348077 | KLF8     | turquoise | -0.20781792  | 0.298262436 | PRKAR2A    | turquoise | -0.05662 | 0.78353  |
| HS2ST1    | turquoise | -0.19158 | 0.348488 | RRP8     | turquoise | -0.206200624 | 0.302122362 | LRRCS8D    | turquoise | -0.0566  | 0.783616 |
| DENR      | turquoise | -0.19153 | 0.348606 | RUFY2    | turquoise | -0.20572635  | 0.303260266 | DYNC1L1    | turquoise | -0.05637 | 0.78445  |
| ITGB1     | turquoise | -0.19151 | 0.348646 | C18orf21 | turquoise | -0.204945393 | 0.305139798 | FADD       | turquoise | -0.05625 | 0.784926 |
| C1D       | turquoise | -0.19149 | 0.348702 | ZWILCH   | turquoise | -0.204047157 | 0.307310534 | DDX42      | turquoise | -0.0561  | 0.785477 |
| ZMI21     | turquoise | 0.191428 | 0.348866 | PLCL2    | turquoise | -0.203596403 | 0.308403462 | ZNF638     | turquoise | -0.05585 | 0.786385 |
| GOLGA7    | turquoise | -0.19126 | 0.349289 | LMBRD1   | turquoise | -0.20334004  | 0.30902613  | HSPA113    | turquoise | -0.0548  | 0.790325 |
| CLMN      | turquoise | -0.19037 | 0.351595 | LRPPRC   | turquoise | -0.203219362 | 0.309319512 | LRRCS5     | turquoise | -0.05478 | 0.790418 |
| FAM53C    | turquoise | 0.190275 | 0.351831 | PPM1F    | turquoise | -0.203176283 | 0.309424282 | SDAD1      | turquoise | -0.0547  | 0.790696 |
| C22orf32  | turquoise | -0.19016 | 0.352139 | GPC1     | turquoise | -0.203092083 | 0.309629124 | LRIF1      | turquoise | -0.0547  | 0.790698 |
| ABHD8     | turquoise | -0.19011 | 0.352257 | TMPO     | turquoise | -0.202769636 | 0.310414357 | FASN       | turquoise | -0.05465 | 0.790894 |
| ISOC2     | turquoise | -0.18995 | 0.352676 | SPATA7   | turquoise | -0.202332346 | 0.311481229 | HIVEP1     | turquoise | -0.05451 | 0.791408 |
| DENND6A   | turquoise | -0.18974 | 0.353216 | NOTCH1   | turquoise | -0.202232393 | 0.311725405 | CASP8AP2   | turquoise | -0.05451 | 0.791421 |
| GIPC1     | turquoise | 0.18973  | 0.353237 | KIAA1586 | turquoise | -0.202012766 | 0.312262351 | TRAPP6B    | turquoise | -0.05443 | 0.791731 |
| GLRX3     | turquoise | -0.18953 | 0.353748 | TRIM25   | turquoise | -0.201808881 | 0.312761322 | PER1       | turquoise | -0.05429 | 0.792223 |
| ABCE1     | turquoise | -0.18909 | 0.354889 | DCAF17   | turquoise | -0.200217897 | 0.316671878 | MTMR12     | turquoise | -0.05399 | 0.793369 |
| TCF19     | turquoise | -0.18909 | 0.354895 | AHR      | turquoise | -0.200130852 | 0.316888695 | USP8       | turquoise | -0.05397 | 0.793419 |
| CSRN1     | turquoise | -0.18907 | 0.354951 | AGXT2L2  | turquoise | -0.198866774 | 0.320016395 | TESK1      | turquoise | -0.05372 | 0.79437  |
| SBF1      | turquoise | -0.18888 | 0.355445 | LPGAT1   | turquoise | -0.198745299 | 0.320318158 | ZNF148     | turquoise | -0.05365 | 0.794617 |
| PRMT10    | turquoise | -0.18839 | 0.356703 | HMHA1    | turquoise | -0.198329225 | 0.321353027 | SNW1       | turquoise | -0.05362 | 0.794766 |
| PUF60     | turquoise | -0.18812 | 0.357423 | DNAJC13  | turquoise | -0.197497667 | 0.323427453 | RASA2      | turquoise | -0.05332 | 0.795866 |
| SMURF2    | turquoise | -0.18806 | 0.357566 | SLC35E2B | turquoise | -0.197432942 | 0.323589259 | CENPN      | turquoise | -0.05326 | 0.796105 |
| CXCR7     | turquoise | -0.18792 | 0.357926 | UBXN2B   | turquoise | -0.19690242  | 0.324917386 | TM2D1      | turquoise | -0.05313 | 0.796583 |
| ARL4C     | turquoise | -0.18747 | 0.3591   | SRD5A3   | turquoise | -0.195738781 | 0.327842119 | MCM3AP     | turquoise | -0.05297 | 0.797193 |
| KDEL2C    | turquoise | -0.18745 | 0.359171 | SNX33    | turquoise | -0.195269758 | 0.329025496 | FGL2       | turquoise | -0.05277 | 0.79794  |
| THOP1     | turquoise | -0.18744 | 0.359197 | ITFG1    | turquoise | -0.19489875  | 0.329963414 | BNIP2      | turquoise | -0.05224 | 0.799924 |
| C5orf51   | turquoise | -0.18742 | 0.359241 | RWDD1    | turquoise | -0.194580558 | 0.330769104 | FAM206A    | turquoise | -0.05206 | 0.800595 |
| HNRNP1A1  | turquoise | -0.1871  | 0.360079 | NCKIPSD  | turquoise | -0.194440648 | 0.331123747 | EGLN1      | turquoise | -0.0517  | 0.801963 |
| LIN7C     | turquoise | 0.186806 | 0.360843 | MAP7D1   | turquoise | -0.194099377 | 0.331989763 | FTSJ3      | turquoise | -0.05166 | 0.802087 |
| RNF168    | turquoise | -0.18656 | 0.361488 | GCC2     | turquoise | -0.193827066 | 0.332681769 | NMD3       | turquoise | -0.05129 | 0.803492 |
| HIPK2     | turquoise | 0.186243 | 0.362319 | ZSCAN18  | turquoise | -0.193801377 | 0.332747095 | SUZ12      | turquoise | -0.05117 | 0.803942 |
| SLC35A5   | turquoise | -0.18596 | 0.363062 | FAM199X  | turquoise | -0.193386537 | 0.333803108 | VP54B      | turquoise | -0.05106 | 0.804349 |
| NOL11     | turquoise | -0.18547 | 0.36435  | LRIF1    | turquoise | -0.192840727 | 0.33519556  | C4orf52    | turquoise | -0.05065 | 0.805891 |
| CD55      | turquoise | 0.185232 | 0.364977 | SCYL2    | turquoise | -0.19259446  | 0.335825033 | CLIC2      | turquoise | -0.04975 | 0.809287 |
| LAMTOR3   | turquoise | -0.18514 | 0.365227 | GNPAT    | turquoise | -0.192381057 | 0.336371047 | JMJD1C     | turquoise | -0.04954 | 0.810086 |
| MRC1      | turquoise | -0.18497 | 0.365661 | RBBP7    | turquoise | -0.192274726 | 0.336643308 | ADAMDEC1   | turquoise | -0.04945 | 0.810396 |
| E1F1B     | turquoise | 0.184938 | 0.365751 | PANK2    | turquoise | -0.191851437 | 0.33772845  | HCG26      | turquoise | -0.04945 | 0.810415 |
| SCARNA36  | turquoise | -0.18451 | 0.366876 | C6orf70  | turquoise | -0.191538469 | 0.33853213  | ISCU       | turquoise | -0.04878 | 0.812929 |
| ZNF331    | turquoise | -0.18401 | 0.368202 | SNRNP25  | turquoise | -0.191414292 | 0.338851327 | ABCC3      | turquoise | -0.04859 | 0.813669 |
| PEG10     | turquoise | -0.18383 | 0.368672 | RILP2    | turquoise | -0.191108385 | 0.339638433 | DHFR       | turquoise | -0.04843 | 0.814241 |
| TTC1      | turquoise | -0.18352 | 0.369505 | PHC3     | turquoise | -0.19107867  | 0.339714949 | CAAP1      | turquoise | -0.04818 | 0.815189 |
| PPP1R37   | turquoise | -0.18351 | 0.369532 | VAMP7    | turquoise | -0.190796139 | 0.340442982 | CCDC82     | turquoise | -0.04786 | 0.81642  |
| TRAPP5C   | turquoise | -0.1833  | 0.370083 | C9orf72  | turquoise | -0.19043093  | 0.341385451 | RGP1       | turquoise | -0.04785 | 0.816461 |
| LARS2     | turquoise | -0.1831  | 0.370608 | GPATCH2L | turquoise | -0.190180544 | 0.342032509 | NOP58      | turquoise | -0.04755 | 0.817573 |
| TARBP1    | turquoise | -0.18275 | 0.371539 | RAP2B    | turquoise | -0.189953592 | 0.342619646 | CASP4      | turquoise | -0.04738 | 0.818233 |
| STS       | turquoise | -0.18257 | 0.372039 | ACTR3    | turquoise | -0.189603185 | 0.34352735  | ARPC5      | turquoise | -0.04726 | 0.818656 |
| VRBPB     | turquoise | -0.18243 | 0.372408 | WDR61    | turquoise | -0.189571163 | 0.343610372 | NDUF84     | turquoise | -0.04709 | 0.819326 |
| MRP510    | turquoise | -0.18201 | 0.373521 | PPP6R1   | turquoise | -0.188467597 | 0.346478906 | ZDHHC5     | turquoise | -0.04694 | 0.819885 |
| RHOB      | turquoise | -0.18184 | 0.37399  | AP351    | turquoise | -0.188294136 | 0.346931084 | ZNF461     | turquoise | -0.04633 | 0.822199 |
| PPA1      | turquoise | -0.18182 | 0.37402  | ZFYVE27  | turquoise | -0.18773972  | 0.348378704 | RAB3GAP1   | turquoise | -0.04632 | 0.822212 |
| CAND1     | turquoise | -0.18162 | 0.374555 | COPB1    | turquoise | -0.187388658 | 0.349297212 | HOMER1     | turquoise | -0.04618 | 0.822761 |
| GTBPB10   | turquoise | -0.18107 | 0.376025 | C11orf80 | turquoise | -0.187278369 | 0.349586066 | AKAP10     | turquoise | -0.04564 | 0.824794 |
| SMKEK2    | turquoise | -0.18103 | 0.376138 | ECT2     | turquoise | -0.186810607 | 0.350812749 | ATG3       | turquoise | -0.04549 | 0.825342 |
| ASAP1     | turquoise | 0.180877 | 0.376555 | ARIH2    | turquoise | -0.186237623 | 0.352318852 | C6orf70    | turquoise | -0.04543 | 0.825594 |
| PPP4R2    | turquoise | -0.18088 | 0.376556 | TM75F3   | turquoise | -0.186042447 | 0.352832753 | ZNF213     | turquoise | -0.04517 | 0.826579 |
| CCDC14    | turquoise | -0.18066 | 0.377143 | OFD1     | turquoise | -0.185498205 | 0.3542661   | U2SURP     | turquoise | -0.04481 | 0.827924 |
| PSKH1     | turquoise | -0.18035 | 0.377969 | TAF2     | turquoise | -0.185449774 | 0.354395994 | GATAD2B    | turquoise | -0.04475 | 0.828168 |
| SLC4A8    | turquoise | -0.18033 | 0.378036 | TMEM116  | turquoise | -0.185439117 | 0.354424142 | ANKS1A     | turquoise | -0.04412 | 0.830525 |
| TBDB3     | turquoise | -0.18029 | 0.378124 | ZNF747   | turquoise | -0.185392418 | 0.354547495 | NDUFA4     | turquoise | -0.04399 | 0.831043 |
| TECR      | turquoise | -0.17984 | 0.379335 | PCGF3    | turquoise | -0.185318252 | 0.354743455 | PCM1       | turquoise | -0.04342 | 0.833192 |
| MOSP2D    | turquoise | -0.17965 | 0.379853 | CENPQ    | turquoise | -0.1852162   | 0.355013198 | COG7       | turquoise | -0.04308 | 0.834471 |
| EEF1B2    | turquoise | -0.17891 | 0.381866 | EFHA1    | turquoise | -0.184830136 | 0.356034742 | UAP1L1     | turquoise | -0.04293 | 0.835054 |
| GPM5M2    | turquoise | -0.17872 | 0.382378 | TOMM70A  | turquoise | -0.184739969 | 0.356273577 | ZXDB       | turquoise | -0.04284 | 0.835392 |
| BOLA3     | turquoise | -0.17854 | 0.382846 | APMAP    | turquoise | -0.184691592 | 0.356401759 | PHB        | turquoise | -0.04266 | 0.836071 |
| MFN1      | turquoise | -0.17848 | 0.38302  | SNHG16   | turquoise | -0.184632052 | 0.356559557 | PDLM2      | turquoise | -0.04214 | 0.838054 |
| SERPINF2  | turquoise | -0.17827 | 0.383593 | HERC2P9  | turquoise | -0.183226733 | 0.360296001 | TRNT1      | turquoise | -0.04177 | 0.839466 |
| LSG1      | turquoise | -0.178   | 0.384328 | HERF641  | turquoise | -0.182805069 | 0.361421599 | MAK16      | turquoise | -0.04148 | 0.840537 |
| MAN2B2    | turquoise | -0.17791 | 0.384568 | SMARCA2  | turquoise | -0.182752982 | 0.361560784 | IMPA1      | turquoise | -0.04129 | 0.841272 |
| PRKAG1    | turquoise | -0.17738 | 0.386013 | MICU1    | turquoise | -0.182510498 | 0.362209158 | PSMD12     | turquoise | -0.04123 | 0.841482 |
| NHP4      | turquoise | -0.17705 | 0.386912 | AGA      | turquoise | -0.182471323 | 0.362313972 | ZNF280C    | turquoise | -0.04101 | 0.842342 |
| NADK1     | turquoise | -0.17667 | 0.387931 | FAM8A1   | turquoise | -0.182292306 | 0.362793161 | MYSM1      | turquoise | -0.04099 | 0.842395 |
| POT1      | turquoise | -0.17623 | 0.38914  | YIPF2    | turquoise | -0.182270639 | 0.362851185 | ESF1       | turquoise | -0.04056 | 0.844025 |
| HELZ      | turquoise | -0.17606 | 0.389614 | MPHOSPH8 | turquoise | -0.181162786 | 0.365825223 | HNRNPR     | turquoise | -0.04037 | 0.844759 |
| ZNF692    | turquoise | -0.17583 | 0.390225 | E1F5     | turquoise | -0.17996317  | 0.369061641 | NRP1       | turquoise | -0.04011 | 0.845736 |
| UPK3BP1-F | turquoise | -0.17555 | 0.391016 | CTSA     | turquoise | -0.179444873 | 0.370465097 | UBQLN1     | turquoise | -0.03971 | 0.847254 |
| EFHA1     | turquoise | -0.17495 | 0.39265  | ROCK1    | turquoise | -0.179424933 | 0.370519154 | FMO4       | turquoise | -0.03958 | 0.847753 |
| CASP8AP2  | turquoise | -0.17486 | 0.392884 | MAP3K7   | turquoise | -0.179274121 | 0.370928144 | MAGOH      | turquoise | -0.03957 | 0.847797 |
| CYP20A1   | turquoise | -0.1746  | 0.393603 | IMPA1    | turquoise | -0.179028804 | 0.371593985 | ZFAND6     | turquoise | -0.03944 | 0.848288 |
| SUSD3     | turquoise | -0.17453 | 0.393803 | TRAF6    | turquoise | -0.178860525 | 0.372051134 | MAP4       | turquoise | -0.03883 | 0.850611 |
| ARL2BP    | turquoise | -0.17447 | 0.393974 | AIM2     | turquoise | -0.17879744  | 0.372222594 | SNX20      | turquoise | -0.03881 | 0.850706 |
| MEIS3P1   | turquoise | 0.17435  | 0.394301 | AUP1     | turquoise | -0.17869042  | 0.372513573 |            |           |          |          |

Table 6. Gene module membership and correlation with growth rate (48/72h), with adjusted p values for each module

|            |           |          |          |           |           |              |             |           |           |          |          |
|------------|-----------|----------|----------|-----------|-----------|--------------|-------------|-----------|-----------|----------|----------|
| SMNDC1     | turquoise | -0.17145 | 0.402335 | PHB       | turquoise | -0.175695426 | 0.380710256 | CHN2      | turquoise | -0.03759 | 0.855323 |
| CUX1       | turquoise | 0.171258 | 0.40287  | RNF41     | turquoise | -0.175389289 | 0.3815539   | CAMSAP2   | turquoise | -0.03759 | 0.855339 |
| LYRM5      | turquoise | -0.1706  | 0.404718 | PTOV1     | turquoise | -0.175053004 | 0.382481868 | RIF1      | turquoise | -0.03731 | 0.856393 |
| IFNAR2     | turquoise | -0.17047 | 0.405076 | QSOX2     | turquoise | -0.174486671 | 0.384047575 | INTS10    | turquoise | -0.03729 | 0.856465 |
| RSRC1      | turquoise | -0.17034 | 0.405425 | TTC7A     | turquoise | -0.173802822 | 0.385943069 | DDX50     | turquoise | -0.03719 | 0.856852 |
| PPP3CB     | turquoise | -0.17015 | 0.405974 | COG6      | turquoise | -0.173192273 | 0.387639913 | COX15     | turquoise | -0.03701 | 0.857568 |
| JC1005056i | turquoise | -0.17007 | 0.406194 | PRKAR2A   | turquoise | -0.173037347 | 0.388071162 | MAPK6     | turquoise | -0.03691 | 0.85794  |
| COG2       | turquoise | -0.16973 | 0.407142 | C9orf41   | turquoise | -0.172889725 | 0.388482334 | EIF253    | turquoise | -0.03663 | 0.859015 |
| RNU12      | turquoise | -0.16971 | 0.407188 | RCAN1     | turquoise | -0.172778027 | 0.388793614 | RGPD8     | turquoise | -0.03659 | 0.859135 |
| AKAP9      | turquoise | -0.16968 | 0.407292 | ATAD3B    | turquoise | -0.172341693 | 0.390010952 | ZNF248    | turquoise | -0.03654 | 0.859328 |
| PLA2G16    | turquoise | 0.169503 | 0.407779 | RAB11FIP4 | turquoise | -0.170833762 | 0.394234667 | STXBP1    | turquoise | -0.03641 | 0.859844 |
| PKRKR1     | turquoise | -0.16943 | 0.407978 | B3GALT6   | turquoise | -0.170741517 | 0.394493885 | FKBP5     | turquoise | -0.03604 | 0.861234 |
| PTPLAD1    | turquoise | -0.16943 | 0.407986 | RAB5A     | turquoise | -0.170514122 | 0.395133303 | TTIC4     | turquoise | -0.0357  | 0.86255  |
| IFNGR1     | turquoise | -0.16932 | 0.408294 | PDP2      | turquoise | -0.170029149 | 0.396498975 | NUDT16L1  | turquoise | -0.03554 | 0.863155 |
| UBXN4      | turquoise | -0.16891 | 0.409436 | SNX13     | turquoise | -0.169636187 | 0.397607502 | TRAM1     | turquoise | -0.03528 | 0.864158 |
| MEMO1      | turquoise | 0.168883 | 0.409523 | TSR1      | turquoise | -0.169389777 | 0.398303509 | CWF19L1   | turquoise | -0.03493 | 0.865488 |
| TTC28      | turquoise | 0.168507 | 0.41058  | CNC2      | turquoise | -0.16902175  | 0.399344312 | AKTIP     | turquoise | -0.03472 | 0.866282 |
| ALAS1      | turquoise | -0.16841 | 0.410841 | CUL3      | turquoise | -0.168384031 | 0.401151541 | MCCC2     | turquoise | -0.03422 | 0.8682   |
| CUL7       | turquoise | -0.16839 | 0.410921 | MVP       | turquoise | -0.168201715 | 0.401668937 | MTFR1     | turquoise | -0.0338  | 0.869793 |
| AGP5       | turquoise | -0.16829 | 0.411192 | THAP4     | turquoise | -0.167217003 | 0.404470432 | IQSEC3    | turquoise | -0.03376 | 0.869964 |
| NBPFF24    | turquoise | 0.168231 | 0.41136  | CRIP1     | turquoise | -0.167085811 | 0.404844496 | PPAT      | turquoise | -0.03364 | 0.87039  |
| CBX3       | turquoise | -0.16813 | 0.411653 | NMD3      | turquoise | -0.166785967 | 0.405700167 | GTPBP10   | turquoise | -0.03345 | 0.871145 |
| MED12      | turquoise | -0.16803 | 0.411914 | PUS10     | turquoise | -0.166566106 | 0.40632823  | ALKBH4    | turquoise | -0.03318 | 0.872159 |
| APPL2      | turquoise | -0.16803 | 0.411918 | C8orf40   | turquoise | -0.166290046 | 0.407117606 | FBXL4     | turquoise | -0.03203 | 0.876543 |
| STXBP5     | turquoise | 0.167893 | 0.412312 | WASF2     | turquoise | -0.165488255 | 0.409415136 | APOC2     | turquoise | -0.032   | 0.876661 |
| LIN37      | turquoise | 0.167511 | 0.413394 | NIT2      | turquoise | -0.165237845 | 0.410134165 | DNAJB14   | turquoise | -0.0319  | 0.877057 |
| ZC3H6      | turquoise | -0.16734 | 0.413873 | FAM60A    | turquoise | -0.164792692 | 0.411414121 | PCID2     | turquoise | -0.03171 | 0.877786 |
| USP40      | turquoise | -0.16734 | 0.413878 | PTPN4     | turquoise | -0.164777391 | 0.411458154 | C14orf166 | turquoise | -0.03147 | 0.8787   |
| UBXN11     | turquoise | 0.166814 | 0.415367 | TNFSF13B  | turquoise | -0.164703022 | 0.411672218 | DENND6A   | turquoise | -0.03127 | 0.879483 |
| FGR10P2    | turquoise | 0.166412 | 0.416509 | SMN2      | turquoise | -0.164250144 | 0.41297712  | FAM1881   | turquoise | -0.03126 | 0.879503 |
| SS18L1     | turquoise | 0.166195 | 0.417124 | ING2      | turquoise | -0.164182731 | 0.413171557 | CD276     | turquoise | -0.03111 | 0.880089 |
| ARL5A      | turquoise | -0.16608 | 0.417457 | CNBN11P1  | turquoise | -0.16406554  | 0.413509688 | EIF252    | turquoise | -0.03102 | 0.880417 |
| AHCYL2     | turquoise | -0.16601 | 0.417644 | API5      | turquoise | -0.163679843 | 0.414623622 | IMPAA2    | turquoise | -0.03096 | 0.880667 |
| PPIA       | turquoise | -0.166   | 0.417689 | OGFR1L    | turquoise | -0.163454255 | 0.415275917 | NLN       | turquoise | -0.03067 | 0.881771 |
| TRMT1L     | turquoise | -0.16599 | 0.417705 | UQCRC1    | turquoise | -0.163176528 | 0.416079754 | ACBD5     | turquoise | -0.0303  | 0.883168 |
| ARRDC4     | turquoise | -0.16587 | 0.418055 | SCAF8     | turquoise | -0.16295481  | 0.416722098 | ACVR1B    | turquoise | -0.02985 | 0.884925 |
| ATL2       | turquoise | -0.16584 | 0.418139 | DMTF1     | turquoise | -0.162953119 | 0.416726999 | COPS2     | turquoise | -0.02975 | 0.885304 |
| TAF1D      | turquoise | -0.16581 | 0.41823  | NMI       | turquoise | -0.161711985 | 0.420332869 | SF3B1     | turquoise | -0.02966 | 0.88563  |
| C3orf17    | turquoise | -0.16552 | 0.419057 | GINM1     | turquoise | -0.161287344 | 0.421570517 | FOPNL     | turquoise | -0.02952 | 0.886178 |
| HXB9       | turquoise | -0.16543 | 0.419305 | ZC3H4     | turquoise | -0.160409293 | 0.424136012 | TRMT1L    | turquoise | -0.02939 | 0.886675 |
| STIM2      | turquoise | -0.1653  | 0.41968  | BTN3A1    | turquoise | -0.160187308 | 0.424785966 | POLA2     | turquoise | -0.02921 | 0.887375 |
| TBC1D12    | turquoise | -0.16511 | 0.420219 | ZNF414    | turquoise | -0.159523091 | 0.426733988 | TMEM39A   | turquoise | -0.02914 | 0.887615 |
| TXND15     | turquoise | -0.16472 | 0.421323 | SOCS7     | turquoise | -0.159392284 | 0.427118196 | TBL3      | turquoise | -0.02905 | 0.887955 |
| CLK1       | turquoise | -0.16461 | 0.421656 | STIM2     | turquoise | -0.158700959 | 0.429151901 | RRP1      | turquoise | -0.02884 | 0.888759 |
| AZIN1      | turquoise | -0.16453 | 0.421874 | MRPS10    | turquoise | -0.15858707  | 0.42948744  | CINP      | turquoise | -0.02873 | 0.889199 |
| CEP57L1    | turquoise | -0.16449 | 0.421992 | TNHNIT6   | turquoise | -0.158536214 | 0.429637318 | RNF4      | turquoise | -0.02851 | 0.890035 |
| CUL5       | turquoise | -0.16423 | 0.42273  | ATAD3A    | turquoise | -0.157551653 | 0.432544531 | CSNK1E    | turquoise | -0.02828 | 0.89091  |
| MLKL       | turquoise | -0.16421 | 0.422795 | PWP2      | turquoise | -0.157518391 | 0.432642935 | TXNL1     | turquoise | -0.028   | 0.891986 |
| DHX8       | turquoise | 0.163989 | 0.423421 | ARPC4     | turquoise | -0.156548741 | 0.435516889 | JAK2      | turquoise | -0.02756 | 0.893693 |
| VPS45      | turquoise | -0.16389 | 0.423707 | RNF214    | turquoise | -0.156406987 | 0.435937898 | PPP2R5C   | turquoise | -0.02726 | 0.89482  |
| ZNF664     | turquoise | 0.163541 | 0.424705 | PRPF6     | turquoise | -0.155800827 | 0.437740677 | TWF1      | turquoise | -0.02711 | 0.895429 |
| ZNF518A    | turquoise | -0.16325 | 0.425553 | ECH1      | turquoise | -0.155362788 | 0.439045952 | PAAF1     | turquoise | -0.02705 | 0.895637 |
| NDFUFA4    | turquoise | -0.16315 | 0.425825 | NPL0C4    | turquoise | -0.155138538 | 0.439714985 | SS18L1    | turquoise | -0.02668 | 0.896591 |
| SLC7A7     | turquoise | -0.16312 | 0.425908 | IL1B      | turquoise | -0.154720889 | 0.440962473 | MRPL33    | turquoise | -0.02677 | 0.89671  |
| RPS11      | turquoise | -0.16308 | 0.426202 | CTNNB1P1  | turquoise | -0.153348945 | 0.445073733 | HECTD3    | turquoise | -0.02652 | 0.897666 |
| RNF71      | turquoise | -0.16299 | 0.426296 | POLG2     | turquoise | -0.15308915  | 0.445854557 | SLC45A3   | turquoise | -0.02633 | 0.898394 |
| NAA20      | turquoise | -0.16251 | 0.427667 | ZNF136    | turquoise | -0.152395661 | 0.447942443 | MLLT4     | turquoise | -0.02621 | 0.898869 |
| CD47       | turquoise | -0.16237 | 0.428086 | CHORDC1   | turquoise | -0.151979036 | 0.449199278 | Clorf50   | turquoise | -0.02619 | 0.898949 |
| BCAP29     | turquoise | -0.16225 | 0.428408 | ACE       | turquoise | -0.151930444 | 0.449345987 | CMTM7     | turquoise | -0.02603 | 0.899572 |
| SULT1A4    | turquoise | -0.16221 | 0.428551 | LTN1      | turquoise | -0.151868236 | 0.449533845 | PLEKHM1P  | turquoise | -0.02574 | 0.900665 |
| CALCOCO1   | turquoise | 0.1622   | 0.428566 | FAM63B    | turquoise | -0.151616097 | 0.450295685 | FKBP3     | turquoise | -0.02571 | 0.900782 |
| ABCC10     | turquoise | -0.16215 | 0.428723 | TXNIP     | turquoise | -0.151580419 | 0.450403541 | LRIG2     | turquoise | -0.02551 | 0.901562 |
| WHSC2      | turquoise | -0.16212 | 0.428811 | ZYX       | turquoise | -0.151373631 | 0.451028946 | SYNGR2    | turquoise | -0.02531 | 0.902337 |
| DEK        | turquoise | -0.16181 | 0.429691 | NAE1      | turquoise | -0.1508936   | 0.452482515 | HPS1      | turquoise | -0.02517 | 0.902871 |
| TBP        | turquoise | -0.16178 | 0.429792 | PI4K2B    | turquoise | -0.150555164 | 0.453508814 | TLN1      | turquoise | -0.0243  | 0.906186 |
| HLTF       | turquoise | -0.16162 | 0.430244 | APLF      | turquoise | -0.150332538 | 0.454184596 | PDCD7     | turquoise | -0.02415 | 0.906766 |
| KLHL7      | turquoise | -0.16114 | 0.431627 | CLIC4     | turquoise | -0.149843431 | 0.455671148 | DDHD1     | turquoise | -0.02409 | 0.907005 |
| PTPN18     | turquoise | -0.16107 | 0.431821 | EIF2B5    | turquoise | -0.149537179 | 0.456603252 | GNAI3     | turquoise | -0.02388 | 0.907826 |
| FURIN      | turquoise | -0.16104 | 0.431927 | MLF1      | turquoise | -0.149273792 | 0.457405696 | PRCC      | turquoise | -0.0238  | 0.908124 |
| GOSR2      | turquoise | -0.16074 | 0.432786 | CRNK1L    | turquoise | -0.149201917 | 0.457624802 | SNORA21   | turquoise | -0.02342 | 0.90957  |
| CEBPD      | turquoise | -0.16046 | 0.433608 | RYBP      | turquoise | -0.148697167 | 0.459165051 | YTHDF1    | turquoise | -0.02312 | 0.910733 |
| ELAC2      | turquoise | -0.16045 | 0.433631 | CDC50     | turquoise | -0.148278071 | 0.460445997 | NETO2     | turquoise | -0.02311 | 0.910764 |
| ARHGAP30   | turquoise | -0.16037 | 0.433875 | CIC       | turquoise | -0.147691989 | 0.462240467 | SNAPC1    | turquoise | -0.02303 | 0.911071 |
| KRCC1      | turquoise | -0.16003 | 0.434886 | TMEM126B  | turquoise | -0.146667583 | 0.465385777 | FMNL1     | turquoise | -0.02271 | 0.91233  |
| MINA       | turquoise | -0.15976 | 0.435648 | NR1H2     | turquoise | -0.146457888 | 0.466030994 | AK1       | turquoise | -0.02257 | 0.912853 |
| SCYL2      | turquoise | -0.15965 | 0.435955 | SCAF1     | turquoise | -0.146400145 | 0.466208746 | BCAR3     | turquoise | -0.02232 | 0.9138   |
| RAD50      | turquoise | -0.15961 | 0.436085 | SLC12A7   | turquoise | -0.146333674 | 0.466413411 | STX18     | turquoise | -0.02206 | 0.914831 |
| SRF        | turquoise | -0.1595  | 0.436393 | SMURF2    | turquoise | -0.145575691 | 0.468750543 | PHF72     | turquoise | -0.02184 | 0.91568  |
| RHEB       | turquoise | -0.15947 | 0.436475 | EDC4      | turquoise | -0.145489994 | 0.469015162 | CLINT1    | turquoise | -0.02179 | 0.915863 |
| ACER3      | turquoise | -0.15899 | 0.437884 | UAP111    | turquoise | -0.14508948  | 0.470252903 | FAM208B   | turquoise | -0.0213  | 0.917748 |
| C14orf93   | turquoise | -0.15874 | 0.438613 | ATAD2B    | turquoise | -0.145003684 | 0.470518266 | PTK2      | turquoise | -0.02119 | 0.91815  |
| NFKBIE     | turquoise | -0.15862 | 0.438953 | SMEK1     | turquoise | -0.144910106 | 0.470807786 | AHCYL2    | turquoise | -0.02108 | 0.918569 |
| SIGMAR1    | turquoise | -0.15845 | 0.439452 | TRPM7     | turquoise | -0.144405987 | 0.472369063 | EXOC7     | turquoise | -0.02033 | 0.921487 |
| STRAP      | turquoise | -0.15836 | 0.439712 | NOC3L     | turquoise | -0.144193627 | 0.473027552 | CCDC132   | turquoise | -0.02006 | 0.922509 |
| HMG20B     | turquoise | -0.15789 | 0.441111 | DEK       | turquoise | -0.143644559 | 0.474732301 | TOR1A     | turquoise | -0.01989 | 0.923158 |
| RHOQ       | turquoise | -0.15782 | 0.441307 | DENND4B   | turquoise | -0.143618713 | 0.474812627 | TMEM164   | turquoise | -0.01987 | 0.923256 |
| PAPSS1     | turquoise | -0.15777 | 0.441444 | XPR1      | turquoise | -0.142747662 | 0.477523787 | GGNBP2    | turquoise | -0.0181  | 0.930054 |
| BTN3A3     | turquoise | -0.1577  | 0.441654 | KD18      | turquoise | -0.142180722 | 0.47929266  | BCR       | turquoise | -0.0181  | 0.93006  |
| ZFYVE27    | turquoise | 0.15763  | 0.441859 | TBRG4     | turquoise | -0.14203471  | 0.479748763 | POLG2     | turquoise | -0.01791 | 0.930803 |
| E1F3E      | turquoise | -0.15753 | 0.442153 | HERC1     | turquoise | -0.141742072 | 0.480663561 | ACVR2A    | turquoise | -0.0178  | 0.931209 |
| LPGAT1     | turquoise | -0.15751 | 0.442226 | SPOPL     | turquoise | -0.141332515 | 0.481945345 | SDHAF2    | turquoise | -0.01777 | 0.931347 |
| CHKA       | turquoise | 0.157402 | 0.442528 | CCDC71L   | turquoise | -0.141314913 | 0.482000474 | RCN2      | turquoise | -0.01748 | 0.932464 |
| PUS7       | turquoise | -0.15735 | 0.442692 | FBXO30    | turquoise | -0.140994741 | 0.483003785 | CAP       |           |          |          |

Table 6. Gene module membership and correlation with growth rate (48/72h), with adjusted p values for each module

|          |           |          |          |          |           |              |             |           |           |          |          |
|----------|-----------|----------|----------|----------|-----------|--------------|-------------|-----------|-----------|----------|----------|
| EOGT     | turquoise | 0.155452 | 0.448272 | AKAP9    | turquoise | -0.137238834 | 0.494852555 | TM95F3    | turquoise | -0.01376 | 0.946794 |
| C18orf21 | turquoise | -0.15544 | 0.44831  | FAM111A  | turquoise | -0.13624628  | 0.498007925 | STK3      | turquoise | -0.01347 | 0.947938 |
| ME1      | turquoise | -0.15528 | 0.448773 | ZNF280C  | turquoise | -0.136127045 | 0.498387653 | N6AMT1    | turquoise | -0.01342 | 0.948116 |
| EXOC1    | turquoise | -0.15504 | 0.449496 | TRIOBP   | turquoise | -0.136102573 | 0.498465605 | MFS08     | turquoise | -0.01299 | 0.949783 |
| C1orf43  | turquoise | -0.15499 | 0.44964  | IGBP1    | turquoise | -0.136054949 | 0.498617327 | RPL23AP82 | turquoise | -0.01278 | 0.950608 |
| DROSHA   | turquoise | -0.15497 | 0.449707 | METTL21D | turquoise | -0.135751105 | 0.499585854 | RPRD1A    | turquoise | -0.01266 | 0.951057 |
| KIAA1107 | turquoise | -0.15477 | 0.450291 | GNAI2    | turquoise | -0.135717862 | 0.499691875 | GPD1      | turquoise | -0.01264 | 0.951121 |
| PRAM1    | turquoise | -0.15447 | 0.451192 | PCCB     | turquoise | -0.135642779 | 0.499931377 | CCDC88B   | turquoise | -0.01221 | 0.952798 |
| KDEL3    | turquoise | -0.15443 | 0.45129  | NCOA5    | turquoise | -0.135433201 | 0.5006002   | ARRDC1    | turquoise | -0.01203 | 0.9535   |
| DDX50    | turquoise | -0.15433 | 0.451593 | NOC4L    | turquoise | -0.135088    | 0.501702806 | EBAG9     | turquoise | -0.01169 | 0.9548   |
| PDXK     | turquoise | -0.15428 | 0.451759 | FASTK    | turquoise | -0.135076805 | 0.501738582 | CLYBL     | turquoise | -0.01139 | 0.955959 |
| RRAGB    | turquoise | -0.15421 | 0.451965 | GUF1     | turquoise | -0.134922498 | 0.502231863 | EMILIN2   | turquoise | -0.01088 | 0.957916 |
| TIPARP   | turquoise | -0.15419 | 0.452023 | DLG4     | turquoise | -0.13469364  | 0.502963904 | ELMOD2    | turquoise | -0.01001 | 0.96131  |
| PLCB3    | turquoise | 0.153992 | 0.452599 | MAZ      | turquoise | -0.134570618 | 0.503357628 | SNRPC     | turquoise | -0.00999 | 0.961381 |
| EGLN1    | turquoise | -0.1534  | 0.454365 | ADSS     | turquoise | -0.134384262 | 0.503954341 | NDRG3     | turquoise | -0.00969 | 0.962527 |
| CCNC     | turquoise | -0.15317 | 0.455053 | HDAC2    | turquoise | -0.134041945 | 0.505051356 | C7orf29   | turquoise | -0.00958 | 0.962935 |
| EIF252   | turquoise | -0.15284 | 0.456031 | SLCO2B1  | turquoise | -0.133868384 | 0.505608009 | MAML1     | turquoise | -0.00912 | 0.96475  |
| EHF      | turquoise | -0.15228 | 0.457691 | BCKDHB   | turquoise | -0.133784039 | 0.505878637 | CER5E     | turquoise | -0.00898 | 0.965286 |
| MRPS15   | turquoise | -0.15208 | 0.458304 | ELP4     | turquoise | -0.13374369  | 0.506008123 | HDAC3     | turquoise | -0.0088  | 0.965983 |
| KIAA1551 | turquoise | -0.1519  | 0.458825 | AGAP3    | turquoise | -0.133708994 | 0.506119483 | INO80C    | turquoise | -0.00829 | 0.967924 |
| PHAX     | turquoise | -0.15159 | 0.459779 | SGOL2    | turquoise | -0.133559215 | 0.506600349 | PPP6R1    | turquoise | -0.00816 | 0.968427 |
| MRLP47   | turquoise | -0.15149 | 0.460065 | HIST1H4B | turquoise | -0.133534333 | 0.507261379 | LACE1     | turquoise | -0.00815 | 0.968478 |
| RNF20    | turquoise | -0.15146 | 0.460148 | DRG2     | turquoise | -0.133270987 | 0.507526336 | ATAD3B    | turquoise | -0.00813 | 0.968546 |
| PFAS     | turquoise | -0.15104 | 0.461424 | VDAC2    | turquoise | -0.133000723 | 0.508395372 | E2F6      | turquoise | -0.0075  | 0.970987 |
| OGFR1    | turquoise | -0.15094 | 0.461718 | NDRG3    | turquoise | -0.132899924 | 0.508719678 | CHKA      | turquoise | -0.0075  | 0.970993 |
| FAM70B   | turquoise | -0.15086 | 0.461954 | TAF9     | turquoise | -0.132672904 | 0.509450455 | ADAT1     | turquoise | -0.00724 | 0.971985 |
| GTF2H3   | turquoise | -0.15049 | 0.463079 | TRMT11   | turquoise | -0.13197149  | 0.511711558 | EIF4E     | turquoise | -0.00693 | 0.973196 |
| TRIP4    | turquoise | -0.15041 | 0.4633   | CEP70    | turquoise | -0.131911172 | 0.511906231 | EEF1E1    | turquoise | -0.00691 | 0.973265 |
| MAP15    | turquoise | -0.15019 | 0.46396  | CCDC82   | turquoise | -0.131208433 | 0.514176944 | ZYX       | turquoise | -0.00666 | 0.974236 |
| ZNF569   | turquoise | -0.15008 | 0.464288 | SFPQ     | turquoise | -0.131015871 | 0.514800015 | GALNT7    | turquoise | -0.00659 | 0.974527 |
| PIK3R1   | turquoise | -0.14999 | 0.464562 | FAM200B  | turquoise | -0.13099192  | 0.514877538 | SUZ12P1   | turquoise | -0.00615 | 0.976213 |
| PYGL     | turquoise | -0.14996 | 0.464653 | NCOA1    | turquoise | -0.13070425  | 0.515809101 | CNOT7     | turquoise | -0.00605 | 0.976605 |
| RARS     | turquoise | -0.14957 | 0.465837 | TSNAX    | turquoise | -0.130504786 | 0.516455508 | ARHGAP21  | turquoise | -0.00583 | 0.977456 |
| GNPDA1   | turquoise | -0.14945 | 0.466199 | MRPS33   | turquoise | -0.129865437 | 0.518530112 | ARID4A    | turquoise | -0.00566 | 0.978121 |
| ZDHHC8   | turquoise | -0.14882 | 0.468112 | ARLSA    | turquoise | -0.12985451  | 0.518565603 | ER12      | turquoise | -0.0048  | 0.981419 |
| HERC6    | turquoise | -0.14879 | 0.468181 | RASA2    | turquoise | -0.12937147  | 0.520135733 | NPHP4     | turquoise | -0.00475 | 0.981642 |
| SNX14    | turquoise | -0.14868 | 0.46854  | FAM3A    | turquoise | -0.12921848  | 0.520633507 | GMIP      | turquoise | -0.00469 | 0.981877 |
| TNFRSF14 | turquoise | -0.14862 | 0.468699 | GNPDA1   | turquoise | -0.128536629 | 0.522854805 | GPR107    | turquoise | -0.00464 | 0.982065 |
| N4BP2L2  | turquoise | -0.14854 | 0.468945 | TPM4     | turquoise | -0.128147232 | 0.524125408 | C14orf101 | turquoise | -0.00462 | 0.98212  |
| TOMM70A  | turquoise | -0.14852 | 0.468995 | GSN      | turquoise | -0.128067168 | 0.524386841 | PTPN2     | turquoise | -0.00453 | 0.982484 |
| RPLP0    | turquoise | -0.14838 | 0.469421 | TRAF3IP2 | turquoise | -0.127527002 | 0.526152282 | XRCC4     | turquoise | -0.00444 | 0.98283  |
| AP351    | turquoise | -0.14826 | 0.469805 | PIN1     | turquoise | -0.127478358 | 0.526311408 | TBK1      | turquoise | -0.00425 | 0.983565 |
| GSN      | turquoise | -0.14824 | 0.469848 | DNAJC2   | turquoise | -0.127178302 | 0.527293463 | RBM22     | turquoise | -0.00402 | 0.984452 |
| CNTRL    | turquoise | 0.148167 | 0.470079 | PIGF     | turquoise | -0.127067818 | 0.527655285 | ZNF268    | turquoise | -0.00391 | 0.984881 |
| SYNE3    | turquoise | -0.14816 | 0.470106 | GGA2     | turquoise | -0.126920001 | 0.528139558 | ZC3H13    | turquoise | -0.00381 | 0.985246 |
| DHRS1    | turquoise | -0.14802 | 0.470523 | POR      | turquoise | -0.126636271 | 0.529069699 | COPS5     | turquoise | -0.00379 | 0.985334 |
| JUNB     | turquoise | -0.14794 | 0.470759 | NUDT16L1 | turquoise | -0.126469716 | 0.529616072 | WRNP1     | turquoise | -0.00357 | 0.986171 |
| MAPK6    | turquoise | 0.147269 | 0.472803 | RNF138   | turquoise | -0.126148784 | 0.530669631 | SLC25A32  | turquoise | -0.00338 | 0.986938 |
| JDP2     | turquoise | -0.14704 | 0.47349  | NHLRC3   | turquoise | -0.125794291 | 0.53183452  | MGAT4A    | turquoise | -0.00333 | 0.987132 |
| VGLL4    | turquoise | -0.14693 | 0.473849 | ADPRH    | turquoise | -0.125291618 | 0.533488425 | VADP      | turquoise | -0.00313 | 0.987902 |
| C14orf2  | turquoise | -0.14671 | 0.474509 | COP54    | turquoise | -0.125250753 | 0.533622986 | NDUFV2    | turquoise | -0.00295 | 0.988582 |
| DTX4     | turquoise | -0.14664 | 0.474727 | ATP11C   | turquoise | -0.12509206  | 0.534145688 | SIPA1L2   | turquoise | -0.00208 | 0.991963 |
| PHF13    | turquoise | -0.1466  | 0.474843 | CCNG1    | turquoise | -0.12473856  | 0.53531092  | HMG20B    | turquoise | -0.00174 | 0.993278 |
| EEF1E1   | turquoise | -0.14613 | 0.476278 | EZH1     | turquoise | -0.124732346 | 0.535331411 | KATNA1    | turquoise | -0.00135 | 0.994791 |
| PTPLAD2  | turquoise | -0.14601 | 0.476652 | C6orf62  | turquoise | -0.123944608 | 0.53793237  | MTIF3     | turquoise | -0.00117 | 0.995461 |
| TRANK1   | turquoise | -0.1459  | 0.476971 | CASP8AP2 | turquoise | -0.123859908 | 0.538212387 | LGMN      | turquoise | -0.00056 | 0.997831 |
| COMMD8   | turquoise | -0.14577 | 0.477373 | CASP6    | turquoise | -0.123397345 | 0.539742824 | LMBRD2    | turquoise | -0.00041 | 0.998406 |
| B9D2     | turquoise | -0.14573 | 0.477487 | CLDN23   | turquoise | -0.122912321 | 0.541349768 | MINPP1    | turquoise | 0.00016  | 0.999382 |
| SLC35B3  | turquoise | -0.14567 | 0.477688 | PFKP     | turquoise | -0.122255444 | 0.54352965  | AHCY      | turquoise | 0.000194 | 0.999248 |
| H0XA1    | turquoise | -0.14564 | 0.477753 | YY1      | turquoise | -0.122028975 | 0.544282148 | CES2      | turquoise | 0.000259 | 0.998998 |
| BBS4     | turquoise | -0.14544 | 0.478386 | DTD2     | turquoise | -0.121986985 | 0.544421723 | NARG2     | turquoise | 0.000287 | 0.99889  |
| SLC35A2  | turquoise | -0.14542 | 0.478432 | HIF1A    | turquoise | -0.121792449 | 0.545068583 | CYP51A1   | turquoise | 0.000505 | 0.998046 |
| QPRT     | turquoise | -0.14533 | 0.478716 | TRAPP6B  | turquoise | -0.120861553 | 0.548168886 | UBE2S     | turquoise | 0.000852 | 0.996704 |
| NAA16    | turquoise | -0.14533 | 0.478726 | IRF2     | turquoise | -0.120704049 | 0.548694251 | TUBGCP3   | turquoise | 0.001075 | 0.99584  |
| PITPN1   | turquoise | -0.14533 | 0.478729 | EMILIN2  | turquoise | -0.12004011  | 0.550911434 | TMEM59    | turquoise | 0.001351 | 0.994774 |
| PKNOX1   | turquoise | 0.145218 | 0.479058 | RNF171   | turquoise | -0.119118354 | 0.553996416 | BBS4      | turquoise | 0.0018   | 0.993037 |
| NCBP2    | turquoise | -0.14515 | 0.479268 | OSGEP1   | turquoise | -0.119012641 | 0.554350728 | SLC35B3   | turquoise | 0.001958 | 0.992425 |
| KIAO0319 | turquoise | 0.145051 | 0.479571 | BT3      | turquoise | -0.118936036 | 0.554607547 | SRSF1     | turquoise | 0.002045 | 0.99209  |
| TTC3     | turquoise | -0.14496 | 0.479851 | HNRNPAL1 | turquoise | -0.118805063 | 0.55504676  | CSNK2A1   | turquoise | 0.002132 | 0.991754 |
| TMEM106C | turquoise | -0.14491 | 0.480007 | NR2C1    | turquoise | -0.118511546 | 0.556031635 | HEATR3    | turquoise | 0.002796 | 0.989185 |
| SAP130   | turquoise | -0.14483 | 0.480236 | VDAC3    | turquoise | -0.11800453  | 0.557734776 | SLC38A7   | turquoise | 0.002895 | 0.988801 |
| NEU3     | turquoise | 0.144656 | 0.480778 | CLN5     | turquoise | -0.117553718 | 0.559251117 | AP4E1     | turquoise | 0.003057 | 0.988174 |
| C1orf198 | turquoise | -0.14466 | 0.480781 | USM65    | turquoise | -0.117064933 | 0.560897304 | ZFAND4    | turquoise | 0.003085 | 0.988068 |
| ZDHHC4   | turquoise | -0.14446 | 0.481385 | CDK2AP1  | turquoise | -0.116735379 | 0.562008454 | TCF20     | turquoise | 0.003721 | 0.985607 |
| YEATS2   | turquoise | -0.14407 | 0.482583 | TNIP1    | turquoise | -0.116347446 | 0.563317715 | TIMP2     | turquoise | 0.004233 | 0.983627 |
| RAB42    | turquoise | -0.14378 | 0.483474 | UBR4     | turquoise | -0.116346423 | 0.563321171 | CUL4B     | turquoise | 0.0043   | 0.983368 |
| STAM     | turquoise | -0.14363 | 0.48392  | CTNND1   | turquoise | -0.116047827 | 0.564329864 | CAMK2G    | turquoise | 0.004355 | 0.983155 |
| CCDC112  | turquoise | -0.1436  | 0.484014 | RHOBTB3  | turquoise | -0.11570431  | 0.565491317 | UNC119    | turquoise | 0.005056 | 0.980445 |
| GRN      | turquoise | 0.143533 | 0.484228 | SNHG6    | turquoise | -0.115674659 | 0.565591619 | TMED7     | turquoise | 0.005232 | 0.979763 |
| MORC4    | turquoise | -0.14341 | 0.484595 | LOC50643 | turquoise | -0.115581059 | 0.5659083   | SFMBT2    | turquoise | 0.005284 | 0.979564 |
| YIPF2    | turquoise | -0.14336 | 0.484764 | SLC25A43 | turquoise | -0.115519727 | 0.566115849 | SMCHD1    | turquoise | 0.005606 | 0.978317 |
| ZMYM2    | turquoise | -0.143   | 0.485876 | SNHG4    | turquoise | -0.115420965 | 0.566450134 | AIFM1     | turquoise | 0.005614 | 0.978286 |
| EMC2     | turquoise | -0.14229 | 0.488061 | CXCL16   | turquoise | -0.11458234  | 0.569292256 | NBEAL1    | turquoise | 0.005736 | 0.977812 |
| ADAMT56  | turquoise | 0.142079 | 0.488712 | PSMA6    | turquoise | -0.114574876 | 0.569317579 | ZFYVE16   | turquoise | 0.006851 | 0.973504 |
| ZFAND6   | turquoise | -0.1416  | 0.490207 | ZNF548   | turquoise | -0.114566721 | 0.569345247 | NUDT21    | turquoise | 0.007029 | 0.972814 |
| CCDC159  | turquoise | 0.141515 | 0.490456 | KDEL2C   | turquoise | -0.114256175 | 0.57039936  | TTC30A    | turquoise | 0.007269 | 0.971885 |
| UCHL5    | turquoise | -0.14108 | 0.49181  | LRC8D    | turquoise | -0.11407664  | 0.571009167 | LRP10     | turquoise | 0.007373 | 0.971486 |
| DGDK     | turquoise | 0.140876 | 0.492437 | RAD23A   | turquoise | -0.114012555 | 0.571226906 | LILRA6    | turquoise | 0.007516 | 0.970932 |
| DYRK1A   | turquoise | -0.14075 | 0.492827 | LYST     | turquoise | -0.11370933  | 0.572257677 | FBXL20    | turquoise | 0.007744 | 0.970051 |
| UBE2B    | turquoise | -0.14062 | 0.493227 | ZZEF1    | turquoise | -0.11308189  | 0.574393194 | NIPAL2    | turquoise | 0.007873 | 0.969552 |
| ADI1     | turquoise | -0.14053 | 0.493516 | PGAM5    | turquoise | -0.112847914 | 0.575190448 | TMEM62    | turquoise | 0.008221 | 0.968206 |
| C6orf48  | turquoise | -0.14012 | 0.49479  | CAP2B    | turquoise | -0.112707129 | 0.575670393 | ANKRD27   | turquoise | 0.008753 | 0.966151 |
| EAF2     | turquoise | -0.14007 | 0.494948 | SMEK2    | turquoise | -0.112       |             |           |           |          |          |

Table 6. Gene module membership and correlation with growth rate (48/72h), with adjusted p values for each module

|          |           |          |          |           |           |              |             |                 |           |          |          |
|----------|-----------|----------|----------|-----------|-----------|--------------|-------------|-----------------|-----------|----------|----------|
| ATP2C1   | turquoise | -0.13748 | 0.503042 | PMM2      | turquoise | -0.109311184 | 0.587300857 | CCDC146         | turquoise | 0.012255 | 0.952619 |
| ITGAX    | turquoise | 0.137396 | 0.503295 | GLMN      | turquoise | -0.109187288 | 0.587727099 | RCHY1           | turquoise | 0.012509 | 0.951641 |
| TBCX     | turquoise | -0.13692 | 0.504797 | CLTB      | turquoise | -0.109175636 | 0.587767193 | CCDC85C         | turquoise | 0.012523 | 0.951585 |
| OPHN1    | turquoise | 0.136791 | 0.505194 | TXNDC15   | turquoise | -0.1091695   | 0.587788306 | ZNF498          | turquoise | 0.012623 | 0.951199 |
| ZMI22    | turquoise | -0.13642 | 0.506366 | ANKX11    | turquoise | -0.109103955 | 0.588013869 | ZBTB28          | turquoise | 0.012774 | 0.950615 |
| TSR1     | turquoise | -0.13631 | 0.506719 | PTGER4    | turquoise | -0.109003639 | 0.58835916  | SGSM3           | turquoise | 0.012774 | 0.950614 |
| TPM4     | turquoise | -0.13572 | 0.508568 | HAT1      | turquoise | -0.108607625 | 0.589723111 | HBP1            | turquoise | 0.012796 | 0.95053  |
| NDNL2    | turquoise | -0.13559 | 0.508985 | LRRC40    | turquoise | -0.108308061 | 0.590755778 | TNFRSF1B        | turquoise | 0.013341 | 0.948426 |
| GPSM3    | turquoise | -0.13524 | 0.510066 | CT6A      | turquoise | -0.10824865  | 0.590960676 | KLF16           | turquoise | 0.013477 | 0.947902 |
| NSUN3    | turquoise | -0.1352  | 0.510221 | ATP9A     | turquoise | -0.107929629 | 0.592061436 | ATN1            | turquoise | 0.013537 | 0.947669 |
| FXR1     | turquoise | -0.13499 | 0.510883 | ARL28P    | turquoise | -0.107599846 | 0.593200259 | SIRT3           | turquoise | 0.013749 | 0.946852 |
| DPH2     | turquoise | -0.13464 | 0.511991 | LRRCS8    | turquoise | -0.107044054 | 0.595121673 | HRA5            | turquoise | 0.014198 | 0.945117 |
| ZFP106   | turquoise | -0.13444 | 0.512595 | MIER2     | turquoise | -0.106675179 | 0.596398374 | PPAP2A          | turquoise | 0.014267 | 0.944851 |
| CWF19L2  | turquoise | -0.13424 | 0.513256 | SNORD94   | turquoise | -0.106637466 | 0.596528965 | FMNL2           | turquoise | 0.01436  | 0.944493 |
| CDKN3    | turquoise | -0.1341  | 0.513686 | RECK      | turquoise | -0.10623796  | 0.59791313  | FAM172A         | turquoise | 0.014755 | 0.942969 |
| FHOD1    | turquoise | -0.13409 | 0.513717 | KITLG     | turquoise | -0.106184781 | 0.598097481 | UBE2D1          | turquoise | 0.015003 | 0.94201  |
| CR2L2    | turquoise | 0.134032 | 0.513901 | FAM188A   | turquoise | -0.10572353  | 0.599697483 | MOSPDI1         | turquoise | 0.01528  | 0.940942 |
| ACACA    | turquoise | -0.13393 | 0.514234 | MLL7      | turquoise | -0.105316603 | 0.60111055  | RCAN1           | turquoise | 0.015336 | 0.940725 |
| ACP6     | turquoise | -0.13372 | 0.514898 | KRAS      | turquoise | -0.105127978 | 0.601766032 | GTF3C6          | turquoise | 0.015869 | 0.938668 |
| FAM178A  | turquoise | -0.13368 | 0.515027 | DMXL1     | turquoise | -0.104751033 | 0.603076849 | CMPK1           | turquoise | 0.016246 | 0.937217 |
| NFYB     | turquoise | -0.13335 | 0.516066 | PBX3      | turquoise | -0.104345722 | 0.604487648 | DBT             | turquoise | 0.016588 | 0.935896 |
| CHORDC1  | turquoise | 0.133167 | 0.516645 | PVR       | turquoise | -0.104060192 | 0.60548235  | NUP98           | turquoise | 0.017465 | 0.932516 |
| COPB1    | turquoise | -0.13298 | 0.517255 | PDCD7     | turquoise | -0.103712697 | 0.606693849 | MTOR            | turquoise | 0.017911 | 0.930794 |
| HNRNPM   | turquoise | -0.13281 | 0.517785 | DTWD1     | turquoise | -0.103665371 | 0.606858923 | POLR1C          | turquoise | 0.018285 | 0.929353 |
| SGOL2    | turquoise | -0.13279 | 0.517829 | GLUPR2    | turquoise | -0.103369631 | 0.607890901 | DNAJ2           | turquoise | 0.018291 | 0.92933  |
| RNMT     | turquoise | -0.13277 | 0.517924 | PPP1CB    | turquoise | -0.103255995 | 0.608287628 | FKTN            | turquoise | 0.018312 | 0.929249 |
| LPP      | turquoise | -0.13275 | 0.517984 | RAB28     | turquoise | -0.103111574 | 0.608791986 | PPG5            | turquoise | 0.018572 | 0.928248 |
| FOPNL    | turquoise | -0.13258 | 0.518504 | MRPL16    | turquoise | -0.102808695 | 0.609850288 | SAFB2           | turquoise | 0.018599 | 0.928144 |
| LRIF1    | turquoise | 0.13159  | 0.52167  | IL28RA    | turquoise | -0.10254784  | 0.610762367 | HSPA9           | turquoise | 0.018603 | 0.928131 |
| EIF3H    | turquoise | -0.13156 | 0.521759 | LYRM7     | turquoise | -0.101860749 | 0.613167496 | MAP4K4          | turquoise | 0.018659 | 0.927913 |
| MAN1C1   | turquoise | -0.13082 | 0.524142 | CIAPIN1   | turquoise | -0.101350293 | 0.614956858 | ABHD14B         | turquoise | 0.018907 | 0.926956 |
| H3BGR3L3 | turquoise | -0.13038 | 0.525546 | MYCBP2    | turquoise | -0.101274682 | 0.61522209  | TTYH3           | turquoise | 0.018972 | 0.926705 |
| XPR1     | turquoise | 0.130151 | 0.52627  | ABCE1     | turquoise | -0.100776624 | 0.616970373 | KDM3A           | turquoise | 0.019174 | 0.92593  |
| GM2A     | turquoise | -0.13013 | 0.526352 | PTBP2     | turquoise | -0.100702622 | 0.61723031  | ANKH            | turquoise | 0.019427 | 0.924954 |
| MCM4     | turquoise | -0.12995 | 0.526928 | P2RX4     | turquoise | -0.100466051 | 0.618061582 | GTF2I           | turquoise | 0.019441 | 0.924899 |
| DLG4     | turquoise | 0.12977  | 0.527492 | B3GAT3    | turquoise | -0.100424037 | 0.618209263 | AKT3            | turquoise | 0.019478 | 0.924757 |
| ASH1L    | turquoise | 0.12955  | 0.528198 | ACER3     | turquoise | -0.100163325 | 0.619125983 | STK4            | turquoise | 0.020136 | 0.922221 |
| CQP      | turquoise | -0.12938 | 0.528754 | TOP2B     | turquoise | -0.100154736 | 0.619156191 | ZNF791          | turquoise | 0.020378 | 0.92129  |
| MKI67    | turquoise | -0.12937 | 0.528789 | TMED7     | turquoise | -0.100065006 | 0.619471839 | PCYT2           | turquoise | 0.020544 | 0.920651 |
| PSMG1    | turquoise | -0.12879 | 0.530627 | NAF1      | turquoise | -0.099619464 | 0.621040108 | PACS2           | turquoise | 0.020803 | 0.919656 |
| MRPL30   | turquoise | -0.12873 | 0.530837 | AIM1      | turquoise | -0.099578579 | 0.621184101 | RRP15           | turquoise | 0.020958 | 0.91906  |
| FKTN     | turquoise | -0.1286  | 0.531241 | AP4E1     | turquoise | -0.099234775 | 0.622395481 | CARS2           | turquoise | 0.021595 | 0.916607 |
| SDAD1    | turquoise | -0.12858 | 0.531314 | C20orf194 | turquoise | -0.098907526 | 0.623549425 | SOX13           | turquoise | 0.022219 | 0.914203 |
| SPOPL    | turquoise | -0.12856 | 0.531379 | TMEM41B   | turquoise | -0.098544189 | 0.624831634 | DPH2            | turquoise | 0.022472 | 0.913233 |
| ENDOD1   | turquoise | -0.12837 | 0.53198  | PTAFR     | turquoise | -0.098355008 | 0.625499674 | STAM2           | turquoise | 0.02249  | 0.913163 |
| ATP5A1   | turquoise | -0.12829 | 0.532267 | GPR77     | turquoise | -0.09758672  | 0.626215635 | GPR89C          | turquoise | 0.023151 | 0.910621 |
| PIIB     | turquoise | -0.12826 | 0.532337 | LY96      | turquoise | -0.097462476 | 0.628655292 | FBXO33          | turquoise | 0.023277 | 0.910134 |
| RHOE     | turquoise | -0.12812 | 0.532804 | SFR1      | turquoise | -0.097123751 | 0.629854554 | SLC6A12         | turquoise | 0.023433 | 0.909536 |
| SETX     | turquoise | -0.12812 | 0.532805 | GOLGA7B   | turquoise | -0.097087468 | 0.629983067 | FRA10A2         | turquoise | 0.023906 | 0.907717 |
| C20orf94 | turquoise | -0.1279  | 0.533505 | SSH3      | turquoise | -0.096923821 | 0.630562839 | MIR1            | turquoise | 0.024232 | 0.906463 |
| ZSCAN21  | turquoise | 0.127832 | 0.533728 | BB55      | turquoise | -0.096842781 | 0.630850027 | WDR82           | turquoise | 0.024493 | 0.905459 |
| CNKK5    | turquoise | 0.127651 | 0.534313 | MFN1      | turquoise | -0.096695314 | 0.631372751 | MYBBP1A         | turquoise | 0.024603 | 0.905038 |
| ARHGAP32 | turquoise | 0.127482 | 0.534859 | APOB8     | turquoise | -0.096337252 | 0.632642694 | ERO1LB          | turquoise | 0.024706 | 0.904641 |
| KPNA3    | turquoise | -0.12746 | 0.534917 | RBM34     | turquoise | -0.095946749 | 0.634028855 | HIBCH           | turquoise | 0.024733 | 0.904539 |
| ADNP     | turquoise | -0.12743 | 0.535012 | EPG5      | turquoise | -0.095942525 | 0.634043855 | PFKP            | turquoise | 0.024864 | 0.904036 |
| STPG1    | turquoise | -0.12741 | 0.535101 | POLR2B    | turquoise | -0.095851289 | 0.634367891 | PEL1            | turquoise | 0.025259 | 0.902519 |
| ATP6V1B2 | turquoise | -0.12727 | 0.535544 | PGM1      | turquoise | -0.095821715 | 0.634472938 | KIAA2026        | turquoise | 0.025357 | 0.902142 |
| ACBD5    | turquoise | -0.12724 | 0.535634 | GBAS      | turquoise | -0.095634936 | 0.635136556 | TX2P1-UPK3BP1-F | turquoise | 0.025465 | 0.901727 |
| GMPS     | turquoise | -0.12688 | 0.536815 | PTPRM     | turquoise | -0.095492584 | 0.635642511 | GOLPH3L         | turquoise | 0.026662 | 0.89713  |
| UBR3     | turquoise | 0.12668  | 0.537455 | SNX14     | turquoise | -0.095485683 | 0.635667044 | CCDC97          | turquoise | 0.026936 | 0.89608  |
| NIN1     | turquoise | 0.125923 | 0.539906 | ACVR2A    | turquoise | -0.094733943 | 0.638341596 | CEP104          | turquoise | 0.026987 | 0.895883 |
| RXRA     | turquoise | -0.12576 | 0.540425 | PPA2      | turquoise | -0.094640028 | 0.638676042 | AMFR            | turquoise | 0.027097 | 0.895461 |
| ARID4A   | turquoise | -0.12575 | 0.54047  | FPG5      | turquoise | -0.094494716 | 0.639193653 | GTPBP6          | turquoise | 0.027375 | 0.894395 |
| ATHL1    | turquoise | -0.12567 | 0.540724 | SGSM3     | turquoise | -0.094266032 | 0.640008577 | CYTH3           | turquoise | 0.027638 | 0.893384 |
| EPB41L4A | turquoise | -0.12545 | 0.541446 | NMB       | turquoise | -0.093849931 | 0.641492409 | UBA3            | turquoise | 0.027732 | 0.893027 |
| DCAF13   | turquoise | -0.12534 | 0.541802 | EXOC7     | turquoise | -0.093840328 | 0.641526671 | TFDP2           | turquoise | 0.027937 | 0.89224  |
| COTL1    | turquoise | -0.1252  | 0.542257 | ZNF229    | turquoise | -0.093536644 | 0.642610494 | IFNAR2          | turquoise | 0.0282   | 0.891232 |
| GDNBP2   | turquoise | -0.12479 | 0.54359  | MBP       | turquoise | -0.093254333 | 0.643618323 | GRWD1           | turquoise | 0.028526 | 0.889979 |
| CDKN2B   | turquoise | -0.12472 | 0.543815 | USP5      | turquoise | -0.093007654 | 0.644500121 | PRPF39          | turquoise | 0.028607 | 0.889671 |
| C11orf73 | turquoise | -0.12452 | 0.54446  | TTIC17    | turquoise | -0.092954011 | 0.644691859 | DNAAF2          | turquoise | 0.029476 | 0.88634  |
| KHSRP    | turquoise | -0.12426 | 0.545313 | C9orf123  | turquoise | -0.092951919 | 0.644699339 | TMX1            | turquoise | 0.029864 | 0.884852 |
| B4GALT2  | turquoise | -0.12411 | 0.545793 | LMF2      | turquoise | -0.092847332 | 0.645073239 | SLC26A2         | turquoise | 0.029886 | 0.88477  |
| CCDC132  | turquoise | -0.12376 | 0.546944 | PICALM    | turquoise | -0.092792062 | 0.645270865 | SSH3            | turquoise | 0.030068 | 0.884073 |
| STX16    | turquoise | -0.1235  | 0.547808 | RAB27A    | turquoise | -0.092747362 | 0.645430713 | TMED3           | turquoise | 0.030514 | 0.882363 |
| DAP3     | turquoise | -0.12347 | 0.54791  | CABLES2   | turquoise | -0.092449684 | 0.646495607 | KIN             | turquoise | 0.030793 | 0.881297 |
| MYO7B    | turquoise | -0.12343 | 0.548023 | OCTAD1    | turquoise | -0.092446434 | 0.646507235 | DYNLT3          | turquoise | 0.03093  | 0.880771 |
| PARP11   | turquoise | -0.12343 | 0.548037 | FAM45A    | turquoise | -0.091891617 | 0.648493829 | DHR53           | turquoise | 0.031598 | 0.878217 |
| LRRC34   | turquoise | -0.12288 | 0.54982  | PTPLAD2   | turquoise | -0.09183595  | 0.654624322 | KDM5A           | turquoise | 0.032023 | 0.876587 |
| SKIL     | turquoise | -0.12284 | 0.549937 | TSSC1     | turquoise | -0.09123629  | 0.654839955 | FBXL18          | turquoise | 0.032642 | 0.874224 |
| KRAS     | turquoise | -0.12261 | 0.550698 | FOXO4     | turquoise | -0.090075718 | 0.655012258 | FOXN3           | turquoise | 0.033024 | 0.872762 |
| TAF12    | turquoise | -0.1225  | 0.551076 | TIMP2     | turquoise | -0.089958906 | 0.655432425 | JM1D8           | turquoise | 0.033158 | 0.87225  |
| HERC1    | turquoise | 0.122243 | 0.551909 | SMPDL3A   | turquoise | -0.089667382 | 0.656481464 | ZNF280D         | turquoise | 0.033197 | 0.872102 |
| RPL37A   | turquoise | 0.122232 | 0.551946 | ACTR10    | turquoise | -0.088943514 | 0.659089032 | IQCB1           | turquoise | 0.033807 | 0.869771 |
| FOXN3    | turquoise | 0.122089 | 0.552415 | ITGAE     | turquoise | -0.088744422 | 0.659806898 | ST14            | turquoise | 0.03395  | 0.869222 |
| RPAIN    | turquoise | -0.12199 | 0.55274  | ERICH1    | turquoise | -0.088618553 | 0.660260895 | STBD1           | turquoise | 0.033954 | 0.869209 |
| TRAM1    | turquoise | -0.12199 | 0.552751 | SEPN1     | turquoise | -0.088549374 | 0.660510469 | PIAS1           | turquoise | 0.033974 | 0.869132 |
| GBP5     | turquoise | -0.12183 | 0.553259 | TMEM68    | turquoise | -0.088157527 | 0.661924775 | LXN             | turquoise | 0.034263 | 0.868028 |
| NCB2     | turquoise | -0.12178 | 0.55343  | TNIP3     | turquoise | -0.087855409 | 0.663015993 | TEF             | turquoise | 0.034431 | 0.867386 |
| STK10    | turquoise | -0.12174 | 0.553552 | ANO10     | turquoise | -0.087545025 | 0.664137771 | DBR1            | turquoise | 0.034949 | 0.865408 |
| TMA16    | turquoise | -0.12111 | 0.555632 | BPTF      | turquoise | -0.087516606 | 0.664240515 | PDCD2L          | turquoise | 0.035041 | 0.865059 |
| RSPRY1   | turquoise | -0.12055 | 0.557464 | GNB5      | turquoise | -0.087293033 | 0.665049027 | MANBAL          | turquoise | 0.035326 | 0.863969 |
| MSL2     | turquoise | -0.12049 | 0.557663 | ANKRA2    | turquoise | -0.087267251 | 0.665142285 | HERC1           | turquoise | 0.035418 | 0.86362  |
| H3PXD2A  | turquoise | -0.12015 | 0.55879  | FOPNL     | turquoise | -0.087126917 | 0.665649993 | RABGAP1L        | turquoise | 0.036782 | 0.858419 |

Table 6. Gene module membership and correlation with growth rate (48/72h), with adjusted p values for each module

|          |           |          |          |          |           |              |             |          |           |          |          |
|----------|-----------|----------|----------|----------|-----------|--------------|-------------|----------|-----------|----------|----------|
| ERGIC2   | turquoise | -0.11935 | 0.561418 | ATG16L2  | turquoise | -0.085623702 | 0.671097366 | SWI5     | turquoise | 0.039594 | 0.847713 |
| DDX47    | turquoise | -0.11923 | 0.561838 | BCL2L1   | turquoise | -0.085550478 | 0.671363137 | HNRPL    | turquoise | 0.040081 | 0.845863 |
| ME3      | turquoise | 0.119205 | 0.56191  | AMPD2    | turquoise | -0.085290634 | 0.672306555 | RPS15    | turquoise | 0.04015  | 0.845601 |
| PRPF40A  | turquoise | -0.11914 | 0.562121 | SLC35A5  | turquoise | -0.084988415 | 0.673404435 | C7orf60  | turquoise | 0.040155 | 0.845581 |
| GOLPH3   | turquoise | -0.1191  | 0.562243 | CSorf28  | turquoise | -0.084854464 | 0.673891254 | NUCB1    | turquoise | 0.040553 | 0.844068 |
| THYN1    | turquoise | -0.11877 | 0.563346 | RB1      | turquoise | -0.084787621 | 0.674134227 | SDHAF1   | turquoise | 0.040685 | 0.843568 |
| XCCL11   | turquoise | -0.11867 | 0.563665 | KRCC1    | turquoise | -0.084783495 | 0.674149228 | ATF5     | turquoise | 0.040904 | 0.842734 |
| RFX1     | turquoise | 0.118558 | 0.564048 | ROGDI    | turquoise | -0.084661366 | 0.674593255 | ZFP30    | turquoise | 0.041203 | 0.841602 |
| UBE2M    | turquoise | -0.11849 | 0.564287 | CUL5     | turquoise | -0.084363788 | 0.675675606 | SARS2    | turquoise | 0.041266 | 0.84136  |
| PDE2A    | turquoise | 0.118331 | 0.564799 | DTWD2    | turquoise | -0.08391444  | 0.677311172 | TAF1A    | turquoise | 0.041496 | 0.840489 |
| WASH5P   | turquoise | -0.11829 | 0.564939 | ACBD6    | turquoise | -0.08378418  | 0.677785569 | ALG6     | turquoise | 0.041499 | 0.840478 |
| SPATA7   | turquoise | -0.1182  | 0.565233 | GAPVD1   | turquoise | -0.083643455 | 0.678298212 | SMC5     | turquoise | 0.042004 | 0.838559 |
| CCT3     | turquoise | -0.11789 | 0.566246 | TOE1     | turquoise | -0.082796629 | 0.681386038 | SAP30L   | turquoise | 0.042158 | 0.837977 |
| WIPF1    | turquoise | -0.11789 | 0.566255 | SUZ12    | turquoise | -0.082162782 | 0.683700555 | CLEC12A  | turquoise | 0.04339  | 0.833306 |
| ITPK8    | turquoise | -0.1177  | 0.566882 | CBX4     | turquoise | -0.082134564 | 0.683803661 | ACTN1    | turquoise | 0.043838 | 0.831609 |
| RASA2    | turquoise | -0.11751 | 0.56752  | TGFB1    | turquoise | -0.081991502 | 0.684326471 | CIAPIN1  | turquoise | 0.044006 | 0.830973 |
| SNURF    | turquoise | -0.11749 | 0.567592 | NELF     | turquoise | -0.081594154 | 0.68579298  | NCK1     | turquoise | 0.044147 | 0.830437 |
| TNIP3    | turquoise | -0.11729 | 0.568263 | DENND6A  | turquoise | -0.081427663 | 0.686388364 | ATG10    | turquoise | 0.044377 | 0.829566 |
| VDAC2    | turquoise | -0.1172  | 0.568541 | XRCC4    | turquoise | -0.081347174 | 0.686682886 | ACIN1    | turquoise | 0.044806 | 0.827945 |
| TRAPPC6B | turquoise | -0.11698 | 0.569291 | PITPNA   | turquoise | -0.081340566 | 0.686707067 | SLC15A3  | turquoise | 0.04482  | 0.827892 |
| MTA3     | turquoise | -0.11691 | 0.56953  | WBP1L    | turquoise | -0.081261223 | 0.686997437 | ANKRA2   | turquoise | 0.045178 | 0.826538 |
| LATS2    | turquoise | -0.11676 | 0.57002  | EXOC1    | turquoise | -0.081161216 | 0.687363495 | STK36    | turquoise | 0.045192 | 0.826484 |
| NF282    | turquoise | -0.11664 | 0.570411 | ENSA     | turquoise | -0.080849255 | 0.688505819 | ZMYM5    | turquoise | 0.045331 | 0.825957 |
| CLEC12A  | turquoise | -0.11646 | 0.571024 | PGD      | turquoise | -0.080746935 | 0.688880633 | TSPLY5   | turquoise | 0.04546  | 0.825469 |
| TNFAIP2  | turquoise | 0.116408 | 0.571185 | NZF202   | turquoise | -0.080712002 | 0.689008616 | MCPH1    | turquoise | 0.04565  | 0.824752 |
| ZCHC16   | turquoise | 0.116279 | 0.571617 | PGRMC2   | turquoise | -0.08063646  | 0.689285403 | CDC42BPA | turquoise | 0.04635  | 0.822106 |
| H3F3B    | turquoise | 0.115484 | 0.574266 | RELB     | turquoise | -0.08063402  | 0.689294342 | CMTM6    | turquoise | 0.047128 | 0.81917  |
| KATNB1L  | turquoise | -0.11547 | 0.574324 | SHOC2    | turquoise | -0.080520487 | 0.689710404 | BDP1     | turquoise | 0.048256 | 0.814912 |
| GRHRP    | turquoise | -0.1154  | 0.574538 | CSorf51  | turquoise | -0.080465737 | 0.689911077 | FGR      | turquoise | 0.049558 | 0.810009 |
| C1orf50  | turquoise | -0.11522 | 0.575138 | FTSJ1    | turquoise | -0.080291322 | 0.690550488 | PIGK     | turquoise | 0.050001 | 0.808341 |
| SAMD9    | turquoise | -0.11484 | 0.576412 | ZFP106   | turquoise | -0.080232207 | 0.690767253 | LARS     | turquoise | 0.050142 | 0.80781  |
| PSPC1    | turquoise | 0.11482  | 0.576484 | NSUN4    | turquoise | -0.079172715 | 0.69465625  | DHX38    | turquoise | 0.050875 | 0.805052 |
| BAHD1    | turquoise | 0.114796 | 0.576563 | RABS8    | turquoise | -0.079116348 | 0.694863362 | CORO7    | turquoise | 0.051188 | 0.803875 |
| MPAIP1   | turquoise | 0.114775 | 0.576633 | TXN      | turquoise | -0.079030949 | 0.695177194 | RTTN     | turquoise | 0.051441 | 0.802926 |
| DKR1B    | turquoise | -0.1147  | 0.576876 | CCDC88B  | turquoise | -0.078976163 | 0.695378552 | FAM118B  | turquoise | 0.051663 | 0.802089 |
| NXF3     | turquoise | -0.11453 | 0.577468 | ANKRD50  | turquoise | -0.078550535 | 0.696943566 | TAMM41   | turquoise | 0.051814 | 0.801523 |
| DIS3     | turquoise | -0.11351 | 0.580882 | IFNGR1   | turquoise | -0.078186887 | 0.698281642 | CCT8     | turquoise | 0.052385 | 0.799379 |
| MRPS27   | turquoise | -0.11322 | 0.581834 | GLCE     | turquoise | -0.077851745 | 0.699515609 | SUMF1    | turquoise | 0.052814 | 0.797769 |
| MIER1    | turquoise | -0.11316 | 0.582031 | GMPS     | turquoise | -0.077629434 | 0.700334552 | RPE      | turquoise | 0.053009 | 0.797038 |
| EIF4E2   | turquoise | -0.11304 | 0.58246  | ITGAX    | turquoise | -0.077595585 | 0.700459274 | TRIM28   | turquoise | 0.05329  | 0.795984 |
| SHPRH    | turquoise | 0.112494 | 0.584282 | NIPSNAP1 | turquoise | -0.077572212 | 0.700545398 | ADNP2    | turquoise | 0.053566 | 0.794952 |
| SBN02    | turquoise | 0.11233  | 0.584833 | NCDN     | turquoise | -0.077333794 | 0.701424127 | CNTRL    | turquoise | 0.053971 | 0.793433 |
| GAA      | turquoise | 0.112297 | 0.584944 | CPVL     | turquoise | -0.076650029 | 0.703946339 | TAZ      | turquoise | 0.05411  | 0.792913 |
| CINP     | turquoise | -0.11226 | 0.58506  | CENPB    | turquoise | -0.076182511 | 0.705672638 | NUDCD2   | turquoise | 0.054534 | 0.791324 |
| CAPNS1   | turquoise | -0.112   | 0.585938 | SLC2A13  | turquoise | -0.076128777 | 0.705871141 | S100A10  | turquoise | 0.054962 | 0.789723 |
| ODF3B    | turquoise | -0.11174 | 0.586825 | CLMN     | turquoise | -0.076030055 | 0.706235889 | EZF3     | turquoise | 0.055374 | 0.788183 |
| ORC2     | turquoise | -0.11139 | 0.588012 | PIGV     | turquoise | -0.075870718 | 0.706824719 | ANKRD50  | turquoise | 0.055434 | 0.787958 |
| SLC19A3  | turquoise | -0.11138 | 0.58802  | VP55A    | turquoise | -0.07538731  | 0.708612168 | GADD45A  | turquoise | 0.055682 | 0.78703  |
| UBXN1    | turquoise | -0.11132 | 0.588242 | PTGER2   | turquoise | -0.075273826 | 0.709032006 | DLAT     | turquoise | 0.055834 | 0.786463 |
| ADAT1    | turquoise | -0.11126 | 0.588446 | CTNNA1   | turquoise | -0.074955616 | 0.710209675 | LMNA     | turquoise | 0.055942 | 0.786058 |
| STX18    | turquoise | -0.11113 | 0.588891 | FEM1C    | turquoise | -0.074498645 | 0.711902018 | ATP13A1  | turquoise | 0.056021 | 0.785762 |
| RP2      | turquoise | 0.111086 | 0.589025 | INO80E   | turquoise | -0.07422613  | 0.712911889 | DNAI1    | turquoise | 0.056802 | 0.782845 |
| FAM63B   | turquoise | -0.11089 | 0.589677 | IZUSURP  | turquoise | -0.074002114 | 0.713742384 | KIAA1429 | turquoise | 0.056887 | 0.782529 |
| HNRPDL   | turquoise | -0.11087 | 0.589741 | ATG4A    | turquoise | -0.073958099 | 0.7139056   | HDAC4    | turquoise | 0.056927 | 0.782378 |
| TMEM59   | turquoise | -0.11087 | 0.589762 | DDX47    | turquoise | -0.073885242 | 0.714175791 | ERCC8    | turquoise | 0.057222 | 0.781279 |
| MBNL3    | turquoise | -0.11053 | 0.590902 | CLSTN1   | turquoise | -0.073793006 | 0.714517901 | EIF3H    | turquoise | 0.057569 | 0.779983 |
| RNF24    | turquoise | -0.11047 | 0.591102 | PWWP2B   | turquoise | -0.073641938 | 0.715078337 | SUPT7L   | turquoise | 0.057803 | 0.77911  |
| HNRNP0A  | turquoise | -0.11018 | 0.592085 | NEDD4    | turquoise | -0.073491724 | 0.715635746 | CDH23    | turquoise | 0.057975 | 0.778471 |
| WAS      | turquoise | 0.110154 | 0.592175 | SPATA2L  | turquoise | -0.072609782 | 0.718911299 | ZNF562   | turquoise | 0.058057 | 0.778165 |
| BDD1     | turquoise | -0.10994 | 0.592889 | CSorf17  | turquoise | -0.07163889  | 0.722522825 | SLC45A4  | turquoise | 0.058304 | 0.777242 |
| YTHDF3   | turquoise | -0.10987 | 0.59315  | KCTD7    | turquoise | -0.071527016 | 0.722939346 | BLNK     | turquoise | 0.05866  | 0.775919 |
| GALC     | turquoise | -0.1095  | 0.59438  | SMIM4    | turquoise | -0.071421598 | 0.723331906 | AVL9     | turquoise | 0.058809 | 0.775364 |
| WR6      | turquoise | 0.108005 | 0.599461 | TBC1D24  | turquoise | -0.070810521 | 0.725608789 | AQP3     | turquoise | 0.059297 | 0.773546 |
| DNTT1P1  | turquoise | -0.10793 | 0.599703 | RABGAP1  | turquoise | -0.070710428 | 0.725981956 | CTNND1   | turquoise | 0.059625 | 0.772326 |
| PLCG1    | turquoise | -0.10777 | 0.600245 | MX2      | turquoise | -0.070461949 | 0.726908597 | PRKCI    | turquoise | 0.060313 | 0.769769 |
| PEX3     | turquoise | -0.1077  | 0.600488 | RIF1     | turquoise | -0.070442372 | 0.72698162  | RBM19    | turquoise | 0.06083  | 0.767846 |
| TEX261   | turquoise | -0.10752 | 0.601111 | TRIP11   | turquoise | -0.07022802  | 0.727781321 | LMAN2L   | turquoise | 0.060843 | 0.767799 |
| ZFYVE21  | turquoise | -0.1073  | 0.601873 | SDHB     | turquoise | -0.069470264 | 0.730610566 | RAD52    | turquoise | 0.061408 | 0.765701 |
| VAPA     | turquoise | 0.107189 | 0.602239 | PIK3R4   | turquoise | -0.069196802 | 0.731632444 | ACAP3    | turquoise | 0.06169  | 0.764657 |
| UTP20    | turquoise | -0.10702 | 0.602802 | HIVEP1   | turquoise | -0.069137239 | 0.731855079 | RPTOR    | turquoise | 0.061693 | 0.764643 |
| IQCB1    | turquoise | -0.10699 | 0.602912 | PPP6R2   | turquoise | -0.068644234 | 0.733698649 | SF3A2    | turquoise | 0.062183 | 0.762828 |
| MAP4K5   | turquoise | -0.10698 | 0.60294  | PTPN22   | turquoise | -0.068306237 | 0.734963412 | DYNC12   | turquoise | 0.062688 | 0.760956 |
| CLEC1A   | turquoise | -0.10697 | 0.602977 | CROCCP2  | turquoise | -0.068100771 | 0.735732577 | FAM1882  | turquoise | 0.063448 | 0.758143 |
| EXOC7    | turquoise | -0.10691 | 0.603194 | CYP20A1  | turquoise | -0.067468126 | 0.738102465 | HIPK2    | turquoise | 0.063652 | 0.757389 |
| APAF1    | turquoise | -0.1068  | 0.603571 | DYNC1L1  | turquoise | -0.067344154 | 0.738567139 | TBC1D5   | turquoise | 0.064537 | 0.754114 |
| ELOVL7   | turquoise | -0.10637 | 0.605042 | ERO1L    | turquoise | -0.066774835 | 0.740702216 | GNB2     | turquoise | 0.065019 | 0.752334 |
| METTL21D | turquoise | 0.105816 | 0.606922 | ARSB     | turquoise | -0.066510668 | 0.74169354  | PICALM   | turquoise | 0.065149 | 0.751856 |
| TRAPPC8  | turquoise | -0.1057  | 0.607334 | EMC2     | turquoise | -0.066464288 | 0.741867629 | FNBP4    | turquoise | 0.065159 | 0.751819 |
| ATG7     | turquoise | -0.10505 | 0.609546 | SLC25A1  | turquoise | -0.065936681 | 0.743848894 | ZBTB11   | turquoise | 0.065238 | 0.751527 |
| HINFP    | turquoise | 0.104365 | 0.611891 | AK1      | turquoise | -0.065749137 | 0.744553542 | PJA2     | turquoise | 0.06527  | 0.751408 |
| METTL25  | turquoise | -0.10413 | 0.612693 | TRIM41   | turquoise | -0.065726775 | 0.744637577 | DDX17    | turquoise | 0.066165 | 0.748107 |
| USP32    | turquoise | -0.104   | 0.61313  | ATF5     | turquoise | -0.065091324 | 0.747026687 | RMNDS5B  | turquoise | 0.066271 | 0.747718 |
| CMTM7    | turquoise | -0.1037  | 0.61416  | ABCA5    | turquoise | -0.0645034   | 0.749239149 | PPARGC1B | turquoise | 0.066784 | 0.745828 |
| TNNT1    | turquoise | -0.10336 | 0.615351 | NDUFB7   | turquoise | -0.064279899 | 0.750080728 | PTGER3   | turquoise | 0.067236 | 0.744162 |
| FRA10AC1 | turquoise | -0.10295 | 0.616756 | THAP2    | turquoise | -0.063316858 | 0.753710199 | IL27RA   | turquoise | 0.067471 | 0.743297 |
| LRPPRC   | turquoise | -0.1029  | 0.616915 | AD1      | turquoise | -0.063307437 | 0.753745726 | TAF13    | turquoise | 0.067484 | 0.743249 |
| CSNK1E   | turquoise | -0.10288 | 0.616986 | SRPK2    | turquoise | -0.062820781 | 0.755581793 | WWP2     | turquoise | 0.068047 | 0.741179 |
| HIVEP1   | turquoise | -0.10283 | 0.617176 | ZNF788   | turquoise | -0.062708292 | 0.756006374 | USP6NL   | turquoise | 0.068177 | 0.740702 |
| VP55A    | turquoise | -0.10279 | 0.617314 | ZDHH20   | turquoise | -0.062701958 | 0.756030286 | G6PD     | turquoise | 0.068223 | 0.740534 |
| WHSC1L1  | turquoise | -0.10259 | 0.617986 | HTATIP2  | turquoise | -0.062682258 | 0.75610465  | C6orf136 | turquoise | 0.068233 | 0.740496 |
| C1GALT1  | turquoise | -0.10238 | 0.618709 | ACAA1    | turquoise | -0.06250669  | 0.756767488 | TRPV2    | turquoise | 0.069331 | 0.736465 |
| FAM91A1  | turquoise | 0.102261 | 0.619125 | ZFP161   | turquoise | -0.062362524 | 0.757311896 | MLPH     | turquoise | 0.069432 | 0.736093 |
| ZNF322   | turquoise |          |          |          |           |              |             |          |           |          |          |

Table 6. Gene module membership and correlation with growth rate (48/72h), with adjusted p values for each module

|          |           |          |          |             |           |              |             |          |           |          |          |
|----------|-----------|----------|----------|-------------|-----------|--------------|-------------|----------|-----------|----------|----------|
| PPAP2A   | turquoise | 0.10071  | 0.624478 | ZNF121      | turquoise | -0.058726175 | 0.771080425 | RAB12    | turquoise | 0.072613 | 0.724455 |
| ZNF25    | turquoise | -0.10062 | 0.62479  | RNF103      | turquoise | -0.058108499 | 0.773426037 | CWC22    | turquoise | 0.072634 | 0.724376 |
| CELFI    | turquoise | -0.1006  | 0.624857 | NUCB2       | turquoise | -0.058066811 | 0.773584417 | THAP6    | turquoise | 0.073104 | 0.722665 |
| ELP2     | turquoise | -0.10041 | 0.625506 | MTMR12      | turquoise | -0.057946227 | 0.774042584 | YBEY     | turquoise | 0.073887 | 0.719811 |
| RABB8    | turquoise | -0.10031 | 0.625877 | SH3BGR1     | turquoise | -0.057898688 | 0.774223231 | SLC25A30 | turquoise | 0.07415  | 0.718851 |
| MBNL1    | turquoise | 0.100132 | 0.626477 | SNRNP70     | turquoise | -0.057401043 | 0.776114971 | DNAJB9   | turquoise | 0.074779 | 0.716565 |
| ARL6IP6  | turquoise | -0.0997  | 0.627962 | AQR         | turquoise | -0.057329997 | 0.776385147 | PTKLA    | turquoise | 0.075117 | 0.715335 |
| LYST     | turquoise | -0.09953 | 0.62855  | ATP6VOD1    | turquoise | -0.057317055 | 0.776434365 | PKNOX1   | turquoise | 0.075168 | 0.715151 |
| PROSC    | turquoise | -0.09943 | 0.628896 | RASA1       | turquoise | -0.057256596 | 0.776664303 | BAX      | turquoise | 0.075531 | 0.713828 |
| S100A16  | turquoise | -0.09925 | 0.629547 | NIP2A       | turquoise | -0.056571828 | 0.7792699   | RRN3P1   | turquoise | 0.076007 | 0.712102 |
| WNK1     | turquoise | -0.09922 | 0.629645 | MRPS17      | turquoise | -0.056339372 | 0.780154946 | NFKB1Z   | turquoise | 0.076801 | 0.709223 |
| PLEC     | turquoise | -0.09861 | 0.631756 | ITGAL       | turquoise | -0.056186656 | 0.780736537 | FBX13    | turquoise | 0.07695  | 0.708682 |
| SPATA2   | turquoise | 0.098545 | 0.631981 | CDK2AP2     | turquoise | -0.056080485 | 0.781140938 | RBM7     | turquoise | 0.076981 | 0.708569 |
| GRP107   | turquoise | -0.09852 | 0.63208  | CYB5D2      | turquoise | -0.055903893 | 0.781813692 | FAM217B  | turquoise | 0.077446 | 0.706885 |
| TRNT1    | turquoise | -0.09849 | 0.632165 | AHCYL2      | turquoise | -0.055705399 | 0.78257007  | HDAC10   | turquoise | 0.07777  | 0.705713 |
| SH3TC1   | turquoise | -0.09841 | 0.632446 | ARMC6       | turquoise | -0.055473482 | 0.783454051 | CHD2     | turquoise | 0.079083 | 0.700968 |
| MSRA     | turquoise | 0.098312 | 0.632794 | HOMER1      | turquoise | -0.055418272 | 0.78366453  | CHIC2    | turquoise | 0.079666 | 0.698864 |
| RTTN     | turquoise | -0.09825 | 0.632992 | PTEN        | turquoise | -0.054955838 | 0.785428065 | PIGO     | turquoise | 0.079812 | 0.698338 |
| PGP      | turquoise | -0.09791 | 0.634183 | NCPB2       | turquoise | -0.054265229 | 0.788063686 | ETFHD    | turquoise | 0.080134 | 0.697177 |
| RWDD2A   | turquoise | -0.09766 | 0.635061 | TWISTNB     | turquoise | -0.054089576 | 0.78873441  | KCNAB2   | turquoise | 0.08054  | 0.695711 |
| MAGT1    | turquoise | 0.097627 | 0.635174 | MAU2        | turquoise | -0.053888168 | 0.789503655 | WDR58    | turquoise | 0.081365 | 0.692745 |
| CFL1     | turquoise | 0.09761  | 0.635233 | HAU54       | turquoise | -0.053709198 | 0.790187368 | RAB10    | turquoise | 0.081463 | 0.692392 |
| RAB12    | turquoise | -0.09756 | 0.635398 | RMI1        | turquoise | -0.053380627 | 0.791442985 | POLR2I3  | turquoise | 0.081695 | 0.691558 |
| MRPL18   | turquoise | 0.097498 | 0.635625 | MON2        | turquoise | -0.053289649 | 0.791790745 | SLC9A1   | turquoise | 0.082201 | 0.689741 |
| MRPS36   | turquoise | -0.09694 | 0.63756  | ACOT8       | turquoise | -0.053074085 | 0.792614881 | IQSEC1   | turquoise | 0.082688 | 0.687991 |
| CD30LF   | turquoise | -0.09688 | 0.637794 | DISP1       | turquoise | -0.052343073 | 0.795411272 | RANBP3   | turquoise | 0.083593 | 0.684749 |
| AKAP10   | turquoise | -0.09671 | 0.638365 | ZNF714      | turquoise | -0.052064331 | 0.796478213 | MOV10    | turquoise | 0.084066 | 0.683057 |
| ARPC5L   | turquoise | -0.09641 | 0.639413 | SNX16       | turquoise | -0.051858151 | 0.79726764  | KIAA1737 | turquoise | 0.084271 | 0.682324 |
| RFX7     | turquoise | -0.09632 | 0.639741 | USP11       | turquoise | -0.051541827 | 0.798479166 | APOBR    | turquoise | 0.084578 | 0.681224 |
| NFKBIA   | turquoise | -0.09583 | 0.641434 | GTPBP10     | turquoise | -0.051518116 | 0.798569998 | GEN1     | turquoise | 0.085302 | 0.678639 |
| VPS4B    | turquoise | -0.09581 | 0.641497 | CDK11       | turquoise | -0.051422408 | 0.798936663 | PION     | turquoise | 0.085977 | 0.676229 |
| KIP3CG   | turquoise | -0.09566 | 0.642024 | VPS8        | turquoise | -0.051387677 | 0.799069731 | TMEM48   | turquoise | 0.086265 | 0.675205 |
| COX21    | turquoise | -0.09555 | 0.642407 | HAGH        | turquoise | -0.051295316 | 0.799423624 | SMN1     | turquoise | 0.086458 | 0.674516 |
| GRK5     | turquoise | -0.09549 | 0.64262  | ITPKB       | turquoise | -0.050827021 | 0.801218561 | TUBE1    | turquoise | 0.086797 | 0.673309 |
| DICER1   | turquoise | -0.09529 | 0.643321 | SNAPC1      | turquoise | -0.050427783 | 0.802749588 | IL28RA   | turquoise | 0.086797 | 0.673308 |
| RNF148   | turquoise | 0.095147 | 0.643831 | ITGB1       | turquoise | -0.050180901 | 0.803696703 | R3HCC1L  | turquoise | 0.087356 | 0.671319 |
| CLIC2    | turquoise | -0.09497 | 0.644446 | CD226       | turquoise | -0.050161898 | 0.803769617 | SCARB2   | turquoise | 0.087562 | 0.670587 |
| MDFC     | turquoise | -0.09472 | 0.645333 | MLLT6       | turquoise | -0.050089306 | 0.80404816  | ZBTB805  | turquoise | 0.087727 | 0.670001 |
| FAM173B  | turquoise | -0.09431 | 0.646775 | NDUFA5      | turquoise | -0.050035963 | 0.804252857 | ZNRF2    | turquoise | 0.087801 | 0.669738 |
| MRPL19   | turquoise | -0.09429 | 0.646823 | FBXO46      | turquoise | -0.049969037 | 0.804509694 | OGFD01   | turquoise | 0.088595 | 0.666919 |
| C19orf54 | turquoise | 0.094251 | 0.646971 | FAM208B     | turquoise | -0.049625032 | 0.805830178 | SRSF11   | turquoise | 0.088664 | 0.666676 |
| G3BP2    | turquoise | -0.09409 | 0.647541 | RHOD        | turquoise | -0.049425252 | 0.806597285 | SNRPE    | turquoise | 0.08877  | 0.666299 |
| ACE      | turquoise | -0.09408 | 0.647559 | SH3KB1      | turquoise | -0.049422963 | 0.806606073 | RAI1     | turquoise | 0.089869 | 0.662408 |
| EPB41L3  | turquoise | -0.09391 | 0.648174 | VMAc        | turquoise | -0.048459864 | 0.810306585 | SYVN1    | turquoise | 0.090919 | 0.658696 |
| AIM1     | turquoise | -0.0939  | 0.648195 | ZBTB25      | turquoise | -0.04838484  | 0.810595018 | DENND4B  | turquoise | 0.0915   | 0.656644 |
| GEN1     | turquoise | 0.09384  | 0.648412 | SLC39A8     | turquoise | -0.048363488 | 0.81067711  | NUP54    | turquoise | 0.091773 | 0.655683 |
| RNL29    | turquoise | -0.09359 | 0.649286 | MTMR3       | turquoise | -0.046842851 | 0.816528548 | RAB18    | turquoise | 0.091932 | 0.655124 |
| PLXDC2   | turquoise | 0.093508 | 0.64958  | ZNF654      | turquoise | -0.046472747 | 0.817954181 | FAM738   | turquoise | 0.092789 | 0.652105 |
| METTL21B | turquoise | -0.09338 | 0.650019 | AGTBP1      | turquoise | -0.046414507 | 0.818178569 | DUSP11   | turquoise | 0.092823 | 0.651987 |
| SNHG4    | turquoise | -0.09336 | 0.650111 | SRP54       | turquoise | -0.04635649  | 0.818402115 | SLC25A45 | turquoise | 0.093313 | 0.650264 |
| LLPH     | turquoise | -0.09306 | 0.651138 | PHAX        | turquoise | -0.046306876 | 0.818593296 | TREX1    | turquoise | 0.093969 | 0.647959 |
| DPY30    | turquoise | -0.09293 | 0.651613 | FNTB        | turquoise | -0.045876539 | 0.820251947 | FKSG29   | turquoise | 0.094096 | 0.647515 |
| RPTOR    | turquoise | 0.092699 | 0.652422 | RRP1        | turquoise | -0.045690244 | 0.820970219 | PIGG     | turquoise | 0.09419  | 0.647184 |
| NBEAL1   | turquoise | -0.09251 | 0.653084 | ST14        | turquoise | -0.045497265 | 0.821714413 | MGC2752  | turquoise | 0.09499  | 0.644382 |
| MGST2    | turquoise | -0.09239 | 0.653504 | PFND6       | turquoise | -0.045364625 | 0.822226003 | AARS2    | turquoise | 0.095079 | 0.644407 |
| TXNRD3   | turquoise | -0.09238 | 0.653541 | RXR8        | turquoise | -0.045251577 | 0.822662087 | ZNF26    | turquoise | 0.095213 | 0.6436   |
| OGFOD1   | turquoise | -0.09232 | 0.653753 | ELOVL7      | turquoise | -0.045184852 | 0.822919502 | C7orf55  | turquoise | 0.095223 | 0.643567 |
| UBR5     | turquoise | 0.092293 | 0.653853 | TBL3        | turquoise | -0.044907481 | 0.82398975  | C1GALT1  | turquoise | 0.095406 | 0.642928 |
| VAPB     | turquoise | -0.09215 | 0.654366 | FMN1        | turquoise | -0.044856566 | 0.82418624  | CYP1B1   | turquoise | 0.096473 | 0.639198 |
| NDUFV2   | turquoise | -0.09194 | 0.655103 | PSMD12      | turquoise | -0.044736912 | 0.82464805  | GDPGP1   | turquoise | 0.096531 | 0.638996 |
| DCUN1D4  | turquoise | -0.09176 | 0.655741 | SLC25A16    | turquoise | -0.0445981   | 0.825183873 | SCAF1    | turquoise | 0.097647 | 0.635104 |
| CPVL     | turquoise | -0.09175 | 0.655747 | ATAD2       | turquoise | -0.044262455 | 0.826479796 | USP14    | turquoise | 0.09887  | 0.630855 |
| SCFD1    | turquoise | -0.09173 | 0.655838 | TGFBRAP1    | turquoise | -0.043807369 | 0.82823759  | UBE2D2   | turquoise | 0.098934 | 0.630631 |
| CEP152   | turquoise | -0.09152 | 0.656569 | RAD1        | turquoise | -0.043414267 | 0.829756618 | MOB4     | turquoise | 0.100681 | 0.624577 |
| DLGAP4   | turquoise | 0.091108 | 0.658028 | PRKAA1      | turquoise | -0.043017383 | 0.831290864 | STX16    | turquoise | 0.101228 | 0.622687 |
| SLC25A16 | turquoise | -0.09094 | 0.658608 | UNC13B      | turquoise | -0.042806744 | 0.832105386 | POP5     | turquoise | 0.101633 | 0.621288 |
| TMEM180  | turquoise | -0.09079 | 0.659157 | ADAMDEC1    | turquoise | -0.04262794  | 0.832796936 | ARL1     | turquoise | 0.10188  | 0.620438 |
| SDHAP2   | turquoise | -0.09054 | 0.660021 | ZNF664      | turquoise | -0.042449447 | 0.833487404 | ABHD5    | turquoise | 0.101978 | 0.620098 |
| MCPH1    | turquoise | -0.09031 | 0.660843 | HEXB        | turquoise | -0.042373568 | 0.833780966 | CSNK2B   | turquoise | 0.102281 | 0.619053 |
| FZR1     | turquoise | -0.09025 | 0.661066 | PIB1        | turquoise | -0.0421225   | 0.834752453 | MBOAT1   | turquoise | 0.102308 | 0.618961 |
| MCM3AP   | turquoise | -0.09015 | 0.661404 | FAM175B     | turquoise | -0.041323415 | 0.837846016 | SHISA5   | turquoise | 0.102797 | 0.617279 |
| CXCL10   | turquoise | -0.08975 | 0.662833 | TEC         | turquoise | -0.040688233 | 0.840306729 | WBSRC16  | turquoise | 0.103702 | 0.614165 |
| C7orf60  | turquoise | -0.08967 | 0.663098 | TIMM9       | turquoise | -0.040479219 | 0.841116781 | SPTLCL   | turquoise | 0.10403  | 0.613041 |
| PCEID1A  | turquoise | 0.089192 | 0.664802 | EGLN1       | turquoise | -0.040466642 | 0.841165527 | SP2      | turquoise | 0.104063 | 0.612929 |
| R8orf76  | turquoise | 0.089172 | 0.664875 | R3HDM4      | turquoise | -0.040401917 | 0.841416408 | SMPD2    | turquoise | 0.105296 | 0.608703 |
| MALAT1   | turquoise | 0.088997 | 0.665496 | ORC2        | turquoise | -0.040008066 | 0.842943344 | RABL2A   | turquoise | 0.105301 | 0.608684 |
| ZNF229   | turquoise | -0.08896 | 0.665621 | ALKBH4      | turquoise | -0.039994261 | 0.842996874 | CCNY     | turquoise | 0.105693 | 0.607343 |
| SPRYD7   | turquoise | -0.08889 | 0.665587 | RGPDB       | turquoise | -0.039992292 | 0.843004509 | MARVELD1 | turquoise | 0.106401 | 0.604927 |
| SGSM3    | turquoise | 0.088375 | 0.667701 | TDG         | turquoise | -0.039410755 | 0.845260137 | TOLLIP   | turquoise | 0.107113 | 0.602498 |
| ESRRA    | turquoise | 0.088232 | 0.668207 | AGAP2       | turquoise | -0.03915087  | 0.846268546 | PTGES3   | turquoise | 0.107175 | 0.602287 |
| A4GALT   | turquoise | 0.088205 | 0.668303 | PHLPP2      | turquoise | -0.038581854 | 0.848477273 | TOR3A    | turquoise | 0.10735  | 0.601691 |
| THUMP2D  | turquoise | -0.08814 | 0.668553 | ALPK3       | turquoise | -0.038072823 | 0.850454109 | SHARPIN  | turquoise | 0.107441 | 0.601379 |
| UBR4     | turquoise | -0.08797 | 0.669131 | AASDHPTT    | turquoise | -0.037997082 | 0.850748329 | ALMS1    | turquoise | 0.107719 | 0.600433 |
| MLF1     | turquoise | -0.08794 | 0.669256 | RNF144B     | turquoise | -0.037387869 | 0.853115535 | PDS5A    | turquoise | 0.107723 | 0.600421 |
| SLC26A2  | turquoise | 0.087429 | 0.671062 | LOC10012991 | turquoise | -0.037267968 | 0.853581581 | ZBTB7A   | turquoise | 0.107937 | 0.599694 |
| ANXA11   | turquoise | -0.08741 | 0.671132 | FAM221A     | turquoise | -0.037235264 | 0.853708706 | RAD51C   | turquoise | 0.108403 | 0.598109 |
| FAM98C   | turquoise | -0.08738 | 0.671226 | PHI1D1      | turquoise | -0.037088817 | 0.854278013 | UBE2G1   | turquoise | 0.108837 | 0.596634 |
| ATP5L    | turquoise | -0.08721 | 0.671851 | FAM91A1     | turquoise | -0.036928188 | 0.854902533 | SAYS1D   | turquoise | 0.109335 | 0.594946 |
| ASMTL    | turquoise | 0.087162 | 0.67201  | USP40       | turquoise | -0.036718704 | 0.85571713  | RABGAP1  | turquoise | 0.109359 | 0.594867 |
| CYFIP1   | turquoise | -0.08716 | 0.672035 | MLST8       | turquoise | -0.03641025  | 0.856916843 | GMCL1    | turquoise | 0.110075 | 0.592442 |
| GA2A     | turquoise | -0.08713 | 0.672115 | TLL4        | turquoise | -0.035845072 | 0.85911587  | CLCN6    | turquoise | 0.110104 | 0.592344 |
| PGM3     | turquoise | -0.08659 | 0.674036 | VPS45       | turquoise | -0.035045226 | 0.862229704 | TRIM62   |           |          |          |

Table 6. Gene module membership and correlation with growth rate (48/72h), with adjusted p values for each module

|           |           |          |          |            |           |              |             |             |           |          |          |
|-----------|-----------|----------|----------|------------|-----------|--------------|-------------|-------------|-----------|----------|----------|
| TTYH3     | turquoise | -0.08504 | 0.679568 | SAYS1      | turquoise | -0.032242467 | 0.873156539 | CASC4       | turquoise | 0.115528 | 0.574119 |
| PUS3      | turquoise | -0.08502 | 0.67963  | PI4KB      | turquoise | -0.032106508 | 0.873687185 | NTMT1       | turquoise | 0.115811 | 0.573175 |
| TPP1      | turquoise | -0.085   | 0.679702 | AZIN1      | turquoise | -0.032005094 | 0.874083036 | KCTD7       | turquoise | 0.115963 | 0.572767 |
| RPLP2     | turquoise | 0.084902 | 0.680068 | RAVER1     | turquoise | -0.031601942 | 0.875656955 | HMG20A      | turquoise | 0.115967 | 0.572656 |
| FAM49B    | turquoise | -0.08488 | 0.680145 | YPEL2      | turquoise | -0.031564464 | 0.875802603 | MRPL39      | turquoise | 0.11628  | 0.571613 |
| ER1       | turquoise | -0.0846  | 0.681137 | MINK1      | turquoise | -0.0309202   | 0.87831955  | USP48       | turquoise | 0.116472 | 0.570972 |
| ZBTB44    | turquoise | -0.08456 | 0.681289 | BCAP29     | turquoise | -0.030883918 | 0.878461287 | POLR1B      | turquoise | 0.116633 | 0.570437 |
| GAPT      | turquoise | -0.08454 | 0.681357 | JMJD1C     | turquoise | -0.030737578 | 0.879033017 | SUV39H2     | turquoise | 0.116941 | 0.569414 |
| TMEM2     | turquoise | -0.08433 | 0.682128 | C6orf106   | turquoise | -0.030157742 | 0.881298916 | ZNF202      | turquoise | 0.117443 | 0.567744 |
| CCT8      | turquoise | -0.08423 | 0.682474 | IL7R       | turquoise | -0.030010861 | 0.881873047 | ATP13A2     | turquoise | 0.118973 | 0.562674 |
| PFN4      | turquoise | -0.08384 | 0.683873 | FLOT2      | turquoise | -0.029831616 | 0.882573765 | SIGMAR1     | turquoise | 0.119495 | 0.56095  |
| CCNL1     | turquoise | -0.08382 | 0.683941 | SAMD4B     | turquoise | -0.029598895 | 0.883483662 | GAK         | turquoise | 0.119516 | 0.560882 |
| CAP7      | turquoise | -0.08342 | 0.685354 | RAB2A      | turquoise | -0.029435873 | 0.884121132 | TAF7        | turquoise | 0.11997  | 0.559384 |
| RRN3P1    | turquoise | 0.08304  | 0.686732 | ZNF282     | turquoise | -0.029298788 | 0.884657235 | PPAPDC1B    | turquoise | 0.120446 | 0.557812 |
| SGK223    | turquoise | -0.08287 | 0.687337 | LXN        | turquoise | -0.029141871 | 0.885270957 | CUX1        | turquoise | 0.121115 | 0.555613 |
| PRKI      | turquoise | 0.082476 | 0.688752 | ANKRD39    | turquoise | -0.028808196 | 0.88657622  | SBN02       | turquoise | 0.121381 | 0.554739 |
| POLR2J3   | turquoise | -0.0824  | 0.689025 | ST7        | turquoise | -0.028311425 | 0.888520009 | ADIPOR2     | turquoise | 0.12235  | 0.551558 |
| PHF12     | turquoise | -0.08217 | 0.689844 | ARID1B     | turquoise | -0.027446113 | 0.891907335 | PPP1R3B     | turquoise | 0.123158 | 0.548914 |
| EXOC8     | turquoise | 0.082102 | 0.690095 | GNB2       | turquoise | -0.027196449 | 0.892885011 | GASS-AS1    | turquoise | 0.123172 | 0.548868 |
| ZNRF2     | turquoise | 0.081904 | 0.690807 | TEX264     | turquoise | -0.026811696 | 0.894391992 | CCDC126     | turquoise | 0.123189 | 0.548811 |
| MED19     | turquoise | 0.081776 | 0.691268 | ZNF576     | turquoise | -0.026763054 | 0.894582535 | SRCRB4D     | turquoise | 0.123369 | 0.548222 |
| POLR2H    | turquoise | 0.081737 | 0.691408 | CHCHD3     | turquoise | -0.026624357 | 0.895125878 | POLA1       | turquoise | 0.123854 | 0.546638 |
| RASGRP4   | turquoise | -0.08169 | 0.691593 | ZNF460     | turquoise | -0.026319034 | 0.896322141 | EXOC3       | turquoise | 0.123933 | 0.546383 |
| RANGAP1   | turquoise | -0.08167 | 0.691654 | MAGT1      | turquoise | -0.026251202 | 0.896587941 | APAF1       | turquoise | 0.12399  | 0.546197 |
| SLC12A7   | turquoise | -0.08148 | 0.69232  | GALC       | turquoise | -0.025302429 | 0.900306808 | POLE        | turquoise | 0.124301 | 0.545183 |
| RPL23     | turquoise | -0.08138 | 0.692706 | CCDC132    | turquoise | -0.024281933 | 0.904309096 | NDST1       | turquoise | 0.124472 | 0.544625 |
| ZC3H13    | turquoise | -0.0813  | 0.692966 | ESRRA      | turquoise | -0.024140304 | 0.904864732 | ACOX3       | turquoise | 0.125174 | 0.54234  |
| ARSD      | turquoise | 0.081302 | 0.692969 | GPATCH2    | turquoise | -0.023525521 | 0.907277148 | ARHGAP22    | turquoise | 0.125695 | 0.540648 |
| COPS8     | turquoise | -0.08122 | 0.693266 | CCT3       | turquoise | -0.023438524 | 0.907618592 | ABHD12      | turquoise | 0.126174 | 0.539094 |
| KLHDC2    | turquoise | 0.081122 | 0.693617 | MYCBP      | turquoise | -0.022525448 | 0.911203156 | TCF7L2      | turquoise | 0.126869 | 0.53684  |
| SMARCA2   | turquoise | -0.0811  | 0.693714 | HLTF       | turquoise | -0.022178908 | 0.912564053 | PABPN1      | turquoise | 0.127146 | 0.535945 |
| RPL37     | turquoise | 0.080706 | 0.695115 | JMJD8      | turquoise | -0.022138979 | 0.912720873 | SEC24B      | turquoise | 0.127258 | 0.535585 |
| UBE2K     | turquoise | 0.080667 | 0.695254 | GTPBP6     | turquoise | -0.021812644 | 0.914002673 | BAG6        | turquoise | 0.128803 | 0.5306   |
| RBM6      | turquoise | 0.080642 | 0.695345 | POLR2J3    | turquoise | -0.020798575 | 0.917987117 | CIC         | turquoise | 0.129048 | 0.529812 |
| C9orf41   | turquoise | -0.08056 | 0.695652 | GPAT2      | turquoise | -0.020521415 | 0.919076465 | IRF2BP1     | turquoise | 0.130326 | 0.52571  |
| RPL26     | turquoise | 0.080493 | 0.695884 | POLE       | turquoise | -0.020179246 | 0.920421519 | SLC7A7      | turquoise | 0.130747 | 0.524362 |
| TFDP2     | turquoise | -0.08023 | 0.69683  | FBXO4      | turquoise | -0.0200373   | 0.920979566 | ZNF277      | turquoise | 0.131534 | 0.521848 |
| PWWP2A    | turquoise | -0.07986 | 0.698178 | FTSJ2      | turquoise | -0.019876645 | 0.92161121  | NAA16       | turquoise | 0.131642 | 0.521502 |
| CLSTN1    | turquoise | -0.07955 | 0.699274 | UHMK1      | turquoise | -0.019682365 | 0.922375712 | FGFR10P2    | turquoise | 0.132968 | 0.517277 |
| NARS      | turquoise | 0.079539 | 0.699322 | GCN1L1     | turquoise | -0.019109784 | 0.924626901 | CLCN7       | turquoise | 0.134477 | 0.512491 |
| SPINT1    | turquoise | 0.079425 | 0.699731 | HRAS       | turquoise | -0.018541321 | 0.926863045 | EXOC59      | turquoise | 0.135308 | 0.509865 |
| TXNL1     | turquoise | 0.079406 | 0.6998   | LOC1005072 | turquoise | -0.017811331 | 0.92973538  | SLC35A1     | turquoise | 0.135672 | 0.508718 |
| NDUFBA2   | turquoise | -0.0792  | 0.700539 | RBM19      | turquoise | -0.016283122 | 0.935751249 | TMEM104     | turquoise | 0.136499 | 0.506113 |
| VMAB21    | turquoise | -0.07918 | 0.700609 | ASB13      | turquoise | -0.016220848 | 0.935996467 | ATR         | turquoise | 0.136635 | 0.505686 |
| KIAA0226L | turquoise | -0.07912 | 0.700816 | ATF1       | turquoise | -0.015886846 | 0.937311783 | IBA57       | turquoise | 0.136667 | 0.505585 |
| SDHB      | turquoise | -0.07906 | 0.701055 | PLK1S1     | turquoise | -0.015688482 | 0.938093026 | ROGDI       | turquoise | 0.137077 | 0.504296 |
| TTCl      | turquoise | 0.079004 | 0.701253 | YTHDF1     | turquoise | -0.015364695 | 0.93936836  | MBTD1       | turquoise | 0.138062 | 0.501207 |
| PCMTD1    | turquoise | -0.07899 | 0.701318 | ADCY9      | turquoise | -0.015329686 | 0.939506263 | SOLH        | turquoise | 0.138207 | 0.500753 |
| GNAI2     | turquoise | 0.07893  | 0.701519 | POLRMT     | turquoise | -0.015088325 | 0.940457043 | SMPD4       | turquoise | 0.138235 | 0.500666 |
| KATNA1    | turquoise | 0.078896 | 0.701643 | HYAL2      | turquoise | -0.014507227 | 0.942746454 | SLC25A39    | turquoise | 0.13866  | 0.499338 |
| GOLGA4    | turquoise | 0.07885  | 0.701807 | DUSL3      | turquoise | -0.014298518 | 0.943568833 | ZNFX1       | turquoise | 0.142194 | 0.488358 |
| MVP       | turquoise | -0.07859 | 0.702748 | BAG6       | turquoise | -0.013826779 | 0.945427845 | PSMC6       | turquoise | 0.143288 | 0.484982 |
| PSMC6     | turquoise | 0.078571 | 0.702817 | ELF4       | turquoise | -0.013539589 | 0.946559731 | YEATS2      | turquoise | 0.143554 | 0.484164 |
| TRPM7     | turquoise | -0.07856 | 0.702846 | KLF13      | turquoise | -0.013420603 | 0.947028715 | NELF        | turquoise | 0.143574 | 0.484101 |
| HOOK3     | turquoise | -0.07842 | 0.703364 | NDUFA6     | turquoise | -0.013296861 | 0.947516458 | TRRAP       | turquoise | 0.143627 | 0.48394  |
| WRNIP1    | turquoise | -0.07834 | 0.703651 | FAM92A1    | turquoise | -0.013244362 | 0.947723397 | WIPF2       | turquoise | 0.143702 | 0.483709 |
| PTRH1     | turquoise | 0.078193 | 0.704182 | C15orf48   | turquoise | -0.012892306 | 0.949111199 | RASA4CP     | turquoise | 0.144301 | 0.481867 |
| PITPNB    | turquoise | 0.078177 | 0.704241 | NUP43      | turquoise | -0.012817616 | 0.949405645 | RBMX        | turquoise | 0.144962 | 0.479843 |
| PTGER4    | turquoise | -0.07794 | 0.70508  | S100A10    | turquoise | -0.01241731  | 0.950983854 | FBXO22      | turquoise | 0.145695 | 0.477601 |
| FN3K      | turquoise | -0.07791 | 0.705194 | PFND1      | turquoise | -0.012112361 | 0.952186243 | LOC1001909i | turquoise | 0.146012 | 0.476631 |
| LRRC23    | turquoise | 0.077687 | 0.706012 | SLPI       | turquoise | -0.012094538 | 0.95225652  | SAMD4B      | turquoise | 0.146699 | 0.474537 |
| PIGC      | turquoise | 0.077626 | 0.706233 | METTL6     | turquoise | -0.012024638 | 0.952532143 | PAQR4       | turquoise | 0.147702 | 0.471487 |
| SLC43A2   | turquoise | -0.07739 | 0.707096 | FAM98C     | turquoise | -0.011719963 | 0.953733582 | DCAF4       | turquoise | 0.147911 | 0.470854 |
| MTMR2     | turquoise | -0.07695 | 0.708676 | CPQ        | turquoise | -0.011445252 | 0.954816946 | INPP5E      | turquoise | 0.148058 | 0.470409 |
| LMF2      | turquoise | -0.07692 | 0.708777 | PRKI       | turquoise | -0.011410946 | 0.954952239 | TMEM115     | turquoise | 0.149171 | 0.467041 |
| PLA2G6    | turquoise | -0.07644 | 0.710529 | MRP55      | turquoise | -0.011235644 | 0.955643617 | ECHDC2      | turquoise | 0.150015 | 0.464495 |
| CEACAM4   | turquoise | 0.07614  | 0.711618 | SETD1A     | turquoise | -0.011039672 | 0.956416554 | SIPA1       | turquoise | 0.151751 | 0.459282 |
| HTATIP2   | turquoise | -0.07595 | 0.712302 | EPB41L4A   | turquoise | -0.010887551 | 0.957016561 | BCL9L       | turquoise | 0.152215 | 0.457896 |
| TTBK2     | turquoise | -0.07588 | 0.712576 | C1AO1      | turquoise | -0.010783341 | 0.957427606 | NEU3        | turquoise | 0.152602 | 0.45674  |
| UGGT1     | turquoise | 0.075664 | 0.713346 | RPTOR      | turquoise | -0.010594666 | 0.958171847 | ACOT2       | turquoise | 0.152808 | 0.456126 |
| SETDB2    | turquoise | -0.0756  | 0.713577 | ANKRD6     | turquoise | -0.010586994 | 0.958202108 | FGD4        | turquoise | 0.15418  | 0.452042 |
| KCTD17    | turquoise | -0.07555 | 0.713745 | VP54B      | turquoise | -0.010433365 | 0.958808134 | LOC1001320  | turquoise | 0.154238 | 0.45187  |
| COX17     | turquoise | -0.07541 | 0.714279 | RMND5B     | turquoise | -0.009033083 | 0.964332847 | USP11       | turquoise | 0.154626 | 0.450718 |
| RBM4      | turquoise | 0.075312 | 0.714624 | ARHGAP21   | turquoise | -0.008806975 | 0.965225095 | CDK18       | turquoise | 0.155417 | 0.448375 |
| JC1005072 | turquoise | -0.075   | 0.715762 | CCDC28A    | turquoise | -0.008618305 | 0.965969643 | EGFL7       | turquoise | 0.157879 | 0.441131 |
| HMG2      | turquoise | -0.0749  | 0.71614  | PDIK1L     | turquoise | -0.008539792 | 0.966279488 | NCKAP5L     | turquoise | 0.158438 | 0.439494 |
| TRAP1     | turquoise | -0.07464 | 0.717051 | PNPO       | turquoise | -0.008435362 | 0.966691616 | PDGFC       | turquoise | 0.158874 | 0.43822  |
| LDLRAD3   | turquoise | -0.07452 | 0.717502 | SLC9A8     | turquoise | -0.008013889 | 0.968355029 | CSOX2       | turquoise | 0.158951 | 0.437995 |
| ERCC8     | turquoise | 0.074378 | 0.718024 | FAM98A     | turquoise | -0.00707789  | 0.972049557 | EWSR1       | turquoise | 0.159296 | 0.436988 |
| UTP23     | turquoise | -0.07422 | 0.718598 | PRPF4      | turquoise | -0.007007604 | 0.97232701  | CANT1       | turquoise | 0.159602 | 0.436098 |
| PPM1K     | turquoise | 0.07412  | 0.718962 | GFER       | turquoise | -0.00595861  | 0.97468255  | FAM21A      | turquoise | 0.159738 | 0.435702 |
| ACS13     | turquoise | -0.07379 | 0.720161 | LOC1002895 | turquoise | -0.00517041  | 0.979580327 | SLC10A3     | turquoise | 0.160879 | 0.432387 |
| HMGCL     | turquoise | 0.073698 | 0.720498 | TOLLIP     | turquoise | -0.005009267 | 0.980216613 | BIRC7       | turquoise | 0.160969 | 0.432125 |
| CSNK2A1   | turquoise | 0.073661 | 0.720632 | NARG2      | turquoise | -0.005004686 | 0.9802347   | PLXNA3      | turquoise | 0.162307 | 0.428256 |
| MRPL39    | turquoise | -0.07349 | 0.721268 | DSTN       | turquoise | -0.004978626 | 0.9803376   | HAAO        | turquoise | 0.163455 | 0.424955 |
| ZFP91     | turquoise | -0.07333 | 0.721854 | CYBA       | turquoise | -0.004877093 | 0.980738519 | GPRIN3      | turquoise | 0.163793 | 0.423982 |
| IWS1      | turquoise | 0.072897 | 0.72342  | DHX40      | turquoise | -0.004534513 | 0.982091273 | C9orf9      | turquoise | 0.165037 | 0.420423 |
| ABHD6     | turquoise | 0.0726   | 0.724502 | IQGAP2     | turquoise | -0.004415436 | 0.98256149  | STARDB      | turquoise | 0.165166 | 0.420056 |
| ZNF197    | turquoise | -0.07199 | 0.726729 | TMEM117    | turquoise | -0.004084471 | 0.983868442 | RAD23A      | turquoise | 0.165505 | 0.419089 |
| IL27RA    | turquoise | 0.07179  | 0.72746  | UXS1       | turquoise | -0.00397378  | 0.98430556  | ZCWPW1      | turquoise | 0.165587 | 0.418855 |
| HSBP1L1   | turquoise | -0.07174 | 0.727631 | SP2        | turquoise | -0.003597642 | 0.985790961 | UNK         | turquoise | 0.165935 | 0.417864 |
| PRKAR2A   | turquoise | -0.07154 | 0.728364 | EIF2AK4    | turquoise | -0.003384634 | 0.98663217  | RAB6A       | turquoise |          |          |

Table 6. Gene module membership and correlation with growth rate (48/72h), with adjusted p values for each module

|           |           |          |          |           |           |              |             |            |           |          |          |
|-----------|-----------|----------|----------|-----------|-----------|--------------|-------------|------------|-----------|----------|----------|
| GXYLT1    | turquoise | -0.07023 | 0.733173 | MAPK6     | turquoise | -0.000102109 | 0.99596698  | POLDIP3    | turquoise | 0.178443 | 0.383118 |
| MY8BP1A   | turquoise | -0.07019 | 0.733317 | CCAR1     | turquoise | -9.84654E-05 | 0.999611087 | IRF3       | turquoise | 0.178872 | 0.381957 |
| MBD4      | turquoise | -0.07019 | 0.733328 | OTUD6B    | turquoise | 0.000270816  | 0.998930349 | UBR3       | turquoise | 0.17998  | 0.378966 |
| PTGES3    | turquoise | 0.07008  | 0.733718 | NBR1      | turquoise | 0.00049095   | 0.998060878 | SARM1      | turquoise | 0.180355 | 0.377957 |
| TMEM70    | turquoise | -0.07007 | 0.733762 | DCTN1     | turquoise | 0.000543723  | 0.997852439 | ESRRA      | turquoise | 0.181315 | 0.375381 |
| HDX36     | turquoise | -0.07001 | 0.733979 | WDR19     | turquoise | 0.001161896  | 0.99541084  | LRP11      | turquoise | 0.181396 | 0.375165 |
| OSBPL1A   | turquoise | -0.06987 | 0.734499 | PAPOLA    | turquoise | 0.001545462  | 0.993895887 | PML        | turquoise | 0.182994 | 0.370901 |
| PURB      | turquoise | 0.069688 | 0.735155 | MYSM1     | turquoise | 0.001960933  | 0.992254944 | ACTN4      | turquoise | 0.183124 | 0.370555 |
| RBM7      | turquoise | 0.069605 | 0.735459 | TRAM1     | turquoise | 0.002060019  | 0.991863598 | TATDN1     | turquoise | 0.1843   | 0.367436 |
| DNASE2    | turquoise | -0.06957 | 0.735578 | SLCA47    | turquoise | 0.002420295  | 0.990440685 | TBC1D8     | turquoise | 0.184757 | 0.366228 |
| GTF3C6    | turquoise | -0.06941 | 0.736168 | GLUD1     | turquoise | 0.003125045  | 0.987657354 | ZBTB45     | turquoise | 0.185171 | 0.365136 |
| PCGF1     | turquoise | -0.06941 | 0.73619  | RFWD2     | turquoise | 0.004082371  | 0.983876735 | TAFL6      | turquoise | 0.186394 | 0.361921 |
| KCNAB2    | turquoise | -0.06918 | 0.737016 | XAF1      | turquoise | 0.004088627  | 0.983852029 | PAK4       | turquoise | 0.187426 | 0.359223 |
| CASZ1     | turquoise | -0.06896 | 0.737836 | SCFD1     | turquoise | 0.004882373  | 0.980717669 | JHDM1D     | turquoise | 0.188702 | 0.3559   |
| MAP4      | turquoise | -0.06886 | 0.73819  | ZFYVE21   | turquoise | 0.004949782  | 0.980451496 | TMCO4      | turquoise | 0.189483 | 0.353875 |
| APC       | turquoise | -0.06879 | 0.738458 | ADCK1     | turquoise | 0.005368686  | 0.978797441 | TJP2       | turquoise | 0.189623 | 0.353514 |
| SPATA2L   | turquoise | 0.06863  | 0.739039 | CLIC2     | turquoise | 0.007166253  | 0.971700752 | ATXN1L     | turquoise | 0.189626 | 0.353507 |
| MTOR      | turquoise | -0.06854 | 0.739363 | KIAA1107  | turquoise | 0.007569542  | 0.970108859 | KIAA0247   | turquoise | 0.189746 | 0.353196 |
| SFMBT2    | turquoise | -0.06824 | 0.740473 | GAB1      | turquoise | 0.008019582  | 0.968325262 | LPAR2      | turquoise | 0.190422 | 0.351453 |
| LSM1      | turquoise | -0.06823 | 0.740502 | ZFYVE28   | turquoise | 0.00831366   | 0.967171921 | GLA        | turquoise | 0.190704 | 0.350725 |
| GHTM      | turquoise | -0.06821 | 0.74058  | SBF2      | turquoise | 0.009194406  | 0.963696272 | PKD1L1     | turquoise | 0.193039 | 0.344747 |
| ERP44     | turquoise | -0.0679  | 0.741719 | CASP4     | turquoise | 0.009264255  | 0.963420656 | KCTD10     | turquoise | 0.193583 | 0.343363 |
| TWF1      | turquoise | -0.06789 | 0.74174  | CAPN7     | turquoise | 0.009268096  | 0.963405499 | TBC1D25    | turquoise | 0.194303 | 0.341536 |
| ZBED5     | turquoise | -0.06786 | 0.741849 | QTRT1     | turquoise | 0.009681353  | 0.961774929 | SIAH2      | turquoise | 0.194321 | 0.341489 |
| LUC7L3    | turquoise | 0.067746 | 0.742287 | ID2       | turquoise | 0.009992781  | 0.960546236 | HEATR7C    | turquoise | 0.1948   | 0.340277 |
| RP58      | turquoise | -0.06772 | 0.742399 | TPT1      | turquoise | 0.010027481  | 0.960409338 | PPCD       | turquoise | 0.196349 | 0.336376 |
| SERPING1  | turquoise | -0.06744 | 0.743399 | UHRF1BP11 | turquoise | 0.010450482  | 0.958740611 | TSPLY2     | turquoise | 0.197142 | 0.33439  |
| CCDC82    | turquoise | -0.06725 | 0.744101 | NUP98     | turquoise | 0.010698821  | 0.957760997 | MYO19      | turquoise | 0.197943 | 0.332389 |
| CCDC28A   | turquoise | -0.06673 | 0.746023 | SLC4A11   | turquoise | 0.010766184  | 0.957495281 | KIAA0195   | turquoise | 0.198099 | 0.332    |
| ZCCHC10   | turquoise | -0.06663 | 0.7464   | EPT1      | turquoise | 0.010888746  | 0.957015396 | MCFD2      | turquoise | 0.19899  | 0.329787 |
| ZN5F74    | turquoise | -0.06651 | 0.746834 | STT3B     | turquoise | 0.010888776  | 0.957011731 | ADPRH      | turquoise | 0.199288 | 0.329047 |
| PIGO      | turquoise | 0.066294 | 0.747631 | BBC3      | turquoise | 0.0109127    | 0.956917363 | MAFK       | turquoise | 0.199855 | 0.327645 |
| SCP2      | turquoise | -0.06628 | 0.74768  | CIB1      | turquoise | 0.011419521  | 0.954918424 | ZNF274     | turquoise | 0.201288 | 0.324117 |
| TCERG1    | turquoise | -0.06627 | 0.747707 | JAK2      | turquoise | 0.012070856  | 0.952349898 | GRIN2D     | turquoise | 0.202099 | 0.32213  |
| MAN2A1    | turquoise | -0.06584 | 0.749291 | NEK9      | turquoise | 0.012244995  | 0.951663265 | SMAD6      | turquoise | 0.20226  | 0.321735 |
| TMEM9     | turquoise | -0.06574 | 0.749676 | AHI1      | turquoise | 0.012326751  | 0.951340911 | MAVS       | turquoise | 0.202382 | 0.321438 |
| ELK4      | turquoise | 0.065704 | 0.749805 | C14orf101 | turquoise | 0.012579899  | 0.950342822 | FICD       | turquoise | 0.204002 | 0.317496 |
| ZN5F43    | turquoise | 0.065645 | 0.750025 | EZF3      | turquoise | 0.012605008  | 0.950243829 | SNRNP70    | turquoise | 0.20482  | 0.315518 |
| Z3H14     | turquoise | 0.065636 | 0.750057 | RETSAT    | turquoise | 0.012837098  | 0.94932884  | NEO1       | turquoise | 0.205238 | 0.314509 |
| CSDA      | turquoise | 0.065408 | 0.7509   | CARKD     | turquoise | 0.012846178  | 0.949293046 | NAGLU      | turquoise | 0.205376 | 0.314177 |
| C2orf18   | turquoise | -0.06537 | 0.751051 | IPD8      | turquoise | 0.013126456  | 0.948188166 | EOGT       | turquoise | 0.207195 | 0.309817 |
| ADH5      | turquoise | -0.06532 | 0.751241 | CD80      | turquoise | 0.013602012  | 0.946313698 | DCAF8      | turquoise | 0.207949 | 0.30802  |
| SUZ12P1   | turquoise | -0.06528 | 0.751377 | MRPL47    | turquoise | 0.014004931  | 0.944725759 | SIK3       | turquoise | 0.21015  | 0.302812 |
| GTF2H1    | turquoise | -0.06523 | 0.751556 | FCGR1A    | turquoise | 0.014090679  | 0.944387845 | CNOT3      | turquoise | 0.210706 | 0.301504 |
| TRIM39    | turquoise | 0.065173 | 0.751767 | PPIC      | turquoise | 0.014510865  | 0.942732118 | LOC388796  | turquoise | 0.21089  | 0.301074 |
| TT14      | turquoise | 0.064619 | 0.753812 | PFAS      | turquoise | 0.014748124  | 0.941797312 | ZNF271     | turquoise | 0.211484 | 0.299682 |
| ANO10     | turquoise | -0.06453 | 0.754135 | ANAPC4    | turquoise | 0.014944601  | 0.941023242 | GAA        | turquoise | 0.21163  | 0.299342 |
| ACOT7     | turquoise | 0.064488 | 0.754295 | LOC728613 | turquoise | 0.015220981  | 0.939934465 | TRMT1      | turquoise | 0.212276 | 0.297833 |
| HCG18     | turquoise | -0.06436 | 0.754775 | PPP1R9B   | turquoise | 0.015826561  | 0.937549204 | MSH6       | turquoise | 0.21229  | 0.297802 |
| SKAP2     | turquoise | -0.06436 | 0.754778 | ZNF142    | turquoise | 0.015978331  | 0.936951495 | RAVER1     | turquoise | 0.212519 | 0.297267 |
| TCTEX1D2  | turquoise | -0.06418 | 0.755423 | GLE1      | turquoise | 0.015978845  | 0.936949472 | MED13      | turquoise | 0.213985 | 0.29387  |
| BICD2     | turquoise | -0.06397 | 0.756208 | TOMM34    | turquoise | 0.016421058  | 0.93520811  | ZNF296     | turquoise | 0.215246 | 0.290965 |
| WBSR16    | turquoise | 0.063744 | 0.757047 | C16orf87  | turquoise | 0.017172479  | 0.93224981  | DGKD       | turquoise | 0.215306 | 0.290827 |
| C20orf194 | turquoise | -0.06354 | 0.757796 | UBR5      | turquoise | 0.017248946  | 0.931948814 | PPM1G      | turquoise | 0.215742 | 0.289828 |
| LYN       | turquoise | 0.062764 | 0.760673 | ZNF280D   | turquoise | 0.017392667  | 0.931383109 | DIS3L      | turquoise | 0.215847 | 0.289588 |
| HDAC4     | turquoise | 0.062639 | 0.761136 | ATF4      | turquoise | 0.017729592  | 0.930057057 | UCK1       | turquoise | 0.216033 | 0.289163 |
| RIF1      | turquoise | -0.06262 | 0.761208 | FBXO33    | turquoise | 0.017864099  | 0.92952772  | MS4A6E     | turquoise | 0.217191 | 0.286523 |
| SENPE6    | turquoise | -0.06255 | 0.761449 | DHX36     | turquoise | 0.018157542  | 0.928373012 | LZTS2      | turquoise | 0.217588 | 0.285621 |
| IL7R      | turquoise | -0.06243 | 0.761909 | ADAP1     | turquoise | 0.018352416  | 0.927606256 | FIZ1       | turquoise | 0.219578 | 0.281127 |
| LZTR1     | turquoise | -0.06202 | 0.763422 | NME7      | turquoise | 0.018892553  | 0.925481349 | ZBTB48     | turquoise | 0.220228 | 0.279669 |
| TUT1      | turquoise | 0.061942 | 0.763722 | GPR89A    | turquoise | 0.019003151  | 0.925046317 | C3orf18    | turquoise | 0.223218 | 0.273028 |
| GTPBP3    | turquoise | 0.061601 | 0.764984 | LOC387647 | turquoise | 0.019241931  | 0.924107159 | ZSCAN29    | turquoise | 0.224488 | 0.270237 |
| COP53     | turquoise | -0.06152 | 0.765268 | ATP9B     | turquoise | 0.01994164   | 0.921355666 | PLBD2      | turquoise | 0.226819 | 0.26516  |
| Z3H8      | turquoise | -0.06111 | 0.766817 | CMKP1     | turquoise | 0.020487722  | 0.919208901 | NACC2      | turquoise | 0.227411 | 0.263882 |
| CHN2      | turquoise | -0.06108 | 0.766932 | ANKHD1    | turquoise | 0.020499196  | 0.919163798 | PER2       | turquoise | 0.228766 | 0.260971 |
| FAM18B1   | turquoise | 0.060979 | 0.767295 | U2AF1     | turquoise | 0.020560822  | 0.91892157  | ABCC1      | turquoise | 0.229391 | 0.259633 |
| WBP5      | turquoise | -0.06087 | 0.767709 | STAM2     | turquoise | 0.020775844  | 0.918076454 | NSUN4      | turquoise | 0.2312   | 0.25579  |
| CASP4     | turquoise | -0.06085 | 0.767783 | NFKB1B    | turquoise | 0.021034286  | 0.917060795 | BCKDK      | turquoise | 0.232192 | 0.253701 |
| DPH3      | turquoise | -0.06069 | 0.768359 | LMBRD2    | turquoise | 0.021351415  | 0.915814673 | PIGH       | turquoise | 0.232316 | 0.25344  |
| ERIC1H    | turquoise | -0.06058 | 0.768785 | PHTF2     | turquoise | 0.021596576  | 0.914851472 | DAGLA      | turquoise | 0.232322 | 0.253426 |
| XRCC4     | turquoise | -0.06052 | 0.769009 | NUDT22    | turquoise | 0.022455893  | 0.911476285 | NOTCH1     | turquoise | 0.233512 | 0.250934 |
| LOC286367 | turquoise | 0.059877 | 0.771388 | E1F4A3    | turquoise | 0.022488568  | 0.911347975 | JUND       | turquoise | 0.234856 | 0.24814  |
| PRKAA1    | turquoise | -0.05963 | 0.772291 | SCARNA3   | turquoise | 0.023216566  | 0.908489796 | ATAD1      | turquoise | 0.235179 | 0.247469 |
| UNC50     | turquoise | -0.05959 | 0.772455 | TARBP1    | turquoise | 0.023431604  | 0.90764575  | TRIM5      | turquoise | 0.235852 | 0.246081 |
| C17orf70  | turquoise | 0.059587 | 0.772467 | FAR2      | turquoise | 0.023837181  | 0.90605409  | CCS        | turquoise | 0.238345 | 0.240977 |
| MIS18BP1  | turquoise | -0.05907 | 0.77439  | CDC42EP1  | turquoise | 0.023900346  | 0.905806233 | EDC4       | turquoise | 0.238757 | 0.24014  |
| EROL1     | turquoise | -0.05899 | 0.774702 | TT14      | turquoise | 0.024416915  | 0.903779577 | ANP8       | turquoise | 0.238955 | 0.239739 |
| PPP1R3B   | turquoise | 0.058985 | 0.774707 | POT1      | turquoise | 0.024528749  | 0.903340894 | TNFAIP1    | turquoise | 0.238965 | 0.239718 |
| EXOC5     | turquoise | -0.05894 | 0.774893 | CDKN2AIPN | turquoise | 0.024894179  | 0.901907643 | DDX51      | turquoise | 0.242019 | 0.233584 |
| MAN2C1    | turquoise | 0.058926 | 0.774926 | OSM       | turquoise | 0.025040297  | 0.901334639 | TULP4      | turquoise | 0.242473 | 0.232682 |
| BCL2L13   | turquoise | 0.05861  | 0.776105 | ARFGF1    | turquoise | 0.025668782  | 0.89887058  | DPH1       | turquoise | 0.243884 | 0.229891 |
| SHOC2     | turquoise | -0.05841 | 0.77684  | SNORA71D  | turquoise | 0.026767096  | 0.894566702 | GSTO1      | turquoise | 0.245447 | 0.226823 |
| RPS14     | turquoise | -0.05831 | 0.777203 | CNCL1     | turquoise | 0.026827683  | 0.894329367 | PLXNA1     | turquoise | 0.24569  | 0.226349 |
| DDX51     | turquoise | -0.05821 | 0.7776   | IFRD2     | turquoise | 0.027131263  | 0.893140304 | IFIT5      | turquoise | 0.245809 | 0.226118 |
| CLN5      | turquoise | -0.05792 | 0.77868  | MCOLN1    | turquoise | 0.027400334  | 0.892086594 | DCP1A      | turquoise | 0.246494 | 0.224786 |
| FBXW4     | turquoise | -0.05778 | 0.779192 | TOR1A     | turquoise | 0.027446286  | 0.891906658 | TRIM41     | turquoise | 0.246515 | 0.224744 |
| FARP1     | turquoise | 0.057686 | 0.779548 | TTC3      | turquoise | 0.027590409  | 0.891342348 | ANKRD6     | turquoise | 0.249311 | 0.219362 |
| EPB41L1   | turquoise | -0.05759 | 0.779892 | ABCD4     | turquoise | 0.02820481   | 0.888937256 | SLC4A2     | turquoise | 0.251643 | 0.214938 |
| WASF2     | turquoise | -0.05759 | 0.779914 | MOB3C     | turquoise | 0.028512423  | 0.887733459 | DYRK1B     | turquoise | 0.251878 | 0.214496 |
| LPAR2     | turquoise | -0.05757 | 0.779963 | ZFC3H1    | turquoise | 0.029155594  | 0.885217283 | ARL6IP6    | turquoise | 0.255724 | 0.207343 |
| SRSF11    | turquoise | -0.05756 | 0.780008 | CLF1      | turquoise | 0.029179877  | 0.885122305 | C17orf102  | turquoise | 0.258445 | 0.202382 |
| TEF       | turquoise | 0.05733  | 0.780877 | ATP2C1    | turquoise | 0.030067019  | 0.88165353  | CLN7orf113 | turquoise | 0.260033 | 0.1995   |

Table 6. Gene module membership and correlation with growth rate (48/72h), with adjusted p values for each module

|            |           |          |          |           |           |             |             |           |           |          |          |
|------------|-----------|----------|----------|-----------|-----------|-------------|-------------|-----------|-----------|----------|----------|
| TMEM39A    | turquoise | 0.05536  | 0.788235 | PDXP      | turquoise | 0.037687508 | 0.851951077 | INTS1     | turquoise | 0.287946 | 0.153739 |
| DTW02      | turquoise | -0.05535 | 0.788261 | CHIC2     | turquoise | 0.037760528 | 0.851667351 | IFITM1    | turquoise | 0.291346 | 0.148721 |
| ANKRD6     | turquoise | 0.05066  | 0.789335 | LAS1L     | turquoise | 0.039286728 | 0.845741359 | CxorF56   | turquoise | 0.294923 | 0.143571 |
| TOLLIP     | turquoise | 0.054634 | 0.790949 | TMEM39A   | turquoise | 0.039600317 | 0.844524745 | SLC12A4   | turquoise | 0.296533 | 0.141296 |
| ALG13      | turquoise | 0.054564 | 0.791211 | NUDCD1    | turquoise | 0.040144051 | 0.842416075 | MED22     | turquoise | 0.306261 | 0.128093 |
| SAR1A      | turquoise | -0.05439 | 0.791846 | SLC15A3   | turquoise | 0.04023636  | 0.842058196 | FBXO6     | turquoise | 0.307575 | 0.126382 |
| THRA       | turquoise | 0.054352 | 0.792005 | VPS33A    | turquoise | 0.04064749  | 0.84046462  | MIER2     | turquoise | 0.316971 | 0.114624 |
| FAM134A    | turquoise | -0.05434 | 0.792051 | ARRDC2    | turquoise | 0.040704171 | 0.840244969 | RIT1      | turquoise | 0.317699 | 0.113747 |
| CMYP1      | turquoise | -0.05421 | 0.792526 | MTM1      | turquoise | 0.041149956 | 0.838518255 | SLC16A13  | turquoise | 0.333477 | 0.095948 |
| DDHD1      | turquoise | -0.05365 | 0.794619 | ER11      | turquoise | 0.041260386 | 0.838090188 | FBXL2     | turquoise | 0.334482 | 0.09489  |
| EAPP       | turquoise | -0.05357 | 0.794921 | PIAS1     | turquoise | 0.04144642  | 0.837369663 | HEXD2     | turquoise | 0.334899 | 0.094453 |
| SNORD94    | turquoise | -0.05353 | 0.795071 | UTP23     | turquoise | 0.041524825 | 0.837066057 | KIAA1432  | turquoise | 0.335594 | 0.093728 |
| CLCN6      | turquoise | 0.053369 | 0.795688 | HSDL2     | turquoise | 0.042236514 | 0.834311254 | WDR6      | turquoise | 0.338709 | 0.090533 |
| CAMTA1     | turquoise | 0.053368 | 0.795694 | PDSS2     | turquoise | 0.042341045 | 0.833906795 | SNF8      | turquoise | 0.349024 | 0.080535 |
| CERS6      | turquoise | 0.053151 | 0.796507 | FAM1188   | turquoise | 0.042525893 | 0.833191672 | BRAT1     | turquoise | 0.354972 | 0.075165 |
| DYNC1I2    | turquoise | -0.05302 | 0.797014 | NLRP1     | turquoise | 0.04260802  | 0.832873985 | CROCCP2   | turquoise | 0.357707 | 0.072789 |
| JC1001323! | turquoise | -0.05296 | 0.797231 | POLDIP3   | turquoise | 0.042644852 | 0.83273152  | TRMT10B   | turquoise | 0.360376 | 0.070527 |
| ZNF589     | turquoise | -0.05294 | 0.797311 | ATP13A2   | turquoise | 0.04279763  | 0.832140631 | LENG9     | turquoise | 0.369158 | 0.063462 |
| FBXO33     | turquoise | -0.05288 | 0.797537 | UBE2D1    | turquoise | 0.043004519 | 0.831340604 | ANKRD54   | turquoise | 0.38346  | 0.053142 |
| FAM134B    | turquoise | -0.05286 | 0.797582 | TFDP2     | turquoise | 0.043074859 | 0.83106864  | VPS16     | turquoise | 0.395704 | 0.045393 |
| RASA1      | turquoise | -0.05267 | 0.7983   | GPR157    | turquoise | 0.043137164 | 0.830827761 | CNP       | turquoise | 0.398766 | 0.043602 |
| TMEM126#   | turquoise | -0.05267 | 0.798323 | CEP104    | turquoise | 0.043318925 | 0.830125128 | PCK2      | turquoise | 0.409217 | 0.037905 |
| RAB3GAP2   | turquoise | -0.05263 | 0.798453 | NUPL1     | turquoise | 0.043786504 | 0.828318202 | FCHSD1    | turquoise | 0.431307 | 0.02781  |
| TM2D1      | turquoise | -0.05254 | 0.798809 | GTF2H3    | turquoise | 0.043850201 | 0.828072116 | TNK2      | turquoise | 0.478064 | 0.013504 |
| KIF1B      | turquoise | 0.052529 | 0.798839 | UBE2J2    | turquoise | 0.043942615 | 0.827715112 | LOC339803 | violet    | -0.27593 | 0.172434 |
| SDHAF2     | turquoise | 0.051974 | 0.800924 | TMCO3     | turquoise | 0.044062413 | 0.827252369 | COMM02    | violet    | -0.23528 | 0.247252 |
| TBC1D24    | turquoise | -0.05197 | 0.800934 | SNAI3     | turquoise | 0.044461571 | 0.825710955 | ALDH3A2   | violet    | -0.23167 | 0.25479  |
| NUP50      | turquoise | -0.05192 | 0.801115 | PPP2R1A   | turquoise | 0.044645553 | 0.825006694 | CDC84     | violet    | -0.22346 | 0.272501 |
| FKBP3      | turquoise | -0.05181 | 0.80154  | CNEP1R1   | turquoise | 0.045459992 | 0.821858167 | P2RY1     | violet    | -0.21753 | 0.285752 |
| SDF2       | turquoise | 0.051788 | 0.801622 | BIN2      | turquoise | 0.045596334 | 0.82133235  | MACC1     | violet    | -0.21105 | 0.300707 |
| VASN       | turquoise | -0.0516  | 0.802318 | SPATS2    | turquoise | 0.046304261 | 0.818603371 | JAKMIP2   | violet    | -0.20591 | 0.312886 |
| NCK1       | turquoise | -0.05159 | 0.802353 | LYL1      | turquoise | 0.046678481 | 0.817161625 | C10orf137 | violet    | -0.19884 | 0.330158 |
| PION       | turquoise | -0.0512  | 0.803815 | DNAAF2    | turquoise | 0.046706206 | 0.817054833 | NBP1      | violet    | -0.19738 | 0.333798 |
| CCDC163P   | turquoise | -0.05086 | 0.805126 | DNPEP     | turquoise | 0.046859247 | 0.816465401 | SLC39A4   | violet    | -0.19655 | 0.335862 |
| STXB3      | turquoise | -0.05076 | 0.805499 | CMTM6     | turquoise | 0.047827002 | 0.812740403 | DNAH1     | violet    | -0.19566 | 0.338106 |
| FAM210A    | turquoise | 0.050691 | 0.805742 | ZXDB      | turquoise | 0.04945782  | 0.806472221 | PER3      | violet    | -0.1918  | 0.347913 |
| MGAT2      | turquoise | -0.05068 | 0.805776 | VAC14     | turquoise | 0.050065965 | 0.804137725 | SLC38A6   | violet    | -0.18598 | 0.363    |
| DMX11      | turquoise | -0.05051 | 0.806443 | MALAT1    | turquoise | 0.050223298 | 0.803534037 | GRB10     | violet    | -0.18415 | 0.367845 |
| EBAG9      | turquoise | -0.05013 | 0.80785  | TA1F3     | turquoise | 0.050291909 | 0.803270808 | FARS2     | violet    | -0.16445 | 0.422115 |
| EIF2AK4    | turquoise | 0.050082 | 0.808037 | KIAA0528  | turquoise | 0.05033185  | 0.803117584 | MITF      | violet    | -0.16374 | 0.424142 |
| PRPF39     | turquoise | -0.04979 | 0.809137 | MED29     | turquoise | 0.05047977  | 0.802550183 | QTRTD1    | violet    | -0.16185 | 0.429584 |
| SNX13      | turquoise | -0.04958 | 0.809914 | ZNF266    | turquoise | 0.050508836 | 0.802438701 | LGALS1    | violet    | -0.15446 | 0.451206 |
| SNW1       | turquoise | 0.049232 | 0.811237 | SLAMF7    | turquoise | 0.051309261 | 0.799370189 | FAM149B1  | violet    | -0.14912 | 0.467194 |
| RAB2A      | turquoise | -0.04919 | 0.811374 | OGDH      | turquoise | 0.051822515 | 0.797404106 | PIP5K1    | violet    | -0.14831 | 0.469638 |
| CYP251     | turquoise | 0.048873 | 0.812588 | ERP44     | turquoise | 0.051914946 | 0.797050162 | PDXK      | violet    | -0.12927 | 0.52911  |
| NFXL1      | turquoise | -0.04886 | 0.812655 | DAP3      | turquoise | 0.053110219 | 0.792476719 | SNX24     | violet    | -0.09036 | 0.660673 |
| PICALM     | turquoise | 0.048464 | 0.814127 | IMPA2     | turquoise | 0.053236056 | 0.791995617 | LYZ       | violet    | -0.08884 | 0.666048 |
| ASXL1      | turquoise | 0.048261 | 0.814895 | MRPS24    | turquoise | 0.053548609 | 0.790800987 | CDC42EP3  | violet    | -0.07858 | 0.702801 |
| CD4        | turquoise | -0.04822 | 0.815054 | OSCAR     | turquoise | 0.054004521 | 0.789059239 | TCEA3     | violet    | -0.06505 | 0.752223 |
| ELL3       | turquoise | -0.0482  | 0.815114 | SLC25A25  | turquoise | 0.054467599 | 0.787291129 | MICAL1    | violet    | -0.03746 | 0.855841 |
| VRK2       | turquoise | -0.04792 | 0.81619  | GOLPH3L   | turquoise | 0.054840585 | 0.785867752 | TMEM9     | violet    | 0.009322 | 0.96395  |
| SFXN3      | turquoise | -0.04776 | 0.816784 | BNIP2     | turquoise | 0.054944974 | 0.785469509 | GADD45G   | violet    | 0.011672 | 0.95487  |
| CLCN7      | turquoise | -0.04755 | 0.817585 | CLPTM1L   | turquoise | 0.055056684 | 0.785043389 | SIL1      | violet    | 0.023938 | 0.907594 |
| POP5       | turquoise | -0.04699 | 0.819695 | FAM18B1   | turquoise | 0.055832432 | 0.782085978 | KIF16B    | violet    | 0.049237 | 0.811216 |
| TRMT1      | turquoise | 0.046603 | 0.821152 | SLC19A3   | turquoise | 0.056348936 | 0.78018528  | ITM2B     | violet    | 0.060322 | 0.769733 |
| SKP1       | turquoise | -0.04639 | 0.821946 | CYB5A     | turquoise | 0.056587135 | 0.779211633 | SNORA68   | violet    | 0.089402 | 0.664062 |
| CNOT1      | turquoise | -0.04639 | 0.821961 | ZCCHC10   | turquoise | 0.056727482 | 0.778677421 | MOB3B     | violet    | 0.097063 | 0.63714  |
| FOLR3      | turquoise | -0.04638 | 0.821999 | GRN       | turquoise | 0.056819493 | 0.778327247 | SMAP2     | violet    | 0.099108 | 0.630027 |
| CRLF3      | turquoise | -0.04615 | 0.822845 | ANKRD54   | turquoise | 0.057209125 | 0.776844859 | FBXO25    | violet    | 0.183511 | 0.369527 |
| SLRP       | turquoise | 0.04577  | 0.824298 | RGPD6     | turquoise | 0.057710858 | 0.774937099 | LRCH4     | violet    | 0.184422 | 0.367113 |
| FOXO3B     | turquoise | -0.04553 | 0.825218 | SFXN3     | turquoise | 0.057960264 | 0.773989246 | SNORA84   | violet    | 0.185651 | 0.363872 |
| SIRT3      | turquoise | -0.04535 | 0.825874 | PELI1     | turquoise | 0.058274317 | 0.772796155 | PELI2     | violet    | 0.208243 | 0.307321 |
| HSPA9      | turquoise | 0.045303 | 0.826063 | LOC728730 | turquoise | 0.058481445 | 0.772009548 | FAM129A   | violet    | 0.214109 | 0.293584 |
| CHIC2      | turquoise | 0.04527  | 0.826189 | GATAD1    | turquoise | 0.058614856 | 0.771503011 | SCARNA7   | violet    | 0.227238 | 0.264255 |
| SLC33A1    | turquoise | 0.045237 | 0.826312 | HPCAL1    | turquoise | 0.059178392 | 0.769364385 | PRKDCBP   | violet    | 0.243674 | 0.230304 |
| B3GALNT1   | turquoise | 0.04509  | 0.826869 | KDM5A     | turquoise | 0.060614318 | 0.763922499 | ABTB1     | violet    | 0.259834 | 0.19988  |
| BCL7B      | turquoise | -0.04507 | 0.826928 | NAASO     | turquoise | 0.061838881 | 0.759290255 | SNORA33   | violet    | 0.295794 | 0.142337 |
| ZNF417     | turquoise | -0.04492 | 0.827497 | OPA1      | turquoise | 0.062620883 | 0.756336344 | DCLE1B    | violet    | 0.31508  | 0.116922 |
| ZBTB80S    | turquoise | -0.0449  | 0.827594 | SLC39A7   | turquoise | 0.063398408 | 0.753402657 | FAM100B   | violet    | 0.507589 | 0.008121 |
| HCF1R1     | turquoise | -0.04489 | 0.827635 | ERCC8     | turquoise | 0.063646371 | 0.752467762 | PDHB      | white     | -0.39067 | 0.048461 |
| TMCC1      | turquoise | 0.044757 | 0.82813  | CTBP1     | turquoise | 0.063909623 | 0.751475601 | ANAPC15   | white     | -0.356   | 0.074265 |
| ITH5       | turquoise | -0.04463 | 0.828616 | PIGC      | turquoise | 0.065027198 | 0.747267912 | KLIF      | white     | -0.31276 | 0.11979  |
| VKORC1     | turquoise | -0.0446  | 0.82874  | PLBD2     | turquoise | 0.065744875 | 0.744569557 | MAF       | white     | -0.28515 | 0.157955 |
| NOTCH1     | turquoise | 0.044294 | 0.829882 | ZNF638    | turquoise | 0.065750185 | 0.744549606 | FOS       | white     | -0.28439 | 0.159105 |
| SNRPG      | turquoise | -0.04419 | 0.830284 | RAB10     | turquoise | 0.065755121 | 0.744531058 | C1orf162  | white     | -0.28223 | 0.162435 |
| RUSC1      | turquoise | 0.044185 | 0.830295 | KAT6B     | turquoise | 0.065801416 | 0.744357097 | ABHD13    | white     | -0.26864 | 0.184523 |
| TMEM30A    | turquoise | -0.04406 | 0.830778 | TBC1D23   | turquoise | 0.066327677 | 0.742380477 | PABPC1    | white     | -0.259   | 0.201376 |
| PSTPIP2    | turquoise | -0.04359 | 0.832535 | NEU1      | turquoise | 0.067135843 | 0.739348133 | PIGM      | white     | -0.25543 | 0.207893 |
| PPAT       | turquoise | 0.043501 | 0.832884 | CDC123    | turquoise | 0.067734613 | 0.73710392  | KIAA1143  | white     | -0.21815 | 0.284353 |
| PM2M2      | turquoise | -0.04348 | 0.832954 | APAF1     | turquoise | 0.067958819 | 0.736264126 | LRP1      | white     | -0.2051  | 0.314833 |
| BDP1       | turquoise | -0.04342 | 0.833178 | ZNF226    | turquoise | 0.067963385 | 0.736247025 | RPL13P5   | white     | -0.20361 | 0.318437 |
| BNIP2      | turquoise | -0.04335 | 0.83346  | MEF2A     | turquoise | 0.068280158 | 0.735061023 | ZNF710    | white     | -0.20102 | 0.324763 |
| MRPL2      | turquoise | -0.04324 | 0.83386  | NETO2     | turquoise | 0.068472648 | 0.734340627 | TET3      | white     | -0.19395 | 0.342437 |
| SOLH       | turquoise | 0.043167 | 0.834152 | ZFYVE16   | turquoise | 0.068548214 | 0.734057881 | TAPBP1    | white     | -0.18781 | 0.358229 |
| SRCR84D    | turquoise | 0.042853 | 0.83534  | SPINT1    | turquoise | 0.068728111 | 0.733384892 | SH2B1     | white     | -0.18678 | 0.360909 |
| NUDCD1     | turquoise | 0.042348 | 0.837255 | TUBGCP3   | turquoise | 0.068772887 | 0.733217418 | CNN2      | white     | -0.18592 | 0.363172 |
| NDUF8B     | turquoise | -0.04217 | 0.837933 | RPAP2     | turquoise | 0.068799319 | 0.733118561 | ELMO1     | white     | -0.17223 | 0.400163 |
| SHISA5     | turquoise | -0.04183 | 0.839219 | PURB      | turquoise | 0.068961207 | 0.732513178 | EIF4G3    | white     | -0.16878 | 0.409815 |
| NCF498     | turquoise | 0.041764 | 0.83947  | RBM3      | turquoise | 0.069101699 | 0.731987929 | AXL       | white     | -0.16116 | 0.431577 |
| TCF20      | turquoise | -0.04175 | 0.83952  | LAMTOR3   | turquoise | 0.06928556  | 0.731300721 | GAB3      | white     | -0.15666 | 0.4447   |
| PQLC1      | turquoise | -0.04159 | 0.840117 | JUNB      | turquoise | 0.06944339  | 0.730710969 | SNP2      | white     | -0.14726 | 0.472834 |
| ATE1       | turquoise | 0.041369 | 0.840968 | LAMTOR4   | turquoise | 0.070216369 | 0.727824796 | ZNF510    | white     | -0.14287 | 0.486257 |
| KNTC1      | turquoise | 0.041273 | 0.841335 | TBC1D8    | turquoise | 0.070375    |             |           |           |          |          |

Table 6. Gene module membership and correlation with growth rate (48/72h), with adjusted p values for each module

|           |           |          |          |           |           |             |             |           |        |          |          |
|-----------|-----------|----------|----------|-----------|-----------|-------------|-------------|-----------|--------|----------|----------|
| CTNNAL1   | turquoise | 0.040227 | 0.845309 | PIK3R1    | turquoise | 0.07340612  | 0.715953467 | ZZEF1     | white  | -0.08056 | 0.695624 |
| PLBD2     | turquoise | 0.040216 | 0.84535  | ICOS      | turquoise | 0.073712864 | 0.714815194 | PCTP      | white  | -0.07542 | 0.714232 |
| RAC2      | turquoise | 0.040213 | 0.84536  | PIP4K2C   | turquoise | 0.073969469 | 0.713863437 | ZFH3      | white  | -0.06506 | 0.752199 |
| KLHL26    | turquoise | -0.04021 | 0.84539  | IFNAR2    | turquoise | 0.073983811 | 0.713810252 | ZNF417    | white  | -0.05544 | 0.787952 |
| GATA01    | turquoise | -0.04016 | 0.845558 | ASB6      | turquoise | 0.074089028 | 0.71342013  | ZNF529    | white  | -0.04846 | 0.81414  |
| PPP6R1    | turquoise | 0.040049 | 0.845986 | PPDCD     | turquoise | 0.074372224 | 0.712370443 | SNX29     | white  | -0.04587 | 0.823926 |
| PER2      | turquoise | -0.03998 | 0.846243 | CRCP      | turquoise | 0.074997354 | 0.710055168 | RASGRP4   | white  | -0.04573 | 0.824435 |
| ATGA4     | turquoise | -0.03986 | 0.846717 | ZDHH4     | turquoise | 0.076678626 | 0.70384079  | CCPG1     | white  | -0.04219 | 0.837873 |
| CAMSAP2   | turquoise | -0.03964 | 0.847557 | RP56KA1   | turquoise | 0.077367744 | 0.701298978 | AMD1      | white  | -0.03902 | 0.849912 |
| NCOA3     | turquoise | -0.03937 | 0.848561 | UBQLN2    | turquoise | 0.077798329 | 0.699712349 | TSC2      | white  | -0.03692 | 0.857882 |
| ATAD3B    | turquoise | 0.03935  | 0.84864  | C17orf103 | turquoise | 0.078810138 | 0.695988871 | PDIA3P    | white  | -0.0334  | 0.871326 |
| GDF15     | turquoise | -0.03935 | 0.848657 | C5orf24   | turquoise | 0.07885693  | 0.695816842 | LOC152217 | white  | -0.0303  | 0.883169 |
| USP8      | turquoise | -0.03863 | 0.851369 | TSPAN31   | turquoise | 0.079731458 | 0.692604364 | SLC4A11   | white  | -0.0158  | 0.938951 |
| ACAP3     | turquoise | -0.03848 | 0.851948 | CD101     | turquoise | 0.080079022 | 0.691329065 | PLCB2     | white  | -0.01349 | 0.947849 |
| PAPOLA    | turquoise | -0.03808 | 0.853462 | TAF12     | turquoise | 0.080753876 | 0.688855205 | VAPA      | white  | -0.00329 | 0.987269 |
| ANKRD13D  | turquoise | -0.03807 | 0.853522 | MTA3      | turquoise | 0.081132665 | 0.687468017 | ARHGAP27  | white  | -0.0028  | 0.989186 |
| AGTPBP1   | turquoise | -0.03794 | 0.854015 | EID1      | turquoise | 0.081894309 | 0.684681738 | GALNT10   | white  | 0.005869 | 0.977298 |
| UBE2D2    | turquoise | 0.037932 | 0.854038 | RIPK2     | turquoise | 0.082788476 | 0.681415792 | ARF4      | white  | 0.009533 | 0.963134 |
| RCHY1     | turquoise | -0.03786 | 0.854321 | ATG7      | turquoise | 0.083093296 | 0.68003713  | KCTD12    | white  | 0.015142 | 0.941476 |
| R3HDM1    | turquoise | -0.03759 | 0.855335 | ABCC1     | turquoise | 0.083122768 | 0.680196224 | CD63      | white  | 0.027973 | 0.892102 |
| TMEM41B   | turquoise | -0.03713 | 0.857089 | SLC12A4   | turquoise | 0.083149671 | 0.68009811  | DCTN2     | white  | 0.036094 | 0.861041 |
| FBXL18    | turquoise | -0.037   | 0.857573 | SF3B1     | turquoise | 0.083394154 | 0.679206729 | PUM1      | white  | 0.041677 | 0.839799 |
| RGPD8     | turquoise | 0.036988 | 0.857632 | INTS10    | turquoise | 0.083418954 | 0.679116331 | ARHGAP32  | white  | 0.049911 | 0.80868  |
| SPTLC1    | turquoise | 0.03684  | 0.858197 | PPP2R1B   | turquoise | 0.083876255 | 0.677450229 | CTS1      | white  | 0.057596 | 0.779883 |
| SART3     | turquoise | -0.03683 | 0.858238 | DNAJC18   | turquoise | 0.084862185 | 0.673863188 | SDF4      | white  | 0.084308 | 0.682192 |
| DNAJC2    | turquoise | -0.03672 | 0.85866  | ARHGAP5   | turquoise | 0.084958328 | 0.67351377  | CCDC28A   | white  | 0.103923 | 0.613408 |
| FAM206A   | turquoise | -0.03647 | 0.859623 | FAM49B    | turquoise | 0.085180735 | 0.672705712 | FBXW11    | white  | 0.109258 | 0.595207 |
| SWAP      | turquoise | 0.035967 | 0.861527 | CINP      | turquoise | 0.085414849 | 0.671855505 | TOMM34    | white  | 0.111239 | 0.58851  |
| CACUL1    | turquoise | 0.035809 | 0.862129 | CRLF3     | turquoise | 0.085527873 | 0.671445187 | ATP5B     | white  | 0.138056 | 0.501228 |
| SETD5     | turquoise | 0.035521 | 0.863228 | PCNA      | turquoise | 0.08703976  | 0.665965386 | C1QB      | white  | 0.146121 | 0.476298 |
| ARHGAP18  | turquoise | -0.03543 | 0.863572 | ZMYM1     | turquoise | 0.087374049 | 0.664756005 | C12orf57  | white  | 0.149758 | 0.46527  |
| BTBD10    | turquoise | 0.035237 | 0.864308 | PIAS2     | turquoise | 0.08748258  | 0.664363541 | KHDRBS1   | white  | 0.172207 | 0.400229 |
| C6orf62   | turquoise | -0.03466 | 0.866503 | VPS28     | turquoise | 0.087563399 | 0.664071343 | SPIRE2    | white  | 0.177977 | 0.384383 |
| CRYBB2P1  | turquoise | -0.03454 | 0.866957 | CBL       | turquoise | 0.087636097 | 0.66380855  | ANGPT4    | white  | 0.190676 | 0.350799 |
| ODF2      | turquoise | 0.034542 | 0.866964 | HRSF12    | turquoise | 0.087932035 | 0.662739165 | E1F1B     | white  | 0.218062 | 0.284547 |
| ZNF337    | turquoise | 0.034317 | 0.867823 | FGR       | turquoise | 0.088110848 | 0.662093331 | PNRC2     | white  | 0.218988 | 0.282456 |
| ATXN3     | turquoise | -0.03425 | 0.868061 | TBC1D25   | turquoise | 0.088987244 | 0.658931395 | ANXA7     | white  | 0.257209 | 0.204625 |
| ITH4      | turquoise | -0.034   | 0.869045 | WBSR16    | turquoise | 0.089115711 | 0.658468376 | MARS2     | white  | 0.261437 | 0.19702  |
| KIAA0020  | turquoise | -0.03378 | 0.869867 | DNAJB6    | turquoise | 0.089387331 | 0.657489819 | ZSCAN16   | white  | 0.269938 | 0.182322 |
| INO80E    | turquoise | -0.03324 | 0.871953 | TMEM165   | turquoise | 0.08924505  | 0.655556181 | KCTD18    | white  | 0.384111 | 0.052705 |
| PSMD12    | turquoise | -0.03306 | 0.87264  | ZFP36L2   | turquoise | 0.090590917 | 0.653160343 | PCDC6IP   | yellow | -0.61821 | 0.000763 |
| VPS13C    | turquoise | -0.03305 | 0.872656 | EV12A     | turquoise | 0.09063002  | 0.653019867 | TUBB      | yellow | -0.49652 | 0.009877 |
| KIAA1522  | turquoise | -0.033   | 0.87286  | POLR3GL   | turquoise | 0.091172178 | 0.651073369 | SLC7A6    | yellow | -0.49535 | 0.01008  |
| POLR2B    | turquoise | -0.033   | 0.872865 | ZMYM6     | turquoise | 0.091233871 | 0.650852016 | SNHG8     | yellow | -0.46685 | 0.0162   |
| ABHD12    | turquoise | -0.03224 | 0.875766 | HMOX2     | turquoise | 0.091234525 | 0.650849667 | ACOT4     | yellow | -0.44385 | 0.023125 |
| SMAD5     | turquoise | 0.032178 | 0.875998 | RCHY1     | turquoise | 0.091520841 | 0.64982275  | CKAP2     | yellow | -0.43885 | 0.024908 |
| ZNF513    | turquoise | -0.03209 | 0.876323 | NADSYN1   | turquoise | 0.091859652 | 0.648608356 | EMC1      | yellow | -0.42662 | 0.029747 |
| KLF3      | turquoise | -0.03154 | 0.878444 | ZNF83     | turquoise | 0.091944677 | 0.64830374  | YWHA8     | yellow | -0.42319 | 0.031232 |
| CXCL9     | turquoise | -0.03121 | 0.879681 | TUBA1A    | turquoise | 0.092125051 | 0.647657701 | CBY1      | yellow | -0.42065 | 0.032368 |
| JMJD1C    | turquoise | -0.03119 | 0.879764 | KPNB1     | turquoise | 0.092584242 | 0.646014161 | POLR3F    | yellow | -0.41833 | 0.033434 |
| RUFY3     | turquoise | -0.03088 | 0.880962 | ZMYM2     | turquoise | 0.092859434 | 0.645029969 | VT11B     | yellow | -0.41696 | 0.034078 |
| TMEM117   | turquoise | -0.03083 | 0.881157 | HSPA13    | turquoise | 0.093842592 | 0.641518594 | CAPN2     | yellow | -0.41684 | 0.034138 |
| DENN4D8   | turquoise | 0.030467 | 0.882542 | ERGIC2    | turquoise | 0.094067468 | 0.640716497 | MZT2B     | yellow | -0.41415 | 0.035432 |
| DNAJA2    | turquoise | 0.030466 | 0.882549 | CCDC7     | turquoise | 0.096081285 | 0.633551158 | GLUL      | yellow | -0.40504 | 0.040105 |
| ALAD      | turquoise | -0.03044 | 0.882633 | CYTI1     | turquoise | 0.096384449 | 0.63247524  | DNMBP     | yellow | -0.40224 | 0.041635 |
| ZNF668    | turquoise | 0.030246 | 0.88339  | USP8      | turquoise | 0.097024044 | 0.630207742 | GLIPR1    | yellow | -0.40109 | 0.042281 |
| SRFBP1    | turquoise | 0.030201 | 0.883563 | AGPAT6    | turquoise | 0.097072315 | 0.630036741 | INTS6     | yellow | -0.39715 | 0.044538 |
| AP4E1     | turquoise | -0.02921 | 0.887366 | BAX       | turquoise | 0.097204711 | 0.629567829 | TMEM222   | yellow | -0.39701 | 0.044624 |
| BLMH      | turquoise | -0.0292  | 0.887404 | MAN2A2    | turquoise | 0.09826276  | 0.625825527 | RP515A    | yellow | -0.39361 | 0.046653 |
| SLC27A1   | turquoise | 0.029045 | 0.88799  | LACE1     | turquoise | 0.098672156 | 0.624379919 | RPL35A    | yellow | -0.3929  | 0.047086 |
| LOC152217 | turquoise | -0.02899 | 0.888196 | HIC2      | turquoise | 0.098872761 | 0.623672061 | MRPL52    | yellow | -0.38876 | 0.04967  |
| KDM5A     | turquoise | 0.028758 | 0.88909  | KBTBD8    | turquoise | 0.099300383 | 0.62216424  | HIST1H3E  | yellow | -0.38149 | 0.054482 |
| GSTO1     | turquoise | -0.02841 | 0.890441 | COP57A    | turquoise | 0.099391581 | 0.621842861 | SRSF2     | yellow | -0.38122 | 0.054667 |
| RCE1      | turquoise | -0.02807 | 0.891717 | CUL4B     | turquoise | 0.099668264 | 0.620868256 | KIAA0494  | yellow | -0.38104 | 0.054791 |
| BUB3      | turquoise | -0.02807 | 0.891734 | FAM135A   | turquoise | 0.100145283 | 0.619189441 | RPUSD1    | yellow | -0.37992 | 0.055562 |
| KLIF6     | turquoise | -0.02805 | 0.891805 | MBD1      | turquoise | 0.100550436 | 0.617765015 | DDT       | yellow | -0.37583 | 0.058471 |
| GPATCH4   | turquoise | 0.027912 | 0.892334 | RTTN      | turquoise | 0.100682457 | 0.617301148 | UBE4A     | yellow | -0.37527 | 0.058878 |
| PGAP1     | turquoise | -0.02786 | 0.892544 | ARHGAP22  | turquoise | 0.100807305 | 0.616862619 | ABR       | yellow | -0.3713  | 0.061824 |
| NETO2     | turquoise | -0.0274  | 0.894293 | CTSF3     | turquoise | 0.100872813 | 0.616632571 | DNAJB1    | yellow | -0.37042 | 0.062497 |
| OMA1      | turquoise | -0.02731 | 0.894654 | FAM206A   | turquoise | 0.100989051 | 0.616224463 | ORAI2     | yellow | -0.36322 | 0.068179 |
| HINT3     | turquoise | -0.02708 | 0.895533 | E1F253    | turquoise | 0.10116841  | 0.615594953 | HIST1H2BC | yellow | -0.36287 | 0.068459 |
| TRIM25    | turquoise | -0.02695 | 0.896028 | SMCHD1    | turquoise | 0.101500491 | 0.614430126 | INPP1     | yellow | -0.36282 | 0.068502 |
| TASP1     | turquoise | -0.0269  | 0.896217 | PCDC2L    | turquoise | 0.101561719 | 0.61421546  | DARS2     | yellow | -0.36143 | 0.069652 |
| GUSBP11   | turquoise | 0.026556 | 0.897538 | BCL7C     | turquoise | 0.101631486 | 0.613970893 | CPPED1    | yellow | -0.36136 | 0.069706 |
| MEF2A     | turquoise | -0.02651 | 0.897719 | ALAD      | turquoise | 0.101788147 | 0.613421864 | REEP4     | yellow | -0.36069 | 0.070263 |
| SLC35A1   | turquoise | -0.02647 | 0.897877 | SRSF11    | turquoise | 0.10194733  | 0.612864207 | TMEM64    | yellow | -0.35795 | 0.072582 |
| JHDM1D    | turquoise | -0.0262  | 0.898892 | DCAF13    | turquoise | 0.102075201 | 0.612416396 | NEIL2     | yellow | -0.35688 | 0.073502 |
| NMD3      | turquoise | -0.02602 | 0.899605 | MAD2L2    | turquoise | 0.102200403 | 0.611978062 | MCU       | yellow | -0.3556  | 0.074617 |
| MOB4      | turquoise | 0.025893 | 0.900084 | DGCR6L    | turquoise | 0.102217854 | 0.611916976 | LOC541471 | yellow | -0.3549  | 0.075229 |
| DAGLA     | turquoise | -0.02567 | 0.900936 | SERPINH1  | turquoise | 0.102270607 | 0.611732337 | ARPP19    | yellow | -0.35257 | 0.077303 |
| EPB41L2   | turquoise | -0.02559 | 0.901247 | GBF1      | turquoise | 0.102530476 | 0.610823101 | DTD1      | yellow | -0.35065 | 0.079036 |
| EMRAP     | turquoise | 0.02555  | 0.901401 | HSPA9     | turquoise | 0.103597316 | 0.607096333 | NRBP1     | yellow | -0.35044 | 0.07923  |
| DNPEP     | turquoise | -0.0255  | 0.901593 | SCARB2    | turquoise | 0.104276757 | 0.60472784  | RPL10     | yellow | -0.34841 | 0.081104 |
| TNFRSF10C | turquoise | 0.025407 | 0.901951 | CWF19L2   | turquoise | 0.104299538 | 0.604648496 | LOC92249  | yellow | -0.34789 | 0.081596 |
| FRY       | turquoise | -0.02535 | 0.902183 | FICD      | turquoise | 0.104453964 | 0.604110746 | C5orf27   | yellow | -0.34757 | 0.081888 |
| DPH1      | turquoise | -0.02527 | 0.902461 | SQSTM1    | turquoise | 0.104521434 | 0.603875864 | DAGLB     | yellow | -0.34699 | 0.082436 |
| GPI       | turquoise | -0.0252  | 0.902755 | ZNRF2     | turquoise | 0.104723246 | 0.603173526 | RNASEH2B  | yellow | -0.34695 | 0.082475 |
| ODC1      | turquoise | 0.025004 | 0.903497 | HMG20B    | turquoise | 0.104772508 | 0.603002137 | RRAS      | yellow | -0.3468  | 0.082621 |
| PTK2      | turquoise | 0.024893 | 0.903924 | C7orf73   | turquoise | 0.104908124 | 0.602530422 | MRP63     | yellow | -0.34528 | 0.084059 |
| ARF4      | turquoise | 0.024418 | 0.90575  | HSPB1L1   | turquoise | 0.105187258 | 0.601559999 | SNX18     | yellow | -0.34479 | 0.08453  |
| PCDC7     | turquoise | 0.02432  | 0.906124 | STK38L    | turquoise | 0.105449597 | 0.600648568 | BCAP31    | yellow | -0.34301 | 0.086255 |
| SMC5      | turquoise | 0.024164 | 0.906725 | GOLM1     | turquoise | 0.105464452 | 0.600596976 | NDUFB10   | yellow | -0.342   | 0.087245 |
| KIAA0196  | turquoise | 0.023935 | 0.907606 | UNC45A    | turquoise | 0.105531049 | 0.600365701 | KLIF10    | yellow | -0.34107 | 0.08816  |

Table 6. Gene module membership and correlation with growth rate (48/72h), with adjusted p values for each module

|           |           |          |          |          |           |             |              |           |        |          |          |
|-----------|-----------|----------|----------|----------|-----------|-------------|--------------|-----------|--------|----------|----------|
| SNX16     | turquoise | -0.02344 | 0.909493 | HDAC3    | turquoise | 0.109487888 | 0.58669317   | IFT140    | yellow | -0.3315  | 0.098058 |
| UBE2D1    | turquoise | -0.02342 | 0.909594 | ZNF7     | turquoise | 0.109512463 | 0.586608679  | PTP4A2    | yellow | -0.33122 | 0.09836  |
| INTS1     | turquoise | 0.02338  | 0.90974  | RAP1B    | turquoise | 0.109922573 | 0.585199448  | PHF21A    | yellow | -0.33092 | 0.098683 |
| FAM208A   | turquoise | -0.02335 | 0.909859 | TAB2     | turquoise | 0.110684173 | 0.582586346  | RPS27     | yellow | -0.33002 | 0.099656 |
| PHF3      | turquoise | 0.023336 | 0.909909 | EBAG9    | turquoise | 0.111453944 | 0.579950414  | TPMT      | yellow | -0.32983 | 0.099867 |
| CWC22     | turquoise | -0.02309 | 0.910849 | KLHD2    | turquoise | 0.111754534 | 0.57892253   | WDR74     | yellow | -0.32977 | 0.09993  |
| PHF6      | turquoise | -0.02234 | 0.913726 | MKNK2    | turquoise | 0.112777158 | 0.575431639  | UBE2A     | yellow | -0.32944 | 0.100286 |
| ROMO1     | turquoise | -0.02229 | 0.913917 | ACAT1    | turquoise | 0.113110628 | 0.574295307  | FAM103A1  | yellow | -0.32909 | 0.100673 |
| UBE3B     | turquoise | -0.02226 | 0.914048 | PAK4     | turquoise | 0.113790651 | 0.571981157  | CHD1L     | yellow | -0.32833 | 0.101512 |
| TCTEX1D4  | turquoise | 0.022218 | 0.914208 | KCTD5    | turquoise | 0.115074969 | 0.56762195   | RAF1      | yellow | -0.32569 | 0.104447 |
| GTF2H5    | turquoise | -0.02198 | 0.915144 | ARID2    | turquoise | 0.1151467   | 0.567378921  | TCEA1     | yellow | -0.3255  | 0.104668 |
| FTO       | turquoise | -0.02187 | 0.915552 | VMA21    | turquoise | 0.116646395 | 0.562308651  | RPL5      | yellow | -0.32479 | 0.10547  |
| AMPD2     | turquoise | -0.02177 | 0.915924 | NCLN     | turquoise | 0.11675162  | 0.56195367   | CHAMP1    | yellow | -0.32376 | 0.10664  |
| HCK       | turquoise | 0.021656 | 0.916371 | FGFR1OP2 | turquoise | 0.118282676 | 0.556800147  | MGAT5     | yellow | -0.32257 | 0.108016 |
| UNK       | turquoise | 0.021515 | 0.916913 | ALCAM    | turquoise | 0.118540435 | 0.555934665  | DHX57     | yellow | -0.3224  | 0.108205 |
| SLC25A35  | turquoise | 0.021464 | 0.917112 | SPSB1    | turquoise | 0.118641739 | 0.555594683  | RPL13AP2C | yellow | -0.32156 | 0.109183 |
| CFD       | turquoise | 0.021211 | 0.91843  | DBR1     | turquoise | 0.119097739 | 0.554065504  | STUB1     | yellow | -0.32024 | 0.110728 |
| ARPC5     | turquoise | 0.020919 | 0.91921  | MRPL21   | turquoise | 0.119544271 | 0.552569949  | SNORA48   | yellow | -0.32016 | 0.110827 |
| VAMP8     | turquoise | -0.02071 | 0.92001  | TCIRG1   | turquoise | 0.119606706 | 0.552360984  | PLEKH11   | yellow | -0.31985 | 0.111184 |
| FMNL2     | turquoise | 0.020636 | 0.920296 | GNA13    | turquoise | 0.120026239 | 0.550957798  | RASSF3    | yellow | -0.31937 | 0.11175  |
| CAP1      | turquoise | -0.02064 | 0.920297 | TXNL1    | turquoise | 0.120396355 | 0.549721262  | BRPF1     | yellow | -0.31833 | 0.112994 |
| SEMA3C    | turquoise | 0.020522 | 0.920735 | KIAA0930 | turquoise | 0.121591258 | 0.545737945  | SLC35B2   | yellow | -0.31793 | 0.113468 |
| TRRAP     | turquoise | 0.020433 | 0.921079 | TSP0     | turquoise | 0.121805173 | 0.545026263  | RPS9      | yellow | -0.31767 | 0.113786 |
| C11orf58  | turquoise | 0.020344 | 0.921421 | HDAC5    | turquoise | 0.122719787 | 0.541988276  | VPRBP     | yellow | -0.31767 | 0.113787 |
| EIF2AK2   | turquoise | -0.02032 | 0.921498 | SNX17    | turquoise | 0.123442397 | 0.539593677  | THOC3     | yellow | -0.31717 | 0.11438  |
| GPR89C    | turquoise | -0.02027 | 0.921705 | YWHAH    | turquoise | 0.124762599 | 0.535231642  | MIDN      | yellow | -0.31663 | 0.115031 |
| DAB2      | turquoise | -0.02023 | 0.921851 | PTTG1IP  | turquoise | 0.125965053 | 0.531273233  | RPS14     | yellow | -0.31621 | 0.115548 |
| SMCHD1    | turquoise | 0.020228 | 0.92187  | GPR153   | turquoise | 0.126206485 | 0.530480134  | TPD52     | yellow | -0.31614 | 0.115628 |
| EIF253    | turquoise | -0.0202  | 0.921963 | SMPD4    | turquoise | 0.126654218 | 0.52901084   | TMEM106F  | yellow | -0.31581 | 0.116034 |
| TNF       | turquoise | 0.019776 | 0.923608 | SEPH52   | turquoise | 0.126751523 | 0.52869178   | RNP51     | yellow | -0.31469 | 0.117402 |
| SYVN1     | turquoise | 0.01974  | 0.923747 | MLPH     | turquoise | 0.126907336 | 0.52818106   | SETD9     | yellow | -0.31463 | 0.117474 |
| THBS1     | turquoise | -0.01969 | 0.923955 | PATL1    | turquoise | 0.126957573 | 0.528016448  | TM6IM6    | yellow | -0.31433 | 0.11784  |
| PLCG2     | turquoise | 0.019269 | 0.925564 | YAE101   | turquoise | 0.127122552 | 0.527476024  | MCRS1     | yellow | -0.31419 | 0.118021 |
| AMFR      | turquoise | -0.01887 | 0.927094 | TREM2    | turquoise | 0.128017614 | 0.524548682  | RHOA      | yellow | -0.31218 | 0.12052  |
| SUGP1     | turquoise | 0.018557 | 0.928306 | PUS3     | turquoise | 0.12812501  | 0.524197963  | ACP2      | yellow | -0.31216 | 0.120541 |
| MED8      | turquoise | -0.01853 | 0.928401 | ORAOV1   | turquoise | 0.128486175 | 0.523019353  | GLRX      | yellow | -0.31107 | 0.121905 |
| RAP1B     | turquoise | 0.018401 | 0.928905 | RBMS2    | turquoise | 0.128523006 | 0.522899232  | PPP1R35   | yellow | -0.31085 | 0.122182 |
| ATG12     | turquoise | 0.018356 | 0.929082 | UGGT1    | turquoise | 0.128559939 | 0.522778792  | COP55     | yellow | -0.30972 | 0.123628 |
| NUDT19    | turquoise | -0.01818 | 0.929761 | ZNF589   | turquoise | 0.129654032 | 0.51921698   | GID8      | yellow | -0.30884 | 0.124746 |
| RPL22     | turquoise | 0.018161 | 0.929834 | TBC1D20  | turquoise | 0.129839955 | 0.518612879  | ERLIN2    | yellow | -0.30879 | 0.124818 |
| HEATR5A   | turquoise | 0.018009 | 0.930417 | FKTN     | turquoise | 0.12992672  | 0.51833108   | TMEM230   | yellow | -0.30821 | 0.125558 |
| PJA2      | turquoise | -0.01793 | 0.930729 | RAB31P   | turquoise | 0.12993254  | 0.51831218   | XRN2      | yellow | -0.30818 | 0.125603 |
| MST4      | turquoise | 0.017879 | 0.93092  | HSF1     | turquoise | 0.130141821 | 0.517632784  | CALHM2    | yellow | -0.30792 | 0.125931 |
| FER       | turquoise | -0.01787 | 0.930971 | OSBP1L   | turquoise | 0.132477544 | 0.510079728  | ARMCX3    | yellow | -0.30744 | 0.126562 |
| NCDN      | turquoise | -0.01783 | 0.931121 | TSR2     | turquoise | 0.132809848 | 0.50900957   | LRR1      | yellow | -0.30723 | 0.126834 |
| ASH1L-AS1 | turquoise | 0.017603 | 0.931984 | PHF6     | turquoise | 0.132850325 | 0.508879292  | COX8A     | yellow | -0.30693 | 0.12722  |
| MRPL33    | turquoise | -0.0176  | 0.932005 | ZADH2    | turquoise | 0.133064164 | 0.508191311  | HP54      | yellow | -0.306   | 0.128439 |
| IPO4      | turquoise | 0.017334 | 0.933021 | MED13    | turquoise | 0.13312384  | 0.507999398  | EMD       | yellow | -0.30494 | 0.129831 |
| MFAP1     | turquoise | 0.017262 | 0.933299 | RCC1     | turquoise | 0.133460541 | 0.506917265  | ANPEP     | yellow | -0.30475 | 0.130088 |
| LMBRD2    | turquoise | -0.01724 | 0.9334   | HSD17B4  | turquoise | 0.134071195 | 0.50495515   | PSMCS5    | yellow | -0.30423 | 0.130774 |
| H6PD      | turquoise | -0.01721 | 0.933504 | CCDC66   | turquoise | 0.134972129 | 0.502073177  | H2AFY     | yellow | -0.30222 | 0.133465 |
| CNT2      | turquoise | -0.01718 | 0.933615 | LRWD1    | turquoise | 0.13515746  | 0.501480847  | POLR13    | yellow | -0.30186 | 0.133944 |
| TBCA      | turquoise | -0.01699 | 0.934356 | C19orf25 | turquoise | 0.136237307 | 0.498036495  | ALG12     | yellow | -0.30164 | 0.134255 |
| LILRB2    | turquoise | -0.01689 | 0.934743 | PQLC1    | turquoise | 0.136550665 | 0.497039204  | FBXW8     | yellow | -0.30149 | 0.134458 |
| CD58      | turquoise | -0.01684 | 0.934926 | ADNP2    | turquoise | 0.136729142 | 0.496471633  | POLX1     | yellow | -0.30128 | 0.134731 |
| SIPA1L2   | turquoise | -0.01657 | 0.935967 | TM9SF3   | turquoise | 0.136860715 | 0.496053427  | POLR1D    | yellow | -0.30128 | 0.134737 |
| HOMER1    | turquoise | -0.01642 | 0.936552 | PAP5S1   | turquoise | 0.137619727 | 0.493644348  | MFAP5     | yellow | -0.30014 | 0.136294 |
| COP52     | turquoise | 0.016239 | 0.937243 | PTPLA    | turquoise | 0.137769514 | 0.493169623  | USP46     | yellow | -0.29994 | 0.136561 |
| PLAU      | turquoise | 0.015958 | 0.938326 | BLMH     | turquoise | 0.138203926 | 0.491794132  | UNC13D    | yellow | -0.29978 | 0.136789 |
| PPP2R1B   | turquoise | 0.015678 | 0.939407 | CD58     | turquoise | 0.139339441 | 0.488207863  | ACTL6A    | yellow | -0.2985  | 0.138555 |
| RABGAP1L  | turquoise | -0.01557 | 0.939806 | TMEM62   | turquoise | 0.139509943 | 0.487670514  | ACYP2     | yellow | -0.29824 | 0.138908 |
| TAF9      | turquoise | -0.01556 | 0.939862 | IKZF2    | turquoise | 0.139572641 | 0.487472993  | C6orf57   | yellow | -0.29777 | 0.139567 |
| CD74      | turquoise | 0.015443 | 0.940312 | PLAU     | turquoise | 0.141915744 | 0.480120548  | FAM168A   | yellow | -0.29739 | 0.140092 |
| EIF5      | turquoise | -0.01543 | 0.940353 | TSNARE1  | turquoise | 0.142538174 | 0.478177005  | RPL12     | yellow | -0.297   | 0.14064  |
| PHC2      | turquoise | 0.014982 | 0.942091 | BLCL1    | turquoise | 0.143015683 | 0.476688722  | CD68      | yellow | -0.29637 | 0.141531 |
| STK38L    | turquoise | -0.01494 | 0.942259 | LZTS2    | turquoise | 0.143300676 | 0.4758016    | ATP1B1    | yellow | -0.29549 | 0.142772 |
| TLN1      | turquoise | 0.014923 | 0.942321 | STBD1    | turquoise | 0.143956216 | 0.473764278  | C8orf33   | yellow | -0.29537 | 0.14293  |
| CEP85L    | turquoise | -0.01488 | 0.94247  | KIAA1429 | turquoise | 0.14507038  | 0.470311971  | ARSA      | yellow | -0.29348 | 0.145633 |
| PPM1G     | turquoise | -0.01488 | 0.942497 | RAB6A    | turquoise | 0.145497832 | 0.468990956  | TRIM47    | yellow | -0.29215 | 0.147557 |
| MFAP3     | turquoise | -0.0148  | 0.942807 | OTUD5    | turquoise | 0.145998209 | 0.467447018  | ATG9A     | yellow | -0.29207 | 0.147676 |
| UBE2V1    | turquoise | -0.01469 | 0.943222 | CFDP1    | turquoise | 0.146129535 | 0.467042244  | C12orf52  | yellow | -0.29108 | 0.149111 |
| ANAPC7    | turquoise | 0.014638 | 0.943418 | LMLN     | turquoise | 0.146873739 | 0.464751904  | KCNQ1     | yellow | -0.29093 | 0.149335 |
| XBP1      | turquoise | -0.01445 | 0.944137 | C7orf60  | turquoise | 0.147774995 | 0.461986096  | COPA      | yellow | -0.29053 | 0.149908 |
| REPS1     | turquoise | 0.01432  | 0.944648 | YEATS2   | turquoise | 0.148862175 | 0.45866123   | HIST1H4B  | yellow | -0.28975 | 0.151068 |
| FARSA     | turquoise | -0.01422 | 0.945037 | G6PD     | turquoise | 0.149288427 | 0.457361089  | CTTNBP2N1 | yellow | -0.28925 | 0.151799 |
| ATAD2B    | turquoise | -0.01417 | 0.945223 | GATC     | turquoise | 0.149924069 | 0.455425885  | MSANTD4   | yellow | -0.28851 | 0.152903 |
| RAB10     | turquoise | -0.01395 | 0.94607  | EHPD2    | turquoise | 0.150124455 | 0.454816712  | TCF3      | yellow | -0.28815 | 0.153439 |
| SGK3      | turquoise | 0.013951 | 0.946072 | MAPKAPK3 | turquoise | 0.150734959 | 0.452963438  | ZNF649    | yellow | -0.28716 | 0.154922 |
| VKORC1L1  | turquoise | 0.013562 | 0.947573 | SLC35B3  | turquoise | 0.150837296 | 0.45265317   | ATXN2     | yellow | -0.28539 | 0.157591 |
| CYP3A5    | turquoise | 0.013509 | 0.947778 | TJP2     | turquoise | 0.150903287 | 0.452453158  | COL8A2    | yellow | -0.28485 | 0.158414 |
| SEC31A    | turquoise | -0.01326 | 0.94874  | ATF6B    | turquoise | 0.151252922 | 0.451394228  | GTF3C5    | yellow | -0.28418 | 0.159427 |
| ZNF319    | turquoise | 0.01319  | 0.949011 | SMCS5    | turquoise | 0.152008928 | 0.449109039  | RNF170    | yellow | -0.28343 | 0.16058  |
| CDC42EP1  | turquoise | 0.013158 | 0.949133 | AKAP17A  | turquoise | 0.15208271  | 0.448886349  | SNAPC4    | yellow | -0.28284 | 0.161495 |
| ITPR2     | turquoise | -0.01314 | 0.949203 | IRF5     | turquoise | 0.152948145 | 0.446278659  | IRF8      | yellow | -0.28246 | 0.162089 |
| ZNF274    | turquoise | -0.01302 | 0.949673 | AMFR     | turquoise | 0.155125984 | 0.439752454  | LMNB2     | yellow | -0.28233 | 0.162293 |
| CEP104    | turquoise | 0.013015 | 0.949684 | MAGOH    | turquoise | 0.155245336 | 0.4399396293 | TTI1      | yellow | -0.28145 | 0.163657 |
| SH3YL1    | turquoise | 0.01267  | 0.951017 | MGAT4A   | turquoise | 0.155551991 | 0.438481905  | ARPC1A    | yellow | -0.28111 | 0.164187 |
| COG7      | turquoise | 0.012546 | 0.951497 | DHR53    | turquoise | 0.155776177 | 0.437814077  | SLC38A9   | yellow | -0.28041 | 0.165285 |
| UBE2Q1    | turquoise | -0.01247 | 0.951786 | RNF121   | turquoise | 0.156178197 | 0.436617287  | MRPL35    | yellow | -0.28002 | 0.165891 |
| DAZAP1    | turquoise | -0.01191 | 0.953949 | NSUN2    | turquoise | 0.156364123 | 0.436065249  | STRN      | yellow | -0.2791  | 0.167352 |
| SLC39A8   | turquoise | -0.01167 | 0.954888 | FRA10AC1 | turquoise | 0.156851736 | 0.434617773  | TMUB1     | yellow | -0.2785  | 0.168305 |
| TRMT11    | turquoise | -0.01164 | 0.954992 | PSMD9    | turquoise | 0.158378771 | 0.430101497  | PITHD1    | yellow | -0.27734 | 0.170159 |
| DLST      | turquoise | -0.01159 | 0.955177 | SUN1     | turquoise | 0.159590431 | 0.42653627   | FAM109A   | yellow | -0.27593 | 0.172435 |
| CNKN      | turquoise | -0.01125 | 0        |          |           |             |              |           |        |          |          |

Table 6. Gene module membership and correlation with growth rate (48/72h), with adjusted p values for each module

|            |           |          |          |          |           |             |             |          |        |          |          |
|------------|-----------|----------|----------|----------|-----------|-------------|-------------|----------|--------|----------|----------|
| DPYD       | turquoise | -0.01042 | 0.959703 | MOSPD1   | turquoise | 0.16474675  | 0.411546344 | PLEKHM2  | yellow | -0.27142 | 0.179842 |
| SSX2IP     | turquoise | -0.01038 | 0.959867 | GBA      | turquoise | 0.165384847 | 0.409711979 | LBX2-AS1 | yellow | -0.27123 | 0.180158 |
| CSNK2B     | turquoise | 0.009727 | 0.962387 | UNC50    | turquoise | 0.167993946 | 0.402259126 | POLE4    | yellow | -0.27101 | 0.180525 |
| DYNC1L1    | turquoise | 0.009396 | 0.963665 | TMED1    | turquoise | 0.168351932 | 0.401242535 | HACL1    | yellow | -0.27028 | 0.181746 |
| KFPZ586I14 | turquoise | 0.009349 | 0.963847 | HDAC10   | turquoise | 0.168939311 | 0.401125121 | METTL7   | yellow | -0.27016 | 0.181941 |
| STRN3      | turquoise | -0.00921 | 0.964403 | CD99L2   | turquoise | 0.168912082 | 0.399654756 | CCDC137  | yellow | -0.26816 | 0.185324 |
| ZBTB41     | turquoise | -0.00913 | 0.96468  | E1F3H    | turquoise | 0.168935619 | 0.399588115 | TTC5     | yellow | -0.26784 | 0.185874 |
| ARHGAP21   | turquoise | -0.00909 | 0.964849 | EXOSC7   | turquoise | 0.169521148 | 0.397932354 | DNAJC14  | yellow | -0.26781 | 0.18593  |
| PPP3R1     | turquoise | 0.009039 | 0.965046 | PDE4A    | turquoise | 0.169590104 | 0.397737616 | POLR3C   | yellow | -0.26742 | 0.186597 |
| ZNFR80     | turquoise | 0.008622 | 0.966658 | SH3BP1   | turquoise | 0.169804926 | 0.397131282 | NUP88    | yellow | -0.26631 | 0.188505 |
| CSK        | turquoise | 0.007848 | 0.969648 | NOP58    | turquoise | 0.170579561 | 0.394949233 | NR2F6    | yellow | -0.26484 | 0.191035 |
| CHM        | turquoise | -0.00784 | 0.969668 | RAB43    | turquoise | 0.170758164 | 0.394447098 | RPUSD4   | yellow | -0.26475 | 0.191205 |
| LDLRAP1    | turquoise | -0.00776 | 0.970004 | ZMI21    | turquoise | 0.172744936 | 0.38888586  | TTC12    | yellow | -0.26439 | 0.191821 |
| RASGRP3    | turquoise | -0.00773 | 0.970116 | KIAA1737 | turquoise | 0.173353643 | 0.387191018 | FGD2     | yellow | -0.26355 | 0.193291 |
| TMEM184E   | turquoise | 0.007665 | 0.970355 | MRPL40   | turquoise | 0.173678118 | 0.386289303 | FAM50A   | yellow | -0.26308 | 0.194125 |
| DESI1      | turquoise | 0.007649 | 0.970417 | TAZ      | turquoise | 0.174928737 | 0.382825106 | LDHD     | yellow | -0.26294 | 0.194369 |
| ARL1       | turquoise | 0.007533 | 0.970865 | NUDT21   | turquoise | 0.175327389 | 0.381724613 | KLHL36   | yellow | -0.26246 | 0.195204 |
| GRP180     | turquoise | 0.007501 | 0.97099  | CWC22    | turquoise | 0.175774146 | 0.380493494 | LRPAP1   | yellow | -0.262   | 0.196019 |
| CLCN3      | turquoise | 0.007413 | 0.971331 | H1BCH    | turquoise | 0.176463158 | 0.378599289 | SRD5A1   | yellow | -0.26176 | 0.196442 |
| H1BCH      | turquoise | 0.006952 | 0.973114 | MID2     | turquoise | 0.177509167 | 0.37573408  | RPUSD3   | yellow | -0.26152 | 0.196878 |
| BCL2L1     | turquoise | -0.00685 | 0.973503 | FMNL3    | turquoise | 0.178058481 | 0.374234457 | ZFP90    | yellow | -0.26108 | 0.197659 |
| PILRA      | turquoise | 0.006789 | 0.973744 | SLC33A1  | turquoise | 0.181468819 | 0.365002251 | UBXN11   | yellow | -0.26076 | 0.198217 |
| SP1RE1     | turquoise | 0.006715 | 0.974027 | PJA2     | turquoise | 0.182430603 | 0.362422937 | IRAK1    | yellow | -0.2606  | 0.198504 |
| EZF3       | turquoise | 0.006574 | 0.974573 | C4orf52  | turquoise | 0.18360476  | 0.359288647 | DHR57B   | yellow | -0.26055 | 0.198592 |
| USP37      | turquoise | 0.00633  | 0.975519 | PPP1R16A | turquoise | 0.184733446 | 0.35629086  | TFPT     | yellow | -0.26044 | 0.198799 |
| MGAT4A     | turquoise | 0.006242 | 0.975858 | ACOT2    | turquoise | 0.185103799 | 0.355310439 | PUF60    | yellow | -0.25979 | 0.199967 |
| EDC4       | turquoise | 0.006126 | 0.976305 | USP48    | turquoise | 0.185396531 | 0.35453663  | NBD1     | yellow | -0.25959 | 0.200327 |
| TRIM44     | turquoise | -0.00609 | 0.976439 | FCHSD1   | turquoise | 0.186978315 | 0.350372648 | ZBTB49   | yellow | -0.25954 | 0.200417 |
| SLC9B2     | turquoise | 0.006019 | 0.976719 | TBCK     | turquoise | 0.187351563 | 0.349394352 | SNORA24  | yellow | -0.2579  | 0.203369 |
| ARFGF1     | turquoise | 0.005925 | 0.977082 | MTMR10   | turquoise | 0.187440074 | 0.349162598 | APS21    | yellow | -0.25626 | 0.206368 |
| CCDC41     | turquoise | 0.005901 | 0.977176 | ALYREF   | turquoise | 0.188050869 | 0.347565828 | UST      | yellow | -0.25618 | 0.206509 |
| SMEK1      | turquoise | -0.00581 | 0.977547 | DAB2     | turquoise | 0.18887712  | 0.345412754 | RIPK3    | yellow | -0.25614 | 0.206586 |
| SLC35A4    | turquoise | 0.005801 | 0.977562 | ATPAF2   | turquoise | 0.190334278 | 0.341635136 | ZNF689   | yellow | -0.25607 | 0.206703 |
| NME7       | turquoise | -0.00575 | 0.977759 | DCP1B    | turquoise | 0.19122513  | 0.339344648 | CS       | yellow | -0.2559  | 0.207017 |
| GPANK1     | turquoise | 0.005655 | 0.978126 | DBNL     | turquoise | 0.191796792 | 0.337868693 | SIVA1    | yellow | -0.25585 | 0.207105 |
| UZSURP     | turquoise | 0.00558  | 0.978419 | SSSCA1   | turquoise | 0.192354108 | 0.336440038 | SNX12    | yellow | -0.25516 | 0.20839  |
| DMC1       | turquoise | 0.005409 | 0.979077 | SDHAF2   | turquoise | 0.192657219 | 0.335664561 | NAGPA    | yellow | -0.25345 | 0.211558 |
| PHACTR1    | turquoise | -0.0053  | 0.979497 | INO80B   | turquoise | 0.19457923  | 0.33077247  | AKAP1    | yellow | -0.25325 | 0.211918 |
| TAF1A      | turquoise | 0.005151 | 0.980075 | STAR33NL | turquoise | 0.195479865 | 0.328495063 | TRMT10C  | yellow | -0.25245 | 0.213423 |
| DYM        | turquoise | 0.004619 | 0.982132 | CCDC71   | turquoise | 0.196606671 | 0.326569218 | PRKCD    | yellow | -0.25228 | 0.213746 |
| NUP153     | turquoise | 0.004223 | 0.983666 | FKBP3    | turquoise | 0.197095779 | 0.32443294  | ANKRD32  | yellow | -0.25101 | 0.216142 |
| AVP1       | turquoise | 0.004045 | 0.984354 | RPIA     | turquoise | 0.198388358 | 0.321205823 | CXCL2    | yellow | -0.2497  | 0.218615 |
| FAM208B    | turquoise | -0.00385 | 0.98512  | CNTRL    | turquoise | 0.198478504 | 0.320981498 | STAR33   | yellow | -0.24811 | 0.221671 |
| RPS23      | turquoise | 0.003574 | 0.986176 | SPR      | turquoise | 0.19867031  | 0.320504514 | KAT8     | yellow | -0.24797 | 0.221928 |
| DCTD       | turquoise | 0.003524 | 0.98637  | LIN7C    | turquoise | 0.199166303 | 0.319273091 | SOX4     | yellow | -0.24731 | 0.222206 |
| NEDD4      | turquoise | 0.003445 | 0.986674 | PPAP2A   | turquoise | 0.199209187 | 0.319166756 | NARS2    | yellow | -0.24629 | 0.225188 |
| TIMP2      | turquoise | 0.003419 | 0.986774 | FAM73B   | turquoise | 0.20089468  | 0.315004718 | CDK11B   | yellow | -0.24468 | 0.228325 |
| CLK4       | turquoise | 0.002872 | 0.988889 | CHFR     | turquoise | 0.2009255   | 0.314928924 | ZNF470   | yellow | -0.24307 | 0.231503 |
| ZFAN1      | turquoise | -0.00278 | 0.989261 | PFKL     | turquoise | 0.20127134  | 0.314079217 | USB1     | yellow | -0.24212 | 0.233389 |
| PABPC3     | turquoise | -0.00233 | 0.990975 | ZNF674   | turquoise | 0.204616653 | 0.305933142 | STAC3    | yellow | -0.24164 | 0.234345 |
| UBQLN1     | turquoise | 0.001875 | 0.992746 | THOP1    | turquoise | 0.204904746 | 0.305237822 | ASAH1    | yellow | -0.24086 | 0.2359   |
| SLC30A7    | turquoise | 0.001695 | 0.993445 | CAP1     | turquoise | 0.204914084 | 0.3052153   | ARHGFE40 | yellow | -0.24073 | 0.236163 |
| JAK2       | turquoise | 0.00161  | 0.993773 | C2orf29  | turquoise | 0.204921274 | 0.305197959 | ERAP1    | yellow | -0.2406  | 0.236426 |
| ATAD1      | turquoise | 0.001569 | 0.993932 | CCDC94   | turquoise | 0.206203518 | 0.302115425 | TMEM173  | yellow | -0.24003 | 0.237574 |
| LINC00597  | turquoise | 0.001421 | 0.994503 | SAT2     | turquoise | 0.206892957 | 0.300466071 | PMPCB    | yellow | -0.23989 | 0.237843 |
| GNAI3      | turquoise | 0.001346 | 0.994795 | KLF3     | turquoise | 0.207314726 | 0.299459848 | PRDM10   | yellow | -0.23884 | 0.23998  |
| RAB5A      | turquoise | -0.00093 | 0.996405 | PKD1L1   | turquoise | 0.207764236 | 0.298389769 | PARL     | yellow | -0.23718 | 0.243343 |
| UBD        | turquoise | 0.000518 | 0.997995 | TPAN33   | turquoise | 0.209212367 | 0.294958746 | TRADD    | yellow | -0.23664 | 0.244468 |
| RNF144B    | turquoise | -0.00048 | 0.998138 | HHEX     | turquoise | 0.210274123 | 0.292458981 | CSR2P2B  | yellow | -0.23663 | 0.244488 |
| ENGASE     | turquoise | -0.00042 | 0.99836  | MYL12B   | turquoise | 0.211875541 | 0.288713988 | PTGR1    | yellow | -0.23629 | 0.245174 |
| NCK1PSD    | turquoise | 0.000276 | 0.998931 | ASB1     | turquoise | 0.212002971 | 0.288417295 | RNH1     | yellow | -0.23616 | 0.245449 |
| TM9SF3     | turquoise | -5.7E-06 | 0.999978 | GABPA    | turquoise | 0.213279338 | 0.285456205 | MLXIP    | yellow | -0.23539 | 0.247034 |
| SNORA24    | white     | -0.33297 | 0.096482 | CD83     | turquoise | 0.213338531 | 0.285319351 | GGT7     | yellow | -0.23537 | 0.24707  |
| SNORASC    | white     | -0.27475 | 0.174348 | NBEAL1   | turquoise | 0.213388312 | 0.285204291 | BCL11A   | yellow | -0.23484 | 0.248167 |
| ACIN1      | white     | -0.22487 | 0.269403 | C6orf228 | turquoise | 0.214751586 | 0.282064728 | SP1      | yellow | -0.23471 | 0.248445 |
| TUBG1      | white     | -0.2248  | 0.269557 | PUS1L    | turquoise | 0.21524191  | 0.280940936 | PRR12    | yellow | -0.23407 | 0.249777 |
| MFF        | white     | -0.20768 | 0.308649 | GDI2     | turquoise | 0.215413312 | 0.280548764 | FUK      | yellow | -0.23353 | 0.250888 |
| SNORA23    | white     | -0.20633 | 0.311891 | PTPN23   | turquoise | 0.215612502 | 0.280093455 | SLC39A3  | yellow | -0.23311 | 0.251784 |
| SNORA9     | white     | -0.19612 | 0.33696  | C9orf91  | turquoise | 0.216079517 | 0.279027795 | TAF4     | yellow | -0.23231 | 0.253458 |
| TMEM99     | white     | -0.19188 | 0.347718 | SF3A1    | turquoise | 0.217032372 | 0.276861559 | BEST1    | yellow | -0.23131 | 0.25556  |
| SNORA57    | white     | -0.18089 | 0.376515 | TMCC1    | turquoise | 0.218702975 | 0.273089611 | IPGK1    | yellow | -0.23052 | 0.257221 |
| SNOR17     | white     | -0.17502 | 0.392446 | LPCAT2   | turquoise | 0.218956209 | 0.272520745 | ENTPD6   | yellow | -0.23034 | 0.257617 |
| RBMX       | white     | 0.174318 | 0.394388 | CYP51A1  | turquoise | 0.220585301 | 0.268879338 | PPM1B    | yellow | -0.22872 | 0.261076 |
| SNORA52    | white     | -0.17383 | 0.395732 | KIAA1009 | turquoise | 0.222303016 | 0.265073956 | TFEB     | yellow | -0.22593 | 0.267089 |
| SNORA2A    | white     | -0.16715 | 0.414415 | ZBTB9    | turquoise | 0.222313535 | 0.265050759 | PEX26    | yellow | -0.22515 | 0.268783 |
| ELAC1      | white     | -0.13748 | 0.503024 | C3orf14  | turquoise | 0.223750242 | 0.261894973 | CHCHD10  | yellow | -0.22492 | 0.269296 |
| SNORA65    | white     | -0.13552 | 0.509194 | FRMD8    | turquoise | 0.224165723 | 0.260986913 | FBXL19   | yellow | -0.22446 | 0.270308 |
| HHLA3      | white     | -0.12951 | 0.528339 | PARP15   | turquoise | 0.226393969 | 0.256515836 | BID      | yellow | -0.22359 | 0.272205 |
| SNORA62    | white     | -0.12662 | 0.537649 | GDF15    | turquoise | 0.226503596 | 0.255915473 | CISD3    | yellow | -0.22358 | 0.272234 |
| SNORA5A    | white     | -0.11627 | 0.571661 | UBTD1    | turquoise | 0.226756202 | 0.25537138  | HENMT1   | yellow | -0.22357 | 0.272242 |
| SNORA74A   | white     | -0.11181 | 0.586599 | ISG20L2  | turquoise | 0.230114124 | 0.248210388 | QARS     | yellow | -0.22198 | 0.275755 |
| SNORA71D   | white     | -0.10779 | 0.600179 | CALCOCO1 | turquoise | 0.230208069 | 0.248011958 | MARK4    | yellow | -0.22175 | 0.276283 |
| CD2AP      | white     | -0.10475 | 0.610573 | ADRBK1   | turquoise | 0.230494539 | 0.247407528 | TUFM     | yellow | -0.22173 | 0.27633  |
| KIDINS220  | white     | 0.090939 | 0.658626 | WWC2     | turquoise | 0.239911493 | 0.228076294 | NOY1     | yellow | -0.2217  | 0.276396 |
| SNORA6     | white     | -0.08646 | 0.674525 | SEC24B   | turquoise | 0.240436359 | 0.227029456 | DIPET2   | yellow | -0.22143 | 0.276988 |
| SNORA71C   | white     | 0.085939 | 0.676364 | RUVBL2   | turquoise | 0.241159098 | 0.22559323  | SQLC     | yellow | -0.22075 | 0.278502 |
| ZBTB11     | white     | -0.06992 | 0.734313 | LCORL    | turquoise | 0.241710165 | 0.224502252 | SLC2A9   | yellow | -0.21971 | 0.280831 |
| SNORA48    | white     | -0.06627 | 0.747702 | CRLS1    | turquoise | 0.241955298 | 0.224018085 | USP22    | yellow | -0.21839 | 0.283806 |
| NOA1       | white     | -0.05995 | 0.771102 | RPL26    | turquoise | 0.242438884 | 0.223065005 | SGK19E   | yellow | -0.21762 | 0.285541 |
| SNORA46    | white     | -0.05878 | 0.775478 | E1F1B    | turquoise | 0.246907972 | 0.214385854 | PRRC2A   | yellow | -0.21725 | 0.28638  |
| USP47      | white     | 0.055894 | 0.786236 | PIK3R5   | turquoise | 0.247851063 | 0.212583955 | PPP1R26  | yellow | -0.21639 | 0.288337 |
| SNORD15B   | white     | 0.036421 | 0.859795 | MPV17    | turquoise | 0.247905453 | 0.212480349 | NF1      | yellow | -0.21628 | 0.288587 |
| SNORA16A   | white     | 0.035046 | 0.865039 | FOXO3    | turquoise | 0.248319439 | 0.211692886 | INTS8    | yellow | -0.21591 | 0.289443 |
| SNORA71B   | white     | -0.0     |          |          |           |             |             |          |        |          |          |

Table 6. Gene module membership and correlation with growth rate (48/72h), with adjusted p values for each module

|           |        |          |          |           |           |              |             |            |        |          |          |
|-----------|--------|----------|----------|-----------|-----------|--------------|-------------|------------|--------|----------|----------|
| ZNF564    | yellow | -0.51781 | 0.006739 | NOL12     | turquoise | 0.26514924   | 0.181342457 | CMAHP      | yellow | -0.20927 | 0.304894 |
| ZFP90     | yellow | -0.51287 | 0.00738  | EDEM3     | turquoise | 0.267594007  | 0.177200207 | WDR830S    | yellow | -0.2073  | 0.309565 |
| HNRNP3A3  | yellow | -0.44919 | 0.021334 | DCAF10    | turquoise | 0.268885962  | 0.175038124 | CAMTA2     | yellow | -0.20709 | 0.310062 |
| TSNARE1   | yellow | 0.437112 | 0.025555 | UQCRCF51  | turquoise | 0.270884597  | 0.17172992  | GON4L      | yellow | -0.20646 | 0.311577 |
| TSFM      | yellow | -0.43509 | 0.026322 | DUSP3     | turquoise | 0.271176198  | 0.171250949 | MRAS       | yellow | -0.20627 | 0.312019 |
| CRELD2    | yellow | 0.427053 | 0.029564 | USP32     | turquoise | 0.27163236   | 0.170503561 | LAMP1      | yellow | -0.20584 | 0.31307  |
| LRRC1     | yellow | -0.41349 | 0.035755 | PLEKH82   | turquoise | 0.273898195  | 0.166825138 | HERPUD1    | yellow | -0.20582 | 0.313119 |
| JAGN1     | yellow | -0.40006 | 0.042863 | CCM2      | turquoise | 0.277414537  | 0.161228019 | PHRF1      | yellow | -0.205   | 0.315079 |
| KDEL1     | yellow | 0.39956  | 0.043146 | SPINT2    | turquoise | 0.27851725   | 0.159500526 | TBP        | yellow | -0.20463 | 0.315981 |
| SEC61A1   | yellow | 0.39119  | 0.048139 | CND8P1    | turquoise | 0.280679505  | 0.156151388 | PPP1R11    | yellow | -0.20449 | 0.31632  |
| SLC39A6   | yellow | -0.38983 | 0.048992 | KRT79     | turquoise | 0.282069772  | 0.154024612 | CEBPG      | yellow | -0.20325 | 0.319328 |
| CSNK2A2   | yellow | 0.386725 | 0.050981 | LHFPL2    | turquoise | 0.284944189  | 0.149693111 | PFAS       | yellow | -0.20301 | 0.319913 |
| C14orf169 | yellow | 0.386101 | 0.051389 | CEACAM21  | turquoise | 0.285146058  | 0.149392223 | MED15      | yellow | -0.20294 | 0.32007  |
| BLOC153   | yellow | 0.385783 | 0.051598 | CSNK2B    | turquoise | 0.286667289  | 0.147138736 | FHOD1      | yellow | -0.20279 | 0.320452 |
| CCDC75    | yellow | -0.38383 | 0.052894 | SUV39H2   | turquoise | 0.287483058  | 0.145940385 | PLCG1      | yellow | -0.2016  | 0.323343 |
| GP2       | yellow | 0.380189 | 0.055378 | BNIP3L    | turquoise | 0.287595235  | 0.14577615  | MED1       | yellow | -0.20075 | 0.325437 |
| LENG9     | yellow | 0.379791 | 0.055655 | FXC1      | turquoise | 0.288125131  | 0.145002133 | GF2FH4     | yellow | -0.19997 | 0.327366 |
| KLHL12    | yellow | -0.37622 | 0.058185 | NDUFA4    | turquoise | 0.292904088  | 0.138154595 | NENF       | yellow | -0.19956 | 0.328366 |
| POLK      | yellow | -0.37228 | 0.06109  | BCKDK     | turquoise | 0.298786937  | 0.130050294 | SGSH       | yellow | -0.19949 | 0.32855  |
| FARS2     | yellow | -0.36826 | 0.064156 | MRFAP11L  | turquoise | 0.298909261  | 0.129885538 | C16orf72   | yellow | -0.19939 | 0.328796 |
| PHIP      | yellow | -0.36696 | 0.065178 | GPR108    | turquoise | 0.300541964  | 0.127701018 | SLC16A5    | yellow | -0.19927 | 0.329087 |
| CCDC9     | yellow | 0.363894 | 0.067628 | PPAT      | turquoise | 0.301957442  | 0.125828946 | C4orf48    | yellow | -0.19758 | 0.333286 |
| ITGB7     | yellow | -0.35965 | 0.071133 | ATP6V1D   | turquoise | 0.305927762  | 0.120685044 | TMC8       | yellow | -0.19679 | 0.335281 |
| PPP2R3A   | yellow | -0.35922 | 0.071497 | ENY2      | turquoise | 0.308162902  | 0.117858059 | ITPA       | yellow | -0.19678 | 0.335297 |
| CPPE21    | yellow | -0.35614 | 0.074145 | RIT1      | turquoise | 0.311471861  | 0.113762852 | ZDHHHC13   | yellow | -0.19647 | 0.336079 |
| LOC285074 | yellow | -0.35259 | 0.077277 | CCT5      | turquoise | 0.318058424  | 0.10592565  | KCNC4      | yellow | -0.19616 | 0.336859 |
| PCEID1B   | yellow | -0.35157 | 0.078203 | C19orf6   | turquoise | 0.319121029  | 0.1046699   | LRSAM1     | yellow | -0.19572 | 0.337964 |
| TSSC4     | yellow | 0.351481 | 0.078282 | ATAD1     | turquoise | 0.319829328  | 0.103888742 | ASF1A      | yellow | -0.19468 | 0.34057  |
| TCEAL4    | yellow | -0.34905 | 0.080512 | PRICKLE3  | turquoise | 0.320014795  | 0.103677119 | FGD3       | yellow | -0.19352 | 0.343515 |
| PLCD1     | yellow | 0.34686  | 0.082559 | CHMP6     | turquoise | 0.323197376  | 0.100095576 | CDV3       | yellow | -0.19313 | 0.344507 |
| TBC1D20   | yellow | 0.345694 | 0.083667 | SNF8      | turquoise | 0.325542011  | 0.09751683  | KIAA0533   | yellow | -0.19274 | 0.345516 |
| TMEM102   | yellow | -0.34269 | 0.086572 | KIAA0913  | turquoise | 0.339736283  | 0.082956331 | SIRT7      | yellow | -0.19206 | 0.347237 |
| CTBS      | yellow | -0.34039 | 0.088841 | C1GALT1   | turquoise | 0.341184729  | 0.081569055 | CMBL       | yellow | -0.19183 | 0.347842 |
| TMEM242   | yellow | -0.33902 | 0.090216 | BANF1     | turquoise | 0.350435153  | 0.073121849 | BABAM1     | yellow | -0.19159 | 0.348438 |
| C16orf80  | yellow | -0.33819 | 0.091064 | ASTE1     | turquoise | 0.351401532  | 0.072279691 | HP1BP3     | yellow | -0.18948 | 0.353877 |
| FAM111A   | yellow | -0.33572 | 0.093598 | CDKAL1    | turquoise | 0.354040259  | 0.070018086 | IL4R       | yellow | -0.18928 | 0.354399 |
| CASP3     | yellow | 0.335707 | 0.093611 | SUPT4H1   | turquoise | 0.374790613  | 0.054080194 | LOC1002941 | yellow | -0.18808 | 0.357509 |
| CNTR0B    | yellow | -0.33454 | 0.094824 | ZDHHHC13  | turquoise | 0.378049193  | 0.051859412 | SLC39A13   | yellow | -0.1878  | 0.358256 |
| GPR65     | yellow | -0.3341  | 0.095296 | UBE2L3    | turquoise | 0.385419634  | 0.047100299 | TCTEX1D2   | yellow | -0.18693 | 0.36053  |
| WDFY2     | yellow | 0.333005 | 0.096448 | RPL27A    | turquoise | 0.386734257  | 0.046288896 | C7orf26    | yellow | -0.18682 | 0.360811 |
| GLUR1     | yellow | -0.33281 | 0.096652 | ATG4B     | turquoise | 0.39555454   | 0.041126486 | CDC37      | yellow | -0.18662 | 0.361332 |
| GAPDH     | yellow | 0.332424 | 0.097067 | COPE      | turquoise | 0.396949483  | 0.040353713 | GSKIP      | yellow | -0.1866  | 0.361385 |
| MAP3K12   | yellow | -0.32896 | 0.100811 | NDUFAF2   | turquoise | 0.397078886  | 0.040282616 | ZNF254     | yellow | -0.18325 | 0.370215 |
| NUBPL     | yellow | -0.32881 | 0.100976 | COPS5     | turquoise | 0.41489258   | 0.031405667 | EPBA1      | yellow | -0.18097 | 0.376307 |
| PKD1      | yellow | 0.326195 | 0.103883 | PSMC3     | turquoise | 0.42680947   | 0.026400938 | TRPCAAP    | yellow | -0.18018 | 0.378426 |
| SYMPK     | yellow | 0.324706 | 0.105565 | CENPV     | turquoise | 0.460492255  | 0.015643318 | ATP2C1     | yellow | -0.17962 | 0.379937 |
| MRP535    | yellow | -0.32304 | 0.107472 | EFN81     | turquoise | 0.493222119  | 0.008944208 | VPS37C     | yellow | -0.1795  | 0.380272 |
| ZNF493    | yellow | -0.32101 | 0.109824 | ARHGGEF12 | turquoise | 0.504924172  | 0.007227684 | PARP2      | yellow | -0.17934 | 0.380679 |
| MMP15     | yellow | 0.320814 | 0.110054 | VAT1      | turquoise | 0.548596359  | 0.003046781 | GNB4       | yellow | -0.1791  | 0.381336 |
| MIB2      | yellow | 0.32071  | 0.110175 | CWC25     | white     | -0.368645018 | 0.058470552 | PBXIP1     | yellow | -0.17861 | 0.382661 |
| SNRPD3    | yellow | -0.31922 | 0.111928 | GLRX      | white     | -0.317487667 | 0.106588429 | CNNG2      | yellow | -0.17682 | 0.387523 |
| ASF1A     | yellow | -0.31833 | 0.112988 | CUTA      | white     | -0.276190825 | 0.163160543 | ZNF93      | yellow | -0.17512 | 0.392184 |
| MESDC1    | yellow | 0.318172 | 0.11318  | TBCB      | white     | -0.267101121 | 0.178029799 | HNMT       | yellow | -0.1745  | 0.393894 |
| STK35     | yellow | -0.31664 | 0.115027 | RPL13A    | white     | -0.266617277 | 0.178847103 | GNPDA1     | yellow | -0.17342 | 0.396875 |
| FAM120B   | yellow | 0.314977 | 0.117049 | C12orf44  | white     | -0.2501615   | 0.208213022 | ALPK1      | yellow | -0.17333 | 0.397112 |
| HAU54     | yellow | -0.31341 | 0.118975 | UBXN1     | white     | -0.243462866 | 0.221055874 | ZNF740     | yellow | -0.17299 | 0.398052 |
| DARS2     | yellow | -0.31213 | 0.120575 | POLR2C    | white     | -0.238270549 | 0.231369929 | ST3GAL5    | yellow | -0.17294 | 0.3982   |
| ZCHC6     | yellow | -0.31105 | 0.121929 | MRPL54    | white     | -0.206499089 | 0.301407635 | MAN2B1     | yellow | -0.17175 | 0.401513 |
| ZNF335    | yellow | 0.310324 | 0.122854 | NDUFS8    | white     | -0.201122908 | 0.314443732 | CYGB       | yellow | -0.17126 | 0.402861 |
| POLR2A    | yellow | 0.310264 | 0.12293  | RPLP0     | white     | -0.172337117 | 0.390023728 | AAAS       | yellow | -0.17092 | 0.40381  |
| C19orf38  | yellow | 0.306322 | 0.128014 | UBB       | white     | -0.145929856 | 0.46765777  | BLOC155    | yellow | -0.17092 | 0.403815 |
| ADRM1     | yellow | 0.306164 | 0.128221 | RPS18     | white     | -0.121921831 | 0.544638329 | TMEM163    | yellow | -0.17031 | 0.405528 |
| APPL1     | yellow | -0.30616 | 0.128231 | C11orf31  | white     | -0.110315784 | 0.583849677 | LCMT1      | yellow | -0.16972 | 0.407177 |
| GOT1      | yellow | -0.30464 | 0.130224 | EIF3B     | white     | -0.099513866 | 0.621412041 | DBF4       | yellow | -0.16966 | 0.407351 |
| C17orf61  | yellow | -0.30464 | 0.130235 | OSTF1     | white     | -0.070097029 | 0.728270155 | ZBTB6      | yellow | -0.1669  | 0.415137 |
| SCAMP1    | yellow | -0.30343 | 0.131843 | RPS19BP1  | white     | -0.05598647  | 0.781499082 | MAPKBP1    | yellow | -0.16682 | 0.415362 |
| CNCG2     | yellow | -0.302   | 0.133764 | RPL36     | white     | -0.040415457 | 0.841363924 | UPF2       | yellow | -0.16634 | 0.416726 |
| OXS1R1    | yellow | -0.30169 | 0.13418  | NIPAL2    | white     | -0.036713127 | 0.857388818 | PLA2G7     | yellow | -0.16627 | 0.416909 |
| GLYCTK    | yellow | 0.301348 | 0.134645 | KLHL6     | white     | -0.033987818 | 0.866349318 | STAG3      | yellow | -0.16573 | 0.41844  |
| GMFB      | yellow | -0.3011  | 0.134986 | DIDO1     | white     | -0.028147594 | 0.889161192 | CDKL1      | yellow | -0.16542 | 0.419331 |
| KDEL2     | yellow | 0.300429 | 0.135896 | MRPS18C   | white     | -0.026301642 | 0.896390292 | AUP1       | yellow | -0.16454 | 0.421833 |
| AMHDH2    | yellow | 0.298953 | 0.137924 | ARPCS5    | white     | -0.025683719 | 0.898812029 | MIPPEP     | yellow | -0.16451 | 0.421942 |
| EIF2B1    | yellow | -0.29889 | 0.138008 | RPA2      | white     | -0.020885185 | 0.917646735 | TRERF1     | yellow | -0.16434 | 0.422403 |
| ZNHIT1    | yellow | -0.29853 | 0.138512 | RNF181    | white     | 0.023673725  | 0.906695521 | MTRFRD2    | yellow | -0.16431 | 0.4225   |
| EH4       | yellow | -0.29844 | 0.138632 | BPGM      | white     | 0.036537352  | 0.856422448 | GSE1       | yellow | -0.16391 | 0.423662 |
| PARP8     | yellow | -0.29563 | 0.142567 | CLEC16A   | white     | 0.08535645   | 0.672067549 | SNORA57    | yellow | -0.16336 | 0.42523  |
| LY6G5B    | yellow | 0.295405 | 0.142887 | AKT3      | white     | 0.091044541  | 0.651531419 | TTL        | yellow | -0.16328 | 0.425451 |
| CHRNA5    | yellow | -0.29378 | 0.145207 | TBC1D13   | white     | 0.105003963  | 0.602197161 | PSMA2      | yellow | -0.1617  | 0.430001 |
| PLAGL2    | yellow | 0.293695 | 0.145324 | GSTO1     | white     | 0.106560293  | 0.596796239 | MED12      | yellow | -0.16126 | 0.431283 |
| CNST      | yellow | -0.29328 | 0.145915 | UBL5      | white     | 0.126036654  | 0.531037966 | CEP350     | yellow | -0.15818 | 0.440256 |
| COX7C     | yellow | -0.29167 | 0.148256 | FAM178A   | white     | 0.147303699  | 0.46343135  | NFATC1     | yellow | -0.15772 | 0.441588 |
| FLOT1     | yellow | -0.29146 | 0.148559 | RPS26     | white     | 0.204720036  | 0.30568351  | IL6R       | yellow | -0.15704 | 0.443599 |
| SCRN3     | yellow | -0.291   | 0.149224 | RAD51C    | white     | 0.282760884  | 0.152975097 | LHPP       | yellow | -0.15516 | 0.44915  |
| DECLR2    | yellow | -0.2904  | 0.150109 | TCF3      | yellow    | -0.680964937 | 9.24536E-05 | WHSC2      | yellow | -0.15437 | 0.451468 |
| KIFAP3    | yellow | -0.29035 | 0.150186 | PDK1      | yellow    | -0.676074565 | 0.000108492 | SUGP2      | yellow | -0.15381 | 0.453133 |
| CASD1     | yellow | -0.28828 | 0.153241 | BID       | yellow    | -0.638182273 | 0.000341436 | SSR4       | yellow | -0.15252 | 0.45699  |
| TP1       | yellow | -0.28612 | 0.15648  | LDB1      | yellow    | -0.637528141 | 0.000347797 | EIF4G2     | yellow | -0.1524  | 0.457332 |
| SLC16A3   | yellow | 0.285682 | 0.157144 | MBD6      | yellow    | -0.627192547 | 0.000463038 | MTX2       | yellow | -0.15176 | 0.459251 |
| ADAMTS1   | yellow | 0.285449 | 0.157498 | CMIP      | yellow    | -0.616320686 | 0.000619015 | SDHD       | yellow | -0.15173 | 0.459345 |
| TAPBP1    | yellow | -0.28516 | 0.157939 | STK25     | yellow    | -0.611386801 | 0.000703743 | SLFN11     | yellow | -0.15147 | 0.460111 |
| WI2       | yellow | 0.28479  | 0.158501 | ARSA      | yellow    | -0.606785699 | 0.000791683 | DHX37      | yellow | -0.15083 | 0.462057 |
| SNORA84   | yellow | 0.284197 | 0.159408 | FASTKD5   | yellow    | -0.601944381 | 0.000894384 | SNORA62    | yellow | -0.15059 | 0.462776 |
| EPHB6     | yellow | 0.283999 | 0.159711 | NSRP1     | yellow    | -0.588545218 | 0.001241193 | PXB1       | yellow | -0.15022 | 0.463893 |
| C12orf23  | yellow | 0.281641 | 0.163357 | FYTTD1    | yellow    | -0.585824954 | 0.001324299 | TBC1D4     | yellow | -0.1488  | 0.468169 |
| PSIP1     | yellow | -0.28124 |          |           |           |              |             |            |        |          |          |

Table 6. Gene module membership and correlation with growth rate (48/72h), with adjusted p values for each module

|           |        |           |          |           |        |              |             |           |        |          |          |
|-----------|--------|-----------|----------|-----------|--------|--------------|-------------|-----------|--------|----------|----------|
| NVL       | yellow | -0.27871  | 0.167973 | SIRT2     | yellow | -0.571313703 | 0.001853858 | NFIC      | yellow | -0.13987 | 0.49557  |
| DIAPH2    | yellow | 0.275224  | 0.173575 | COA4      | yellow | -0.570380421 | 0.00189341  | AZ12      | yellow | -0.13954 | 0.49659  |
| TRAPP2L   | yellow | -0.27495  | 0.174017 | CCR1      | yellow | -0.568681226 | 0.001967288 | CCDC86    | yellow | -0.13923 | 0.49757  |
| LTV1      | yellow | -0.27469  | 0.17444  | ATXN1     | yellow | -0.565933954 | 0.002091982 | CPYD      | yellow | -0.13713 | 0.504136 |
| SMARCC1   | yellow | -0.27383  | 0.175847 | CEBPB     | yellow | -0.565902101 | 0.002093467 | NLRX1     | yellow | -0.13569 | 0.508647 |
| PITRM1    | yellow | -0.27295  | 0.177298 | ZNF431    | yellow | -0.563594865 | 0.002203447 | CBX7      | yellow | -0.13483 | 0.511381 |
| ZNF383    | yellow | -0.27273  | 0.177663 | AFG3L2    | yellow | -0.562278774 | 0.002268377 | C16orf54  | yellow | -0.13462 | 0.512027 |
| PTP4A1    | yellow | -0.27263  | 0.17783  | DNAJB2    | yellow | -0.560494743 | 0.002359013 | TSC2D04   | yellow | -0.13443 | 0.512642 |
| ASH2L     | yellow | -0.27232  | 0.178336 | PDIA4     | yellow | -0.55987316  | 0.002391313 | SNORA14A  | yellow | -0.13442 | 0.51267  |
| CTPS1     | yellow | -0.271    | 0.180538 | CXCL2     | yellow | -0.558698126 | 0.002453411 | CUEDC1    | yellow | -0.13428 | 0.513115 |
| SELP1G    | yellow | -0.2703   | 0.181719 | CHMP1A    | yellow | -0.557523963 | 0.00251684  | MPND      | yellow | -0.13391 | 0.514298 |
| RHBD3     | yellow | 0.26822   | 0.18523  | HIST1H2BC | yellow | -0.556631877 | 0.002565966 | TBL2      | yellow | -0.13368 | 0.515026 |
| SHQ1      | yellow | -0.26793  | 0.185722 | DGAT1     | yellow | -0.556139047 | 0.002593457 | ELF2      | yellow | -0.13347 | 0.515695 |
| MZT1      | yellow | -0.26773  | 0.186067 | SUPV3L1   | yellow | -0.555979612 | 0.002602404 | TNPO1     | yellow | -0.13303 | 0.517076 |
| LRBA      | yellow | -0.26716  | 0.187035 | IDH3B     | yellow | -0.555526478 | 0.002627978 | BCL7B     | yellow | -0.13289 | 0.517515 |
| ITCH      | yellow | -0.26593  | 0.189158 | RPUSO1    | yellow | -0.555165187 | 0.002648522 | ZBTB44    | yellow | -0.13265 | 0.518289 |
| TTC38     | yellow | -0.26542  | 0.190032 | RBM42     | yellow | -0.555101232 | 0.002652173 | TP53I1    | yellow | -0.13234 | 0.519271 |
| CDYL      | yellow | 0.264113  | 0.192309 | GLTPD1    | yellow | -0.554182425 | 0.002705103 | DNAJC17   | yellow | -0.13199 | 0.520398 |
| BAG1      | yellow | -0.26384  | 0.192791 | TMF1      | yellow | -0.551585053 | 0.002859653 | GPR85     | yellow | -0.13104 | 0.523428 |
| ALDH5A1   | yellow | -0.2633   | 0.193737 | GNP2      | yellow | -0.55052374  | 0.002924945 | TMOD3     | yellow | -0.13032 | 0.525723 |
| C9orf114  | yellow | -0.26251  | 0.195123 | UBE4A     | yellow | -0.54974947  | 0.002973378 | ZFP3      | yellow | -0.12693 | 0.536642 |
| FBXL6     | yellow | -0.2622   | 0.195671 | MTO1      | yellow | -0.549540676 | 0.002986556 | LSM3      | yellow | -0.1261  | 0.539344 |
| GCNT1     | yellow | -0.26201  | 0.19601  | ZNF564    | yellow | -0.547821565 | 0.003096966 | GCNT2     | yellow | -0.12442 | 0.544782 |
| CKAP2     | yellow | -0.26199  | 0.196043 | DPP9      | yellow | -0.547717264 | 0.003103776 | CDK10     | yellow | -0.12221 | 0.552001 |
| TOR2A     | yellow | 0.261335  | 0.197202 | TNFAIP3   | yellow | -0.544901984 | 0.003292476 | WDR26     | yellow | -0.12161 | 0.553979 |
| TPGS2     | yellow | -0.26076  | 0.198219 | CDAN1     | yellow | -0.543794302 | 0.00336936  | ZFYVE9    | yellow | -0.12092 | 0.55626  |
| NEDD10    | yellow | -0.26038  | 0.198996 | ST3GAL1   | yellow | -0.543631922 | 0.003380759 | LILRB3    | yellow | -0.1197  | 0.560274 |
| NABP1     | yellow | -0.25916  | 0.201091 | LOCA40434 | yellow | -0.542845559 | 0.003436427 | ABI2      | yellow | -0.11893 | 0.562825 |
| ZBTB5     | yellow | 0.258958  | 0.201456 | STUB1     | yellow | -0.541901758 | 0.00350427  | TTC7A     | yellow | -0.11881 | 0.563229 |
| PSMA1     | yellow | -0.25886  | 0.201641 | CXCL1     | yellow | -0.540823615 | 0.003583166 | MIA3      | yellow | -0.11848 | 0.564318 |
| UBA7      | yellow | -0.2586   | 0.202102 | TSG101    | yellow | -0.540435811 | 0.003611912 | CIAO1     | yellow | -0.11744 | 0.567758 |
| LMF1      | yellow | 0.258214  | 0.202801 | SCARNA5   | yellow | -0.540230245 | 0.00362723  | SON       | yellow | -0.11691 | 0.569499 |
| MPP7      | yellow | -0.25695  | 0.205092 | PAPSS2    | yellow | -0.539973103 | 0.003646468 | MECR      | yellow | -0.11431 | 0.578177 |
| SRRM1     | yellow | -0.25695  | 0.205094 | MGRN1     | yellow | -0.539619869 | 0.003673038 | TUBGCP6   | yellow | -0.11309 | 0.582275 |
| APOL4     | yellow | -0.25645  | 0.206012 | SCRIB     | yellow | -0.538756071 | 0.003738707 | MCAT      | yellow | -0.11249 | 0.584301 |
| ZNF644    | yellow | 0.256115  | 0.206626 | FUS       | yellow | -0.53867382  | 0.003745012 | MED25     | yellow | -0.11197 | 0.586032 |
| PLD3      | yellow | 0.255367  | 0.208001 | TBC1D2B   | yellow | -0.537277266 | 0.003853455 | USF2      | yellow | -0.11131 | 0.588272 |
| GALK2     | yellow | -0.25464  | 0.20935  | COBRA1    | yellow | -0.53283176  | 0.004216635 | NDFIP2    | yellow | -0.11041 | 0.591309 |
| TMEM159   | yellow | -0.25372  | 0.211043 | LOCS41471 | yellow | -0.532272528 | 0.004264318 | TDRKH     | yellow | -0.11019 | 0.592054 |
| PRR14L    | yellow | -0.25346  | 0.211541 | TRMT61A   | yellow | -0.531349039 | 0.004344064 | SCARNA17  | yellow | -0.10978 | 0.593424 |
| TXNDC12   | yellow | -0.25324  | 0.211941 | MLL       | yellow | -0.531321977 | 0.00434642  | MAP3K11   | yellow | -0.10927 | 0.595163 |
| VPS29     | yellow | -0.25314  | 0.212122 | TAF1B     | yellow | -0.529930974 | 0.004468985 | ZNF319    | yellow | -0.10878 | 0.596821 |
| UIMC1     | yellow | -0.25172  | 0.214802 | MED28     | yellow | -0.528911471 | 0.004560669 | USP35     | yellow | -0.10866 | 0.597223 |
| RBM26     | yellow | -0.25149  | 0.215224 | ICAM1     | yellow | -0.528311418 | 0.004615375 | NHP2L1    | yellow | -0.10476 | 0.61052  |
| DDO       | yellow | 0.251044  | 0.216068 | NABP2     | yellow | -0.524605383 | 0.004965747 | RPS4X     | yellow | -0.10466 | 0.610889 |
| RBL2      | yellow | -0.25084  | 0.216448 | ELF2      | yellow | -0.52379112  | 0.005045677 | NAA40     | yellow | -0.10441 | 0.611728 |
| UBA6      | yellow | -0.24927  | 0.219444 | ETFB      | yellow | -0.521375272 | 0.005289271 | C22orf29  | yellow | -0.10409 | 0.612845 |
| STX11     | yellow | -0.24882  | 0.220301 | TBC1D10B  | yellow | -0.520996933 | 0.005328307 | TMEM41A   | yellow | -0.10336 | 0.615351 |
| SH3BP2    | yellow | 0.248282  | 0.221331 | MAP3K4    | yellow | -0.520721202 | 0.00535691  | YME1L1    | yellow | -0.10231 | 0.618941 |
| DENND3    | yellow | 0.24822   | 0.221451 | TRIP10    | yellow | -0.520585981 | 0.005370984 | TMED10    | yellow | -0.10225 | 0.619174 |
| CSF3R     | yellow | 0.248043  | 0.221793 | HIST1H1C  | yellow | -0.518816761 | 0.005558036 | LATS2     | yellow | -0.10186 | 0.620514 |
| EPS8L1    | yellow | 0.247376  | 0.223077 | CCDC137   | yellow | -0.517142968 | 0.005740044 | TMC6      | yellow | -0.10161 | 0.62138  |
| MAPK13    | yellow | 0.246986  | 0.223832 | STAG2     | yellow | -0.516887437 | 0.005768268 | HELZ2     | yellow | -0.09981 | 0.627597 |
| MCM3      | yellow | -0.24604  | 0.225669 | MPHOSPH8  | yellow | -0.5159705   | 0.005870517 | UPF3A     | yellow | -0.09804 | 0.633731 |
| KIAA1715  | yellow | -0.24579  | 0.226158 | TMEM106A  | yellow | -0.512401694 | 0.006283188 | BTBD6     | yellow | -0.0979  | 0.634222 |
| TXNRD2    | yellow | 0.245727  | 0.226278 | LMAN1     | yellow | -0.512377094 | 0.006286116 | CCT5      | yellow | -0.09738 | 0.636018 |
| DBF4      | yellow | -0.24495  | 0.227797 | RPS6K1C1  | yellow | -0.512320439 | 0.006292862 | C3orf37   | yellow | -0.09664 | 0.638629 |
| TXNDC17   | yellow | -0.24467  | 0.228341 | WFS1      | yellow | -0.510734304 | 0.006484228 | DVL3      | yellow | -0.09636 | 0.63959  |
| IKBKAP    | yellow | -0.24439  | 0.228888 | IRF8      | yellow | -0.510431049 | 0.006521368 | FANCG     | yellow | -0.09565 | 0.642077 |
| MUT       | yellow | -0.24426  | 0.229154 | SART1     | yellow | -0.510218416 | 0.006547517 | SEC13     | yellow | -0.09534 | 0.643168 |
| DTNB1P1   | yellow | -0.24387  | 0.229921 | PHYH      | yellow | -0.509275402 | 0.006664554 | PPARD     | yellow | -0.09358 | 0.649326 |
| RAB11FIP2 | yellow | -0.24383  | 0.230006 | ZCCHC2    | yellow | -0.509143719 | 0.006681036 | NMT1      | yellow | -0.09329 | 0.650334 |
| ABTB1     | yellow | 0.243758  | 0.230138 | SIRT7     | yellow | -0.508795873 | 0.006724741 | MNT       | yellow | -0.09243 | 0.653372 |
| COA3      | yellow | -0.24345  | 0.230744 | TTC31     | yellow | -0.507993567 | 0.006826465 | AGA       | yellow | -0.09172 | 0.655869 |
| PHF1      | yellow | 0.242939  | 0.231757 | RALBP1    | yellow | -0.507063737 | 0.006945976 | FAM86A    | yellow | -0.0915  | 0.656643 |
| DUSP22    | yellow | 0.242732  | 0.232167 | SF1       | yellow | -0.50681542  | 0.006978189 | KIS3      | yellow | -0.09048 | 0.660247 |
| LILRA2    | yellow | 0.242636  | 0.232358 | SETD8     | yellow | -0.506761145 | 0.006985247 | DXS2L2    | yellow | -0.08612 | 0.67573  |
| CTDSP2    | yellow | 0.242215  | 0.233194 | TRAPP11   | yellow | -0.505668264 | 0.007128641 | KIFC2     | yellow | -0.08497 | 0.679837 |
| NOP9      | yellow | -0.24168  | 0.234254 | HTT       | yellow | -0.505410921 | 0.007162765 | C12orf29  | yellow | -0.08328 | 0.685863 |
| FAR1      | yellow | -0.24167  | 0.234271 | NUP205    | yellow | -0.505276571 | 0.007180634 | TRIM56    | yellow | -0.08266 | 0.688078 |
| FAM105B   | yellow | -0.24103  | 0.235562 | CORO2A    | yellow | -0.505228041 | 0.007187098 | ERMAP     | yellow | -0.08172 | 0.691478 |
| MTERFD2   | yellow | -0.24039  | 0.236845 | SMS       | yellow | -0.504593647 | 0.007272048 | HIFX      | yellow | -0.07989 | 0.69805  |
| CLPX      | yellow | -0.2401   | 0.23742  | RARA      | yellow | -0.50305397  | 0.007481741 | ICMT      | yellow | -0.07888 | 0.701688 |
| DOCK11    | yellow | -0.23981  | 0.238005 | YBX1      | yellow | -0.502325367 | 0.00758273  | PI4K2A    | yellow | -0.07778 | 0.705679 |
| ZMYND8    | yellow | -0.23955  | 0.238545 | C15orf39  | yellow | -0.501670331 | 0.007674498 | TAGLN2    | yellow | -0.07572 | 0.713143 |
| MAP3K8    | yellow | 0.239415  | 0.238808 | C21orf59  | yellow | -0.500079595 | 0.007901246 | GNAQ      | yellow | -0.07548 | 0.714025 |
| BCL2L12   | yellow | 0.239167  | 0.239311 | C3        | yellow | -0.499903852 | 0.007926639 | SLC35B4   | yellow | -0.07217 | 0.72606  |
| PRKCH     | yellow | -0.23898  | 0.239684 | NLR4      | yellow | -0.499370547 | 0.008004114 | DGCR11    | yellow | -0.0701  | 0.733638 |
| ELL       | yellow | 0.238306  | 0.241056 | STRA13    | yellow | -0.499093559 | 0.008044604 | ATXN2L    | yellow | -0.06733 | 0.74382  |
| AKAP5     | yellow | -0.23786  | 0.241967 | UBAC1     | yellow | -0.496849894 | 0.008378959 | DNAJC15   | yellow | -0.06713 | 0.744566 |
| ARHGEF17  | yellow | 0.237446  | 0.242809 | ZCCH9C    | yellow | -0.496170222 | 0.008482516 | TREM1     | yellow | -0.06613 | 0.748229 |
| ASL       | yellow | 0.237396  | 0.242912 | COX14     | yellow | -0.49528711  | 0.008618671 | LOC440173 | yellow | -0.06568 | 0.749901 |
| MAP2K7    | yellow | 0.237381  | 0.242942 | ARPC1A    | yellow | -0.493993281 | 0.008821453 | CXCL3     | yellow | -0.06568 | 0.749911 |
| FAM175B   | yellow | -0.23633  | 0.245104 | SPNS1     | yellow | -0.492832204 | 0.009006818 | ZNF318    | yellow | -0.06548 | 0.750644 |
| NLK       | yellow | -0.23609  | 0.245595 | IL10RA    | yellow | -0.49232651  | 0.009088564 | TSTD2     | yellow | -0.06412 | 0.755646 |
| SLC30A5   | yellow | -0.23589  | 0.246012 | TRUB1     | yellow | -0.492120876 | 0.009121983 | GNB5      | yellow | -0.06376 | 0.756987 |
| TLR1      | yellow | -0.23569  | 0.24641  | MAP2K3    | yellow | -0.490999958 | 0.009305962 | UNC93B1   | yellow | -0.06301 | 0.759752 |
| IARS2     | yellow | -0.23526  | 0.247296 | SZT2      | yellow | -0.490191625 | 0.009440554 | NPRL3     | yellow | -0.06245 | 0.761827 |
| RASSF5    | yellow | -0.23483  | 0.2482   | FKBP8     | yellow | -0.489102854 | 0.00962441  | SLC35E3   | yellow | -0.06189 | 0.763914 |
| ICK       | yellow | -0.23456  | 0.248756 | HGS       | yellow | -0.487074986 | 0.009974831 | PVRL1     | yellow | -0.06178 | 0.764311 |
| ERCC3     | yellow | -0.23358  | 0.250785 | WDTC1     | yellow | -0.486611304 | 0.010056435 | CAMSAP1   | yellow | -0.06141 | 0.7657   |
| PCBD1     | yellow | -0.233423 | 0.25112  | MED24     | yellow | -0.486566835 | 0.010064291 | MCM9      | yellow | -0.06097 | 0.76733  |
| PMS2P1    | yellow | 0.233019  | 0.251965 | NCL       | yellow | -0.486470097 | 0.010081397 | LSG1      | yellow | -0.05935 | 0.773351 |
| B2M       | yellow | -0.23229  | 0.253499 | HPS4      | yellow | -0.485094087 | 0.010327362 | PLXND1    | yellow | -0.05881 | 0.775352 |
| FAM114A2  | yellow | -0.23216  | 0.253766 | TNRC18    | yellow | -0.48374707  | 0.010572974 | NAA10     | yellow | -0.05    |          |

Table 6. Gene module membership and correlation with growth rate (48/72h), with adjusted p values for each module

|           |        |          |          |           |        |              |             |           |        |          |          |
|-----------|--------|----------|----------|-----------|--------|--------------|-------------|-----------|--------|----------|----------|
| CST3      | yellow | -0.22875 | 0.261011 | UBE2Q2    | yellow | -0.474286235 | 0.012438993 | NOL7      | yellow | -0.05311 | 0.796646 |
| AOC3      | yellow | -0.22778 | 0.263083 | DHR59     | yellow | -0.474196014 | 0.012458024 | TRIOBP    | yellow | -0.04948 | 0.810285 |
| GOLGA8B   | yellow | 0.22731  | 0.2641   | PITPNM1   | yellow | -0.473418727 | 0.012622986 | HSPB1     | yellow | -0.04909 | 0.811758 |
| CAPN3     | yellow | -0.2272  | 0.264338 | DDX52     | yellow | -0.473156114 | 0.012679129 | PHF13     | yellow | -0.04823 | 0.815002 |
| CNPY2     | yellow | -0.22669 | 0.265443 | PCNP      | yellow | -0.472501287 | 0.012820022 | C11orf54  | yellow | -0.04509 | 0.826888 |
| RAPGEF3   | yellow | 0.226626 | 0.26558  | RPUSO4    | yellow | -0.472287379 | 0.012866328 | POLR3E    | yellow | -0.04286 | 0.835301 |
| ISCA2     | yellow | -0.22404 | 0.271213 | DNAH1     | yellow | -0.472087483 | 0.012909725 | TLE3      | yellow | -0.04182 | 0.839251 |
| BOP1      | yellow | 0.22367  | 0.272031 | QDPR      | yellow | -0.470071239 | 0.013354283 | FNDC3B    | yellow | -0.04163 | 0.839967 |
| DDX1      | yellow | -0.2221  | 0.275499 | HNRNPA3   | yellow | -0.468924938 | 0.013612636 | CDKN2D    | yellow | -0.04119 | 0.841636 |
| TIGD5     | yellow | 0.221379 | 0.277101 | CCDC59    | yellow | -0.46855667  | 0.01369651  | SYTL3     | yellow | -0.04089 | 0.842799 |
| STK16     | yellow | 0.220313 | 0.279479 | PLA2G4C   | yellow | -0.465417907 | 0.014428892 | SBDSP1    | yellow | -0.04003 | 0.846064 |
| KIAA0232  | yellow | -0.21874 | 0.283025 | ZNF417    | yellow | -0.464837782 | 0.014567738 | ANKLE2    | yellow | -0.03849 | 0.851901 |
| TUBA1C    | yellow | 0.218482 | 0.283597 | ZNF45     | yellow | -0.462363499 | 0.015172393 | NME7      | yellow | -0.03729 | 0.85649  |
| DHX16     | yellow | 0.21811  | 0.284437 | TMEM175   | yellow | -0.461801913 | 0.015312478 | ITPKB     | yellow | -0.03616 | 0.860796 |
| GPX1      | yellow | -0.21798 | 0.284734 | RNF2      | yellow | -0.461558262 | 0.015373587 | VMA21     | yellow | -0.03544 | 0.863554 |
| TET2      | yellow | -0.21779 | 0.285167 | UTP11L    | yellow | -0.460832795 | 0.01555673  | TMEM201   | yellow | -0.03343 | 0.871211 |
| LRP1      | yellow | -0.21767 | 0.285427 | CLIP1     | yellow | -0.460000435 | 0.015769073 | PKN1      | yellow | -0.03314 | 0.872322 |
| PRMT2     | yellow | -0.21743 | 0.285971 | TRIM26    | yellow | -0.459945848 | 0.015783082 | TGFB1     | yellow | -0.0329  | 0.87325  |
| RNF31     | yellow | 0.217077 | 0.286782 | WTAP      | yellow | -0.459881978 | 0.015799486 | PDIA6     | yellow | -0.03192 | 0.876992 |
| IST1      | yellow | -0.2168  | 0.28742  | HIST1H2AC | yellow | -0.458298989 | 0.01621057  | SLC26A11  | yellow | -0.02982 | 0.885016 |
| ZCCHC24   | yellow | 0.21643  | 0.288256 | AK2       | yellow | -0.458197272 | 0.016237283 | PIK3C3    | yellow | -0.0285  | 0.890074 |
| DBND2     | yellow | -0.21642 | 0.288268 | CS        | yellow | -0.458042783 | 0.016277926 | DCTN1     | yellow | -0.02826 | 0.890991 |
| NET1      | yellow | -0.2162  | 0.288789 | ZC3H7A    | yellow | -0.45787648  | 0.016321769 | ZNF671    | yellow | -0.02736 | 0.894445 |
| ATP6V0E1  | yellow | 0.216072 | 0.289074 | ACTR5     | yellow | -0.457091429 | 0.016530053 | ATG4A     | yellow | -0.02734 | 0.894512 |
| NCF2      | yellow | -0.21486 | 0.291858 | BLVRA     | yellow | -0.456997426 | 0.016555139 | NCSTN     | yellow | -0.02567 | 0.900941 |
| RNR3      | yellow | -0.21462 | 0.292415 | CD2BP2    | yellow | -0.456473437 | 0.01669555  | HINT2     | yellow | -0.02468 | 0.904729 |
| LOC253039 | yellow | 0.214088 | 0.293632 | TBC1D10A  | yellow | -0.456410726 | 0.01671242  | PTGES2    | yellow | -0.02467 | 0.904774 |
| PP5C      | yellow | -0.2138  | 0.294296 | CDK11A    | yellow | -0.455788239 | 0.016880637 | PGBD2     | yellow | -0.02347 | 0.909385 |
| ABCA11P   | yellow | 0.213397 | 0.295229 | YOD1      | yellow | -0.455783171 | 0.016882012 | SLC9A3R2  | yellow | -0.0229  | 0.911593 |
| ENTHD2    | yellow | -0.21333 | 0.295394 | MRPL52    | yellow | -0.455682292 | 0.016909406 | CUL2      | yellow | -0.02244 | 0.913346 |
| ADD3      | yellow | -0.21318 | 0.295729 | KANSL3    | yellow | -0.455520413 | 0.01695344  | PTPN1     | yellow | -0.02211 | 0.914617 |
| STX18     | yellow | 0.213063 | 0.296003 | CUTC      | yellow | -0.455137028 | 0.017058106 | NSMCE2    | yellow | -0.02205 | 0.914841 |
| SYNGAP1   | yellow | -0.2129  | 0.296386 | PQBP1     | yellow | -0.454122112 | 0.017337751 | FAM135A   | yellow | -0.02177 | 0.915924 |
| TMEM185E  | yellow | -0.21213 | 0.298164 | ARRDC3    | yellow | -0.453874627 | 0.01740651  | NOP14     | yellow | -0.02169 | 0.916243 |
| PHF5A     | yellow | -0.21213 | 0.298182 | MTG1      | yellow | -0.452784888 | 0.017711949 | NOC4L     | yellow | -0.02166 | 0.916357 |
| HDAC8     | yellow | -0.2109  | 0.301045 | PSIP1     | yellow | -0.452005694 | 0.017933035 | HARB11    | yellow | -0.02134 | 0.917589 |
| LRRC25    | yellow | 0.210403 | 0.302217 | HNRNPA2B2 | yellow | -0.451821267 | 0.017985695 | NIF3L1    | yellow | -0.02106 | 0.918664 |
| TXN2      | yellow | 0.209707 | 0.303856 | CANX      | yellow | -0.451745024 | 0.018007502 | DUSP16    | yellow | -0.01788 | 0.930897 |
| C1orf159  | yellow | -0.20964 | 0.304005 | WHAMM     | yellow | -0.451041418 | 0.018209772 | DENNND4A  | yellow | -0.01742 | 0.932681 |
| MARK3     | yellow | -0.20936 | 0.304663 | DDX26B    | yellow | -0.450553209 | 0.018351266 | ZNF132    | yellow | -0.01694 | 0.934529 |
| T0B2      | yellow | 0.208745 | 0.306131 | MTIX      | yellow | -0.449849939 | 0.018556546 | OPHN1     | yellow | -0.01673 | 0.935339 |
| TRIM11    | yellow | 0.207693 | 0.30863  | MT1E      | yellow | -0.445456881 | 0.019882276 | ATL2      | yellow | -0.01671 | 0.935438 |
| MPP5      | yellow | -0.20753 | 0.309023 | CCDC174   | yellow | -0.444872203 | 0.020064424 | TES       | yellow | -0.01531 | 0.940826 |
| ANPEP     | yellow | -0.20694 | 0.310414 | E1FB4     | yellow | -0.444657783 | 0.020131564 | TRIM65    | yellow | -0.01339 | 0.948251 |
| PSAT1     | yellow | -0.20653 | 0.311398 | PLOD3     | yellow | -0.442711093 | 0.020749578 | LRRC45    | yellow | -0.01318 | 0.94904  |
| C21orf7   | yellow | -0.20565 | 0.313506 | TET3      | yellow | -0.441884904 | 0.021016514 | PLEC      | yellow | -0.01225 | 0.952645 |
| SCARNA12  | yellow | -0.20526 | 0.314466 | PPP2R5B   | yellow | -0.440976244 | 0.02131333  | FARP1     | yellow | -0.01202 | 0.953524 |
| SLCSA6    | yellow | 0.204654 | 0.31592  | SH3GL1    | yellow | -0.440521882 | 0.021463027 | SBD5      | yellow | -0.01151 | 0.955503 |
| RRP12     | yellow | 0.204346 | 0.316663 | GLTSCR2   | yellow | -0.438553247 | 0.022212158 | TNPO2     | yellow | -0.00962 | 0.962801 |
| LRRCL4    | yellow | 0.203865 | 0.317828 | PARG      | yellow | -0.437313045 | 0.022544853 | OPLAH     | yellow | -0.00941 | 0.96362  |
| GTFC3     | yellow | -0.2038  | 0.317981 | MRPS25    | yellow | -0.437078056 | 0.022625792 | SLRP      | yellow | -0.00934 | 0.963881 |
| DDHD2     | yellow | -0.20351 | 0.318689 | SERF1A    | yellow | -0.436474834 | 0.022834651 | ATP6V0C   | yellow | -0.00774 | 0.970058 |
| ING4      | yellow | 0.202772 | 0.320486 | CNDP2     | yellow | -0.435862999 | 0.023048093 | ORCS      | yellow | -0.0073  | 0.971757 |
| CERK      | yellow | -0.2018  | 0.322864 | CBFB      | yellow | -0.434762741 | 0.023436013 | LRRK2     | yellow | -0.00443 | 0.982852 |
| TRIP11    | yellow | -0.20135 | 0.323968 | VIMP      | yellow | -0.432598599 | 0.024214537 | RAD18     | yellow | -0.00421 | 0.983698 |
| TJAP1     | yellow | -0.20119 | 0.324365 | TUSC2     | yellow | -0.431057975 | 0.024781469 | ZDHHC9    | yellow | -0.00172 | 0.993357 |
| PLEKH01   | yellow | -0.20091 | 0.325049 | POLK      | yellow | -0.430751817 | 0.024895405 | ZNF804A   | yellow | 9.8E-05  | 0.999621 |
| ZNF673    | yellow | 0.200553 | 0.325924 | AP5Z1     | yellow | -0.429386824 | 0.025408577 | KAT6A     | yellow | 0.003238 | 0.987474 |
| PRPF38A   | yellow | -0.20008 | 0.32709  | OPTN      | yellow | -0.429013658 | 0.025550353 | DPAG10    | yellow | 0.004215 | 0.983694 |
| MNDN1     | yellow | -0.2     | 0.327285 | SLK       | yellow | -0.427854499 | 0.02599485  | BTBD11    | yellow | 0.004368 | 0.983104 |
| DNMT3A    | yellow | -0.19963 | 0.3282   | CD68      | yellow | -0.427706624 | 0.026052003 | C16orf87  | yellow | 0.005563 | 0.978481 |
| DGCR6L    | yellow | -0.19866 | 0.330613 | TMEM158   | yellow | -0.427053073 | 0.02630582  | EPB41L1   | yellow | 0.006702 | 0.974079 |
| TPD52     | yellow | -0.1986  | 0.330759 | SNX12     | yellow | -0.425051326 | 0.027095725 | DNAJC11   | yellow | 0.007275 | 0.971862 |
| MTRR      | yellow | -0.19724 | 0.334143 | SERTAD3   | yellow | -0.423920718 | 0.027550288 | ELL2      | yellow | 0.008041 | 0.968901 |
| ZC3HAV1   | yellow | 0.197115 | 0.334456 | MPRIIP    | yellow | -0.421459386 | 0.02856122  | CCDC106   | yellow | 0.009869 | 0.961836 |
| TMOD3     | yellow | -0.19669 | 0.335509 | UNC13D    | yellow | -0.421375278 | 0.028596287 | NTSC3     | yellow | 0.011324 | 0.956216 |
| MED23     | yellow | -0.19658 | 0.335805 | VTI1A     | yellow | -0.420374519 | 0.029016215 | PPM1N     | yellow | 0.011397 | 0.955935 |
| WDR43     | yellow | -0.19643 | 0.336184 | PTPRA     | yellow | -0.419925275 | 0.029206334 | PTPRE     | yellow | 0.011916 | 0.953928 |
| BMP2K     | yellow | -0.19606 | 0.337111 | PHF11     | yellow | -0.419696991 | 0.029303327 | PHF3      | yellow | 0.013078 | 0.94944  |
| MACC1     | yellow | -0.1952  | 0.339269 | ERP29     | yellow | -0.418463678 | 0.029831845 | C9orf64   | yellow | 0.015902 | 0.938543 |
| GCFC2     | yellow | -0.19507 | 0.339589 | RNF166    | yellow | -0.418283662 | 0.029909627 | LPCAT3    | yellow | 0.017945 | 0.930666 |
| MEN1      | yellow | -0.19456 | 0.340879 | AKAP1     | yellow | -0.417096344 | 0.030426753 | LINC00094 | yellow | 0.019431 | 0.924939 |
| NZF529    | yellow | -0.19431 | 0.341514 | RIOK1     | yellow | -0.415868082 | 0.030969268 | LYGE      | yellow | 0.019563 | 0.924428 |
| PPP3CC    | yellow | -0.19366 | 0.343169 | DDX39B    | yellow | -0.414679596 | 0.031501602 | ACP1      | yellow | 0.019777 | 0.923607 |
| ADAM15    | yellow | 0.193611 | 0.343291 | NR1D2     | yellow | -0.413987954 | 0.031814768 | TOMM22    | yellow | 0.020341 | 0.921435 |
| C7orf50   | yellow | 0.192422 | 0.346321 | TPM3      | yellow | -0.412370674 | 0.032556827 | SLAIN2    | yellow | 0.021119 | 0.918438 |
| TIPRL     | yellow | -0.19189 | 0.347684 | PSMD6     | yellow | -0.410436312 | 0.033462569 | TTC4      | yellow | 0.022886 | 0.911638 |
| RPB4      | yellow | -0.1911  | 0.349698 | ID1       | yellow | -0.406227435 | 0.035503223 | GPR34     | yellow | 0.024826 | 0.90418  |
| MFSO1     | yellow | 0.190633 | 0.350908 | SNORA27   | yellow | -0.406107018 | 0.035563039 | UTP15     | yellow | 0.025534 | 0.901461 |
| ARHGEP101 | yellow | -0.19056 | 0.351106 | NKTR      | yellow | -0.406049451 | 0.035591664 | NOD1      | yellow | 0.028637 | 0.889556 |
| DDRGK1    | yellow | -0.19036 | 0.351602 | LOC285074 | yellow | -0.404839104 | 0.036197774 | RRAGB     | yellow | 0.029447 | 0.886451 |
| IFT20     | yellow | -0.18889 | 0.355401 | GNB4      | yellow | -0.404795334 | 0.036219847 | CLEC2B    | yellow | 0.032263 | 0.87567  |
| CYB5R1    | yellow | -0.18885 | 0.355512 | SLC39A11  | yellow | -0.404292684 | 0.036474097 | TRAPP5C   | yellow | 0.033372 | 0.871432 |
| CMC2      | yellow | 0.188703 | 0.355898 | PSMA1     | yellow | -0.402445669 | 0.037420632 | COGPI1    | yellow | 0.035521 | 0.863228 |
| DCTN4     | yellow | -0.18796 | 0.35782  | HDHD3     | yellow | -0.402149416 | 0.037574261 | UBE2K     | yellow | 0.03557  | 0.863041 |
| NDFIP1    | yellow | -0.18764 | 0.358651 | ERC1      | yellow | -0.402002534 | 0.037650616 | CNTR0B    | yellow | 0.036662 | 0.858875 |
| CSTA      | yellow | -0.18737 | 0.359361 | TMEM51    | yellow | -0.400292807 | 0.038548543 | TRA2B     | yellow | 0.037047 | 0.857407 |
| YPEL5     | yellow | 0.187128 | 0.360001 | ZFYVE20   | yellow | -0.39959656  | 0.03891906  | POLR3A    | yellow | 0.03778  | 0.854617 |
| GCC1      | yellow | 0.186073 | 0.362765 | GPRC5A    | yellow | -0.397263719 | 0.040181236 | CRLF3     | yellow | 0.038848 | 0.85055  |
| WDR45L    | yellow | 0.185553 | 0.36413  | PLRG1     | yellow | -0.396934211 | 0.04036216  | GOPC      | yellow | 0.039088 | 0.849637 |
| SEL1L     | yellow | 0.185218 | 0.365012 | ERLIN2    | yellow | -0.396538138 | 0.04058038  | NEK11     | yellow | 0.03926  | 0.848983 |
| RBBP5     | yellow | 0.185038 | 0.365486 | CARS      | yellow | -0.396235504 | 0.040747788 | CBL       | yellow | 0.039482 | 0.848141 |
| CDC42SE1  | yellow | 0.184529 | 0.366829 | ACP2      | yellow | -0.393617458 | 0.042219047 | IFT172    | yellow | 0.039868 | 0.846673 |
| RPS19BP1  | yellow | -0.18415 | 0.367843 | AAED1     | yellow | -0.392640607 | 0.042778684 | ST5       | yellow | 0.040652 | 0.843694 |
| ATN1      | yellow | 0.183918 | 0.368449 | LMNB2     |        |              |             |           |        |          |          |

Table 6. Gene module membership and correlation with growth rate (48/72h), with adjusted p values for each module

|          |        |          |          |          |        |              |             |            |        |          |          |
|----------|--------|----------|----------|----------|--------|--------------|-------------|------------|--------|----------|----------|
| LYZ      | yellow | 0.181163 | 0.375788 | ZNF276   | yellow | -0.380943243 | 0.04994766  | MAP7D1     | yellow | 0.046142 | 0.822891 |
| PTAR1    | yellow | -0.18113 | 0.375865 | VCAN     | yellow | -0.379975241 | 0.05058083  | LOC1005056 | yellow | 0.04678  | 0.820483 |
| COMT     | yellow | 0.180097 | 0.378651 | CDC5L    | yellow | -0.379604935 | 0.050824709 | METTL5     | yellow | 0.047299 | 0.818523 |
| MED10    | yellow | 0.179837 | 0.379352 | RBMX2    | yellow | -0.378740161 | 0.051397836 | SAMD1      | yellow | 0.049205 | 0.811336 |
| TMEM199  | yellow | -0.17976 | 0.379553 | TRPM4    | yellow | -0.375579981 | 0.053535514 | ACAD10     | yellow | 0.049243 | 0.811194 |
| CEBPA    | yellow | 0.179617 | 0.379943 | DVL3     | yellow | -0.373745702 | 0.054807867 | NBP11      | yellow | 0.053519 | 0.795126 |
| SYN1     | yellow | -0.17948 | 0.380318 | MNT      | yellow | -0.372363786 | 0.055781966 | UBE2L3     | yellow | 0.053953 | 0.793499 |
| TGS1     | yellow | -0.17796 | 0.384426 | CHPF     | yellow | -0.372187881 | 0.055906924 | KIAA0146   | yellow | 0.054243 | 0.792416 |
| NCKAP1L  | yellow | -0.17788 | 0.384651 | PRKAR1A  | yellow | -0.370461162 | 0.057145182 | LRRK1      | yellow | 0.055216 | 0.788774 |
| APRT     | yellow | 0.177559 | 0.385518 | MAP2K5   | yellow | -0.370448338 | 0.057154457 | SMARCA4    | yellow | 0.05574  | 0.786814 |
| SGK196   | yellow | -0.17717 | 0.386566 | ABL2     | yellow | -0.370432177 | 0.057166148 | FAM91A1    | yellow | 0.056587 | 0.783648 |
| GATM     | yellow | -0.17715 | 0.386625 | BCOR     | yellow | -0.37023336  | 0.057310128 | DDI1       | yellow | 0.056905 | 0.782459 |
| EML3     | yellow | -0.17664 | 0.388021 | FAM109A  | yellow | -0.368343397 | 0.058692967 | MAST3      | yellow | 0.057261 | 0.781133 |
| OSCAR    | yellow | -0.17647 | 0.38849  | SRI      | yellow | -0.368059041 | 0.058903253 | AFG3L1P    | yellow | 0.058956 | 0.774816 |
| RABL2B   | yellow | 0.175612 | 0.390833 | M6PR     | yellow | -0.364931602 | 0.061254967 | CUL1       | yellow | 0.058963 | 0.774788 |
| MRPL9    | yellow | -0.17549 | 0.391154 | SEPW1    | yellow | -0.364554137 | 0.061543669 | KIAA1109   | yellow | 0.059643 | 0.772258 |
| IVD      | yellow | 0.175099 | 0.392241 | HEATR5B  | yellow | -0.364153036 | 0.061851606 | RNF139     | yellow | 0.059837 | 0.771536 |
| NEO1     | yellow | 0.174765 | 0.39316  | NUSAP1   | yellow | -0.364115701 | 0.061880329 | KIF3C      | yellow | 0.060271 | 0.769925 |
| MITF     | yellow | -0.1747  | 0.393326 | C16orf72 | yellow | -0.363738958 | 0.062170759 | UHRF1BP11  | yellow | 0.061185 | 0.76653  |
| MED1     | yellow | -0.17445 | 0.394035 | TROVE2   | yellow | -0.362360154 | 0.063242702 | PMM1       | yellow | 0.061622 | 0.764909 |
| ZFP36L2  | yellow | 0.173564 | 0.39647  | HMGAI1   | yellow | -0.361389244 | 0.064006088 | ACACA      | yellow | 0.062078 | 0.763216 |
| SNRPD2   | yellow | -0.17352 | 0.396594 | DNMT1    | yellow | -0.359576314 | 0.064540607 | SLC16A1    | yellow | 0.062326 | 0.762295 |
| HERC2P2  | yellow | -0.1734  | 0.396917 | ZNF428   | yellow | -0.358728674 | 0.066134587 | MTR        | yellow | 0.063079 | 0.759507 |
| CNNT1    | yellow | -0.17327 | 0.397273 | STIM1    | yellow | -0.357983591 | 0.066740363 | HSPA4      | yellow | 0.063085 | 0.759486 |
| TEN1     | yellow | 0.172706 | 0.398843 | SEC11C   | yellow | -0.357858534 | 0.066842458 | COPZ1      | yellow | 0.063395 | 0.758337 |
| NMT1     | yellow | -0.17264 | 0.399015 | ARID4B   | yellow | -0.352466013 | 0.071360687 | RPL4       | yellow | 0.064018 | 0.756033 |
| MRPL23   | yellow | -0.17146 | 0.402318 | QARS     | yellow | -0.350322644 | 0.073220383 | ELP3       | yellow | 0.067037 | 0.744897 |
| ZHHC21   | yellow | -0.17141 | 0.402449 | ACSL1    | yellow | -0.349535138 | 0.073912929 | DKC        | yellow | 0.067249 | 0.744115 |
| ZNF675   | yellow | 0.170444 | 0.405144 | UBE2H    | yellow | -0.348224263 | 0.07507686  | SLC19A1    | yellow | 0.067324 | 0.743838 |
| TNMI2    | yellow | -0.17028 | 0.40561  | TP53I3   | yellow | -0.348170121 | 0.075125233 | SIRPD      | yellow | 0.068995 | 0.737698 |
| SMC6     | yellow | -0.17014 | 0.405984 | MITF     | yellow | -0.347585135 | 0.075649411 | RNMTL1     | yellow | 0.06912  | 0.73724  |
| SPHK1    | yellow | 0.170127 | 0.40603  | UBE2Q2P1 | yellow | -0.346241459 | 0.076864016 | TBC1D24    | yellow | 0.069344 | 0.736415 |
| FAM195B  | yellow | -0.16867 | 0.410133 | CEBPG    | yellow | -0.345748733 | 0.077313129 | AURKAP51   | yellow | 0.069566 | 0.735604 |
| ITGA5    | yellow | 0.168078 | 0.411791 | ELK1     | yellow | -0.345542932 | 0.077501306 | ARL4EPL    | yellow | 0.070142 | 0.733493 |
| WDR46    | yellow | 0.167959 | 0.412128 | EZH2     | yellow | -0.345039492 | 0.07796311  | H56S21     | yellow | 0.071167 | 0.729738 |
| FOXN2    | yellow | -0.16783 | 0.412494 | SUGP2    | yellow | -0.344895432 | 0.078095641 | SLC33A1    | yellow | 0.071627 | 0.728057 |
| DES12    | yellow | -0.16782 | 0.412506 | GPHN     | yellow | -0.344776835 | 0.078204877 | STAU1      | yellow | 0.072383 | 0.725296 |
| TMEM18   | yellow | 0.167575 | 0.413211 | BRPF3    | yellow | -0.342986776 | 0.079867849 | ERVK13-1   | yellow | 0.07418  | 0.718742 |
| AIFM3    | yellow | 0.167452 | 0.413561 | ZNF777   | yellow | -0.34208021  | 0.080720269 | ATXN3      | yellow | 0.074536 | 0.717445 |
| SRSF5    | yellow | -0.16694 | 0.415015 | GNAI1    | yellow | -0.34051769  | 0.082205713 | ZBTB4      | yellow | 0.074927 | 0.716026 |
| LRR4C2   | yellow | -0.16692 | 0.415069 | YPS9D1   | yellow | -0.339155143 | 0.083517943 | ALKB35     | yellow | 0.075495 | 0.71396  |
| RAB11A   | yellow | -0.16676 | 0.415506 | HNRNP2   | yellow | -0.336667399 | 0.085954795 | SNORA30    | yellow | 0.075773 | 0.712952 |
| MGC72080 | yellow | -0.16576 | 0.418361 | RNF170   | yellow | -0.335447179 | 0.087169576 | NSUN2      | yellow | 0.075915 | 0.712437 |
| PTGFRN   | yellow | 0.16565  | 0.418674 | SNX29P2  | yellow | -0.334423044 | 0.088199143 | ABC2F      | yellow | 0.076852 | 0.709037 |
| ATOX1    | yellow | -0.1649  | 0.420814 | ZNF510   | yellow | -0.33319142  | 0.08944945  | SLC31A1    | yellow | 0.077949 | 0.705066 |
| PPP2R5C  | yellow | -0.16488 | 0.420861 | UFC1     | yellow | -0.330247364 | 0.092492394 | FBRS       | yellow | 0.078116 | 0.704461 |
| KPNAS    | yellow | -0.16395 | 0.42354  | AGPAT4   | yellow | -0.328861867 | 0.093951127 | KNTC1      | yellow | 0.078318 | 0.703729 |
| ATP5B    | yellow | -0.16317 | 0.425786 | ATG16L1  | yellow | -0.326641153 | 0.096325236 | PITPNB     | yellow | 0.078574 | 0.702806 |
| TMEM234  | yellow | 0.162945 | 0.426419 | AEN      | yellow | -0.32567057  | 0.09737689  | CRKL       | yellow | 0.079105 | 0.700887 |
| ASF1B    | yellow | -0.16258 | 0.427463 | TIMM8B   | yellow | -0.325651439 | 0.097397705 | CC2D1A     | yellow | 0.080987 | 0.694105 |
| ZNF740   | yellow | -0.162   | 0.429152 | TTC33    | yellow | -0.324169884 | 0.099019843 | SCARN18    | yellow | 0.081881 | 0.690891 |
| TTC17    | yellow | -0.16177 | 0.429814 | RSF1     | yellow | -0.32284259  | 0.100490188 | AIG1       | yellow | 0.08399  | 0.683327 |
| HSBP1    | yellow | -0.15989 | 0.435256 | FAM126A  | yellow | -0.321330197 | 0.102185414 | TMEM19     | yellow | 0.084031 | 0.683183 |
| WDR37    | yellow | 0.159811 | 0.43549  | SRSF5    | yellow | -0.318637509 | 0.105256339 | TACC1      | yellow | 0.084681 | 0.680856 |
| AKAP11   | yellow | -0.15971 | 0.435786 | MT2A     | yellow | -0.318047558 | 0.105938239 | KIAA1033   | yellow | 0.086006 | 0.676126 |
| ANAPC5   | yellow | -0.15916 | 0.437382 | TMEM140  | yellow | -0.317830441 | 0.106190021 | IER5       | yellow | 0.086352 | 0.674895 |
| TRHDE    | yellow | -0.15898 | 0.437899 | RRN3P2   | yellow | -0.315160102 | 0.109323225 | NECAP1     | yellow | 0.088943 | 0.665688 |
| FAM126B  | yellow | -0.15888 | 0.438201 | RREB1    | yellow | -0.312287139 | 0.112770202 | TMEM245    | yellow | 0.089864 | 0.662425 |
| TOR1B    | yellow | -0.15845 | 0.439468 | GSE1     | yellow | -0.311675172 | 0.113514707 | GLTSCR1    | yellow | 0.090122 | 0.661513 |
| RPL27    | yellow | 0.158318 | 0.439845 | INIP     | yellow | -0.308634063 | 0.112768412 | NFXL1      | yellow | 0.090664 | 0.659597 |
| SETD7    | yellow | -0.15825 | 0.440045 | MPP5     | yellow | -0.308031379 | 0.118023045 | UBE2V1     | yellow | 0.091198 | 0.657712 |
| DOCK10   | yellow | -0.15748 | 0.442293 | HMGNI1   | yellow | -0.307840691 | 0.118262552 | HSPA6      | yellow | 0.091241 | 0.657558 |
| MKL1     | yellow | 0.157479 | 0.442304 | ZNF775   | yellow | -0.30767298  | 0.118473495 | FBXO4      | yellow | 0.091663 | 0.656607 |
| PDC13    | yellow | 0.156803 | 0.44429  | TIMM17A  | yellow | -0.30374579  | 0.123492508 | HDLBP1     | yellow | 0.093017 | 0.651304 |
| FAM122B  | yellow | 0.156178 | 0.44613  | MMP10    | yellow | -0.301130259 | 0.126920502 | RPS6KB     | yellow | 0.093064 | 0.651138 |
| HIPK1    | yellow | 0.156027 | 0.446575 | GDCH     | yellow | -0.300997289 | 0.127096615 | PURB       | yellow | 0.093372 | 0.650056 |
| RBM5     | yellow | -0.15578 | 0.447307 | C17orf75 | yellow | -0.300757294 | 0.127414926 | YIPF6      | yellow | 0.09338  | 0.650029 |
| CAMLG    | yellow | 0.155126 | 0.449237 | APP      | yellow | -0.300355203 | 0.127949533 | UBE2O      | yellow | 0.0937   | 0.648903 |
| KPTN     | yellow | 0.154723 | 0.45043  | SFMBT1   | yellow | -0.296701137 | 0.132883084 | MCMBP      | yellow | 0.093729 | 0.648803 |
| KIAA1967 | yellow | 0.154594 | 0.450814 | ZHHC7    | yellow | -0.29520846  | 0.134937672 | ASPHD2     | yellow | 0.094769 | 0.645157 |
| KLF11    | yellow | -0.15453 | 0.451005 | TBC1D4   | yellow | -0.29491201  | 0.135348446 | TXNRD3     | yellow | 0.095213 | 0.643601 |
| AAGAB    | yellow | -0.15435 | 0.451524 | SLA      | yellow | -0.293894784 | 0.136764848 | PAN3       | yellow | 0.097901 | 0.634222 |
| IP6K1    | yellow | -0.1533  | 0.454666 | STX12    | yellow | -0.291800244 | 0.13971506  | FBXO21     | yellow | 0.098248 | 0.633015 |
| BRI3BP   | yellow | 0.153145 | 0.45512  | CCDC22   | yellow | -0.28866738  | 0.144213136 | RNF130     | yellow | 0.09827  | 0.632936 |
| AIG1     | yellow | 0.152463 | 0.457153 | METTL23  | yellow | -0.287082062 | 0.146528562 | XPC        | yellow | 0.100289 | 0.625936 |
| TYROBP   | yellow | 0.151867 | 0.458935 | PMPCA    | yellow | -0.285420458 | 0.148983923 | FUT8       | yellow | 0.101279 | 0.62251  |
| DOCK8    | yellow | -0.15162 | 0.459689 | KIF3B    | yellow | -0.283752538 | 0.151478117 | TCOF1      | yellow | 0.101322 | 0.622364 |
| SERPINA9 | yellow | -0.15157 | 0.45982  | SLC2A9   | yellow | -0.282912322 | 0.152745809 | DHX15      | yellow | 0.101779 | 0.620786 |
| LRR3     | yellow | -0.15144 | 0.460201 | KIF13A   | yellow | -0.280243956 | 0.156821953 | TMEM187    | yellow | 0.102782 | 0.61733  |
| HARS     | yellow | -0.15124 | 0.460808 | VGLL3    | yellow | -0.27820732  | 0.159984725 | PRPSAF2    | yellow | 0.103548 | 0.614697 |
| GTPBP4   | yellow | -0.15102 | 0.461478 | SGSH     | yellow | -0.274696174 | 0.165543102 | CLTC       | yellow | 0.10454  | 0.611291 |
| ZNF10    | yellow | -0.15091 | 0.461795 | SLC25A26 | yellow | -0.274193965 | 0.166349139 | CETN2      | yellow | 0.105045 | 0.60956  |
| GYS1     | yellow | 0.150754 | 0.462273 | ERCC5    | yellow | -0.268046272 | 0.17644123  | ZGPAT      | yellow | 0.105239 | 0.608898 |
| MAPK3    | yellow | -0.15041 | 0.463297 | TUBGCP6  | yellow | -0.267017642 | 0.178170748 | TIFAB      | yellow | 0.106302 | 0.605263 |
| TMEM52B  | yellow | 0.150384 | 0.463386 | BANP     | yellow | -0.266179727 | 0.179588325 | IREB2      | yellow | 0.108325 | 0.598373 |
| CCDC57   | yellow | -0.15    | 0.464545 | C9orf114 | yellow | -0.261602754 | 0.187470506 | ATP5I      | yellow | 0.108987 | 0.596127 |
| NDUFA3   | yellow | 0.149962 | 0.464654 | NUP93    | yellow | -0.261418081 | 0.187793487 | CDC14A     | yellow | 0.110578 | 0.590741 |
| ZNF143   | yellow | -0.14926 | 0.466767 | PPP4R1L  | yellow | -0.260554686 | 0.189308619 | FTO        | yellow | 0.111547 | 0.58747  |
| C9orf78  | yellow | 0.148737 | 0.468353 | AURKAIP1 | yellow | -0.253203061 | 0.202336577 | CD58       | yellow | 0.112342 | 0.584794 |
| NUDC     | yellow | 0.147396 | 0.472416 | RPS25    | yellow | -0.242422357 | 0.223097531 | PGPEP1     | yellow | 0.113458 | 0.581046 |
| PLBD1    | yellow | -0.14704 | 0.473506 | USP21    | yellow | -0.238381288 | 0.231146667 | DOPEY1     | yellow | 0.113712 | 0.580194 |
| CPSF1    | yellow | -0.14676 | 0.474358 | TMEM173  | yellow | -0.234626991 | 0.238796013 | EIF4ENIF1  | yellow | 0.114695 | 0.576901 |
| WIPI2    | yellow | 0.146694 | 0.474553 | STK11    | yellow | -0.231837231 | 0.244587451 | L3HYPDH    | yellow | 0.117863 | 0.566353 |
| ESCCR    | yellow | -0.14651 | 0.47511  | NBPF9    | yellow | -0.231420954 | 0.24545949  | CWC27      | yellow | 0.118299 |          |

Table 6. Gene module membership and correlation with growth rate (48/72h), with adjusted p values for each module

|           |        |          |          |            |        |              |             |            |        |          |          |
|-----------|--------|----------|----------|------------|--------|--------------|-------------|------------|--------|----------|----------|
| ZDHC3     | yellow | -0.14544 | 0.478382 | CPEB3      | yellow | -0.209390103 | 0.294539357 | MGST2      | yellow | 0.125725 | 0.540549 |
| GCFC1     | yellow | -0.14518 | 0.479167 | RNASEH2A   | yellow | -0.207625048 | 0.298720857 | ROCK2      | yellow | 0.128057 | 0.533004 |
| GIMAP4    | yellow | 0.145137 | 0.479307 | CRTC3      | yellow | -0.20743408  | 0.299175488 | GATAD1     | yellow | 0.128289 | 0.532258 |
| LEPRE1    | yellow | -0.14508 | 0.47948  | SOWAHC     | yellow | -0.201657961 | 0.313130988 | C9orf78    | yellow | 0.128914 | 0.530243 |
| ZNF706    | yellow | -0.14502 | 0.479671 | EHF        | yellow | -0.198102027 | 0.321918989 | SEC23A     | yellow | 0.131404 | 0.522262 |
| EV15      | yellow | -0.14485 | 0.480179 | TNFRSF12A  | yellow | -0.191258529 | 0.339251969 | PPWD1      | yellow | 0.131625 | 0.521556 |
| NUP160    | yellow | -0.14465 | 0.480785 | RPS14      | yellow | -0.187900236 | 0.347959216 | PAM        | yellow | 0.131758 | 0.521133 |
| OSBP11    | yellow | -0.1443  | 0.481869 | SNX18      | yellow | -0.18403391  | 0.358147078 | ZNF684     | yellow | 0.132169 | 0.519821 |
| PTGS1     | yellow | 0.143903 | 0.483089 | PSMG3      | yellow | -0.182037575 | 0.363475664 | HIBADH     | yellow | 0.132651 | 0.518288 |
| FBXO31    | yellow | 0.143866 | 0.483205 | SAR1B      | yellow | -0.17999753  | 0.368968711 | CCDC47     | yellow | 0.132733 | 0.518027 |
| HLA-DMA   | yellow | -0.14333 | 0.484841 | ARG2       | yellow | -0.178871899 | 0.372020224 | ARSD       | yellow | 0.133186 | 0.516585 |
| ALG14     | yellow | -0.14273 | 0.486691 | DOT1L      | yellow | -0.178394594 | 0.373318586 | TPP2       | yellow | 0.135064 | 0.510635 |
| CHD8      | yellow | 0.142386 | 0.487764 | CLUU10S    | yellow | -0.1666423   | 0.406110509 | MIB1       | yellow | 0.135904 | 0.507987 |
| PPP3CA    | yellow | -0.14099 | 0.492098 | CD37       | yellow | -0.163380642 | 0.415488892 | KARS       | yellow | 0.137913 | 0.501675 |
| USP6NL    | yellow | -0.14067 | 0.493093 | TCTN1      | yellow | -0.160220192 | 0.42468965  | SCNM1      | yellow | 0.139452 | 0.496867 |
| FCHSD2    | yellow | 0.140467 | 0.493707 | MICAL1     | yellow | -0.155377223 | 0.439002904 | THAP10     | yellow | 0.141016 | 0.492004 |
| SNAPC3    | yellow | -0.14036 | 0.494042 | SMYD4      | yellow | -0.147041334 | 0.464236931 | BIRC2      | yellow | 0.141395 | 0.490828 |
| STRBP     | yellow | -0.13967 | 0.49618  | WAC        | yellow | -0.139678888 | 0.487138372 | CEP76      | yellow | 0.141788 | 0.489613 |
| UGL3      | yellow | -0.13928 | 0.49739  | GTPBP4     | yellow | -0.134681122 | 0.503003958 | GPBP1      | yellow | 0.141796 | 0.489586 |
| OSBP      | yellow | -0.13881 | 0.498861 | ARHGAP12   | yellow | -0.133787898 | 0.505866255 | RAB1F      | yellow | 0.142318 | 0.487974 |
| NOSIP     | yellow | 0.138784 | 0.498951 | ADCK4      | yellow | -0.128635622 | 0.522532029 | TRIM66     | yellow | 0.142526 | 0.487333 |
| CD36      | yellow | -0.13817 | 0.500872 | SOX4       | yellow | -0.121470595 | 0.546139577 | HP55       | yellow | 0.142942 | 0.486049 |
| PGAP3     | yellow | 0.13803  | 0.501307 | HELZ2      | yellow | -0.119918267 | 0.551318769 | SYCL3      | yellow | 0.143774 | 0.483486 |
| NDUF55    | yellow | 0.137976 | 0.501478 | BLOC1S1    | yellow | -0.119479209 | 0.552787743 | DDX39A     | yellow | 0.146324 | 0.47568  |
| SFT2D3    | yellow | -0.13666 | 0.505597 | KIF16B     | yellow | -0.110999754 | 0.581505067 | PDLM5      | yellow | 0.146832 | 0.474133 |
| PPDF      | yellow | 0.136469 | 0.506205 | EVL        | yellow | -0.098100409 | 0.626399178 | G6PC3      | yellow | 0.147094 | 0.473334 |
| HIRA      | yellow | -0.13638 | 0.506489 | TBX19      | yellow | -0.059953192 | 0.766426699 | HSPD1      | yellow | 0.14796  | 0.470707 |
| GNB1      | yellow | 0.136034 | 0.507576 | PDCD5      | yellow | -0.059026644 | 0.769940111 | LOC84989   | yellow | 0.148546 | 0.46893  |
| SEL1L3    | yellow | -0.13582 | 0.508238 | PSMB1      | yellow | -0.037408187 | 0.853036567 | PBX2       | yellow | 0.148654 | 0.468604 |
| MAP1LC3A  | yellow | 0.13569  | 0.508661 | SRA1       | yellow | -0.023411307 | 0.907725415 | PRPF38B    | yellow | 0.148955 | 0.467693 |
| C10orf137 | yellow | -0.13544 | 0.509461 | FHL3       | yellow | -0.019874789 | 0.921618508 | PTDSS2     | yellow | 0.151036 | 0.461427 |
| FOXP4     | yellow | 0.135411 | 0.509539 | STOML1     | yellow | -0.015218264 | 0.939945169 | BTBD9      | yellow | 0.151475 | 0.460109 |
| SHKBP1    | yellow | 0.134994 | 0.510858 | PSMF1      | yellow | 0.001212748  | 0.995209988 | BECN1      | yellow | 0.152638 | 0.456631 |
| SLC9A3R2  | yellow | -0.13468 | 0.511845 | PKK        | yellow | 0.002962258  | 0.98830025  | CIR1       | yellow | 0.152834 | 0.456048 |
| GBP4      | yellow | -0.13444 | 0.512621 | USP7       | yellow | 0.006892051  | 0.972783161 | ADAM17     | yellow | 0.1531   | 0.455255 |
| VLDLR     | yellow | 0.132791 | 0.51784  | TAF15      | yellow | 0.010932944  | 0.956837514 | MTPAP      | yellow | 0.153569 | 0.453857 |
| BRCA2     | yellow | -0.13272 | 0.518077 | IL17RA     | yellow | 0.024351619  | 0.904035718 | FAM204A    | yellow | 0.154213 | 0.451944 |
| SNORA47   | yellow | -0.13266 | 0.518253 | ARL3       | yellow | 0.034893724  | 0.862819736 | ZER1       | yellow | 0.15453  | 0.451004 |
| HAX1      | yellow | -0.13182 | 0.520934 | STIL       | yellow | 0.037015726  | 0.85462177  | FASTKD2    | yellow | 0.156138 | 0.446248 |
| Xcorf26   | yellow | 0.131044 | 0.523411 | CASP2      | yellow | 0.054954903  | 0.78543163  | POLR3K     | yellow | 0.157748 | 0.441513 |
| FBXO10    | yellow | -0.13044 | 0.525352 | PKD2       | yellow | 0.057361313  | 0.776266055 | LCORL      | yellow | 0.158668 | 0.438821 |
| TINM21    | yellow | -0.1302  | 0.526105 | BRAP       | yellow | 0.058746699  | 0.771002518 | FNDCA3     | yellow | 0.160722 | 0.432841 |
| ARMC8     | yellow | 0.130154 | 0.526263 | NFATC2IP   | yellow | 0.064229278  | 0.750217318 | SPLL2A     | yellow | 0.162088 | 0.428889 |
| SETD9     | yellow | -0.13008 | 0.526498 | PNPLA6     | yellow | 0.066951233  | 0.740040479 | TPK1       | yellow | 0.162186 | 0.428605 |
| TBC1D1    | yellow | -0.12984 | 0.527256 | C5orf25    | yellow | 0.067910227  | 0.736446108 | BMS1P4     | yellow | 0.162616 | 0.427367 |
| IQGAP2    | yellow | -0.12969 | 0.527746 | MCM6       | yellow | 0.073757785  | 0.71464855  | NR2C2AP    | yellow | 0.162818 | 0.426784 |
| MSANTD2   | yellow | -0.1295  | 0.528369 | MIPEP      | yellow | 0.075017029  | 0.709982338 | ATP5G2     | yellow | 0.163034 | 0.426164 |
| HAU55     | yellow | -0.12911 | 0.529599 | SYNGR2     | yellow | 0.079543384  | 0.693294797 | TNFAIP8    | yellow | 0.163157 | 0.42581  |
| CNPY3     | yellow | 0.129099 | 0.52965  | AUH        | yellow | 0.088368177  | 0.661164329 | FAM21C     | yellow | 0.164396 | 0.422254 |
| LHPP      | yellow | -0.1287  | 0.530943 | ALG13      | yellow | 0.088985686  | 0.65893701  | STT3A      | yellow | 0.165498 | 0.419108 |
| TECPR2    | yellow | 0.128696 | 0.530947 | DCLRE1B    | yellow | 0.089210346  | 0.658127378 | KIF27      | yellow | 0.165645 | 0.418691 |
| CD163     | yellow | 0.12765  | 0.534318 | DNAIC4     | yellow | 0.091697336  | 0.649190031 | UBE2E1     | yellow | 0.166469 | 0.416346 |
| RAD23B    | yellow | 0.127598 | 0.534486 | CNRY       | yellow | 0.093176787  | 0.643895719 | C1orf233   | yellow | 0.166889 | 0.415155 |
| ZNF302    | yellow | -0.12713 | 0.53599  | ABTB1      | yellow | 0.097556866  | 0.628321266 | LRMP       | yellow | 0.167597 | 0.41315  |
| CNRY      | yellow | 0.125941 | 0.539849 | MTF2       | yellow | 0.101337358  | 0.615002227 | VPS25      | yellow | 0.168655 | 0.410164 |
| RNF123    | yellow | 0.125791 | 0.540337 | METTL18    | yellow | 0.106112532  | 0.598347979 | MMD        | yellow | 0.169471 | 0.407871 |
| CORO1B    | yellow | 0.124919 | 0.543171 | NXP2       | yellow | 0.106271368  | 0.597797327 | BRAF       | yellow | 0.16959  | 0.407536 |
| ASB3      | yellow | -0.12438 | 0.544916 | TMEM184C   | yellow | 0.108503538  | 0.590081836 | THAP1      | yellow | 0.171201 | 0.403028 |
| SPATS2L   | yellow | -0.12393 | 0.546378 | COX10      | yellow | 0.115507202  | 0.566158236 | APEH       | yellow | 0.173201 | 0.397472 |
| NCAPH2    | yellow | -0.1234  | 0.548117 | CRTC2      | yellow | 0.116818199  | 0.561729115 | SETD6      | yellow | 0.174414 | 0.394124 |
| RNF2      | yellow | -0.12284 | 0.549969 | CLN8       | yellow | 0.119725679  | 0.551962897 | CCNT2      | yellow | 0.174574 | 0.393685 |
| GPX7      | yellow | 0.12281  | 0.550051 | BTAF1      | yellow | 0.120251615  | 0.550204676 | GTPBP5     | yellow | 0.176489 | 0.388433 |
| LGR4      | yellow | 0.121881 | 0.553095 | ANXA4      | yellow | 0.123568323  | 0.539176888 | SRSF6      | yellow | 0.176819 | 0.387533 |
| KIAA1524  | yellow | -0.12174 | 0.553572 | LGAL59     | yellow | 0.123652502  | 0.538898358 | IARS       | yellow | 0.176887 | 0.387347 |
| DHX29     | yellow | -0.12151 | 0.554298 | TMEM134    | yellow | 0.12366588   | 0.538854101 | GALNT4     | yellow | 0.17846  | 0.383073 |
| CD6C      | yellow | -0.12124 | 0.5552   | MRPL2      | yellow | 0.123920178  | 0.53801313  | DNA2       | yellow | 0.1799   | 0.379182 |
| KIAA1598  | yellow | -0.12115 | 0.555506 | PLCB2      | yellow | 0.125494188  | 0.532821632 | CPD        | yellow | 0.180304 | 0.378093 |
| NBP9F     | yellow | 0.120961 | 0.55612  | CCZ1       | yellow | 0.129559343  | 0.519524774 | GSK3A      | yellow | 0.180735 | 0.376937 |
| PTPLB     | yellow | 0.120224 | 0.558546 | SLC29A3    | yellow | 0.138500713  | 0.490855517 | TAB2       | yellow | 0.181882 | 0.373863 |
| C9orf64   | yellow | -0.12019 | 0.558671 | TEN1       | yellow | 0.138869089  | 0.489691757 | ARID3B     | yellow | 0.182327 | 0.372676 |
| ABCA2     | yellow | 0.119851 | 0.559775 | ATXN7L3B   | yellow | 0.139576051  | 0.487462254 | SNAP23     | yellow | 0.182698 | 0.371688 |
| LOC728377 | yellow | -0.11959 | 0.560647 | SNAPIN     | yellow | 0.142577002  | 0.4780559   | METTL9     | yellow | 0.183026 | 0.370814 |
| VASP      | yellow | 0.119452 | 0.561091 | ZNF140     | yellow | 0.150401515  | 0.45397516  | ATP11B     | yellow | 0.183491 | 0.369578 |
| SERPINB8  | yellow | -0.11941 | 0.561234 | C5orf43    | yellow | 0.150524051  | 0.453603228 | THTPA      | yellow | 0.183574 | 0.36936  |
| RBOF2     | yellow | 0.119331 | 0.561493 | WDR35      | yellow | 0.150863565  | 0.452573547 | SORT1      | yellow | 0.183957 | 0.368343 |
| MED22     | yellow | -0.11816 | 0.565364 | C22orf32   | yellow | 0.151471039  | 0.450734291 | PDE12      | yellow | 0.184105 | 0.367953 |
| CHMP2A    | yellow | -0.11754 | 0.567429 | INTS9      | yellow | 0.152773813  | 0.446803297 | MXI1       | yellow | 0.184827 | 0.366045 |
| MALT1     | yellow | -0.11736 | 0.568019 | CD33       | yellow | 0.153651873  | 0.444164199 | FBXO48     | yellow | 0.184944 | 0.365735 |
| ASUN      | yellow | -0.11685 | 0.569717 | FAN1       | yellow | 0.157550515  | 0.432547898 | POGK       | yellow | 0.186174 | 0.362499 |
| COX7A2L   | yellow | 0.116718 | 0.570154 | IVNS1ABP   | yellow | 0.160624631  | 0.423506045 | ZNF33A     | yellow | 0.186438 | 0.361806 |
| ATP10D    | yellow | -0.11577 | 0.573304 | MFS07      | yellow | 0.160627393  | 0.423497969 | LOC1005061 | yellow | 0.188787 | 0.355681 |
| ZNF254    | yellow | -0.11533 | 0.574772 | FUCA2      | yellow | 0.168338687  | 0.401280122 | KEL        | yellow | 0.189147 | 0.354745 |
| SH3G11    | yellow | -0.11505 | 0.575706 | PMS2CL     | yellow | 0.169475288  | 0.398061895 | SPCS2      | yellow | 0.189947 | 0.352678 |
| CRTC1     | yellow | 0.114764 | 0.57667  | C10orf12   | yellow | 0.172230319  | 0.390322025 | CAMLG      | yellow | 0.190655 | 0.350852 |
| CDIPT     | yellow | -0.11452 | 0.577499 | SMAP1      | yellow | 0.181966288  | 0.363666797 | UPF3B      | yellow | 0.191173 | 0.349518 |
| IFI30     | yellow | -0.11451 | 0.577534 | DECR2      | yellow | 0.183354866  | 0.359954371 | HSPA1A     | yellow | 0.191219 | 0.349401 |
| COASY     | yellow | 0.114018 | 0.579169 | MRPL10     | yellow | 0.185354801  | 0.354646877 | MRS15      | yellow | 0.192382 | 0.346423 |
| IGFBP2    | yellow | -0.11239 | 0.584631 | EXOC4      | yellow | 0.193399151  | 0.333770967 | TMEM161A   | yellow | 0.192484 | 0.346163 |
| COX4I1    | yellow | 0.111483 | 0.587687 | C21orf91   | yellow | 0.194267104  | 0.331563963 | C21orf91   | yellow | 0.192528 | 0.34605  |
| RPL13     | yellow | 0.110989 | 0.589353 | WDR70      | yellow | 0.196346301  | 0.326313163 | IMPAD1     | yellow | 0.192822 | 0.345301 |
| YIPF3     | yellow | 0.11072  | 0.590261 | C14orf166  | yellow | 0.19962682   | 0.31813235  | DCPS       | yellow | 0.193178 | 0.344393 |
| UMPS      | yellow | -0.11054 | 0.590875 | LOC1001290 | yellow | 0.20079561   | 0.315248424 | LEM3D      | yellow | 0.193561 | 0.343419 |
| CTDNEP1   | yellow | 0.110435 | 0.591225 | FAM21C     | yellow | 0.201140646  | 0.314400158 | FAM134B    | yellow | 0.194035 | 0.342215 |
| FCGR3A    | yellow | 0.110044 | 0.592547 | CDC40      | yellow | 0.205259558  | 0.304382826 | LNX2       | yellow | 0.19466  |          |

Table 6. Gene module membership and correlation with growth rate (48/72h), with adjusted p values for each module

|           |        |          |          |           |        |             |             |            |        |          |          |
|-----------|--------|----------|----------|-----------|--------|-------------|-------------|------------|--------|----------|----------|
| NELF      | yellow | -0.10731 | 0.601826 | ITPK1     | yellow | 0.217279011 | 0.276302602 | ATG16L2    | yellow | 0.204548 | 0.316175 |
| TMX1      | yellow | -0.10535 | 0.608505 | MR1       | yellow | 0.217484867 | 0.275836625 | NICN1      | yellow | 0.205428 | 0.314053 |
| RTEL1     | yellow | 0.105205 | 0.609012 | TMEM41A   | yellow | 0.218045837 | 0.274569366 | LOC387647  | yellow | 0.206434 | 0.311636 |
| ZNF84     | yellow | -0.10519 | 0.609079 | GPX3      | yellow | 0.218974163 | 0.272480441 | TBC1D23    | yellow | 0.206633 | 0.31116  |
| HVCN1     | yellow | -0.10513 | 0.60927  | SEC14L1   | yellow | 0.221418749 | 0.267028566 | MAP1LC3B   | yellow | 0.207202 | 0.309799 |
| WDFY3     | yellow | 0.103701 | 0.614169 | SLC30A1   | yellow | 0.223848705 | 0.26167959  | NFATC2IP   | yellow | 0.20788  | 0.308183 |
| ATP6AP1   | yellow | 0.103675 | 0.614258 | PCED1A    | yellow | 0.224697944 | 0.259826697 | SMG1       | yellow | 0.208944 | 0.305658 |
| UBR1      | yellow | -0.10363 | 0.614411 | EDC3      | yellow | 0.225082445 | 0.258990595 | FZD1       | yellow | 0.211418 | 0.299837 |
| E2F1      | yellow | -0.1025  | 0.618296 | TARSL2    | yellow | 0.226904199 | 0.255052958 | PIGC       | yellow | 0.212563 | 0.297165 |
| KIF1C     | yellow | 0.102386 | 0.618695 | INO80     | yellow | 0.227023797 | 0.254795827 | MESDC2     | yellow | 0.214399 | 0.292914 |
| TRA2B     | yellow | 0.101808 | 0.620684 | XYLT2     | yellow | 0.228087611 | 0.252516113 | ZNF75A     | yellow | 0.214633 | 0.292375 |
| ALDH3A2   | yellow | -0.10149 | 0.621787 | DNASE2B   | yellow | 0.230115631 | 0.248207204 | DBNL       | yellow | 0.214706 | 0.292206 |
| LOC440173 | yellow | 0.101123 | 0.623049 | ACOT7     | yellow | 0.230605518 | 0.247173631 | HBEFG      | yellow | 0.215329 | 0.290775 |
| SRA1      | yellow | -0.10043 | 0.625463 | TRANK1    | yellow | 0.231918676 | 0.244417076 | ZNF546     | yellow | 0.215966 | 0.289316 |
| CAPG      | yellow | -0.09986 | 0.627415 | MRPL4     | yellow | 0.232584295 | 0.243027587 | MRPS21     | yellow | 0.21654  | 0.288005 |
| COQ4      | yellow | -0.09951 | 0.628632 | MRPS22    | yellow | 0.232704001 | 0.242778253 | RBM47      | yellow | 0.217524 | 0.285766 |
| HSD3B7    | yellow | 0.099451 | 0.628837 | GPS1      | yellow | 0.241479933 | 0.224957623 | RP2        | yellow | 0.217895 | 0.284925 |
| KIAA1467  | yellow | 0.099145 | 0.6299   | EIF4EBP2  | yellow | 0.248827656 | 0.21072891  | MLH1       | yellow | 0.218036 | 0.284606 |
| DNAC19    | yellow | -0.09817 | 0.633279 | ARPC2     | yellow | 0.249811154 | 0.20887185  | CELF6      | yellow | 0.221426 | 0.276995 |
| ZNF165    | yellow | -0.09808 | 0.63359  | MED31     | yellow | 0.24995322  | 0.208604523 | VLDLR      | yellow | 0.221562 | 0.276694 |
| SNORA68   | yellow | -0.09787 | 0.634324 | QSER1     | yellow | 0.252502658 | 0.203846751 | ABCA3      | yellow | 0.222538 | 0.274529 |
| TMEM160   | yellow | -0.09744 | 0.635816 | SPIN4     | yellow | 0.253040327 | 0.202852894 | OSBP3      | yellow | 0.224465 | 0.270287 |
| SOAT1     | yellow | 0.096783 | 0.638116 | POC1B     | yellow | 0.253338046 | 0.202304    | HTRA2      | yellow | 0.225106 | 0.268884 |
| STAT5A    | yellow | -0.09665 | 0.638595 | ZNF271    | yellow | 0.257381673 | 0.194949357 | SSH2       | yellow | 0.225785 | 0.267405 |
| LONRF3    | yellow | 0.096433 | 0.639336 | KIAA0146  | yellow | 0.258649566 | 0.192681684 | PPP1R3D    | yellow | 0.225854 | 0.267254 |
| QRICH1    | yellow | 0.09643  | 0.639347 | PPP2C     | yellow | 0.26410909  | 0.183125101 | TMEM106C   | yellow | 0.22612  | 0.266678 |
| ANKRD11   | yellow | 0.096137 | 0.640371 | FAM32A    | yellow | 0.264327635 | 0.182749543 | MAX        | yellow | 0.228984 | 0.260503 |
| KCTD18    | yellow | -0.09611 | 0.64045  | MMS19     | yellow | 0.265001488 | 0.181594939 | EXOSC3     | yellow | 0.231489 | 0.25518  |
| FAM115A   | yellow | -0.09608 | 0.640586 | ZNF585A   | yellow | 0.270067761 | 0.173076623 | ENPP4      | yellow | 0.232165 | 0.253756 |
| GTF2E2    | yellow | -0.09517 | 0.643751 | PDE3B     | yellow | 0.272436319 | 0.169192183 | MANBA      | yellow | 0.234973 | 0.247897 |
| DCAF15    | yellow | 0.094878 | 0.644773 | PIP4K2B   | yellow | 0.273194413 | 0.167961633 | MEF2B      | yellow | 0.235809 | 0.246168 |
| MED18     | yellow | 0.094816 | 0.644991 | MTFP1     | yellow | 0.27498243  | 0.165084904 | EIF4A2     | yellow | 0.236662 | 0.244415 |
| VSIG4     | yellow | -0.0944  | 0.646447 | RAB38     | yellow | 0.275072595 | 0.164940765 | TFDP1      | yellow | 0.237645 | 0.242403 |
| FTH1      | yellow | 0.094074 | 0.647592 | RRAG4     | yellow | 0.275470538 | 0.164305675 | AMDHD2     | yellow | 0.240001 | 0.237626 |
| SAT1      | yellow | -0.09378 | 0.648635 | CHUK      | yellow | 0.275957073 | 0.163531547 | DCSTAMP    | yellow | 0.240383 | 0.236857 |
| PGBD2     | yellow | 0.092951 | 0.651535 | RNLS      | yellow | 0.278471327 | 0.159572205 | BET1       | yellow | 0.240892 | 0.235835 |
| LOC399753 | yellow | -0.09228 | 0.653907 | PARP6     | yellow | 0.280800327 | 0.155965735 | DUSP10     | yellow | 0.241568 | 0.234483 |
| AATF      | yellow | -0.09175 | 0.655748 | HSPBP1    | yellow | 0.281679697 | 0.154619237 | NAMPT      | yellow | 0.243333 | 0.230978 |
| SERF2     | yellow | 0.091645 | 0.656133 | RNMTL1    | yellow | 0.282005471 | 0.15412252  | ABCA2      | yellow | 0.243457 | 0.230733 |
| TUFT1     | yellow | 0.090428 | 0.66043  | PHPT1     | yellow | 0.282527327 | 0.153329203 | CASP10     | yellow | 0.244991 | 0.227715 |
| SPTLC2    | yellow | 0.090423 | 0.660448 | PEX13     | yellow | 0.282618763 | 0.153190503 | PDCD4      | yellow | 0.245473 | 0.226773 |
| PBRM1     | yellow | -0.08934 | 0.664287 | EED       | yellow | 0.288349662 | 0.144675054 | KLHDC2     | yellow | 0.247104 | 0.223603 |
| PYCARD    | yellow | -0.08927 | 0.664533 | NUDCD3    | yellow | 0.289062089 | 0.143640761 | SNRNAP48   | yellow | 0.247149 | 0.223516 |
| LIRC45    | yellow | 0.088822 | 0.666115 | RAB5C     | yellow | 0.295031105 | 0.135183314 | CD55       | yellow | 0.247995 | 0.221885 |
| ZNF511    | yellow | -0.08859 | 0.666948 | AIG1      | yellow | 0.296099393 | 0.133708599 | PKI55      | yellow | 0.251462 | 0.21528  |
| YTHDC1    | yellow | 0.088071 | 0.668779 | IMPAD1    | yellow | 0.30660169  | 0.119827475 | CSGALNACT  | yellow | 0.251642 | 0.21494  |
| JC1001306 | yellow | -0.08742 | 0.671106 | BAG4      | yellow | 0.307674904 | 0.118471073 | ZNF230     | yellow | 0.25288  | 0.212617 |
| SEPHS2    | yellow | -0.08686 | 0.673077 | NF2       | yellow | 0.309240549 | 0.116512612 | SAP30BP    | yellow | 0.255466 | 0.207819 |
| ESYT1     | yellow | 0.086196 | 0.675452 | KDSR      | yellow | 0.310454304 | 0.115010829 | SATB2      | yellow | 0.257818 | 0.203519 |
| TRAF4     | yellow | 0.085204 | 0.67899  | TMEM234   | yellow | 0.312167421 | 0.112915563 | DMXL2      | yellow | 0.259157 | 0.201098 |
| SIGLEC9   | yellow | -0.08437 | 0.681975 | TP53      | yellow | 0.314287887 | 0.110361335 | URGCP      | yellow | 0.25964  | 0.200229 |
| MAD1L1    | yellow | 0.084065 | 0.683059 | PPP2R4    | yellow | 0.317225013 | 0.106894464 | RAB2B      | yellow | 0.262697 | 0.194793 |
| SRGN      | yellow | -0.08405 | 0.683106 | IARS      | yellow | 0.317356149 | 0.106741588 | MMAA       | yellow | 0.265395 | 0.19008  |
| PNPT1     | yellow | 0.083896 | 0.683666 | STRADA    | yellow | 0.317428099 | 0.106657778 | CHMP5      | yellow | 0.266501 | 0.18817  |
| DISC1     | yellow | -0.08353 | 0.684976 | SPL3      | yellow | 0.320843305 | 0.102735684 | HNRNP41    | yellow | 0.268548 | 0.184672 |
| NT5C      | yellow | 0.083159 | 0.686302 | GNPNAT1   | yellow | 0.325089052 | 0.098011093 | AKAP8L     | yellow | 0.268963 | 0.183968 |
| SERINC3   | yellow | -0.08217 | 0.68984  | MATK      | yellow | 0.328471834 | 0.094364881 | SCARN9     | yellow | 0.269499 | 0.183062 |
| MAPRE1    | yellow | 0.081539 | 0.692119 | UBA3      | yellow | 0.328934459 | 0.093874271 | RAB5C      | yellow | 0.269645 | 0.182815 |
| DYNLRB1   | yellow | 0.081433 | 0.692501 | BSG       | yellow | 0.330301949 | 0.092435275 | PPP1R21    | yellow | 0.271157 | 0.180278 |
| DUS1L     | yellow | 0.081352 | 0.69279  | SPTLC2    | yellow | 0.332205883 | 0.090459546 | ZDBF2      | yellow | 0.271751 | 0.179287 |
| TNKS2     | yellow | -0.0811  | 0.693702 | OXSAM     | yellow | 0.333363442 | 0.089274019 | SLC4A1AP   | yellow | 0.272507 | 0.178034 |
| RAP1GAP2  | yellow | 0.080712 | 0.695093 | ZNF192    | yellow | 0.333860316 | 0.088768756 | HNRNPAB    | yellow | 0.276137 | 0.172095 |
| C3orf18   | yellow | 0.080315 | 0.696524 | C11orf73  | yellow | 0.335279695 | 0.087337323 | FAM210B    | yellow | 0.277492 | 0.169914 |
| SRC       | yellow | -0.08015 | 0.697134 | LIPA      | yellow | 0.336246435 | 0.086372423 | NUDT5      | yellow | 0.277634 | 0.169687 |
| FAU       | yellow | 0.080046 | 0.697493 | HNRNPD    | yellow | 0.337520974 | 0.085112684 | CHMP1B     | yellow | 0.281236 | 0.163989 |
| B3GALNT2  | yellow | -0.08    | 0.697651 | RNF216    | yellow | 0.337838327 | 0.084801194 | ING3       | yellow | 0.281396 | 0.163739 |
| ARL11     | yellow | -0.07999 | 0.6977   | COX6B1    | yellow | 0.339573167 | 0.083113675 | TDRD9      | yellow | 0.281495 | 0.163585 |
| ZNF558    | yellow | -0.07962 | 0.699039 | RPL15     | yellow | 0.342351879 | 0.080464102 | DCUN1D2    | yellow | 0.282628 | 0.161824 |
| BMPR2     | yellow | -0.07954 | 0.699324 | RPL26L1   | yellow | 0.34262698  | 0.080205331 | NOP10      | yellow | 0.285156 | 0.157944 |
| SP4       | yellow | -0.07935 | 0.700001 | ADCY7     | yellow | 0.345346551 | 0.077681196 | C10orf57   | yellow | 0.286217 | 0.156334 |
| PUM2      | yellow | 0.078646 | 0.702546 | R3HDM1    | yellow | 0.345762966 | 0.077300128 | C10orf11   | yellow | 0.291184 | 0.148958 |
| GID4      | yellow | -0.07853 | 0.702972 | SUMO2     | yellow | 0.349626086 | 0.073832691 | ZCCHC8     | yellow | 0.292709 | 0.146744 |
| SNR1B     | yellow | 0.077693 | 0.70599  | THAP7     | yellow | 0.34989691  | 0.073594159 | LOC1005067 | yellow | 0.294364 | 0.144367 |
| EP300     | yellow | -0.07717 | 0.707893 | MRPL39    | yellow | 0.34991757  | 0.073575987 | FBXO31     | yellow | 0.294429 | 0.144275 |
| PGD       | yellow | 0.07713  | 0.70803  | LMBR1L    | yellow | 0.352659889 | 0.071194279 | HSD17B7P2  | yellow | 0.29488  | 0.143632 |
| GLUD1     | yellow | 0.076817 | 0.709164 | FDXACB1   | yellow | 0.352918331 | 0.070972916 | ZNF669     | yellow | 0.295509 | 0.14274  |
| TMSB10    | yellow | 0.076168 | 0.711517 | IFT172    | yellow | 0.353321963 | 0.070628253 | MIS18BP1   | yellow | 0.299535 | 0.137121 |
| VPS25     | yellow | -0.07559 | 0.713598 | DPF2      | yellow | 0.356248517 | 0.068167644 | FAM162A    | yellow | 0.299813 | 0.136739 |
| ATF7IP2   | yellow | -0.07474 | 0.716722 | SFT2D1    | yellow | 0.362596707 | 0.063057784 | USF1       | yellow | 0.299967 | 0.136528 |
| DCUN1D1   | yellow | -0.07416 | 0.718817 | PRMT5     | yellow | 0.362729292 | 0.062954323 | TUG1       | yellow | 0.301557 | 0.13436  |
| ZC3H11A   | yellow | -0.07385 | 0.719953 | PCCA      | yellow | 0.364519381 | 0.061570305 | MFAP1      | yellow | 0.301862 | 0.133948 |
| COX20     | yellow | 0.073396 | 0.721598 | CDK5RAP2  | yellow | 0.364763195 | 0.061383642 | ZNF267     | yellow | 0.304363 | 0.130596 |
| RMRP      | yellow | -0.0732  | 0.722302 | HIF1AN    | yellow | 0.365474008 | 0.060841955 | LOC1005060 | yellow | 0.308063 | 0.12575  |
| NOL6      | yellow | 0.072941 | 0.723257 | ARRB2     | yellow | 0.36610091  | 0.060367303 | SCO2       | yellow | 0.308364 | 0.125362 |
| TMBIM1    | yellow | 0.072719 | 0.724067 | COMMD1    | yellow | 0.366616545 | 0.059979059 | TRIM39     | yellow | 0.308569 | 0.125098 |
| NSUNSP1   | yellow | -0.07259 | 0.724549 | MIEN1     | yellow | 0.367083855 | 0.059628881 | PORCN      | yellow | 0.309271 | 0.124197 |
| MYH9      | yellow | 0.072562 | 0.72464  | PPM1D     | yellow | 0.368686581 | 0.058439955 | FAM40A     | yellow | 0.309903 | 0.123389 |
| STAT3     | yellow | -0.07255 | 0.72469  | GTF3C4    | yellow | 0.372233585 | 0.055874436 | C7orf50    | yellow | 0.311496 | 0.121373 |
| NEDD8     | yellow | 0.071883 | 0.727121 | KDELR1    | yellow | 0.378098476 | 0.051826383 | ATPGV0E1   | yellow | 0.312229 | 0.120452 |
| LSM7      | yellow | -0.07128 | 0.729337 | RGCC      | yellow | 0.382175047 | 0.049150969 | PRR3       | yellow | 0.31266  | 0.119914 |
| H0XB6     | yellow | -0.07052 | 0.732102 | MTFMT     | yellow | 0.385984384 | 0.046750364 | SHKBP1     | yellow | 0.314249 | 0.117943 |
| MAP2K1    | yellow | -0.06997 | 0.734115 | PORCN     | yellow | 0.386244266 | 0.046590024 | CTDSP2     | yellow | 0.317457 | 0.114037 |
| CY5R4     | yellow | -0.06996 | 0.734175 | MAPK1IP1L | yellow | 0.38644103  | 0.046468916 | RTPA       | yellow | 0.318202 | 0.113144 |
| SLC25A51  | yellow | 0.068701 | 0.738777 | ELP5      | yellow | 0.388420614 | 0.0452642   |            |        |          |          |



Table 6. Gene module membership and correlation with growth rate (48/72h), with adjusted p values for each module

|           |        |          |          |
|-----------|--------|----------|----------|
| IMMP2L    | yellow | 0.031089 | 0.880164 |
| CCDC90A   | yellow | -0.03103 | 0.880392 |
| ATAT1     | yellow | 0.030842 | 0.881109 |
| PARP10    | yellow | -0.03042 | 0.882737 |
| ANXA7     | yellow | 0.030204 | 0.883551 |
| ENOSF1    | yellow | 0.029827 | 0.884996 |
| BAG2      | yellow | -0.0295  | 0.886233 |
| ARHGGEF18 | yellow | 0.029051 | 0.887968 |
| ACSS1     | yellow | 0.028873 | 0.88865  |
| ACOT1     | yellow | -0.02806 | 0.891757 |
| HNMT      | yellow | -0.02803 | 0.891879 |
| SS18      | yellow | -0.02789 | 0.892424 |
| ZNF259    | yellow | 0.026883 | 0.896284 |
| FAS       | yellow | -0.02666 | 0.897124 |
| C11orf57  | yellow | 0.025922 | 0.899972 |
| ARPC2     | yellow | 0.02571  | 0.900784 |
| RPP21     | yellow | 0.025481 | 0.901665 |
| ZNF654    | yellow | 0.025291 | 0.902397 |
| SLC38A6   | yellow | 0.024413 | 0.905768 |
| RTN4IP1   | yellow | -0.02435 | 0.905996 |
| MTX1      | yellow | -0.02398 | 0.907432 |
| CTSD      | yellow | 0.023642 | 0.908731 |
| BIRC6     | yellow | -0.02363 | 0.908786 |
| HY1       | yellow | -0.02312 | 0.910749 |
| TMLHE     | yellow | -0.02285 | 0.91178  |
| TM9SF4    | yellow | -0.02249 | 0.913171 |
| HLA-DRA   | yellow | 0.022329 | 0.913782 |
| NRF1      | yellow | 0.021882 | 0.915502 |
| ZNF766    | yellow | 0.021403 | 0.917344 |
| FBXO25    | yellow | -0.02077 | 0.91979  |
| SNHG5     | yellow | 0.020404 | 0.92119  |
| ABT1      | yellow | -0.01991 | 0.923104 |
| TRAPPC6A  | yellow | 0.019197 | 0.925838 |
| ZNF318    | yellow | 0.019164 | 0.925968 |
| DDX19B    | yellow | 0.018378 | 0.928996 |
| DCK       | yellow | -0.01798 | 0.930514 |
| C21orf33  | yellow | -0.01766 | 0.931755 |
| TCTA      | yellow | -0.0157  | 0.939315 |
| HIST1H2AK | yellow | 0.014461 | 0.944104 |
| HIST1H4H  | yellow | 0.01441  | 0.944302 |
| KATNB1    | yellow | 0.014181 | 0.945184 |
| QSOX1     | yellow | -0.0137  | 0.947054 |
| USF1      | yellow | -0.01352 | 0.947741 |
| THOC5     | yellow | 0.01294  | 0.949975 |
| CASP9     | yellow | -0.01267 | 0.95102  |
| TMEM150A  | yellow | 0.011925 | 0.953893 |
| WBP11     | yellow | 0.011916 | 0.953928 |
| AP3M1     | yellow | -0.01189 | 0.954048 |
| BTRC      | yellow | -0.01184 | 0.954231 |
| LANCL2    | yellow | 0.011678 | 0.954847 |
| FAM120A   | yellow | -0.01056 | 0.959159 |
| NR2C2AP   | yellow | 0.00994  | 0.961562 |
| TCEB1     | yellow | -0.0096  | 0.962871 |
| C9orf142  | yellow | 0.009507 | 0.963236 |
| PPP1R13L  | yellow | 0.008622 | 0.966657 |
| CYB5R2    | yellow | 0.008114 | 0.968622 |
| FOXRED1   | yellow | -0.00808 | 0.96875  |
| THRAP3    | yellow | -0.00801 | 0.969015 |
| EPRS      | yellow | 0.007998 | 0.969068 |
| TMEM141   | yellow | 0.007933 | 0.969321 |
| LAGE3     | yellow | -0.00729 | 0.971824 |
| FSD1L     | yellow | -0.00651 | 0.974811 |
| UBA52     | yellow | -0.00646 | 0.974996 |
| SIKE1     | yellow | 0.00642  | 0.975167 |
| LENG1     | yellow | 0.005039 | 0.980508 |
| TP53      | yellow | -0.00503 | 0.980553 |
| TOR3A     | yellow | 0.004697 | 0.981832 |
| DEF6      | yellow | -0.00456 | 0.982353 |
| NSMCE2    | yellow | -0.00386 | 0.985075 |
| TPT1      | yellow | -0.00353 | 0.98633  |
| PCM1      | yellow | -0.00342 | 0.986763 |
| DPP7      | yellow | 0.002389 | 0.990761 |
| DCAF4     | yellow | -0.0022  | 0.991487 |
| BCAS2     | yellow | -0.00136 | 0.994727 |
| AKT1      | yellow | 0.001202 | 0.995351 |
| OR6N2     | yellow | 0.000599 | 0.997681 |
| APOE      | yellow | -0.00025 | 0.999046 |

**Additional file 9: Table S6B. Genes with a significant association between growth rate and expression after FDR correction within modules.** Correlations are as indicated in Additional file 3: Table S3 and Additional file 7: Table S5. The yellow module itself (24h RPMs) is also significantly correlated with generation time.

| Hour | GeneID    | Module | Rsq      | Pvalue   | Padj     |
|------|-----------|--------|----------|----------|----------|
| 24Hr | RASSF2    | black  | -0.72918 | 1.60E-05 | 0.007295 |
| 24Hr | PDCD6IP   | black  | -0.68535 | 7.99E-05 | 0.016896 |
| 24Hr | PHF21A    | black  | -0.67532 | 0.000111 | 0.016896 |
| 2Hr  | WEE1      | orange | -0.62268 | 0.000681 | 0.028587 |
| 24Hr | TCF3      | yellow | -0.68096 | 9.25E-05 | 0.031354 |
| 24Hr | PDK1      | yellow | -0.67607 | 0.000108 | 0.031354 |
| 24Hr | BID       | yellow | -0.63818 | 0.000341 | 0.034359 |
| 24Hr | LDB1      | yellow | -0.63753 | 0.000348 | 0.034359 |
| 24Hr | MBD6      | yellow | -0.62719 | 0.000463 | 0.034359 |
| 24Hr | CMIP      | yellow | -0.61632 | 0.000619 | 0.034359 |
| 24Hr | STK25     | yellow | -0.61139 | 0.000704 | 0.034359 |
| 24Hr | ARSA      | yellow | -0.60679 | 0.000792 | 0.034359 |
| 24Hr | FASTKD5   | yellow | -0.60194 | 0.000894 | 0.034359 |
| 24Hr | NSRP1     | yellow | -0.58855 | 0.001241 | 0.034359 |
| 24Hr | FYTTD1    | yellow | -0.58582 | 0.001324 | 0.034359 |
| 24Hr | RAE1      | yellow | -0.58083 | 0.00149  | 0.034359 |
| 24Hr | DAXX      | yellow | -0.57995 | 0.00152  | 0.034359 |
| 24Hr | KLF10     | yellow | -0.57842 | 0.001575 | 0.034359 |
| 24Hr | TAF11     | yellow | -0.57681 | 0.001635 | 0.034359 |
| 24Hr | UBN1      | yellow | -0.57616 | 0.00166  | 0.034359 |
| 24Hr | PHIP      | yellow | -0.57598 | 0.001667 | 0.034359 |
| 24Hr | CDYL2     | yellow | -0.57347 | 0.001765 | 0.034359 |
| 24Hr | SIRT2     | yellow | -0.57131 | 0.001854 | 0.034359 |
| 24Hr | COA4      | yellow | -0.57038 | 0.001893 | 0.034359 |
| 24Hr | CCR1      | yellow | -0.56868 | 0.001967 | 0.034359 |
| 24Hr | ATXN1     | yellow | -0.56593 | 0.002092 | 0.034359 |
| 24Hr | CEBPB     | yellow | -0.5659  | 0.002093 | 0.034359 |
| 24Hr | ZNF431    | yellow | -0.56359 | 0.002203 | 0.034359 |
| 24Hr | AFG3L2    | yellow | -0.56228 | 0.002268 | 0.034359 |
| 24Hr | DNAJB2    | yellow | -0.56049 | 0.002359 | 0.034359 |
| 24Hr | PDIA4     | yellow | -0.55987 | 0.002391 | 0.034359 |
| 24Hr | CXCL2     | yellow | -0.5587  | 0.002453 | 0.034359 |
| 24Hr | CHMP1A    | yellow | -0.55752 | 0.002517 | 0.034359 |
| 24Hr | HIST1H2BC | yellow | -0.55663 | 0.002566 | 0.034359 |
| 24Hr | DGAT1     | yellow | -0.55614 | 0.002593 | 0.034359 |
| 24Hr | SUPV3L1   | yellow | -0.55598 | 0.002602 | 0.034359 |
| 24Hr | IDH3B     | yellow | -0.55553 | 0.002628 | 0.034359 |
| 24Hr | RPUSD1    | yellow | -0.55517 | 0.002649 | 0.034359 |
| 24Hr | RBM42     | yellow | -0.5551  | 0.002652 | 0.034359 |
| 24Hr | GLTPD1    | yellow | -0.55418 | 0.002705 | 0.034359 |
| 24Hr | TMF1      | yellow | -0.55159 | 0.00286  | 0.034359 |
| 24Hr | GPN2      | yellow | -0.55052 | 0.002925 | 0.034359 |
| 24Hr | UBE4A     | yellow | -0.54975 | 0.002973 | 0.034359 |
| 24Hr | MTO1      | yellow | -0.54954 | 0.002987 | 0.034359 |
| 24Hr | ZNF564    | yellow | -0.54782 | 0.003097 | 0.034359 |
| 24Hr | DPP9      | yellow | -0.54772 | 0.003104 | 0.034359 |
| 24Hr | TNFAIP3   | yellow | -0.5449  | 0.003292 | 0.034359 |
| 24Hr | CDAN1     | yellow | -0.54379 | 0.003369 | 0.034359 |
| 24Hr | ST3GAL1   | yellow | -0.54363 | 0.003381 | 0.034359 |
| 24Hr | LOC440434 | yellow | -0.54285 | 0.003436 | 0.034359 |
| 24Hr | STUB1     | yellow | -0.5419  | 0.003504 | 0.034359 |
| 24Hr | CXCL1     | yellow | -0.54082 | 0.003583 | 0.034359 |
| 24Hr | TSG101    | yellow | -0.54044 | 0.003612 | 0.034359 |
| 24Hr | SCARNA5   | yellow | -0.54023 | 0.003627 | 0.034359 |
| 24Hr | PAPSS2    | yellow | -0.53997 | 0.003646 | 0.034359 |
| 24Hr | MGRN1     | yellow | -0.53962 | 0.003673 | 0.034359 |
| 24Hr | SCRIB     | yellow | -0.53876 | 0.003739 | 0.034359 |
| 24Hr | FUS       | yellow | -0.53867 | 0.003745 | 0.034359 |
| 24Hr | TBC1D2B   | yellow | -0.53728 | 0.003853 | 0.034802 |
| 24Hr | COBRA1    | yellow | -0.53283 | 0.004217 | 0.036945 |
| 24Hr | LOC541471 | yellow | -0.53227 | 0.004264 | 0.036945 |
| 24Hr | TRMT61A   | yellow | -0.53135 | 0.004344 | 0.036945 |
| 24Hr | MLL       | yellow | -0.53132 | 0.004346 | 0.036945 |
| 24Hr | TAF1B     | yellow | -0.52993 | 0.004469 | 0.037436 |
| 24Hr | MED28     | yellow | -0.52891 | 0.004561 | 0.037573 |
| 24Hr | ICAM1     | yellow | -0.52831 | 0.004615 | 0.037573 |
| 24Hr | N4BP2     | yellow | -0.52461 | 0.004966 | 0.038326 |
| 24Hr | ELF2      | yellow | -0.52379 | 0.005046 | 0.038326 |
| 24Hr | ETFB      | yellow | -0.52138 | 0.005289 | 0.038326 |
| 24Hr | TBC1D10B  | yellow | -0.521   | 0.005328 | 0.038326 |
| 24Hr | MAP3K4    | yellow | -0.52072 | 0.005357 | 0.038326 |
| 24Hr | TRIP10    | yellow | -0.52059 | 0.005371 | 0.038326 |
| 24Hr | HIST1H1C  | yellow | -0.51882 | 0.005558 | 0.039177 |
| 24Hr | CCDC137   | yellow | -0.51714 | 0.00574  | 0.039691 |
| 24Hr | STAG2     | yellow | -0.51689 | 0.005768 | 0.039691 |
| 24Hr | MPHOSPH8  | yellow | -0.51597 | 0.005871 | 0.03992  |
| 24Hr | TMEM106A  | yellow | -0.5124  | 0.006283 | 0.039944 |
| 24Hr | LMAN1     | yellow | -0.51238 | 0.006286 | 0.039944 |
| 24Hr | RPS6KC1   | yellow | -0.51232 | 0.006293 | 0.039944 |
| 24Hr | WFS1      | yellow | -0.51073 | 0.006484 | 0.039944 |
| 24Hr | IRF8      | yellow | -0.51043 | 0.006521 | 0.039944 |
| 24Hr | SART1     | yellow | -0.51022 | 0.006548 | 0.039944 |
| 24Hr | PHYH      | yellow | -0.50928 | 0.006665 | 0.039944 |

|      |          |        |          |          |          |
|------|----------|--------|----------|----------|----------|
| 24Hr | ZCCHC2   | yellow | -0.50914 | 0.006681 | 0.039944 |
| 24Hr | SIRT7    | yellow | -0.5088  | 0.006725 | 0.039944 |
| 24Hr | TTC31    | yellow | -0.50799 | 0.006826 | 0.039944 |
| 24Hr | RALBP1   | yellow | -0.50706 | 0.006946 | 0.039944 |
| 24Hr | SF1      | yellow | -0.50682 | 0.006978 | 0.039944 |
| 24Hr | SETD8    | yellow | -0.50676 | 0.006985 | 0.039944 |
| 24Hr | TRAPPC11 | yellow | -0.50567 | 0.007129 | 0.039944 |
| 24Hr | HTT      | yellow | -0.50541 | 0.007163 | 0.039944 |
| 24Hr | NUP205   | yellow | -0.50528 | 0.007181 | 0.039944 |
| 24Hr | CORO2A   | yellow | -0.50523 | 0.007187 | 0.039944 |
| 24Hr | SMS      | yellow | -0.50459 | 0.007272 | 0.040031 |
| 24Hr | RARA     | yellow | -0.50305 | 0.007482 | 0.040788 |
| 24Hr | YBX1     | yellow | -0.50233 | 0.007583 | 0.040788 |
| 24Hr | C15orf39 | yellow | -0.50167 | 0.007674 | 0.040788 |
| 24Hr | C21orf59 | yellow | -0.50008 | 0.007901 | 0.040788 |
| 24Hr | C3       | yellow | -0.4999  | 0.007927 | 0.040788 |
| 24Hr | NLRC4    | yellow | -0.49937 | 0.008004 | 0.040788 |
| 24Hr | STRA13   | yellow | -0.49909 | 0.008045 | 0.040788 |
| 24Hr | UBAC1    | yellow | -0.49685 | 0.008379 | 0.041862 |
| 24Hr | ZCCHC9   | yellow | -0.49617 | 0.008483 | 0.041905 |
| 24Hr | COX14    | yellow | -0.49529 | 0.008619 | 0.042217 |
| 24Hr | ARPC1A   | yellow | -0.49399 | 0.008821 | 0.042847 |
| 24Hr | SPNS1    | yellow | -0.49283 | 0.009007 | 0.043143 |
| 24Hr | IL10RA   | yellow | -0.49233 | 0.009089 | 0.043143 |
| 24Hr | TRUB1    | yellow | -0.49212 | 0.009122 | 0.043143 |
| 24Hr | MAP2K3   | yellow | -0.491   | 0.009306 | 0.043378 |
| 24Hr | SZT2     | yellow | -0.49019 | 0.009441 | 0.043653 |
| 24Hr | FKBP8    | yellow | -0.4891  | 0.009624 | 0.04415  |
| 24Hr | HGS      | yellow | -0.48707 | 0.009975 | 0.044823 |
| 24Hr | WDTC1    | yellow | -0.48661 | 0.010056 | 0.044823 |
| 24Hr | MED24    | yellow | -0.48657 | 0.010064 | 0.044823 |
| 24Hr | NCL      | yellow | -0.48647 | 0.010081 | 0.044823 |
| 24Hr | HPS4     | yellow | -0.48509 | 0.010327 | 0.045567 |
| 24Hr | TNRC18   | yellow | -0.48375 | 0.010573 | 0.046297 |
| 24Hr | CRADD    | yellow | -0.47962 | 0.011355 | 0.048571 |
| 24Hr | EIF4B    | yellow | -0.4781  | 0.011657 | 0.04918  |
| 24Hr | MLXIP    | yellow | -0.47674 | 0.01193  | 0.049658 |
| 24Hr | XPA      | yellow | -0.47668 | 0.011942 | 0.049658 |
| 24Hr | EXOG     | yellow | 0.47925  | 0.011429 | 0.048571 |
| 24Hr | NANS     | yellow | 0.481043 | 0.011081 | 0.047796 |
| 24Hr | RPE      | yellow | 0.482013 | 0.010896 | 0.047354 |
| 24Hr | MK167IP  | yellow | 0.49176  | 0.009181 | 0.043143 |
| 24Hr | EIF4EBP1 | yellow | 0.496702 | 0.008401 | 0.041862 |
| 24Hr | ATP6V0E1 | yellow | 0.49939  | 0.008001 | 0.040788 |
| 24Hr | ATP5L    | yellow | 0.499943 | 0.007921 | 0.040788 |
| 24Hr | ACTR8    | yellow | 0.506054 | 0.007078 | 0.039944 |
| 24Hr | COX6A1   | yellow | 0.506351 | 0.007039 | 0.039944 |
| 24Hr | NDUFB8   | yellow | 0.522798 | 0.005145 | 0.038326 |
| 24Hr | CLN6     | yellow | 0.523843 | 0.005041 | 0.038326 |
| 24Hr | COA1     | yellow | 0.523888 | 0.005036 | 0.038326 |
| 24Hr | TRIAP1   | yellow | 0.524548 | 0.004971 | 0.038326 |
| 24Hr | NDUFA13  | yellow | 0.54521  | 0.003271 | 0.034359 |
| 24Hr | JOSD2    | yellow | 0.546782 | 0.003165 | 0.034359 |
| 24Hr | CHCHD5   | yellow | 0.549878 | 0.002965 | 0.034359 |
| 24Hr | C14orf2  | yellow | 0.554498 | 0.002687 | 0.034359 |
| 24Hr | YIPF5    | yellow | 0.568335 | 0.001983 | 0.034359 |
| 24Hr | C14orf1  | yellow | 0.57079  | 0.001876 | 0.034359 |
| 24Hr | RBFOX2   | yellow | 0.578737 | 0.001564 | 0.034359 |
| 24Hr | CHRAC1   | yellow | 0.595242 | 0.001056 | 0.034359 |
| 24Hr | UBE2V2   | yellow | 0.616525 | 0.000616 | 0.034359 |
