# Supplementary material for: Human alveolar macrophage response to Mycobacterium tuberculosis: immune characteristics underlying large inter-individual variability
Source: Research Square preprint supplement (doi:10.21203/rs.3.rs-2986649/v1), 2023-06-08
Supplement: Supplementary file 4 [file 3fd7dda520a097056b7d6cfb.pdf]

**Additional file 1: Table S1. Relative *M.tb* Luminescence Units (RLUs) and RLU ratios between time points.**

All 28 AMs were incubated for 2h with *M.tb* at MOI 2:1 and 10:1, and luminescence was measured at 2, 24, 48, and 72h (n=3 per sample and time point).

The relative RLU profiles were similar or comparable between MOI 2:1 and 10:1 across the time points; therefore, only MOI 2:1 values are shown.

To estimate *M.tb* generation times (equivalent to growth rates) between 24, 48, and 72h, RLU ratios between time points were calculated with unadjusted RLUs, yielding similar results with MOI 2:1 and 10:1, indicating the ratios are robust and reproducible.

| AM  | 2hr RLU avg<br>MOI=2 | 24hr RLU<br>avg MOI=2 | 48hr RLU<br>avg MOI=2 | 72hr RLU<br>avg MOI=2 | AM  | 24/2 ratio<br>MOI=10 | 24/2 ratio<br>MOI=2 | 48/24 ratio<br>MOI=10 | 48/24 ratio<br>MOI=2 | 72/48 ratio<br>MOI=10 | 72/48 ratio<br>MOI=2 |
|-----|----------------------|-----------------------|-----------------------|-----------------------|-----|----------------------|---------------------|-----------------------|----------------------|-----------------------|----------------------|
| D1  | 20                   | 190                   | 1896                  | 3600                  | D1  | 140.6                | 52.0                | 2.92                  | 2.55                 | 1.87                  | 1.87                 |
| D2  | 6                    | 358                   | 2714                  | 5148                  | D2  | 33.6                 | 28.7                | 2.98                  | 2.84                 | 1.92                  | 1.90                 |
| D3  | 15                   | 108                   | 1177                  | 2834                  | D3  | 43.4                 | 30.4                | 2.68                  | 3.05                 | 1.82                  | 1.62                 |
| D4  | 21                   | 116                   | 387                   | 750                   | D4  | 4.6                  | 3.7                 | 2.39                  | 2.35                 | 1.82                  | 1.76                 |
| D5  | 24                   | 176                   | 910                   | 1732                  | D5  | 9.3                  | 6.9                 | 2.79                  | 2.65                 | 2.01                  | 2.09                 |
| D6  | 3                    | 29                    | 1588                  | 4395                  | D6  | 7.6                  | 4.2                 | 2.15                  | 2.09                 | 1.37                  | 1.47                 |
| D7  | 17                   | 188                   | 2870                  | 7042                  | D7  | 9.9                  | 5.1                 | 2.42                  | 2.43                 | 1.98                  | 2.05                 |
| D8  | 11                   | 96                    | 2001                  | 2916                  | D8  | 6.7                  | 3.3                 | 2.12                  | 2.49                 | 1.71                  | 1.81                 |
| D9  | 27                   | 330                   | 2427                  | 4399                  | D9  | 7.5                  | 4.3                 | 2.35                  | 2.19                 | 1.87                  | 2.26                 |
| D10 | 2                    | 32                    | 1663                  | 4295                  | D10 | 7.2                  | 3.8                 | 1.96                  | 2.03                 | 1.76                  | 1.85                 |
| D11 | 1                    | 15                    | 1402                  | 3247                  | D11 | 15.3                 | 11.6                | 1.39                  | 1.60                 | 1.86                  | 2.21                 |
| D12 | 5                    | 51                    | 624                   | 1499                  | D12 | 13.9                 | 5.6                 | 1.81                  | 2.03                 | 1.85                  | 1.89                 |
| D13 | 28                   | 268                   | 842                   | 1602                  | D13 | 4.8                  | 3.6                 | 2.52                  | 2.35                 | 1.96                  | 1.83                 |
| D14 | 9                    | 333                   | 2548                  | 5070                  | D14 | 8.8                  | 3.9                 | 2.18                  | 2.15                 | 1.50                  | 1.84                 |
| D15 | 13                   | 120                   | 774                   | 1654                  | D15 | 20.5                 | 10.9                | 2.13                  | 2.41                 | 2.48                  | 2.35                 |
| D16 | 7                    | 317                   | 2878                  | 6363                  | D16 | 34.0                 | 32.7                | 2.14                  | 2.27                 | 1.60                  | 1.79                 |
| D17 | 16                   | 204                   | 6673                  | 15159                 | D17 | 17.8                 | 15.3                | 2.50                  | 2.45                 | 2.02                  | 2.12                 |
| D18 | 18                   | 145                   | 397                   | 933                   | D18 | 6.4                  | 2.7                 | 2.39                  | 2.35                 | 1.80                  | 2.43                 |
| D19 | 8                    | 287                   | 1713                  | 3880                  | D19 | 15.3                 | 12.6                | 2.20                  | 1.94                 | 1.83                  | 2.01                 |
| D20 | 25                   | 241                   | 1942                  | 3785                  | D20 | 10.2                 | 10.0                | 1.89                  | 1.90                 | 1.55                  | 1.66                 |
| D21 | 4                    | 62                    | 416                   | 885                   | D21 | 5.6                  | 3.3                 | 1.81                  | 1.94                 | 2.12                  | 2.08                 |
| D22 | 19                   | 119                   | 1498                  | 2903                  | D22 | 11.2                 | 6.5                 | 2.36                  | 2.21                 | 1.98                  | 1.88                 |
| D23 | 22                   | 174                   | 1123                  | 2485                  | D23 | 16.6                 | 7.6                 | 1.79                  | 1.57                 | 1.92                  | 1.77                 |
| D24 | 26                   | 175                   | 1411                  | 2591                  | D24 | 5.2                  | 5.2                 | 1.90                  | 1.90                 | 1.74                  | 1.74                 |
| D25 | 10                   | 389                   | 2662                  | 4917                  | D25 | 8.1                  | 8.1                 | 2.21                  | 1.95                 | 1.89                  | 1.94                 |
| D26 | 23                   | 212                   | 1609                  | 2528                  | D26 | 18.8                 | 8.1                 | 1.80                  | 1.84                 | 1.68                  | 1.59                 |
| D27 | 14                   | 465                   | 3243                  | 6318                  | D27 | 10.1                 | 7.4                 | 1.88                  | 1.81                 | 2.08                  | 2.18                 |
| D28 | 12                   | 93                    | 939                   | 1727                  | D28 | 7.3                  | 3.1                 | 1.97                  | 1.90                 | 1.84                  | 1.81                 |
