# Supplementary material for: Human alveolar macrophage response to Mycobacterium tuberculosis: immune characteristics underlying large inter-individual variability
Source: Research Square preprint supplement (doi:10.21203/rs.3.rs-2986649/v1), 2023-06-08
Supplement: Supplementary file 5 [file 4921a633eac3bfb94c95ee85.pdf]

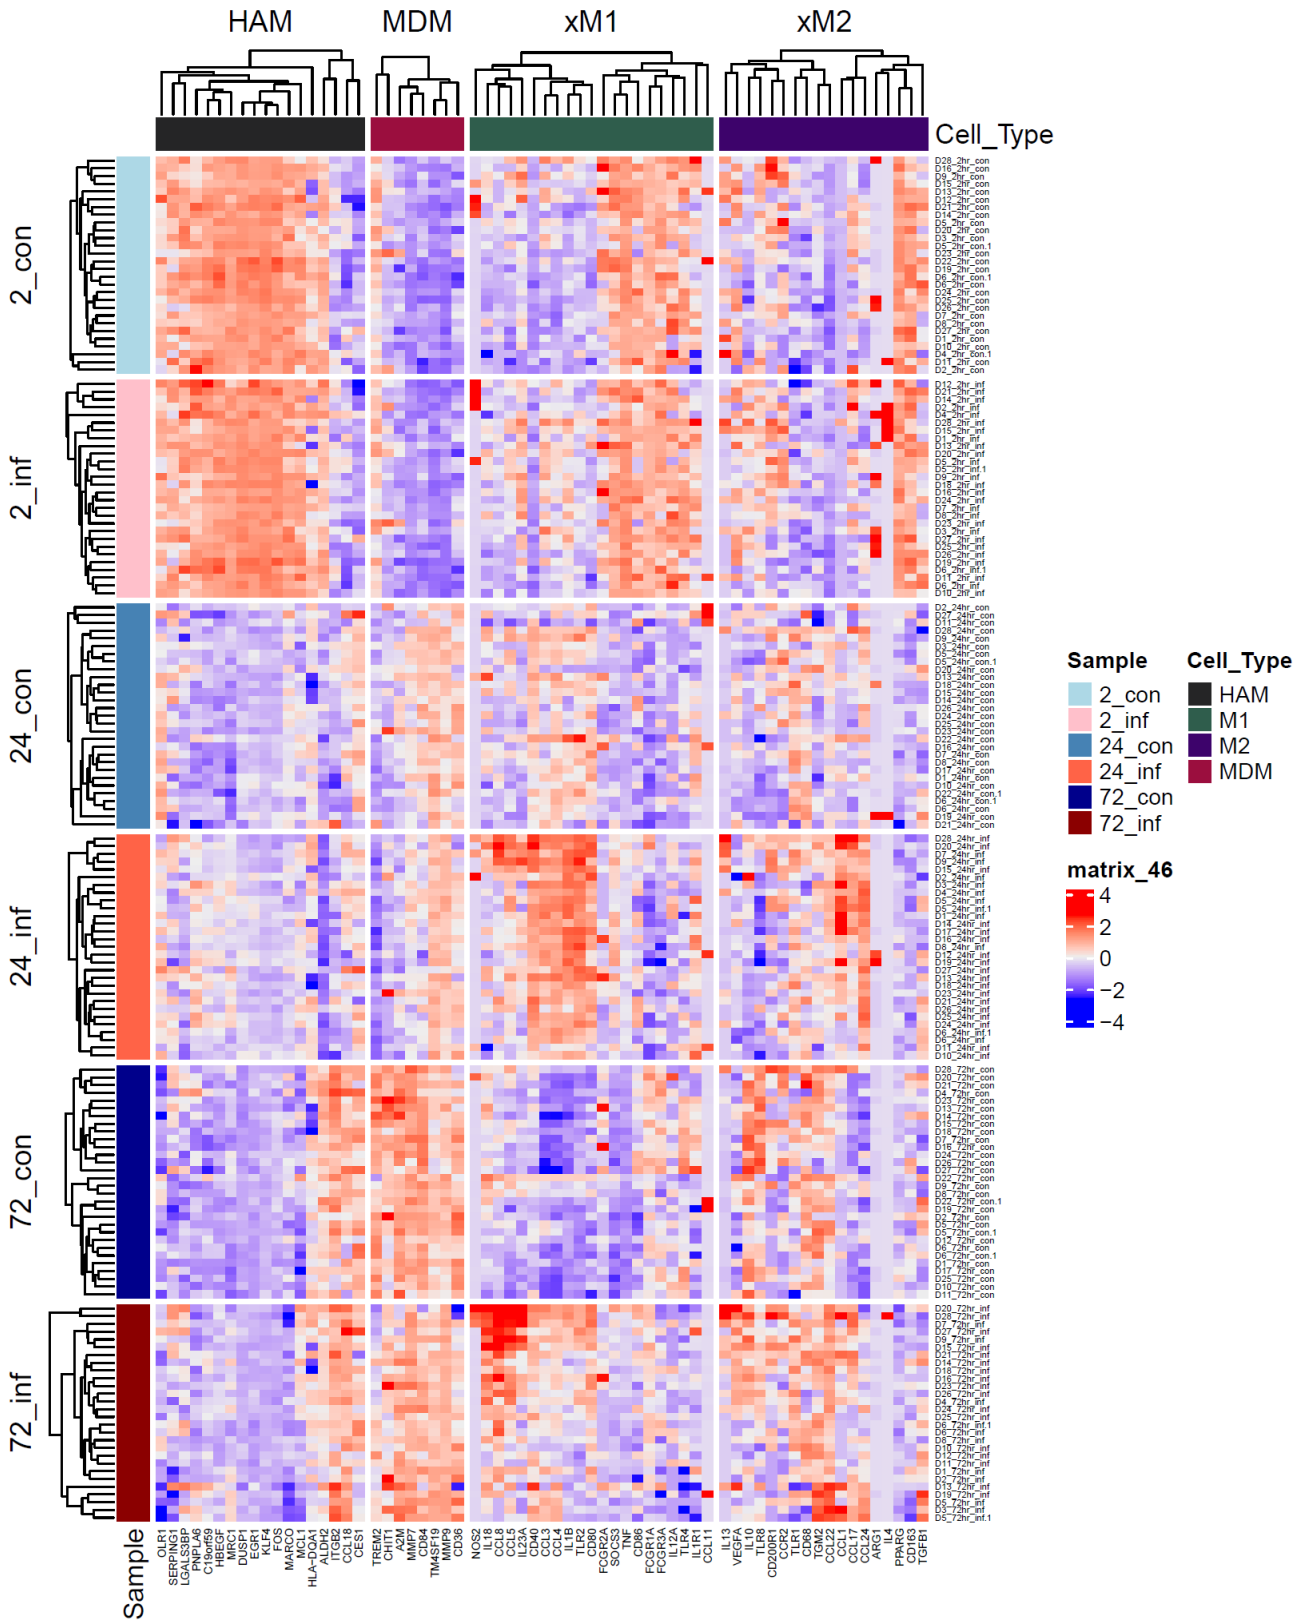

**Additional file 5: Supplementary Fig. 2.** Marker genes support the ex vivo trajectory of cells from human alveolar macrophages (HAM) to monocyte-derived macrophages (MDM). Each row shows the gene expression profile from a single sample at a time point. Each column shows the gene expression profile for a single gene. Genes previously described to be markers of either HAMs or MDMs (36), or associated with polarization along the M1/M2 axis are clustered independently. At 2 hours ex vivo control (2\_con) and infected (2\_inf) cells show high expression of HAM marker genes, after 72 hours of ex vivo culture, both control (72\_con) and infected (72\_con) cells shift to show high expression of MDM marker genes. Across the same time span infected and control cells show differential expression of M1 and M2 associated genes.
