# Supplementary material for: Human alveolar macrophage response to Mycobacterium tuberculosis: immune characteristics underlying large inter-individual variability
Source: Research Square preprint supplement (doi:10.21203/rs.3.rs-2986649/v1), 2023-06-08
Supplement: Supplementary file 6 [file 55ce92afe873092ef59786dc.pdf]

**Additional file 13: Table S10A. Differential expression analysis of South Africa cohort (2h)**

Max group means: For each group in the statistical comparison, the average reads per kilobase of transcript per million reads mapped (RPKM) is calculated. This value is the maximum of the average RPKM's. Log2 fold change: log2 ratio of gene expression of infected/control. P-value: unadjusted p-value. FDR p-value: the false discovery rate corrected p-value.

| Name      | Chromosome | Region                         | Identifier      | Max group means | Log2 fold change | p-value     | FDR p-value |
|-----------|------------|--------------------------------|-----------------|-----------------|------------------|-------------|-------------|
| BSC12     | 11         | complement(62689289..62709845) | ENSG00000168000 | 3.0236354       | 1.409865         | 2.33361E-13 | 3.49855E-09 |
| AKAP12    | 6          | 151239967..151358559           | ENSG00000131016 | 28.93872        | 0.609386         | 9.97186E-12 | 7.47491E-08 |
| gene:ENSG | 12         | complement(56285916..56316059) | ENSG00000144785 | 3.9505878       | 1.306187         | 5.24856E-10 | 2.62288E-06 |
| MT2A      | 16         | 56608584..56609497             | ENSG00000125148 | 1766.0052       | 0.493035         | 1.2972E-08  | 4.86191E-05 |
| MT1M      | 16         | 56632659..56633981             | ENSG00000205364 | 171.46759       | 0.846304         | 2.7656E-08  | 8.29237E-05 |
| gene:ENSG | 1          | complement(160997957..1610389) | ENSG00000270149 | 5.9072701       | -0.76175         | 1.26872E-07 | 0.000237759 |
| MT1A      | 16         | 56638666..56640087             | ENSG00000205362 | 86.17611        | 0.875079         | 1.11854E-07 | 0.000237759 |
| MT-ATP8   | MT         | 8366..8572                     | ENSG00000228253 | 1169.7826       | 0.465683         | 1.0496E-07  | 0.000237759 |
| MT1H      | 16         | 56669814..56671129             | ENSG00000205358 | 72.003411       | 0.740344         | 1.59183E-07 | 0.000265164 |
| MT1G      | 16         | complement(56666730..56668065) | ENSG00000125144 | 1013.97         | 0.690287         | 1.85906E-07 | 0.00027871  |
| PDCD6-AH  | 5          | 271670..438291                 | ENSG00000288622 | 0.203082        | -4.6936          | 2.17799E-07 | 0.00029684  |
| gene:ENSG | 7          | 66628958..66811189             | ENSG00000284461 | 0.9824603       | 0.788657         | 6.18164E-07 | 0.000772292 |
| gene:ENSG | 12         | complement(6556886..6607367)   | ENSG00000285238 | 3.0257621       | -1.24602         | 6.79587E-07 | 0.000783721 |
| PPAN-P2R) | 19         | 10106223..10114780             | ENSG00000243207 | 0.5296556       | -2.39044         | 8.37152E-07 | 0.00089647  |
| gene:ENSG | 11         | 31812391..32104665             | ENSG00000285283 | 6.2513767       | -0.82052         | 9.64184E-07 | 0.000903441 |
| MT1X      | 16         | 56682470..56684196             | ENSG00000187193 | 367.39634       | 0.706729         | 9.19039E-07 | 0.000903441 |
| MT1E      | 16         | 56625475..56627112             | ENSG00000169715 | 227.33367       | 0.714194         | 1.02992E-06 | 0.000908267 |
| MT1B      | 16         | 56651886..56653204             | ENSG00000169688 | 6.6287131       | 1.281833         | 1.14722E-06 | 0.000955503 |
| gene:ENSG | 14         | complement(31334312..31457441) | ENSG00000203546 | 0.2731843       | 1.931727         | 1.23375E-06 | 0.000973491 |
| ATF3      | 1          | 212565334..212620777           | ENSG00000162772 | 92.506719       | 0.424943         | 1.47171E-06 | 0.00106367  |
| CDK3      | 17         | 76000906..76005999             | ENSG00000250506 | 1.6133425       | -0.95084         | 1.48993E-06 | 0.00106367  |
| HYPK      | 15         | 43796142..43804427             | ENSG00000242028 | 5.6481665       | 0.31444          | 2.62799E-06 | 0.001790852 |
| IL13RN    | 2          | 113058638..113065382           | ENSG00000136695 | 8.2797449       | 0.45478          | 4.33687E-06 | 0.002826888 |
| HBEGF     | 5          | complement(140332843..1403466) | ENSG00000113070 | 154.70374       | 0.391975         | 7.00807E-06 | 0.0042026   |
| SCGB1A1   | 11         | 62405103..62423195             | ENSG00000149021 | 18.010758       | 0.996231         | 6.73847E-06 | 0.0042026   |
| OVOL1     | 11         | 65787063..65797214             | ENSG00000172818 | 9.6890093       | 0.418221         | 1.32878E-05 | 0.007661934 |
| ERRF1     | 1          | complement(8004404..8026309)   | ENSG00000116285 | 38.54294        | 0.387107         | 1.62089E-05 | 0.00900013  |
| CCL3L1    | 17         | complement(36194869..36196758) | ENSG00000276085 | 416.9838        | 0.669603         | 1.87667E-05 | 0.010048207 |
| MT-ND6    | MT         | complement(14149..14673)       | ENSG00000198695 | 2104.7213       | 0.356742         | 3.85742E-05 | 0.019941538 |
| gene:ENSG | 9          | complement(32455323..32552603) | ENSG00000288684 | 0.5295208       | 2.758007         | 4.84944E-05 | 0.024234266 |
| ARC       | 8          | complement(142611049..1426144) | ENSG00000198576 | 2.4933617       | 0.607713         | 5.19594E-05 | 0.02491927  |
| CCL2      | 17         | 34255218..34257203             | ENSG00000108691 | 31.411017       | 0.399838         | 5.31895E-05 | 0.02491927  |
| IL1B      | 2          | complement(112829751..1128368) | ENSG00000125538 | 1733.0887       | 0.492269         | 6.69445E-05 | 0.029518598 |
| TM4SF19-f | 3          | complement(196316082..1963383) | ENSG00000273331 | 4.7087128       | 0.738273         | 6.60384E-05 | 0.029518598 |
| ZBTB2     | 6          | complement(151364115..1513915) | ENSG00000181472 | 12.885117       | 0.369966         | 7.41016E-05 | 0.031740884 |
| GOS2      | 1          | 209675412..209676390           | ENSG00000123689 | 296.25493       | 0.362132         | 8.78441E-05 | 0.036033448 |
| gene:ENSG | 11         | complement(62559603..62591531) | ENSG00000255508 | 3.6613566       | -0.43311         | 9.19594E-05 | 0.036033448 |
| MT1F      | 16         | 56657731..56660698             | ENSG00000198417 | 164.26356       | 0.488914         | 9.15802E-05 | 0.036033448 |
| C17orf107 | 17         | 4899418..4902934               | ENSG00000205710 | 2.8851871       | 0.486338         | 9.3737E-05  | 0.036033448 |
| NDUFA13   | 19         | 19515736..19529054             | ENSG00000186010 | 69.690161       | 0.234599         | 9.70891E-05 | 0.03638898  |
| SERPINB2  | 18         | 63871692..63903888             | ENSG00000197632 | 164.91586       | 0.559754         | 0.000114397 | 0.041830369 |
| RSRP1     | 1          | complement(25242249..25338213) | ENSG00000117616 | 9.4503162       | -0.35648         | 0.000143332 | 0.047971839 |
| CXCL8     | 4          | 73740541..73743716             | ENSG00000169429 | 3825.5435       | 0.329735         | 0.000139458 | 0.047971839 |
| UPK3BL1   | 7          | complement(102637025..1026427) | ENSG00000267368 | 2.5622095       | -1.78825         | 0.000134854 | 0.047971839 |
| MT-ND1    | MT         | 3307..4262                     | ENSG00000198888 | 2632.251        | 0.328995         | 0.000143992 | 0.047971839 |

**Additional file 13: Table S10B. Differential expression analysis of South Africa cohort (24h)**

| Name     | Chromosome | Region                       | Identifier      | Max group means | Log2 fold change | p-value     | FDR p-value |
|----------|------------|------------------------------|-----------------|-----------------|------------------|-------------|-------------|
| CXCL10   | 4          | complement(76021118..7602349 | ENSG00000169245 | 62.80219        | 5.639189         | 3.29538E-36 | 4.81521E-32 |
| ISG20    | 15         | 88635670..88656483           | ENSG00000172183 | 8.883613        | 2.709466         | 1.80396E-32 | 1.31797E-28 |
| GBP4     | 1          | complement(89181144..8919894 | ENSG00000162654 | 13.56487        | 2.169912         | 3.93303E-31 | 1.91565E-27 |
| IFI35    | 17         | 43006740..43014456           | ENSG00000068079 | 93.39062        | 1.310776         | 1.53147E-27 | 5.59448E-24 |
| BATF2    | 11         | complement(64987945..6499701 | ENSG00000168062 | 6.600998        | 1.95962          | 1.06523E-26 | 3.11304E-23 |
| EPST1    | 13         | complement(42886388..4299227 | ENSG00000133106 | 17.95844        | 2.05966          | 7.4863E-26  | 1.82316E-22 |
| IDO1     | 8          | 39902275..39928790           | ENSG00000131203 | 10.39992        | 2.019104         | 3.29293E-25 | 6.87376E-22 |
| CXCL11   | 4          | complement(76033682..7604141 | ENSG00000169248 | 4.64055         | 4.749733         | 6.48941E-25 | 1.18529E-21 |
| PSMB9    | 6          | 32844136..32859851           | ENSG00000240065 | 96.83706        | 1.3142           | 1.57247E-24 | 2.553E-21   |
| C15      | 12         | 6988259..7071032             | ENSG00000182326 | 3.08998         | 1.933262         | 4.54502E-24 | 6.64119E-21 |
| STAT1    | 2          | complement(190908460..191020 | ENSG00000115415 | 57.18212        | 1.435581         | 2.84572E-22 | 3.78015E-19 |
| IFIT3    | 10         | 89327307..89377473           | ENSG00000119917 | 61.96066        | 1.917808         | 4.17532E-22 | 5.08415E-19 |
| XAF1     | 17         | 6755447..6775647             | ENSG00000132530 | 19.46154        | 1.956629         | 9.88361E-22 | 1.11092E-18 |
| IRF7     | 11         | complement(612553..615983)   | ENSG00000185507 | 29.19599        | 1.471127         | 5.45526E-21 | 5.31415E-18 |
| CCL8     | 17         | 34319435..34321402           | ENSG00000108700 | 9.032363        | 3.613346         | 5.16389E-21 | 5.31415E-18 |
| HELZ2    | 20         | complement(63558086..6357423 | ENSG00000130589 | 9.516842        | 2.009613         | 1.33276E-20 | 1.21715E-17 |
| TAP1     | 6          | complement(32845209..3285381 | ENSG00000168394 | 107.2633        | 1.288834         | 2.03739E-20 | 1.7512E-17  |
| ETV7     | 6          | complement(36354091..3638780 | ENSG00000010030 | 1.725751        | 2.405316         | 2.16005E-20 | 1.75348E-17 |
| ISG15    | 1          | 1001138..1014540             | ENSG00000187608 | 162.3822        | 1.93527          | 7.62771E-20 | 5.86611E-17 |
| IL15RA   | 10         | complement(5943639..5978187) | ENSG00000134470 | 5.824782        | 1.277155         | 9.9536E-20  | 7.2721E-17  |
| APOL3    | 22         | complement(36140330..3616617 | ENSG00000128284 | 5.749211        | 1.436725         | 1.69421E-19 | 1.17885E-16 |
| FBXO6    | 1          | 11664200..11674354           | ENSG00000116663 | 27.16848        | 1.111714         | 4.88611E-19 | 3.24527E-16 |
| DDX60    | 4          | complement(168216291..168318 | ENSG00000137628 | 4.028236        | 1.337931         | 4.81216E-18 | 3.05718E-15 |
| NLRC5    | 16         | 56989485..57083531           | ENSG00000140853 | 4.623732        | 1.229135         | 1.67957E-17 | 1.02258E-14 |
| DHX58    | 17         | complement(42101404..4211271 | ENSG00000108771 | 7.59651         | 1.170161         | 2.08585E-17 | 1.21913E-14 |
| NEXN     | 1          | 77888513..77943895           | ENSG00000162614 | 4.221094        | 2.391494         | 8.43919E-17 | 4.74283E-14 |
| LAP3     | 4          | 17577198..17607972           | ENSG00000002549 | 162.2877        | 1.134688         | 1.01139E-16 | 5.47349E-14 |
| TNFSF10  | 3          | complement(172505508..172523 | ENSG00000121858 | 4.702353        | 2.87186          | 7.07722E-16 | 3.6933E-13  |
| AIM2     | 1          | complement(159062484..159147 | ENSG00000163568 | 6.502568        | 1.62214          | 7.80698E-16 | 3.93364E-13 |
| CXCR4    | 2          | complement(136114349..136118 | ENSG00000121966 | 17.09953        | -0.817534        | 1.1453E-15  | 5.39843E-13 |
| IFIT2    | 10         | 89283694..89309271           | ENSG00000119922 | 53.51509        | 2.016237         | 1.11397E-15 | 5.39843E-13 |
| TRIM22   | 11         | 5689697..5737089             | ENSG00000132274 | 30.08608        | 1.006517         | 2.0528E-15  | 9.37358E-13 |
| CD40     | 20         | 46118278..46129863           | ENSG00000101017 | 68.95752        | 0.974583         | 3.54009E-15 | 1.56751E-12 |
| GBP1     | 1          | complement(89051882..8906536 | ENSG00000117228 | 101.1965        | 1.582148         | 5.38982E-15 | 2.31635E-12 |
| IL3RA    | X          | 1336616..1382689             | ENSG00000185291 | 18.23311        | 0.684418         | 5.76943E-15 | 2.40865E-12 |
| PARP9    | 3          | complement(122527924..122564 | ENSG00000138496 | 22.25833        | 1.125007         | 7.18036E-15 | 2.91443E-12 |
| SAMD9L   | 7          | complement(93130056..9314838 | ENSG00000177409 | 27.55765        | 1.227874         | 1.4943E-14  | 5.90128E-12 |
| APOL1    | 22         | 36253071..36267530           | ENSG00000100342 | 29.65888        | 0.974585         | 1.57666E-14 | 6.06267E-12 |
| STAT2    | 12         | complement(56341597..5636016 | ENSG00000170581 | 36.42297        | 0.933715         | 2.69368E-14 | 1.00923E-11 |
| GIMAP8   | 7          | 150450630..150479393         | ENSG00000171115 | 1.817144        | 1.5525           | 6.22936E-14 | 2.27558E-11 |
| IL27     | 16         | complement(28499362..2851205 | ENSG00000197272 | 4.329771        | 1.933054         | 6.40814E-14 | 2.2838E-11  |
| SP110    | 2          | complement(230165186..230225 | ENSG00000135899 | 9.953133        | 1.019112         | 6.89046E-14 | 2.39722E-11 |
| RTP4     | 3          | 187368385..187372076         | ENSG00000136514 | 6.374605        | 1.127444         | 7.37973E-14 | 2.50773E-11 |
| SCIMP    | 17         | complement(5208920..5234860) | ENSG00000161929 | 17.50675        | 0.976436         | 1.51564E-13 | 5.0333E-11  |
| ADAMTS15 | 11         | 130448645..130476645         | ENSG00000166106 | 1.37905         | -1.3139          | 1.74338E-13 | 5.66093E-11 |
| ANKRD22  | 10         | complement(88819896..8885184 | ENSG00000152766 | 1.53304         | 2.445187         | 1.81947E-13 | 5.77959E-11 |
| VAMP5    | 2          | 85584431..85593406           | ENSG00000168899 | 22.60279        | 1.623946         | 2.02875E-13 | 6.17584E-11 |
| OAS2     | 12         | 112978395..113011723         | ENSG00000111335 | 30.763          | 1.542735         | 2.00973E-13 | 6.17584E-11 |
| CCL2     | 17         | 34255218..34257203           | ENSG00000108691 | 105.6951        | 1.060229         | 2.19159E-13 | 6.53542E-11 |
| TNFSF13B | 13         | 108251240..108308484         | ENSG00000102524 | 17.31771        | 1.150748         | 2.39894E-13 | 7.01068E-11 |
| WARS1    | 14         | complement(100333790..100376 | ENSG00000140105 | 175.7687        | 1.014859         | 3.95575E-13 | 1.13336E-10 |
| IFIH1    | 2          | complement(162267074..162318 | ENSG00000115267 | 31.24539        | 1.169699         | 4.1003E-13  | 1.15218E-10 |
| HERC6    | 4          | 88378739..88443097           | ENSG00000138642 | 6.002294        | 1.263057         | 4.55894E-13 | 1.2456E-10  |

|           |    |                               |                 |          |           |             |             |
|-----------|----|-------------------------------|-----------------|----------|-----------|-------------|-------------|
| PSME2     | 14 | complement(24143362..2414757) | ENSG00000100911 | 118.5654 | 0.858642  | 4.60324E-13 | 1.2456E-10  |
| IFI44     | 1  | 78649796..78664078            | ENSG00000137965 | 39.65962 | 1.727822  | 5.25806E-13 | 1.39263E-10 |
| IFITM3    | 11 | complement(319676..329475)    | ENSG00000142089 | 35.1449  | 1.589219  | 5.3372E-13  | 1.39263E-10 |
| MX1       | 21 | 41420020..41470071            | ENSG00000157601 | 63.58998 | 2.245262  | 5.4657E-13  | 1.40114E-10 |
| APOL6     | 22 | 35648446..35668404            | ENSG00000221963 | 15.62656 | 0.84619   | 5.83469E-13 | 1.46994E-10 |
| CMPK2     | 2  | complement(6840570..6866635)  | ENSG00000134326 | 16.26845 | 2.018562  | 8.55502E-13 | 2.11875E-10 |
| ADCY1     | 7  | 45574140..45723116            | ENSG00000164742 | 0.833372 | -1.30496  | 1.09401E-12 | 2.66428E-10 |
| PLEKHO1   | 1  | 150149183..150164720          | ENSG00000023902 | 36.19575 | 0.668736  | 1.26509E-12 | 3.0304E-10  |
| HAPLN3    | 15 | complement(88877294..8889559) | ENSG00000140511 | 1.413739 | 3.348866  | 1.40542E-12 | 3.31227E-10 |
| ADAP1     | 7  | complement(897900..955407)    | ENSG00000105963 | 20.07915 | 0.580063  | 2.16604E-12 | 5.02383E-10 |
| ACOD1     | 13 | 76948511..76958638            | ENSG00000102794 | 2.353769 | 2.469906  | 4.00375E-12 | 9.14106E-10 |
| OCSTAMP   | 20 | complement(46540946..4655065) | ENSG00000149635 | 6.671304 | 0.917208  | 4.33253E-12 | 9.73953E-10 |
| CFB       | 6  | 31945650..31952084            | ENSG00000243649 | 7.596869 | 0.981107  | 4.91097E-12 | 1.08726E-09 |
| JAML      | 11 | complement(118193725..118225) | ENSG00000160593 | 28.00029 | -1.015487 | 6.44823E-12 | 1.40629E-09 |
| NMI       | 2  | complement(151270470..151289) | ENSG00000123609 | 34.07928 | 0.566204  | 6.73319E-12 | 1.42588E-09 |
| IL15      | 4  | 141636583..141733987          | ENSG00000164136 | 1.152822 | 1.053341  | 6.66119E-12 | 1.42588E-09 |
| SEMA4D    | 9  | complement(89360787..8949813) | ENSG00000187764 | 3.708495 | 0.926495  | 7.99677E-12 | 1.66927E-09 |
| NUB1      | 7  | 151341772..151378449          | ENSG00000013374 | 16.07721 | 0.554147  | 8.85709E-12 | 1.82281E-09 |
| C1RL      | 12 | complement(7089587..7109238)  | ENSG00000139178 | 5.657986 | 0.769359  | 1.06665E-11 | 2.16471E-09 |
| SIGLEC1   | 20 | complement(3686970..3712600)  | ENSG00000088827 | 24.88286 | 1.758126  | 1.91646E-11 | 3.83607E-09 |
| gene:ENSG | 12 | 57772660..57797554            | ENSG00000257921 | 0.564247 | -3.85741  | 1.96034E-11 | 3.87088E-09 |
| APOBEC3A  | 22 | 38952741..38992778            | ENSG00000128383 | 2.403681 | 3.360353  | 2.33005E-11 | 4.53956E-09 |
| DYNLT1    | 6  | complement(158636474..158644) | ENSG00000146425 | 143.9426 | 0.628322  | 2.37898E-11 | 4.5739E-09  |
| SECTM1    | 17 | complement(82321024..8233407) | ENSG00000141574 | 10.20428 | 1.344277  | 3.60627E-11 | 6.84347E-09 |
| CCNG2     | 4  | 77157207..77433388            | ENSG00000138764 | 3.317427 | -0.614155 | 3.69669E-11 | 6.92514E-09 |
| PARP14    | 3  | 122680839..122730840          | ENSG00000173193 | 25.14059 | 0.935561  | 3.83441E-11 | 7.0922E-09  |
| DDX58     | 9  | complement(32455302..3252620) | ENSG00000107201 | 12.58762 | 1.49556   | 5.94081E-11 | 1.07169E-08 |
| MEGF9     | 9  | complement(120600811..120714) | ENSG00000106780 | 9.632551 | -0.537058 | 5.92831E-11 | 1.07169E-08 |
| GPA33     | 1  | complement(167052836..167166) | ENSG00000143167 | 7.86592  | -0.65055  | 7.73373E-11 | 1.37811E-08 |
| GSDMD     | 8  | 143553207..143563062          | ENSG00000104518 | 24.23532 | 0.526161  | 9.71695E-11 | 1.71065E-08 |
| IFIT1     | 10 | 89392546..89406487            | ENSG00000185745 | 27.13228 | 2.592121  | 9.99951E-11 | 1.73944E-08 |
| MOV10     | 1  | 112673141..112700746          | ENSG00000155363 | 8.237789 | 0.652207  | 1.10597E-10 | 1.90122E-08 |
| PDCD6-AH  | 5  | 271670..438291                | ENSG00000288622 | 0.264964 | -4.846208 | 1.65702E-10 | 2.8154E-08  |
| OAS3      | 12 | 112938051..112976460          | ENSG00000111331 | 26.5667  | 1.502815  | 1.89257E-10 | 3.17864E-08 |
| ADAMTS1   | 21 | complement(26835755..2684540) | ENSG00000154734 | 0.933658 | -1.408844 | 2.77409E-10 | 4.60626E-08 |
| ARNTL2    | 12 | 27332854..27425289            | ENSG00000029153 | 2.587399 | 0.842987  | 2.88676E-10 | 4.73947E-08 |
| PLSCR1    | 3  | complement(146515180..146544) | ENSG00000188313 | 66.02875 | 0.99609   | 3.04887E-10 | 4.95001E-08 |
| USP18     | 22 | 18150170..18177397            | ENSG00000184979 | 23.90617 | 1.947487  | 3.39451E-10 | 5.45061E-08 |
| GBP2      | 1  | complement(89106132..8915045) | ENSG00000162645 | 29.06386 | 1.003244  | 4.31929E-10 | 6.78639E-08 |
| MERTK     | 2  | 111898607..112029561          | ENSG00000153208 | 1.997928 | -1.165517 | 4.30163E-10 | 6.78639E-08 |
| IRF9      | 14 | 24161265..24166565            | ENSG00000213928 | 35.8381  | 0.604937  | 4.77789E-10 | 7.42707E-08 |
| APOL2     | 22 | complement(36226209..3623995) | ENSG00000128335 | 40.01591 | 0.588881  | 5.34293E-10 | 8.21799E-08 |
| GIMAP4    | 7  | 150567369..150573953          | ENSG00000133574 | 13.61163 | 0.54644   | 5.6212E-10  | 8.55594E-08 |
| SHFL      | 19 | 10086122..10093252            | ENSG00000130813 | 15.47354 | 0.639247  | 9.00498E-10 | 1.3565E-07  |
| AXL       | 19 | 41219223..41261766            | ENSG00000167601 | 16.80568 | 0.581694  | 9.60713E-10 | 1.43244E-07 |
| CIITA     | 16 | 10866222..10943021            | ENSG00000179583 | 4.571039 | 1.142108  | 1.01625E-09 | 1.49994E-07 |
| GBP7      | 1  | complement(89131742..8917600) | ENSG00000213512 | 0.77157  | 2.004322  | 1.10425E-09 | 1.60876E-07 |
| IQSEC3    | 12 | 66767..178455                 | ENSG00000120645 | 1.536856 | -0.922706 | 1.12301E-09 | 1.60876E-07 |
| PML       | 15 | 73994673..74047827            | ENSG00000140464 | 7.833458 | 0.719609  | 1.12062E-09 | 1.60876E-07 |
| SLAMF8    | 1  | 159826811..159837492          | ENSG00000158714 | 102.0196 | 0.932413  | 1.20829E-09 | 1.71413E-07 |
| RSPO3     | 6  | 127118671..127199481          | ENSG00000146374 | 0.980263 | 1.755358  | 1.35279E-09 | 1.90067E-07 |
| RAPGEF3   | 12 | complement(47734363..4777104) | ENSG00000079337 | 1.573389 | -0.811045 | 1.43661E-09 | 1.99922E-07 |
| RNF213    | 17 | 80260866..80398786            | ENSG00000173821 | 19.98588 | 0.827949  | 1.53087E-09 | 2.11029E-07 |
| COLEC12   | 18 | complement(316737..500722)    | ENSG00000158270 | 12.62186 | -0.718562 | 1.6292E-09  | 2.20425E-07 |
| CSF2RB    | 22 | 36913628..36940439            | ENSG00000100368 | 26.16428 | 0.674718  | 1.62675E-09 | 2.20425E-07 |
| RCN1      | 11 | 32091074..32105722            | ENSG00000049449 | 22.88085 | 0.492853  | 1.67285E-09 | 2.24253E-07 |
| EIF2AK2   | 2  | complement(37099210..3715752) | ENSG00000055332 | 7.399838 | 0.861916  | 1.99266E-09 | 2.64697E-07 |
| TPD52L1   | 6  | 125119049..125264407          | ENSG00000111907 | 2.006309 | -0.917182 | 2.21382E-09 | 2.91426E-07 |

|           |   |    |                              |                 |          |           |             |             |
|-----------|---|----|------------------------------|-----------------|----------|-----------|-------------|-------------|
| SP140     |   | 2  | 230203110..230313215         | ENSG00000079263 | 6.816703 | 0.683437  | 2.33566E-09 | 3.0472E-07  |
| PSMB8     |   | 6  | complement(32840717..3284467 | ENSG00000204264 | 93.70427 | 0.644881  | 3.18211E-09 | 4.11478E-07 |
| MMP12     |   | 11 | complement(102862736..102874 | ENSG00000262406 | 42.25821 | 0.535296  | 3.39651E-09 | 4.33547E-07 |
| GCH1      |   | 14 | complement(54842008..5490282 | ENSG00000131979 | 15.61963 | 1.589477  | 3.41212E-09 | 4.33547E-07 |
| FPR2      |   | 19 | 51752026..51770531           | ENSG00000171049 | 3.825879 | 1.004933  | 3.95857E-09 | 4.98644E-07 |
| PARP10    |   | 8  | complement(143977153..144012 | ENSG00000178685 | 35.71873 | 0.740256  | 4.0638E-09  | 5.07524E-07 |
| SLAMF7    |   | 1  | 160739057..160754821         | ENSG00000026751 | 49.66667 | 1.188415  | 4.16545E-09 | 5.11475E-07 |
| JADE2     |   | 5  | 134524312..134583230         | ENSG00000043143 | 2.402367 | 0.641975  | 4.14915E-09 | 5.11475E-07 |
| SPHK1     |   | 17 | 76376584..76387860           | ENSG00000176170 | 19.47371 | 0.480163  | 4.39507E-09 | 5.35174E-07 |
| SMAD6     |   | 15 | 66702236..66782849           | ENSG00000137834 | 6.428983 | -0.508498 | 5.48042E-09 | 6.61818E-07 |
| DDO       |   | 6  | complement(110391771..110415 | ENSG00000203797 | 13.05483 | 0.507842  | 5.86286E-09 | 6.9867E-07  |
| PIK3IP1   |   | 22 | complement(31281594..3129253 | ENSG00000100100 | 4.319591 | -0.922339 | 5.88122E-09 | 6.9867E-07  |
| SLC46A1   |   | 17 | complement(28394642..2840719 | ENSG00000076351 | 2.900559 | -0.747221 | 6.61926E-09 | 7.80006E-07 |
| IFI6      |   | 1  | complement(27666064..2767221 | ENSG00000126709 | 424.8429 | 0.975285  | 7.23318E-09 | 8.45529E-07 |
| TYMP      |   | 22 | complement(50525752..5053003 | ENSG00000025708 | 354.0185 | 0.710538  | 7.7495E-09  | 8.98695E-07 |
| UBE2L6    |   | 11 | complement(57551656..5756828 | ENSG00000156587 | 129.4188 | 0.753757  | 9.41723E-09 | 1.0835E-06  |
| GBP5      |   | 1  | complement(89258950..8927280 | ENSG00000154451 | 9.347391 | 2.195589  | 1.04208E-08 | 1.1896E-06  |
| TRIM69    |   | 15 | 44728988..44767829           | ENSG00000185880 | 3.703507 | 0.825239  | 1.10941E-08 | 1.25664E-06 |
| CCL7      |   | 17 | 34270221..34272242           | ENSG00000108688 | 16.65857 | 0.923609  | 1.12764E-08 | 1.26746E-06 |
| NCOA7     |   | 6  | 125781161..125932034         | ENSG00000111912 | 6.275193 | 0.654197  | 1.21228E-08 | 1.3522E-06  |
| PLEKHA4   |   | 19 | complement(48837097..4886861 | ENSG00000105559 | 1.864217 | 1.285935  | 1.25747E-08 | 1.39198E-06 |
| RFX5      |   | 1  | complement(151340640..151347 | ENSG00000143390 | 11.35687 | 0.659855  | 1.3369E-08  | 1.46878E-06 |
| GPR34     | X |    | 41688973..41697275           | ENSG00000171659 | 22.09785 | -0.615536 | 1.79877E-08 | 1.96146E-06 |
| HERC5     |   | 4  | 88457119..88506163           | ENSG00000138646 | 20.28466 | 1.417981  | 1.92806E-08 | 2.08687E-06 |
| CXCL9     |   | 4  | complement(76001275..7600750 | ENSG00000138755 | 1.942541 | 2.467701  | 1.96572E-08 | 2.11199E-06 |
| gene:ENSG |   | 20 | complement(35632340..3567454 | ENSG00000272897 | 1.371621 | 4.409821  | 2.07481E-08 | 2.21293E-06 |
| HMGB2     |   | 4  | complement(173331376..173334 | ENSG00000164104 | 16.55825 | -0.488863 | 2.12606E-08 | 2.25116E-06 |
| NT5C3A    |   | 7  | complement(33014130..3306279 | ENSG00000122643 | 21.9721  | 1.007838  | 2.72457E-08 | 2.86413E-06 |
| CHST3     |   | 10 | 71964395..72013558           | ENSG00000122863 | 2.100852 | 0.724816  | 2.77234E-08 | 2.89353E-06 |
| ZC3HAV1   |   | 7  | complement(139043515..139132 | ENSG00000105939 | 6.12402  | 0.460241  | 2.80918E-08 | 2.91119E-06 |
| PDK4      |   | 7  | complement(95583499..9559651 | ENSG00000004799 | 10.32281 | -0.550994 | 2.94183E-08 | 3.02719E-06 |
| GPR68     |   | 14 | complement(91232532..9125392 | ENSG00000119714 | 6.087864 | 0.679679  | 3.07308E-08 | 3.11832E-06 |
| TANC2     |   | 17 | 63009556..63427699           | ENSG00000170921 | 6.082463 | -0.537575 | 3.0587E-08  | 3.11832E-06 |
| SLC27A1   |   | 19 | 17468769..17506168           | ENSG00000130304 | 3.744934 | -0.499074 | 3.13128E-08 | 3.15547E-06 |
| TRIM5     |   | 11 | complement(5663195..5938619) | ENSG00000132256 | 5.746831 | 0.711032  | 3.26022E-08 | 3.2629E-06  |
| SLC48A1   |   | 12 | 47753916..47782751           | ENSG00000211584 | 7.528418 | -0.478778 | 3.58325E-08 | 3.5618E-06  |
| IFI44L    |   | 1  | 78619902..78646145           | ENSG00000137959 | 9.952573 | 2.380568  | 3.99024E-08 | 3.93956E-06 |
| CHI3L1    |   | 1  | complement(203178931..203186 | ENSG00000133048 | 19.51801 | 0.615945  | 4.16664E-08 | 4.07048E-06 |
| gene:ENSG |   | 11 | 93741664..93812378           | ENSG00000284057 | 1.975849 | 1.17605   | 4.17857E-08 | 4.07048E-06 |
| RAB24     |   | 5  | complement(177301198..177303 | ENSG00000169228 | 18.62013 | 0.471616  | 4.22177E-08 | 4.08533E-06 |
| TOR1B     |   | 9  | 129803157..129811281         | ENSG00000136816 | 27.16976 | 0.633538  | 4.26646E-08 | 4.10141E-06 |
| TAP2      |   | 6  | complement(32821833..3283877 | ENSG00000204267 | 38.69986 | 0.681925  | 4.39606E-08 | 4.19838E-06 |
| DOCK4     |   | 7  | complement(111726110..112206 | ENSG00000128512 | 7.598699 | 0.576378  | 4.67833E-08 | 4.43895E-06 |
| IFI27     |   | 14 | 94104836..94116698           | ENSG00000165949 | 36.36334 | 0.794426  | 5.2301E-08  | 4.93047E-06 |
| UBA7      |   | 3  | complement(49805209..4981395 | ENSG00000182179 | 14.83577 | 0.630899  | 6.10295E-08 | 5.70996E-06 |
| ADD3      |   | 10 | 109996368..110135565         | ENSG00000148700 | 5.082668 | -0.570126 | 6.13512E-08 | 5.70996E-06 |
| GBP3      |   | 1  | complement(89006679..8902289 | ENSG00000117226 | 20.22413 | 0.439857  | 6.38304E-08 | 5.86597E-06 |
| ZBP1      |   | 20 | complement(57603846..5762057 | ENSG00000124256 | 1.03925  | 1.692746  | 6.34764E-08 | 5.86597E-06 |
| GMPR      |   | 6  | 16238587..16295549           | ENSG00000137198 | 17.21284 | 1.089199  | 6.45288E-08 | 5.89309E-06 |
| STON1     |   | 2  | 48529383..48598513           | ENSG00000243244 | 1.447743 | 1.262361  | 6.59038E-08 | 5.94436E-06 |
| STING1    |   | 5  | complement(139475533..139482 | ENSG00000184584 | 14.10322 | 0.748009  | 6.55971E-08 | 5.94436E-06 |
| GAS2L3    |   | 12 | 100573683..100628288         | ENSG00000139354 | 3.283345 | -0.485335 | 6.97481E-08 | 6.25251E-06 |
| PARP12    |   | 7  | complement(140023749..140062 | ENSG00000059378 | 32.52458 | 0.613788  | 8.40749E-08 | 7.49087E-06 |
| MMD       |   | 17 | complement(55392622..5542192 | ENSG00000108960 | 10.95124 | -0.463735 | 8.51606E-08 | 7.49619E-06 |
| APOBEC3G  |   | 22 | 39077067..39087743           | ENSG00000239713 | 8.369537 | 0.76392   | 8.5047E-08  | 7.49619E-06 |
| SIK2      |   | 11 | 111602449..111730855         | ENSG00000170145 | 9.411975 | -0.429447 | 8.93772E-08 | 7.82023E-06 |
| CCL24     |   | 7  | complement(75810825..7582335 | ENSG00000106178 | 61.8226  | 0.884267  | 9.05203E-08 | 7.87311E-06 |
| SLC16A10  |   | 6  | 111087503..111231194         | ENSG00000112394 | 1.695196 | -0.600762 | 9.18151E-08 | 7.93847E-06 |

|           |    |                               |                 |          |           |             |             |
|-----------|----|-------------------------------|-----------------|----------|-----------|-------------|-------------|
| C1R       | 12 | complement(7080214..7092540)  | ENSG00000159403 | 0.882042 | 1.617387  | 9.73027E-08 | 8.36345E-06 |
| FCGR1B    | 1  | 121087345..121097161          | ENSG00000198019 | 4.323869 | 0.990086  | 9.93054E-08 | 8.48568E-06 |
| JAK2      | 9  | 4984390..5129948              | ENSG00000096968 | 6.482527 | 0.651763  | 9.99822E-08 | 8.49384E-06 |
| SELENOP   | 5  | complement(42799880..4288739) | ENSG00000250722 | 1.499014 | -1.89145  | 1.0669E-07  | 9.01131E-06 |
| SLC31A2   | 9  | 113150976..113164140          | ENSG00000136867 | 33.06632 | 0.697756  | 1.11268E-07 | 9.34396E-06 |
| ANGPT2    | 8  | complement(6499632..6563409)  | ENSG00000091879 | 3.790844 | -0.618641 | 1.14239E-07 | 9.53859E-06 |
| gene:ENSG | 7  | 99325879..99394653            | ENSG00000284292 | 1.619933 | -3.67752  | 1.153E-07   | 9.5725E-06  |
| IKZF2     | 2  | complement(212999691..213152) | ENSG00000030419 | 1.663374 | -0.581036 | 1.20217E-07 | 9.92436E-06 |
| RSAD2     | 2  | 6865557..6898239              | ENSG00000134321 | 34.65868 | 1.913605  | 1.22856E-07 | 1.00853E-05 |
| PTPN22    | 1  | complement(113813811..113871) | ENSG00000134242 | 4.536184 | -0.526895 | 1.24515E-07 | 1.01643E-05 |
| KLHDC8B   | 3  | 49171598..49176486            | ENSG00000185909 | 20.99318 | -0.528105 | 1.26507E-07 | 1.02696E-05 |
| HSD11B1   | 1  | 209686178..209734949          | ENSG00000117594 | 14.33367 | 0.980576  | 1.35349E-07 | 1.09267E-05 |
| IKBKE     | 1  | 206470476..206496889          | ENSG00000263528 | 16.71142 | 0.722294  | 1.38349E-07 | 1.11075E-05 |
| MX2       | 21 | 41361999..41409393            | ENSG00000183486 | 13.39512 | 1.762211  | 1.63615E-07 | 1.30641E-05 |
| TMEM170E  | 6  | 11537749..11583524            | ENSG00000205269 | 3.249403 | -0.453865 | 1.87662E-07 | 1.49028E-05 |
| APOL4     | 22 | complement(36189124..3620484) | ENSG00000100336 | 5.974058 | 1.155853  | 1.97152E-07 | 1.55718E-05 |
| DTX3L     | 3  | 122564338..122575203          | ENSG00000163840 | 13.81315 | 0.593019  | 2.07844E-07 | 1.6328E-05  |
| IFIT5     | 10 | 89414568..89421605            | ENSG00000152778 | 6.93844  | 0.654018  | 2.14133E-07 | 1.67321E-05 |
| CISH      | 3  | complement(50606489..5061177) | ENSG00000114737 | 11.95203 | 0.669125  | 2.66781E-07 | 2.07352E-05 |
| PNPLA3    | 22 | 43923792..43964488            | ENSG00000100344 | 3.383018 | -0.805334 | 2.69454E-07 | 2.08321E-05 |
| CD47      | 3  | complement(108043091..108091) | ENSG00000196776 | 21.17849 | 0.464696  | 2.80439E-07 | 2.15672E-05 |
| IFI16     | 1  | 158999968..159055155          | ENSG00000163565 | 25.65217 | 0.588741  | 2.90548E-07 | 2.22277E-05 |
| CD274     | 9  | 5450503..5470566              | ENSG00000120217 | 44.47215 | 0.824073  | 3.07439E-07 | 2.33974E-05 |
| IRF1      | 5  | complement(132440440..132508) | ENSG00000125347 | 32.43316 | 0.876852  | 3.14972E-07 | 2.38465E-05 |
| FUCA1     | 1  | complement(23845077..2386829) | ENSG00000179163 | 103.8166 | -0.618658 | 3.29501E-07 | 2.48179E-05 |
| ITIH4     | 3  | complement(52812962..5283068) | ENSG00000055955 | 0.963786 | 1.403986  | 3.58743E-07 | 2.68818E-05 |
| GCHFR     | 15 | 40764068..40767708            | ENSG00000137880 | 79.8694  | -0.612436 | 3.61399E-07 | 2.69427E-05 |
| CPT1B     | 22 | complement(50568861..5057846) | ENSG00000205560 | 3.288857 | 0.791224  | 3.87114E-07 | 2.87133E-05 |
| NFE2L3    | 7  | 26152198..26187137            | ENSG00000050344 | 2.99983  | 0.879902  | 4.21294E-07 | 3.10906E-05 |
| IL4I1     | 19 | complement(49889654..4992953) | ENSG00000104951 | 15.74521 | 0.993181  | 4.26624E-07 | 3.13258E-05 |
| MEFV      | 16 | complement(3242027..3256633)  | ENSG00000103313 | 1.131043 | 1.209372  | 4.36403E-07 | 3.18836E-05 |
| TMEM37    | 2  | 119429901..119438504          | ENSG00000171227 | 0.985329 | -1.730297 | 4.72293E-07 | 3.43341E-05 |
| PLAU      | 10 | 73909177..73917496            | ENSG00000122861 | 12.80791 | 0.427564  | 4.80653E-07 | 3.47688E-05 |
| LSS       | 21 | complement(46188141..4622882) | ENSG00000160285 | 16.80333 | 0.604544  | 5.20302E-07 | 3.74515E-05 |
| SPRED1    | 15 | 38252836..38357249            | ENSG00000166068 | 12.01156 | 0.52577   | 5.25036E-07 | 3.7607E-05  |
| CD48      | 1  | complement(160678746..160711) | ENSG00000117091 | 8.298441 | 0.72873   | 7.07863E-07 | 5.04551E-05 |
| SCARF1    | 17 | complement(1633858..1645744)  | ENSG00000074660 | 4.220269 | 0.75647   | 7.28186E-07 | 5.16517E-05 |
| PTGFRN    | 1  | 116909916..116990353          | ENSG00000134247 | 2.524888 | -0.530437 | 7.62333E-07 | 5.38126E-05 |
| RCAN2     | 6  | complement(46220736..4649197) | ENSG00000172348 | 0.921865 | 1.52781   | 7.88401E-07 | 5.53852E-05 |
| PSMB10    | 16 | complement(67934506..6793686) | ENSG00000205220 | 78.07665 | 0.509374  | 8.01923E-07 | 5.60655E-05 |
| ACSF2     | 17 | 50426158..50474845            | ENSG00000167107 | 9.53252  | -0.434956 | 9.25451E-07 | 6.43937E-05 |
| CBX6      | 22 | complement(38861422..3887224) | ENSG00000183741 | 5.267047 | 0.421985  | 9.37994E-07 | 6.49572E-05 |
| MPZL2     | 11 | complement(118253416..118264) | ENSG00000149573 | 2.318974 | -0.825372 | 9.49935E-07 | 6.54738E-05 |
| TRIM21    | 11 | complement(4384897..4393702)  | ENSG00000132109 | 25.24479 | 0.565589  | 9.87935E-07 | 6.77733E-05 |
| NCF1      | 7  | 74773962..74789376            | ENSG00000158517 | 170.5081 | 1.001534  | 1.00186E-06 | 6.8407E-05  |
| C17orf49  | 17 | 7014495..7017525              | ENSG00000258315 | 11.59489 | 0.469696  | 1.01041E-06 | 6.86701E-05 |
| MYO7B     | 2  | 127535802..127637729          | ENSG00000169994 | 0.94178  | 0.745777  | 1.01751E-06 | 6.88329E-05 |
| SOX4      | 6  | 21593751..21598619            | ENSG00000124766 | 4.847022 | -0.587153 | 1.03005E-06 | 6.90417E-05 |
| SORL1     | 11 | 121452314..121633763          | ENSG00000137642 | 1.864159 | -0.47411  | 1.02823E-06 | 6.90417E-05 |
| STMN1     | 1  | complement(25884181..2590699) | ENSG00000117632 | 8.251388 | -0.658018 | 1.09868E-06 | 7.31163E-05 |
| SLC41A2   | 12 | complement(104801801..104958) | ENSG00000136052 | 4.724132 | 0.605439  | 1.10085E-06 | 7.31163E-05 |
| AGRN      | 1  | 1020120..1056118              | ENSG00000188157 | 8.351724 | 0.651215  | 1.12756E-06 | 7.45515E-05 |
| SLC25A28  | 10 | complement(99610522..9962060) | ENSG00000155287 | 15.28968 | 0.569432  | 1.17467E-06 | 7.73165E-05 |
| ARID5A    | 2  | 96536743..96552634            | ENSG00000196843 | 18.64741 | 0.397618  | 1.18488E-06 | 7.76392E-05 |
| MLKL      | 16 | complement(74671855..7470096) | ENSG00000168404 | 21.17735 | 0.398838  | 1.22539E-06 | 7.99348E-05 |
| CCL15     | 17 | complement(35996440..3600155) | ENSG00000275718 | 19.32062 | 1.468856  | 1.27401E-06 | 8.27371E-05 |
| METTL1    | 12 | complement(57768471..5777211) | ENSG00000037897 | 19.87377 | 0.415798  | 1.32933E-06 | 8.59476E-05 |
| MLLT6     | 17 | 38705273..38729795            | ENSG00000275023 | 8.523915 | 0.525696  | 1.37733E-06 | 8.86589E-05 |

|            |    |                               |                 |          |           |             |             |
|------------|----|-------------------------------|-----------------|----------|-----------|-------------|-------------|
| CLEC4E     | 12 | complement(8533305..8540905)  | ENSG00000166523 | 17.74522 | 0.815034  | 1.42503E-06 | 9.13269E-05 |
| CD22       | 19 | 35319261..35347361            | ENSG0000012124  | 6.784367 | -0.438816 | 1.48078E-06 | 9.44857E-05 |
| ECSCR      | 5  | complement(139448560..139462) | ENSG00000249751 | 7.405064 | 1.070521  | 1.49486E-06 | 9.49688E-05 |
| HADH       | 4  | 107989714..108035241          | ENSG00000138796 | 6.578969 | -0.500986 | 1.50973E-06 | 9.54983E-05 |
| TRPM2      | 21 | 44350163..44443081            | ENSG00000142185 | 1.637018 | 0.7453    | 1.63281E-06 | 0.000102839 |
| TRIM26     | 6  | complement(30184455..3021342) | ENSG00000234127 | 21.13482 | 0.38706   | 1.70185E-06 | 0.000106727 |
| IQGAP3     | 1  | complement(156525405..156572) | ENSG00000183856 | 3.213257 | -0.437984 | 1.72296E-06 | 0.000107131 |
| FBXO10     | 9  | complement(37510892..3757638) | ENSG00000147912 | 3.345104 | -0.436361 | 1.71697E-06 | 0.000107131 |
| ATF5       | 19 | 49928702..49933935            | ENSG00000169136 | 18.82582 | 0.464233  | 1.84354E-06 | 0.000114143 |
| SSPN       | 12 | 26121991..26299290            | ENSG00000123096 | 3.761352 | 0.649098  | 1.89123E-06 | 0.000116602 |
| RETREG1    | 5  | complement(16473038..1661710) | ENSG00000154153 | 21.39794 | -0.516855 | 1.99125E-06 | 0.000122253 |
| UBE2F-SCL  | 2  | 237967014..238099412          | ENSG00000258984 | 0.285905 | 3.727595  | 2.10982E-06 | 0.000128693 |
| RNF31      | 14 | 24146683..24160660            | ENSG00000092098 | 8.771209 | 0.401745  | 2.11377E-06 | 0.000128693 |
| PECR       | 2  | complement(215996329..216082) | ENSG00000115425 | 2.993046 | -0.768487 | 2.19109E-06 | 0.000132847 |
| ATOX1      | 5  | complement(151742316..151772) | ENSG00000177556 | 10.72813 | 0.389337  | 2.22031E-06 | 0.000134062 |
| VDR        | 12 | complement(47841537..4794304) | ENSG00000111424 | 12.93669 | 0.382976  | 2.23544E-06 | 0.000134421 |
| CD302      | 2  | complement(159768628..159798) | ENSG00000241399 | 4.352604 | -0.490996 | 2.27163E-06 | 0.000136037 |
| IL1RN      | 2  | 113107214..113134016          | ENSG00000136689 | 1260.832 | 0.661796  | 2.29855E-06 | 0.00013684  |
| ACKR3      | 2  | 236567787..236582354          | ENSG00000144476 | 2.311207 | -0.910157 | 2.30376E-06 | 0.00013684  |
| CHDH       | 3  | complement(53812335..5384641) | ENSG0000016391  | 1.985078 | -0.63336  | 2.34271E-06 | 0.00013859  |
| PPA1       | 10 | complement(70202835..7023391) | ENSG00000180817 | 27.04386 | 0.394735  | 2.37724E-06 | 0.000140065 |
| RHBDP2     | 17 | complement(76470891..7650179) | ENSG00000129667 | 16.47747 | 0.527428  | 2.49383E-06 | 0.000146345 |
| COQ8A      | 1  | 226940286..226987544          | ENSG00000163050 | 6.306162 | -0.51418  | 2.51996E-06 | 0.000147287 |
| TLR2       | 4  | 153684070..153706260          | ENSG00000137462 | 15.88173 | 0.647306  | 2.53201E-06 | 0.000147401 |
| TMEM229E   | 14 | complement(67447084..6753373) | ENSG00000198133 | 0.657621 | 0.95748   | 2.55192E-06 | 0.000147971 |
| STK39      | 2  | complement(167954020..168247) | ENSG00000198648 | 3.996715 | -0.466253 | 2.61067E-06 | 0.000150185 |
| HESX1      | 3  | complement(57197838..5722760) | ENSG00000163666 | 1.387571 | 2.116417  | 2.60866E-06 | 0.000150185 |
| F3         | 1  | complement(94529173..9454175) | ENSG00000117525 | 19.11249 | 0.966994  | 2.65344E-06 | 0.000151945 |
| P2RY1      | 3  | 152835131..152841439          | ENSG00000169860 | 11.34962 | -0.380535 | 2.66205E-06 | 0.000151945 |
| CNP        | 17 | 41966763..41977740            | ENSG00000173786 | 10.9427  | 0.495634  | 2.74548E-06 | 0.000156097 |
| TUT1       | 11 | complement(62575045..6259163) | ENSG00000149016 | 26.63135 | 0.64545   | 2.85261E-06 | 0.000161559 |
| SAMD9      | 7  | complement(93099513..9311802) | ENSG00000205413 | 8.131122 | 0.767591  | 2.8671E-06  | 0.000161753 |
| ZNF589     | 3  | 48241100..48299253            | ENSG00000164048 | 11.60772 | -0.561559 | 2.92181E-06 | 0.000162952 |
| TBC1D4     | 13 | complement(75283503..7548216) | ENSG00000136111 | 3.666814 | -0.408772 | 2.91931E-06 | 0.000162952 |
| PSTPIP2    | 18 | complement(45983536..4607227) | ENSG00000152229 | 13.11275 | 1.032695  | 2.90731E-06 | 0.000162952 |
| CTNS       | 17 | 3636459..3663103              | ENSG0000040531  | 11.50102 | 0.384061  | 2.95704E-06 | 0.00016429  |
| CMTR1      | 6  | 37433219..37482827            | ENSG00000137200 | 11.2629  | 0.448792  | 3.03169E-06 | 0.0001678   |
| HCAR2      | 12 | complement(122701293..122703) | ENSG00000182782 | 19.37386 | 0.676028  | 3.25197E-06 | 0.000179312 |
| CSRNP1     | 3  | complement(39141855..3915456) | ENSG00000144655 | 13.27267 | 0.588972  | 3.26774E-06 | 0.000179505 |
| PNPT1      | 2  | complement(55634061..5569386) | ENSG00000138035 | 9.487355 | 0.701527  | 3.30037E-06 | 0.000180618 |
| TRAF2      | 9  | 136881912..136926607          | ENSG00000127191 | 6.785635 | 0.492562  | 3.32508E-06 | 0.000181291 |
| SLC25A29   | 14 | complement(100291116..100306) | ENSG00000197119 | 7.788863 | -0.388121 | 3.47874E-06 | 0.000188964 |
| SIPA1L1    | 14 | 71320449..71741229            | ENSG00000197555 | 1.394227 | 0.540057  | 3.58005E-06 | 0.000193747 |
| HTD2       | 3  | 58306262..58320193            | ENSG00000255154 | 2.20299  | 0.688618  | 3.62887E-06 | 0.000195665 |
| FND5       | 1  | complement(32862268..3287248) | ENSG00000160097 | 0.441879 | -1.83791  | 3.66462E-06 | 0.000196866 |
| OPTN       | 10 | 13099449..13138308            | ENSG00000123240 | 45.05428 | 0.672277  | 3.71681E-06 | 0.000198938 |
| EEPD1      | 7  | 36153254..36301538            | ENSG00000122547 | 8.153997 | -0.460417 | 3.84847E-06 | 0.000205233 |
| SLC29A1    | 6  | 44219553..44234142            | ENSG00000112759 | 6.57705  | -0.409064 | 4.52768E-06 | 0.000240576 |
| SLC39A8    | 4  | complement(102251080..102431) | ENSG00000138821 | 8.40817  | 0.674847  | 4.69211E-06 | 0.00024841  |
| ISY1-RAB43 | 3  | complement(129087575..129161) | ENSG00000261796 | 6.490515 | 0.537736  | 4.8023E-06  | 0.000253326 |
| HIVEP3     | 1  | complement(41506365..4203592) | ENSG00000127124 | 2.289505 | 0.545886  | 5.16383E-06 | 0.000271417 |
| CYP27B1    | 12 | complement(57762334..5776898) | ENSG00000111012 | 3.252821 | 1.019221  | 5.30435E-06 | 0.000277804 |
| SORBS1     | 10 | complement(95311771..9556141) | ENSG00000095637 | 2.48923  | 0.513756  | 5.8962E-06  | 0.000307697 |
| gene:ENSG  | 11 | complement(62559603..6259153) | ENSG00000255508 | 3.370313 | 0.743299  | 6.24068E-06 | 0.000323364 |
| RIN2       | 20 | 19757606..20002457            | ENSG00000132669 | 8.095979 | 0.382441  | 6.22017E-06 | 0.000323364 |
| KIAA0040   | 1  | complement(175156986..175192) | ENSG00000235750 | 2.464401 | 0.534001  | 6.36955E-06 | 0.000328876 |
| ST3GAL5    | 2  | complement(85837120..8590519) | ENSG00000115525 | 5.395183 | 0.424365  | 6.42118E-06 | 0.000329215 |
| GIMAP2     | 7  | 150685697..150693641          | ENSG00000106560 | 15.22422 | 0.396372  | 6.41185E-06 | 0.000329215 |

|           |   |    |                               |                 |          |           |             |             |
|-----------|---|----|-------------------------------|-----------------|----------|-----------|-------------|-------------|
| ERMP1     |   | 9  | complement(5765076..5833117)  | ENSG00000099219 | 12.53824 | -0.364305 | 6.53912E-06 | 0.000333988 |
| BST2      |   | 19 | complement(17402939..1740563) | ENSG00000130303 | 280.476  | 0.573725  | 6.55998E-06 | 0.000333988 |
| MAP3K1    |   | 5  | 56815549..56896152            | ENSG00000095015 | 2.638416 | -0.410135 | 6.67205E-06 | 0.000338514 |
| gene:ENSG |   | 11 | 65261928..65326543            | ENSG00000285816 | 0.930991 | 1.055415  | 6.80534E-06 | 0.000344082 |
| ADORA3    |   | 1  | complement(111499429..111503) | ENSG00000282608 | 1.456768 | -1.521317 | 6.87015E-06 | 0.000346161 |
| FAM72D    |   | 1  | 145095974..145112696          | ENSG00000215784 | 0.264022 | 4.206111  | 7.07343E-06 | 0.000355179 |
| MS4A6A    |   | 11 | complement(60172015..6018466) | ENSG00000110077 | 2.084332 | -0.958637 | 7.69807E-06 | 0.00038522  |
| PPP2R1B   |   | 11 | complement(111726908..111766) | ENSG00000137713 | 10.08223 | -0.364335 | 7.859E-06   | 0.000391931 |
| ATP9A     |   | 20 | complement(51596514..5176839) | ENSG00000054793 | 4.096525 | -0.434407 | 8.32285E-06 | 0.000413651 |
| FHL1      | X |    | 136146702..136211359          | ENSG00000022267 | 13.14913 | -0.532292 | 8.36449E-06 | 0.000414311 |
| LMNB1     |   | 5  | 126776623..126837020          | ENSG00000113368 | 2.393361 | 0.622553  | 8.69309E-06 | 0.000429044 |
| CBWD6     |   | 9  | complement(41131306..4119926) | ENSG00000215126 | 1.85265  | 0.704716  | 8.72064E-06 | 0.000429044 |
| GALM      |   | 2  | 38666081..38741237            | ENSG00000143891 | 6.98205  | -0.518785 | 9.2766E-06  | 0.000453343 |
| BTN3A3    |   | 6  | 26440472..26453415            | ENSG00000111801 | 5.330902 | 0.410798  | 9.25055E-06 | 0.000453343 |
| SP140L    |   | 2  | 230327184..230403732          | ENSG00000185404 | 9.185013 | 0.36961   | 1.08999E-05 | 0.000529943 |
| GPAT3     |   | 4  | 83535914..83605875            | ENSG00000138678 | 32.18164 | -0.461402 | 1.09384E-05 | 0.000529943 |
| ICAM1     |   | 19 | 10271093..10286615            | ENSG00000090339 | 88.65154 | 0.948697  | 1.09528E-05 | 0.000529943 |
| EIF3CL    |   | 16 | complement(28379579..2840384) | ENSG00000205609 | 4.914143 | -0.581483 | 1.10305E-05 | 0.000531938 |
| RNF19B    |   | 1  | complement(32936445..3296480) | ENSG00000116514 | 27.24603 | 0.62362   | 1.16729E-05 | 0.000561069 |
| JAK3      |   | 19 | complement(17824780..1784807) | ENSG00000105639 | 0.369384 | 1.109219  | 1.17649E-05 | 0.000563633 |
| ANGPT4    |   | 20 | complement(869900..916334)    | ENSG00000101280 | 0.866185 | -1.364013 | 1.18613E-05 | 0.000566399 |
| YPEL2     |   | 17 | 59331655..59401729            | ENSG00000175155 | 1.552135 | -0.63484  | 1.21311E-05 | 0.000577393 |
| CCL13     |   | 17 | 34356480..34358610            | ENSG00000181374 | 1.566283 | 2.044993  | 1.25203E-05 | 0.000593985 |
| THBS1     |   | 15 | 39581079..39599466            | ENSG00000137801 | 4.510754 | -0.65221  | 1.29618E-05 | 0.000612939 |
| RELB      |   | 19 | 45001449..45038198            | ENSG00000104856 | 18.37503 | 0.657592  | 1.33295E-05 | 0.000628294 |
| ARL4C     |   | 2  | complement(234493041..234497) | ENSG00000188042 | 2.138169 | -0.609275 | 1.38897E-05 | 0.000652592 |
| TMEM176B  |   | 7  | complement(150791285..150801) | ENSG00000106565 | 6.78604  | 0.480518  | 1.42102E-05 | 0.000665513 |
| FAM13A    |   | 4  | complement(88725955..8911139) | ENSG00000138640 | 1.715727 | -0.490932 | 1.50613E-05 | 0.000703118 |
| REV3L     |   | 6  | complement(111299028..111483) | ENSG00000009413 | 1.822175 | -0.389155 | 1.56562E-05 | 0.000728563 |
| IRS2      |   | 13 | complement(109752695..109786) | ENSG00000185950 | 4.537434 | -0.500015 | 1.5891E-05  | 0.000737141 |
| CA12      |   | 15 | complement(63321378..6338184) | ENSG00000074410 | 3.184646 | 0.643315  | 1.63244E-05 | 0.000754847 |
| PECAM1    |   | 17 | complement(64319415..6441377) | ENSG00000261371 | 44.76464 | -0.53778  | 1.64654E-05 | 0.000758966 |
| ODF3B     |   | 22 | complement(50529710..5053250) | ENSG00000177989 | 4.80422  | 0.664937  | 1.66919E-05 | 0.000766987 |
| FCGR1A    |   | 1  | 149782671..149791675          | ENSG00000150337 | 49.08507 | 0.622089  | 1.71961E-05 | 0.000787678 |
| LYSMD2    |   | 15 | complement(51723011..5175158) | ENSG00000140280 | 7.69642  | 0.533292  | 1.7269E-05  | 0.000788546 |
| FSCN1     |   | 7  | 5592816..5606655              | ENSG00000075618 | 5.372958 | 0.632748  | 1.74013E-05 | 0.000792111 |
| HES2      |   | 1  | complement(6412418..6424670)  | ENSG00000069812 | 11.86323 | -0.525429 | 1.76845E-05 | 0.000795096 |
| BATF3     |   | 1  | complement(212686417..212699) | ENSG00000123685 | 14.90461 | 0.578504  | 1.76516E-05 | 0.000795096 |
| CYRIA     |   | 2  | complement(16549459..1666633) | ENSG00000197872 | 4.89832  | -0.458228 | 1.76101E-05 | 0.000795096 |
| MMP1      |   | 11 | complement(102789401..102798) | ENSG00000196611 | 39.26134 | 0.510544  | 1.75992E-05 | 0.000795096 |
| MXI1      |   | 10 | 110207605..110287365          | ENSG00000119950 | 2.814366 | -0.590316 | 1.7883E-05  | 0.000801555 |
| EDN1      |   | 6  | 12290361..12297194            | ENSG00000078401 | 21.46098 | 0.836389  | 1.83023E-05 | 0.00081784  |
| SCG5      |   | 15 | 32641676..32697098            | ENSG00000166922 | 12.36344 | 0.545783  | 1.8474E-05  | 0.000822995 |
| SCD       |   | 10 | 100347233..100364826          | ENSG00000099194 | 199.9672 | -0.527754 | 1.94072E-05 | 0.000861939 |
| TNS1      |   | 2  | complement(217799588..218033) | ENSG00000079308 | 5.825498 | -0.526589 | 2.20854E-05 | 0.000974961 |
| MMP2      |   | 16 | 55389700..55506691            | ENSG00000087245 | 9.431566 | -0.41575  | 2.2078E-05  | 0.000974961 |
| IFITM1    |   | 11 | 310041..315272                | ENSG00000185885 | 1.131149 | 1.75556   | 2.262E-05   | 0.000995551 |
| UXS1      |   | 2  | complement(106093308..106194) | ENSG00000115652 | 23.21068 | 0.412413  | 2.37645E-05 | 0.001042783 |
| TMED7-TIC |   | 5  | complement(115578642..115626) | ENSG00000251201 | 5.166356 | 0.427247  | 2.45988E-05 | 0.001072949 |
| HS3ST3B1  |   | 17 | 14301081..14349404            | ENSG00000125430 | 1.863629 | 1.011738  | 2.45672E-05 | 0.001072949 |
| UNC5B     |   | 10 | 71212570..71302864            | ENSG00000107731 | 2.53775  | -0.452088 | 2.48352E-05 | 0.001080037 |
| RAP2B     |   | 3  | 153162226..153170627          | ENSG00000181467 | 7.28722  | -0.345951 | 2.49141E-05 | 0.001080253 |
| gene:ENSG |   | 7  | complement(92131774..9224592) | ENSG00000285953 | 0.434283 | -3.959084 | 2.63092E-05 | 0.001137367 |
| OR2A4     |   | 6  | complement(131699644..131701) | ENSG00000180658 | 0.518926 | -4.285851 | 2.70364E-05 | 0.001165355 |
| CH25H     |   | 10 | complement(89205629..8920731) | ENSG00000138135 | 1.885933 | 1.387586  | 2.82483E-05 | 0.001210453 |
| PANX1     |   | 11 | 94128841..94181968            | ENSG00000110218 | 6.337599 | 0.418633  | 2.82445E-05 | 0.001210453 |
| MCOLN2    |   | 1  | complement(84925583..8499711) | ENSG00000153898 | 0.91586  | 1.166205  | 3.05201E-05 | 0.001303978 |
| GAPT      |   | 5  | 58491435..58497090            | ENSG00000175857 | 1.118348 | -1.000693 | 3.08992E-05 | 0.001316322 |

|           |   |    |                              |                 |          |           |             |             |
|-----------|---|----|------------------------------|-----------------|----------|-----------|-------------|-------------|
| ABCC5     |   | 3  | complement(183919934..184017 | ENSG00000114770 | 2.325092 | -0.467702 | 3.10983E-05 | 0.001317525 |
| MASTL     |   | 10 | 27154824..27187953           | ENSG00000120539 | 2.624016 | 0.620574  | 3.11077E-05 | 0.001317525 |
| ZBTB4     |   | 17 | complement(7459366..7484263) | ENSG00000174282 | 9.503163 | -0.340736 | 3.13864E-05 | 0.001325484 |
| SLC46A2   |   | 9  | complement(112878920..112890 | ENSG00000119457 | 2.571382 | -0.645637 | 3.14948E-05 | 0.001326229 |
| APOBEC3F  |   | 22 | 39040604..39055972           | ENSG00000128394 | 0.447993 | 0.993717  | 3.24454E-05 | 0.001362335 |
| STIMATE   |   | 3  | complement(52836219..5289754 | ENSG00000213533 | 7.76448  | 0.421555  | 3.3765E-05  | 0.001413681 |
| PRAM1     |   | 19 | complement(8490056..8502640) | ENSG00000133246 | 17.93403 | -0.350768 | 3.42933E-05 | 0.001431697 |
| RBCK1     |   | 20 | 407498..432139               | ENSG00000125826 | 14.33697 | 0.391632  | 3.44414E-05 | 0.001433781 |
| SPTBN1    |   | 2  | 54456317..54671446           | ENSG00000115306 | 0.483286 | -0.679829 | 3.46265E-05 | 0.001437394 |
| PYGL      |   | 14 | complement(50857891..5094448 | ENSG00000100504 | 29.54763 | -0.384198 | 3.47425E-05 | 0.001438124 |
| HES6      |   | 2  | complement(238238267..238240 | ENSG00000144485 | 4.942333 | -0.678873 | 3.54617E-05 | 0.001463745 |
| BTN2A2    |   | 6  | 26383096..26394874           | ENSG00000124508 | 10.53403 | 0.42914   | 3.59537E-05 | 0.001479875 |
| LRRC25    |   | 19 | complement(18391137..1839762 | ENSG00000175489 | 15.09888 | -0.467214 | 3.60956E-05 | 0.001481542 |
| AQP3      |   | 9  | complement(33441156..3344759 | ENSG00000165272 | 58.58906 | 0.560997  | 3.64603E-05 | 0.00149232  |
| TIPARP    |   | 3  | 156673235..156706770         | ENSG00000163659 | 12.29623 | -0.33732  | 3.75565E-05 | 0.001532893 |
| POLR3D    |   | 8  | 22245133..22254601           | ENSG00000168495 | 4.562602 | 0.359008  | 3.81535E-05 | 0.00155292  |
| ZKSCAN8   |   | 6  | 28141883..28159460           | ENSG00000198315 | 3.098235 | -0.484947 | 4.02216E-05 | 0.001632552 |
| FCMR      |   | 1  | complement(206903317..206923 | ENSG00000162894 | 10.1367  | -0.612479 | 4.06416E-05 | 0.001645026 |
| WFIKK2    |   | 17 | 50834650..50842353           | ENSG00000173714 | 3.741767 | -0.509618 | 4.18952E-05 | 0.001691085 |
| gene:ENSG |   | 7  | complement(1815804..2242215) | ENSG00000286192 | 0.090166 | 4.849252  | 4.26757E-05 | 0.001717843 |
| FCHO1     |   | 19 | 17747718..17788568           | ENSG00000130475 | 2.066995 | -0.553371 | 4.28708E-05 | 0.001720957 |
| GTF2B     |   | 1  | complement(88852633..8889194 | ENSG00000137947 | 20.78915 | 0.371911  | 4.34841E-05 | 0.001740792 |
| SESN1     |   | 6  | complement(108986437..109094 | ENSG00000080546 | 4.872694 | -0.370374 | 4.37295E-05 | 0.001745835 |
| OSBPL11   |   | 3  | complement(125528858..125595 | ENSG00000144909 | 23.00259 | -0.325759 | 4.48853E-05 | 0.001763264 |
| TDRD7     |   | 9  | 97412096..97496125           | ENSG00000196116 | 11.86886 | 0.453658  | 4.48901E-05 | 0.001763264 |
| CCL23     |   | 17 | complement(36013056..3601797 | ENSG00000274736 | 31.41274 | 0.563185  | 4.46015E-05 | 0.001763264 |
| KCNN4     |   | 19 | complement(43766533..4378125 | ENSG00000104783 | 36.61114 | 0.462607  | 4.48739E-05 | 0.001763264 |
| ZNF1      |   | 20 | complement(49237946..4927842 | ENSG00000124201 | 19.89827 | 0.482432  | 4.47382E-05 | 0.001763264 |
| KREMEN1   |   | 22 | 29073035..29168333           | ENSG00000183762 | 1.269503 | 0.841242  | 4.47287E-05 | 0.001763264 |
| FCRL6     |   | 1  | 159800511..159816257         | ENSG00000181036 | 0.503157 | 1.578235  | 4.62258E-05 | 0.00181086  |
| PDE4B     |   | 1  | 65792514..66374579           | ENSG00000184588 | 1.850282 | 0.928933  | 4.63754E-05 | 0.001811864 |
| KLHL24    |   | 3  | 183635610..183684519         | ENSG00000114796 | 2.020136 | -0.420138 | 4.70371E-05 | 0.001823094 |
| CGAS      |   | 6  | complement(73413515..7345229 | ENSG00000164430 | 5.158125 | 0.368712  | 4.70289E-05 | 0.001823094 |
| MBNL3     | X |    | complement(132369317..132489 | ENSG00000076770 | 1.301302 | -0.380452 | 4.6984E-05  | 0.001823094 |
| SSH2      |   | 17 | complement(29625938..2993027 | ENSG00000141298 | 5.788118 | -0.331389 | 4.72999E-05 | 0.00182843  |
| DDIT4L    |   | 4  | complement(100185870..100190 | ENSG00000145358 | 2.442209 | -0.648048 | 4.76279E-05 | 0.001836252 |
| TFPI2     |   | 7  | complement(93885396..9389075 | ENSG00000105825 | 6.393739 | 0.69781   | 4.79887E-05 | 0.001845292 |
| TRAFD1    |   | 12 | 112125538..112153604         | ENSG00000135148 | 20.01368 | 0.329064  | 4.87362E-05 | 0.001864225 |
| ITGB3     |   | 17 | 47253827..47313743           | ENSG00000259207 | 5.879727 | 0.346145  | 4.87336E-05 | 0.001864225 |
| SLC46A3   |   | 13 | complement(28700064..2871897 | ENSG00000139508 | 5.787523 | -0.370906 | 5.20784E-05 | 0.001986865 |
| LY6E      |   | 8  | 143017982..143023832         | ENSG00000160932 | 128.3292 | 0.542077  | 5.26301E-05 | 0.002002684 |
| TNFRSF21  |   | 6  | complement(47231532..4730990 | ENSG00000146072 | 37.51088 | -0.507448 | 5.42073E-05 | 0.002052013 |
| CYLD      |   | 16 | 50742050..50801935           | ENSG00000083799 | 7.13961  | 0.327588  | 5.41059E-05 | 0.002052013 |
| EEF1E1-BL |   | 6  | complement(8015726..8102530) | ENSG00000265818 | 0.714704 | -3.757234 | 5.66422E-05 | 0.002135504 |
| PLCG1     |   | 20 | 41136960..41196801           | ENSG00000124181 | 0.623043 | -0.652652 | 5.67052E-05 | 0.002135504 |
| SLC2A6    |   | 9  | complement(133471094..133479 | ENSG00000160326 | 40.57908 | 0.842887  | 5.90885E-05 | 0.002219541 |
| C4A       |   | 6  | 31982057..32002681           | ENSG00000244731 | 0.515752 | 1.151591  | 6.30898E-05 | 0.002363764 |
| PC        |   | 11 | complement(66848417..6695838 | ENSG00000173599 | 8.804496 | -0.393181 | 6.43932E-05 | 0.002406427 |
| SLITRK4   | X |    | complement(143622790..143636 | ENSG00000179542 | 1.326013 | -0.453414 | 6.49182E-05 | 0.002419859 |
| BAK1      |   | 6  | complement(33572547..3358029 | ENSG00000030110 | 30.72721 | 0.323781  | 6.59469E-05 | 0.002451949 |
| XRN1      |   | 3  | complement(142306607..142448 | ENSG00000114127 | 4.114745 | 0.51882   | 6.66919E-05 | 0.002473354 |
| UBD       |   | 6  | complement(29555515..2955973 | ENSG00000213886 | 2.709362 | 1.323918  | 6.76284E-05 | 0.002501738 |
| VLDLR     |   | 9  | 2621182..2660056             | ENSG00000147852 | 0.632252 | -0.610522 | 6.78503E-05 | 0.002503607 |
| NR1D2     |   | 3  | 23945286..23980617           | ENSG00000174738 | 5.530268 | -0.342193 | 6.85211E-05 | 0.002521991 |
| PLXNA1    |   | 3  | 126982693..127037389         | ENSG00000114554 | 8.314282 | 0.321212  | 6.92993E-05 | 0.002544225 |
| NEURL3    |   | 2  | complement(96497646..9650810 | ENSG00000163121 | 0.924296 | 1.266355  | 7.02377E-05 | 0.002572215 |
| CD109     |   | 6  | 73695785..73828316           | ENSG00000156535 | 8.154787 | -0.320406 | 7.2701E-05  | 0.002655766 |
| TREM2     |   | 6  | complement(41158506..4116318 | ENSG00000095970 | 109.8331 | -0.463308 | 7.32198E-05 | 0.002668049 |

|           |    |                               |                 |          |           |             |             |
|-----------|----|-------------------------------|-----------------|----------|-----------|-------------|-------------|
| GTPBP1    | 22 | 38705742..38738299            | ENSG00000100226 | 7.758719 | 0.461244  | 7.68937E-05 | 0.002794953 |
| CCDC9B    | 15 | complement(40331452..4034096) | ENSG00000188549 | 2.503818 | -0.506202 | 7.95005E-05 | 0.002882533 |
| SERPINE1  | 7  | 101127104..101139247          | ENSG00000106366 | 40.08406 | 0.578412  | 8.06467E-05 | 0.002916855 |
| HPGD      | 4  | complement(174490175..174523) | ENSG00000164120 | 30.7245  | -0.492887 | 8.09694E-05 | 0.002921295 |
| IFNG      | 12 | complement(68154768..6815974) | ENSG00000111537 | 0.845467 | 2.448603  | 8.2126E-05  | 0.002955726 |
| NFKBIE    | 6  | complement(44258166..4426578) | ENSG00000146232 | 34.01679 | 0.536395  | 8.30588E-05 | 0.002981955 |
| PDCD1LG2  | 9  | 5510531..5571282              | ENSG00000197646 | 4.68477  | 0.502705  | 8.84934E-05 | 0.003169279 |
| HLA-F     | 6  | 29722775..29738528            | ENSG00000204642 | 64.38438 | 0.487459  | 9.09322E-05 | 0.00324866  |
| TSPAN15   | 10 | 69451465..69507666            | ENSG00000099282 | 9.120599 | -0.397735 | 9.20404E-05 | 0.00328023  |
| IL7R      | 5  | 35852695..35879603            | ENSG00000168685 | 102.168  | 0.80212   | 9.36565E-05 | 0.003329707 |
| C15orf48  | 15 | 45430579..45448761            | ENSG00000166920 | 229.3933 | 0.722246  | 9.86035E-05 | 0.003497075 |
| MAX       | 14 | complement(65006174..6510269) | ENSG00000125952 | 8.707597 | 0.320075  | 9.93153E-05 | 0.003513789 |
| HRH1      | 3  | 11137093..11263557            | ENSG00000196639 | 4.020739 | 0.434052  | 0.00010134  | 0.003576776 |
| IGSF6     | 16 | complement(21639550..2165260) | ENSG00000140749 | 110.2403 | 0.488606  | 0.000101996 | 0.003591255 |
| SH3PXD2A  | 10 | complement(103594027..103855) | ENSG00000107957 | 2.649188 | -0.334745 | 0.000106522 | 0.003741578 |
| ME1       | 6  | complement(83210402..8343105) | ENSG00000065833 | 9.971414 | -0.40289  | 0.000106822 | 0.00374314  |
| TAGAP     | 6  | complement(159034468..159045) | ENSG00000164691 | 10.56715 | 0.573099  | 0.000108438 | 0.003790672 |
| CASP4     | 11 | complement(104942866..104969) | ENSG00000196954 | 69.13269 | 0.346155  | 0.000109499 | 0.003818623 |
| CTTN      | 11 | 70398404..70436584            | ENSG00000085733 | 8.307177 | 0.391429  | 0.000112472 | 0.003912937 |
| TRIM56    | 7  | 101085481..101097967          | ENSG00000169871 | 6.00396  | 0.313328  | 0.000114879 | 0.003987201 |
| TDRD9     | 14 | 103928456..104052667          | ENSG00000156414 | 3.742262 | -0.543333 | 0.000115539 | 0.004000596 |
| VPS9D1    | 16 | complement(89707134..8972089) | ENSG00000075399 | 6.05076  | 0.514771  | 0.000115889 | 0.004003247 |
| CCND1     | 11 | 69641156..69654474            | ENSG00000110092 | 1.080473 | 0.670885  | 0.000116395 | 0.00401125  |
| CALHM6    | 6  | 116461370..116463771          | ENSG00000188820 | 4.213241 | 1.625894  | 0.000116687 | 0.004011839 |
| FUT4      | 11 | 94543921..94549895            | ENSG00000196371 | 4.637037 | 0.333168  | 0.000119584 | 0.004101793 |
| NCAPH2    | 22 | 50508224..50524780            | ENSG00000025770 | 8.36784  | 0.326983  | 0.000120958 | 0.004139194 |
| ATP7A     | X  | 77910656..78050395            | ENSG00000165240 | 2.650764 | -0.405208 | 0.000122997 | 0.004199134 |
| PRPF3     | 1  | 150321479..150353233          | ENSG00000117360 | 23.06857 | 0.314361  | 0.000126745 | 0.004317007 |
| RIN3      | 14 | 92513781..92688994            | ENSG00000100599 | 15.59675 | -0.404078 | 0.000127134 | 0.004320193 |
| ITPKB     | 1  | complement(226631690..226739) | ENSG00000143772 | 8.010685 | -0.386081 | 0.000130558 | 0.004423565 |
| HILPDA    | 7  | 128455849..128458418          | ENSG00000135245 | 37.92172 | -0.711885 | 0.000130782 | 0.004423565 |
| MAPK3     | 16 | complement(30114105..3012350) | ENSG00000102882 | 4.015768 | -0.373998 | 0.000135007 | 0.00455595  |
| HSPA6     | 1  | 161524540..161526894          | ENSG00000173110 | 31.74182 | -0.412652 | 0.000136255 | 0.004587477 |
| SPSB3     | 16 | complement(1776712..1793700)  | ENSG00000162032 | 7.734937 | -0.369016 | 0.000137156 | 0.004607183 |
| COL22A1   | 8  | complement(138588235..138914) | ENSG00000169436 | 0.79688  | 0.82119   | 0.000138236 | 0.004632813 |
| gene:ENSG | 3  | complement(49416777..4942931) | ENSG00000283189 | 0.763214 | -1.267592 | 0.000139179 | 0.00465374  |
| STIMATE-N | 3  | complement(52833121..5289756) | ENSG00000248592 | 2.430333 | 1.360959  | 0.000140763 | 0.00469594  |
| MOB3B     | 9  | complement(27325209..2752981) | ENSG00000120162 | 6.181295 | 0.430785  | 0.00014363  | 0.004780697 |
| CCR5      | 3  | 46370854..46376206            | ENSG00000160791 | 17.45501 | 0.312994  | 0.000148787 | 0.004941077 |
| C3        | 19 | complement(6677704..6730562)  | ENSG00000125730 | 20.00579 | 0.679442  | 0.000150189 | 0.004976336 |
| gene:ENSG | 19 | complement(35739252..3574543) | ENSG00000267120 | 0.273628 | 3.123356  | 0.000151254 | 0.005000275 |
| SBNO2     | 19 | complement(1107637..1174268)  | ENSG00000064932 | 18.72481 | 0.409407  | 0.000160138 | 0.005282012 |
| RND3      | 2  | complement(150468195..150539) | ENSG00000115963 | 15.5204  | 0.407081  | 0.000164403 | 0.005410477 |
| GALC      | 14 | complement(87837820..8799366) | ENSG00000054983 | 10.36544 | -0.309484 | 0.000172446 | 0.005662429 |
| YPEL3     | 16 | complement(30092314..3009691) | ENSG00000090238 | 2.165192 | -0.585794 | 0.000174338 | 0.005711707 |
| IMPA2     | 18 | 11981025..12030877            | ENSG00000141401 | 4.186435 | -0.477163 | 0.000176427 | 0.005767238 |
| BCL3      | 19 | 44747705..44760044            | ENSG00000069399 | 12.74205 | 0.588496  | 0.000182207 | 0.005942865 |
| NIBAN1    | 1  | complement(184790724..184974) | ENSG00000135842 | 17.46062 | 0.454749  | 0.00018302  | 0.0059561   |
| MICALL2   | 7  | complement(1428465..1459470)  | ENSG00000164877 | 3.725194 | 0.418406  | 0.000183806 | 0.005968377 |
| gene:ENSG | 19 | 7629796..7643048              | ENSG00000268400 | 8.577239 | -0.754991 | 0.000186895 | 0.006055241 |
| STAP1     | 4  | 67558727..67607337            | ENSG00000035720 | 1.62136  | 1.708342  | 0.000190841 | 0.006169402 |
| CREM      | 10 | 35126791..35212958            | ENSG00000095794 | 3.776073 | 0.375596  | 0.000195769 | 0.006300841 |
| ABHD4     | 14 | 22598237..22613215            | ENSG00000100439 | 29.38672 | -0.297224 | 0.000195513 | 0.006300841 |
| AMIGO3    | 3  | complement(49716829..4971968) | ENSG00000176020 | 0.257526 | -2.253107 | 0.000200708 | 0.006445592 |
| TNIK      | 3  | complement(171058414..171460) | ENSG00000154310 | 7.029647 | 0.517466  | 0.000210425 | 0.006728084 |
| P2RX7     | 12 | 121132819..121188032          | ENSG00000089041 | 18.7706  | 0.408103  | 0.000210179 | 0.006728084 |
| gene:ENSG | 19 | 18153158..18178117            | ENSG00000268173 | 0.127467 | -6.903525 | 0.000213444 | 0.006809713 |
| RCAN1     | 21 | complement(34513142..3461511) | ENSG00000159200 | 9.932183 | 0.385726  | 0.000216296 | 0.006885655 |

|           |   |    |                              |                 |          |           |             |             |
|-----------|---|----|------------------------------|-----------------|----------|-----------|-------------|-------------|
| RUBCN     |   | 3  | complement(197668867..197749 | ENSG00000145016 | 4.495572 | 0.384729  | 0.000222579 | 0.007070263 |
| NBPF12    |   | 1  | 146938744..146996202         | ENSG00000268043 | 3.225181 | -0.325376 | 0.000225639 | 0.007138761 |
| SIRPB1    |   | 20 | complement(1561385..1620061) | ENSG00000101307 | 7.561586 | -0.301086 | 0.000225712 | 0.007138761 |
| ALPK1     |   | 4  | 112285509..112442621         | ENSG00000073331 | 4.758158 | 0.319102  | 0.000232696 | 0.007332994 |
| EPOP      |   | 17 | complement(38671703..3867495 | ENSG00000273604 | 1.487654 | 0.777663  | 0.000232857 | 0.007332994 |
| EXOC3L1   |   | 16 | complement(67184379..6719018 | ENSG00000179044 | 0.35275  | 1.421925  | 0.00023547  | 0.007399329 |
| CYBB      | X |    | 37780059..37813461           | ENSG00000165168 | 336.9395 | 0.508574  | 0.000238251 | 0.007470636 |
| DEF6      |   | 6  | 35297818..35321771           | ENSG00000023892 | 3.198578 | -0.61183  | 0.000240739 | 0.007500367 |
| IL10RA    |   | 11 | 117986370..118003037         | ENSG00000110324 | 37.75537 | 0.481835  | 0.000240154 | 0.007500367 |
| HS3ST2    |   | 16 | 22814162..22916338           | ENSG00000122254 | 1.360437 | -0.813595 | 0.000240597 | 0.007500367 |
| DST       |   | 6  | complement(56457987..5695483 | ENSG00000151914 | 4.788516 | -0.436029 | 0.000244093 | 0.007573437 |
| GPD1      |   | 12 | 50103982..50111313           | ENSG00000167588 | 112.3401 | -0.492917 | 0.00024412  | 0.007573437 |
| HCAR3     |   | 12 | complement(122714756..122716 | ENSG00000255398 | 22.53703 | 0.614326  | 0.000244769 | 0.007577472 |
| PPM1K     |   | 4  | complement(88257620..8828476 | ENSG00000163644 | 1.644481 | 0.379274  | 0.000249266 | 0.007667949 |
| RASA4     |   | 7  | complement(102573807..102616 | ENSG00000105808 | 4.269231 | 0.447811  | 0.00024899  | 0.007667949 |
| ZNF503    |   | 10 | complement(75397830..7540176 | ENSG00000165655 | 1.492165 | -0.618247 | 0.000248466 | 0.007667949 |
| HCK       |   | 20 | 32052197..32101856           | ENSG00000101336 | 129.9833 | 0.569479  | 0.00025481  | 0.007822016 |
| PDCD4     |   | 10 | 110871795..110900006         | ENSG00000150593 | 20.18838 | -0.295757 | 0.000256102 | 0.007845194 |
| C1QTNF3-A |   | 5  | complement(33987174..3412452 | ENSG00000273294 | 0.148378 | 3.360253  | 0.00025818  | 0.007892306 |
| KCNJ5     |   | 11 | 128891356..128921163         | ENSG00000120457 | 1.209224 | -0.698776 | 0.000261285 | 0.007970546 |
| ID3       |   | 1  | complement(23557926..2355950 | ENSG00000117318 | 10.06554 | -0.564591 | 0.00026446  | 0.008050613 |
| TEX2      |   | 17 | complement(64147227..6426326 | ENSG00000136478 | 17.64386 | -0.321223 | 0.000265169 | 0.008055418 |
| MGAT4A    |   | 2  | complement(98619106..9873113 | ENSG00000071073 | 4.052757 | -0.308837 | 0.000266994 | 0.008060565 |
| HEBP2     |   | 6  | 138403531..138422197         | ENSG00000051620 | 2.28835  | -0.349659 | 0.000266174 | 0.008060565 |
| CLEC2D    |   | 12 | 9664969..9699553             | ENSG00000069493 | 1.624735 | 0.59184   | 0.00026668  | 0.008060565 |
| VWA8      |   | 13 | complement(41566835..4196112 | ENSG00000102763 | 10.05426 | 0.371108  | 0.00027131  | 0.008164063 |
| MMP14     |   | 14 | 22836560..22849041           | ENSG00000157227 | 152.749  | 0.506957  | 0.000271539 | 0.008164063 |
| ARPIN     |   | 15 | complement(89895006..8991295 | ENSG00000242498 | 1.592317 | -0.352212 | 0.000275765 | 0.008274082 |
| CORO6     |   | 17 | complement(29614756..2962291 | ENSG00000167549 | 1.616611 | -0.676793 | 0.00027849  | 0.008338725 |
| NFIX      |   | 19 | 12995475..13098796           | ENSG00000008441 | 0.872156 | 0.634546  | 0.000281392 | 0.008408395 |
| PPAN-P2RY |   | 19 | 10106223..10114780           | ENSG00000243207 | 0.503408 | -3.163675 | 0.000284731 | 0.008490799 |
| ENDOD1    |   | 11 | 95089846..95132645           | ENSG00000149218 | 3.416616 | 0.385678  | 0.000286672 | 0.008523817 |
| GOLGA6D   |   | 15 | 75282835..75295807           | ENSG00000140478 | 0.155743 | 3.476377  | 0.000287005 | 0.008523817 |
| ADPRS     |   | 1  | 36088892..36093932           | ENSG00000116863 | 28.0084  | 0.391307  | 0.000291045 | 0.008626264 |
| UNC93B1   |   | 11 | complement(67991100..6800498 | ENSG00000110057 | 63.26628 | 0.435597  | 0.000294625 | 0.00871469  |
| URGCP-MR  |   | 7  | complement(43866558..4390658 | ENSG00000270617 | 0.517544 | -4.207844 | 0.000301729 | 0.008906788 |
| PLAAT4    |   | 11 | 63536808..63546462           | ENSG00000133321 | 4.321395 | 0.951572  | 0.000305779 | 0.009008147 |
| CLEC7A    |   | 12 | complement(10116777..1013025 | ENSG00000172243 | 11.59702 | 0.34727   | 0.000309684 | 0.00910484  |
| RASA4B    |   | 7  | complement(102479976..102517 | ENSG00000170667 | 2.7632   | 0.605028  | 0.000315745 | 0.00926439  |
| NFKB2     |   | 10 | 102394110..102402524         | ENSG00000077150 | 30.8346  | 0.500891  | 0.000321149 | 0.009404071 |
| CD1D      |   | 1  | 158178030..158186427         | ENSG00000158473 | 0.583649 | -0.966735 | 0.000324848 | 0.009488373 |
| gene:ENSG |   | 7  | 66087761..66152277           | ENSG00000249319 | 1.912131 | -1.429507 | 0.000325327 | 0.009488373 |
| VILL      |   | 3  | 37988059..38007188           | ENSG00000136059 | 1.669641 | 0.660152  | 0.000327841 | 0.009542652 |
| LIMK2     |   | 22 | 31212239..31280080           | ENSG00000182541 | 10.29718 | 0.458366  | 0.000331491 | 0.009629704 |
| SASH3     | X |    | 129779949..129795201         | ENSG00000122122 | 42.29735 | -0.306233 | 0.000342646 | 0.009934011 |
| EVI5      |   | 1  | complement(92508696..9279240 | ENSG00000067208 | 3.009692 | -0.377749 | 0.000346131 | 0.010015175 |
| ZYG11B    |   | 1  | 52726453..52827336           | ENSG00000162378 | 2.981452 | -0.365656 | 0.000352167 | 0.01016968  |
| NPL       |   | 1  | 182789293..182830384         | ENSG00000135838 | 35.85177 | -0.325026 | 0.000354197 | 0.010200482 |
| PCYOX1    |   | 2  | 70257386..70281185           | ENSG00000116005 | 4.164826 | -0.367861 | 0.000354629 | 0.010200482 |
| TBC1D8    |   | 2  | complement(101007228..101252 | ENSG00000204634 | 12.53248 | -0.294093 | 0.000356939 | 0.010246738 |
| CLMN      |   | 14 | complement(95181940..9531990 | ENSG00000165959 | 2.053417 | -0.314377 | 0.00035926  | 0.010293144 |
| CD69      |   | 12 | complement(9752486..9760901) | ENSG00000110848 | 0.863619 | 1.130194  | 0.000364542 | 0.010424053 |
| MAML3     |   | 4  | complement(139716753..140154 | ENSG00000196782 | 0.367038 | -0.881802 | 0.000372281 | 0.010624557 |
| TNIP3     |   | 4  | complement(121131408..121227 | ENSG00000050730 | 15.16562 | 0.927491  | 0.000374021 | 0.010653396 |
| NECTIN2   |   | 19 | 44846175..44889223           | ENSG00000130202 | 21.09777 | 0.395597  | 0.000375703 | 0.010680479 |
| IMPDH1    |   | 7  | complement(128392277..128410 | ENSG00000106348 | 30.60343 | -0.326738 | 0.00037732  | 0.010705641 |
| TLCD4     |   | 1  | 95117355..95197607           | ENSG00000152078 | 0.180969 | -1.306822 | 0.000379964 | 0.010759767 |
| SOD2      |   | 6  | complement(159669069..159762 | ENSG00000112096 | 111.9229 | 0.803627  | 0.00038492  | 0.010879007 |

|           |    |                              |                 |          |           |             |             |
|-----------|----|------------------------------|-----------------|----------|-----------|-------------|-------------|
| CLSTN3    | 12 | 7129698..7158945             | ENSG00000139182 | 0.710723 | 0.752815  | 0.00039662  | 0.011188054 |
| WDR91     | 7  | complement(135183839..135211 | ENSG00000105875 | 3.772198 | -0.367599 | 0.000403922 | 0.011372091 |
| GCNT4     | 5  | complement(75025346..7505255 | ENSG00000176928 | 0.479832 | 0.842445  | 0.000405383 | 0.011391261 |
| OAT       | 10 | complement(124397303..124418 | ENSG00000065154 | 12.70423 | -0.306062 | 0.000417665 | 0.011691417 |
| N4BP1     | 16 | complement(48538726..4862014 | ENSG00000102921 | 8.257987 | 0.33192   | 0.000416942 | 0.011691417 |
| PBXIP1    | 1  | complement(154944076..154956 | ENSG00000163346 | 11.21501 | -0.352212 | 0.000419515 | 0.011720764 |
| MYO1G     | 7  | complement(44962662..4497908 | ENSG00000136286 | 19.0938  | 0.416218  | 0.000420469 | 0.011724987 |
| MYOF      | 10 | complement(93306429..9348233 | ENSG00000138119 | 76.75592 | 0.447303  | 0.000426598 | 0.011873232 |
| TMEM273   | 10 | complement(49154725..4918858 | ENSG00000204161 | 6.150409 | 0.372485  | 0.000429317 | 0.01192621  |
| JPH4      | 14 | complement(23568035..2357879 | ENSG00000092051 | 0.701959 | -0.841989 | 0.0004304   | 0.011933588 |
| TRHDE     | 12 | 72087266..72670758           | ENSG00000072657 | 1.620537 | -0.446558 | 0.0004422   | 0.012237562 |
| OAS1      | 12 | 112905856..112933219         | ENSG00000089127 | 44.71843 | 0.486078  | 0.000443648 | 0.012254419 |
| APLN      | X  | complement(129645259..129654 | ENSG00000171388 | 0.531562 | -1.347769 | 0.000446211 | 0.012301957 |
| SLC47A1   | 17 | 19495385..19579034           | ENSG00000142494 | 13.48201 | -0.460488 | 0.00045032  | 0.012391855 |
| ADAR      | 1  | complement(154581695..154628 | ENSG00000160710 | 32.88446 | 0.461986  | 0.000457161 | 0.012556473 |
| CD101     | 1  | 117001750..117036552         | ENSG00000134256 | 10.49891 | -0.302811 | 0.000459479 | 0.012596451 |
| BMF       | 15 | complement(40087890..4010889 | ENSG00000104081 | 1.862887 | -0.501368 | 0.000469032 | 0.012834272 |
| DDX60L    | 4  | complement(168356735..168537 | ENSG00000181381 | 24.81859 | 0.542805  | 0.000471049 | 0.012865364 |
| IL17RB    | 3  | 53846568..53865794           | ENSG00000056736 | 2.886238 | -0.593609 | 0.000480974 | 0.013111914 |
| EFNB1     | X  | 68829021..68842160           | ENSG00000090776 | 5.297804 | -0.353898 | 0.000483455 | 0.013155007 |
| PDGFRL    | 8  | 17576433..17644071           | ENSG00000104213 | 0.264214 | 2.859589  | 0.000487764 | 0.013200585 |
| SLC25A22  | 11 | complement(790475..798281)   | ENSG00000177542 | 2.947381 | 0.439224  | 0.000486702 | 0.013200585 |
| CENPN     | 16 | 81006552..81033114           | ENSG00000166451 | 2.390106 | 0.331985  | 0.00048784  | 0.013200585 |
| CXCL5     | 4  | complement(73995642..7399867 | ENSG00000163735 | 1497.721 | 0.582813  | 0.000490456 | 0.013246857 |
| FAM214A   | 15 | complement(52581317..5270981 | ENSG00000047346 | 1.557534 | -0.370398 | 0.000494644 | 0.013310744 |
| AOC3      | 17 | 42851184..42858130           | ENSG00000131471 | 22.62057 | -0.284806 | 0.000493812 | 0.013310744 |
| PRSS23    | 11 | 86791059..86952910           | ENSG00000150687 | 1.070456 | -0.505391 | 0.000497283 | 0.013357169 |
| MYC       | 8  | 127735434..127742951         | ENSG00000136997 | 2.649289 | 0.343211  | 0.000502986 | 0.013485569 |
| AIMP2     | 7  | 6009255..6023834             | ENSG00000106305 | 7.067287 | 0.332353  | 0.000505794 | 0.013536014 |
| P2RY6     | 11 | 73264498..73305103           | ENSG00000171631 | 0.388379 | 0.709101  | 0.000519757 | 0.013877119 |
| TSFM      | 12 | 57782761..57808071           | ENSG00000123297 | 7.476726 | 0.363663  | 0.000520439 | 0.013877119 |
| TLE3      | 15 | complement(70047790..7009817 | ENSG00000140332 | 8.307086 | -0.330739 | 0.000525924 | 0.013997804 |
| PSME1     | 14 | 24136163..24138967           | ENSG00000092010 | 107.7307 | 0.382188  | 0.000537764 | 0.014286919 |
| SHMT1     | 17 | complement(18327860..1836356 | ENSG00000176974 | 1.094281 | -0.7189   | 0.000539214 | 0.014299445 |
| LAMC1     | 1  | 183023420..183145592         | ENSG00000135862 | 4.626202 | -0.292043 | 0.000555563 | 0.014706306 |
| TMIGD3    | 1  | complement(111483348..111563 | ENSG00000121933 | 1.633449 | -0.857387 | 0.000557818 | 0.014739319 |
| CERK      | 22 | complement(46684410..4673825 | ENSG00000100422 | 6.604007 | -0.296691 | 0.000562112 | 0.014825957 |
| SOCS3     | 17 | complement(78356778..7836007 | ENSG00000184557 | 18.25027 | 0.698501  | 0.000570579 | 0.015022151 |
| SPIRE1    | 18 | complement(12446512..1265813 | ENSG00000134278 | 9.389555 | -0.281826 | 0.000574105 | 0.015060729 |
| PROCR     | 20 | 35172072..35216240           | ENSG00000101000 | 20.78869 | 0.293153  | 0.000573948 | 0.015060729 |
| ITK       | 5  | 157142933..157255185         | ENSG00000113263 | 0.514711 | 1.042171  | 0.000582443 | 0.015252079 |
| SHISA5    | 3  | complement(48467798..4850482 | ENSG00000164054 | 36.51189 | 0.392007  | 0.000593061 | 0.015502342 |
| FOXO1     | 13 | complement(40555667..4066664 | ENSG00000150907 | 1.514945 | -0.449539 | 0.000595728 | 0.015544234 |
| PLEK      | 2  | 68365282..68397453           | ENSG00000115956 | 197.6982 | 0.446896  | 0.000597294 | 0.015557314 |
| ADORA1    | 1  | 203090654..203167405         | ENSG00000163485 | 0.666766 | -1.041694 | 0.00059855  | 0.015562299 |
| AMOTL1    | 11 | 94706431..94876748           | ENSG00000166025 | 3.302714 | -0.293233 | 0.000602905 | 0.015647677 |
| gene:ENSG | 6  | 116399395..116463696         | ENSG00000285446 | 0.590914 | -3.108887 | 0.000609239 | 0.015784039 |
| ADGRE3    | 19 | complement(14619117..1469002 | ENSG00000131355 | 10.69688 | 0.449919  | 0.000617069 | 0.015958603 |
| SWAP70    | 11 | 9664077..9752993             | ENSG00000133789 | 12.72946 | -0.276831 | 0.000634987 | 0.016392993 |
| gene:ENSG | 9  | complement(32455323..3255260 | ENSG00000288684 | 0.522711 | -2.127487 | 0.000642999 | 0.016570559 |
| TMEM171   | 5  | 73120569..73131809           | ENSG00000157111 | 1.015402 | 1.296777  | 0.000663014 | 0.017029393 |
| PARP11    | 12 | complement(3791047..3873448) | ENSG00000111224 | 1.273022 | 0.475086  | 0.000663135 | 0.017029393 |
| SORD      | 15 | 45023147..45077185           | ENSG00000140263 | 2.721994 | -0.309943 | 0.000685897 | 0.017583027 |
| FKBP5     | 6  | complement(35573585..3572858 | ENSG00000096060 | 11.15084 | 0.423378  | 0.000688136 | 0.017609526 |
| MFSD6     | 2  | 190408355..190509205         | ENSG00000151690 | 9.479574 | -0.279577 | 0.00069085  | 0.017648087 |
| AGTRAP    | 1  | 11736084..11754802           | ENSG00000177674 | 43.21952 | 0.336778  | 0.000700864 | 0.017872641 |
| SRI       | 7  | complement(88205115..8822699 | ENSG00000075142 | 23.59843 | 0.273492  | 0.000712725 | 0.018115716 |
| LPL       | 8  | 19901717..19967259           | ENSG00000175445 | 167.8692 | 0.459284  | 0.000712875 | 0.018115716 |

|           |    |                               |                 |          |           |             |             |
|-----------|----|-------------------------------|-----------------|----------|-----------|-------------|-------------|
| FAM222B   | 17 | complement(28755980..2885523) | ENSG00000173065 | 2.812533 | -0.314686 | 0.000717014 | 0.01818926  |
| HIC1      | 17 | 2054154..2063241              | ENSG00000177374 | 0.650354 | 0.593486  | 0.000722303 | 0.018291662 |
| AK4       | 1  | 65147549..65232145            | ENSG00000162433 | 2.167173 | 0.529915  | 0.000729894 | 0.018451911 |
| PLEKHG3   | 14 | 64704102..64750249            | ENSG00000126822 | 1.447187 | 0.427046  | 0.000745113 | 0.018804132 |
| MOSPD1    | X  | complement(134887632..134915) | ENSG00000101928 | 15.54449 | -0.283783 | 0.000752552 | 0.018959129 |
| KLHDC7B   | 22 | 50545899..50551023            | ENSG00000130487 | 0.330275 | 0.925171  | 0.000759064 | 0.019090273 |
| TNIP1     | 5  | complement(151029945..151093) | ENSG00000145901 | 84.28743 | 0.552008  | 0.000763386 | 0.019119414 |
| TMEM86A   | 11 | 18693122..18704785            | ENSG00000151117 | 4.745363 | -0.345543 | 0.000765457 | 0.019119414 |
| MMP9      | 20 | 46008908..46016561            | ENSG00000100985 | 103.2079 | 0.50115   | 0.000765182 | 0.019119414 |
| RTN4R     | 22 | complement(20241415..2028324) | ENSG00000040608 | 2.411103 | -0.581083 | 0.000762294 | 0.019119414 |
| PHF11     | 13 | 49495610..49528981            | ENSG00000136147 | 14.20771 | 0.379098  | 0.000778647 | 0.0193826   |
| APOC4-APC | 19 | 44942238..44949565            | ENSG00000224916 | 1.020661 | -0.999977 | 0.000778255 | 0.0193826   |
| MTHFD2    | 2  | 74186172..74217565            | ENSG00000065911 | 26.80416 | 0.453922  | 0.000795138 | 0.019759444 |
| FAS       | 10 | 88990531..89017059            | ENSG00000026103 | 2.068874 | 0.485434  | 0.000805802 | 0.019990467 |
| CD180     | 5  | complement(67179613..6719679) | ENSG00000134061 | 2.402473 | -0.4522   | 0.000812983 | 0.020134419 |
| LYRM1     | 16 | 20899868..20925006            | ENSG00000102897 | 3.838975 | 0.321712  | 0.000817076 | 0.020201536 |
| UGDH      | 4  | complement(39498755..3952831) | ENSG00000109814 | 4.778788 | 0.302923  | 0.000826601 | 0.020399362 |
| HIRA      | 22 | complement(19330698..1944745) | ENSG00000100084 | 6.420143 | 0.401891  | 0.000827869 | 0.020399362 |
| FOXO3     | 6  | 108559835..108684774          | ENSG00000118689 | 4.980713 | -0.281349 | 0.00083082  | 0.020437608 |
| CYTIP     | 2  | complement(157414619..157488) | ENSG00000115165 | 20.69783 | -0.348138 | 0.000834709 | 0.020498781 |
| ABHD5     | 3  | 43690108..43734371            | ENSG00000011198 | 9.966569 | -0.270502 | 0.000840176 | 0.020598401 |
| IL18BP    | 11 | 71998613..72005715            | ENSG00000137496 | 6.083008 | 0.477879  | 0.000853665 | 0.020894048 |
| ADRB2     | 5  | 148826611..148828623          | ENSG00000169252 | 0.785602 | -1.002313 | 0.000862067 | 0.02106442  |
| ITSN1     | 21 | 33642400..33899861            | ENSG00000205726 | 0.834499 | -0.398751 | 0.000869774 | 0.021217255 |
| DENND3    | 8  | 141117278..141195808          | ENSG00000105339 | 1.776392 | 0.467897  | 0.000891304 | 0.021706227 |
| LTV1      | 6  | 143843338..143863812          | ENSG00000135521 | 30.10185 | 0.368732  | 0.000894998 | 0.02175992  |
| HAMP      | 19 | 35280716..35285143            | ENSG00000105697 | 0.934644 | -1.747479 | 0.00091709  | 0.022260003 |
| DDIAS     | 11 | 82899975..82958277            | ENSG00000165490 | 1.063836 | -0.666425 | 0.000919146 | 0.022272897 |
| CKAP4     | 12 | complement(106237881..106304) | ENSG00000136026 | 13.81818 | 0.305806  | 0.00094554  | 0.022874561 |
| ICOSLG    | 21 | complement(44217014..4424096) | ENSG00000160223 | 2.326783 | 0.388052  | 0.000951344 | 0.022976913 |
| CCL4L2    | 17 | 36210924..36212878            | ENSG00000276070 | 126.6488 | 1.371092  | 0.000957481 | 0.023048955 |
| DOCK11    | X  | 118495815..118686163          | ENSG00000147251 | 26.51048 | -0.375709 | 0.000956509 | 0.023048955 |
| TCF4      | 18 | complement(55222185..5566478) | ENSG00000196628 | 0.303314 | 0.589132  | 0.000970262 | 0.023318201 |
| NIBAN2    | 9  | complement(127505339..127578) | ENSG00000136830 | 80.34945 | 0.412625  | 0.000973185 | 0.023350043 |
| KYNU      | 2  | 142877657..143055833          | ENSG00000115919 | 29.48825 | 0.543686  | 0.000978207 | 0.023369039 |
| DPYSL3    | 5  | complement(147390808..147510) | ENSG00000113657 | 40.33937 | 0.493141  | 0.000979155 | 0.023369039 |
| ASRGL1    | 11 | 62337448..62393412            | ENSG00000162174 | 2.362401 | -0.509633 | 0.000979115 | 0.023369039 |
| ABCA7     | 19 | 1039997..1065572              | ENSG00000064687 | 3.635097 | -0.391972 | 0.000980374 | 0.023369039 |
| BIRC3     | 11 | 102317450..102339403          | ENSG00000023445 | 5.293678 | 0.484599  | 0.000983142 | 0.023396863 |
| SLC9A1    | 1  | complement(27098809..2716698) | ENSG00000090020 | 12.45537 | -0.267724 | 0.000997389 | 0.023658836 |
| NDUFV2    | 18 | 9102630..9134345              | ENSG00000178127 | 39.10888 | 0.284881  | 0.000997127 | 0.023658836 |
| SLC37A1   | 21 | 42496008..42581440            | ENSG00000160190 | 9.991521 | 0.356916  | 0.001001223 | 0.023711296 |
| TNFRSF6B  | 20 | 63696652..63698684            | ENSG00000243509 | 0.315485 | 3.1939    | 0.001002997 | 0.023714865 |
| PRKCH     | 14 | 61187559..61550976            | ENSG00000027075 | 10.68083 | -0.268984 | 0.001030208 | 0.024318902 |
| SLC40A1   | 2  | complement(189560590..189583) | ENSG00000138449 | 0.069149 | -2.782256 | 0.001036677 | 0.02443214  |
| LCP2      | 5  | complement(170246233..170297) | ENSG00000043462 | 26.02602 | 0.352997  | 0.001045122 | 0.024591492 |
| gene:ENSG | 21 | 5022493..5040666              | ENSG00000277117 | 2.611642 | 0.566798  | 0.001059138 | 0.024881229 |
| gene:ENSG | 3  | complement(155763043..155854) | ENSG00000284952 | 0.133394 | 6.464297  | 0.00106624  | 0.025007872 |
| DEFB1     | 8  | complement(6870592..6877936)  | ENSG00000164825 | 22.33179 | 0.44387   | 0.001071207 | 0.025084107 |
| SNRPG     | 2  | complement(70281362..7029374) | ENSG00000143977 | 40.47547 | 0.266391  | 0.001077096 | 0.025181634 |
| FAM162A   | 3  | 122384176..122412334          | ENSG00000114023 | 8.399694 | -0.278815 | 0.001084817 | 0.02532163  |
| PLEKHN1   | 1  | 966482..975865                | ENSG00000187583 | 0.53779  | 0.820374  | 0.001088631 | 0.025370129 |
| SERF1B    | 5  | 70025247..70043113            | ENSG00000205572 | 0.973956 | 0.999183  | 0.001095932 | 0.025499616 |
| MATK      | 19 | complement(3777970..3802129)  | ENSG00000007264 | 27.43386 | 0.330134  | 0.001105876 | 0.025690087 |
| TNFAIP6   | 2  | 151357592..151380046          | ENSG00000123610 | 108.6915 | 1.270939  | 0.001126392 | 0.02612515  |
| RPS10-NUC | 6  | complement(34284887..3442607) | ENSG00000270800 | 6.587681 | 0.275299  | 0.001138015 | 0.026352885 |
| TNFSF13   | 17 | 7558292..7561608              | ENSG00000161955 | 36.59494 | 0.350902  | 0.001157488 | 0.026761425 |
| CRTAP     | 3  | 33114014..33147773            | ENSG00000170275 | 13.47975 | -0.260699 | 0.001171521 | 0.027043071 |

|          |    |                              |                 |          |           |             |             |
|----------|----|------------------------------|-----------------|----------|-----------|-------------|-------------|
| AGRP     | 16 | complement(67482571..6748354 | ENSG00000159723 | 10.63868 | -0.774828 | 0.00120024  | 0.027662305 |
| STARD4   | 5  | complement(111496033..111512 | ENSG00000164211 | 4.817127 | 0.324133  | 0.001203547 | 0.02769485  |
| CCL17    | 16 | 57404767..57416063           | ENSG00000102970 | 2.32087  | 1.413277  | 0.001213628 | 0.027882907 |
| RNF168   | 3  | complement(196468783..196503 | ENSG00000163961 | 4.485978 | -0.327424 | 0.001226932 | 0.028056237 |
| SH3PXD2B | 5  | complement(172325000..172454 | ENSG00000174705 | 6.759357 | 0.438275  | 0.001225966 | 0.028056237 |
| CASP7    | 10 | 113679162..113730907         | ENSG00000165806 | 19.11854 | 0.263282  | 0.001225862 | 0.028056237 |
| FOSL1    | 11 | complement(65892049..6590057 | ENSG00000175592 | 6.310002 | 0.376366  | 0.001231407 | 0.028114554 |
| CASS4    | 20 | 56412112..56460387           | ENSG00000087589 | 0.867618 | 0.618102  | 0.00125033  | 0.028502064 |
| SLC19A2  | 1  | complement(169463909..169485 | ENSG00000117479 | 4.703116 | -0.295926 | 0.001256637 | 0.028601215 |
| MPHOSPH6 | 16 | complement(82147798..8217022 | ENSG00000135698 | 23.97078 | 0.27017   | 0.001268651 | 0.028829754 |
| DNASE2   | 19 | complement(12875209..1288146 | ENSG00000105612 | 75.24249 | -0.392882 | 0.001273611 | 0.028897532 |
| SNX18    | 5  | 54517759..54546586           | ENSG00000178996 | 4.915585 | -0.274253 | 0.001279716 | 0.02899103  |
| SIGLEC7  | 19 | 51142299..51153526           | ENSG00000168995 | 14.55376 | -0.284868 | 0.001288353 | 0.029141504 |
| LDLRAD3  | 11 | 35943981..36232136           | ENSG00000179241 | 1.708717 | -0.476797 | 0.001290559 | 0.029146297 |
| CDCA7L   | 7  | complement(21900899..2194590 | ENSG00000164649 | 3.568519 | -0.31397  | 0.001292879 | 0.029153627 |
| CNIH4    | 1  | 224356858..224379459         | ENSG00000143771 | 16.22714 | 0.260572  | 0.001309492 | 0.029482742 |
| TAPBP    | 6  | complement(33299694..3331438 | ENSG00000231925 | 41.29662 | 0.396163  | 0.001318413 | 0.029637923 |
| TFCP2L1  | 2  | complement(121216587..121285 | ENSG00000115112 | 1.955239 | -0.336726 | 0.001340458 | 0.030087202 |
| PER3     | 1  | 7784291..7845177             | ENSG00000049246 | 2.248482 | -0.370407 | 0.001353717 | 0.030338211 |
| SEMA4A   | 1  | 156147366..156177752         | ENSG00000196189 | 3.634467 | 0.558667  | 0.00138119  | 0.030859255 |
| MGAT3    | 22 | 39457012..39492194           | ENSG00000128268 | 17.44252 | 0.324205  | 0.001380843 | 0.030859255 |
| MFS2A    | 1  | 39955112..39969968           | ENSG00000168389 | 22.82524 | 0.429691  | 0.001424129 | 0.031673323 |
| SAPCD1   | 6  | 31762996..31764851           | ENSG00000228727 | 0.252049 | 4.038613  | 0.001423801 | 0.031673323 |
| MSC      | 8  | complement(71841560..7184441 | ENSG00000178860 | 39.33078 | 0.333129  | 0.001419858 | 0.031673323 |
| LRRC32   | 11 | complement(76657524..7667074 | ENSG00000137507 | 0.586555 | 0.904996  | 0.001436927 | 0.031812689 |
| CCL1     | 17 | complement(34360328..3436323 | ENSG00000108702 | 5.162197 | 1.238961  | 0.001435937 | 0.031812689 |
| PDCD5    | 19 | 32581190..32587453           | ENSG00000105185 | 19.5411  | 0.266308  | 0.001432753 | 0.031812689 |
| HERC1    | 15 | complement(63608618..6383394 | ENSG00000103657 | 5.151693 | -0.255954 | 0.001456871 | 0.032205455 |
| RBP7     | 1  | 9997206..10016021            | ENSG00000162444 | 4.021857 | -0.743423 | 0.001462463 | 0.032280226 |
| TXN      | 9  | complement(110243810..110256 | ENSG00000136810 | 1387.004 | 0.385026  | 0.001467669 | 0.032346268 |
| MCTP1    | 5  | complement(94703741..9528457 | ENSG00000175471 | 3.369031 | 0.418125  | 0.001477791 | 0.032520297 |
| INTS9    | 8  | complement(28767661..2889024 | ENSG00000104299 | 5.192398 | 0.291495  | 0.001482699 | 0.032530333 |
| TNFSF14  | 19 | complement(6661253..6670588) | ENSG00000125735 | 11.61223 | 0.264463  | 0.001481493 | 0.032530333 |
| DPYD     | 1  | complement(97077743..9799500 | ENSG00000188641 | 7.866444 | 0.358035  | 0.001514181 | 0.033171244 |
| GPRIN3   | 4  | complement(89236383..8930780 | ENSG00000185477 | 15.92502 | -0.400402 | 0.001540143 | 0.033689481 |
| BTG2     | 1  | 203305491..203309602         | ENSG00000159388 | 34.04132 | 0.284739  | 0.001548969 | 0.033781388 |
| PVALB    | 22 | complement(36800684..3681947 | ENSG00000100362 | 3.506054 | -0.763857 | 0.001547869 | 0.033781388 |
| CAT      | 11 | 34438934..34472060           | ENSG00000121691 | 60.5272  | -0.36221  | 0.001552594 | 0.033809997 |
| AACS     | 12 | 125065434..125143333         | ENSG00000081760 | 2.096577 | 0.427452  | 0.001559148 | 0.033902188 |
| RIPOR2   | 6  | complement(24804282..2504217 | ENSG00000111913 | 0.260515 | 0.790459  | 0.001570531 | 0.034098967 |
| BLVRB    | 19 | complement(40447765..4046576 | ENSG00000090013 | 66.78657 | -0.348418 | 0.001573413 | 0.034110842 |
| RTCB     | 22 | complement(32387582..3241224 | ENSG00000100220 | 59.11052 | 0.368342  | 0.001588931 | 0.034396237 |
| NRROS    | 3  | 196639694..196662004         | ENSG00000174004 | 34.47052 | 0.357132  | 0.001606669 | 0.034675214 |
| DRAM1    | 12 | 101877580..102012130         | ENSG00000136048 | 48.05766 | 0.371014  | 0.001608938 | 0.034675214 |
| TSHZ1    | 18 | 75210755..75289950           | ENSG00000179981 | 2.198237 | -0.300946 | 0.001604762 | 0.034675214 |
| CEACAM3  | 19 | 41796587..41811554           | ENSG00000170956 | 0.541425 | -1.328058 | 0.001616114 | 0.034778584 |
| EIF4EBP1 | 8  | 38030534..38060365           | ENSG00000187840 | 31.89234 | -0.276218 | 0.001620389 | 0.034819295 |
| CCL22    | 16 | 57358783..57366189           | ENSG00000102962 | 30.75206 | 0.530114  | 0.001666573 | 0.035759133 |
| SGSH     | 17 | complement(80206716..8022092 | ENSG00000181523 | 10.73697 | -0.293997 | 0.001683252 | 0.036064034 |
| DDIT4    | 10 | 72273919..72276036           | ENSG00000168209 | 18.25204 | -0.816471 | 0.001691063 | 0.036178349 |
| OLFML2B  | 1  | complement(161983192..162023 | ENSG00000162745 | 4.937931 | -0.344389 | 0.001697194 | 0.036256441 |
| TOB1     | 17 | complement(50862223..5086797 | ENSG00000141232 | 9.794931 | -0.358247 | 0.001716463 | 0.036614547 |
| FADS1    | 11 | complement(61799627..6182931 | ENSG00000149485 | 1.891811 | -0.286302 | 0.00172268  | 0.036693577 |
| CHST14   | 15 | 40470984..40473158           | ENSG00000169105 | 2.636815 | -0.499582 | 0.001725604 | 0.036702364 |
| SMIM30   | 7  | complement(113116718..113118 | ENSG00000214194 | 36.62713 | 0.261067  | 0.001770207 | 0.037596322 |
| DNAAF4   | 15 | complement(55410525..5550823 | ENSG00000256061 | 2.605151 | -0.469724 | 0.001783727 | 0.037828471 |
| PSMA4    | 15 | 78540405..78552417           | ENSG00000041357 | 36.69975 | 0.358801  | 0.001800852 | 0.03813631  |
| OR2I1P   | 6  | 29550407..29557721           | ENSG00000237988 | 0.046957 | 2.568206  | 0.001820455 | 0.038495648 |

|           |    |                               |                 |          |           |             |             |
|-----------|----|-------------------------------|-----------------|----------|-----------|-------------|-------------|
| DOT1L     | 19 | 2163933..2232578              | ENSG00000104885 | 10.34483 | 0.249605  | 0.001825475 | 0.038546011 |
| STARD5    | 15 | complement(81309053..8132418) | ENSG00000172345 | 2.308316 | -0.343531 | 0.001840185 | 0.038800549 |
| PLEKHB1   | 11 | 73646178..73662819            | ENSG00000021300 | 0.441456 | -0.860661 | 0.001847979 | 0.038908741 |
| SNRPA     | 19 | 40750637..40765389            | ENSG00000077312 | 17.28108 | 0.269237  | 0.001853177 | 0.038962048 |
| AMT       | 3  | complement(49416778..4942268) | ENSG00000145020 | 0.170646 | 1.820208  | 0.001872083 | 0.039302985 |
| GZF1      | 20 | 23362182..23373062            | ENSG00000125812 | 2.746933 | -0.363281 | 0.001878267 | 0.039376242 |
| FES       | 15 | 90883695..90895776            | ENSG00000182511 | 5.969065 | -0.285052 | 0.001883311 | 0.039425423 |
| MAGOHB    | 12 | complement(10604193..1061360) | ENSG00000111196 | 3.546402 | 0.302626  | 0.001890878 | 0.039527204 |
| ATP6VOD2  | 8  | 85987323..86154225            | ENSG00000147614 | 41.01259 | -0.323327 | 0.001899432 | 0.039649278 |
| SMYD2     | 1  | 214281102..214337131          | ENSG00000143499 | 10.16976 | 0.281207  | 0.001932792 | 0.04023071  |
| CRIM1     | 2  | 36355778..36551135            | ENSG00000150938 | 8.178665 | 0.462663  | 0.001932322 | 0.04023071  |
| C20orf27  | 20 | complement(3753508..3767781)  | ENSG00000101220 | 16.79781 | -0.30846  | 0.001942073 | 0.040366397 |
| SIK1      | 21 | complement(43414483..4342713) | ENSG00000142178 | 0.21936  | 2.242013  | 0.001959553 | 0.040671856 |
| RPS6KA2   | 6  | complement(166409364..166906) | ENSG00000071242 | 5.861015 | -0.372143 | 0.001969729 | 0.040825071 |
| GPR183    | 13 | complement(99294539..9930739) | ENSG00000169508 | 11.93095 | -0.461386 | 0.001992012 | 0.041228448 |
| ABHD15    | 17 | complement(29560547..2956703) | ENSG00000168792 | 6.886084 | -0.28919  | 0.002016855 | 0.04168358  |
| STAB1     | 3  | 52495338..52524495            | ENSG0000010327  | 3.32369  | -0.394278 | 0.002027758 | 0.041849719 |
| ZNF618    | 9  | 113876282..114056591          | ENSG00000157657 | 0.289978 | 0.734011  | 0.002039785 | 0.042038564 |
| CPE       | 4  | 165361194..165498547          | ENSG00000109472 | 18.2538  | -0.272812 | 0.002049053 | 0.042142358 |
| TPK1      | 7  | complement(144451941..144836) | ENSG00000196511 | 4.304725 | 0.353606  | 0.00205059  | 0.042142358 |
| GK        | X  | 30653359..30731462            | ENSG00000198814 | 28.6     | 0.376832  | 0.002064543 | 0.042369532 |
| PFKFB2    | 1  | 207034366..207081024          | ENSG00000123836 | 1.309931 | -0.349284 | 0.002069211 | 0.042405759 |
| CBX7      | 22 | complement(39120167..3915268) | ENSG00000100307 | 2.623675 | -0.46244  | 0.002078592 | 0.042478859 |
| ARHGFB6   | X  | complement(136665547..136780) | ENSG00000129675 | 5.236313 | -0.267119 | 0.002076873 | 0.042478859 |
| EXT1      | 8  | complement(117794490..118111) | ENSG00000182197 | 0.723899 | 0.470277  | 0.002083337 | 0.042516376 |
| SPTBN4    | 19 | 40466241..40576464            | ENSG00000160460 | 0.22633  | -0.832438 | 0.002118151 | 0.043166559 |
| ADORA2B   | 17 | 15945130..15975746            | ENSG00000170425 | 40.65199 | -0.289942 | 0.002128292 | 0.04331282  |
| GZMB      | 14 | complement(24630954..2463426) | ENSG00000100453 | 1.674189 | 0.824491  | 0.002136115 | 0.04341157  |
| EPHB2     | 1  | 22710839..22921500            | ENSG00000133216 | 1.199553 | 0.425396  | 0.002149411 | 0.043621104 |
| CD36      | 7  | 80369575..80679277            | ENSG00000135218 | 99.73293 | -0.365146 | 0.002164084 | 0.043797228 |
| TSPYL5    | 8  | complement(97273488..9727792) | ENSG00000180543 | 2.012212 | 0.423549  | 0.002161198 | 0.043797228 |
| PTPA      | 9  | 129110950..129148946          | ENSG00000119383 | 17.0187  | 0.245327  | 0.002170711 | 0.043870576 |
| NSMCE4A   | 10 | complement(121957091..121975) | ENSG00000107672 | 7.172746 | 0.293584  | 0.002191031 | 0.044220096 |
| ZNF697    | 1  | complement(119619377..119648) | ENSG00000143067 | 4.707384 | 0.334346  | 0.002196019 | 0.04425962  |
| PAQR8     | 6  | 52361421..52407777            | ENSG00000170915 | 2.237662 | -0.398672 | 0.002204627 | 0.044371907 |
| PPP2R5A   | 1  | 212285410..212361853          | ENSG00000066027 | 20.66034 | -0.247292 | 0.002212661 | 0.044472352 |
| NOP16     | 5  | complement(176383938..176388) | ENSG00000048162 | 10.11128 | 0.276224  | 0.002232133 | 0.044802093 |
| BPGM      | 7  | 134646811..134679816          | ENSG00000172331 | 5.406998 | 0.288151  | 0.002241397 | 0.044926326 |
| CXXC5     | 5  | 139647299..139683882          | ENSG00000171604 | 18.54452 | -0.247676 | 0.002257903 | 0.045167847 |
| CABLES1   | 18 | 23134564..23260470            | ENSG00000134508 | 3.294013 | -0.400829 | 0.002259629 | 0.045167847 |
| SPATA12   | 3  | 57060664..57075432            | ENSG00000186451 | 0.833727 | -0.928362 | 0.00226744  | 0.045200322 |
| AMIGO2    | 12 | complement(47075707..4707995) | ENSG00000139211 | 16.37125 | -0.248552 | 0.002266555 | 0.045200322 |
| MMAA      | 4  | 145599042..145660033          | ENSG00000151611 | 2.001577 | 0.301423  | 0.002291608 | 0.04549589  |
| BTN2A1    | 6  | 26457904..26476621            | ENSG00000112763 | 17.63508 | 0.247456  | 0.002291256 | 0.04549589  |
| DUSP16    | 12 | complement(12473282..1256286) | ENSG00000111266 | 1.632785 | -0.430588 | 0.002287352 | 0.04549589  |
| RASSF4    | 10 | 44959407..44995891            | ENSG00000107551 | 18.90916 | 0.361945  | 0.002297248 | 0.045545974 |
| MNDA      | 1  | 158831351..158849506          | ENSG00000163563 | 56.34384 | 0.322567  | 0.002331705 | 0.046166493 |
| FCER1A    | 1  | 159289714..159308224          | ENSG00000179639 | 0.215387 | -4.178692 | 0.002339938 | 0.046266806 |
| SUB1      | 5  | 32531633..32604079            | ENSG00000113387 | 16.20904 | 0.24538   | 0.002348638 | 0.046376074 |
| TP53INP1  | 8  | complement(94925972..9494937) | ENSG00000164938 | 1.270332 | -0.469072 | 0.002352759 | 0.046394758 |
| TIFAB     | 5  | complement(135444226..135452) | ENSG00000255833 | 0.604527 | 0.825583  | 0.002363162 | 0.046474466 |
| CBSL      | 21 | complement(6444869..6468040)  | ENSG00000274276 | 0.220665 | 3.584442  | 0.002361106 | 0.046474466 |
| PPARD     | 6  | 35342558..35428191            | ENSG00000112033 | 21.38555 | 0.329155  | 0.00237176  | 0.046580852 |
| PXN       | 12 | complement(120210439..120265) | ENSG00000089159 | 1.437681 | 0.433979  | 0.00238627  | 0.046802918 |
| TMEM179E  | 11 | 62787402..62790400            | ENSG00000185475 | 32.82265 | 0.253969  | 0.002401127 | 0.047031194 |
| ELOVL7    | 5  | complement(60751791..6084427) | ENSG00000164181 | 3.540288 | 0.672469  | 0.002405345 | 0.047050739 |
| gene:ENSG | 16 | complement(71447600..7148931) | ENSG00000261611 | 0.244005 | -1.058991 | 0.0024167   | 0.047209655 |
| SH2D3C    | 9  | complement(127738317..127778) | ENSG00000095370 | 1.776647 | -0.437111 | 0.002421744 | 0.04724503  |

|           |    |                              |                 |          |           |             |             |
|-----------|----|------------------------------|-----------------|----------|-----------|-------------|-------------|
| SGPP2     | 2  | 222424543..222562621         | ENSG00000163082 | 1.200623 | 0.682448  | 0.002435585 | 0.047388516 |
| HPGDS     | 4  | complement(94298535..9434287 | ENSG00000163106 | 10.23802 | -0.284881 | 0.002434427 | 0.047388516 |
| MMP10     | 11 | complement(102770502..102780 | ENSG00000166670 | 53.45273 | 0.31993   | 0.002454757 | 0.047698015 |
| GIMAP6    | 7  | complement(150625375..150632 | ENSG00000133561 | 1.506362 | 0.561981  | 0.002466566 | 0.04770129  |
| NFKB1B    | 19 | 38899700..38908893           | ENSG00000104825 | 23.96084 | 0.24776   | 0.002467553 | 0.04770129  |
| DOP1B     | 21 | 36156782..36294274           | ENSG00000142197 | 6.512558 | -0.250909 | 0.002459452 | 0.04770129  |
| SLC35E4   | 22 | 30635781..30669016           | ENSG00000100036 | 1.410877 | -0.474983 | 0.002467983 | 0.04770129  |
| ACSL5     | 10 | 112374116..112428379         | ENSG00000197142 | 63.64215 | 0.406788  | 0.002479698 | 0.047832282 |
| SCO2      | 22 | complement(50523568..5052646 | ENSG00000284194 | 11.01359 | 0.446598  | 0.002481308 | 0.047832282 |
| FMNL3     | 12 | complement(49636499..4970816 | ENSG00000161791 | 6.727082 | 0.242802  | 0.002485253 | 0.047845211 |
| SMARCC2   | 12 | complement(56162359..5618956 | ENSG00000139613 | 13.73687 | -0.244594 | 0.002506835 | 0.04813386  |
| HMOX1     | 22 | 35380361..35394214           | ENSG00000100292 | 237.0286 | -0.377538 | 0.002505838 | 0.04813386  |
| SATB1     | 3  | complement(18345377..1844558 | ENSG00000182568 | 0.631225 | -0.42954  | 0.002516545 | 0.048193654 |
| MSANTD3-  | 9  | 100442271..100577636         | ENSG00000251349 | 5.751448 | -0.29748  | 0.00251482  | 0.048193654 |
| SLFN5     | 17 | 35243071..35273655           | ENSG00000166750 | 5.695797 | 0.414946  | 0.002526825 | 0.048327189 |
| HSPE1-MO  | 2  | 197500413..197550726         | ENSG00000270757 | 7.50228  | 0.69812   | 0.002541831 | 0.048550624 |
| ME3       | 11 | complement(86441108..8667263 | ENSG00000151376 | 13.70966 | -0.328732 | 0.00255055  | 0.048653563 |
| MEI1      | 22 | 41699503..41799456           | ENSG00000167077 | 1.483418 | 0.468618  | 0.002556434 | 0.048702229 |
| SLC39A13  | 11 | 47407132..47416496           | ENSG00000165915 | 7.337154 | 0.303335  | 0.00256186  | 0.048742059 |
| MBNL2     | 13 | 97221434..97394120           | ENSG00000139793 | 2.96118  | -0.317358 | 0.002592368 | 0.049258369 |
| C3AR1     | 12 | complement(8056844..8066359) | ENSG00000171860 | 18.37685 | 0.36433   | 0.002599295 | 0.049325842 |
| SYS1-DBND | 20 | 45363200..45410610           | ENSG00000254806 | 0.18432  | -5.653144 | 0.002603021 | 0.04933249  |
| SERPINE2  | 2  | complement(223975045..224039 | ENSG00000135919 | 15.77372 | 0.601446  | 0.002607608 | 0.049355396 |
| MYD88     | 3  | 38138478..38143022           | ENSG00000172936 | 107.2344 | 0.386907  | 0.002620885 | 0.049542529 |

**Additional file 13: Table S10C. Differential expression analysis of South Africa cohort (72h)**

| Name      | Chromosome | Region                           | Identifier      | Max group means | Log2 fold change | p-value     | FDR p-value |
|-----------|------------|----------------------------------|-----------------|-----------------|------------------|-------------|-------------|
| IFI44L    | 1          | 78619902..78646145               | ENSG00000137959 | 13.99063        | 4.689464         | 3.42266E-37 | 4.99948E-33 |
| RSAD2     | 2          | 6865557..6898239                 | ENSG00000134321 | 16.00564        | 4.003576         | 2.60012E-16 | 1.899E-12   |
| IFIT1     | 10         | 89392546..89406487               | ENSG00000185745 | 30.12772        | 2.936679         | 2.58611E-15 | 9.44382E-12 |
| SIGLEC1   | 20         | complement(3686970..3712600)     | ENSG00000088827 | 45.8506         | 3.795357         | 2.29864E-15 | 9.44382E-12 |
| USP18     | 22         | 18150170..18177397               | ENSG00000184979 | 16.17522        | 3.007769         | 6.88705E-15 | 2.01198E-11 |
| IFITM3    | 11         | complement(319676..329475)       | ENSG00000142089 | 55.49363        | 3.159885         | 1.29028E-13 | 3.1412E-10  |
| TNFSF10   | 3          | complement(172505508..172523475) | ENSG00000121858 | 5.610958        | 3.194075         | 4.84808E-13 | 1.01166E-09 |
| CMPK2     | 2          | complement(6840570..6866635)     | ENSG00000134326 | 10.85801        | 2.823145         | 6.99344E-13 | 1.27692E-09 |
| CXCL11    | 4          | complement(76033682..76041415)   | ENSG00000169248 | 3.931194        | 4.642152         | 6.61637E-12 | 1.07384E-08 |
| APOBEC3A  | 22         | 38952741..38992778               | ENSG00000128383 | 2.391491        | 7.151215         | 3.13851E-11 | 4.58442E-08 |
| ISG20     | 15         | 88635670..88656483               | ENSG00000172183 | 11.67377        | 3.574123         | 3.97264E-11 | 5.2753E-08  |
| MX2       | 21         | 41361999..41409393               | ENSG00000183486 | 15.68062        | 2.636156         | 7.68441E-11 | 9.35385E-08 |
| MX1       | 21         | 41420020..41470071               | ENSG00000157601 | 58.92567        | 3.21008          | 9.5765E-11  | 1.07603E-07 |
| HELZ2     | 20         | complement(63558086..63574239)   | ENSG00000130589 | 7.908044        | 2.773628         | 1.61366E-10 | 1.68363E-07 |
| C1S       | 12         | 6988259..7071032                 | ENSG00000182326 | 5.425181        | 2.646515         | 7.34289E-10 | 7.15051E-07 |
| OAS3      | 12         | 112938051..112976460             | ENSG00000111331 | 20.02884        | 2.41625          | 2.04098E-09 | 1.86329E-06 |
| IFI6      | 1          | complement(27666064..27672212)   | ENSG00000126709 | 1441.857        | 2.922421         | 2.71741E-09 | 2.20518E-06 |
| IL4I1     | 19         | complement(49889654..49929539)   | ENSG00000104951 | 39.63912        | 2.666248         | 2.70566E-09 | 2.20518E-06 |
| NEXN      | 1          | 77888513..77943895               | ENSG00000162614 | 1.974158        | 2.876259         | 3.37774E-09 | 2.59677E-06 |
| IFI27     | 14         | 94104836..94116698               | ENSG00000165949 | 51.56795        | 2.194661         | 4.325E-09   | 3.15877E-06 |
| IDO1      | 8          | 39902275..39928790               | ENSG00000131203 | 7.792875        | 3.142542         | 6.6545E-09  | 4.62868E-06 |
| gene:ENSG | 21         | 5022493..5040666                 | ENSG00000277117 | 2.308514        | 4.310688         | 7.40565E-09 | 4.91702E-06 |
| GCH1      | 14         | complement(54842008..54902826)   | ENSG00000131979 | 16.09649        | 2.846347         | 8.70337E-09 | 5.52739E-06 |
| CXCL10    | 4          | complement(76021118..76023497)   | ENSG00000169245 | 15.4367         | 3.4947           | 1.57237E-08 | 9.56985E-06 |
| GPR35     | 2          | 240605430..240631259             | ENSG00000178623 | 4.172565        | 2.594906         | 2.04188E-08 | 1.19303E-05 |
| ISG15     | 1          | 1001138..1014540                 | ENSG00000187608 | 190.1057        | 2.403584         | 2.85477E-08 | 1.54443E-05 |
| LRG1      | 19         | complement(4536402..4540036)     | ENSG00000171236 | 2.193014        | 2.656598         | 2.84489E-08 | 1.54443E-05 |
| IRF7      | 11         | complement(612553..615983)       | ENSG00000185507 | 33.30131        | 2.055776         | 2.96632E-08 | 1.54747E-05 |
| GRM3      | 7          | 86643909..86684879               | ENSG00000198822 | 0.676374        | 3.747179         | 3.54422E-08 | 1.78519E-05 |
| BATF2     | 11         | complement(64987945..64997018)   | ENSG00000168062 | 3.741642        | 2.524138         | 4.46515E-08 | 2.17408E-05 |
| HAPLN3    | 15         | complement(88877294..88895597)   | ENSG00000140511 | 1.199424        | 3.491274         | 1.35981E-07 | 6.40735E-05 |
| EBI3      | 19         | 4229523..4237528                 | ENSG00000105246 | 17.66902        | 3.460078         | 2.5184E-07  | 0.000114957 |
| GBP4      | 1          | complement(89181144..89198942)   | ENSG00000162654 | 8.91822         | 2.019059         | 2.86134E-07 | 0.000126653 |
| SELENOP   | 5          | complement(42799880..42887392)   | ENSG00000250722 | 3.719648        | -2.24411         | 2.9722E-07  | 0.000127691 |
| SLC2A6    | 9          | complement(133471094..133479127) | ENSG00000160326 | 40.68079        | 2.482864         | 4.43355E-07 | 0.000185031 |
| CFB       | 6          | 31945650..31952084               | ENSG00000243649 | 29.96105        | 2.419185         | 5.51429E-07 | 0.000223742 |
| CCL15     | 17         | complement(35996440..36001553)   | ENSG00000275718 | 11.31566        | 3.585261         | 6.44732E-07 | 0.00025453  |
| HERC5     | 4          | 88457119..88506163               | ENSG00000138646 | 19.08678        | 1.880817         | 6.99758E-07 | 0.000268983 |
| NCF1      | 7          | 74773962..74789376               | ENSG00000158517 | 263.897         | 2.60679          | 7.34343E-07 | 0.00027504  |
| IGFBP4    | 17         | 40443450..40457725               | ENSG00000141753 | 2.299959        | 2.74315          | 8.14242E-07 | 0.000297341 |
| TOP2A     | 17         | complement(40388525..40417896)   | ENSG00000131747 | 1.397676        | -2.07104         | 9.98764E-07 | 0.000355828 |
| UBE2F-SCL | 2          | 237967014..238099412             | ENSG00000258984 | 0.588012        | 5.162514         | 1.0368E-06  | 0.000360584 |
| OAS2      | 12         | 112978395..113011723             | ENSG00000111335 | 30.45014        | 1.807967         | 1.22518E-06 | 0.00040673  |
| KRT23     | 17         | complement(40922700..40937646)   | ENSG00000108244 | 2.464647        | 3.361681         | 1.21917E-06 | 0.00040673  |
| HESX1     | 3          | complement(57197838..57227606)   | ENSG00000163666 | 1.388203        | 2.922873         | 1.73433E-06 | 0.000539008 |
| DDIAS     | 11         | 82899975..82958277               | ENSG00000165490 | 1.589055        | -2.05275         | 1.66752E-06 | 0.000539008 |
| PTGIR     | 19         | complement(46620468..46625089)   | ENSG00000160013 | 3.345894        | 3.173305         | 1.70235E-06 | 0.000539008 |
| APOL3     | 22         | complement(36140330..36166177)   | ENSG00000128284 | 8.843511        | 1.98105          | 1.88211E-06 | 0.000572751 |
| C1R       | 12         | complement(7080214..7092540)     | ENSG00000159403 | 2.666205        | 2.136543         | 2.35967E-06 | 0.000689354 |
| CCL8      | 17         | 34319435..34321402               | ENSG00000108700 | 2.076141        | 3.208953         | 2.3494E-06  | 0.000689354 |
| EPSTI1    | 13         | complement(42886388..42992271)   | ENSG00000133106 | 21.14567        | 1.713873         | 2.6041E-06  | 0.000745844 |
| C4B       | 6          | 32014795..32035418               | ENSG00000224389 | 0.32239         | 3.045643         | 2.9624E-06  | 0.00083215  |
| IFITM1    | 11         | 310041..315272                   | ENSG00000185885 | 3.075528        | 3.033759         | 3.1694E-06  | 0.000873499 |
| XAF1      | 17         | 6755447..6775647                 | ENSG00000132530 | 18.22453        | 1.728062         | 3.3482E-06  | 0.000905689 |
| DLGAP5    | 14         | complement(55148112..55191608)   | ENSG00000126787 | 0.662436        | -2.38435         | 3.61546E-06 | 0.000960201 |

|           |    |                                  |                 |          |          |             |             |
|-----------|----|----------------------------------|-----------------|----------|----------|-------------|-------------|
| gene:ENSG | 17 | complement(7312661..7319174)     | ENSG00000261915 | 0.479037 | 4.556632 | 4.21223E-06 | 0.001098716 |
| IL15RA    | 10 | complement(5943639..5978187)     | ENSG00000134470 | 20.14319 | 2.035722 | 4.36771E-06 | 0.001119283 |
| ZBP1      | 20 | complement(57603846..57620576)   | ENSG00000124256 | 1.368426 | 2.468501 | 4.46198E-06 | 0.001123726 |
| PLEKHG6   | 12 | 6310436..6328506                 | ENSG00000008323 | 3.047757 | 2.588141 | 4.64367E-06 | 0.001149663 |
| GPR84     | 12 | complement(54362445..54364487)   | ENSG00000139572 | 10.87589 | 2.238031 | 5.15397E-06 | 0.001254733 |
| HMMR      | 5  | 163460203..163491941             | ENSG00000072571 | 0.845608 | -2.11743 | 8.35109E-06 | 0.001999743 |
| SEMA4A    | 1  | 156147366..156177752             | ENSG00000196189 | 7.197557 | 1.818326 | 9.63452E-06 | 0.002269862 |
| CD38      | 4  | 15778275..15853232               | ENSG00000004468 | 0.940311 | 2.113976 | 9.86867E-06 | 0.002288121 |
| CA12      | 15 | complement(63321378..63381846)   | ENSG00000074410 | 16.01199 | 2.045512 | 1.03612E-05 | 0.002364774 |
| ICAM1     | 19 | 10271093..10286615               | ENSG00000090339 | 67.21367 | 1.936791 | 1.10786E-05 | 0.002489613 |
| RTKL1-TNF | 20 | 63659300..63698684               | ENSG00000026036 | 0.259379 | 4.418371 | 1.17019E-05 | 0.002589843 |
| MINAR2    | 5  | 129748094..129766732             | ENSG00000186367 | 0.835207 | 3.304794 | 1.28652E-05 | 0.002804812 |
| IFI44     | 1  | 78649796..78664078               | ENSG00000137965 | 43.06461 | 1.603923 | 2.29765E-05 | 0.004935548 |
| LRRC32    | 11 | complement(76657524..76670747)   | ENSG00000137507 | 1.279411 | 2.345062 | 2.37124E-05 | 0.00501982  |
| OTOF      | 2  | complement(26457203..26558756)   | ENSG00000115155 | 0.111658 | 4.997258 | 2.65727E-05 | 0.005481071 |
| FAM111B   | 11 | 59107185..59127412               | ENSG00000189057 | 0.803077 | -2.04785 | 2.66417E-05 | 0.005481071 |
| gene:ENSG | 11 | 66509079..66533613               | ENSG00000256349 | 1.189676 | 2.024694 | 2.85423E-05 | 0.00579052  |
| ANLN      | 7  | 36389821..36453791               | ENSG00000011426 | 0.832835 | -2.02178 | 3.05237E-05 | 0.005944805 |
| gene:ENSG | 7  | 99325879..99394653               | ENSG00000284292 | 0.317736 | -5.25214 | 3.02232E-05 | 0.005944805 |
| IFIT3     | 10 | 89327307..89377473               | ENSG00000119917 | 53.01457 | 1.631672 | 3.0197E-05  | 0.005944805 |
| CMKLR1    | 12 | complement(108288044..108339317) | ENSG00000174600 | 5.343464 | 1.794346 | 3.19445E-05 | 0.00604495  |
| ALOX15B   | 17 | 8039034..8049134                 | ENSG00000179593 | 15.24938 | 1.588561 | 3.22795E-05 | 0.00604495  |
| JUP       | 17 | complement(41754604..41786931)   | ENSG00000173801 | 6.337923 | 1.83551  | 3.16163E-05 | 0.00604495  |
| N4BP3     | 5  | 178113532..178126081             | ENSG00000145911 | 0.796671 | 3.163791 | 3.59212E-05 | 0.006558759 |
| CEP55     | 10 | 93496612..93529092               | ENSG00000138180 | 1.077028 | -1.90104 | 3.55193E-05 | 0.006558759 |
| TIFAB     | 5  | complement(135444226..135452351) | ENSG00000255833 | 2.069445 | 1.74426  | 4.2648E-05  | 0.007690861 |
| ADAM8     | 10 | complement(133262420..133276868) | ENSG00000151651 | 23.92759 | 1.610914 | 4.36693E-05 | 0.00777899  |
| TNIP3     | 4  | complement(121131408..121227466) | ENSG00000050730 | 5.650665 | 2.133899 | 4.51625E-05 | 0.007831335 |
| DHX58     | 17 | complement(42101404..42112714)   | ENSG00000108771 | 9.466933 | 1.640078 | 4.45366E-05 | 0.007831335 |
| CFP       | X  | complement(47623172..47630305)   | ENSG00000126759 | 8.322526 | 1.850711 | 4.55715E-05 | 0.007831335 |
| NEURL3    | 2  | complement(96497646..96508109)   | ENSG00000163121 | 2.639953 | 2.673818 | 4.6526E-05  | 0.007871069 |
| IFIT2     | 10 | 89283694..89309271               | ENSG00000119922 | 45.8107  | 1.597596 | 4.68805E-05 | 0.007871069 |
| IFI35     | 17 | 43006740..43014456               | ENSG00000068079 | 89.14779 | 1.685072 | 4.81437E-05 | 0.007991302 |
| LY6E      | 8  | 143017982..143023832             | ENSG00000160932 | 300.6909 | 1.87038  | 5.30601E-05 | 0.00865397  |
| EPOP      | 17 | complement(38671703..38674957)   | ENSG00000273604 | 3.520957 | 1.74188  | 5.33208E-05 | 0.00865397  |
| PCLAF     | 15 | complement(64364304..64387687)   | ENSG00000166803 | 0.737131 | -2.14229 | 6.24781E-05 | 0.010028764 |
| SOCS1     | 16 | complement(11254417..11256204)   | ENSG00000185338 | 2.736046 | 2.392327 | 6.61502E-05 | 0.010502775 |
| CDK1      | 10 | 60778331..60794852               | ENSG00000170312 | 1.66461  | -1.90197 | 7.85385E-05 | 0.012335609 |
| TRPM2     | 21 | 44350163..44443081               | ENSG00000142185 | 4.670006 | 1.676526 | 8.16556E-05 | 0.012688766 |
| GP1BA     | 17 | 4932277..4935023                 | ENSG00000185245 | 2.774553 | 2.217965 | 8.39967E-05 | 0.012915156 |
| SPATC1    | 8  | 144012280..144047114             | ENSG00000186583 | 1.079085 | 2.139369 | 9.58116E-05 | 0.01457834  |
| IFIH1     | 2  | complement(162267074..162318684) | ENSG00000115267 | 28.62744 | 1.45508  | 9.76317E-05 | 0.014702129 |
| PDGFB     | 22 | complement(39223359..39244982)   | ENSG00000100311 | 8.195521 | 1.479881 | 0.000111101 | 0.016559672 |
| RGPD6     | 2  | complement(110513802..110577222) | ENSG00000183054 | 0.963212 | -1.62316 | 0.000118243 | 0.017446157 |
| GMPR      | 6  | 16238587..16295549               | ENSG00000137198 | 14.99579 | 1.695895 | 0.000122165 | 0.017844626 |
| SCARF1    | 17 | complement(1633858..1645744)     | ENSG00000074660 | 6.891631 | 1.530218 | 0.000126308 | 0.018267072 |
| TMEM176   | 7  | 150800403..150805118             | ENSG00000002933 | 9.775382 | 1.769887 | 0.00012882  | 0.018447805 |
| HSH2D     | 19 | 16134028..16158575               | ENSG00000196684 | 0.377961 | 2.77065  | 0.000138374 | 0.01962358  |
| CXCL9     | 4  | complement(76001275..76007509)   | ENSG00000138755 | 2.21858  | 1.963654 | 0.000149121 | 0.020924019 |
| PDE6G     | 17 | complement(81650459..81663112)   | ENSG00000185527 | 8.57294  | 1.51406  | 0.000150409 | 0.020924019 |
| CCL4      | 17 | 36103827..36105621               | ENSG00000275302 | 182.0497 | 2.331444 | 0.000156285 | 0.021536415 |
| ETV7      | 6  | complement(36354091..36387800)   | ENSG00000010030 | 0.827362 | 2.170386 | 0.000167957 | 0.022716191 |
| IL27      | 16 | complement(28499362..28512051)   | ENSG00000197272 | 8.299176 | 1.635397 | 0.000167929 | 0.022716191 |
| KITLG     | 12 | complement(88492793..88580851)   | ENSG00000049130 | 0.309701 | -1.77711 | 0.000174387 | 0.023369514 |
| BUB1B     | 15 | 40161023..40221123               | ENSG00000156970 | 0.52425  | -2.02206 | 0.000176956 | 0.023498165 |
| BCL3      | 19 | 44747705..44760044               | ENSG00000069399 | 13.04759 | 1.626333 | 0.000178876 | 0.023539141 |
| LAG3      | 12 | 6772512..6778455                 | ENSG00000089692 | 0.857053 | 2.499802 | 0.000186777 | 0.02435935  |
| PPAN-P2RY | 19 | 10106223..10114780               | ENSG00000243207 | 0.260006 | 4.825021 | 0.000195266 | 0.025241162 |
| AIM2      | 1  | complement(159062484..159147096) | ENSG00000163568 | 8.953319 | 1.713803 | 0.00021611  | 0.027213123 |
| MT1H      | 16 | 56669814..56671129               | ENSG00000205358 | 41.71205 | 2.308783 | 0.00021448  | 0.027213123 |

|          |    |                                  |                 |          |          |             |             |
|----------|----|----------------------------------|-----------------|----------|----------|-------------|-------------|
| RELB     | 19 | 45001449..45038198               | ENSG00000104856 | 14.10966 | 1.487069 | 0.000215788 | 0.027213123 |
| WNT5A    | 3  | complement(55465715..55490539)   | ENSG00000114251 | 0.86885  | 2.024822 | 0.000236232 | 0.029492598 |
| STAT1    | 2  | complement(190908460..191020960) | ENSG00000115415 | 56.43578 | 1.515577 | 0.000247829 | 0.030586584 |
| IL32     | 16 | 3065297..3082192                 | ENSG00000008517 | 3.478458 | 1.668301 | 0.000249182 | 0.030586584 |
| FCAR     | 19 | 54874235..54891420               | ENSG00000186431 | 0.804449 | 1.891905 | 0.000253885 | 0.030904165 |
| TNFAIP6  | 2  | 151357592..151380046             | ENSG00000123610 | 799.2822 | 2.646047 | 0.000258804 | 0.031242603 |
| CLU      | 8  | complement(27596917..27614700)   | ENSG00000120885 | 0.770083 | 1.483051 | 0.000262917 | 0.03147889  |
| CCL5     | 17 | complement(35871491..35880793)   | ENSG00000271503 | 18.62323 | 1.872057 | 0.00027564  | 0.032733942 |
| SPTLC3   | 20 | 13008972..13169103               | ENSG00000172296 | 0.286882 | -2.62838 | 0.000295397 | 0.034797289 |
| TMEM176B | 7  | complement(150791285..150801360) | ENSG00000106565 | 18.17965 | 1.553965 | 0.000315577 | 0.036877036 |
| FCER1A   | 1  | 159289714..159308224             | ENSG00000179639 | 0.587088 | -3.94262 | 0.000329279 | 0.03817285  |
| UBD      | 6  | complement(29555515..29559732)   | ENSG00000213886 | 1.737051 | 2.385073 | 0.000346993 | 0.039597848 |
| PSTPIP2  | 18 | complement(45983536..46072272)   | ENSG00000152229 | 15.66556 | 1.388633 | 0.000345142 | 0.039597848 |
| DDIT4    | 10 | 72273919..72276036               | ENSG00000168209 | 73.00737 | 1.553868 | 0.000352851 | 0.039646888 |
| CELF4    | 18 | complement(37243040..37565827)   | ENSG00000101489 | 0.337066 | 2.295556 | 0.000351669 | 0.039646888 |
| ZSWIM4   | 19 | 13795460..13832230               | ENSG00000132003 | 3.702802 | 1.489519 | 0.000355704 | 0.039662335 |
| OASL     | 12 | complement(121017763..121039242) | ENSG00000135114 | 26.94545 | 1.361185 | 0.00037484  | 0.041479492 |
| ZC3H12A  | 1  | 37474580..37484377               | ENSG00000163874 | 36.82314 | 1.484111 | 0.000380598 | 0.041799995 |
| TRAF1    | 9  | complement(120902393..120929173) | ENSG00000056558 | 27.28013 | 1.684391 | 0.000405242 | 0.043847218 |
| SOCS3    | 17 | complement(78356778..78360077)   | ENSG00000184557 | 23.48187 | 1.765662 | 0.000405074 | 0.043847218 |
| ANGPTL4  | 19 | 8363289..8374370                 | ENSG00000167772 | 11.9998  | 1.650705 | 0.000423859 | 0.045195254 |
| POU2F2   | 19 | complement(42086110..42196585)   | ENSG00000028277 | 1.010457 | 1.466706 | 0.000423889 | 0.045195254 |
| CAVIN1   | 17 | complement(42402449..42423256)   | ENSG00000177469 | 3.734707 | 1.539715 | 0.00042823  | 0.04532719  |
| NFKB2    | 10 | 102394110..102402524             | ENSG00000077150 | 40.67971 | 1.514006 | 0.000437472 | 0.045901484 |
| RPS4Y1   | Y  | 2841602..2932000                 | ENSG00000129824 | 53.11353 | -2.44606 | 0.00043994  | 0.045901484 |
| GPX3     | 5  | 151020438..151028992             | ENSG00000211445 | 75.51416 | 1.592401 | 0.000446473 | 0.046252662 |
| ATF5     | 19 | 49928702..49933935               | ENSG00000169136 | 25.60583 | 1.399031 | 0.000454335 | 0.046735722 |
| AGRN     | 1  | 1020120..1056118                 | ENSG00000188157 | 22.53067 | 1.64405  | 0.000467129 | 0.047715762 |
| PLEKHG3  | 14 | 64704102..64750249               | ENSG00000126822 | 1.799427 | 1.494591 | 0.000478762 | 0.048230463 |
| SIPA1L1  | 14 | 71320449..71741229               | ENSG00000197555 | 2.783985 | 1.391314 | 0.000478772 | 0.048230463 |
| CRISPLD2 | 16 | 84819985..84920768               | ENSG00000103196 | 0.196627 | 2.162078 | 0.000488916 | 0.048915072 |
| C1QTNF1  | 17 | 79022814..79049788               | ENSG00000173918 | 0.738731 | 2.785381 | 0.000496733 | 0.049358994 |
| CH25H    | 10 | complement(89205629..89207317)   | ENSG00000138135 | 1.20667  | 2.41993  | 0.000500687 | 0.04941575  |
