# Supplementary material for: Human alveolar macrophage response to Mycobacterium tuberculosis: immune characteristics underlying large inter-individual variability
Source: Research Square preprint supplement (doi:10.21203/rs.3.rs-2986649/v1), 2023-06-08
Supplement: Supplementary file 7 [file 5e6ef87319e8d684335b40ee.pdf]

Additional file 6: Table S4. Differential expression of RNAs control versus *M.tb* infected AMs in all 28 donor AMs at 2h, 24h and 72h (Suppl. Tables S4A, B, and C), using separate non-infected control AMs for each time point. baseMean: log2 RPMs in control cells at each time point; log2FoldChange: RPM ratios of infected/control. lfcSE: log fold-change standard error, stat: test statistic from DESeq2; pvalue: unadjusted p values. padj: FDR-adjusted p value.

| Gene      | S4A: 2h     |                |             |             |             |             |
|-----------|-------------|----------------|-------------|-------------|-------------|-------------|
|           | baseMean    | log2FoldChange | lfcSE       | stat        | pvalue      | padj        |
| CSF2      | 78.61617599 | 3.377558739    | 0.308459944 | 10.94974827 | 6.66E-28    | 1.30E-23    |
| IL1B      | 4561.340615 | 1.281010646    | 0.153130296 | 8.365494475 | 5.99E-17    | 3.91E-13    |
| IL6       | 1754.819037 | 1.766649188    | 0.210162717 | 8.406101778 | 4.24E-17    | 3.91E-13    |
| NFKB1Z    | 10891.28273 | 0.865357358    | 0.10727297  | 8.066872382 | 7.21E-16    | 3.53E-12    |
| CCL3L3    | 554.2828804 | 1.21567708     | 0.153330598 | 7.928470208 | 2.22E-15    | 7.49E-12    |
| IER3      | 6173.41637  | 0.796628111    | 0.100531    | 7.9242036   | 2.30E-15    | 7.49E-12    |
| NFKBIA    | 13099.77254 | 0.64427635     | 0.081623541 | 7.89326638  | 2.94E-15    | 8.24E-12    |
| CCL4      | 2174.05987  | 1.000850512    | 0.127588905 | 7.844338146 | 4.35E-15    | 1.07E-11    |
| PDE4B     | 435.3264346 | 0.492166183    | 0.063434937 | 7.758598131 | 8.59E-15    | 1.87E-11    |
| SERPINB2  | 1158.791876 | 1.094106826    | 0.148989668 | 7.34350804  | 2.08E-13    | 4.07E-10    |
| CCL20     | 5657.404964 | 1.37738543     | 0.189266971 | 7.277473829 | 3.40E-13    | 6.06E-10    |
| CXCL1     | 293.5867136 | 1.690508385    | 0.23375014  | 7.232117107 | 4.76E-13    | 7.76E-10    |
| IL10      | 22.55436007 | 1.577335561    | 0.219243116 | 7.194458767 | 6.27E-13    | 9.45E-10    |
| TNFAIP8   | 571.8161196 | 0.615477644    | 0.086047654 | 7.152753359 | 8.51E-13    | 1.19E-09    |
| F3        | 194.8818206 | 1.014514315    | 0.142365133 | 7.126143135 | 1.03E-12    | 1.35E-09    |
| OR2B11    | 34.6220274  | 2.1849835      | 0.322617045 | 6.772684613 | 1.26E-11    | 1.55E-08    |
| OR5B21    | 220.0761845 | 0.676761855    | 0.1083418   | 6.246544315 | 4.20E-10    | 4.83E-07    |
| SOD2      | 20257.21645 | 0.345262748    | 0.056938651 | 6.063767619 | 1.33E-09    | 1.45E-06    |
| CXCL3     | 10829.49481 | 0.658200014    | 0.110076971 | 5.979452474 | 2.24E-09    | 2.31E-06    |
| TM4SF19   | 300.8473395 | -0.383283467   | 0.064325892 | -5.95846332 | 2.55E-09    | 2.49E-06    |
| NLRP3     | 99.18160534 | 1.20980837     | 0.212117121 | 5.700060255 | 1.20E-08    | 1.07E-05    |
| TNFAIP6   | 2211.433212 | 0.735287611    | 0.128969    | 5.70127406  | 1.19E-08    | 1.07E-05    |
| IFNG      | 45.53170261 | 2.104536181    | 0.370249148 | 5.684108101 | 1.31E-08    | 1.12E-05    |
| CXCL2     | 6680.827698 | 1.038297782    | 0.184862224 | 5.616603316 | 1.95E-08    | 1.59E-05    |
| CCL3      | 3259.076378 | 0.781638751    | 0.141903382 | 5.508246115 | 3.62E-08    | 2.84E-05    |
| REG       | 1782.578432 | 1.039826355    | 0.19095602  | 5.445370893 | 5.17E-08    | 3.89E-05    |
| LINC00346 | 34.59202536 | 1.39651881     | 0.2617739   | 5.334828299 | 9.56E-08    | 6.94E-05    |
| GOS2      | 348.7209299 | 0.507174313    | 0.096322613 | 5.265371201 | 1.40E-07    | 9.78E-05    |
| KANK1     | 61.27531895 | 0.782343146    | 0.148876721 | 5.254972971 | 1.48E-07    | 1.00E-04    |
| PTX3      | 177.8767351 | 1.079788713    | 0.209980067 | 5.142339121 | 2.71E-07    | 0.000177121 |
| SPRY2     | 54.02424806 | -0.693740819   | 0.135486925 | -5.12035254 | 3.05E-07    | 0.000192649 |
| NBN       | 669.883533  | 0.275081652    | 0.054010898 | 5.093076836 | 3.52E-07    | 0.000215596 |
| AGPAT9    | 293.6508332 | -0.416272788   | 0.081858303 | -5.08528486 | 3.67E-07    | 0.000217831 |
| ARL4C     | 40.35486559 | -0.702707291   | 0.140786154 | -4.99130966 | 6.00E-07    | 0.000335548 |
| NINJ1     | 744.8114449 | 0.48311793     | 0.096723777 | 4.99482076  | 5.89E-07    | 0.000335548 |
| ZFX       | 932.3222701 | 0.345148756    | 0.069228779 | 4.985625361 | 6.18E-07    | 0.000335967 |
| LYPD3     | 51.41533624 | 0.814078085    | 0.166209296 | 4.897909475 | 9.69E-07    | 0.00051266  |
| ADORA2A   | 15.29732884 | 1.414681982    | 0.29324733  | 4.82419391  | 1.41E-06    | 0.00072442  |
| CCL15     | 18.06098791 | 1.671640377    | 0.349566206 | 4.782042289 | 1.74E-06    | 0.000871309 |
| NFKB2     | 1024.184741 | 0.361816224    | 0.075780392 | 4.774536178 | 1.80E-06    | 0.000881832 |
| AMPD3     | 77.79196104 | 0.6586112      | 0.139929028 | 4.706751752 | 2.52E-06    | 0.001202182 |
| GPR84     | 127.1423227 | 0.862070236    | 0.186342449 | 4.62626868  | 3.72E-06    | 0.00173595  |
| JUN       | 177.3666207 | 0.633162995    | 0.139386356 | 4.542503399 | 5.56E-06    | 0.002531677 |
| CXCL5     | 3228.808804 | 0.509871764    | 0.113426279 | 4.495181978 | 6.95E-06    | 0.00309369  |
| TNIP3     | 141.7185127 | 0.626646907    | 0.141886976 | 4.416521693 | 1.00E-05    | 0.004364913 |
| LIF       | 134.431019  | 0.740554649    | 0.168128479 | 4.404694874 | 1.06E-05    | 0.004509747 |
| BIRC3     | 214.6478081 | 0.418423922    | 0.095474825 | 4.382557613 | 1.17E-05    | 0.004785356 |
| ZNF267    | 2984.265591 | 0.193882486    | 0.044224976 | 4.384004312 | 1.17E-05    | 0.004785356 |
| RASGRP3   | 41.90781682 | 0.80968604     | 0.186573927 | 4.339759862 | 1.43E-05    | 0.005700591 |
| KBTD7     | 379.9258208 | 0.450743159    | 0.106120603 | 4.24746133  | 2.16E-05    | 0.008467943 |
| DOLK      | 383.7466123 | 0.361777903    | 0.086605426 | 4.177312191 | 2.95E-05    | 0.011326425 |
| CCL22     | 352.2815844 | 0.451345075    | 0.109202588 | 4.133098712 | 3.58E-05    | 0.013478562 |
| LINC00515 | 723.6119851 | 0.495586769    | 0.120731247 | 4.104875756 | 4.05E-05    | 0.014947085 |
| CCR7      | 115.8091965 | 0.592005762    | 0.14853992  | 3.985499406 | 6.73E-05    | 0.024420126 |
| TNF       | 11775.1251  | 0.300547417    | 0.076012312 | 3.953930732 | 7.69E-05    | 0.027372645 |
| IL1A      | 2331.071554 | 0.495326282    | 0.125422711 | 3.949255103 | 7.84E-05    | 0.027414371 |
| PTGS2     | 5050.844177 | 0.309261181    | 0.078746274 | 3.927311934 | 8.59E-05    | 0.029512111 |
| NARF      | 355.9792843 | -0.215836774   | 0.056236717 | -3.8380045  | 0.000124038 | 0.041880005 |
| TNFAIP3   | 1883.219639 | 0.727427951    | 0.19023876  | 3.823763102 | 0.00013143  | 0.043623689 |
| MARCKS    | 107.9410563 | 0.699532428    | 0.183303321 | 3.816256163 | 0.000135492 | 0.044222779 |
| SLC2A6    | 312.7695863 | 0.297786305    | 0.078309852 | 3.802667166 | 0.000143147 | 0.045954756 |
| PLCXD1    | 137.7320976 | -0.354190488   | 0.093421477 | -3.79131758 | 0.00014985  | 0.047330908 |

**Additional file 6: Table S4. Differential expression of RNAs control versus *M.tb* infected AMs in all 28 don at 2h, 24h and 72h (Suppl. Tables S4A, B, and C), using separate non-infected control AMs for each time p**

| S4B: 24h |             |                |             |              |          |          |
|----------|-------------|----------------|-------------|--------------|----------|----------|
| Gene     | baseMean    | log2FoldChange | lfcSE       | stat         | pvalue   | padj     |
| INHBA    | 4383.210884 | 2.305522311    | 0.140710317 | 16.38488465  | 2.45E-60 | 4.72E-56 |
| CCL3     | 5420.860212 | 1.549634818    | 0.098486329 | 15.73451705  | 8.77E-56 | 8.45E-52 |
| DCUN1D3  | 444.2160304 | 1.889492315    | 0.124646074 | 15.15885942  | 6.62E-52 | 4.25E-48 |
| SERPINB7 | 41.94863524 | 6.893715809    | 0.472819075 | 14.58002898  | 3.76E-48 | 1.81E-44 |
| IL1B     | 15588.33476 | 2.288415746    | 0.157562824 | 14.52383048  | 8.56E-48 | 3.30E-44 |
| SERPINB2 | 10295.23192 | 3.146243555    | 0.217442547 | 14.46930968  | 1.89E-47 | 6.08E-44 |
| SCARF1   | 264.1116703 | 1.453547521    | 0.101956717 | 14.25651553  | 4.08E-46 | 1.12E-42 |
| CXCL3    | 1451.493281 | 1.622249558    | 0.117504581 | 13.80584093  | 2.35E-43 | 5.66E-40 |
| PPBP     | 616.6665382 | 2.87816522     | 0.214310493 | 13.42988476  | 4.04E-41 | 8.65E-38 |
| CISH     | 549.5478519 | 2.078644205    | 0.156076173 | 13.31813921  | 1.82E-40 | 3.50E-37 |
| CCL20    | 5070.755564 | 2.064866118    | 0.160444555 | 12.86965534  | 6.67E-38 | 1.17E-34 |
| EMP1     | 1796.72616  | 1.143433374    | 0.089992707 | 12.70584488  | 5.49E-37 | 8.81E-34 |
| ETS2     | 2133.574722 | 1.532595271    | 0.121474627 | 12.61658762  | 1.71E-36 | 2.54E-33 |
| SPRED1   | 967.6293434 | 1.521603749    | 0.121749361 | 12.49783768  | 7.67E-36 | 1.06E-32 |
| CCL3L3   | 260.3487733 | 2.138993191    | 0.172295668 | 12.41466615  | 2.18E-35 | 2.79E-32 |
| DPP4     | 137.3578149 | 2.985202916    | 0.241450083 | 12.36364418  | 4.11E-35 | 4.95E-32 |
| TLR2     | 1209.477317 | 1.517797548    | 0.12364074  | 12.27586912  | 1.22E-34 | 1.38E-31 |
| CXCL1    | 568.4383038 | 2.876177896    | 0.23562222  | 12.20673456  | 2.86E-34 | 3.06E-31 |
| IL6      | 96.03517463 | 3.734194443    | 0.306670189 | 12.17658115  | 4.14E-34 | 4.20E-31 |
| TMEM173  | 154.1522994 | 1.555625732    | 0.128810792 | 12.07682763  | 1.40E-33 | 1.35E-30 |
| MPEG1    | 291.6887392 | -1.242023373   | 0.10340441  | -12.01131923 | 3.10E-33 | 2.84E-30 |
| MS4A4A   | 2213.279997 | -0.807965147   | 0.068364581 | -11.81847587 | 3.13E-32 | 2.74E-29 |
| TFPI2    | 366.847363  | 1.767377375    | 0.150077879 | 11.7764016   | 5.17E-32 | 4.33E-29 |
| CD274    | 1512.259315 | 1.039206836    | 0.088285311 | 11.77100497  | 5.51E-32 | 4.42E-29 |
| IL3RA    | 402.4177024 | 1.858620529    | 0.15798544  | 11.76450517  | 5.95E-32 | 4.58E-29 |
| IDO1     | 1335.405852 | 3.862043365    | 0.331016914 | 11.66720855  | 1.87E-31 | 1.39E-28 |
| IL2RA    | 76.77759614 | 3.34058494     | 0.286580762 | 11.65669642  | 2.12E-31 | 1.51E-28 |
| TNFAIP6  | 9552.540813 | 1.429510538    | 0.125118617 | 11.42524252  | 3.13E-30 | 2.15E-27 |
| SERPINE1 | 2570.914449 | 1.294873066    | 0.113584942 | 11.40004159  | 4.18E-30 | 2.78E-27 |
| IL7R     | 5906.277628 | 1.403965146    | 0.123248522 | 11.39133457  | 4.62E-30 | 2.97E-27 |
| CCL4     | 9491.79488  | 1.25884123     | 0.111040491 | 11.33677646  | 8.63E-30 | 5.36E-27 |
| CXCL5    | 28416.86762 | 1.573049155    | 0.139418183 | 11.28295551  | 1.59E-29 | 9.59E-27 |
| CSF1     | 18649.64658 | 1.255211145    | 0.111990398 | 11.20820326  | 3.72E-29 | 2.17E-26 |
| CKB      | 222.5548241 | 1.65846753     | 0.148858566 | 11.14123004  | 7.90E-29 | 4.48E-26 |
| TNF      | 695.6472635 | 1.422489838    | 0.127754976 | 11.13451612  | 8.52E-29 | 4.69E-26 |
| ECSCR    | 41.34211868 | 2.43428834     | 0.22367212  | 10.88328909  | 1.38E-27 | 7.41E-25 |
| FAM198B  | 246.2650758 | -1.44300179    | 0.132995059 | -10.85004063 | 1.99E-27 | 1.04E-24 |
| NUPR1    | 3950.990398 | -1.410508719   | 0.131100354 | -10.75900008 | 5.38E-27 | 2.73E-24 |
| HSD11B1  | 456.9548496 | 1.674841493    | 0.156441209 | 10.70588436  | 9.55E-27 | 4.72E-24 |
| EEPD1    | 149.8600465 | -1.209777846   | 0.113110718 | -10.69551915 | 1.07E-26 | 5.14E-24 |
| PTGS2    | 882.4982746 | 1.714135245    | 0.16040048  | 10.68659674  | 1.18E-26 | 5.53E-24 |
| CSF2     | 40.2425273  | 4.801327111    | 0.449657032 | 10.67775386  | 1.29E-26 | 5.93E-24 |

|         |             |              |             |              |          |          |
|---------|-------------|--------------|-------------|--------------|----------|----------|
| ADORA2A | 51.04020773 | 2.303186601  | 0.215980508 | 10.66386323  | 1.50E-26 | 6.73E-24 |
| SCD     | 4969.07607  | -0.650348234 | 0.061831633 | -10.51805047 | 7.13E-26 | 3.12E-23 |
| FAM124A | 62.08833886 | 2.300946865  | 0.219471631 | 10.48402863  | 1.02E-25 | 4.38E-23 |
| APOL4   | 179.3351866 | 1.971371481  | 0.189908651 | 10.38063021  | 3.04E-25 | 1.27E-22 |
| ABI3BP  | 23.50386505 | 4.468801653  | 0.430883614 | 10.37124994  | 3.35E-25 | 1.37E-22 |
| KLHDC8B | 296.6513651 | -1.05775744  | 0.102589576 | -10.31057425 | 6.31E-25 | 2.53E-22 |
| CCL5    | 481.818689  | 1.611667319  | 0.157058885 | 10.26154818  | 1.05E-24 | 4.13E-22 |
| SLC2A3  | 1113.228612 | 1.126078782  | 0.109891345 | 10.24720174  | 1.22E-24 | 4.69E-22 |
| CD40    | 2377.879133 | 0.920809926  | 0.089984309 | 10.23300545  | 1.41E-24 | 5.28E-22 |
| ITGB3   | 661.3370218 | 1.528264981  | 0.149360245 | 10.23207336  | 1.42E-24 | 5.28E-22 |
| CYP27B1 | 297.2631181 | 2.255516207  | 0.220586297 | 10.22509666  | 1.53E-24 | 5.46E-22 |
| SLC7A2  | 35.4190351  | 3.373782648  | 0.32991313  | 10.22627577  | 1.51E-24 | 5.46E-22 |
| HCAR2   | 237.9792568 | 1.404968918  | 0.137844548 | 10.19241559  | 2.14E-24 | 7.51E-22 |
| PVALB   | 80.99773061 | -1.539612374 | 0.151448906 | -10.16588642 | 2.82E-24 | 9.69E-22 |
| YPEL3   | 214.2203861 | -0.86238677  | 0.085195132 | -10.12248878 | 4.39E-24 | 1.48E-21 |
| IER3    | 2658.14964  | 1.030096079  | 0.102327009 | 10.06670758  | 7.75E-24 | 2.58E-21 |
| HCAR3   | 258.2970321 | 1.315036505  | 0.131125935 | 10.02880555  | 1.14E-23 | 3.72E-21 |
| FABP3   | 1344.004403 | -0.605600943 | 0.060925666 | -9.939997034 | 2.79E-23 | 8.95E-21 |
| CFP     | 406.8055419 | -1.126690019 | 0.113554683 | -9.922004032 | 3.34E-23 | 1.04E-20 |
| SOCS3   | 142.1813865 | 1.42096971   | 0.143221334 | 9.921494705  | 3.36E-23 | 1.04E-20 |
| EDN1    | 440.0068244 | 1.63594468   | 0.165092516 | 9.909260096  | 3.79E-23 | 1.16E-20 |
| STON1   | 36.58323936 | 3.229256886  | 0.326252657 | 9.898024787  | 4.25E-23 | 1.28E-20 |
| VWA8    | 1566.48698  | 0.99255747   | 0.10030772  | 9.895125448  | 4.37E-23 | 1.30E-20 |
| RHCG    | 72.02146111 | 1.774821915  | 0.179438231 | 9.890990946  | 4.55E-23 | 1.31E-20 |
| TRIB2   | 89.32916368 | 1.259785084  | 0.12735012  | 9.892296012  | 4.50E-23 | 1.31E-20 |
| SGPP2   | 56.20202721 | 2.007397521  | 0.203190593 | 9.87938216   | 5.11E-23 | 1.45E-20 |
| OCSTAMP | 96.82827258 | 2.061680435  | 0.20900044  | 9.864478916  | 5.93E-23 | 1.66E-20 |
| BMF     | 185.4140474 | -0.958176809 | 0.097175129 | -9.860309152 | 6.19E-23 | 1.70E-20 |
| NFAT5   | 965.1782704 | 0.608037275  | 0.062119858 | 9.788130418  | 1.27E-22 | 3.44E-20 |
| CCL2    | 1725.676214 | 1.505114582  | 0.154357898 | 9.750810321  | 1.83E-22 | 4.90E-20 |
| RSPO3   | 186.0699737 | 2.107955624  | 0.216350603 | 9.743238968  | 1.97E-22 | 5.20E-20 |
| VSIG4   | 316.6768179 | -0.771935025 | 0.079298263 | -9.734576722 | 2.15E-22 | 5.59E-20 |
| CCL24   | 5936.662623 | 1.96069994   | 0.201503898 | 9.730332563  | 2.24E-22 | 5.75E-20 |
| FAM134B | 602.7622563 | -0.593736298 | 0.061213683 | -9.699404921 | 3.03E-22 | 7.69E-20 |
| IL36G   | 21.79811789 | 3.68646998   | 0.380428505 | 9.690309556  | 3.32E-22 | 8.29E-20 |
| APBB2   | 396.3324651 | 1.07199517   | 0.111102645 | 9.648691733  | 4.98E-22 | 1.23E-19 |
| TGFA    | 103.1491956 | 1.682377581  | 0.174468635 | 9.642865498  | 5.27E-22 | 1.29E-19 |
| IL8     | 73445.91326 | 1.373652784  | 0.142506773 | 9.639210481  | 5.46E-22 | 1.32E-19 |
| ARHGDIB | 7362.648567 | -0.612168131 | 0.063829364 | -9.590697718 | 8.75E-22 | 2.08E-19 |
| ALDH2   | 4415.862918 | -0.925731527 | 0.096624204 | -9.580741591 | 9.64E-22 | 2.26E-19 |
| UGDH    | 355.1393097 | 0.601222407  | 0.062857336 | 9.564872559  | 1.12E-21 | 2.61E-19 |
| MRPS6   | 3506.715262 | 0.930377904  | 0.097903934 | 9.5029675    | 2.04E-21 | 4.68E-19 |
| MXI1    | 227.4106578 | -0.768157256 | 0.08118069  | -9.462314946 | 3.01E-21 | 6.83E-19 |
| MRC1    | 6152.855244 | 1.131985242  | 0.119784724 | 9.450163619  | 3.38E-21 | 7.58E-19 |
| CYP3A5  | 62.78415224 | 2.647865513  | 0.280505624 | 9.439616486  | 3.74E-21 | 8.29E-19 |
| PIM1    | 3406.275997 | 0.869892052  | 0.092575589 | 9.396559741  | 5.64E-21 | 1.23E-18 |
| LAMB3   | 98.568742   | 1.023441797  | 0.109982135 | 9.305527598  | 1.33E-20 | 2.89E-18 |

|           |             |              |             |              |          |          |
|-----------|-------------|--------------|-------------|--------------|----------|----------|
| EREG      | 517.1627249 | 1.638413775  | 0.176293303 | 9.293681282  | 1.49E-20 | 3.19E-18 |
| IL1A      | 1681.836055 | 1.87851716   | 0.202199666 | 9.290406833  | 1.54E-20 | 3.25E-18 |
| KCNN4     | 1436.957974 | 0.82983376   | 0.089454793 | 9.276571203  | 1.75E-20 | 3.67E-18 |
| DUSP5     | 699.5476242 | 1.408019153  | 0.15231009  | 9.244424635  | 2.37E-20 | 4.90E-18 |
| C10orf128 | 586.1789223 | 0.968693433  | 0.105076773 | 9.218911162  | 3.00E-20 | 6.15E-18 |
| KDM6B     | 1179.749715 | 0.730404598  | 0.080188398 | 9.108606906  | 8.34E-20 | 1.69E-17 |
| BHLHE40   | 2838.693937 | 0.824664891  | 0.09057045  | 9.105231216  | 8.61E-20 | 1.73E-17 |
| PIM3      | 2224.574305 | 0.489375083  | 0.053769752 | 9.101308167  | 8.93E-20 | 1.77E-17 |
| USF2      | 1528.3062   | -0.532153879 | 0.058646877 | -9.073865527 | 1.15E-19 | 2.26E-17 |
| APOC1     | 6841.869399 | -0.726707882 | 0.080112702 | -9.071069481 | 1.18E-19 | 2.29E-17 |
| ABTB2     | 69.30293268 | 1.010481359  | 0.111438477 | 9.067616392  | 1.22E-19 | 2.34E-17 |
| PPARD     | 1342.650688 | 1.015641111  | 0.112122031 | 9.058354572  | 1.32E-19 | 2.53E-17 |
| MOB3B     | 432.1815419 | 1.310743511  | 0.145832239 | 8.988022929  | 2.52E-19 | 4.75E-17 |
| MIR155HG  | 161.0476688 | 1.276116376  | 0.143001431 | 8.923801436  | 4.51E-19 | 8.43E-17 |
| RUNX1     | 152.5779312 | 1.319402054  | 0.14790289  | 8.92073204   | 4.63E-19 | 8.58E-17 |
| MMP9      | 7830.13448  | 0.865835307  | 0.097383481 | 8.890987413  | 6.06E-19 | 1.11E-16 |
| GPNMB     | 30408.40748 | -0.602630699 | 0.067846523 | -8.882263588 | 6.55E-19 | 1.18E-16 |
| HBEGF     | 5126.974826 | 1.007873756  | 0.113458757 | 8.883172867  | 6.50E-19 | 1.18E-16 |
| CA12      | 103.1450885 | 1.452171208  | 0.164220668 | 8.842804194  | 9.33E-19 | 1.63E-16 |
| FAM129B   | 3422.847187 | 0.714873021  | 0.080835638 | 8.843537768  | 9.27E-19 | 1.63E-16 |
| STAC      | 641.7424579 | 1.028394608  | 0.116274439 | 8.844545838  | 9.19E-19 | 1.63E-16 |
| IL1RN     | 30576.76402 | 0.973223129  | 0.110072167 | 8.841682308  | 9.43E-19 | 1.64E-16 |
| TNFRSF21  | 404.6832251 | -0.965864525 | 0.109262023 | -8.83989235  | 9.58E-19 | 1.65E-16 |
| APOC2     | 1711.42036  | -0.443753017 | 0.050213646 | -8.837299304 | 9.81E-19 | 1.67E-16 |
| CXCL2     | 765.1642031 | 1.5154421    | 0.172389104 | 8.790822987  | 1.48E-18 | 2.51E-16 |
| VDR       | 948.9860568 | 1.127177201  | 0.128387697 | 8.779479855  | 1.64E-18 | 2.75E-16 |
| TREM2     | 655.7098908 | -0.914983729 | 0.10435021  | -8.768393785 | 1.81E-18 | 3.01E-16 |
| MSC       | 1006.985327 | 0.683525889  | 0.078312593 | 8.72817336   | 2.59E-18 | 4.26E-16 |
| MMP1      | 403.1166381 | 1.353100235  | 0.155702346 | 8.690300883  | 3.61E-18 | 5.90E-16 |
| BAALC     | 43.24587492 | 1.513036823  | 0.174168025 | 8.687225027  | 3.71E-18 | 6.01E-16 |
| TM4SF1    | 383.2404289 | 1.469368765  | 0.169990037 | 8.643852237  | 5.43E-18 | 8.73E-16 |
| TSLP      | 27.40605291 | 2.444979819  | 0.284257905 | 8.601272923  | 7.88E-18 | 1.26E-15 |
| BTBD2     | 340.9104111 | -0.557055607 | 0.065026553 | -8.566586765 | 1.07E-17 | 1.68E-15 |
| LIF       | 51.74317231 | 1.641818177  | 0.191787429 | 8.560614138  | 1.12E-17 | 1.76E-15 |
| FLT1      | 27.61470657 | 1.5365463    | 0.179618032 | 8.554521424  | 1.18E-17 | 1.84E-15 |
| DNASE2    | 1613.78923  | -0.780171522 | 0.091479179 | -8.528405386 | 1.48E-17 | 2.29E-15 |
| KIAA1462  | 115.1270937 | 1.220980041  | 0.143222135 | 8.525079151  | 1.53E-17 | 2.33E-15 |
| ISG20     | 63.99541402 | 2.004901284  | 0.235213627 | 8.523746321  | 1.54E-17 | 2.34E-15 |
| ELOVL7    | 486.0316433 | 0.875799656  | 0.103345118 | 8.474514082  | 2.36E-17 | 3.55E-15 |
| LSMD1     | 186.1069456 | -0.738754438 | 0.087221496 | -8.46986663  | 2.46E-17 | 3.67E-15 |
| CD226     | 185.2410131 | 1.258571588  | 0.148641094 | 8.467184649  | 2.51E-17 | 3.70E-15 |
| FUCA1     | 704.2317209 | -1.192004755 | 0.14077677  | -8.46733985  | 2.51E-17 | 3.70E-15 |
| NNMT      | 86.43607432 | 2.321711819  | 0.274690251 | 8.452108544  | 2.86E-17 | 4.18E-15 |
| IGSF6     | 2420.41175  | 0.869280613  | 0.102964162 | 8.442555091  | 3.10E-17 | 4.50E-15 |
| PTPRF     | 134.835711  | 1.857741136  | 0.220126991 | 8.439406391  | 3.19E-17 | 4.59E-15 |
| ADCK3     | 191.091426  | -0.727215231 | 0.086214103 | -8.43499161  | 3.31E-17 | 4.73E-15 |
| AMDHD2    | 344.8693566 | -0.571806487 | 0.068043833 | -8.403502016 | 4.33E-17 | 6.14E-15 |

|          |             |              |             |              |          |          |
|----------|-------------|--------------|-------------|--------------|----------|----------|
| RAB42    | 391.6695282 | -0.76050639  | 0.090872363 | -8.368951447 | 5.81E-17 | 8.18E-15 |
| GBP1P1   | 40.63224392 | 3.504945295  | 0.420293872 | 8.3392729    | 7.47E-17 | 1.03E-14 |
| IFI44L   | 142.3235524 | 2.264205989  | 0.27153463  | 8.338553319  | 7.52E-17 | 1.03E-14 |
| ZNF589   | 374.1434581 | -0.564570771 | 0.067701235 | -8.339150196 | 7.48E-17 | 1.03E-14 |
| GLIPR2   | 2013.608808 | 0.900225408  | 0.108107046 | 8.327166824  | 8.28E-17 | 1.13E-14 |
| CASS4    | 187.3488037 | 1.216694658  | 0.146140465 | 8.325515174  | 8.40E-17 | 1.14E-14 |
| LDLRAP1  | 369.4280499 | 0.628240849  | 0.075748137 | 8.293812515  | 1.10E-16 | 1.48E-14 |
| ANKRD22  | 142.3760432 | 2.300348566  | 0.277712956 | 8.283187783  | 1.20E-16 | 1.60E-14 |
| PTX3     | 64.66898195 | 1.428395986  | 0.17253883  | 8.278692895  | 1.25E-16 | 1.65E-14 |
| ABTB1    | 549.6440272 | -0.640199691 | 0.077362957 | -8.275274359 | 1.28E-16 | 1.69E-14 |
| SLC7A11  | 4405.675767 | 0.878707082  | 0.106324707 | 8.264373397  | 1.40E-16 | 1.84E-14 |
| F3       | 158.873557  | 1.138511988  | 0.137948389 | 8.253173496  | 1.54E-16 | 2.01E-14 |
| DPEP2    | 452.3537472 | -0.719250878 | 0.08716624  | -8.251484513 | 1.56E-16 | 2.02E-14 |
| HLX      | 341.015413  | 0.844944349  | 0.102414802 | 8.25021709   | 1.58E-16 | 2.03E-14 |
| KCNA3    | 454.9022324 | 0.916856373  | 0.111226224 | 8.243167293  | 1.68E-16 | 2.14E-14 |
| PARP12   | 876.2908751 | 0.396919438  | 0.048393418 | 8.201930314  | 2.37E-16 | 2.98E-14 |
| SAMSN1   | 395.7386876 | 0.766038511  | 0.093395048 | 8.202131949  | 2.36E-16 | 2.98E-14 |
| NEURL3   | 33.12430547 | 1.790193145  | 0.218539856 | 8.191609415  | 2.58E-16 | 3.22E-14 |
| SLC5A3   | 1238.335323 | 1.293208597  | 0.158266332 | 8.171090987  | 3.06E-16 | 3.80E-14 |
| C19orf59 | 3569.118224 | 1.08688508   | 0.133122305 | 8.16456026   | 3.23E-16 | 3.98E-14 |
| APOL6    | 754.0408314 | 0.731547887  | 0.089671512 | 8.158085799  | 3.40E-16 | 4.18E-14 |
| SLAMF6   | 66.58798935 | -1.099014283 | 0.134817913 | -8.151841703 | 3.58E-16 | 4.37E-14 |
| TRIM25   | 1296.470512 | 0.689930155  | 0.084703491 | 8.145238749  | 3.79E-16 | 4.59E-14 |
| GPR84    | 240.7160625 | 0.961413744  | 0.118345339 | 8.123798972  | 4.52E-16 | 5.44E-14 |
| CDKN1A   | 5998.363369 | 0.746722517  | 0.092332709 | 8.087302165  | 6.10E-16 | 7.30E-14 |
| TNIP3    | 1723.128296 | 0.671065081  | 0.083098754 | 8.075513121  | 6.72E-16 | 7.99E-14 |
| PLAU     | 1321.776097 | 0.788972513  | 0.097810106 | 8.066370101  | 7.24E-16 | 8.56E-14 |
| SORL1    | 111.4978758 | -1.609952852 | 0.19970977  | -8.061462655 | 7.54E-16 | 8.86E-14 |
| BTN2A1   | 817.3406476 | 0.514529172  | 0.064165594 | 8.018770491  | 1.07E-15 | 1.25E-13 |
| SMAD7    | 806.9068596 | 0.610762381  | 0.076319291 | 8.002726104  | 1.22E-15 | 1.41E-13 |
| MB21D2   | 166.1704759 | 0.772640157  | 0.096820021 | 7.980169279  | 1.46E-15 | 1.69E-13 |
| CCL1     | 10.01244276 | 3.960066835  | 0.497651172 | 7.957515337  | 1.76E-15 | 2.01E-13 |
| CHST7    | 1051.658933 | -0.543001741 | 0.068292106 | -7.951164092 | 1.85E-15 | 2.11E-13 |
| CYP27A1  | 23302.04811 | -0.346861195 | 0.044034143 | -7.877096461 | 3.35E-15 | 3.80E-13 |
| DAPK1    | 4273.411614 | -0.449232214 | 0.057095353 | -7.868104735 | 3.60E-15 | 4.06E-13 |
| APOL1    | 1033.40213  | 1.149635015  | 0.146301391 | 7.857991012  | 3.90E-15 | 4.37E-13 |
| CXCR4    | 503.6992894 | -1.182535255 | 0.150559021 | -7.854296933 | 4.02E-15 | 4.45E-13 |
| EGR2     | 6430.274089 | 0.856909916  | 0.10909453  | 7.854746827  | 4.01E-15 | 4.45E-13 |
| PKIA     | 148.0856301 | 0.784779994  | 0.100081086 | 7.841441669  | 4.45E-15 | 4.88E-13 |
| RALGDS   | 849.7774338 | 0.585879086  | 0.074714751 | 7.841545097  | 4.45E-15 | 4.88E-13 |
| HMOX1    | 4725.324884 | -0.411035858 | 0.052428488 | -7.839933404 | 4.51E-15 | 4.91E-13 |
| BHLHE41  | 2918.623049 | -0.724718497 | 0.092463083 | -7.837922725 | 4.58E-15 | 4.94E-13 |
| STARD8   | 271.9404132 | 0.655727371  | 0.083663937 | 7.837634665  | 4.59E-15 | 4.94E-13 |
| CSF3     | 8.192933408 | 3.800688902  | 0.486128024 | 7.818288007  | 5.35E-15 | 5.73E-13 |
| CYP3A7   | 14.53148398 | 2.743879302  | 0.351414576 | 7.808097591  | 5.81E-15 | 6.18E-13 |
| TSC22D1  | 1781.016296 | 0.59197167   | 0.075850213 | 7.804482671  | 5.97E-15 | 6.32E-13 |
| CD36     | 1400.985254 | -0.513474059 | 0.06592173  | -7.789147211 | 6.75E-15 | 7.10E-13 |

|          |             |              |             |              |          |          |
|----------|-------------|--------------|-------------|--------------|----------|----------|
| UBD      | 655.4178825 | 2.354054524  | 0.302553806 | 7.780614492  | 7.22E-15 | 7.56E-13 |
| NFKBIZ   | 1244.027095 | 0.515985508  | 0.066327364 | 7.779376086  | 7.29E-15 | 7.59E-13 |
| CSRNP1   | 136.9476971 | 0.915586937  | 0.118033562 | 7.757005069  | 8.70E-15 | 9.01E-13 |
| SLC28A3  | 224.550812  | 0.983089407  | 0.126752852 | 7.755954944  | 8.77E-15 | 9.03E-13 |
| CCR7     | 102.9616604 | 1.000337997  | 0.129232889 | 7.740583745  | 9.90E-15 | 1.01E-12 |
| TMEM45B  | 59.25551738 | 1.586326775  | 0.20565773  | 7.713431322  | 1.22E-14 | 1.25E-12 |
| AMPD3    | 824.9104126 | 0.536457066  | 0.069755783 | 7.690503052  | 1.47E-14 | 1.49E-12 |
| SLAMF1   | 16.19907967 | 2.719368805  | 0.35407478  | 7.680210387  | 1.59E-14 | 1.60E-12 |
| PIK3IP1  | 62.58763328 | -1.075555797 | 0.140081494 | -7.67807202  | 1.62E-14 | 1.62E-12 |
| PLSCR1   | 1964.594083 | 0.525031121  | 0.068473818 | 7.66761856   | 1.75E-14 | 1.75E-12 |
| NT5E     | 51.45348143 | 1.225110899  | 0.160115363 | 7.651426301  | 1.99E-14 | 1.97E-12 |
| WNT5A    | 57.16615254 | 1.561503195  | 0.204685481 | 7.628793135  | 2.37E-14 | 2.34E-12 |
| VNN2     | 99.28632709 | -0.710027981 | 0.093106804 | -7.625951614 | 2.42E-14 | 2.38E-12 |
| LDLR     | 285.8708468 | 0.857430436  | 0.112629848 | 7.612817104  | 2.68E-14 | 2.62E-12 |
| CYB5R3   | 90.0290541  | 0.974141559  | 0.128056981 | 7.607094519  | 2.80E-14 | 2.73E-12 |
| SLC22A1  | 33.52470948 | 1.854861456  | 0.244292872 | 7.592777632  | 3.13E-14 | 3.03E-12 |
| BCL6     | 1233.692227 | 0.59749604   | 0.078705923 | 7.591500329  | 3.16E-14 | 3.05E-12 |
| TTYH2    | 302.8376628 | -1.141926239 | 0.150502673 | -7.587415019 | 3.26E-14 | 3.13E-12 |
| CCL17    | 27.36880212 | 2.26670547   | 0.298816333 | 7.585614372  | 3.31E-14 | 3.16E-12 |
| MATK     | 741.944356  | 0.66654044   | 0.088103135 | 7.565456534  | 3.87E-14 | 3.67E-12 |
| TMEM86A  | 305.0255181 | -0.669600011 | 0.088622753 | -7.555621915 | 4.17E-14 | 3.94E-12 |
| FERMT2   | 45.70415138 | 1.730873417  | 0.229329971 | 7.547523809  | 4.44E-14 | 4.17E-12 |
| EAF1     | 1169.94604  | 0.510176751  | 0.067711794 | 7.534533095  | 4.90E-14 | 4.58E-12 |
| ENPP4    | 2106.23619  | 0.821542394  | 0.109057262 | 7.533128736  | 4.95E-14 | 4.60E-12 |
| SERINC5  | 1576.556457 | -0.367732449 | 0.048818277 | -7.532679818 | 4.97E-14 | 4.60E-12 |
| ARRDC4   | 1200.461809 | 0.793980163  | 0.105444024 | 7.529873483  | 5.08E-14 | 4.68E-12 |
| N4BP1    | 533.0340521 | 0.754950807  | 0.100605072 | 7.504102805  | 6.19E-14 | 5.67E-12 |
| EHD1     | 2277.130177 | 0.455642537  | 0.060766725 | 7.498224377  | 6.47E-14 | 5.91E-12 |
| ADO      | 716.9003051 | 0.536866296  | 0.07176016  | 7.48139765   | 7.35E-14 | 6.68E-12 |
| STAT1    | 5168.896609 | 1.084570044  | 0.145357293 | 7.461407807  | 8.56E-14 | 7.74E-12 |
| PNPLA6   | 4102.736664 | 0.755968027  | 0.101473811 | 7.449883095  | 9.34E-14 | 8.41E-12 |
| CA13     | 82.13158125 | 0.80259779   | 0.107825083 | 7.44351657   | 9.80E-14 | 8.79E-12 |
| ITGA2    | 49.79368186 | 1.462619043  | 0.197310158 | 7.41279139   | 1.24E-13 | 1.10E-11 |
| CTNS     | 625.3175282 | 0.753328512  | 0.101643691 | 7.411463563  | 1.25E-13 | 1.11E-11 |
| NBN      | 1386.834673 | 0.536662008  | 0.072423953 | 7.41000717   | 1.26E-13 | 1.12E-11 |
| NFAM1    | 378.5780554 | -0.973861466 | 0.13150151  | -7.405705563 | 1.30E-13 | 1.15E-11 |
| LIMK2    | 316.899309  | 0.689876362  | 0.093210819 | 7.401247752  | 1.35E-13 | 1.18E-11 |
| ATP6V1B2 | 8375.346568 | 0.425226388  | 0.057521577 | 7.392467491  | 1.44E-13 | 1.26E-11 |
| RNASET2  | 1407.391052 | -0.521434352 | 0.070712791 | -7.37397496  | 1.66E-13 | 1.44E-11 |
| CCL22    | 3558.304694 | 0.811858233  | 0.11010845  | 7.373260049  | 1.67E-13 | 1.44E-11 |
| LYRM1    | 104.9937362 | 1.060670326  | 0.144143994 | 7.358408058  | 1.86E-13 | 1.60E-11 |
| MLLT4    | 410.7442541 | 0.789742107  | 0.107539185 | 7.343761295  | 2.08E-13 | 1.78E-11 |
| IRAK2    | 195.3092025 | 0.647755673  | 0.088296576 | 7.336135778  | 2.20E-13 | 1.87E-11 |
| GOS2     | 988.3754435 | 1.356846837  | 0.185189769 | 7.326791544  | 2.36E-13 | 2.00E-11 |
| METTL7A  | 39.1718659  | -1.23490815  | 0.168714584 | -7.319510378 | 2.49E-13 | 2.10E-11 |
| CXCL10   | 1262.698126 | 2.83285329   | 0.388002908 | 7.301113552  | 2.85E-13 | 2.40E-11 |
| OPN3     | 4116.363433 | -0.493806557 | 0.067874207 | -7.275319716 | 3.46E-13 | 2.89E-11 |

|          |             |              |             |              |          |          |
|----------|-------------|--------------|-------------|--------------|----------|----------|
| LRRC8C   | 545.1125858 | 0.75055238   | 0.103249839 | 7.269283801  | 3.61E-13 | 3.01E-11 |
| MOB3C    | 800.2237475 | 0.50192176   | 0.069092459 | 7.264494117  | 3.74E-13 | 3.11E-11 |
| RIPK2    | 1437.766902 | 0.838609073  | 0.115528995 | 7.258862376  | 3.90E-13 | 3.23E-11 |
| DYRK4    | 54.09130687 | -0.995584939 | 0.137369503 | -7.2474961   | 4.25E-13 | 3.50E-11 |
| NLRC5    | 283.3207475 | 0.935278548  | 0.129136528 | 7.242556111  | 4.40E-13 | 3.61E-11 |
| APBA1    | 66.5378528  | -0.933832642 | 0.129527424 | -7.209536149 | 5.61E-13 | 4.58E-11 |
| TGM2     | 11146.04339 | 0.739864602  | 0.102870314 | 7.192207069  | 6.38E-13 | 5.18E-11 |
| SMOX     | 119.1290431 | 1.313181081  | 0.183002028 | 7.175773389  | 7.19E-13 | 5.82E-11 |
| ID2      | 301.5841191 | 0.831627752  | 0.115970775 | 7.171011449  | 7.44E-13 | 6.00E-11 |
| FXYD6    | 228.3546024 | -0.909652717 | 0.127108402 | -7.156511299 | 8.28E-13 | 6.64E-11 |
| IFI35    | 1066.109675 | 0.78855813   | 0.110276109 | 7.150761281  | 8.63E-13 | 6.90E-11 |
| PI3      | 37.70799402 | 2.477698974  | 0.34682262  | 7.14399475   | 9.07E-13 | 7.22E-11 |
| SLC46A1  | 30.81370308 | -1.354715221 | 0.190196053 | -7.12273045  | 1.06E-12 | 8.39E-11 |
| ANKLE2   | 1638.422242 | 0.258791868  | 0.036382657 | 7.113055762  | 1.14E-12 | 8.96E-11 |
| DIRAS2   | 18.17361524 | 2.64416135   | 0.371932224 | 7.109255883  | 1.17E-12 | 9.14E-11 |
| DYRK3    | 145.4273563 | 0.720029122  | 0.101274306 | 7.109691996  | 1.16E-12 | 9.14E-11 |
| SCIMP    | 2365.258652 | 0.65484942   | 0.092164074 | 7.1052569    | 1.20E-12 | 9.37E-11 |
| PLEKHA7  | 31.18176927 | 1.7774044    | 0.250387463 | 7.098615792  | 1.26E-12 | 9.79E-11 |
| HSD17B4  | 2874.084744 | -0.335771033 | 0.047488575 | -7.070564514 | 1.54E-12 | 1.19E-10 |
| PQLC3    | 783.7105593 | -0.550937308 | 0.078071474 | -7.056832394 | 1.70E-12 | 1.31E-10 |
| SEMA4D   | 877.7415556 | 0.700937753  | 0.099364113 | 7.054234453  | 1.74E-12 | 1.33E-10 |
| SDC4     | 1863.734841 | 0.560921829  | 0.079596432 | 7.047072522  | 1.83E-12 | 1.40E-10 |
| SLC7A8   | 1136.236365 | 0.677242049  | 0.096356972 | 7.028469613  | 2.09E-12 | 1.59E-10 |
| SAMD1    | 232.0517837 | -0.578882139 | 0.08244844  | -7.021141186 | 2.20E-12 | 1.67E-10 |
| MPP1     | 3277.166127 | -0.436225096 | 0.062163266 | -7.01740951  | 2.26E-12 | 1.71E-10 |
| SLC27A1  | 159.8329987 | -0.855174168 | 0.122053699 | -7.006540356 | 2.44E-12 | 1.84E-10 |
| RPLPOP2  | 69.02091108 | 0.957621205  | 0.136706254 | 7.004955338  | 2.47E-12 | 1.85E-10 |
| GCH1     | 320.5811373 | 1.004647465  | 0.1435391   | 6.999120543  | 2.58E-12 | 1.92E-10 |
| TAP2     | 1292.833098 | 0.657454832  | 0.094000345 | 6.994174697  | 2.67E-12 | 1.98E-10 |
| ERMP1    | 441.7384846 | -0.48884703  | 0.069923374 | -6.991181964 | 2.73E-12 | 2.02E-10 |
| SPP1     | 1074.256079 | 0.615807709  | 0.088281452 | 6.975505013  | 3.05E-12 | 2.25E-10 |
| RHBDD2   | 1465.352774 | 0.833627753  | 0.119582331 | 6.971161604  | 3.14E-12 | 2.31E-10 |
| DNAJB5   | 238.3648114 | 0.761266227  | 0.109691737 | 6.940050792  | 3.92E-12 | 2.87E-10 |
| CYTIP    | 893.3669648 | -0.399444516 | 0.057563238 | -6.939229407 | 3.94E-12 | 2.88E-10 |
| MPND     | 132.9398583 | -0.585560775 | 0.084496253 | -6.930020624 | 4.21E-12 | 3.06E-10 |
| SLC41A2  | 506.4520012 | 0.73214493   | 0.105831727 | 6.918009867  | 4.58E-12 | 3.32E-10 |
| PSTPIP2  | 815.1099124 | 1.187456497  | 0.171780307 | 6.912646277  | 4.76E-12 | 3.43E-10 |
| SCARB1   | 524.7780493 | -0.960011118 | 0.138977196 | -6.907688071 | 4.93E-12 | 3.54E-10 |
| CLMN     | 150.4916957 | -0.698867818 | 0.101332757 | -6.896761102 | 5.32E-12 | 3.81E-10 |
| FAM129A  | 3132.574396 | 0.549243528  | 0.079656191 | 6.8951769    | 5.38E-12 | 3.84E-10 |
| CPNE8    | 214.2599879 | 0.556684618  | 0.080760623 | 6.893020336  | 5.46E-12 | 3.87E-10 |
| SOCS2    | 8.728950617 | 3.178367354  | 0.461112476 | 6.892824461  | 5.47E-12 | 3.87E-10 |
| SERPINF1 | 69.39349812 | -1.058944978 | 0.153836261 | -6.883584997 | 5.84E-12 | 4.12E-10 |
| FNIP2    | 2696.750497 | 0.551682063  | 0.080153206 | 6.882844618  | 5.87E-12 | 4.13E-10 |
| MICAL1   | 1107.367579 | -0.494637702 | 0.071937246 | -6.875961084 | 6.16E-12 | 4.31E-10 |
| RHOA     | 772.9906028 | 0.583911645  | 0.085215783 | 6.852153703  | 7.27E-12 | 5.08E-10 |
| SLC19A3  | 337.6956912 | 1.025533017  | 0.149692336 | 6.850938702  | 7.34E-12 | 5.10E-10 |

|          |             |              |             |              |          |          |
|----------|-------------|--------------|-------------|--------------|----------|----------|
| CRYL1    | 242.8708629 | -0.493342347 | 0.072070691 | -6.845256256 | 7.63E-12 | 5.29E-10 |
| IL15RA   | 467.0655212 | 0.817493477  | 0.119459905 | 6.84324569   | 7.74E-12 | 5.35E-10 |
| GPR68    | 242.8144155 | 0.907878518  | 0.132879137 | 6.832363153  | 8.35E-12 | 5.75E-10 |
| ANO5     | 634.4207868 | -0.49115306  | 0.071915534 | -6.829582369 | 8.52E-12 | 5.84E-10 |
| TP53BP2  | 1477.404074 | 0.346151692  | 0.050752488 | 6.820388619  | 9.08E-12 | 6.20E-10 |
| MPHOSPH  | 594.5728062 | 0.497371583  | 0.072932457 | 6.81961917   | 9.13E-12 | 6.21E-10 |
| KRT23    | 144.367949  | 1.080436932  | 0.158626786 | 6.811188427  | 9.68E-12 | 6.57E-10 |
| MMP12    | 243.3681758 | 1.599323537  | 0.234941318 | 6.807331929  | 9.94E-12 | 6.72E-10 |
| KANK1    | 78.23864976 | 0.841461222  | 0.123625041 | 6.806559709  | 1.00E-11 | 6.73E-10 |
| DUSP6    | 1618.851732 | 0.480850009  | 0.070687915 | 6.802435899  | 1.03E-11 | 6.91E-10 |
| TAP1     | 2676.9272   | 0.92791735   | 0.136422085 | 6.801811822  | 1.03E-11 | 6.91E-10 |
| PXN      | 259.1366425 | 0.74809912   | 0.110124206 | 6.793230578  | 1.10E-11 | 7.31E-10 |
| FAM105A  | 171.2814605 | -0.684245363 | 0.100984    | -6.775779923 | 1.24E-11 | 8.22E-10 |
| VOPP1    | 1842.130357 | -0.502539907 | 0.074176035 | -6.774963211 | 1.24E-11 | 8.24E-10 |
| EMR3     | 112.8847923 | 1.219945399  | 0.180265598 | 6.767488703  | 1.31E-11 | 8.65E-10 |
| CD97     | 3787.976755 | 0.54269329   | 0.080331178 | 6.755699426  | 1.42E-11 | 9.35E-10 |
| GBP1     | 3684.740953 | 1.09129027   | 0.161589813 | 6.753459576  | 1.44E-11 | 9.46E-10 |
| IL23A    | 15.83024036 | 2.528776364  | 0.375359782 | 6.736940095  | 1.62E-11 | 1.06E-09 |
| DUSP2    | 219.9843208 | 0.554743511  | 0.082386018 | 6.733466726  | 1.66E-11 | 1.08E-09 |
| HTRA4    | 199.5667877 | -0.613217361 | 0.091158382 | -6.72694433  | 1.73E-11 | 1.12E-09 |
| ITGA5    | 3902.80036  | 0.510383949  | 0.076035679 | 6.712427046  | 1.91E-11 | 1.24E-09 |
| CTPS2    | 103.929474  | -0.672527381 | 0.100214869 | -6.710854247 | 1.93E-11 | 1.25E-09 |
| ACP5     | 13996.76343 | -0.488058084 | 0.072800635 | -6.704036044 | 2.03E-11 | 1.30E-09 |
| SLAMF8   | 5377.814632 | 0.507484291  | 0.075915189 | 6.684884777  | 2.31E-11 | 1.48E-09 |
| PDCD4    | 1020.439082 | -0.4896687   | 0.073283885 | -6.681805998 | 2.36E-11 | 1.51E-09 |
| SAMD9L   | 364.4766358 | 0.840191063  | 0.126130899 | 6.661262769  | 2.71E-11 | 1.73E-09 |
| YRDC     | 219.3869652 | 0.51476668   | 0.077364705 | 6.653766488  | 2.86E-11 | 1.81E-09 |
| FBXO6    | 168.2185518 | 0.821917729  | 0.123577796 | 6.651014602  | 2.91E-11 | 1.84E-09 |
| ADAMTSL4 | 761.9307313 | 0.825494874  | 0.124275927 | 6.642435875  | 3.09E-11 | 1.94E-09 |
| HAPLN3   | 72.47387495 | 1.840712883  | 0.277126829 | 6.642131662  | 3.09E-11 | 1.94E-09 |
| CERK     | 516.3637558 | -0.586537709 | 0.088391145 | -6.635706669 | 3.23E-11 | 2.02E-09 |
| PTPN7    | 182.6455356 | 0.746186137  | 0.112491459 | 6.63326927   | 3.28E-11 | 2.05E-09 |
| LMNB1    | 67.8836423  | 1.23961294   | 0.186971974 | 6.629939824  | 3.36E-11 | 2.09E-09 |
| TJP1     | 212.4942891 | 0.451934659  | 0.068266857 | 6.620118117  | 3.59E-11 | 2.22E-09 |
| KLF13    | 1185.178543 | -0.427905539 | 0.064780009 | -6.605518391 | 3.96E-11 | 2.45E-09 |
| NR3C2    | 32.96190053 | -0.816971261 | 0.124138633 | -6.581120177 | 4.67E-11 | 2.87E-09 |
| IL32     | 1009.453207 | 0.775883092  | 0.118051069 | 6.572435952  | 4.95E-11 | 3.04E-09 |
| MTF1     | 1109.075961 | 0.58467738   | 0.089137728 | 6.559258258  | 5.41E-11 | 3.30E-09 |
| NLRP3    | 94.70526072 | 0.74653189   | 0.113817553 | 6.55902248   | 5.42E-11 | 3.30E-09 |
| IMPA2    | 98.4881385  | -0.826238504 | 0.126185282 | -6.547819927 | 5.84E-11 | 3.54E-09 |
| MFSD2A   | 345.2465704 | 0.873659696  | 0.133426824 | 6.547856497  | 5.84E-11 | 3.54E-09 |
| ANGEL1   | 469.6439437 | -0.5648584   | 0.086275242 | -6.54716681  | 5.86E-11 | 3.54E-09 |
| ATP6VOD2 | 490.8998773 | -0.531454065 | 0.08141797  | -6.527478662 | 6.69E-11 | 4.03E-09 |
| B3GNT5   | 804.7518749 | 0.579884081  | 0.089110535 | 6.507469433  | 7.64E-11 | 4.59E-09 |
| TSFM     | 304.3834327 | 0.664266698  | 0.102167271 | 6.50175629   | 7.94E-11 | 4.75E-09 |
| ZDHHC3   | 407.6594637 | 0.315136447  | 0.04866646  | 6.475433977  | 9.45E-11 | 5.64E-09 |
| CTSF     | 58.35824335 | -0.958572592 | 0.148133971 | -6.470984232 | 9.74E-11 | 5.79E-09 |

|           |             |              |             |              |          |          |
|-----------|-------------|--------------|-------------|--------------|----------|----------|
| PSME4     | 1433.952691 | 0.637853944  | 0.098668146 | 6.464638982  | 1.02E-10 | 6.02E-09 |
| PCMTD2    | 185.2341658 | -0.538075444 | 0.083361222 | -6.454745169 | 1.08E-10 | 6.41E-09 |
| C15orf52  | 33.7504192  | -1.005351342 | 0.155810227 | -6.452409191 | 1.10E-10 | 6.49E-09 |
| SIPA1L1   | 163.4565388 | 0.72766712   | 0.112902862 | 6.445072379  | 1.16E-10 | 6.79E-09 |
| PDLIM4    | 94.75079859 | 0.81532209   | 0.126813266 | 6.429312293  | 1.28E-10 | 7.51E-09 |
| USP32     | 1300.671153 | 0.382029848  | 0.059528388 | 6.417607799  | 1.38E-10 | 8.08E-09 |
| SLC4A11   | 66.96429417 | -0.582538665 | 0.09099067  | -6.402180203 | 1.53E-10 | 8.92E-09 |
| NEDD4L    | 216.1290598 | 0.559620668  | 0.087567598 | 6.390727661  | 1.65E-10 | 9.58E-09 |
| METTL9    | 439.6719515 | 0.707417915  | 0.111106354 | 6.367033819  | 1.93E-10 | 1.11E-08 |
| HSD17B14  | 114.8814947 | -0.56888449  | 0.089439903 | -6.360522186 | 2.01E-10 | 1.16E-08 |
| CEP170    | 1095.699715 | 0.520324502  | 0.081818344 | 6.35950907   | 2.02E-10 | 1.16E-08 |
| BTD       | 187.8202984 | -0.571911699 | 0.090078533 | -6.349034337 | 2.17E-10 | 1.24E-08 |
| ASAH1     | 8939.08205  | -0.375586584 | 0.059231455 | -6.340998831 | 2.28E-10 | 1.31E-08 |
| ACSF2     | 222.8337915 | -0.597770996 | 0.094311221 | -6.338280716 | 2.32E-10 | 1.32E-08 |
| ITGA1     | 72.76062137 | 1.069818479  | 0.168930117 | 6.332905552  | 2.41E-10 | 1.37E-08 |
| CCDC71L   | 410.4747232 | 0.865657338  | 0.13691866  | 6.322420471  | 2.57E-10 | 1.46E-08 |
| KLHL24    | 204.2891115 | -0.510764486 | 0.080987176 | -6.306732849 | 2.85E-10 | 1.61E-08 |
| NDP       | 34.67706067 | 1.958219641  | 0.310535708 | 6.305940312  | 2.86E-10 | 1.61E-08 |
| CHST3     | 85.89771149 | 0.687877145  | 0.109110144 | 6.304428899  | 2.89E-10 | 1.62E-08 |
| ME1       | 639.4307693 | -0.728043337 | 0.115519874 | -6.302321064 | 2.93E-10 | 1.64E-08 |
| NFIA      | 88.79914361 | -0.749886516 | 0.119182705 | -6.291907177 | 3.14E-10 | 1.75E-08 |
| LCP2      | 1428.484459 | 0.505960197  | 0.080673872 | 6.271673685  | 3.57E-10 | 1.99E-08 |
| RGCC      | 4769.565172 | 0.499723444  | 0.079764452 | 6.26498939   | 3.73E-10 | 2.07E-08 |
| ACACB     | 86.99577344 | -0.560713031 | 0.089563139 | -6.260533467 | 3.84E-10 | 2.12E-08 |
| TNFRSF11E | 4.931680335 | 3.791262035  | 0.605812679 | 6.258142436  | 3.90E-10 | 2.15E-08 |
| PLEKHN1   | 22.42064868 | 1.145170199  | 0.183188925 | 6.251306947  | 4.07E-10 | 2.24E-08 |
| KIAA0513  | 1146.07506  | -0.410815014 | 0.065877303 | -6.236062989 | 4.49E-10 | 2.46E-08 |
| ARHGAP1C  | 824.5895915 | 0.478362718  | 0.076722593 | 6.234965474  | 4.52E-10 | 2.47E-08 |
| CLEC7A    | 164.6860348 | 0.6318478    | 0.101347647 | 6.234459494  | 4.53E-10 | 2.47E-08 |
| PLTP      | 501.0534685 | -0.752749516 | 0.120763412 | -6.233258113 | 4.57E-10 | 2.49E-08 |
| NR4A2     | 78.58223153 | 0.602257461  | 0.096647084 | 6.231511978  | 4.62E-10 | 2.51E-08 |
| SUCNR1    | 134.4749944 | 0.838628108  | 0.134934061 | 6.215095745  | 5.13E-10 | 2.78E-08 |
| SAV1      | 704.8982411 | 0.649145771  | 0.104609541 | 6.205416481  | 5.46E-10 | 2.94E-08 |
| CH25H     | 64.60340734 | 2.064510867  | 0.332770806 | 6.204002359  | 5.50E-10 | 2.96E-08 |
| TEC       | 132.4568504 | 0.552981697  | 0.089137964 | 6.203660848  | 5.52E-10 | 2.96E-08 |
| CKAP4     | 331.4210594 | 0.523601882  | 0.084423492 | 6.202087444  | 5.57E-10 | 2.98E-08 |
| SGK110    | 19.81876487 | 1.263914132  | 0.203856496 | 6.200018919  | 5.65E-10 | 3.01E-08 |
| RASSF5    | 1203.826244 | 0.435132738  | 0.070203873 | 6.198130054  | 5.71E-10 | 3.04E-08 |
| RHOH      | 32.16830838 | 1.184418531  | 0.191187111 | 6.195075218  | 5.83E-10 | 3.08E-08 |
| SBNO2     | 743.0019975 | 0.468495905  | 0.075620561 | 6.195350831  | 5.82E-10 | 3.08E-08 |
| LYN       | 2014.726634 | 0.340849371  | 0.05503424  | 6.19340558   | 5.89E-10 | 3.11E-08 |
| FABP4     | 12133.92014 | -0.741713022 | 0.119984649 | -6.181732626 | 6.34E-10 | 3.34E-08 |
| SUMO3     | 1170.344746 | -0.249204945 | 0.040381096 | -6.171326901 | 6.77E-10 | 3.55E-08 |
| MAP7      | 710.1697558 | 0.545885664  | 0.088561352 | 6.163926521  | 7.10E-10 | 3.72E-08 |
| INSR      | 132.6103925 | -0.476946537 | 0.07758993  | -6.147015927 | 7.90E-10 | 4.12E-08 |
| ALAS1     | 2537.386398 | 0.527146519  | 0.085977055 | 6.131246546  | 8.72E-10 | 4.54E-08 |
| SASH3     | 333.8810468 | -0.663205276 | 0.108204007 | -6.129211797 | 8.83E-10 | 4.59E-08 |

|          |             |              |             |              |          |          |
|----------|-------------|--------------|-------------|--------------|----------|----------|
| RCN1     | 954.0992289 | 0.377524358  | 0.061608976 | 6.127749312  | 8.91E-10 | 4.62E-08 |
| LAP3     | 4477.401672 | 0.661641863  | 0.107985348 | 6.127144795  | 8.95E-10 | 4.62E-08 |
| WDR91    | 247.9575145 | -0.546112178 | 0.089262805 | -6.118026182 | 9.47E-10 | 4.88E-08 |
| SEMA4A   | 425.3147935 | -0.530954744 | 0.08684865  | -6.113563576 | 9.74E-10 | 5.01E-08 |
| ASAP2    | 36.66956201 | 1.470150423  | 0.240655143 | 6.108950774  | 1.00E-09 | 5.14E-08 |
| TTC39B   | 850.2495784 | 0.636589042  | 0.104490177 | 6.092333864  | 1.11E-09 | 5.69E-08 |
| IRF7     | 721.3731824 | 0.64423775   | 0.105871976 | 6.085064007  | 1.16E-09 | 5.93E-08 |
| KBTBD8   | 128.5221541 | 0.606887871  | 0.099772163 | 6.082737433  | 1.18E-09 | 6.01E-08 |
| SIRPB2   | 56.6148566  | -0.936459961 | 0.154324409 | -6.068126025 | 1.29E-09 | 6.56E-08 |
| EIF1B    | 4105.995221 | 0.558876052  | 0.092192219 | 6.062074007  | 1.34E-09 | 6.80E-08 |
| CBX6     | 98.96186532 | 0.639450986  | 0.105581079 | 6.05649223   | 1.39E-09 | 7.02E-08 |
| HS3ST3A1 | 37.55724168 | 1.151467527  | 0.190376273 | 6.048377296  | 1.46E-09 | 7.34E-08 |
| PDK4     | 987.2668638 | -0.595184908 | 0.098402149 | -6.048495003 | 1.46E-09 | 7.34E-08 |
| SDS      | 30.44329127 | -1.503746344 | 0.248725451 | -6.045808089 | 1.49E-09 | 7.44E-08 |
| IFIT3    | 138.9877153 | 1.444978932  | 0.239164633 | 6.041775135  | 1.52E-09 | 7.61E-08 |
| VAT1     | 18214.39702 | -0.39903987  | 0.066131458 | -6.034040103 | 1.60E-09 | 7.96E-08 |
| EIF4EBP1 | 475.0347666 | -0.473243896 | 0.078440152 | -6.033184302 | 1.61E-09 | 7.98E-08 |
| PTGFRN   | 77.61756738 | -0.993596721 | 0.164760542 | -6.030550195 | 1.63E-09 | 8.09E-08 |
| ZC3H12A  | 565.4799209 | 0.491138677  | 0.081462874 | 6.028987863  | 1.65E-09 | 8.15E-08 |
| SLC27A3  | 702.6120821 | 0.633983274  | 0.105342569 | 6.018300879  | 1.76E-09 | 8.68E-08 |
| CAMK1    | 155.685841  | 0.635284487  | 0.105690251 | 6.010814415  | 1.85E-09 | 9.07E-08 |
| CCDC69   | 503.4811382 | -0.647235588 | 0.107796219 | -6.004251281 | 1.92E-09 | 9.42E-08 |
| CD80     | 703.8998354 | 0.552799266  | 0.09230069  | 5.989113066  | 2.11E-09 | 1.03E-07 |
| ADAMTSL1 | 8.040782643 | 2.609912632  | 0.435959589 | 5.98659302   | 2.14E-09 | 1.05E-07 |
| MTHFD2   | 4181.957525 | 0.339322694  | 0.05677005  | 5.977142743  | 2.27E-09 | 1.10E-07 |
| AQP3     | 1200.819704 | 0.575414155  | 0.096291954 | 5.975724152  | 2.29E-09 | 1.11E-07 |
| HIP1     | 532.3029625 | 0.712734585  | 0.119303291 | 5.974140178  | 2.31E-09 | 1.12E-07 |
| MAP3K5   | 492.1963158 | 0.564827845  | 0.094781255 | 5.95927795   | 2.53E-09 | 1.22E-07 |
| TMEM171  | 13.77930664 | 2.072354475  | 0.347921179 | 5.956390695  | 2.58E-09 | 1.24E-07 |
| FAM40B   | 95.79990112 | 0.75843075   | 0.127513487 | 5.94784733   | 2.72E-09 | 1.31E-07 |
| METTL21B | 145.2546008 | 0.728440474  | 0.122666133 | 5.938399275  | 2.88E-09 | 1.38E-07 |
| NCF4     | 1196.540062 | -0.351987327 | 0.059287846 | -5.936922192 | 2.90E-09 | 1.39E-07 |
| PLXND1   | 1509.891903 | -0.436850761 | 0.07358318  | -5.936829026 | 2.91E-09 | 1.39E-07 |
| GCHFR    | 111.3707821 | -0.765346254 | 0.128929146 | -5.936177176 | 2.92E-09 | 1.39E-07 |
| MERTK    | 13.20209715 | -1.802154918 | 0.303889592 | -5.930294968 | 3.02E-09 | 1.43E-07 |
| PIK3AP1  | 5194.732343 | 0.338748819  | 0.05713556  | 5.928861428  | 3.05E-09 | 1.44E-07 |
| FYB      | 635.0122973 | -0.661312455 | 0.111929539 | -5.908292494 | 3.46E-09 | 1.63E-07 |
| TMEM170  | 166.5142858 | -0.488737907 | 0.082721102 | -5.908261571 | 3.46E-09 | 1.63E-07 |
| SLCO2B1  | 2467.023782 | 0.622443831  | 0.105384123 | 5.906428901  | 3.50E-09 | 1.64E-07 |
| CD47     | 1741.300853 | 0.42558707   | 0.072224617 | 5.892548651  | 3.80E-09 | 1.78E-07 |
| JAKMIP2  | 787.7240298 | 0.47914997   | 0.081309824 | 5.892891482  | 3.79E-09 | 1.78E-07 |
| EML4     | 2026.709319 | 0.58590863   | 0.099517252 | 5.887508122  | 3.92E-09 | 1.83E-07 |
| YES1     | 55.4523088  | 0.830488963  | 0.141134888 | 5.884363367  | 4.00E-09 | 1.86E-07 |
| SLIT3    | 62.36436815 | -0.961838429 | 0.163648444 | -5.877467608 | 4.17E-09 | 1.93E-07 |
| TSPAN4   | 212.1603511 | -0.712745522 | 0.121313091 | -5.875256475 | 4.22E-09 | 1.96E-07 |
| LTV1     | 276.0914399 | 0.331962241  | 0.056577542 | 5.86738534   | 4.43E-09 | 2.05E-07 |
| TNFSF15  | 88.44038134 | 1.263277104  | 0.215414036 | 5.864414067  | 4.51E-09 | 2.08E-07 |

|          |             |              |             |              |          |          |
|----------|-------------|--------------|-------------|--------------|----------|----------|
| BRI3BP   | 81.66300415 | -0.600590925 | 0.102491074 | -5.859933973 | 4.63E-09 | 2.12E-07 |
| STON2    | 194.4719178 | 0.728051863  | 0.124241644 | 5.85996644   | 4.63E-09 | 2.12E-07 |
| SLC25A25 | 237.4825861 | 0.447736597  | 0.076438665 | 5.857462277  | 4.70E-09 | 2.15E-07 |
| GEM      | 229.7454645 | 0.596096274  | 0.101815843 | 5.854651481  | 4.78E-09 | 2.18E-07 |
| PDE1B    | 373.6837601 | 0.642713487  | 0.109863228 | 5.85012381   | 4.91E-09 | 2.24E-07 |
| ENTPD7   | 183.5291227 | 0.547147453  | 0.09370901  | 5.838792389  | 5.26E-09 | 2.39E-07 |
| NEK6     | 135.0684334 | 0.753976634  | 0.129244586 | 5.833719305  | 5.42E-09 | 2.46E-07 |
| GALNT2   | 1105.189462 | 0.334026396  | 0.057395225 | 5.81975928   | 5.89E-09 | 2.67E-07 |
| GSTK1    | 1100.566853 | -0.406391334 | 0.069858337 | -5.817363447 | 5.98E-09 | 2.70E-07 |
| SLC48A1  | 114.4860538 | -0.817628291 | 0.140573657 | -5.816369211 | 6.01E-09 | 2.71E-07 |
| CD93     | 28.12781885 | 1.125895345  | 0.193649361 | 5.814092733  | 6.10E-09 | 2.74E-07 |
| PPT1     | 5885.720174 | -0.232274869 | 0.039988022 | -5.808611142 | 6.30E-09 | 2.82E-07 |
| EBI3     | 21.63758476 | 1.739378183  | 0.299699106 | 5.803748317  | 6.48E-09 | 2.90E-07 |
| DCAF7    | 753.8559339 | 0.354206608  | 0.061082635 | 5.798810179  | 6.68E-09 | 2.98E-07 |
| PPP1R15B | 1262.475436 | 0.373075786  | 0.064353703 | 5.79726988   | 6.74E-09 | 3.00E-07 |
| BNIP3L   | 1055.703886 | -0.484789517 | 0.083705874 | -5.79158298  | 6.97E-09 | 3.10E-07 |
| PPFIBP1  | 123.5055521 | 0.624715265  | 0.107941938 | 5.787512028  | 7.14E-09 | 3.16E-07 |
| ARL5B    | 250.625536  | 0.490859093  | 0.084844454 | 5.785399838  | 7.23E-09 | 3.19E-07 |
| RBPJ     | 1143.795165 | 0.410942508  | 0.071028331 | 5.785614006  | 7.22E-09 | 3.19E-07 |
| ALDH1A2  | 383.4328011 | 0.892938701  | 0.154803392 | 5.768211482  | 8.01E-09 | 3.52E-07 |
| CD9      | 9661.791192 | -0.425153612 | 0.073748054 | -5.764946834 | 8.17E-09 | 3.58E-07 |
| MICAL2   | 210.5735555 | 1.027250288  | 0.178615073 | 5.751195968  | 8.86E-09 | 3.88E-07 |
| DOT1L    | 498.9049204 | 0.455102679  | 0.079137911 | 5.750754243  | 8.88E-09 | 3.88E-07 |
| PBXIP1   | 179.3315481 | -0.598430186 | 0.104294169 | -5.737906487 | 9.59E-09 | 4.18E-07 |
| SPATS2L  | 246.5279954 | 0.469300982  | 0.081874522 | 5.73195383   | 9.93E-09 | 4.32E-07 |
| GUCY1B3  | 14.67200552 | 1.292418264  | 0.225675418 | 5.726889854  | 1.02E-08 | 4.44E-07 |
| RBMS1    | 1233.467556 | 0.59470634   | 0.103875965 | 5.725158271  | 1.03E-08 | 4.47E-07 |
| CUEDC1   | 261.6716346 | -0.335934451 | 0.058689745 | -5.72390374  | 1.04E-08 | 4.50E-07 |
| FBXO10   | 141.7011098 | -0.521151609 | 0.091104209 | -5.720390012 | 1.06E-08 | 4.58E-07 |
| SBSN     | 4.822356375 | 2.736595206  | 0.478464548 | 5.719535993  | 1.07E-08 | 4.59E-07 |
| OSBPL1A  | 502.6643853 | -0.431350211 | 0.075432211 | -5.718382182 | 1.08E-08 | 4.61E-07 |
| ATP2C1   | 981.4978093 | 0.454714721  | 0.079586141 | 5.713491248  | 1.11E-08 | 4.74E-07 |
| IFI44    | 293.1977069 | 0.920225975  | 0.161109039 | 5.711820884  | 1.12E-08 | 4.77E-07 |
| C7orf41  | 50.06598937 | -0.655692035 | 0.114849628 | -5.709135062 | 1.14E-08 | 4.83E-07 |
| NPAS2    | 72.25399026 | 0.897480151  | 0.157193254 | 5.709406279  | 1.13E-08 | 4.83E-07 |
| NRIP3    | 584.911305  | 0.451306408  | 0.079149841 | 5.701924382  | 1.18E-08 | 5.03E-07 |
| STEAP3   | 899.1482994 | -0.498408518 | 0.087460626 | -5.698661655 | 1.21E-08 | 5.11E-07 |
| CD101    | 295.4131788 | -0.620575615 | 0.10905169  | -5.690655626 | 1.27E-08 | 5.35E-07 |
| BMP2     | 9.808725736 | 2.437510115  | 0.428575519 | 5.687469319  | 1.29E-08 | 5.44E-07 |
| GIMAP8   | 181.7903536 | 0.821672124  | 0.144507717 | 5.686008615  | 1.30E-08 | 5.47E-07 |
| SPOCD1   | 1394.305359 | 0.471916328  | 0.083007391 | 5.685232654  | 1.31E-08 | 5.48E-07 |
| ANXA11   | 4008.358647 | 0.389335455  | 0.068507947 | 5.683069956  | 1.32E-08 | 5.54E-07 |
| PHLDA2   | 449.0764474 | 0.542637546  | 0.095536666 | 5.679887822  | 1.35E-08 | 5.63E-07 |
| DBNDD2   | 1430.928321 | -0.319988398 | 0.056342332 | -5.67936024  | 1.35E-08 | 5.64E-07 |
| KLF9     | 488.3005999 | 0.34487031   | 0.060755732 | 5.676341924  | 1.38E-08 | 5.73E-07 |
| SLC37A2  | 611.888622  | -0.421378652 | 0.074273853 | -5.673310804 | 1.40E-08 | 5.82E-07 |
| DUSP4    | 46.82833946 | 0.95129257   | 0.167936435 | 5.664599044  | 1.47E-08 | 6.11E-07 |

|          |             |              |             |              |          |          |
|----------|-------------|--------------|-------------|--------------|----------|----------|
| RPGR     | 126.8063105 | 0.524476258  | 0.092607297 | 5.663444154  | 1.48E-08 | 6.13E-07 |
| HEG1     | 494.5825755 | 0.47542592   | 0.084256333 | 5.642613465  | 1.67E-08 | 6.91E-07 |
| NTAN1    | 783.6012603 | -0.28514888  | 0.050591445 | -5.636306342 | 1.74E-08 | 7.15E-07 |
| MPP7     | 28.90421226 | -0.970638502 | 0.172294632 | -5.633596887 | 1.76E-08 | 7.25E-07 |
| RAPGEF3  | 40.15430517 | -0.999258873 | 0.177396246 | -5.632920055 | 1.77E-08 | 7.25E-07 |
| WBP1     | 270.1767489 | -0.386441065 | 0.068605058 | -5.632836363 | 1.77E-08 | 7.25E-07 |
| GBP5     | 1000.368692 | 1.660166837  | 0.294759643 | 5.632273198  | 1.78E-08 | 7.26E-07 |
| RRAD     | 163.0125154 | 0.966498598  | 0.171641874 | 5.630902143  | 1.79E-08 | 7.30E-07 |
| IQGAP2   | 2028.815398 | 0.354414494  | 0.062974537 | 5.627901577  | 1.82E-08 | 7.41E-07 |
| USP12    | 1121.331903 | 0.359998058  | 0.063987995 | 5.626025018  | 1.84E-08 | 7.48E-07 |
| TNFRSF4  | 114.4549642 | 0.971531805  | 0.172948526 | 5.617462193  | 1.94E-08 | 7.84E-07 |
| SMPDL3A  | 40.09868041 | -0.991401911 | 0.176521216 | -5.616332883 | 1.95E-08 | 7.88E-07 |
| PNPLA3   | 120.1211707 | -0.597221117 | 0.106416744 | -5.61209727  | 2.00E-08 | 8.06E-07 |
| KREMEN1  | 30.74954315 | 1.391647902  | 0.248426898 | 5.601840672  | 2.12E-08 | 8.53E-07 |
| IMPDH1   | 468.0700583 | -0.476812592 | 0.085254752 | -5.592797816 | 2.23E-08 | 8.97E-07 |
| TNFAIP8  | 1064.599739 | 0.466222404  | 0.08342047  | 5.588824934  | 2.29E-08 | 9.16E-07 |
| LTA4H    | 5397.793789 | -0.525706495 | 0.094077555 | -5.588011902 | 2.30E-08 | 9.18E-07 |
| HDAC5    | 282.273404  | -0.39911553  | 0.071522206 | -5.580302296 | 2.40E-08 | 9.58E-07 |
| AICDA    | 29.62689358 | -1.252791733 | 0.224536934 | -5.579446155 | 2.41E-08 | 9.60E-07 |
| FABP5    | 4614.615079 | -0.405373263 | 0.072758106 | -5.571520263 | 2.53E-08 | 1.00E-06 |
| JUNB     | 3376.545444 | 0.373363793  | 0.067014564 | 5.571382869  | 2.53E-08 | 1.00E-06 |
| CYFIP1   | 1684.416591 | -0.273725195 | 0.049233902 | -5.559689199 | 2.70E-08 | 1.07E-06 |
| PGAP1    | 53.88604662 | 0.997780719  | 0.179663746 | 5.553600786  | 2.80E-08 | 1.10E-06 |
| LG MN    | 1588.503697 | -0.455469481 | 0.082051515 | -5.551018534 | 2.84E-08 | 1.12E-06 |
| HS3ST3B1 | 55.85761899 | 1.057182568  | 0.190487319 | 5.549884224  | 2.86E-08 | 1.12E-06 |
| MST4     | 38.38670955 | 1.196598177  | 0.215605671 | 5.54993832   | 2.86E-08 | 1.12E-06 |
| SIK3     | 744.9755172 | 0.441013549  | 0.079606214 | 5.539938712  | 3.03E-08 | 1.18E-06 |
| BTG1     | 1954.688656 | 0.470442698  | 0.084992765 | 5.535091136  | 3.11E-08 | 1.22E-06 |
| PARP1    | 967.4342465 | -0.307278548 | 0.055527124 | -5.533845948 | 3.13E-08 | 1.22E-06 |
| PDSS1    | 175.8593555 | 0.570532552  | 0.10332204  | 5.521886265  | 3.35E-08 | 1.31E-06 |
| FCN1     | 42.51372094 | -0.898750715 | 0.162945893 | -5.515638955 | 3.48E-08 | 1.35E-06 |
| ELMO2    | 587.0225193 | 0.40832425   | 0.074047391 | 5.514363744  | 3.50E-08 | 1.36E-06 |
| MDGA1    | 12.67023441 | 1.394440969  | 0.252991244 | 5.511815134  | 3.55E-08 | 1.37E-06 |
| CXCL9    | 597.6961654 | 1.770043691  | 0.321781234 | 5.500767299  | 3.78E-08 | 1.46E-06 |
| PDK2     | 117.0524076 | -0.896802677 | 0.163118401 | -5.497863332 | 3.84E-08 | 1.48E-06 |
| PLK3     | 579.6857793 | 0.590900783  | 0.107521891 | 5.495632352  | 3.89E-08 | 1.50E-06 |
| FKBP9    | 136.3580694 | -0.480965496 | 0.087789168 | -5.478642829 | 4.29E-08 | 1.64E-06 |
| SNX8     | 1307.604316 | 0.299737802  | 0.054712123 | 5.478453168  | 4.29E-08 | 1.64E-06 |
| WSB1     | 879.7851647 | 0.284550813  | 0.051973004 | 5.47497334   | 4.38E-08 | 1.67E-06 |
| OR6N1    | 61.95414116 | -0.940852021 | 0.171946966 | -5.471757024 | 4.46E-08 | 1.70E-06 |
| PMP22    | 589.9259846 | 0.555970965  | 0.101613736 | 5.471415454  | 4.46E-08 | 1.70E-06 |
| CIITA    | 1200.784206 | 0.553846757  | 0.101233485 | 5.470983826  | 4.48E-08 | 1.70E-06 |
| CYP2U1   | 27.06739532 | -1.013630424 | 0.185410285 | -5.466958983 | 4.58E-08 | 1.73E-06 |
| GATSL3   | 17.8751491  | -0.985629154 | 0.18027923  | -5.467236305 | 4.57E-08 | 1.73E-06 |
| HES2     | 47.85058451 | -1.074212264 | 0.196604553 | -5.4638219   | 4.66E-08 | 1.76E-06 |
| PLA2G16  | 2768.53468  | -0.309366506 | 0.056626386 | -5.46329243  | 4.67E-08 | 1.76E-06 |
| PARP9    | 277.8720816 | 0.868576819  | 0.159131544 | 5.458231581  | 4.81E-08 | 1.81E-06 |

|           |             |              |             |              |          |          |
|-----------|-------------|--------------|-------------|--------------|----------|----------|
| NIPSNAP1  | 57.3297248  | -0.728581021 | 0.133531757 | -5.456237793 | 4.86E-08 | 1.83E-06 |
| AFMID     | 13.61298987 | -1.467593263 | 0.269833518 | -5.438884211 | 5.36E-08 | 2.00E-06 |
| JAK3      | 86.2108141  | 0.962842178  | 0.177036198 | 5.438674061  | 5.37E-08 | 2.00E-06 |
| PCYOX1    | 215.9030429 | -0.476639518 | 0.087630535 | -5.439194433 | 5.35E-08 | 2.00E-06 |
| SORD      | 98.413807   | -0.54171588  | 0.099588396 | -5.439548189 | 5.34E-08 | 2.00E-06 |
| AUH       | 91.90883189 | -0.755065314 | 0.138853189 | -5.437868012 | 5.39E-08 | 2.01E-06 |
| OTUD7B    | 69.67942755 | 0.731174718  | 0.134474742 | 5.437264346  | 5.41E-08 | 2.01E-06 |
| MFAF5     | 68.59914337 | -0.628030654 | 0.115520663 | -5.436522227 | 5.43E-08 | 2.01E-06 |
| PDGFB     | 53.9438127  | 0.752897989  | 0.138709284 | 5.42788463   | 5.70E-08 | 2.11E-06 |
| CCDC28A   | 272.2106726 | -0.381308333 | 0.070254573 | -5.427523327 | 5.71E-08 | 2.11E-06 |
| FMO5      | 75.02751769 | -0.597265014 | 0.110119376 | -5.423795855 | 5.83E-08 | 2.15E-06 |
| PPAP2B    | 1839.090467 | 0.459334585  | 0.084687145 | 5.42389975   | 5.83E-08 | 2.15E-06 |
| RASGRP1   | 204.8939852 | 0.816842393  | 0.150658778 | 5.421804194  | 5.90E-08 | 2.17E-06 |
| SERPINB9  | 138.728803  | 1.114632248  | 0.205690115 | 5.418987927  | 5.99E-08 | 2.20E-06 |
| ANKRD12   | 2735.091531 | 0.39667685   | 0.073280693 | 5.413115416  | 6.19E-08 | 2.26E-06 |
| EPB41L3   | 3372.274746 | -0.21829404  | 0.040341962 | -5.411091283 | 6.26E-08 | 2.29E-06 |
| ALDH1B1   | 15.40143628 | -0.887265279 | 0.164069631 | -5.407858085 | 6.38E-08 | 2.32E-06 |
| LDHB      | 1043.524569 | -0.422163999 | 0.078119584 | -5.40407381  | 6.51E-08 | 2.37E-06 |
| OR6K3     | 88.24812287 | -0.972291784 | 0.179990233 | -5.401914132 | 6.59E-08 | 2.39E-06 |
| MT2A      | 11714.87947 | 0.47990035   | 0.088896369 | 5.39842465   | 6.72E-08 | 2.43E-06 |
| SHPK      | 163.6939667 | 0.511558885  | 0.094805874 | 5.395856444  | 6.82E-08 | 2.47E-06 |
| TMCC3     | 321.190089  | 0.46882115   | 0.086906005 | 5.394577152  | 6.87E-08 | 2.48E-06 |
| PCNX      | 889.9316832 | 0.339024226  | 0.062960635 | 5.384701465  | 7.26E-08 | 2.61E-06 |
| DCP1A     | 764.5606532 | 0.400331852  | 0.074464481 | 5.376145084  | 7.61E-08 | 2.74E-06 |
| KCNAB1    | 84.05604413 | -1.227296328 | 0.228392214 | -5.373634713 | 7.72E-08 | 2.77E-06 |
| OSM       | 261.3695544 | 0.723007805  | 0.134867486 | 5.360875546  | 8.28E-08 | 2.97E-06 |
| FARP1     | 538.3137037 | -0.534776531 | 0.099769015 | -5.360146466 | 8.32E-08 | 2.97E-06 |
| ANKRD29   | 96.5653672  | 0.704298854  | 0.131435077 | 5.358530395  | 8.39E-08 | 2.99E-06 |
| CCDC102B  | 39.76604747 | 1.240076683  | 0.23162573  | 5.353795032  | 8.61E-08 | 3.07E-06 |
| MAP1LC3A  | 195.9289794 | -0.559715339 | 0.10461067  | -5.350461273 | 8.77E-08 | 3.12E-06 |
| ATP2B1    | 1134.70532  | 0.375029399  | 0.070174634 | 5.344230214  | 9.08E-08 | 3.22E-06 |
| ITGAX     | 4767.707299 | 0.402925689  | 0.075449956 | 5.34030382   | 9.28E-08 | 3.29E-06 |
| FCGR2C    | 33.51677458 | 1.310180614  | 0.245651365 | 5.333496167  | 9.63E-08 | 3.41E-06 |
| ADORA2B   | 739.0799193 | -0.411051404 | 0.077132521 | -5.329158135 | 9.87E-08 | 3.48E-06 |
| FGF10     | 15.23365506 | 1.839127517  | 0.3452903   | 5.326322575  | 1.00E-07 | 3.53E-06 |
| ABI3      | 107.1722171 | -0.707989081 | 0.133071881 | -5.320350741 | 1.04E-07 | 3.64E-06 |
| PTAFR     | 567.5754725 | 0.511651699  | 0.096172754 | 5.320131532  | 1.04E-07 | 3.64E-06 |
| TOR3A     | 675.0337073 | -0.554910425 | 0.104312178 | -5.319708933 | 1.04E-07 | 3.64E-06 |
| LINC00515 | 103.3176476 | 0.948716627  | 0.178414304 | 5.317491949  | 1.05E-07 | 3.68E-06 |
| IRF9      | 560.8163594 | 0.5034835    | 0.094743923 | 5.314150853  | 1.07E-07 | 3.74E-06 |
| BTG2      | 1357.418909 | 0.354329863  | 0.066725793 | 5.310238293  | 1.09E-07 | 3.81E-06 |
| MEGF9     | 466.2441769 | -0.394245378 | 0.074299517 | -5.306163384 | 1.12E-07 | 3.89E-06 |
| UGP2      | 1568.905552 | 0.320163504  | 0.060343131 | 5.305715761  | 1.12E-07 | 3.90E-06 |
| ESPL1     | 41.95525051 | 0.847802024  | 0.160019529 | 5.298115987  | 1.17E-07 | 4.05E-06 |
| MXD4      | 299.1886773 | -0.346727458 | 0.065547243 | -5.289733625 | 1.22E-07 | 4.24E-06 |
| LOC100121 | 33.09872068 | -1.240392716 | 0.234606382 | -5.287122654 | 1.24E-07 | 4.29E-06 |
| ITPR1     | 596.5043368 | -0.489863229 | 0.092716628 | -5.283445273 | 1.27E-07 | 4.37E-06 |

|          |             |              |             |              |          |          |
|----------|-------------|--------------|-------------|--------------|----------|----------|
| LRR6     | 42.70240988 | -0.896896489 | 0.169956375 | -5.277215937 | 1.31E-07 | 4.51E-06 |
| RNF213   | 1654.445856 | 0.45570448   | 0.086372004 | 5.276066966  | 1.32E-07 | 4.53E-06 |
| CLDN12   | 305.3590903 | 0.443142196  | 0.084093586 | 5.269631349  | 1.37E-07 | 4.69E-06 |
| SLC25A22 | 127.5500043 | 0.599118986  | 0.113707913 | 5.268929567  | 1.37E-07 | 4.70E-06 |
| IRF4     | 42.81451045 | 0.885494956  | 0.168169873 | 5.265479116  | 1.40E-07 | 4.78E-06 |
| ATF3     | 2144.421326 | 0.46365134   | 0.088089352 | 5.263420952  | 1.41E-07 | 4.82E-06 |
| IGF1     | 54.90148528 | 1.126344319  | 0.214077607 | 5.261383168  | 1.43E-07 | 4.87E-06 |
| SPRR3    | 33.73225328 | -0.911526325 | 0.17329853  | -5.259861828 | 1.44E-07 | 4.90E-06 |
| TCP11L2  | 92.79051515 | -0.550065145 | 0.104616691 | -5.257909968 | 1.46E-07 | 4.94E-06 |
| IL6R     | 976.3601357 | 0.583454082  | 0.111038373 | 5.254526576  | 1.48E-07 | 5.02E-06 |
| HDDC2    | 616.7412978 | -0.339854957 | 0.064738161 | -5.2496851   | 1.52E-07 | 5.15E-06 |
| VPS9D1   | 108.1104749 | 0.601804713  | 0.114842521 | 5.240260359  | 1.60E-07 | 5.41E-06 |
| MET      | 178.7984272 | 0.957317854  | 0.182860608 | 5.235232799  | 1.65E-07 | 5.55E-06 |
| RBM8A    | 1945.295223 | 0.379462603  | 0.072499474 | 5.234004913  | 1.66E-07 | 5.58E-06 |
| MUCL1    | 24.52409706 | 1.182507813  | 0.226006207 | 5.232191747  | 1.68E-07 | 5.62E-06 |
| IL2RG    | 2867.771354 | 0.421389627  | 0.080598225 | 5.228274254  | 1.71E-07 | 5.73E-06 |
| FAM210B  | 205.615992  | -0.407856858 | 0.078063968 | -5.224649345 | 1.74E-07 | 5.84E-06 |
| ENDOG    | 127.2907468 | -0.344474612 | 0.065965093 | -5.222074229 | 1.77E-07 | 5.91E-06 |
| AQP9     | 5892.742647 | 0.366292894  | 0.070153364 | 5.221316148  | 1.78E-07 | 5.92E-06 |
| MMP10    | 969.4653755 | 0.664154779  | 0.127256838 | 5.219010537  | 1.80E-07 | 5.99E-06 |
| CALM1    | 2893.957653 | 0.212773909  | 0.040844262 | 5.209395327  | 1.89E-07 | 6.29E-06 |
| CLEC4A   | 617.9034663 | 0.715311567  | 0.137425267 | 5.205094964  | 1.94E-07 | 6.43E-06 |
| ACSL5    | 4300.81584  | 0.472811325  | 0.090848374 | 5.204400546  | 1.95E-07 | 6.44E-06 |
| ZBTB4    | 831.5343372 | -0.41690328  | 0.080132892 | -5.20264863  | 1.96E-07 | 6.49E-06 |
| LXN      | 61.86722594 | -0.588216554 | 0.113092295 | -5.201208049 | 1.98E-07 | 6.53E-06 |
| PIK3R6   | 14.84090163 | 1.27448452   | 0.245043487 | 5.201054454  | 1.98E-07 | 6.53E-06 |
| CLCF1    | 196.7157869 | 0.632912183  | 0.121749639 | 5.198472767  | 2.01E-07 | 6.61E-06 |
| KDM2B    | 163.89388   | -0.553105663 | 0.106431757 | -5.196810392 | 2.03E-07 | 6.65E-06 |
| GPD2     | 2364.431467 | 0.30641277   | 0.058965749 | 5.196453424  | 2.03E-07 | 6.66E-06 |
| P2RY6    | 12.49661922 | 1.295762895  | 0.249492086 | 5.193603187  | 2.06E-07 | 6.75E-06 |
| CD84     | 1989.313741 | -0.609710212 | 0.117477616 | -5.190011793 | 2.10E-07 | 6.85E-06 |
| COQ2     | 297.1743655 | -0.304956196 | 0.058756681 | -5.19015353  | 2.10E-07 | 6.85E-06 |
| DOCK4    | 1088.522447 | 0.40520807   | 0.078089726 | 5.189006157  | 2.11E-07 | 6.88E-06 |
| PSME2    | 1305.767258 | 0.568092221  | 0.109617631 | 5.182489509  | 2.19E-07 | 7.11E-06 |
| CD4      | 996.7947728 | -0.404675822 | 0.078172576 | -5.176698033 | 2.26E-07 | 7.33E-06 |
| RUSC2    | 390.0150607 | 0.435625857  | 0.084174978 | 5.175241703  | 2.28E-07 | 7.37E-06 |
| GPR132   | 40.71177139 | 0.902794615  | 0.174458826 | 5.174829141  | 2.28E-07 | 7.37E-06 |
| NOTCH2   | 2520.000583 | -0.189116125 | 0.036646771 | -5.160512586 | 2.46E-07 | 7.95E-06 |
| PFKFB2   | 139.6631412 | -0.472774103 | 0.091642126 | -5.158916806 | 2.48E-07 | 8.00E-06 |
| PRSS21   | 191.064096  | -0.459063333 | 0.088989236 | -5.158638875 | 2.49E-07 | 8.00E-06 |
| CD300LF  | 774.9405068 | 0.342572614  | 0.066414365 | 5.158110215  | 2.49E-07 | 8.01E-06 |
| ADCY3    | 1540.081265 | -0.250372523 | 0.048556658 | -5.156296399 | 2.52E-07 | 8.07E-06 |
| BRCA2    | 99.69799786 | 0.538020259  | 0.104388104 | 5.154038037  | 2.55E-07 | 8.16E-06 |
| LTBP3    | 149.5834937 | -0.537487274 | 0.104360904 | -5.150274214 | 2.60E-07 | 8.31E-06 |
| KIAA1147 | 566.6646842 | 0.57888615   | 0.112411842 | 5.14969009   | 2.61E-07 | 8.32E-06 |
| NUP107   | 387.1373386 | 0.341021925  | 0.06623052  | 5.149014786  | 2.62E-07 | 8.33E-06 |
| TMEM236  | 27.313469   | 1.1181004    | 0.2171384   | 5.149252271  | 2.62E-07 | 8.33E-06 |

|          |             |              |             |              |          |          |
|----------|-------------|--------------|-------------|--------------|----------|----------|
| ZNF697   | 254.5015984 | 0.444560639  | 0.086433468 | 5.14338544   | 2.70E-07 | 8.56E-06 |
| IFI16    | 2482.584338 | 0.325219722  | 0.063260555 | 5.140955873  | 2.73E-07 | 8.65E-06 |
| MXD1     | 421.091343  | 0.617836727  | 0.120174585 | 5.141159641  | 2.73E-07 | 8.65E-06 |
| CFB      | 1232.569729 | 0.655815182  | 0.127627447 | 5.1385121    | 2.77E-07 | 8.75E-06 |
| ALOX5    | 1171.242556 | -0.52157412  | 0.101519035 | -5.137697762 | 2.78E-07 | 8.77E-06 |
| C15orf38 | 101.3446469 | -0.564215551 | 0.109835191 | -5.136928778 | 2.79E-07 | 8.79E-06 |
| SERPINE2 | 478.9458248 | 0.974395307  | 0.1896987   | 5.136541818  | 2.80E-07 | 8.80E-06 |
| EPB41L1  | 1654.927268 | -0.388838086 | 0.075715536 | -5.135512592 | 2.81E-07 | 8.83E-06 |
| PML      | 245.2435382 | 0.614227428  | 0.119656102 | 5.133272918  | 2.85E-07 | 8.92E-06 |
| ELK3     | 263.1307276 | -0.382060954 | 0.07448396  | -5.129439322 | 2.91E-07 | 9.09E-06 |
| NFKBID   | 215.2114218 | 0.443586554  | 0.086736032 | 5.114213148  | 3.15E-07 | 9.84E-06 |
| CAMK1D   | 165.1231175 | -0.360385509 | 0.070526089 | -5.109960176 | 3.22E-07 | 1.00E-05 |
| CNNM3    | 387.635786  | -0.447981986 | 0.087706251 | -5.107754361 | 3.26E-07 | 1.01E-05 |
| STX11    | 1826.245144 | 0.294338763  | 0.057677838 | 5.103151815  | 3.34E-07 | 1.04E-05 |
| CASP4    | 2897.767741 | 0.435191748  | 0.085493794 | 5.090331415  | 3.57E-07 | 1.11E-05 |
| GADD45G  | 351.6952299 | 0.483568925  | 0.095074238 | 5.086224544  | 3.65E-07 | 1.13E-05 |
| MARCO    | 4083.971195 | -0.331830235 | 0.065256218 | -5.085036231 | 3.68E-07 | 1.14E-05 |
| H2AFY2   | 46.3910342  | -0.72064182  | 0.141795612 | -5.082257539 | 3.73E-07 | 1.15E-05 |
| SH2B2    | 225.2413388 | 0.400536874  | 0.07884149  | 5.080280395  | 3.77E-07 | 1.16E-05 |
| TRIM65   | 210.8887499 | -0.380722884 | 0.074943352 | -5.080142193 | 3.77E-07 | 1.16E-05 |
| DHRX     | 544.6111666 | -0.234512573 | 0.046227891 | -5.072967167 | 3.92E-07 | 1.20E-05 |
| ULK1     | 111.2108179 | -0.535041145 | 0.105674871 | -5.063087743 | 4.13E-07 | 1.27E-05 |
| RAI14    | 41.77960666 | 0.885618728  | 0.175113046 | 5.057411462  | 4.25E-07 | 1.30E-05 |
| PANX1    | 179.9890684 | 0.496644622  | 0.098277134 | 5.053511456  | 4.34E-07 | 1.33E-05 |
| NMT2     | 171.4437237 | -0.489219552 | 0.096869011 | -5.050320507 | 4.41E-07 | 1.34E-05 |
| ZDHC7    | 548.8111359 | -0.312012881 | 0.061777716 | -5.050573309 | 4.40E-07 | 1.34E-05 |
| FCAR     | 335.551716  | 0.739080093  | 0.14646131  | 5.046248008  | 4.51E-07 | 1.37E-05 |
| RAP2B    | 563.0247364 | -0.42236995  | 0.083726527 | -5.044637146 | 4.54E-07 | 1.38E-05 |
| ZAK      | 476.530189  | 0.464464794  | 0.092094461 | 5.043352112  | 4.57E-07 | 1.39E-05 |
| GTF3A    | 1722.838164 | -0.278791761 | 0.055291241 | -5.042240982 | 4.60E-07 | 1.39E-05 |
| MRPS26   | 271.0666018 | -0.407401274 | 0.080880689 | -5.037064822 | 4.73E-07 | 1.43E-05 |
| ACOX3    | 154.738774  | 0.422001565  | 0.083802864 | 5.035646069  | 4.76E-07 | 1.44E-05 |
| CYBRD1   | 32.40006941 | -0.743479146 | 0.14775285  | -5.031910682 | 4.86E-07 | 1.46E-05 |
| TARP     | 76.84692531 | 0.885672077  | 0.176069062 | 5.030253845  | 4.90E-07 | 1.47E-05 |
| CD48     | 125.9295998 | -0.647795872 | 0.128876285 | -5.026493982 | 5.00E-07 | 1.50E-05 |
| IFI30    | 77076.11511 | -0.2549052   | 0.050709197 | -5.026804128 | 4.99E-07 | 1.50E-05 |
| TSPAN15  | 207.8787835 | -0.42464202  | 0.084481499 | -5.026449861 | 5.00E-07 | 1.50E-05 |
| AKAP12   | 41.84021847 | 1.105392719  | 0.219997908 | 5.024560146  | 5.05E-07 | 1.51E-05 |
| KCTD17   | 314.5016128 | -0.47517837  | 0.094584839 | -5.023832335 | 5.07E-07 | 1.51E-05 |
| RAC2     | 7212.780328 | 0.36654479   | 0.072981495 | 5.022434634  | 5.10E-07 | 1.52E-05 |
| CECR1    | 2980.020053 | -0.295677483 | 0.058896779 | -5.020265772 | 5.16E-07 | 1.54E-05 |
| FCGR3A   | 3174.608382 | -0.397640219 | 0.079352764 | -5.011044327 | 5.41E-07 | 1.61E-05 |
| AOC3     | 481.4724227 | -0.514612764 | 0.102704862 | -5.01059789  | 5.43E-07 | 1.61E-05 |
| HELZ2    | 78.30910201 | 0.921235118  | 0.183870636 | 5.010235131  | 5.44E-07 | 1.61E-05 |
| GFPT1    | 281.7911202 | 0.342278752  | 0.068329796 | 5.009216625  | 5.47E-07 | 1.62E-05 |
| ACSL1    | 4133.283368 | -0.485349717 | 0.097039929 | -5.001546497 | 5.69E-07 | 1.68E-05 |
| ADA      | 119.3660912 | -0.834595258 | 0.167458317 | -4.983898507 | 6.23E-07 | 1.84E-05 |

|          |             |              |             |              |          |          |
|----------|-------------|--------------|-------------|--------------|----------|----------|
| SLC7A5   | 350.8088739 | 0.38440025   | 0.077229061 | 4.977404144  | 6.44E-07 | 1.90E-05 |
| HEXB     | 3329.189183 | -0.339740357 | 0.068344807 | -4.970975449 | 6.66E-07 | 1.96E-05 |
| PNP      | 1197.557229 | 0.405731679  | 0.081663254 | 4.968350611  | 6.75E-07 | 1.98E-05 |
| ADD3     | 79.98967939 | -0.458089115 | 0.092445004 | -4.955260886 | 7.22E-07 | 2.12E-05 |
| KCNK13   | 36.05918329 | 0.708620777  | 0.143098352 | 4.951984182  | 7.35E-07 | 2.15E-05 |
| CABLES1  | 205.4604406 | -0.584442834 | 0.118098154 | -4.948788905 | 7.47E-07 | 2.18E-05 |
| RFTN1    | 287.209683  | 0.35540323   | 0.07182432  | 4.948229638  | 7.49E-07 | 2.19E-05 |
| PSMB9    | 1403.814993 | 0.728954379  | 0.147358812 | 4.946798693  | 7.54E-07 | 2.20E-05 |
| MLLT6    | 1085.979488 | 0.291734226  | 0.059094333 | 4.936754726  | 7.94E-07 | 2.31E-05 |
| IRF5     | 2241.903136 | 0.307269094  | 0.062270621 | 4.934415091  | 8.04E-07 | 2.34E-05 |
| NLRP12   | 22.55840237 | -0.898678633 | 0.182428918 | -4.926185184 | 8.39E-07 | 2.43E-05 |
| TSPAN33  | 59.51910694 | -0.579047534 | 0.117628444 | -4.922682913 | 8.54E-07 | 2.47E-05 |
| MBNL2    | 800.7498483 | -0.400551364 | 0.08152021  | -4.913522234 | 8.95E-07 | 2.59E-05 |
| DPH3     | 651.2895312 | 0.248395706  | 0.050562982 | 4.912599966  | 8.99E-07 | 2.60E-05 |
| LOC64383 | 156.6024116 | 0.393513157  | 0.080117176 | 4.911720246  | 9.03E-07 | 2.60E-05 |
| CSF3R    | 155.6499593 | -0.555323042 | 0.113076024 | -4.911059146 | 9.06E-07 | 2.61E-05 |
| TEX30    | 186.1223676 | 0.514177735  | 0.104727369 | 4.909678743  | 9.12E-07 | 2.62E-05 |
| CD44     | 595.3180082 | 0.468115679  | 0.095351259 | 4.909381196  | 9.14E-07 | 2.62E-05 |
| FXR2     | 1004.375592 | 0.239784814  | 0.048845417 | 4.909054509  | 9.15E-07 | 2.62E-05 |
| CSF2RB   | 2669.151328 | 0.391143688  | 0.079721425 | 4.906381033  | 9.28E-07 | 2.66E-05 |
| CXADR    | 105.613092  | -0.972529153 | 0.198346728 | -4.903177206 | 9.43E-07 | 2.70E-05 |
| TPCN1    | 43.33202687 | -1.033943415 | 0.211052943 | -4.898976526 | 9.63E-07 | 2.75E-05 |
| ATP2A2   | 1756.578916 | 0.502631253  | 0.102608221 | 4.898547607  | 9.65E-07 | 2.75E-05 |
| TNIP1    | 6284.699141 | 0.36906947   | 0.075428269 | 4.89298609   | 9.93E-07 | 2.83E-05 |
| AFF4     | 1044.136453 | 0.289075847  | 0.059125457 | 4.88919426   | 1.01E-06 | 2.87E-05 |
| RAP2C    | 778.8758177 | 0.432765825  | 0.088521951 | 4.888796703  | 1.01E-06 | 2.87E-05 |
| TIMP2    | 5291.759892 | -0.441016882 | 0.090204804 | -4.889062048 | 1.01E-06 | 2.87E-05 |
| KLHDC2   | 286.366289  | -0.338603471 | 0.069289756 | -4.886775345 | 1.03E-06 | 2.90E-05 |
| FAM162A  | 354.6295597 | -0.254773967 | 0.052146552 | -4.885729845 | 1.03E-06 | 2.91E-05 |
| NME3     | 164.7748754 | -0.536475179 | 0.10993785  | -4.87980416  | 1.06E-06 | 3.00E-05 |
| SLC50A1  | 671.4420881 | 0.300130059  | 0.061520794 | 4.878514074  | 1.07E-06 | 3.01E-05 |
| TRAPPC6A | 73.2817117  | -0.577546766 | 0.118393618 | -4.878191718 | 1.07E-06 | 3.01E-05 |
| DNAJB9   | 398.1817454 | 0.450154877  | 0.092359619 | 4.873936064  | 1.09E-06 | 3.07E-05 |
| SORT1    | 2968.227292 | 0.508711796  | 0.104405126 | 4.872479137  | 1.10E-06 | 3.09E-05 |
| MSRB2    | 228.1041061 | -0.483135099 | 0.099186861 | -4.870958632 | 1.11E-06 | 3.11E-05 |
| PVR      | 1023.195105 | 0.464544957  | 0.095403263 | 4.869277431  | 1.12E-06 | 3.13E-05 |
| PARP14   | 1692.57793  | 0.41960048   | 0.086267214 | 4.863962321  | 1.15E-06 | 3.21E-05 |
| GFPT2    | 46.93570779 | 1.073308595  | 0.22083849  | 4.860151845  | 1.17E-06 | 3.27E-05 |
| ADAMTS1  | 44.64490709 | -0.958115674 | 0.197519493 | -4.850739836 | 1.23E-06 | 3.42E-05 |
| DDX60    | 331.1640984 | 0.582690451  | 0.12014975  | 4.849701749  | 1.24E-06 | 3.44E-05 |
| ZNF652   | 109.6457945 | -0.622591621 | 0.128476511 | -4.84595678  | 1.26E-06 | 3.50E-05 |
| MX1      | 1934.447958 | 0.794123067  | 0.163982849 | 4.842720273  | 1.28E-06 | 3.55E-05 |
| A2M      | 476.2690543 | -0.462283459 | 0.095499401 | -4.84069488  | 1.29E-06 | 3.58E-05 |
| C7orf57  | 6.628351815 | 2.17305441   | 0.448923645 | 4.840588005  | 1.29E-06 | 3.58E-05 |
| EYA3     | 685.9706968 | 0.492576413  | 0.101883926 | 4.834682274  | 1.33E-06 | 3.68E-05 |
| NSUN3    | 335.7069125 | 0.288795486  | 0.059889346 | 4.822151307  | 1.42E-06 | 3.91E-05 |
| HPS5     | 1232.650397 | 0.255172693  | 0.052925907 | 4.821319277  | 1.43E-06 | 3.93E-05 |

|          |             |              |             |              |          |          |
|----------|-------------|--------------|-------------|--------------|----------|----------|
| C5orf15  | 1029.356603 | 0.385348344  | 0.079962524 | 4.819111784  | 1.44E-06 | 3.96E-05 |
| SCCPDH   | 1427.133405 | -0.381762479 | 0.079222782 | -4.818847141 | 1.44E-06 | 3.96E-05 |
| #N/A     | 1131.204124 | 0.472785516  | 0.098213818 | 4.813839086  | 1.48E-06 | 4.06E-05 |
| TGFBI    | 2216.808555 | -0.526782305 | 0.109490718 | -4.811205123 | 1.50E-06 | 4.11E-05 |
| POLR3D   | 275.1218008 | 0.378732468  | 0.078727987 | 4.81064591   | 1.50E-06 | 4.11E-05 |
| FAM110A  | 108.5369112 | -0.43316353  | 0.090050088 | -4.810251073 | 1.51E-06 | 4.11E-05 |
| LNPEP    | 53.0883327  | 0.86649185   | 0.180271578 | 4.806591596  | 1.54E-06 | 4.18E-05 |
| CLSTN3   | 74.82286959 | 0.529248483  | 0.110141764 | 4.805157131  | 1.55E-06 | 4.20E-05 |
| RPS6KA3  | 1718.14273  | 0.382586907  | 0.079619078 | 4.805216494  | 1.55E-06 | 4.20E-05 |
| IFI27    | 1792.601199 | 0.492947975  | 0.102732125 | 4.798381961  | 1.60E-06 | 4.34E-05 |
| TK2      | 272.4907558 | -0.337727207 | 0.070411966 | -4.79644618  | 1.62E-06 | 4.38E-05 |
| OAS2     | 631.7737248 | 0.881944802  | 0.183986735 | 4.793523838  | 1.64E-06 | 4.43E-05 |
| NOV      | 12.51545495 | -1.409971635 | 0.29447817  | -4.788034499 | 1.68E-06 | 4.55E-05 |
| ATL1     | 98.34285566 | 0.528915358  | 0.110526849 | 4.785401579  | 1.71E-06 | 4.60E-05 |
| PHLDA3   | 390.5677799 | -0.46389134  | 0.097055985 | -4.779626342 | 1.76E-06 | 4.73E-05 |
| NDRG1    | 1314.47178  | 0.387723344  | 0.081137678 | 4.778585637  | 1.77E-06 | 4.75E-05 |
| ITGAM    | 568.4355328 | 0.543595689  | 0.113786202 | 4.777342755  | 1.78E-06 | 4.76E-05 |
| NPC1     | 2717.269325 | 0.387795994  | 0.081171986 | 4.777460935  | 1.78E-06 | 4.76E-05 |
| PGM5     | 101.571914  | -0.708262604 | 0.148252795 | -4.777397971 | 1.78E-06 | 4.76E-05 |
| HAMP     | 17.68375148 | -1.211596259 | 0.253639375 | -4.776846097 | 1.78E-06 | 4.76E-05 |
| FAM214A  | 125.1634609 | -0.414703681 | 0.086834008 | -4.775821031 | 1.79E-06 | 4.78E-05 |
| TMTC3    | 194.5040885 | 0.433344044  | 0.090771095 | 4.774031234  | 1.81E-06 | 4.82E-05 |
| BRD3     | 337.9185263 | -0.33951315  | 0.071174405 | -4.770157928 | 1.84E-06 | 4.91E-05 |
| CERS6    | 897.3877508 | 0.244913382  | 0.051357485 | 4.768796252  | 1.85E-06 | 4.93E-05 |
| CXCL11   | 149.7027114 | 2.209001708  | 0.4633564   | 4.767392247  | 1.87E-06 | 4.96E-05 |
| OXER1    | 52.53258244 | -0.753714503 | 0.158144452 | -4.765987626 | 1.88E-06 | 4.99E-05 |
| GNA15    | 1671.940942 | 0.391814954  | 0.082232432 | 4.764725336  | 1.89E-06 | 5.01E-05 |
| STAU1    | 243.80211   | 0.487542523  | 0.102332579 | 4.764294276  | 1.90E-06 | 5.02E-05 |
| TCEB2    | 3250.961023 | -0.347874374 | 0.073025582 | -4.763733002 | 1.90E-06 | 5.02E-05 |
| MFNG     | 367.5225441 | -0.374469402 | 0.078673197 | -4.759809147 | 1.94E-06 | 5.11E-05 |
| BATF3    | 95.41726773 | 0.738083735  | 0.155093447 | 4.758961431  | 1.95E-06 | 5.13E-05 |
| ICK      | 142.2306772 | -0.318028269 | 0.066830615 | -4.758721255 | 1.95E-06 | 5.13E-05 |
| SFPQ     | 1345.479006 | 0.272111985  | 0.057215786 | 4.755889976  | 1.98E-06 | 5.19E-05 |
| ELL      | 173.9854743 | 0.432622729  | 0.091018664 | 4.753121051  | 2.00E-06 | 5.25E-05 |
| VAMP5    | 146.2152356 | 1.029684799  | 0.216628288 | 4.753233332  | 2.00E-06 | 5.25E-05 |
| SERTAD1  | 478.6481213 | 0.381172429  | 0.080213551 | 4.751970499  | 2.01E-06 | 5.26E-05 |
| TMEM223  | 94.08480905 | -0.497049235 | 0.104590286 | -4.752346075 | 2.01E-06 | 5.26E-05 |
| ZNF552   | 59.70831547 | -0.622984407 | 0.131100622 | -4.751956156 | 2.01E-06 | 5.26E-05 |
| BTN2A2   | 335.5581369 | 0.485110336  | 0.102094306 | 4.751590519  | 2.02E-06 | 5.26E-05 |
| SPTSSA   | 354.3493038 | -0.28085427  | 0.059140959 | -4.748896138 | 2.05E-06 | 5.32E-05 |
| RPL23    | 6896.028424 | -0.250079446 | 0.052751602 | -4.74069863  | 2.13E-06 | 5.54E-05 |
| CDC37    | 1552.448952 | 0.339695052  | 0.071704062 | 4.737459002  | 2.16E-06 | 5.62E-05 |
| LIMK1    | 5259.325024 | 0.254181749  | 0.053663204 | 4.73661145   | 2.17E-06 | 5.64E-05 |
| RAP2A    | 1921.810986 | 0.34618031   | 0.073174563 | 4.73088318   | 2.24E-06 | 5.79E-05 |
| C1orf233 | 53.51675429 | -0.842737298 | 0.178214702 | -4.728775387 | 2.26E-06 | 5.84E-05 |
| DDX21    | 496.9603015 | 0.408266969  | 0.086339644 | 4.728615406  | 2.26E-06 | 5.84E-05 |
| EPB41    | 279.2172158 | -0.392373334 | 0.083012045 | -4.726703644 | 2.28E-06 | 5.89E-05 |

|           |             |              |             |              |          |          |
|-----------|-------------|--------------|-------------|--------------|----------|----------|
| SOWAHD    | 170.8361787 | -0.449306318 | 0.095103362 | -4.724399945 | 2.31E-06 | 5.94E-05 |
| ARAP3     | 88.12429198 | 0.620810896  | 0.131421671 | 4.723809174  | 2.31E-06 | 5.95E-05 |
| FLVCR2    | 2071.076343 | 0.617071647  | 0.130664447 | 4.722567333  | 2.33E-06 | 5.98E-05 |
| HADH      | 168.406961  | -0.516643667 | 0.109501124 | -4.718158583 | 2.38E-06 | 6.11E-05 |
| PCED1B-AS | 167.5749752 | -0.394796243 | 0.083688882 | -4.717427632 | 2.39E-06 | 6.12E-05 |
| BZW1      | 3858.040014 | 0.262113392  | 0.05557661  | 4.71625368   | 2.40E-06 | 6.15E-05 |
| DUSP1     | 3386.56126  | 0.4180785    | 0.088658852 | 4.71558669   | 2.41E-06 | 6.16E-05 |
| LPP       | 372.1820126 | 0.424745206  | 0.090082521 | 4.715067936  | 2.42E-06 | 6.17E-05 |
| ERGIC2    | 1125.247885 | 0.293073444  | 0.062199833 | 4.711804378  | 2.46E-06 | 6.25E-05 |
| GTF2IRD2E | 80.91413138 | -0.437516725 | 0.092854072 | -4.711874403 | 2.45E-06 | 6.25E-05 |
| S100A8    | 143.3934268 | -0.889732616 | 0.188845577 | -4.711429463 | 2.46E-06 | 6.25E-05 |
| FRAT1     | 99.19170236 | -0.606583648 | 0.128777027 | -4.710340525 | 2.47E-06 | 6.28E-05 |
| ECH1      | 1204.489599 | -0.37296686  | 0.079197738 | -4.709312055 | 2.49E-06 | 6.29E-05 |
| METTL1    | 464.7654202 | 0.457680916  | 0.097183154 | 4.709467635  | 2.48E-06 | 6.29E-05 |
| SPHK1     | 1090.807783 | 0.357811489  | 0.076028973 | 4.706251765  | 2.52E-06 | 6.38E-05 |
| RBP4      | 3057.319981 | -0.362910177 | 0.077121965 | -4.705665581 | 2.53E-06 | 6.39E-05 |
| MRI1      | 122.6604284 | -0.511955994 | 0.108854877 | -4.70310573  | 2.56E-06 | 6.46E-05 |
| BBS2      | 668.9773197 | -0.39753921  | 0.084544898 | -4.702107622 | 2.57E-06 | 6.48E-05 |
| CTSK      | 23.8890295  | -0.857130066 | 0.182426614 | -4.698492438 | 2.62E-06 | 6.59E-05 |
| SLC35B4   | 268.8925482 | 0.516369764  | 0.109968955 | 4.695595818  | 2.66E-06 | 6.68E-05 |
| LOC28597: | 24.85057112 | 1.434648652  | 0.305555105 | 4.695220698  | 2.66E-06 | 6.68E-05 |
| SLC35E3   | 614.6724203 | -0.336780257 | 0.071738808 | -4.694533771 | 2.67E-06 | 6.69E-05 |
| RNF141    | 111.416284  | -0.458174375 | 0.097817525 | -4.683970239 | 2.81E-06 | 7.04E-05 |
| IVNS1ABP  | 1535.089382 | 0.406868849  | 0.086869759 | 4.683664997  | 2.82E-06 | 7.04E-05 |
| PLA1A     | 34.73254377 | 0.972788532  | 0.207722747 | 4.68311029   | 2.83E-06 | 7.05E-05 |
| STAT2     | 1274.770242 | 0.467582839  | 0.099906451 | 4.68020669   | 2.87E-06 | 7.14E-05 |
| MYO1G     | 160.1808302 | 0.538952768  | 0.115233504 | 4.677049206  | 2.91E-06 | 7.24E-05 |
| IGFBP3    | 19.17631277 | 1.375556804  | 0.294187448 | 4.675783464  | 2.93E-06 | 7.28E-05 |
| PINK1     | 462.1317752 | -0.390819453 | 0.083594721 | -4.675169065 | 2.94E-06 | 7.29E-05 |
| OTUD4     | 634.9188233 | 0.344208878  | 0.073630385 | 4.674821092  | 2.94E-06 | 7.30E-05 |
| B3GNT2    | 235.5970275 | -0.289590297 | 0.062013616 | -4.669785693 | 3.02E-06 | 7.47E-05 |
| SGMS1     | 1225.959535 | 0.292852514  | 0.06275191  | 4.666830261  | 3.06E-06 | 7.56E-05 |
| SLC39A14  | 48.46953894 | 0.865046119  | 0.185407977 | 4.665635926  | 3.08E-06 | 7.60E-05 |
| DCAF4     | 97.38862924 | -0.463683436 | 0.099448548 | -4.662546051 | 3.12E-06 | 7.70E-05 |
| ZNF763    | 33.66395726 | -0.606839939 | 0.130180712 | -4.661519583 | 3.14E-06 | 7.73E-05 |
| LOXHD1    | 7.073772321 | 2.020308116  | 0.43366435  | 4.658690792  | 3.18E-06 | 7.83E-05 |
| CTNNBIP1  | 110.9451617 | -0.520895204 | 0.11191068  | -4.654562045 | 3.25E-06 | 7.97E-05 |
| XYLT2     | 187.1249365 | -0.44960957  | 0.096591952 | -4.654731193 | 3.24E-06 | 7.97E-05 |
| DNM2      | 1477.598997 | 0.325988795  | 0.070083039 | 4.65146492   | 3.30E-06 | 8.08E-05 |
| ADAM19    | 21.88408528 | 1.104673148  | 0.237532722 | 4.650614611  | 3.31E-06 | 8.10E-05 |
| MDM4      | 363.5208388 | 0.348345192  | 0.074941689 | 4.648216457  | 3.35E-06 | 8.19E-05 |
| THYN1     | 81.40438903 | -0.505428672 | 0.108775005 | -4.646551587 | 3.38E-06 | 8.24E-05 |
| SLC24A4   | 27.78064021 | -1.027594146 | 0.221175983 | -4.64604761  | 3.38E-06 | 8.25E-05 |
| STOX2     | 16.49843946 | -1.121873846 | 0.241711006 | -4.641385037 | 3.46E-06 | 8.43E-05 |
| IFITM1    | 377.5448165 | 0.758343633  | 0.163426464 | 4.640274382  | 3.48E-06 | 8.46E-05 |
| CBX7      | 66.60411163 | -0.838476902 | 0.180757335 | -4.638688124 | 3.51E-06 | 8.52E-05 |
| DTX3L     | 1009.305957 | 0.396070532  | 0.085430731 | 4.636159912  | 3.55E-06 | 8.61E-05 |

|           |             |              |             |              |          |             |
|-----------|-------------|--------------|-------------|--------------|----------|-------------|
| PIP5K1C   | 1143.230444 | 0.353421941  | 0.076258428 | 4.63452959   | 3.58E-06 | 8.67E-05    |
| TUBB6     | 2003.660607 | 0.321167116  | 0.069370856 | 4.629712466  | 3.66E-06 | 8.86E-05    |
| PTPN22    | 468.8537879 | -0.383903863 | 0.083029182 | -4.623722085 | 3.77E-06 | 9.11E-05    |
| FAM168A   | 275.753335  | -0.453003345 | 0.097993419 | -4.622793569 | 3.79E-06 | 9.14E-05    |
| FOSL1     | 145.5620925 | 0.473535256  | 0.10265225  | 4.613004179  | 3.97E-06 | 9.57E-05    |
| PLEK      | 3241.240683 | 0.460186422  | 0.099972985 | 4.603107745  | 4.16E-06 | 0.000100239 |
| GDF15     | 597.1930823 | 0.594277615  | 0.129140206 | 4.601801657  | 4.19E-06 | 0.000100744 |
| MB21D1    | 424.3960701 | 0.474445439  | 0.103218399 | 4.596520047  | 4.30E-06 | 0.000103202 |
| MNDA      | 766.6641386 | 0.534884145  | 0.116390023 | 4.595618505  | 4.31E-06 | 0.00010352  |
| RASAL1    | 18.10169786 | -1.020405057 | 0.222109827 | -4.594146374 | 4.35E-06 | 0.000104124 |
| RNPEPL1   | 1834.790934 | -0.324407063 | 0.070628935 | -4.593118408 | 4.37E-06 | 0.000104508 |
| EPSTI1    | 415.3518199 | 0.86832185   | 0.189076482 | 4.592437108  | 4.38E-06 | 0.00010472  |
| HARS      | 300.1110359 | 0.297472282  | 0.064814115 | 4.589621926  | 4.44E-06 | 0.000106011 |
| SPIN4     | 290.5769648 | 0.599779331  | 0.130799882 | 4.58547303   | 4.53E-06 | 0.000108004 |
| CTSD      | 53732.99392 | -0.292306192 | 0.063791081 | -4.582242338 | 4.60E-06 | 0.000109551 |
| TP53INP1  | 31.46138814 | -0.74782928  | 0.163213916 | -4.581896564 | 4.61E-06 | 0.000109597 |
| GALNT12   | 1189.392322 | -0.306691781 | 0.066993271 | -4.577949021 | 4.70E-06 | 0.000111547 |
| MYO1E     | 1131.723483 | 0.283839745  | 0.06201006  | 4.577317711  | 4.71E-06 | 0.000111747 |
| CXCR7     | 17.00324674 | -1.386304579 | 0.303241237 | -4.571622887 | 4.84E-06 | 0.000114686 |
| WARS      | 10213.07273 | 0.604723804  | 0.132374158 | 4.568291977  | 4.92E-06 | 0.000116381 |
| TET2      | 325.005386  | 0.329953858  | 0.07225484  | 4.566529487  | 4.96E-06 | 0.000117219 |
| ANPEP     | 8882.763053 | 0.359083235  | 0.078649636 | 4.565605802  | 4.98E-06 | 0.000117592 |
| LOC10012! | 3322.862722 | 0.485927989  | 0.106445502 | 4.565040145  | 4.99E-06 | 0.000117765 |
| ISG15     | 774.2453415 | 0.742990387  | 0.162822814 | 4.563183556  | 5.04E-06 | 0.000118667 |
| C21orf91  | 181.3144083 | 0.46527941   | 0.101995951 | 4.561743915  | 5.07E-06 | 0.000119337 |
| ABHD12    | 1690.992386 | -0.335130568 | 0.073513633 | -4.558754005 | 5.15E-06 | 0.000120901 |
| RAB39A    | 158.4191835 | 0.424172065  | 0.09313321  | 4.554466306  | 5.25E-06 | 0.000123243 |
| CMSS1     | 134.4961629 | -0.414763678 | 0.091098502 | -4.552914352 | 5.29E-06 | 0.000124005 |
| GRAMD1A   | 1907.888088 | 0.455302641  | 0.100016811 | 4.552261127  | 5.31E-06 | 0.00012424  |
| TSPAN13   | 102.860968  | -0.696088146 | 0.152957964 | -4.550846045 | 5.34E-06 | 0.000124927 |
| CLCN4     | 127.463055  | -0.568473104 | 0.125085254 | -4.544685202 | 5.50E-06 | 0.000128481 |
| GRN       | 12358.46678 | -0.446175468 | 0.098187415 | -4.544120752 | 5.52E-06 | 0.000128669 |
| TANC2     | 383.9950374 | -0.40413954  | 0.088985807 | -4.541617981 | 5.58E-06 | 0.000130049 |
| C17orf96  | 23.75433384 | 0.973056459  | 0.21428814  | 4.540878746  | 5.60E-06 | 0.000130349 |
| PLEKHM3   | 1290.616251 | 0.24451204   | 0.053887545 | 4.537449941  | 5.69E-06 | 0.000132325 |
| MYO5A     | 1735.792087 | -0.257362122 | 0.056726248 | -4.536914257 | 5.71E-06 | 0.000132343 |
| TNFSF10   | 93.01260559 | 1.329133519  | 0.292953425 | 4.537013067  | 5.71E-06 | 0.000132343 |
| ZYG11B    | 213.555178  | -0.347910119 | 0.076714083 | -4.535153181 | 5.76E-06 | 0.000133291 |
| CLEC2D    | 147.5314436 | 0.825075859  | 0.182341637 | 4.524890054  | 6.04E-06 | 0.000139758 |
| DESI1     | 809.175795  | 0.484326471  | 0.107104534 | 4.521997829  | 6.13E-06 | 0.000141512 |
| ABCC5     | 112.6521512 | -0.431946199 | 0.095648205 | -4.515988536 | 6.30E-06 | 0.000145411 |
| RNF130    | 6080.357408 | -0.378387058 | 0.083800111 | -4.515352685 | 6.32E-06 | 0.000145674 |
| NDUFV2    | 800.1824546 | 0.601709124  | 0.133300697 | 4.51392332   | 6.36E-06 | 0.000146484 |
| CASP1     | 946.327503  | 0.536443266  | 0.118905371 | 4.511514157  | 6.44E-06 | 0.000147805 |
| STIP1     | 4252.333154 | 0.241764916  | 0.053587331 | 4.511605858  | 6.43E-06 | 0.000147805 |
| MS4A6E    | 17.68525588 | -0.963836669 | 0.21374789  | -4.509221919 | 6.51E-06 | 0.000149233 |
| FKBP5     | 1214.323911 | 0.473313595  | 0.104994893 | 4.507967796  | 6.55E-06 | 0.000149904 |

|           |             |              |             |              |          |             |
|-----------|-------------|--------------|-------------|--------------|----------|-------------|
| UXS1      | 1842.050131 | 0.273561906  | 0.06068681  | 4.507765449  | 6.55E-06 | 0.000149904 |
| ME3       | 38.04566864 | -0.636176953 | 0.141146959 | -4.507195593 | 6.57E-06 | 0.000150129 |
| S1PR1     | 9.30155066  | -1.550574319 | 0.344404565 | -4.502188642 | 6.73E-06 | 0.000153528 |
| BCS1L     | 99.145986   | -0.384732583 | 0.085516521 | -4.498926997 | 6.83E-06 | 0.000155718 |
| CLDN1     | 40.87231792 | 0.805909538  | 0.179190892 | 4.497491635  | 6.88E-06 | 0.000156587 |
| SECTM1    | 301.3366837 | 0.899924944  | 0.200153362 | 4.496176999  | 6.92E-06 | 0.000157186 |
| XAF1      | 143.3650222 | 0.878568126  | 0.195398079 | 4.496298689  | 6.91E-06 | 0.000157186 |
| NAMPT     | 8044.64053  | 0.361722152  | 0.080492952 | 4.493836324  | 7.00E-06 | 0.000158738 |
| GSDMD     | 1027.88199  | 0.411637323  | 0.091653496 | 4.49123426   | 7.08E-06 | 0.000160478 |
| TNS1      | 153.6528039 | -0.730662804 | 0.162694411 | -4.491013552 | 7.09E-06 | 0.000160478 |
| CLEC1A    | 31.72050067 | 0.935482714  | 0.208351364 | 4.489928438  | 7.12E-06 | 0.000161109 |
| HIST1H1D  | 192.5716761 | -0.386444434 | 0.086113403 | -4.487622361 | 7.20E-06 | 0.000162671 |
| CD22      | 81.35018381 | -0.539608649 | 0.120261449 | -4.486962791 | 7.22E-06 | 0.000162984 |
| AIF1      | 869.0312957 | -0.493826301 | 0.110125356 | -4.484219805 | 7.32E-06 | 0.000164902 |
| ZNF276    | 144.4160793 | 0.39843854   | 0.088962305 | 4.47873444   | 7.51E-06 | 0.000168998 |
| SERPINF2  | 37.46665712 | -0.577224878 | 0.12902735  | -4.473662953 | 7.69E-06 | 0.000172857 |
| SAMD8     | 198.0236792 | 0.391287616  | 0.087564137 | 4.46858302   | 7.87E-06 | 0.000176806 |
| GPX1      | 8796.179202 | -0.363652417 | 0.081446716 | -4.464911969 | 8.01E-06 | 0.000179655 |
| WIP1      | 231.0091751 | -0.326167591 | 0.07308683  | -4.462740998 | 8.09E-06 | 0.000181275 |
| SLC30A7   | 938.8878328 | 0.483188969  | 0.108441977 | 4.455737378  | 8.36E-06 | 0.000187078 |
| IRF1      | 1319.116199 | 0.662942035  | 0.148836996 | 4.454148174  | 8.42E-06 | 0.00018825  |
| TSTD3     | 9.086655264 | -1.094486931 | 0.245938428 | -4.450247721 | 8.58E-06 | 0.00019148  |
| DYNLT1    | 875.411469  | 0.450536789  | 0.10128272  | 4.448308565  | 8.65E-06 | 0.000192993 |
| MMP14     | 8255.932036 | 0.221300297  | 0.049758768 | 4.447463375  | 8.69E-06 | 0.000193529 |
| IL1RAP    | 79.25260858 | 0.884063573  | 0.198813108 | 4.446706663  | 8.72E-06 | 0.000193988 |
| KLF11     | 633.7455927 | -0.256706835 | 0.05774732  | -4.445346281 | 8.78E-06 | 0.000194994 |
| CPT1B     | 170.5105202 | 0.411524747  | 0.092581822 | 4.444984336  | 8.79E-06 | 0.000195098 |
| DOCK10    | 579.6929988 | 0.317548799  | 0.071459544 | 4.443756284  | 8.84E-06 | 0.000195989 |
| DNAJC18   | 36.61502749 | 0.746467152  | 0.168067383 | 4.441475438  | 8.93E-06 | 0.000197851 |
| LPCAT1    | 617.0198323 | -0.310192186 | 0.069954907 | -4.434173381 | 9.24E-06 | 0.000204441 |
| LRG1      | 32.15614857 | 0.851001484  | 0.192038093 | 4.431420207  | 9.36E-06 | 0.000206832 |
| TOR1B     | 788.8507747 | 0.397928526  | 0.089880275 | 4.427317633  | 9.54E-06 | 0.000210563 |
| MCL1      | 3511.618081 | 0.270579399  | 0.061123321 | 4.426778396  | 9.57E-06 | 0.000210848 |
| CLU10S    | 96.34426902 | 1.19773288   | 0.271106498 | 4.41794235   | 9.96E-06 | 0.000219401 |
| ARFGAP3   | 1045.63191  | 0.327554703  | 0.074149468 | 4.41749229   | 9.99E-06 | 0.000219607 |
| HMGB2     | 337.5102778 | -0.382428882 | 0.086602402 | -4.415915422 | 1.01E-05 | 0.000220962 |
| C10orf54  | 141.2365568 | -0.484674133 | 0.109784143 | -4.414791795 | 1.01E-05 | 0.00022186  |
| KIF3C     | 25.92559011 | -0.727752239 | 0.164910499 | -4.413013376 | 1.02E-05 | 0.000223429 |
| SLC18B1   | 26.2885797  | -0.599551461 | 0.135867215 | -4.412775097 | 1.02E-05 | 0.000223429 |
| AMICA1    | 40.17970967 | -0.925493158 | 0.210044378 | -4.406179139 | 1.05E-05 | 0.000230077 |
| LRRC45    | 83.36242162 | -0.499218386 | 0.113324456 | -4.405213187 | 1.06E-05 | 0.000230842 |
| FAM216A   | 7.185021212 | -1.0971275   | 0.249081907 | -4.404685651 | 1.06E-05 | 0.000231143 |
| PWWP2B    | 88.70477462 | -0.494421572 | 0.112266545 | -4.403997375 | 1.06E-05 | 0.000231615 |
| HADHA     | 2483.003464 | -0.189444464 | 0.043048737 | -4.400697349 | 1.08E-05 | 0.000234901 |
| TNFRSF10A | 204.0741069 | 0.364149531  | 0.082770061 | 4.399531967  | 1.08E-05 | 0.000235899 |
| LGR4      | 12.6341925  | -0.901062256 | 0.20490487  | -4.397466283 | 1.10E-05 | 0.000237886 |
| RASSF8    | 257.5504622 | -0.269050255 | 0.061227014 | -4.394306294 | 1.11E-05 | 0.000241101 |

|           |             |              |             |              |          |             |
|-----------|-------------|--------------|-------------|--------------|----------|-------------|
| VWA7      | 30.41994525 | -0.604033735 | 0.137474053 | -4.393801764 | 1.11E-05 | 0.000241389 |
| CAMP      | 93.06657405 | -0.576299988 | 0.131177287 | -4.393290937 | 1.12E-05 | 0.000241686 |
| SLAMF7    | 5431.856251 | 0.592460402  | 0.134863576 | 4.393034934  | 1.12E-05 | 0.000241699 |
| PKD2      | 330.1275487 | -0.401863089 | 0.091501025 | -4.391897148 | 1.12E-05 | 0.000242695 |
| PNPLA1    | 81.23318981 | 0.866249765  | 0.197250185 | 4.391629679  | 1.13E-05 | 0.000242722 |
| OSGIN2    | 973.5311731 | 0.323407062  | 0.073749806 | 4.38519202   | 1.16E-05 | 0.000249733 |
| KIAA0247  | 2029.976356 | 0.235463687  | 0.053748009 | 4.38088202   | 1.18E-05 | 0.00025444  |
| FCRLA     | 16.84028029 | 1.232499734  | 0.281371992 | 4.380321318  | 1.19E-05 | 0.000254811 |
| SPARC     | 2264.546515 | -0.461967543 | 0.105571843 | -4.375859415 | 1.21E-05 | 0.00025979  |
| STAT3     | 1772.353987 | 0.302029478  | 0.069049437 | 4.374104845  | 1.22E-05 | 0.000261597 |
| MAPRE3    | 30.74918206 | 1.029611699  | 0.235531064 | 4.371447585  | 1.23E-05 | 0.000264507 |
| HIVEP2    | 104.2676799 | 0.603462309  | 0.138142296 | 4.368410872  | 1.25E-05 | 0.000267913 |
| MFSD3     | 75.12722744 | -0.521335279 | 0.119357908 | -4.367831894 | 1.25E-05 | 0.000268326 |
| CCRL2     | 2645.468964 | 0.37246908   | 0.085354072 | 4.363811492  | 1.28E-05 | 0.000273004 |
| TMEM217   | 14.41863269 | 1.06597794   | 0.244312552 | 4.363173044  | 1.28E-05 | 0.000273499 |
| ACBD4     | 52.10906905 | -0.500268008 | 0.114665209 | -4.362857835 | 1.28E-05 | 0.000273591 |
| PKD2L1    | 17.41570401 | -1.274447117 | 0.292195948 | -4.361618031 | 1.29E-05 | 0.000274842 |
| H2AFZ     | 3002.593197 | -0.218960585 | 0.050209968 | -4.360898723 | 1.30E-05 | 0.000275443 |
| LOC10050! | 52.88216066 | -0.564668679 | 0.129521362 | -4.359656758 | 1.30E-05 | 0.000276705 |
| MTSS1     | 62.95068121 | 0.556355081  | 0.127676016 | 4.35755357   | 1.32E-05 | 0.000279069 |
| TMEM167   | 768.697298  | 0.210093493  | 0.048231592 | 4.355931162  | 1.33E-05 | 0.000280835 |
| PTPRE     | 2970.997911 | 0.387967587  | 0.089076026 | 4.355465851  | 1.33E-05 | 0.000281123 |
| HTR7      | 3.691382812 | 2.099950323  | 0.482358501 | 4.353505367  | 1.34E-05 | 0.000283339 |
| CRIP1     | 372.6910359 | -0.401530052 | 0.092265867 | -4.351880757 | 1.35E-05 | 0.000285134 |
| CTSL1     | 37553.32514 | 0.266657695  | 0.06131002  | 4.34933307   | 1.37E-05 | 0.000288151 |
| DDX60L    | 2150.373112 | 0.440937692  | 0.101451544 | 4.346288615  | 1.38E-05 | 0.000291857 |
| EIF1AY    | 168.2860919 | 0.384812195  | 0.088554554 | 4.345481722  | 1.39E-05 | 0.000292612 |
| SOWAHC    | 540.9053893 | 0.398595152  | 0.09181463  | 4.341303261  | 1.42E-05 | 0.000297908 |
| CRTAP     | 833.4674057 | -0.402215328 | 0.092724286 | -4.337756018 | 1.44E-05 | 0.000301767 |
| PIP5K1A   | 204.995635  | 0.300539648  | 0.069282652 | 4.337877369  | 1.44E-05 | 0.000301767 |
| TRIB1     | 717.0514742 | 0.433132283  | 0.099850733 | 4.337797736  | 1.44E-05 | 0.000301767 |
| C3orf52   | 21.72206545 | 0.752616848  | 0.173521843 | 4.337303221  | 1.44E-05 | 0.000302061 |
| INPP5D    | 236.634875  | -0.42859103  | 0.098823112 | -4.336951366 | 1.44E-05 | 0.000302216 |
| STRN3     | 495.2042534 | 0.301262096  | 0.069467886 | 4.336710276  | 1.45E-05 | 0.000302219 |
| TFCP2L1   | 173.5493367 | -0.366063173 | 0.084418058 | -4.336313581 | 1.45E-05 | 0.000302437 |
| FDXR      | 32.90533927 | -0.513010288 | 0.118459794 | -4.330670105 | 1.49E-05 | 0.000309958 |
| ARHGAP9   | 274.1416435 | 0.401764776  | 0.092817944 | 4.328524843  | 1.50E-05 | 0.000312316 |
| IL24      | 9.851646527 | 1.977969344  | 0.456946313 | 4.328669005  | 1.50E-05 | 0.000312316 |
| SERPINB6  | 1099.864157 | -0.20546339  | 0.047488403 | -4.326601334 | 1.51E-05 | 0.000314715 |
| SEMA4B    | 196.6569697 | 0.38723405   | 0.089544826 | 4.324471515  | 1.53E-05 | 0.000317428 |
| HSPA5     | 6765.582214 | 0.2990253    | 0.069152977 | 4.324113163  | 1.53E-05 | 0.000317602 |
| FAM102B   | 420.8265638 | -0.335643873 | 0.077638113 | -4.323184315 | 1.54E-05 | 0.0003186   |
| FAM26F    | 73.37588688 | 1.405575916  | 0.325334351 | 4.320404262  | 1.56E-05 | 0.000322294 |
| IL27      | 34.39352108 | 1.010674595  | 0.23398891  | 4.319326908  | 1.57E-05 | 0.000323524 |
| MSI2      | 40.75860992 | -0.50991444  | 0.118071991 | -4.318674002 | 1.57E-05 | 0.000324134 |
| ANTXR2    | 190.3979487 | 0.463495502  | 0.107425887 | 4.314560641  | 1.60E-05 | 0.000329875 |
| SLC11A2   | 1178.009261 | 0.412635336  | 0.095705379 | 4.311516649  | 1.62E-05 | 0.000334092 |

|          |             |              |             |              |          |             |
|----------|-------------|--------------|-------------|--------------|----------|-------------|
| TBC1D8   | 317.4634065 | -0.475229786 | 0.110264598 | -4.309903586 | 1.63E-05 | 0.000336179 |
| ASTL     | 62.843944   | 0.726212658  | 0.168544016 | 4.308741861  | 1.64E-05 | 0.000337229 |
| LRMP     | 39.98255133 | -0.887460292 | 0.205963459 | -4.30882398  | 1.64E-05 | 0.000337229 |
| FEM1C    | 151.2279987 | 0.319532769  | 0.074199435 | 4.306404364  | 1.66E-05 | 0.000340447 |
| SEMA6B   | 2366.822054 | -0.577585396 | 0.134225655 | -4.303092415 | 1.68E-05 | 0.000345211 |
| CD300A   | 317.027019  | 0.415136185  | 0.09651746  | 4.301151163  | 1.70E-05 | 0.000347879 |
| KIF16B   | 399.9112615 | -0.305378384 | 0.071015977 | -4.300136357 | 1.71E-05 | 0.000349105 |
| PSAP     | 77407.70055 | -0.266411072 | 0.061997964 | -4.297093898 | 1.73E-05 | 0.000353528 |
| STOM     | 4206.911811 | 0.289611195  | 0.067400414 | 4.296875628  | 1.73E-05 | 0.000353528 |
| ZFAND5   | 4379.023501 | 0.324797973  | 0.075604301 | 4.296025084  | 1.74E-05 | 0.000354511 |
| SQRDL    | 2092.955301 | 0.282167874  | 0.065703561 | 4.294559869  | 1.75E-05 | 0.000356483 |
| NUS1     | 1772.467491 | 0.391180808  | 0.091100317 | 4.293956617  | 1.76E-05 | 0.000357076 |
| LOC40139 | 794.4169302 | 0.31137221   | 0.072557011 | 4.291414538  | 1.78E-05 | 0.000360808 |
| GPR85    | 76.08422728 | 0.667730636  | 0.155638395 | 4.290269364  | 1.78E-05 | 0.000362291 |
| GNGT2    | 30.83306178 | -0.99115656  | 0.231106071 | -4.288751729 | 1.80E-05 | 0.000364391 |
| HIF1A    | 2210.59553  | -0.249928317 | 0.058298878 | -4.28701761  | 1.81E-05 | 0.00036686  |
| ADM      | 1454.872909 | 0.547160902  | 0.127663584 | 4.285959132  | 1.82E-05 | 0.000368224 |
| SSPN     | 22.1569046  | -1.106469501 | 0.258322021 | -4.283295313 | 1.84E-05 | 0.000372271 |
| NRP1     | 4303.183349 | 0.278455966  | 0.065023253 | 4.282405978  | 1.85E-05 | 0.000373371 |
| ACP6     | 95.34546798 | -0.580804226 | 0.135712397 | -4.279669654 | 1.87E-05 | 0.000377595 |
| RPS6KA2  | 475.2754318 | -0.382154459 | 0.089308177 | -4.279053394 | 1.88E-05 | 0.000378246 |
| TTC4     | 1052.940885 | 0.328973943  | 0.076930514 | 4.276247845  | 1.90E-05 | 0.000382642 |
| VCAN     | 71.80134858 | 0.987159889  | 0.230972583 | 4.273926706  | 1.92E-05 | 0.000386245 |
| PLBD2    | 1610.248573 | -0.348519496 | 0.081557228 | -4.273312166 | 1.93E-05 | 0.000386908 |
| SCN1B    | 29.90494398 | 1.035588528  | 0.242401595 | 4.272201794  | 1.94E-05 | 0.000388435 |
| ITGB8    | 4079.486615 | 0.488569759  | 0.114418387 | 4.270028376  | 1.95E-05 | 0.000391832 |
| CTBS     | 504.3465843 | -0.234115462 | 0.054868389 | -4.266855013 | 1.98E-05 | 0.000397032 |
| FAM19A4  | 13.61623197 | -0.857519224 | 0.200996884 | -4.266330926 | 1.99E-05 | 0.000397552 |
| NTPCR    | 126.6402398 | -0.276756818 | 0.064901956 | -4.264229232 | 2.01E-05 | 0.000400896 |
| MCOLN1   | 2246.847273 | 0.267684773  | 0.062852229 | 4.258954358  | 2.05E-05 | 0.000410047 |
| CORO6    | 10.24172468 | -1.211844727 | 0.284727674 | -4.25615364  | 2.08E-05 | 0.000414785 |
| ACOT13   | 1538.957492 | -0.318331213 | 0.074818099 | -4.25473535  | 2.09E-05 | 0.000416991 |
| TOMM34   | 379.6180255 | 0.285477588  | 0.067182785 | 4.249266974  | 2.14E-05 | 0.00042686  |
| CUTA     | 442.0547365 | -0.239742128 | 0.056431042 | -4.248408708 | 2.15E-05 | 0.000428056 |
| GPRC5B   | 28.97182991 | 0.885270345  | 0.208630962 | 4.243235697  | 2.20E-05 | 0.000437596 |
| TTYH3    | 1141.320896 | -0.29510912  | 0.069562061 | -4.242386079 | 2.21E-05 | 0.000438804 |
| MICA     | 255.9578088 | 0.3203199    | 0.075562752 | 4.239124341  | 2.24E-05 | 0.00044477  |
| HMGN4    | 188.2577324 | -0.336505322 | 0.079494287 | -4.233075519 | 2.31E-05 | 0.000456438 |
| LOC28307 | 169.3099999 | -0.45034682  | 0.106440488 | -4.230972898 | 2.33E-05 | 0.000459781 |
| TRIM56   | 139.7162745 | 0.350881032  | 0.082929367 | 4.231082986  | 2.33E-05 | 0.000459781 |
| CD99     | 3059.361282 | -0.143894742 | 0.034018725 | -4.229868718 | 2.34E-05 | 0.00046157  |
| CES1     | 23342.11392 | -0.252480692 | 0.059733852 | -4.226760602 | 2.37E-05 | 0.000467032 |
| LPCAT2   | 1163.494105 | -0.210721465 | 0.049853717 | -4.226795466 | 2.37E-05 | 0.000467032 |
| CPE      | 466.0978349 | -0.396758878 | 0.093957296 | -4.222757516 | 2.41E-05 | 0.000474922 |
| DST      | 767.788455  | -0.195182524 | 0.046224224 | -4.222515965 | 2.42E-05 | 0.000474947 |
| ELMSAN1  | 261.3562136 | -0.246837325 | 0.058485396 | -4.22049508  | 2.44E-05 | 0.000478551 |
| RTN4R    | 27.56986658 | -0.930570053 | 0.220495798 | -4.220352775 | 2.44E-05 | 0.000478551 |

|          |             |              |             |              |          |             |
|----------|-------------|--------------|-------------|--------------|----------|-------------|
| FPR1     | 115.4887873 | -0.793472162 | 0.188173879 | -4.216696632 | 2.48E-05 | 0.000485667 |
| SNTA1    | 52.09768379 | -0.4972319   | 0.117923442 | -4.216565361 | 2.48E-05 | 0.000485667 |
| NTHL1    | 19.73768206 | -0.800408738 | 0.19003015  | -4.212009193 | 2.53E-05 | 0.000495066 |
| BLVRB    | 1737.825008 | -0.281602144 | 0.066906651 | -4.208881166 | 2.57E-05 | 0.00050146  |
| APBB1P   | 174.3315688 | -0.4356293   | 0.103723968 | -4.199890427 | 2.67E-05 | 0.000521264 |
| C2orf71  | 10.25972748 | 1.523796105  | 0.362994487 | 4.197849163  | 2.69E-05 | 0.000525451 |
| NPL      | 1413.056031 | -0.313608129 | 0.074722025 | -4.196997187 | 2.70E-05 | 0.000526897 |
| MACF1    | 983.4592382 | 0.228512881  | 0.054471325 | 4.195104123  | 2.73E-05 | 0.000530781 |
| SETD7    | 473.2457986 | -0.246454894 | 0.058770207 | -4.193534526 | 2.75E-05 | 0.000533929 |
| CDA      | 52.7870993  | -0.601148142 | 0.143393181 | -4.192306344 | 2.76E-05 | 0.000536288 |
| NBEAL2   | 193.0017536 | -0.533910619 | 0.127381108 | -4.191442728 | 2.77E-05 | 0.000537791 |
| RHOC     | 3597.640899 | 0.295221403  | 0.070445201 | 4.190795095  | 2.78E-05 | 0.000538786 |
| MTMR9    | 263.7503533 | 0.291876618  | 0.069656202 | 4.190245922  | 2.79E-05 | 0.000539549 |
| MRAS     | 1309.333959 | 0.287924833  | 0.068716967 | 4.190010798  | 2.79E-05 | 0.000539566 |
| NDUFAF3  | 1190.529021 | -0.186272958 | 0.044467132 | -4.18900321  | 2.80E-05 | 0.000541424 |
| OR6K6    | 43.89441193 | -0.888096378 | 0.212060783 | -4.187933121 | 2.82E-05 | 0.000543437 |
| ALDH7A1  | 29.86174732 | -0.752116725 | 0.179644257 | -4.186700641 | 2.83E-05 | 0.000545848 |
| ZNF207   | 1421.773558 | 0.273958525  | 0.065452846 | 4.185586137  | 2.84E-05 | 0.000547985 |
| NT5C3L   | 316.7547073 | -0.255618328 | 0.061143157 | -4.180653103 | 2.91E-05 | 0.000559451 |
| CALHM2   | 150.4620612 | -0.490473891 | 0.117377597 | -4.178598834 | 2.93E-05 | 0.000563964 |
| EPHX1    | 2292.184946 | -0.33207185  | 0.079474262 | -4.178357158 | 2.94E-05 | 0.000564001 |
| HECW2    | 6.351545872 | 1.489425763  | 0.356591199 | 4.176843865  | 2.96E-05 | 0.000567199 |
| IFIH1    | 456.613956  | 0.606394393  | 0.145204384 | 4.176143831  | 2.96E-05 | 0.00056838  |
| FMNL3    | 3174.249917 | 0.279723138  | 0.067000295 | 4.174953806  | 2.98E-05 | 0.000570792 |
| IRF2BPL  | 797.1642331 | 0.291977736  | 0.070003977 | 4.170873564  | 3.03E-05 | 0.000580533 |
| STARD10  | 268.6752807 | -0.291538954 | 0.069995491 | -4.165110499 | 3.11E-05 | 0.000594803 |
| NCK1     | 468.7182594 | -0.379240079 | 0.091134293 | -4.161332323 | 3.16E-05 | 0.000604132 |
| SAC3D1   | 16.96040343 | -0.942080615 | 0.226410096 | -4.160947902 | 3.17E-05 | 0.000604551 |
| MPZL2    | 47.13010966 | -0.930669979 | 0.223747809 | -4.15945964  | 3.19E-05 | 0.000607901 |
| HIST1H4E | 585.5568304 | -0.356555392 | 0.085771582 | -4.157034095 | 3.22E-05 | 0.000613782 |
| DUSP23   | 644.9963291 | -0.347587721 | 0.08362546  | -4.156482023 | 3.23E-05 | 0.000614659 |
| PDE6G    | 116.520702  | -0.553178619 | 0.13316765  | -4.154001507 | 3.27E-05 | 0.000620751 |
| ATPAF1   | 147.804691  | -0.272657775 | 0.065731181 | -4.148073603 | 3.35E-05 | 0.000636413 |
| CTNBL1   | 965.2875882 | 0.388991407  | 0.093790997 | 4.147427986  | 3.36E-05 | 0.000636955 |
| SLC46A2  | 37.60240993 | -0.885310375 | 0.213458562 | -4.147457783 | 3.36E-05 | 0.000636955 |
| TNFSF13  | 293.5258559 | 0.791787935  | 0.191045806 | 4.144492628  | 3.41E-05 | 0.000644535 |
| FAM50B   | 19.14101433 | -0.73168579  | 0.176564995 | -4.144002546 | 3.41E-05 | 0.00064528  |
| FNDC3A   | 1205.353513 | 0.344952305  | 0.083283107 | 4.141924055  | 3.44E-05 | 0.000650519 |
| MARCKS   | 531.3187144 | 0.50734949   | 0.122621445 | 4.137526582  | 3.51E-05 | 0.000662459 |
| NCR3LG1  | 63.03768361 | 0.483878985  | 0.117004003 | 4.135576326  | 3.54E-05 | 0.000667457 |
| SLC43A3  | 4973.351608 | 0.372757854  | 0.090161624 | 4.134329391  | 3.56E-05 | 0.000670435 |
| PSMA3    | 204.3672659 | 0.453451624  | 0.109783764 | 4.130406989  | 3.62E-05 | 0.000681312 |
| GOLT1B   | 840.8014681 | 0.276162544  | 0.066888798 | 4.128681502  | 3.65E-05 | 0.000685774 |
| H2AFY    | 2330.626323 | -0.375606092 | 0.090980154 | -4.12843982  | 3.65E-05 | 0.000685826 |
| OAS3     | 1015.577093 | 0.616340314  | 0.149495691 | 4.122796516  | 3.74E-05 | 0.000702168 |
| CXCL6    | 12.21635332 | 2.106798884  | 0.511199286 | 4.121286825  | 3.77E-05 | 0.000706099 |
| H2AFV    | 1353.017307 | -0.27588512  | 0.066950732 | -4.120718473 | 3.78E-05 | 0.000707155 |

|          |             |              |             |              |          |             |
|----------|-------------|--------------|-------------|--------------|----------|-------------|
| B3GNT1   | 18.63958512 | -0.726738285 | 0.176443539 | -4.118814933 | 3.81E-05 | 0.000712329 |
| CD163    | 2239.654622 | -0.255068045 | 0.06197495  | -4.115663615 | 3.86E-05 | 0.000721432 |
| PPP2R3A  | 257.1783535 | 0.288507396  | 0.070124201 | 4.114234355  | 3.88E-05 | 0.000725213 |
| LAMP3    | 82.48546006 | 0.721123731  | 0.175400139 | 4.1113065    | 3.93E-05 | 0.000733761 |
| ALCAM    | 2597.735879 | 0.26683379   | 0.064912715 | 4.11065522   | 3.95E-05 | 0.000735123 |
| GBP4     | 714.1789824 | 0.786818636  | 0.19147972  | 4.109148663  | 3.97E-05 | 0.000739219 |
| NAB2     | 269.7528134 | 0.465085322  | 0.113279173 | 4.105656054  | 4.03E-05 | 0.000749754 |
| NUDT6    | 34.46777325 | -0.717360648 | 0.174752654 | -4.105005744 | 4.04E-05 | 0.000751141 |
| CHST14   | 54.98078971 | -0.61068766  | 0.148861771 | -4.102380722 | 4.09E-05 | 0.000758985 |
| PEPD     | 2798.683946 | -0.2992452   | 0.072961176 | -4.101430574 | 4.11E-05 | 0.000761375 |
| RAB43    | 495.081231  | 0.285700821  | 0.069698606 | 4.099089443  | 4.15E-05 | 0.000768378 |
| MYO1B    | 13.348382   | 1.306498392  | 0.319072306 | 4.094678128  | 4.23E-05 | 0.000782402 |
| SPRY2    | 185.2202282 | 0.469450568  | 0.114740257 | 4.091419869  | 4.29E-05 | 0.000792717 |
| RNF125   | 26.72786278 | -0.770725351 | 0.188420336 | -4.090457372 | 4.31E-05 | 0.00079525  |
| ARHGEF16 | 11.68702428 | -0.970556736 | 0.237361001 | -4.088947776 | 4.33E-05 | 0.000798911 |
| GPBP1    | 699.9604591 | 0.18263424   | 0.044664232 | 4.089049113  | 4.33E-05 | 0.000798911 |
| YWHAZ    | 334.7568555 | 0.306372601  | 0.074954534 | 4.087445854  | 4.36E-05 | 0.00080333  |
| BAK1     | 729.8834563 | 0.356531934  | 0.087236608 | 4.086953214  | 4.37E-05 | 0.000804268 |
| CMPK2    | 464.1374418 | 0.779939833  | 0.190866902 | 4.086302147  | 4.38E-05 | 0.000805758 |
| TMEM194  | 130.2291701 | 0.956953509  | 0.234259047 | 4.085022629  | 4.41E-05 | 0.000809439 |
| IRF8     | 1651.031709 | 0.310302053  | 0.076097597 | 4.07768529   | 4.55E-05 | 0.000834608 |
| FSCN1    | 248.2402893 | 0.39500576   | 0.096915163 | 4.075789045  | 4.59E-05 | 0.000840639 |
| RASSF2   | 42.9167357  | -0.781124168 | 0.191832998 | -4.071896787 | 4.66E-05 | 0.000854001 |
| ST14     | 779.2351456 | -0.289444816 | 0.071179077 | -4.066431148 | 4.77E-05 | 0.000873439 |
| CKAP2    | 51.94066209 | -0.476899713 | 0.117377635 | -4.062952142 | 4.85E-05 | 0.000884884 |
| THBD     | 1595.542256 | 0.595721698  | 0.146622545 | 4.062961095  | 4.85E-05 | 0.000884884 |
| FTO      | 654.140407  | -0.229050034 | 0.056383843 | -4.062334532 | 4.86E-05 | 0.000885603 |
| MECR     | 39.50214188 | -0.488492735 | 0.120256209 | -4.062099896 | 4.86E-05 | 0.000885603 |
| SLC29A1  | 351.5845776 | -0.46841071  | 0.115307548 | -4.06227275  | 4.86E-05 | 0.000885603 |
| O3FAR1   | 148.5069262 | -0.612149739 | 0.150722981 | -4.061422713 | 4.88E-05 | 0.000887338 |
| SNTB1    | 986.276622  | -0.365732853 | 0.090093189 | -4.059495009 | 4.92E-05 | 0.000893851 |
| CCDC28B  | 18.74379599 | -0.874061549 | 0.215428454 | -4.057317085 | 4.96E-05 | 0.000901374 |
| CAMKK2   | 152.4097277 | -0.477100849 | 0.117667557 | -4.05465077  | 5.02E-05 | 0.000910858 |
| STARD4   | 57.38179792 | 0.497684252  | 0.12287495  | 4.050331271  | 5.11E-05 | 0.000926964 |
| CASC4    | 521.9261623 | -0.286211957 | 0.070677513 | -4.049547639 | 5.13E-05 | 0.000928429 |
| DUSP7    | 558.8602546 | 0.398628096  | 0.098438308 | 4.049522024  | 5.13E-05 | 0.000928429 |
| AKR1C3   | 1230.809764 | -0.452963417 | 0.111869169 | -4.049046068 | 5.14E-05 | 0.000929446 |
| SLC25A19 | 625.7810515 | -0.254937421 | 0.063021488 | -4.045245992 | 5.23E-05 | 0.000943767 |
| PER1     | 319.6684856 | 0.372211122  | 0.092034459 | 4.044258267  | 5.25E-05 | 0.000946867 |
| NUP188   | 1660.701471 | 0.366135769  | 0.090545452 | 4.043668221  | 5.26E-05 | 0.000948366 |
| TCEAL4   | 401.9577282 | -0.331166001 | 0.081910657 | -4.043014829 | 5.28E-05 | 0.000950125 |
| SPAG9    | 1947.208075 | 0.211243891  | 0.05228506  | 4.040234246  | 5.34E-05 | 0.000960563 |
| CNIH4    | 1033.082467 | 0.217742609  | 0.053896558 | 4.040009555  | 5.34E-05 | 0.000960587 |
| UBE2L6   | 949.7464022 | 0.50421486   | 0.124857573 | 4.038320197  | 5.38E-05 | 0.000966628 |
| DEPDC1B  | 10.76139636 | 1.078660595  | 0.267187128 | 4.037097912  | 5.41E-05 | 0.000970771 |
| MANF     | 1282.386287 | 0.357176787  | 0.08853221  | 4.034427555  | 5.47E-05 | 0.000980963 |
| RPL30    | 7025.292765 | -0.202828829 | 0.05028432  | -4.0336397   | 5.49E-05 | 0.000982432 |

|         |             |              |             |              |          |             |
|---------|-------------|--------------|-------------|--------------|----------|-------------|
| TMEM150 | 1994.700158 | 0.348723206  | 0.086451114 | 4.03376187   | 5.49E-05 | 0.000982432 |
| LDLRAD4 | 17.20209468 | -1.018344547 | 0.252531868 | -4.032538757 | 5.52E-05 | 0.000986132 |
| IFIT2   | 634.8932803 | 0.66758958   | 0.165616274 | 4.030941918  | 5.56E-05 | 0.000991936 |
| IFIT5   | 207.6108774 | 0.597458354  | 0.148258639 | 4.029838378  | 5.58E-05 | 0.000995681 |
| GDPD1   | 9.807915337 | -1.024926916 | 0.254352774 | -4.029548806 | 5.59E-05 | 0.000995986 |
| ANKZF1  | 101.6915201 | -0.323216962 | 0.080262784 | -4.026984197 | 5.65E-05 | 0.001005235 |
| SRCAP   | 798.5924641 | 0.225899435  | 0.056097035 | 4.026940719  | 5.65E-05 | 0.001005235 |
| PLAGL1  | 214.4899393 | 0.434091137  | 0.107807895 | 4.026524576  | 5.66E-05 | 0.001006086 |
| HAGHL   | 51.05557083 | -0.471447557 | 0.117129042 | -4.025027006 | 5.70E-05 | 0.001011576 |
| GPA33   | 42.59990477 | -0.711952506 | 0.176926501 | -4.024001505 | 5.72E-05 | 0.001015058 |
| FAM53B  | 203.498413  | -0.404392113 | 0.100537462 | -4.022302769 | 5.76E-05 | 0.001020483 |
| FDX1    | 3604.601859 | -0.248242847 | 0.061719754 | -4.022097156 | 5.77E-05 | 0.001020483 |
| IFIT1   | 146.6493269 | 0.98254252   | 0.244265286 | 4.022440256  | 5.76E-05 | 0.001020483 |
| WIPI2   | 1075.096092 | -0.243163918 | 0.060460813 | -4.021843316 | 5.77E-05 | 0.001020647 |
| CHCHD10 | 431.9885781 | -0.294745415 | 0.073298445 | -4.021168742 | 5.79E-05 | 0.001022636 |
| ETV7    | 11.27622318 | 1.952644971  | 0.486082436 | 4.017106621  | 5.89E-05 | 0.001039465 |
| ZNF792  | 38.91008005 | -0.490190349 | 0.122036707 | -4.016745135 | 5.90E-05 | 0.001040108 |
| KLHDC3  | 652.5416986 | -0.355921665 | 0.088756979 | -4.010069634 | 6.07E-05 | 0.001068978 |
| IDUA    | 134.9005344 | -0.415905409 | 0.103726668 | -4.009628546 | 6.08E-05 | 0.001069999 |
| IQGAP3  | 72.44187793 | -0.454481477 | 0.113365535 | -4.008991609 | 6.10E-05 | 0.00107191  |
| MFSD1   | 2058.834027 | -0.276553378 | 0.069005807 | -4.007682687 | 6.13E-05 | 0.001076884 |
| NLRP2   | 127.5640112 | 0.696700149  | 0.173857371 | 4.007308665  | 6.14E-05 | 0.001077608 |
| MRPL43  | 536.2321474 | -0.231109874 | 0.057681567 | -4.006650391 | 6.16E-05 | 0.001079631 |
| ARHGAP5 | 293.9473142 | 0.322773474  | 0.080563929 | 4.006426691  | 6.16E-05 | 0.001079671 |
| IFITM3  | 411.8585409 | 0.670076468  | 0.167290073 | 4.005476569  | 6.19E-05 | 0.001083036 |
| DAXX    | 1040.058692 | 0.331992161  | 0.082892359 | 4.005099659  | 6.20E-05 | 0.00108378  |
| SIGLEC7 | 43.61106184 | -0.585923797 | 0.14648942  | -3.999768697 | 6.34E-05 | 0.001107479 |
| BAZ1A   | 420.6924476 | 0.346267155  | 0.086630075 | 3.997077864  | 6.41E-05 | 0.001119124 |
| FICD    | 359.471088  | 0.313812238  | 0.078558847 | 3.994613591  | 6.48E-05 | 0.001129804 |
| AIFM3   | 27.85822408 | -0.697992811 | 0.174823536 | -3.992556302 | 6.54E-05 | 0.001138624 |
| LY86    | 919.0040534 | -0.398087691 | 0.099921261 | -3.98401388  | 6.78E-05 | 0.001179297 |
| HLA-DOA | 586.2919111 | 0.474026869  | 0.119039014 | 3.982113516  | 6.83E-05 | 0.001187696 |
| HLTF    | 144.8883437 | -0.481897744 | 0.121023596 | -3.981849486 | 6.84E-05 | 0.001187944 |
| FAM102A | 40.41973581 | -0.487112991 | 0.122504013 | -3.976302335 | 7.00E-05 | 0.001214888 |
| PLA2G4A | 166.6003537 | 0.429393875  | 0.10806428  | 3.973504225  | 7.08E-05 | 0.001227776 |
| ZCCHC24 | 78.68407365 | -0.602921601 | 0.1517409   | -3.973362497 | 7.09E-05 | 0.001227776 |
| ZNF385A | 914.3926461 | -0.333802755 | 0.084040564 | -3.971924239 | 7.13E-05 | 0.001234104 |
| SNRPA   | 626.8182749 | 0.296408008  | 0.074682055 | 3.968932164  | 7.22E-05 | 0.001248579 |
| TLR8    | 325.5808942 | -0.543913242 | 0.137094094 | -3.967444738 | 7.26E-05 | 0.001255268 |
| ADCY1   | 7.78367136  | -1.545018894 | 0.389576728 | -3.965891144 | 7.31E-05 | 0.001260659 |
| SLC46A3 | 322.8124918 | -0.538303827 | 0.135737045 | -3.965784181 | 7.32E-05 | 0.001260659 |
| USP30   | 211.0159926 | -0.391094625 | 0.098617272 | -3.965782245 | 7.32E-05 | 0.001260659 |
| CDK2AP1 | 461.3663737 | -0.355313333 | 0.089609942 | -3.96511061  | 7.34E-05 | 0.001263084 |
| CD69    | 58.0982609  | 0.818001084  | 0.206416343 | 3.962869769  | 7.41E-05 | 0.001273864 |
| PSMA2   | 1164.243037 | 0.367516553  | 0.092760112 | 3.962010663  | 7.43E-05 | 0.001277317 |
| ACAA1   | 594.4269968 | -0.353455218 | 0.089288836 | -3.958560052 | 7.54E-05 | 0.001294541 |
| QSOX1   | 3119.056606 | 0.25924315   | 0.065492126 | 3.958386514  | 7.55E-05 | 0.001294541 |

|           |             |              |             |              |             |             |
|-----------|-------------|--------------|-------------|--------------|-------------|-------------|
| TRIM36    | 121.286506  | 0.380207375  | 0.096079797 | 3.957204182  | 7.58E-05    | 0.001299806 |
| E2F7      | 2.87938941  | 2.145914426  | 0.542393542 | 3.956379015  | 7.61E-05    | 0.001303142 |
| HIVEP3    | 128.1528945 | 0.454045193  | 0.114855353 | 3.953191383  | 7.71E-05    | 0.001319459 |
| TMTC1     | 119.8627126 | 0.474899747  | 0.120163501 | 3.952113109  | 7.75E-05    | 0.001324244 |
| RARG      | 89.80370301 | 0.507564902  | 0.128463872 | 3.951032259  | 7.78E-05    | 0.001329061 |
| OLFML2B   | 19.36570263 | -0.88207027  | 0.223320422 | -3.949796726 | 7.82E-05    | 0.001334757 |
| NTN1      | 5.03784693  | 1.888378931  | 0.478283295 | 3.948243544  | 7.87E-05    | 0.001342255 |
| PROCR     | 220.955792  | 0.403357592  | 0.102168835 | 3.94795138   | 7.88E-05    | 0.001342706 |
| GAB1      | 155.8318622 | -0.276716657 | 0.070101294 | -3.947382992 | 7.90E-05    | 0.001344707 |
| TERF2IP   | 693.9212588 | 0.186320878  | 0.047228504 | 3.945093771  | 7.98E-05    | 0.001356421 |
| MAOB      | 7.420048451 | 1.922223658  | 0.487815191 | 3.940475191  | 8.13E-05    | 0.001381586 |
| ARL6IP4   | 380.0583446 | -0.33067894  | 0.083941082 | -3.93941718  | 8.17E-05    | 0.001385249 |
| UACA      | 298.6546993 | -0.274506044 | 0.06967906  | -3.93957731  | 8.16E-05    | 0.001385249 |
| ABCA7     | 15.07906674 | -0.971143426 | 0.24657395  | -3.938548353 | 8.20E-05    | 0.001389051 |
| COQ10B    | 685.5143187 | 0.293797182  | 0.074613662 | 3.937578916  | 8.23E-05    | 0.001393448 |
| CTNNAL1   | 44.56289796 | 0.679396075  | 0.172701613 | 3.933930111  | 8.36E-05    | 0.001413541 |
| CCDC106   | 95.38699874 | -0.607942482 | 0.154566272 | -3.933215664 | 8.38E-05    | 0.001415265 |
| SEMA7A    | 124.8388581 | 0.391025768  | 0.099413658 | 3.933320372  | 8.38E-05    | 0.001415265 |
| APMAP     | 637.0410486 | -0.301419809 | 0.076652232 | -3.932303094 | 8.41E-05    | 0.001418165 |
| DDX58     | 869.6807848 | 0.506009778  | 0.128677867 | 3.93237618   | 8.41E-05    | 0.001418165 |
| PTPN12    | 3705.261445 | 0.400005167  | 0.101805437 | 3.929114003  | 8.53E-05    | 0.001435846 |
| C5orf4    | 6.747829316 | -1.193236849 | 0.30396041  | -3.925632447 | 8.65E-05    | 0.001454547 |
| SLCO4A1   | 14.03449825 | 0.965853031  | 0.246040826 | 3.925580343  | 8.65E-05    | 0.001454547 |
| TMEM106   | 564.4767052 | 0.480797352  | 0.122493012 | 3.925100244  | 8.67E-05    | 0.001456181 |
| SNHG5     | 583.3094074 | -0.363159229 | 0.092538926 | -3.924394239 | 8.69E-05    | 0.001459185 |
| ADAR      | 4006.941164 | 0.260876508  | 0.066483729 | 3.923915086  | 8.71E-05    | 0.00146082  |
| NLN       | 569.1408838 | -0.331771559 | 0.084557689 | -3.923611954 | 8.72E-05    | 0.001461388 |
| TNFRSF12A | 385.5799564 | 0.338294816  | 0.086236792 | 3.922859477  | 8.75E-05    | 0.001464688 |
| AVIL      | 22.10070736 | 0.872186422  | 0.222347019 | 3.92263601   | 8.76E-05    | 0.001464775 |
| FBXW5     | 1020.016241 | -0.223198492 | 0.056913965 | -3.921682354 | 8.79E-05    | 0.00146931  |
| GUSB      | 516.179774  | -0.361455562 | 0.092193288 | -3.920627746 | 8.83E-05    | 0.001474477 |
| FLJ39639  | 9.956720502 | -1.179147051 | 0.300930596 | -3.91833554  | 8.92E-05    | 0.001487277 |
| ATN1      | 1420.822144 | 0.270464509  | 0.069089188 | 3.914715417  | 9.05E-05    | 0.001508463 |
| NDEL1     | 314.0384189 | 0.391718932  | 0.100100223 | 3.913267329  | 9.11E-05    | 0.00151623  |
| PELO      | 602.7016354 | 0.349186898  | 0.089288162 | 3.910786035  | 9.20E-05    | 0.001529249 |
| RNF113A   | 151.3736819 | -0.283295497 | 0.072439093 | -3.910809537 | 9.20E-05    | 0.001529249 |
| CD52      | 8775.943444 | -0.337745035 | 0.086464707 | -3.906160658 | 9.38E-05    | 0.00155746  |
| RBP1      | 52.1155459  | -0.80110272  | 0.205206797 | -3.903880054 | 9.47E-05    | 0.001570863 |
| HN1       | 775.9675373 | -0.315340187 | 0.080801422 | -3.902656402 | 9.51E-05    | 0.001576366 |
| SMURF1    | 462.1464674 | 0.292461861  | 0.074939921 | 3.902617667  | 9.52E-05    | 0.001576366 |
| ZDHHC24   | 323.141759  | -0.250224274 | 0.064145206 | -3.900903756 | 9.58E-05    | 0.001586205 |
| TMEM88    | 16.10019146 | 0.89083921   | 0.228435902 | 3.899733804  | 9.63E-05    | 0.001592521 |
| ISCU      | 1586.99441  | -0.177249491 | 0.045570169 | -3.889594816 | 0.000100412 | 0.001659119 |
| C1orf53   | 9.857473497 | -1.121834579 | 0.288456718 | -3.889091528 | 0.00010062  | 0.001659716 |
| RAB4B     | 404.8393384 | 0.352431189  | 0.090619104 | 3.889148915  | 0.000100596 | 0.001659716 |
| LAMB2     | 70.05531207 | -0.473309931 | 0.121750737 | -3.88753238  | 0.000101268 | 0.001668981 |
| PRPF3     | 67.15816177 | 0.57433472   | 0.147750398 | 3.887195758  | 0.000101409 | 0.001669868 |

|           |             |              |             |              |             |             |
|-----------|-------------|--------------|-------------|--------------|-------------|-------------|
| BAZ2B     | 203.9339681 | 0.315329934  | 0.081137358 | 3.886371732  | 0.000101754 | 0.001674113 |
| ZNFX1     | 1023.135651 | 0.376397014  | 0.096899061 | 3.884423763  | 0.000102573 | 0.001686151 |
| CDR2      | 157.1743972 | -0.353033932 | 0.090896815 | -3.883897705 | 0.000102795 | 0.001688365 |
| C19orf24  | 646.5217059 | -0.202729093 | 0.052212783 | -3.882748306 | 0.000103282 | 0.001693481 |
| MLX       | 2853.765393 | 0.218826766  | 0.056357121 | 3.882859233  | 0.000103235 | 0.001693481 |
| ATP13A2   | 454.5927613 | -0.493563004 | 0.127129352 | -3.882368597 | 0.000103444 | 0.001694686 |
| DEFB1     | 106.3747105 | -0.469980483 | 0.12118567  | -3.878185298 | 0.000105239 | 0.001721159 |
| IGFBP2    | 793.4410343 | -0.444651395 | 0.114652696 | -3.878246322 | 0.000105212 | 0.001721159 |
| ARL4C     | 28.91858618 | -0.959915347 | 0.247579206 | -3.877205043 | 0.000105663 | 0.001726641 |
| UBASH3B   | 1492.977266 | -0.407547225 | 0.105125683 | -3.876761736 | 0.000105856 | 0.001728322 |
| GLS       | 3425.169499 | 0.255947587  | 0.066060746 | 3.874427735  | 0.000106876 | 0.00174318  |
| LRP12     | 151.2452675 | 0.756134765  | 0.195168557 | 3.874265275  | 0.000106947 | 0.00174318  |
| ACTN1     | 4644.555846 | 0.391188316  | 0.101014621 | 3.872591018  | 0.000107684 | 0.001753718 |
| IGFN1     | 6.764172492 | 1.727211864  | 0.446611993 | 3.867365614  | 0.000110017 | 0.001790199 |
| C14orf1   | 254.4481005 | -0.373791002 | 0.09668848  | -3.865931094 | 0.000110666 | 0.001799236 |
| PBX3      | 469.5137785 | -0.310649591 | 0.080429325 | -3.862392129 | 0.000112282 | 0.00182397  |
| PNRC2     | 3183.886708 | 0.182750283  | 0.047356818 | 3.859006799  | 0.000113849 | 0.001847861 |
| PCYOX1L   | 67.29328866 | -0.432130296 | 0.112036149 | -3.85706131  | 0.000114758 | 0.001861056 |
| PFKP      | 461.3624438 | 0.366650532  | 0.095066018 | 3.856799102  | 0.000114882 | 0.001861486 |
| CCR1      | 233.2798935 | 0.473358028  | 0.122758838 | 3.85599958   | 0.000115258 | 0.001866012 |
| GABARAPL  | 849.6193203 | 0.263126758  | 0.068265682 | 3.85445145   | 0.000115989 | 0.001876282 |
| LOC54147  | 217.8099076 | 0.629964398  | 0.163649607 | 3.849470898  | 0.000118373 | 0.001913237 |
| VGLL4     | 167.1853063 | -0.345049075 | 0.089738391 | -3.845055267 | 0.000120525 | 0.001946387 |
| RPL21     | 8167.009117 | -0.210468272 | 0.054750313 | -3.844147413 | 0.000120972 | 0.00195197  |
| TRIM62    | 56.70704925 | -0.412936469 | 0.107484392 | -3.841827283 | 0.000122122 | 0.001968868 |
| PLK1S1    | 59.28208319 | -0.55058547  | 0.143345659 | -3.840963693 | 0.000122552 | 0.001974157 |
| RNF168    | 262.1901252 | -0.391548987 | 0.101974235 | -3.839685444 | 0.000123192 | 0.001982805 |
| ST3GAL5   | 62.84892214 | 0.415793322  | 0.108303644 | 3.839144329  | 0.000123464 | 0.001985521 |
| CENPN     | 197.7185344 | 0.387565575  | 0.101014426 | 3.836734897  | 0.000124681 | 0.002003422 |
| HSPA13    | 719.727465  | 0.345375496  | 0.090070812 | 3.834488538  | 0.000125826 | 0.002020134 |
| GPX4      | 8236.659091 | -0.249000464 | 0.065061492 | -3.827155777 | 0.000129632 | 0.002079517 |
| DNMT3A    | 106.2938893 | 0.484740039  | 0.126782851 | 3.823388068  | 0.00013163  | 0.002109809 |
| GALC      | 461.9807995 | -0.357714484 | 0.09367349  | -3.818737647 | 0.000134136 | 0.002148188 |
| NIN       | 250.3454908 | -0.337882979 | 0.08862349  | -3.81256684  | 0.000137531 | 0.002197075 |
| RWDD3     | 119.6092136 | -0.322549714 | 0.084600273 | -3.812632057 | 0.000137495 | 0.002197075 |
| USP15     | 440.854851  | 0.332530774  | 0.08721039  | 3.812972     | 0.000137306 | 0.002197075 |
| CPPED1    | 218.1942385 | -0.305780159 | 0.080233666 | -3.811120389 | 0.000138338 | 0.002208142 |
| LINC00032 | 8.812176678 | 1.208438687  | 0.317115578 | 3.810720037  | 0.000138563 | 0.00220989  |
| AK4       | 326.0961391 | 0.397120817  | 0.104267289 | 3.808680741  | 0.00013971  | 0.00222635  |
| TRAF3IP2  | 652.9157663 | 0.305083701  | 0.080131259 | 3.807299469  | 0.000140493 | 0.002236967 |
| LPAR1     | 884.3477387 | 0.384315241  | 0.100991247 | 3.805431194  | 0.000141557 | 0.00225206  |
| S100A4    | 3933.416464 | -0.360772562 | 0.094876283 | -3.802557906 | 0.00014321  | 0.002276468 |
| PSAT1     | 113.2909884 | -0.507270269 | 0.133481029 | -3.800317352 | 0.000144511 | 0.002295257 |
| OTUD1     | 890.6646572 | 0.260362317  | 0.068524488 | 3.799551442  | 0.000144958 | 0.002300465 |
| SEC24D    | 803.9923273 | 0.195422488  | 0.05146862  | 3.796924975  | 0.000146502 | 0.002323053 |
| GALM      | 76.17230564 | -0.548098132 | 0.144374856 | -3.796354474 | 0.000146839 | 0.002324577 |
| TNFRSF1B  | 1267.414128 | 0.330863385  | 0.087150616 | 3.796454919  | 0.00014678  | 0.002324577 |

|          |             |              |             |              |             |             |
|----------|-------------|--------------|-------------|--------------|-------------|-------------|
| C2orf66  | 7.253831915 | 1.585388807  | 0.417717311 | 3.79536295   | 0.000147428 | 0.002331971 |
| XIRP1    | 6.711631799 | 2.319885819  | 0.611299325 | 3.795007983  | 0.000147639 | 0.002333394 |
| IBTK     | 379.7547546 | 0.321609124  | 0.084766071 | 3.794078484  | 0.000148193 | 0.002340232 |
| BAIAP2L1 | 19.46506506 | 0.845081513  | 0.223200778 | 3.786194302  | 0.000152972 | 0.002409779 |
| C10orf11 | 241.687843  | -0.370347113 | 0.097810645 | -3.786368166 | 0.000152865 | 0.002409779 |
| DPH1     | 122.3149935 | -0.407413556 | 0.107596227 | -3.786504115 | 0.000152782 | 0.002409779 |
| ATP13A3  | 4122.438823 | 0.357415303  | 0.094405409 | 3.785962118  | 0.000153115 | 0.00241006  |
| NCOA3    | 830.1000307 | 0.213423674  | 0.056384753 | 3.785130958  | 0.000153628 | 0.002416155 |
| INPP1    | 145.8354897 | 0.389441151  | 0.10290644  | 3.784419622  | 0.000154068 | 0.0024211   |
| FAM173A  | 187.1833028 | -0.364761403 | 0.096470553 | -3.781064686 | 0.000156159 | 0.002451965 |
| APRT     | 1475.865972 | -0.318515456 | 0.084312319 | -3.777804496 | 0.000158217 | 0.002480434 |
| TAB2     | 1114.419032 | 0.295691939  | 0.078271257 | 3.777784481  | 0.00015823  | 0.002480434 |
| SAR1A    | 1145.038148 | 0.178084844  | 0.047163185 | 3.775929118  | 0.000159412 | 0.002496941 |
| EXOSC5   | 138.7180704 | -0.341341604 | 0.090445132 | -3.774018516 | 0.000160639 | 0.002514109 |
| S100A9   | 227.8850875 | -0.453515858 | 0.120365574 | -3.767820347 | 0.000164679 | 0.00257525  |
| C16orf13 | 98.49081988 | -0.469731335 | 0.124719034 | -3.766316322 | 0.000165674 | 0.002588705 |
| NOTCH2NL | 883.4311712 | -0.2636959   | 0.070061917 | -3.763755149 | 0.000167381 | 0.002613256 |
| POPDC3   | 22.45589174 | 1.235288778  | 0.328376217 | 3.761809512  | 0.000168689 | 0.002631541 |
| PLAUR    | 21274.85991 | 0.236633393  | 0.062978623 | 3.757360566  | 0.000171715 | 0.002676587 |
| CD55     | 95.67764884 | 0.378517197  | 0.100813056 | 3.754644616  | 0.000173588 | 0.002703588 |
| CCNDBP1  | 1412.913289 | -0.198125628 | 0.052786567 | -3.753334213 | 0.000174498 | 0.002715572 |
| BCOR     | 257.9306016 | 0.358486115  | 0.095538195 | 3.752280614  | 0.000175233 | 0.002724812 |
| ATP2B4   | 282.7301759 | -0.360315135 | 0.096062634 | -3.750835474 | 0.000176246 | 0.002738356 |
| RPS23    | 7013.323956 | -0.267917453 | 0.071459741 | -3.749208262 | 0.000177394 | 0.002753963 |
| SDHA     | 395.0150954 | -0.228995693 | 0.061098356 | -3.747984538 | 0.000178261 | 0.002765202 |
| MCTP1    | 406.7193304 | 0.298140965  | 0.079569801 | 3.746911033  | 0.000179026 | 0.002774824 |
| FAM126B  | 309.6792717 | 0.397357563  | 0.106057445 | 3.746625846  | 0.000179229 | 0.002775746 |
| SLC2A4RG | 133.9468862 | -0.287486985 | 0.076738978 | -3.74629675  | 0.000179464 | 0.002777156 |
| GABARAPL | 1628.281693 | -0.157518557 | 0.042049574 | -3.746020278 | 0.000179662 | 0.002777985 |
| TRAPPC5  | 523.8536174 | -0.274690577 | 0.073420464 | -3.741335317 | 0.000183045 | 0.002828025 |
| PDE4A    | 694.9150123 | 0.328728369  | 0.087901307 | 3.739743815  | 0.000184208 | 0.002843709 |
| ZNF134   | 40.30767055 | -0.41615279  | 0.111425081 | -3.734821505 | 0.000187848 | 0.002897587 |
| TMEM14A  | 230.1871084 | -0.344173508 | 0.092161903 | -3.734444448 | 0.00018813  | 0.00289961  |
| ZNF808   | 319.5268057 | 0.256590281  | 0.068724166 | 3.733625265  | 0.000188743 | 0.002906737 |
| TWSG1    | 964.800701  | 0.236453751  | 0.06336987  | 3.731327722  | 0.000190473 | 0.002931036 |
| CD72     | 45.05880612 | -0.682961722 | 0.183110211 | -3.729785018 | 0.000191643 | 0.002946686 |
| ADAP1    | 505.8290598 | 0.504034832  | 0.13515283  | 3.729369411  | 0.00019196  | 0.002949197 |
| C16orf88 | 71.07398418 | -0.43911948  | 0.117844304 | -3.72626819  | 0.000194336 | 0.002980948 |
| MAPK6    | 1111.63873  | 0.422080572  | 0.113265699 | 3.726464188  | 0.000194185 | 0.002980948 |
| SHISA4   | 106.2464295 | -0.350932016 | 0.094192901 | -3.725673718 | 0.000194794 | 0.002985605 |
| USP18    | 88.04965744 | 0.793747549  | 0.213152685 | 3.723844941  | 0.000196211 | 0.003004936 |
| SNRK     | 142.967135  | 0.326355744  | 0.08764608  | 3.723563498  | 0.00019643  | 0.003005754 |
| TUBE1    | 296.6022718 | 0.383381092  | 0.102966004 | 3.723375468  | 0.000196577 | 0.003005754 |
| HMGXB3   | 382.0557326 | 0.260578568  | 0.070033224 | 3.720784999  | 0.000198604 | 0.003034349 |
| SLMO2    | 1008.506761 | 0.220518729  | 0.05930449  | 3.718415415  | 0.000200476 | 0.003058098 |
| TDG      | 580.7224405 | 0.297397747  | 0.079975543 | 3.718608677  | 0.000200323 | 0.003058098 |
| CTDSP1   | 1076.687082 | -0.177005658 | 0.047665664 | -3.713483482 | 0.000204426 | 0.003113413 |

|           |             |              |             |              |             |             |
|-----------|-------------|--------------|-------------|--------------|-------------|-------------|
| TSPYL2    | 242.3759574 | 0.290014039  | 0.078095867 | 3.713564478  | 0.00020436  | 0.003113413 |
| IL1R2     | 5.972537666 | -1.39193332  | 0.374854239 | -3.713265515 | 0.000204602 | 0.003113636 |
| BPHL      | 79.9347476  | -0.413017993 | 0.11128789  | -3.711257293 | 0.000206232 | 0.003135969 |
| TSC22D3   | 535.3453512 | -0.285029064 | 0.07681748  | -3.710471438 | 0.000206874 | 0.003143239 |
| STAB1     | 13.0473349  | -1.065933926 | 0.287432872 | -3.708462153 | 0.000208522 | 0.003165785 |
| CCNG2     | 175.1023826 | -0.342783502 | 0.092598086 | -3.7018422   | 0.00021404  | 0.003247    |
| MILR1     | 728.9177876 | -0.239431366 | 0.064704111 | -3.700404249 | 0.000215256 | 0.003262886 |
| JPH4      | 7.957128951 | -1.084377602 | 0.29305909  | -3.700201216 | 0.000215429 | 0.00326293  |
| CDKN2C    | 27.79942808 | -0.469342513 | 0.126880606 | -3.699087897 | 0.000216376 | 0.0032747   |
| ZNF420    | 107.148534  | -0.302136411 | 0.081694165 | -3.698384201 | 0.000216976 | 0.003281213 |
| UTP6      | 800.6401333 | 0.18943173   | 0.051250543 | 3.696189707  | 0.000218859 | 0.003307095 |
| ICAM1     | 1840.561485 | 0.683407651  | 0.184915582 | 3.695781852  | 0.000219211 | 0.003309813 |
| SLC16A1   | 276.5121557 | -0.25199391  | 0.06819758  | -3.695056471 | 0.000219838 | 0.003315011 |
| TRERF1    | 70.26219936 | -0.642396119 | 0.173856205 | -3.694985282 | 0.0002199   | 0.003315011 |
| EBF1      | 3.238862711 | 2.166816381  | 0.586460763 | 3.694733762  | 0.000220117 | 0.0033157   |
| GCA       | 305.2948882 | 0.443130853  | 0.119964638 | 3.693845617  | 0.000220888 | 0.003324709 |
| RPL38     | 4585.089232 | -0.217200988 | 0.058810432 | -3.693239114 | 0.000221416 | 0.00333005  |
| MGST2     | 504.6560886 | -0.358992471 | 0.097211782 | -3.692890547 | 0.000221719 | 0.003332018 |
| C6orf106  | 2468.519444 | 0.243676468  | 0.066003469 | 3.691873669  | 0.000222608 | 0.003340651 |
| MTA3      | 111.7911258 | -0.338518633 | 0.091693835 | -3.691836355 | 0.000222641 | 0.003340651 |
| SRXN1     | 2698.591394 | 0.279231342  | 0.075640366 | 3.691565173  | 0.000222878 | 0.003341613 |
| GALNT11   | 261.9860425 | -0.314007363 | 0.0850705   | -3.691142808 | 0.000223249 | 0.003344565 |
| C17orf58  | 161.2116346 | 0.423704681  | 0.114845598 | 3.689341949  | 0.000224835 | 0.00336571  |
| ADAM28    | 12.67019477 | -1.245064284 | 0.337641909 | -3.687528861 | 0.000226442 | 0.003387143 |
| SIGLEC10  | 92.14084003 | -0.432167196 | 0.117206086 | -3.687241926 | 0.000226698 | 0.003388332 |
| CXorf38   | 129.4011083 | 0.321565704  | 0.087227573 | 3.686514393  | 0.000227347 | 0.003395395 |
| NUDT9     | 342.0558484 | -0.215547807 | 0.058507746 | -3.684090081 | 0.000229521 | 0.003425215 |
| FBXL15    | 266.9463612 | -0.353213093 | 0.095950497 | -3.681201268 | 0.000232138 | 0.003461582 |
| ABCB1     | 21.97836403 | 0.604671826  | 0.164308123 | 3.680109136  | 0.000233134 | 0.003473753 |
| SEMA3A    | 5.106222189 | 1.259409659  | 0.342384567 | 3.678348211  | 0.000234749 | 0.003495116 |
| KIAA0226L | 102.3240656 | 0.559489375  | 0.152161938 | 3.676933817  | 0.000236054 | 0.003511831 |
| GP1BA     | 69.16793599 | 0.751936684  | 0.204646951 | 3.674311694  | 0.000238491 | 0.003545352 |
| SNX21     | 72.12524356 | -0.462080614 | 0.125860489 | -3.67137152  | 0.000241252 | 0.00358363  |
| CXCR2     | 11.79522699 | -1.178954031 | 0.321437866 | -3.667750931 | 0.000244693 | 0.003631943 |
| AR        | 20.46835547 | 1.172974002  | 0.319962621 | 3.665971977  | 0.000246401 | 0.003654473 |
| PPP1R18   | 2226.524645 | 0.248551075  | 0.067810984 | 3.665351265  | 0.000246999 | 0.00366053  |
| PITPNB    | 1150.874093 | 0.194152107  | 0.0529825   | 3.664457247  | 0.000247864 | 0.003670516 |
| CEP350    | 631.2521559 | 0.232196171  | 0.063409275 | 3.661864479  | 0.000250386 | 0.003705025 |
| C1orf122  | 644.881362  | 0.435066619  | 0.118836957 | 3.661038034  | 0.000251195 | 0.003714146 |
| SERPINH1  | 670.657678  | 0.239105925  | 0.06534947  | 3.658880873  | 0.000253319 | 0.003742672 |
| GOLGA2    | 334.4250307 | 0.415886379  | 0.113720116 | 3.657104791  | 0.00025508  | 0.00376292  |
| SESN1     | 172.592292  | -0.354742808 | 0.096996773 | -3.657264035 | 0.000254922 | 0.00376292  |
| AIM2      | 64.74641057 | 0.812478004  | 0.222305476 | 3.654781775  | 0.000257401 | 0.00379425  |
| PEBP1     | 587.8072992 | -0.246501102 | 0.067463202 | -3.653860096 | 0.000258327 | 0.003804992 |
| FBRS      | 605.4665111 | 0.311941495  | 0.085439128 | 3.651037903  | 0.000261183 | 0.003844114 |
| PDE4DIP   | 2554.186611 | 0.200436624  | 0.054950052 | 3.647614801  | 0.000264686 | 0.003892704 |
| RAPGEF2   | 170.1918866 | 0.48803977   | 0.133824647 | 3.646860134  | 0.000265464 | 0.003901171 |

|           |             |              |             |              |             |             |
|-----------|-------------|--------------|-------------|--------------|-------------|-------------|
| TMEM160   | 214.3260155 | -0.339519509 | 0.093129224 | -3.645681724 | 0.000266684 | 0.003916106 |
| QPCTL     | 287.4520862 | -0.21603033  | 0.059272266 | -3.644711851 | 0.000267692 | 0.00392791  |
| CPQ       | 433.5092055 | -0.225599541 | 0.061902827 | -3.644414203 | 0.000268002 | 0.003929465 |
| DPP7      | 627.5206442 | -0.31423691  | 0.086248026 | -3.643409873 | 0.00026905  | 0.003941837 |
| LCN2      | 49.68068213 | 1.211477207  | 0.332572426 | 3.642747002  | 0.000269744 | 0.003949002 |
| GFRA2     | 12.88703292 | 1.091229845  | 0.299679379 | 3.64132444   | 0.000271239 | 0.003967875 |
| BTRC      | 170.2280174 | 0.233196156  | 0.064070688 | 3.639669888  | 0.000272988 | 0.003990427 |
| VSIG10    | 25.0812842  | -0.556047304 | 0.152862101 | -3.637574651 | 0.000275217 | 0.004019969 |
| BMP6      | 20.13476112 | 0.725842534  | 0.199652056 | 3.635537478  | 0.000277402 | 0.004048803 |
| ZNF530    | 9.24536979  | -0.945773162 | 0.260431517 | -3.631561855 | 0.000281711 | 0.004108589 |
| GBP3      | 545.0684044 | 0.470072223  | 0.12946123  | 3.630988401  | 0.000282338 | 0.004114615 |
| XBP1      | 818.1058031 | 0.283480924  | 0.078110859 | 3.629212723  | 0.000284287 | 0.004139888 |
| ZNF616    | 78.9095605  | -0.309436581 | 0.085270477 | -3.628882952 | 0.00028465  | 0.004142048 |
| RPL26     | 4551.342325 | -0.25113368  | 0.069220535 | -3.628022792 | 0.0002856   | 0.004152733 |
| EIF4EBP3  | 282.9141934 | -0.241559518 | 0.066625805 | -3.62561502  | 0.000288275 | 0.00418846  |
| EPT1      | 323.6962861 | 0.402558267  | 0.111047723 | 3.6250925    | 0.000288858 | 0.004193775 |
| LOC72875: | 26.28806165 | -0.66671026  | 0.183972227 | -3.623972335 | 0.000290113 | 0.004208818 |
| CYCS      | 1881.258296 | 0.24254413   | 0.066959254 | 3.622264511  | 0.000292035 | 0.004231447 |
| ZNF582-AS | 17.82568441 | -0.641531239 | 0.177111095 | -3.622196796 | 0.000292112 | 0.004231447 |
| SNAP29    | 571.951799  | -0.141620148 | 0.039102807 | -3.621738698 | 0.00029263  | 0.004235764 |
| LOC37444: | 150.6881627 | 0.513828309  | 0.142039149 | 3.617511883  | 0.000297449 | 0.004302287 |
| STX8      | 287.7585823 | -0.243994646 | 0.067465613 | -3.616577934 | 0.000298523 | 0.004314593 |
| PCED1A    | 188.6671142 | -0.351819543 | 0.097307645 | -3.615538585 | 0.000299724 | 0.004328695 |
| HS3ST2    | 13.52111147 | -1.077447415 | 0.298176744 | -3.613452214 | 0.000302147 | 0.004360423 |
| AFF2      | 10.96779674 | 0.836739138  | 0.231596134 | 3.612923594  | 0.000302764 | 0.004366055 |
| FUZ       | 58.99520627 | -0.399133498 | 0.110570924 | -3.609750945 | 0.000306491 | 0.004416498 |
| RGS16     | 69.92693479 | 0.527669122  | 0.146189867 | 3.609478091  | 0.000306814 | 0.004417842 |
| SOBP      | 13.94607725 | 1.011712712  | 0.280321139 | 3.609120296  | 0.000307237 | 0.004420635 |
| ARHGAP4   | 107.3613238 | -0.331740366 | 0.091993383 | -3.606132904 | 0.000310794 | 0.004468476 |
| RCSD1     | 159.409471  | 0.410595222  | 0.113921731 | 3.604187007  | 0.000313132 | 0.004496374 |
| UST       | 85.25047101 | 0.470525494  | 0.130551781 | 3.604129259  | 0.000313201 | 0.004496374 |
| NNT       | 414.847014  | -0.241716415 | 0.067088045 | -3.602973018 | 0.000314598 | 0.004513067 |
| ERCC1     | 137.2383933 | 0.417558069  | 0.115911251 | 3.602394653  | 0.000315299 | 0.004519758 |
| SAMD4B    | 436.4064145 | 0.287957793  | 0.079945876 | 3.601909262  | 0.000315889 | 0.00452484  |
| PIGK      | 318.9341369 | -0.233367228 | 0.064820359 | -3.600214964 | 0.000317954 | 0.004551044 |
| TRHDE     | 63.46393227 | -0.598998297 | 0.166415228 | -3.599419986 | 0.000318928 | 0.00456159  |
| ZNF568    | 41.77903942 | -0.498884448 | 0.138623965 | -3.598832626 | 0.000319649 | 0.004568512 |
| DHRS4-AS1 | 13.5064427  | -0.736261908 | 0.204718672 | -3.596457027 | 0.000322581 | 0.004607    |
| BTBD9     | 312.303307  | 0.219320353  | 0.060985675 | 3.596260163  | 0.000322825 | 0.004607071 |
| TAGAP     | 270.0383544 | 0.436227506  | 0.121335405 | 3.595220274  | 0.000324117 | 0.004622089 |
| MAPK7     | 150.4307575 | 0.28351125   | 0.078866757 | 3.594813105  | 0.000324625 | 0.004623485 |
| TRAPPC2L  | 1018.892199 | -0.249309211 | 0.069353573 | -3.594756551 | 0.000324695 | 0.004623485 |
| FHL3      | 198.7427048 | 0.342950927  | 0.095493073 | 3.591369659  | 0.000328945 | 0.004680538 |
| MLKL      | 356.0474471 | 0.415151611  | 0.115617452 | 3.590734818  | 0.000329747 | 0.004688491 |
| NGFRAP1   | 55.74870584 | -0.948702688 | 0.264268223 | -3.589923439 | 0.000330775 | 0.004699641 |
| PAPD7     | 125.5461685 | 0.347903709  | 0.096933123 | 3.589110698  | 0.000331808 | 0.004710841 |
| PKI55     | 58.84784823 | -0.596816527 | 0.166456575 | -3.585418754 | 0.000336538 | 0.004774475 |

|           |             |              |             |              |             |             |
|-----------|-------------|--------------|-------------|--------------|-------------|-------------|
| DEF6      | 80.47289833 | -0.477023954 | 0.133066499 | -3.584853872 | 0.000337267 | 0.004781299 |
| ANAPC13   | 513.1264451 | -0.172633744 | 0.048174912 | -3.58347811  | 0.000339049 | 0.004803031 |
| MICB      | 240.3972092 | 0.244857324  | 0.068338009 | 3.583032736  | 0.000339628 | 0.00480722  |
| SLC39A8   | 2716.957365 | 0.412865814  | 0.115233371 | 3.58286675   | 0.000339844 | 0.00480722  |
| FAM3B     | 119.645385  | -0.405119908 | 0.113107266 | -3.581731933 | 0.000341324 | 0.004818756 |
| MBOAT7    | 1049.668817 | 0.262643909  | 0.073330091 | 3.581666196  | 0.00034141  | 0.004818756 |
| OSBPL5    | 113.985986  | -0.392975183 | 0.109707924 | -3.582012753 | 0.000340957 | 0.004818756 |
| ABHD15    | 232.8479478 | -0.278677239 | 0.077843705 | -3.579958595 | 0.000343649 | 0.004843259 |
| NDRG2     | 46.53750121 | 0.579561115  | 0.161884398 | 3.580092469  | 0.000343473 | 0.004843259 |
| INPP5B    | 361.9102205 | 0.294529186  | 0.082304885 | 3.578514017  | 0.000345553 | 0.004866543 |
| AGRN      | 258.8782375 | 0.373701352  | 0.104519297 | 3.575429251  | 0.000349654 | 0.004920693 |
| DPF3      | 9.205968373 | 1.260649307  | 0.352699558 | 3.574286612  | 0.000351184 | 0.004938622 |
| H3F3B     | 10852.16809 | 0.207683019  | 0.058136451 | 3.57233739   | 0.000353809 | 0.004971909 |
| RND3      | 1022.428136 | 0.352118683  | 0.098590606 | 3.571523678  | 0.00035491  | 0.00498375  |
| MED13     | 1218.192885 | 0.251590739  | 0.070460831 | 3.570646773  | 0.000356101 | 0.004993731 |
| TMEM63B   | 550.4009537 | 0.413417018  | 0.115783035 | 3.570618249  | 0.00035614  | 0.004993731 |
| MBLAC2    | 21.08528021 | -0.683411173 | 0.191468521 | -3.569313473 | 0.000357918 | 0.005015016 |
| CHCHD6    | 19.10906903 | -0.606788705 | 0.17002876  | -3.568741578 | 0.0003587   | 0.005022322 |
| UBE2J1    | 1695.319355 | 0.209433239  | 0.058742099 | 3.565300583  | 0.000363439 | 0.005084985 |
| DERL1     | 949.2669101 | 0.283960832  | 0.079733435 | 3.561377128  | 0.000368915 | 0.005157846 |
| LOC10013: | 133.7481702 | 0.33877508   | 0.095136728 | 3.560928433  | 0.000369546 | 0.005162922 |
| PI4KB     | 754.8242816 | 0.254170458  | 0.071415405 | 3.559042471  | 0.000372209 | 0.005196366 |
| ZNF443    | 21.82641086 | -0.644126628 | 0.181005724 | -3.558598119 | 0.00037284  | 0.005201395 |
| SYNJ1     | 125.2676578 | 0.32391496   | 0.09103003  | 3.55833083   | 0.000373219 | 0.005202922 |
| NDUFA3    | 371.3738752 | -0.242568153 | 0.068189829 | -3.55724829  | 0.00037476  | 0.005220625 |
| FST       | 6.203164856 | 1.877638695  | 0.52828007  | 3.554248589  | 0.000379061 | 0.005276723 |
| GTPBP1    | 382.8274683 | 0.256618235  | 0.072217873 | 3.553389553  | 0.000380301 | 0.005290163 |
| C9orf89   | 399.4847809 | 0.355292642  | 0.100006686 | 3.552688886  | 0.000381315 | 0.005300446 |
| PELI2     | 48.99284568 | -0.495351427 | 0.139499162 | -3.550927614 | 0.000383876 | 0.005328592 |
| TMEM209   | 376.244413  | 0.293109206  | 0.082544678 | 3.550915848  | 0.000383893 | 0.005328592 |
| UBP1      | 580.5065531 | 0.167707615  | 0.047318459 | 3.544232426  | 0.000393758 | 0.005461584 |
| RAB11FIP1 | 1744.309432 | -0.185495272 | 0.052386973 | -3.540866368 | 0.000398816 | 0.005527755 |
| LOC10012: | 21.73651585 | -0.50186002  | 0.141744871 | -3.5405868   | 0.000399238 | 0.005529637 |
| EIF2AK2   | 805.6721609 | 0.466684102  | 0.131879825 | 3.538707328  | 0.000402091 | 0.005565153 |
| TBC1D10B  | 600.5603181 | 0.256866749  | 0.072601699 | 3.53802668   | 0.000403129 | 0.005575513 |
| SLC30A1   | 2341.362374 | 0.231764557  | 0.065639038 | 3.530895101  | 0.000414156 | 0.005723909 |
| SIGLEC11  | 141.3540603 | -0.321485365 | 0.09107796  | -3.529782249 | 0.000415902 | 0.005743917 |
| SNX18     | 214.2381469 | -0.293130468 | 0.083052235 | -3.529471149 | 0.000416391 | 0.005746555 |
| DLGAP4    | 28.7150321  | 0.627192461  | 0.177879879 | 3.525932589  | 0.000421994 | 0.005815316 |
| SYNGR2    | 2935.447942 | -0.252495704 | 0.071610042 | -3.525981807 | 0.000421916 | 0.005815316 |
| TOP1MT    | 282.0805586 | -0.26364224  | 0.074776129 | -3.525754031 | 0.000422279 | 0.005815316 |
| PPAPDC1B  | 407.0990365 | 0.386085426  | 0.109550726 | 3.524261693  | 0.000424665 | 0.005843992 |
| AK8       | 137.1606661 | 0.311149661  | 0.088295211 | 3.523969852  | 0.000425133 | 0.005846256 |
| MANBA     | 1079.745061 | -0.25201845  | 0.071528551 | -3.523326637 | 0.000426166 | 0.005856284 |
| TFAP4     | 39.45082959 | -0.817319028 | 0.232038968 | -3.522335209 | 0.000427763 | 0.005874041 |
| C5orf20   | 20.63098219 | -1.144777608 | 0.325024213 | -3.522130233 | 0.000428094 | 0.005874398 |
| ZC3H12C   | 230.1178655 | 0.416854271  | 0.118457011 | 3.519034174  | 0.000433121 | 0.005939151 |

|           |             |              |             |              |             |             |
|-----------|-------------|--------------|-------------|--------------|-------------|-------------|
| IL36B     | 938.2701184 | 0.389178334  | 0.110605971 | 3.518601503  | 0.000433828 | 0.005940389 |
| PLCD1     | 137.3558387 | -0.383505508 | 0.108991375 | -3.518677582 | 0.000433703 | 0.005940389 |
| CD151     | 4408.941562 | -0.233520159 | 0.066380029 | -3.517927967 | 0.00043493  | 0.005951257 |
| VWA5A     | 964.8523123 | -0.273394968 | 0.077771409 | -3.515366038 | 0.000439148 | 0.006004706 |
| CCDC124   | 1444.942183 | -0.177563392 | 0.050529785 | -3.514034153 | 0.000441356 | 0.006030614 |
| PTGES2    | 198.8877188 | -0.29005179  | 0.082589556 | -3.511966951 | 0.000444803 | 0.006073409 |
| UBE2V1    | 51.68378813 | -0.422060733 | 0.120211084 | -3.510996807 | 0.00044643  | 0.0060913   |
| OSBPL8    | 2337.839784 | 0.20972593   | 0.059750998 | 3.509998759  | 0.000448109 | 0.006109882 |
| SVIL      | 1017.124667 | 0.349196886  | 0.099636076 | 3.504723377  | 0.000457082 | 0.006227822 |
| SLC9A1    | 800.7964461 | -0.29588591  | 0.084465471 | -3.503039849 | 0.000459981 | 0.006262888 |
| EEF2K     | 247.6674758 | -0.32555705  | 0.092961843 | -3.502050307 | 0.000461692 | 0.006281756 |
| TFRC      | 16849.4935  | 0.355268334  | 0.101452229 | 3.501828773  | 0.000462076 | 0.006282544 |
| EIF2AK4   | 436.961958  | -0.258584198 | 0.073854016 | -3.501288219 | 0.000463015 | 0.006290863 |
| GPX3      | 610.8584754 | -0.473446155 | 0.13528918  | -3.499512331 | 0.00046611  | 0.006328454 |
| CCDC23    | 147.3384587 | -0.375731744 | 0.107408695 | -3.498150176 | 0.000468497 | 0.006356386 |
| OMA1      | 152.6457922 | -0.313112204 | 0.089528251 | -3.49735642  | 0.000469894 | 0.006370844 |
| LFNG      | 468.4741739 | -0.33519451  | 0.095929392 | -3.49417943  | 0.000475521 | 0.006438084 |
| TOP1      | 1234.677283 | 0.290360044  | 0.083095776 | 3.494281611  | 0.000475339 | 0.006438084 |
| CNPY3     | 2229.348239 | -0.227618198 | 0.065199749 | -3.491090103 | 0.000481054 | 0.006508417 |
| CPVL      | 323.0382594 | -0.423739796 | 0.121428279 | -3.489630244 | 0.000483689 | 0.006539479 |
| MVD       | 98.20330081 | 0.358906353  | 0.102861152 | 3.489231302  | 0.000484412 | 0.006544655 |
| KIAA1598  | 1669.043727 | -0.245464644 | 0.070380673 | -3.48767119  | 0.000487247 | 0.006573872 |
| PCGF3     | 364.0054297 | 0.250093683  | 0.071708042 | 3.487665775  | 0.000487257 | 0.006573872 |
| MMP19     | 2255.759208 | 0.276474174  | 0.079291857 | 3.486791532  | 0.000488852 | 0.006590782 |
| TDO2      | 2.836733052 | 1.857951204  | 0.533024246 | 3.485678592  | 0.00049089  | 0.006613633 |
| SMARCA2   | 420.867824  | -0.242282452 | 0.069534555 | -3.484346056 | 0.000493341 | 0.006642006 |
| PRRC2C    | 1683.580076 | 0.295775797  | 0.084946756 | 3.481896318  | 0.000497876 | 0.006698385 |
| GPAM      | 61.83475248 | -0.372037446 | 0.106860423 | -3.481526971 | 0.000498564 | 0.006702949 |
| ZNF318    | 339.7478077 | 0.30110715   | 0.086491822 | 3.481336671  | 0.000498918 | 0.006703036 |
| CTSL2     | 77.57956769 | -0.463189956 | 0.133075386 | -3.480658382 | 0.000500183 | 0.006710673 |
| DUSP22    | 434.71406   | 0.265170168  | 0.076183331 | 3.480684871  | 0.000500134 | 0.006710673 |
| GPAT2     | 56.32152201 | -0.41098279  | 0.11811805  | -3.479424104 | 0.000502493 | 0.006736969 |
| TNFRSF10E | 1115.904928 | -0.231903532 | 0.066664068 | -3.478688557 | 0.000503874 | 0.006750788 |
| CMBL      | 10.58784065 | -1.614460888 | 0.46429539  | -3.477227907 | 0.000506627 | 0.006778361 |
| LOC28299  | 56.41797957 | -0.624061034 | 0.17947108  | -3.47722337  | 0.000506636 | 0.006778361 |
| SLIRP     | 1102.866829 | -0.233949906 | 0.067317197 | -3.475336389 | 0.000510213 | 0.006821489 |
| NCKAP5L   | 261.0596703 | -0.313409858 | 0.090186235 | -3.475140714 | 0.000510585 | 0.006821733 |
| SPTBN1    | 77.92832676 | -0.597480893 | 0.171977357 | -3.474183482 | 0.000512411 | 0.006841373 |
| CD109     | 865.3374144 | -0.296986931 | 0.08551107  | -3.473081706 | 0.000514519 | 0.006864763 |
| DKK2      | 4.123682356 | 1.829877243  | 0.527023116 | 3.472100535  | 0.000516403 | 0.006880372 |
| ENDOD1    | 139.9400518 | 0.504060059  | 0.145169252 | 3.472223303  | 0.000516167 | 0.006880372 |
| SP4       | 53.94086266 | 0.436081472  | 0.125673752 | 3.469948687  | 0.000520558 | 0.006930938 |
| DHX57     | 108.6313571 | -0.301682093 | 0.08695517  | -3.469397983 | 0.000521626 | 0.006935576 |
| DNAJC6    | 218.2452391 | 0.32344989   | 0.093228253 | 3.469440649  | 0.000521543 | 0.006935576 |
| TAPT1     | 264.6322865 | 0.326519668  | 0.094144908 | 3.468266903  | 0.000523827 | 0.006960032 |
| SLC30A5   | 389.2150041 | 0.498087567  | 0.143622329 | 3.468037106  | 0.000524275 | 0.006961185 |
| TBC1D10C  | 74.95493976 | 0.3921807    | 0.113113804 | 3.46713386   | 0.00052604  | 0.00697981  |

|           |             |              |             |              |             |             |
|-----------|-------------|--------------|-------------|--------------|-------------|-------------|
| SH3GLB2   | 631.331006  | -0.296093435 | 0.085431458 | -3.465859537 | 0.000528539 | 0.007008148 |
| KCNJ5     | 22.93738991 | -0.859560988 | 0.248081269 | -3.464836299 | 0.000530554 | 0.007030027 |
| ZNF823    | 54.29291309 | -0.375002913 | 0.108261732 | -3.463854735 | 0.000532494 | 0.007050879 |
| LITAF     | 1927.633128 | 0.342928779  | 0.09900827  | 3.463637718  | 0.000532924 | 0.007051723 |
| APOBEC3G  | 280.0709926 | 0.348639577  | 0.10069384  | 3.462372446  | 0.000535436 | 0.007080098 |
| ARID3B    | 171.5104505 | 0.363004446  | 0.104857233 | 3.461892267  | 0.000536392 | 0.007087877 |
| CPEB4     | 746.4111715 | 0.168180852  | 0.048584208 | 3.461636166  | 0.000536902 | 0.007089762 |
| RASGRP2   | 42.0430812  | -0.575841477 | 0.16645008  | -3.459544616 | 0.00054109  | 0.007140159 |
| RCN2      | 211.4709247 | -0.3064801   | 0.088594796 | -3.459346516 | 0.000541488 | 0.007140523 |
| ZC3HAV1   | 980.8201347 | 0.347756855  | 0.100537432 | 3.458978886  | 0.000542227 | 0.007145385 |
| GALK1     | 148.185795  | -0.297539483 | 0.086031608 | -3.458490312 | 0.000543212 | 0.007153465 |
| ASTE1     | 68.17337966 | -0.379506273 | 0.109801741 | -3.456286484 | 0.000547673 | 0.007202366 |
| TRIP11    | 351.8619859 | 0.203648994  | 0.058920502 | 3.456334985  | 0.000547574 | 0.007202366 |
| GRAMD1B   | 110.0649143 | -0.358714359 | 0.103861711 | -3.453768995 | 0.000552811 | 0.007260021 |
| PMAIP1    | 80.0099125  | 0.558114243  | 0.161588321 | 3.453926866  | 0.000552487 | 0.007260021 |
| FUT10     | 129.2711344 | -0.353441579 | 0.102348833 | -3.453303469 | 0.000553766 | 0.007267608 |
| RPLP2     | 19380.64828 | -0.194693878 | 0.056389101 | -3.452686329 | 0.000555034 | 0.007279295 |
| ZNF331    | 125.8190748 | -0.333601717 | 0.096655835 | -3.451438989 | 0.000557606 | 0.00730805  |
| DDX28     | 360.8926211 | -0.220161309 | 0.063795198 | -3.451063986 | 0.000558381 | 0.007313237 |
| LINC00656 | 75.60276598 | 0.489033105  | 0.141739676 | 3.450220278  | 0.000560129 | 0.007326172 |
| UBE2Z     | 2361.288724 | 0.159425055  | 0.046206175 | 3.45029761   | 0.000559969 | 0.007326172 |
| CCL15     | 1686.993546 | 0.523864574  | 0.151870208 | 3.449422905  | 0.000561786 | 0.007342857 |
| HNMT      | 1768.022906 | -0.196236701 | 0.056902619 | -3.448640942 | 0.000563415 | 0.007359159 |
| METTL7B   | 23.96773466 | 0.814008113  | 0.236136256 | 3.447196656  | 0.000566436 | 0.007393603 |
| CPNE9     | 4.788781711 | -1.290491857 | 0.374476278 | -3.446124449 | 0.000568688 | 0.007417976 |
| GOSR1     | 337.5562033 | 0.254728513  | 0.074004215 | 3.442081139  | 0.000577257 | 0.007524651 |
| AIDA      | 1077.427596 | 0.289564903  | 0.084139948 | 3.441467572  | 0.000578568 | 0.007531546 |
| MTHFD1    | 977.4288178 | 0.315986569  | 0.091813528 | 3.4416123    | 0.000578258 | 0.007531546 |
| FOLR3     | 93.62163537 | -0.801861495 | 0.233127418 | -3.439584675 | 0.000582608 | 0.007579012 |
| LOC10012! | 60.04809307 | 0.400029857  | 0.116323182 | 3.438952137  | 0.00058397  | 0.007591616 |
| INO80D    | 273.3521078 | 0.346378474  | 0.100777174 | 3.437072691  | 0.000588038 | 0.007639336 |
| DGKQ      | 164.3723033 | -0.289406322 | 0.084238876 | -3.435543495 | 0.000591367 | 0.007677404 |
| SNHG6     | 371.1513531 | -0.250661544 | 0.072970022 | -3.435130459 | 0.000592269 | 0.007683938 |
| SRSF5     | 3201.577779 | 0.211334448  | 0.06158121  | 3.431800822  | 0.000599588 | 0.007773659 |
| CCL8      | 35.43976865 | 2.032422444  | 0.592998748 | 3.4273638    | 0.000609472 | 0.007891187 |
| PPP3CC    | 337.691481  | 0.522323439  | 0.15239299  | 3.427476815  | 0.000609218 | 0.007891187 |
| NR1H3     | 2557.082657 | -0.280715673 | 0.081910685 | -3.427094685 | 0.000610076 | 0.007893707 |
| MPPE1     | 172.0515192 | -0.25004111  | 0.072973652 | -3.426457384 | 0.00061151  | 0.007906944 |
| PTGS1     | 192.5074858 | -0.430421366 | 0.12565619  | -3.425389267 | 0.000613919 | 0.007932774 |
| NIPAL4    | 5.117776535 | 2.00347632   | 0.585014648 | 3.424660095  | 0.000615569 | 0.007948762 |
| DPYD      | 509.1179153 | 0.240266344  | 0.07017556  | 3.423789467  | 0.000617544 | 0.007968929 |
| ZNF835    | 48.73882518 | -0.495142564 | 0.144731982 | -3.421099865 | 0.000623684 | 0.008042772 |
| PSME1     | 1166.326708 | 0.313520603  | 0.091651409 | 3.42079414   | 0.000624386 | 0.008046432 |
| HERC6     | 89.72414734 | 0.490813554  | 0.143527215 | 3.419654974  | 0.000627006 | 0.008074799 |
| TBC1D22B  | 315.3780297 | 0.226640438  | 0.066298377 | 3.418491524  | 0.000629693 | 0.008103982 |
| TMEM141   | 186.5726863 | -0.403279275 | 0.118003075 | -3.417531924 | 0.000631917 | 0.008127176 |
| MCM6      | 230.9919642 | -0.314893733 | 0.092151899 | -3.417116047 | 0.000632883 | 0.008134172 |

|           |             |              |             |              |             |             |
|-----------|-------------|--------------|-------------|--------------|-------------|-------------|
| GATSL2    | 16.54835072 | -0.696437076 | 0.203821724 | -3.416893271 | 0.000633401 | 0.008135403 |
| RBP7      | 31.54452711 | -0.565567306 | 0.165549908 | -3.416294894 | 0.000634795 | 0.00814787  |
| GMPPB     | 102.200575  | 0.508726579  | 0.148920434 | 3.416096542  | 0.000635257 | 0.008148379 |
| STK17A    | 582.531855  | 0.321071858  | 0.09401268  | 3.415197381  | 0.000637358 | 0.008169887 |
| TMSB4X    | 30661.40921 | -0.337167055 | 0.098877074 | -3.409961913 | 0.00064972  | 0.008322803 |
| CAT       | 1144.748218 | -0.370466962 | 0.108688888 | -3.408508159 | 0.000653191 | 0.008359797 |
| RPL7A     | 3019.423207 | -0.213887979 | 0.062753384 | -3.408389587 | 0.000653475 | 0.008359797 |
| TSTD1     | 55.46951193 | -0.47771581  | 0.140361413 | -3.403469652 | 0.000665358 | 0.008506163 |
| MIB2      | 43.37592828 | -0.373472706 | 0.109850298 | -3.399833349 | 0.000674269 | 0.008614372 |
| SDSL      | 334.5095205 | -0.403790623 | 0.118786996 | -3.399283049 | 0.000675628 | 0.008626004 |
| TIMM17A   | 784.3911011 | 0.198477037  | 0.058414654 | 3.397726801  | 0.000679482 | 0.008669475 |
| KIAA1430  | 340.3898444 | -0.198633092 | 0.05847721  | -3.396760776 | 0.000681886 | 0.008694379 |
| ALOX5AP   | 3927.796007 | 0.341268604  | 0.100534486 | 3.394542702  | 0.000687433 | 0.008755826 |
| SLC25A40  | 413.8316106 | 0.298064768  | 0.087808905 | 3.394470837  | 0.000687614 | 0.008755826 |
| PICALM    | 338.1257584 | 0.249566982  | 0.073542604 | 3.393502129  | 0.00069005  | 0.008781049 |
| GBP2      | 4049.654246 | 0.408855464  | 0.120512574 | 3.392637385  | 0.000692232 | 0.008802999 |
| PAG1      | 677.2987972 | 0.30684687   | 0.090525226 | 3.389628316  | 0.000699874 | 0.008894315 |
| SLC29A3   | 1566.924721 | -0.367703771 | 0.108502361 | -3.388901111 | 0.000701733 | 0.008912057 |
| KARS      | 386.2879539 | 0.228048721  | 0.067305421 | 3.388266738  | 0.000703358 | 0.008926812 |
| NCF1B     | 935.9486988 | -0.359490631 | 0.106116689 | -3.387691732 | 0.000704834 | 0.008939657 |
| BAZ2A     | 783.7540206 | 0.363208702  | 0.107245516 | 3.386702929  | 0.000707379 | 0.008964426 |
| FAM214B   | 299.2437112 | 0.274720751  | 0.081122642 | 3.386486739  | 0.000707937 | 0.008964426 |
| FOXO3     | 570.3510639 | -0.205933449 | 0.060812064 | -3.386391359 | 0.000708183 | 0.008964426 |
| ATP1B1    | 2585.646759 | 0.240228503  | 0.070977925 | 3.384552347  | 0.000712944 | 0.009018768 |
| PLCG1     | 51.23855036 | -0.434279631 | 0.128413975 | -3.381872041 | 0.000719937 | 0.009101247 |
| C15orf26  | 14.06582436 | 0.847646419  | 0.250758684 | 3.380327278  | 0.000723996 | 0.009146557 |
| TSPYL5    | 205.8432988 | 0.312203925  | 0.092365572 | 3.380089753  | 0.000724622 | 0.009148467 |
| CERS5     | 381.6686331 | 0.299141065  | 0.088532964 | 3.378866493  | 0.000727853 | 0.009183251 |
| TCEB1     | 2239.918162 | 0.175514365  | 0.051958642 | 3.377962913  | 0.000730249 | 0.009207449 |
| MAP4K1    | 58.57332637 | -0.486017512 | 0.14390222  | -3.377414971 | 0.000731706 | 0.009219779 |
| COLEC12   | 632.1226494 | -0.372355958 | 0.110257816 | -3.377138884 | 0.000732441 | 0.009223007 |
| ITIH5     | 389.3786523 | -0.239520061 | 0.070940526 | -3.376350239 | 0.000734543 | 0.009237412 |
| LOC388791 | 207.3709471 | 0.324289358  | 0.09604396  | 3.376468001  | 0.000734229 | 0.009237412 |
| RAPH1     | 308.0706747 | 0.407989325  | 0.120937409 | 3.373557692  | 0.000742035 | 0.009325535 |
| DLC1      | 235.7738689 | 0.375793369  | 0.111443553 | 3.372051221  | 0.000746106 | 0.009370582 |
| SIRPB1    | 133.9674745 | -0.453158441 | 0.134405346 | -3.37158048  | 0.000747382 | 0.009380496 |
| ATP8B2    | 24.55480825 | 0.802716181  | 0.238178032 | 3.370236016  | 0.000751038 | 0.00942025  |
| SYT11     | 190.870704  | -0.315074956 | 0.093530899 | -3.368672396 | 0.000755311 | 0.009467684 |
| NUDT14    | 223.7953166 | -0.270942422 | 0.08046539  | -3.367192044 | 0.000759378 | 0.009512467 |
| KLF7      | 85.35723609 | -0.480060498 | 0.142765212 | -3.362587373 | 0.000772157 | 0.009659983 |
| LMTK2     | 127.9881281 | 0.303603168  | 0.090284831 | 3.362726204  | 0.000771769 | 0.009659983 |
| ARRB1     | 666.8400843 | -0.349997136 | 0.10409196  | -3.362383951 | 0.000772726 | 0.00966083  |
| NELF      | 169.8687075 | -0.387647838 | 0.115351536 | -3.360578043 | 0.000777796 | 0.009717904 |
| ING4      | 106.3536678 | -0.291586838 | 0.086779238 | -3.360099097 | 0.000779145 | 0.009728458 |
| LY6G5B    | 85.02401385 | 0.277852     | 0.082756516 | 3.357463719  | 0.000786611 | 0.009815312 |
| NDUFB1    | 1044.366511 | -0.26868445  | 0.080044794 | -3.356676154 | 0.000788855 | 0.009830576 |
| SH3BP4    | 107.5655442 | -0.4249107   | 0.126584674 | -3.356731007 | 0.000788698 | 0.009830576 |

|           |             |              |             |              |             |             |
|-----------|-------------|--------------|-------------|--------------|-------------|-------------|
| ACE       | 256.3904411 | 0.500811159  | 0.149275336 | 3.354949123  | 0.000793796 | 0.009879374 |
| GMPPA     | 342.5621268 | 0.325773787  | 0.097099924 | 3.355036472  | 0.000793545 | 0.009879374 |
| MTMR1     | 509.3399227 | -0.297604944 | 0.088737541 | -3.353765942 | 0.000797198 | 0.009915307 |
| TLK2      | 1001.822829 | 0.200830561  | 0.059891328 | 3.353249446  | 0.000798687 | 0.009927421 |
| NHLRC3    | 219.7113343 | 0.377887988  | 0.112703833 | 3.352929349  | 0.000799611 | 0.009932501 |
| GHDC      | 130.87084   | -0.439806375 | 0.131256684 | -3.350735069 | 0.000805974 | 0.010005083 |
| SURF4     | 1223.262281 | 0.312439319  | 0.093287708 | 3.349201361  | 0.000810449 | 0.010054157 |
| TMEM39A   | 417.114373  | 0.393942738  | 0.117649238 | 3.348451259  | 0.000812646 | 0.010074925 |
| PBRM1     | 911.8577047 | 0.262525102  | 0.078410032 | 3.348106062  | 0.000813659 | 0.010080995 |
| HK3       | 1982.332241 | -0.252359463 | 0.075418681 | -3.346113438 | 0.000819529 | 0.010147197 |
| VNN1      | 200.3679754 | -0.339793417 | 0.101578007 | -3.345147519 | 0.000822388 | 0.010176063 |
| IDH2      | 285.4663492 | -0.287632957 | 0.086006864 | -3.344302335 | 0.000824898 | 0.010200567 |
| PLS3      | 55.82884928 | -0.435388968 | 0.130292233 | -3.341634108 | 0.000832868 | 0.010292514 |
| MALT1     | 91.77545239 | 0.308582165  | 0.092364425 | 3.34092012   | 0.000835012 | 0.010312404 |
| REV3L     | 102.0821751 | -0.294170049 | 0.088072811 | -3.340077906 | 0.000837549 | 0.010337103 |
| ANKRD13A  | 793.5771634 | 0.163992322  | 0.049131089 | 3.337852381  | 0.000844286 | 0.010409845 |
| NCOA2     | 237.3221536 | -0.325869399 | 0.097634874 | -3.337633231 | 0.000844952 | 0.010409845 |
| ZNF737    | 111.9609588 | -0.338455859 | 0.101407063 | -3.337596498 | 0.000845064 | 0.010409845 |
| PXMP2     | 30.46169359 | -0.480178323 | 0.143900135 | -3.336885841 | 0.000847227 | 0.010429829 |
| MEIS3P1   | 98.35149969 | -0.399550891 | 0.119771305 | -3.335948374 | 0.000850089 | 0.010458381 |
| DEXI      | 45.02637887 | -0.6092954   | 0.1826919   | -3.335098047 | 0.000852693 | 0.01048372  |
| GORAB     | 327.7692871 | 0.275441162  | 0.082604916 | 3.334440292  | 0.000854712 | 0.010501844 |
| YPEL4     | 166.6826819 | -0.352861416 | 0.105833623 | -3.334114496 | 0.000855714 | 0.010507451 |
| TOM1L2    | 272.1546792 | -0.264328836 | 0.079297364 | -3.333387411 | 0.000857954 | 0.010528242 |
| C21orf33  | 315.7585405 | -0.202225206 | 0.060701763 | -3.331455256 | 0.000863932 | 0.010594851 |
| ZNF133    | 5.775779581 | -1.104740383 | 0.331666444 | -3.330877765 | 0.000865726 | 0.010610101 |
| SLC39A12  | 4.974167761 | 1.310169241  | 0.393459674 | 3.329869174  | 0.000868868 | 0.010641838 |
| CHID1     | 376.1111665 | -0.228470155 | 0.068619017 | -3.32954572  | 0.000869878 | 0.010647437 |
| KSR1      | 12.90423274 | 0.893490389  | 0.268388341 | 3.329095385  | 0.000871286 | 0.010657897 |
| KANSL1-AS | 80.19380619 | -0.494621111 | 0.148841454 | -3.323140815 | 0.0008901   | 0.01088113  |
| GATM      | 10.61778985 | -0.629783318 | 0.189559639 | -3.322349224 | 0.000892629 | 0.01090513  |
| MGST3     | 7005.972264 | -0.30579806  | 0.092086911 | -3.320754902 | 0.000897743 | 0.010954416 |
| PLEKHG2   | 78.27076449 | 0.375559442  | 0.113095202 | 3.320737167  | 0.0008978   | 0.010954416 |
| CD3EAP    | 44.44467525 | -0.42916275  | 0.129305314 | -3.318987719 | 0.000903444 | 0.011016299 |
| DTNB      | 173.327269  | -0.291208171 | 0.087819859 | -3.315971737 | 0.000913251 | 0.011128834 |
| VEGFA     | 138.9032805 | -0.41399463  | 0.124937632 | -3.313610344 | 0.000920998 | 0.011216144 |
| ATHL1     | 26.08283135 | -0.511540058 | 0.154389434 | -3.313310014 | 0.000921987 | 0.011221103 |
| GAA       | 1152.060313 | -0.340105172 | 0.102691947 | -3.311897198 | 0.000926656 | 0.011270803 |
| SUMF2     | 669.5144392 | -0.214946142 | 0.064963769 | -3.30870802  | 0.000937275 | 0.011392773 |
| TLE2      | 17.72853996 | -0.933070244 | 0.282256388 | -3.305754214 | 0.000947211 | 0.011506289 |
| RNF26     | 342.259516  | -0.218492973 | 0.066132389 | -3.303872355 | 0.000953592 | 0.011576504 |
| CRABP2    | 161.7837415 | -0.453213249 | 0.137186609 | -3.303625995 | 0.000954431 | 0.011579384 |
| LY6G5C    | 42.03992991 | -0.436857574 | 0.132270977 | -3.30274701  | 0.000957427 | 0.011608429 |
| USP21     | 78.0403175  | -0.355375315 | 0.107663109 | -3.300808592 | 0.000964066 | 0.011681573 |
| LATS2     | 192.8107139 | 0.290875077  | 0.088191522 | 3.298220398  | 0.000972997 | 0.01178238  |
| TRAFD1    | 1140.832196 | 0.287380121  | 0.087136909 | 3.298029787  | 0.000973658 | 0.011782975 |
| PTP4A1    | 827.0716972 | 0.429534794  | 0.130247109 | 3.29784513   | 0.000974299 | 0.011783325 |

|           |             |              |             |              |             |             |
|-----------|-------------|--------------|-------------|--------------|-------------|-------------|
| DYRK1B    | 59.72912183 | -0.400362649 | 0.121426048 | -3.297172697 | 0.000976634 | 0.011804163 |
| ARHGAP35  | 402.4794967 | -0.25692239  | 0.077966837 | -3.295277854 | 0.000983244 | 0.011876602 |
| FAM213B   | 104.808607  | -0.513179003 | 0.155917516 | -3.291349284 | 0.00099708  | 0.012036183 |
| ARMC7     | 125.2883152 | -0.315527331 | 0.095880221 | -3.29084902  | 0.000998855 | 0.012050057 |
| APOA1     | 2.594212309 | 1.919922688  | 0.584047301 | 3.287272599  | 0.001011629 | 0.012196518 |
| ARF1      | 9575.302341 | 0.135347373  | 0.041189068 | 3.286002314  | 0.001016202 | 0.012243992 |
| SLC35E4   | 41.14026921 | -0.447090752 | 0.136077472 | -3.285560391 | 0.001017797 | 0.012255551 |
| CD46      | 35.14742484 | -0.618325163 | 0.188244598 | -3.284690074 | 0.001020946 | 0.012284754 |
| PCNA      | 309.7277278 | -0.217625365 | 0.06625753  | -3.284537861 | 0.001021498 | 0.012284754 |
| C10orf137 | 239.667041  | 0.253258594  | 0.077111216 | 3.28432888   | 0.001022256 | 0.012286198 |
| SOD2      | 83599.84538 | 0.211735144  | 0.064479228 | 3.28377292   | 0.001024274 | 0.012302784 |
| MEF2A     | 263.2359685 | 0.348171814  | 0.1060661   | 3.282592779  | 0.001028571 | 0.012346701 |
| ALDH4A1   | 27.99719955 | -0.468021954 | 0.142601414 | -3.282028849 | 0.001030631 | 0.012363717 |
| RC3H2     | 433.0410094 | 0.202211803  | 0.06163294  | 3.280904709  | 0.001034747 | 0.012405373 |
| LYZ       | 66510.70773 | -0.268415821 | 0.081850103 | -3.279358381 | 0.001040434 | 0.012465799 |
| NINJ2     | 79.3040586  | -0.485029515 | 0.147929712 | -3.278783598 | 0.001042556 | 0.012483452 |
| MBD2      | 4514.775245 | -0.178176243 | 0.054390578 | -3.275865972 | 0.001053385 | 0.012598615 |
| PRKACB    | 216.5091034 | -0.402621628 | 0.122906367 | -3.275840277 | 0.001053481 | 0.012598615 |
| CCDC109B  | 131.2508129 | 0.357604741  | 0.10920093  | 3.27474079   | 0.00105759  | 0.012639902 |
| EVL       | 4098.455129 | 0.274726801  | 0.083913047 | 3.273946192  | 0.001060568 | 0.01266764  |
| DPY30     | 616.1183923 | -0.226248189 | 0.06913888  | -3.272372781 | 0.001066489 | 0.012730464 |
| AKIRIN2   | 432.6968603 | 0.302689564  | 0.092548075 | 3.270619771  | 0.001073121 | 0.012801701 |
| SSH3      | 69.97032207 | -0.374778994 | 0.114684506 | -3.267913047 | 0.001083436 | 0.012916762 |
| CYB5D1    | 21.19121876 | 0.606577354  | 0.18567077  | 3.266951248  | 0.001087124 | 0.012952709 |
| MICALL2   | 81.42849829 | 0.361411579  | 0.110738801 | 3.263639979  | 0.001099908 | 0.013096931 |
| ABCB6     | 70.76193747 | -0.293652302 | 0.090038354 | -3.261413471 | 0.001108583 | 0.013192065 |
| ALAD      | 162.7117648 | -0.341535369 | 0.10479877  | -3.258963512 | 0.0011182   | 0.013298303 |
| IFNG      | 13.80402886 | 1.888333406  | 0.579547956 | 3.258286716  | 0.001120871 | 0.013321838 |
| TOR1A     | 1121.01333  | 0.360720828  | 0.110769628 | 3.256495801  | 0.001127966 | 0.013397899 |
| FAM156B   | 214.0581031 | 0.367671663  | 0.112914707 | 3.25618931   | 0.001129184 | 0.013404107 |
| TMEFF1    | 108.3284297 | 0.373629296  | 0.114753065 | 3.255941749  | 0.001130169 | 0.013407539 |
| HYOU1     | 1429.611939 | 0.279859213  | 0.08597344  | 3.255182225  | 0.001133196 | 0.013426913 |
| SEC24C    | 1090.999911 | 0.158375482  | 0.04865315  | 3.255194817  | 0.001133146 | 0.013426913 |
| NDUFB9    | 2105.55523  | -0.2533674   | 0.077848407 | -3.254625368 | 0.00113542  | 0.013431968 |
| PRDM1     | 290.9041478 | 0.297694764  | 0.091464455 | 3.254759055  | 0.001134886 | 0.013431968 |
| RPL11     | 18041.15814 | -0.230732869 | 0.070895437 | -3.254551784 | 0.001135715 | 0.013431968 |
| NAGLU     | 302.8619134 | -0.280412742 | 0.086185726 | -3.253586833 | 0.001139579 | 0.013469403 |
| RUFY1     | 1106.958166 | -0.197360931 | 0.060693702 | -3.251753039 | 0.001146956 | 0.01354829  |
| CCDC107   | 237.3940598 | -0.239772039 | 0.073750638 | -3.251118183 | 0.001149521 | 0.01357026  |
| FAM149B1  | 176.3018636 | -0.29065746  | 0.089425463 | -3.250276277 | 0.001152929 | 0.013602167 |
| CACNB3    | 116.3460823 | 0.315045811  | 0.096964534 | 3.249082904  | 0.001157777 | 0.013651002 |
| ST18      | 8.902132586 | -1.006744812 | 0.310083041 | -3.246694206 | 0.001167538 | 0.013757663 |
| S100A16   | 228.1807966 | 0.343324296  | 0.105751525 | 3.246518627  | 0.001168258 | 0.013757738 |
| LILRB5    | 47.11978674 | -0.924636153 | 0.28494448  | -3.244969518 | 0.001174632 | 0.013824349 |
| MAGEH1    | 56.46385402 | -0.441862104 | 0.136213409 | -3.243895778 | 0.001179069 | 0.013868095 |
| CASD1     | 71.84358654 | -0.485764622 | 0.149843038 | -3.241823105 | 0.001187677 | 0.013960823 |
| TUG1      | 585.5882175 | 0.198037392  | 0.061130997 | 3.239557708  | 0.001197152 | 0.014063621 |

|           |             |              |             |              |             |             |
|-----------|-------------|--------------|-------------|--------------|-------------|-------------|
| CHP1      | 1621.784412 | -0.210120781 | 0.064876844 | -3.2387639   | 0.001200489 | 0.014094224 |
| CLDN16    | 4.980159806 | 1.840994779  | 0.568618142 | 3.237664514  | 0.001205124 | 0.014131422 |
| NACC2     | 229.2884012 | -0.364973654 | 0.112725673 | -3.237715466 | 0.001204909 | 0.014131422 |
| TNNI2     | 88.9421797  | -0.437968236 | 0.135289152 | -3.237275335 | 0.001206769 | 0.014133505 |
| WDR43     | 230.6948551 | -0.24305171  | 0.075077251 | -3.237354948 | 0.001206433 | 0.014133505 |
| RNF19B    | 1213.736568 | 0.495355764  | 0.153061269 | 3.236323382  | 0.001210801 | 0.014172113 |
| LIG4      | 135.4371755 | 0.255022272  | 0.078822408 | 3.235403207  | 0.001214711 | 0.014209238 |
| LOC100501 | 38.20366442 | -0.56402779  | 0.174349419 | -3.235042562 | 0.001216246 | 0.014210994 |
| TULP4     | 235.5148666 | -0.329931779 | 0.101987509 | -3.235021438 | 0.001216336 | 0.014210994 |
| DGCR6L    | 205.8928824 | -0.315769103 | 0.097671355 | -3.232975557 | 0.00122508  | 0.014295821 |
| SERINC3   | 1704.42886  | -0.153961345 | 0.047621705 | -3.233007824 | 0.001224942 | 0.014295821 |
| PARP4     | 1454.651202 | -0.217217325 | 0.067245926 | -3.230193057 | 0.001237067 | 0.014426952 |
| FAM160A2  | 119.9867137 | 0.308581545  | 0.095543797 | 3.229739176  | 0.001239032 | 0.014441131 |
| AKNA      | 100.3559541 | -0.381348172 | 0.11810606  | -3.228862036 | 0.001242838 | 0.014476738 |
| PSKH1     | 136.7629123 | -0.287513692 | 0.089092977 | -3.227119609 | 0.001250432 | 0.014556386 |
| GUSBP4    | 18.34382452 | -0.57464919  | 0.178170345 | -3.225279666 | 0.001258497 | 0.014641423 |
| IFT172    | 59.78941314 | -0.442184689 | 0.137128461 | -3.224601849 | 0.00126148  | 0.014666142 |
| MMAA      | 187.0383035 | 0.318465436  | 0.098765781 | 3.224451153  | 0.001262144 | 0.014666142 |
| GGT8P     | 15.18871256 | -0.696362148 | 0.216043506 | -3.223249613 | 0.001267451 | 0.014718928 |
| DLG5      | 65.72778097 | -0.450260888 | 0.139715487 | -3.222698489 | 0.001269891 | 0.014738391 |
| CSTF3     | 179.0411711 | 0.289306267  | 0.089801618 | 3.221615296  | 0.001274702 | 0.014785311 |
| CD38      | 174.320835  | 0.773899488  | 0.24028138  | 3.22080508   | 0.001278311 | 0.01481825  |
| EIF4A1    | 20017.80098 | 0.133388327  | 0.041430603 | 3.219560333  | 0.001283873 | 0.014867417 |
| RGL1      | 70.20257877 | 0.399786898  | 0.124182933 | 3.219338504  | 0.001284867 | 0.014867417 |
| ZNF586    | 299.5243504 | 0.278609947  | 0.086541844 | 3.219366888  | 0.00128474  | 0.014867417 |
| WFS1      | 174.5271927 | 0.52965216   | 0.164569602 | 3.21840821   | 0.001289042 | 0.014906775 |
| HFE       | 183.7481037 | -0.353684813 | 0.109985498 | -3.215740429 | 0.001301085 | 0.01503701  |
| ATP6VOE2  | 19.98522684 | -0.615048355 | 0.191278831 | -3.215454378 | 0.001302382 | 0.01504298  |
| PLEKHO1   | 323.0316708 | 0.271348307  | 0.084423168 | 3.214145033  | 0.001308336 | 0.015102694 |
| ACOT2     | 446.8990816 | -0.350137284 | 0.109017221 | -3.211761221 | 0.00131924  | 0.015219445 |
| DGKG      | 12.40660522 | -0.793101354 | 0.247116671 | -3.209420684 | 0.001330027 | 0.015334714 |
| SMG1      | 596.6541596 | 0.230991923  | 0.071990242 | 3.208656013  | 0.001333569 | 0.015366356 |
| KCNC4     | 30.32816104 | -0.526401695 | 0.164084524 | -3.208112996 | 0.00133609  | 0.015379816 |
| TMEM9     | 149.0763655 | -0.400839214 | 0.124947525 | -3.208060445 | 0.001336334 | 0.015379816 |
| JAK2      | 306.9884825 | 0.434955078  | 0.135596935 | 3.20770582   | 0.001337983 | 0.015389598 |
| RPL18A    | 4249.833393 | -0.186310399 | 0.058132186 | -3.204943984 | 0.001350888 | 0.01552876  |
| NOB1      | 237.6752075 | -0.265709456 | 0.082931347 | -3.203968891 | 0.001355471 | 0.015572158 |
| MARVELD1  | 530.3430836 | -0.383837984 | 0.119808671 | -3.203757961 | 0.001356465 | 0.015574283 |
| CCND2     | 83.25178231 | 0.474891603  | 0.148277722 | 3.202717156  | 0.001361376 | 0.015618307 |
| NADKD1    | 239.2378474 | -0.276965145 | 0.086481286 | -3.202602068 | 0.00136192  | 0.015618307 |
| TBCA      | 1043.939967 | 0.182804642  | 0.057085004 | 3.202323381  | 0.001363239 | 0.015624126 |
| TTLL1     | 36.34828072 | -0.416639717 | 0.130119103 | -3.201987312 | 0.00136483  | 0.015633066 |
| SIGLEC15  | 14.96988585 | 0.891085935  | 0.278360422 | 3.201194792  | 0.00136859  | 0.015666816 |
| SNORA70C  | 511.2399656 | 0.346816081  | 0.108403333 | 3.199311969  | 0.00137756  | 0.015760139 |
| PER2      | 109.6199375 | 0.313913994  | 0.098209482 | 3.196371549  | 0.001391678 | 0.015912204 |
| COMMD3    | 494.0887721 | -0.18356112  | 0.05744477  | -3.195436621 | 0.001396194 | 0.015954379 |
| ASB13     | 62.96571697 | -0.520482349 | 0.162906151 | -3.194982796 | 0.001398392 | 0.015970015 |

|           |             |              |             |              |             |             |
|-----------|-------------|--------------|-------------|--------------|-------------|-------------|
| SMURF2    | 138.2471918 | -0.308757088 | 0.09665755  | -3.194340109 | 0.001401509 | 0.015996133 |
| SRSF8     | 243.1366415 | -0.210117522 | 0.065794207 | -3.193556593 | 0.001405318 | 0.016030109 |
| LOC10013: | 22.45715299 | 0.584220447  | 0.183004972 | 3.192374728  | 0.001411081 | 0.016086328 |
| GRIPAP1   | 371.1988856 | 0.265096985  | 0.083091739 | 3.190413236  | 0.001420695 | 0.016186344 |
| TACC3     | 115.5348003 | -0.393973991 | 0.123500733 | -3.190053878 | 0.001422463 | 0.01618734  |
| ZNF143    | 126.2782203 | 0.44661627   | 0.139997252 | 3.190178842  | 0.001421848 | 0.01618734  |
| NAAA      | 208.676425  | -0.349937435 | 0.109704074 | -3.189830817 | 0.001423561 | 0.016190276 |
| TIFAB     | 30.04981761 | -0.842803001 | 0.264411335 | -3.187469256 | 0.001435237 | 0.016313439 |
| SLC45A3   | 41.48750569 | -0.546690213 | 0.171544291 | -3.186874997 | 0.001438189 | 0.016337354 |
| KLF3      | 937.2793325 | -0.244370059 | 0.076687308 | -3.186577594 | 0.001439669 | 0.016344523 |
| ARNTL2    | 314.9004911 | 0.590413528  | 0.185308762 | 3.186106916  | 0.001442013 | 0.016361497 |
| USO1      | 490.2996564 | 0.253850319  | 0.079694144 | 3.185307036  | 0.001446005 | 0.016397135 |
| ST6GAL1   | 62.71476142 | -0.578250285 | 0.181604002 | -3.184127444 | 0.001451911 | 0.016454419 |
| DBP       | 22.81268378 | -0.713042552 | 0.223960729 | -3.183783851 | 0.001453635 | 0.016464277 |
| RARA      | 217.7554428 | 0.4421948    | 0.138897285 | 3.183610116  | 0.001454508 | 0.016464481 |
| RTN2      | 64.55183837 | 0.39351432   | 0.12363885  | 3.182772401  | 0.001458722 | 0.016502492 |
| FAM195A   | 188.6762274 | -0.342223969 | 0.107549656 | -3.182008954 | 0.001462573 | 0.016531694 |
| PPP1R10   | 748.6211947 | 0.292322115  | 0.09186971  | 3.181920502  | 0.00146302  | 0.016531694 |
| TBC1D19   | 20.93394275 | 0.561502434  | 0.176482304 | 3.1816359    | 0.001464458 | 0.016538246 |
| PPM1K     | 198.8411627 | 0.30714495   | 0.096582161 | 3.18014163   | 0.001472031 | 0.016614029 |
| LOC72843: | 127.2093727 | 0.374297706  | 0.117782596 | 3.17786937   | 0.001483616 | 0.016734978 |
| SLC11A1   | 3293.287406 | 0.3742808    | 0.11781578  | 3.176830804  | 0.001488939 | 0.016785192 |
| SCP2      | 925.0726234 | -0.240682977 | 0.075814727 | -3.174620399 | 0.001500326 | 0.016903677 |
| ASPSCR1   | 288.6968706 | -0.244005642 | 0.076913726 | -3.172458984 | 0.001511539 | 0.017000182 |
| HNRNPF    | 296.7881797 | 0.310284843  | 0.097801678 | 3.172592226  | 0.001510846 | 0.017000182 |
| RPL13     | 1065.163719 | -0.302833586 | 0.095449805 | -3.172699881 | 0.001510286 | 0.017000182 |
| CCDC125   | 268.7442445 | -0.270974087 | 0.085424695 | -3.172081409 | 0.001513506 | 0.01701237  |
| WAPAL     | 603.2359367 | 0.211613532  | 0.066813628 | 3.167221078  | 0.001539033 | 0.017289215 |
| CLIP2     | 7.87181572  | -1.082522877 | 0.341939657 | -3.165830152 | 0.001546411 | 0.017361974 |
| TCHP      | 267.0096355 | -0.217421723 | 0.068692872 | -3.165127868 | 0.001550148 | 0.017393799 |
| NEFH      | 39.24505824 | -0.549167909 | 0.173558265 | -3.164170304 | 0.001555258 | 0.017440974 |
| HPS1      | 840.8705153 | -0.245688212 | 0.077712755 | -3.161491466 | 0.001569634 | 0.017591956 |
| CYLD      | 1055.888499 | 0.236395853  | 0.074890899 | 3.156536459  | 0.001596549 | 0.017883208 |
| STAT4     | 10.4601501  | 0.967646333  | 0.306797676 | 3.154021067  | 0.001610375 | 0.018027587 |
| ELF4      | 904.4796918 | 0.176240441  | 0.05589096  | 3.153290672  | 0.00161441  | 0.018055805 |
| GLI3      | 29.15971942 | 0.53754156   | 0.170475797 | 3.153184019  | 0.001615    | 0.018055805 |
| MAPK10    | 2.885995317 | 1.730922367  | 0.548966539 | 3.153056232  | 0.001615707 | 0.018055805 |
| HOMER2    | 42.21452115 | -0.494743921 | 0.156925448 | -3.15273225  | 0.001617501 | 0.018065376 |
| CDK19     | 333.054131  | -0.254434521 | 0.080726339 | -3.151815449 | 0.001622588 | 0.018111691 |
| LOC10013: | 85.41463729 | -0.390235288 | 0.12382055  | -3.15161973  | 0.001623676 | 0.01811334  |
| C1RL      | 813.8832309 | 0.357790969  | 0.113534988 | 3.151371891  | 0.001625054 | 0.018118227 |
| CBWD2     | 265.3102563 | 0.205586706  | 0.065255307 | 3.150497878  | 0.001629924 | 0.018162015 |
| ARC       | 79.96075244 | 0.494350024  | 0.156998973 | 3.148746863  | 0.001639722 | 0.018260623 |
| ARID5A    | 50.29851951 | 0.356637193  | 0.113304142 | 3.14760948   | 0.001646115 | 0.018321226 |
| CASZ1     | 34.21729753 | 0.403494381  | 0.12819947  | 3.147395077  | 0.001647322 | 0.018324081 |
| ACSL4     | 2578.839449 | 0.230397534  | 0.073254329 | 3.145172961  | 0.001659887 | 0.018453189 |
| CASP9     | 696.067015  | 0.173220452  | 0.055079897 | 3.144894236  | 0.001661469 | 0.018460126 |

|          |             |              |             |              |             |             |
|----------|-------------|--------------|-------------|--------------|-------------|-------------|
| CYP1B1   | 3094.613444 | 0.276024053  | 0.087802779 | 3.143682433  | 0.001668364 | 0.018526051 |
| POC1B    | 185.9692895 | 0.270514664  | 0.08607423  | 3.142806678  | 0.001673363 | 0.018570861 |
| MICALL1  | 909.3412014 | 0.276251022  | 0.087925391 | 3.141879943  | 0.001678669 | 0.018619014 |
| ERI1     | 289.0977873 | 0.281886736  | 0.089736666 | 3.141265964  | 0.001682192 | 0.018647359 |
| SLC12A6  | 737.172949  | 0.291564912  | 0.092885047 | 3.138986532  | 0.001695332 | 0.018782216 |
| FGD5     | 957.6930055 | -0.310174839 | 0.098935869 | -3.135110062 | 0.001717896 | 0.019010335 |
| NPC2     | 5657.418389 | -0.183180226 | 0.058428457 | -3.135120036 | 0.001717838 | 0.019010335 |
| ACSF3    | 154.9589982 | -0.291259166 | 0.092937803 | -3.133914916 | 0.001724909 | 0.019076975 |
| USP13    | 292.1195935 | -0.261196048 | 0.083372148 | -3.132893356 | 0.001730923 | 0.019132511 |
| VPS26B   | 241.7132774 | -0.21397636  | 0.068310394 | -3.132412905 | 0.001733759 | 0.019152863 |
| C8B      | 86.36068617 | -0.398331303 | 0.127250563 | -3.130291085 | 0.001746332 | 0.019280702 |
| SURF1    | 118.6806704 | -0.255300313 | 0.081565915 | -3.129987727 | 0.001748136 | 0.01928957  |
| HLA-E    | 14075.23027 | 0.34242147   | 0.109409149 | 3.129733424  | 0.00174965  | 0.019295225 |
| REXO1    | 429.2692347 | 0.240097866  | 0.076760544 | 3.127881238  | 0.001760713 | 0.019383942 |
| SENP2    | 259.1421168 | 0.243803476  | 0.077938385 | 3.128156635  | 0.001759064 | 0.019383942 |
| ZC3H12D  | 22.59830356 | -0.574147429 | 0.183556836 | -3.127900017 | 0.001760601 | 0.019383942 |
| CTSZ     | 11575.13261 | 0.204804418  | 0.065484854 | 3.127508181  | 0.001762949 | 0.019386403 |
| NEFM     | 354.2001701 | 0.352688588  | 0.112765497 | 3.127628566  | 0.001762227 | 0.019386403 |
| GAPT     | 16.60652006 | -0.75174621  | 0.240401694 | -3.127042058 | 0.001765747 | 0.019395026 |
| VAV2     | 191.8750927 | -0.251800971 | 0.0805203   | -3.127173775 | 0.001764956 | 0.019395026 |
| MZT2B    | 173.4203979 | -0.316542815 | 0.101233918 | -3.126845431 | 0.001766928 | 0.019396943 |
| ERMAP    | 60.83959832 | -0.330834908 | 0.105825611 | -3.12622724  | 0.001770647 | 0.019426697 |
| SLC12A2  | 59.91094051 | -0.414120289 | 0.132488265 | -3.125712968 | 0.001773746 | 0.019449623 |
| AREG     | 41.39128596 | 0.538542322  | 0.172358428 | 3.12454882   | 0.00178078  | 0.019504869 |
| RPS18    | 1006.955326 | -0.245671086 | 0.078626221 | -3.124543987 | 0.001780809 | 0.019504869 |
| C19orf66 | 271.9238901 | 0.22879923   | 0.073291902 | 3.121753218  | 0.001797776 | 0.019679515 |
| CHRNA1   | 6.552004839 | -1.306290166 | 0.418559691 | -3.120917267 | 0.001802887 | 0.019713063 |
| PALD1    | 3.89626829  | -1.401945696 | 0.449197049 | -3.121003797 | 0.001802357 | 0.019713063 |
| TWIST1   | 2.987145649 | 1.985831269  | 0.636418047 | 3.120325197  | 0.001806515 | 0.019741528 |
| NUDT4    | 352.2872495 | 0.223390656  | 0.071602725 | 3.119862507  | 0.001809355 | 0.019755147 |
| SMARCD3  | 3.023573151 | -1.747069228 | 0.559996118 | -3.119788107 | 0.001809812 | 0.019755147 |
| METRNL   | 824.8604462 | 0.27179439   | 0.087133122 | 3.119300504  | 0.00181281  | 0.019776666 |
| PIK3CG   | 924.6306855 | 0.428391549  | 0.137380384 | 3.118287615  | 0.001819052 | 0.019833534 |
| ATP8A1   | 27.86099335 | -0.5805083   | 0.186193159 | -3.117774591 | 0.001822221 | 0.019856851 |
| TMEM66   | 5602.111485 | -0.206370415 | 0.06623955  | -3.115516553 | 0.00183623  | 0.0199982   |
| EFTUD1   | 575.6755289 | 0.171433714  | 0.055048505 | 3.114230149  | 0.001844256 | 0.020074254 |
| FAM108A1 | 817.5217994 | -0.202374113 | 0.064995875 | -3.113645489 | 0.001847914 | 0.02009137  |
| ZNF804A  | 108.7010672 | 0.286631796  | 0.092055587 | 3.113681692  | 0.001847687 | 0.02009137  |
| TBXAS1   | 755.0997653 | -0.222429271 | 0.071445656 | -3.11326514  | 0.001850297 | 0.020105936 |
| APP      | 662.0191151 | 0.177421328  | 0.056996245 | 3.112859966  | 0.001852839 | 0.020122209 |
| CCL13    | 14.43430413 | 1.123010082  | 0.36101608  | 3.110692691  | 0.001866491 | 0.020259048 |
| PIP4K2C  | 592.6329649 | 0.16216814   | 0.052148009 | 3.109766679  | 0.001872352 | 0.020311222 |
| SAPCD1   | 10.91140983 | -0.973576343 | 0.313123329 | -3.109242439 | 0.001875677 | 0.020335847 |
| FPR3     | 3399.805888 | -0.293257078 | 0.094323886 | -3.109043628 | 0.00187694  | 0.020338091 |
| EYA4     | 9.4070752   | 0.85752965   | 0.275856278 | 3.108610238  | 0.001879695 | 0.02035474  |
| LONRF1   | 196.5560622 | 0.370904878  | 0.119320732 | 3.108469671  | 0.001880589 | 0.02035474  |
| KCNJ10   | 3.087738338 | -1.582593214 | 0.509191649 | -3.108050213 | 0.001883261 | 0.020372207 |

|           |             |              |             |              |             |             |
|-----------|-------------|--------------|-------------|--------------|-------------|-------------|
| TBKBP1    | 163.2272454 | 0.329264637  | 0.106003973 | 3.106153741  | 0.001895381 | 0.020491817 |
| PLBD1     | 2609.671952 | -0.280497096 | 0.090311571 | -3.105882137 | 0.001897123 | 0.020499145 |
| AKIRIN1   | 1273.588759 | 0.219747283  | 0.070758779 | 3.105583317  | 0.001899041 | 0.020508367 |
| GNL1      | 426.551696  | 0.25162295   | 0.081039215 | 3.10495296   | 0.001903093 | 0.020540609 |
| PLEKHG6   | 11.5703773  | -0.776802442 | 0.250230905 | -3.104342533 | 0.001907024 | 0.020571515 |
| LAMC2     | 17.77500962 | 0.87069708   | 0.280557516 | 3.103453057  | 0.001912766 | 0.020621906 |
| DCSTAMP   | 5038.136037 | 0.275073136  | 0.088649723 | 3.102921556  | 0.001916204 | 0.020647422 |
| HUWE1     | 1015.117063 | 0.259140314  | 0.083552102 | 3.101541513  | 0.001925159 | 0.020732313 |
| PLEKHB1   | 29.2898176  | -0.58675975  | 0.189290186 | -3.099789599 | 0.001936582 | 0.020843676 |
| GPR161    | 20.08741693 | 0.69311412   | 0.22363151  | 3.099358049  | 0.001939405 | 0.020861047 |
| MINK1     | 1395.250409 | -0.315023518 | 0.101646327 | -3.099212026 | 0.001940361 | 0.020861047 |
| RPS6KA4   | 332.7935289 | -0.270438795 | 0.087289091 | -3.098196954 | 0.00194702  | 0.020910396 |
| SOAT1     | 11085.38648 | 0.208439399  | 0.067277983 | 3.098181427  | 0.001947122 | 0.020910396 |
| AP2M1     | 6673.188112 | -0.210550684 | 0.068039435 | -3.094538972 | 0.00197119  | 0.021157077 |
| PXMP4     | 73.94162772 | -0.311438706 | 0.100750563 | -3.091185769 | 0.001993589 | 0.021373667 |
| RASAL2    | 812.0722322 | 0.197513414  | 0.06389427  | 3.091253932  | 0.001993131 | 0.021373667 |
| LY75      | 479.848243  | -0.368503716 | 0.119241267 | -3.090404235 | 0.001998843 | 0.021418075 |
| PTPMT1    | 1109.534726 | 0.174908088  | 0.056612184 | 3.089583853  | 0.002004371 | 0.021465378 |
| ACSS3     | 20.03584532 | -0.646951388 | 0.209410085 | -3.089399386 | 0.002005616 | 0.021466779 |
| SPATA7    | 38.53022866 | -0.435841251 | 0.141100407 | -3.088873088 | 0.002009172 | 0.021492902 |
| C4orf34   | 506.9944257 | -0.166578085 | 0.053940577 | -3.088177689 | 0.00201388  | 0.021531307 |
| CLMP      | 5.009332083 | -1.417419408 | 0.459083437 | -3.087498465 | 0.002018488 | 0.021568604 |
| FLJ42393  | 44.34049112 | 0.641062967  | 0.207753948 | 3.085683677  | 0.002030847 | 0.02168864  |
| APEH      | 471.5746994 | -0.216431551 | 0.070160731 | -3.084796133 | 0.002036917 | 0.021729373 |
| CISD2     | 823.1955259 | -0.275632625 | 0.089347385 | -3.084954586 | 0.002035832 | 0.021729373 |
| RPL36A    | 1377.450449 | -0.254509254 | 0.082536904 | -3.083581307 | 0.002045252 | 0.021806213 |
| GTF2E2    | 185.0046943 | 0.244258599  | 0.079243716 | 3.082371859  | 0.002053581 | 0.021858727 |
| HTATIP2   | 423.2305573 | -0.262211596 | 0.085066619 | -3.082426447 | 0.002053205 | 0.021858727 |
| IL19      | 3.365531194 | 2.488887688  | 0.807415456 | 3.082536592  | 0.002052445 | 0.021858727 |
| ARHGAP22  | 74.89018538 | -0.378539335 | 0.122831662 | -3.081773282 | 0.002057715 | 0.021890633 |
| HELB      | 67.96721974 | 0.398368163  | 0.129274297 | 3.081572852  | 0.002059101 | 0.021893287 |
| EGFL8     | 9.340713984 | -0.946325126 | 0.307226613 | -3.080218594 | 0.002068487 | 0.021968839 |
| PAK1      | 422.0328051 | -0.229960795 | 0.074656366 | -3.080257006 | 0.00206822  | 0.021968839 |
| MAML3     | 11.02062994 | -1.074723416 | 0.349084026 | -3.078695488 | 0.002079091 | 0.022069291 |
| GRAMD3    | 25.4833716  | 0.47158948   | 0.153229125 | 3.077675202  | 0.002086222 | 0.02213279  |
| SLC16A10  | 168.2797115 | -0.297180964 | 0.096578713 | -3.077085565 | 0.002090353 | 0.022164413 |
| TBC1D9B   | 1416.638201 | -0.148631924 | 0.048326512 | -3.075577319 | 0.002100954 | 0.02226457  |
| EIF2S1    | 456.76123   | 0.195609352  | 0.063626118 | 3.074356215  | 0.002109574 | 0.022322474 |
| LOC100500 | 151.151749  | -0.43415409  | 0.141214966 | -3.074419826 | 0.002109124 | 0.022322474 |
| ZCCHC10   | 237.5351343 | 0.193087416  | 0.062806731 | 3.074310884  | 0.002109894 | 0.022322474 |
| CASP6     | 182.4324393 | -0.236900073 | 0.077099172 | -3.072666886 | 0.002121552 | 0.022421182 |
| SLC47A1   | 569.1100576 | -0.272721233 | 0.088754642 | -3.072754596 | 0.002120928 | 0.022421182 |
| LOC645511 | 45.62358063 | -0.38965677  | 0.126860338 | -3.071541331 | 0.002129567 | 0.022493549 |
| COX5B     | 1612.494609 | -0.225077358 | 0.07329213  | -3.07096216  | 0.002133702 | 0.022524877 |
| MME       | 42.87388687 | -0.302242402 | 0.098450951 | -3.069979524 | 0.002140734 | 0.022586742 |
| CCL23     | 1004.895712 | -0.445969314 | 0.145310333 | -3.069081919 | 0.002147177 | 0.022642317 |
| THBS1     | 765.8219943 | -0.393853967 | 0.128347047 | -3.068664039 | 0.002150182 | 0.022661606 |

|          |             |              |             |              |             |             |
|----------|-------------|--------------|-------------|--------------|-------------|-------------|
| ZNF629   | 47.12864361 | -0.425035639 | 0.138540506 | -3.067952125 | 0.002155311 | 0.022703242 |
| VAC14    | 3085.377442 | 0.178225669  | 0.058127846 | 3.066097966  | 0.002168722 | 0.022832026 |
| GPAA1    | 800.5195624 | -0.225564779 | 0.073574974 | -3.065781295 | 0.002171021 | 0.022843737 |
| PYCARD   | 519.2212747 | -0.27419807  | 0.089467291 | -3.064785636 | 0.002178261 | 0.022907407 |
| C18orf8  | 315.9922495 | 0.325404033  | 0.106216741 | 3.06358519   | 0.002187019 | 0.022986968 |
| TBX20    | 64.06222741 | 0.455143121  | 0.148587572 | 3.063130473  | 0.002190345 | 0.023009375 |
| NR1H4    | 2.854739323 | 2.651393149  | 0.866047853 | 3.061485735  | 0.002202415 | 0.023123556 |
| CLDND1   | 761.5473505 | 0.420927695  | 0.137508777 | 3.061096936  | 0.002205277 | 0.023140993 |
| DGKE     | 23.56356499 | 0.534843911  | 0.17488472  | 3.058265524  | 0.002226222 | 0.023322674 |
| GSPT2    | 59.20275904 | -0.317225125 | 0.103718808 | -3.058511088 | 0.002224398 | 0.023322674 |
| TUBB2A   | 698.0383134 | -0.178293439 | 0.058295871 | -3.058423104 | 0.002225052 | 0.023322674 |
| GSG2     | 62.19313463 | -0.519505028 | 0.169924381 | -3.057271855 | 0.002233616 | 0.023387416 |
| TMC1     | 3.955715668 | 1.513909575  | 0.49539983  | 3.055934791  | 0.0022436   | 0.023479199 |
| LILRB4   | 3873.173105 | -0.238580116 | 0.078125533 | -3.053804635 | 0.002259592 | 0.023633711 |
| DOCK8    | 1714.751316 | 0.17779245   | 0.058245543 | 3.052464449  | 0.002269706 | 0.023726619 |
| ANP32A   | 855.6965923 | -0.187398561 | 0.061409607 | -3.051616346 | 0.002276128 | 0.023780849 |
| FBL      | 366.539739  | -0.260521414 | 0.085388693 | -3.051005998 | 0.00228076  | 0.023816328 |
| FNDC3B   | 6113.521759 | 0.218286438  | 0.07155426  | 3.050642098  | 0.002283526 | 0.023832292 |
| NPLOC4   | 1347.650338 | 0.23605242   | 0.077409338 | 3.049404961  | 0.002292952 | 0.023917708 |
| ABHD14B  | 296.130847  | -0.289165156 | 0.094932244 | -3.046016241 | 0.002318953 | 0.024175839 |
| NLK      | 433.9387372 | 0.273529533  | 0.089842355 | 3.044549893  | 0.002330288 | 0.024280867 |
| CHI3L2   | 31.00963403 | 0.625963817  | 0.205621599 | 3.044251288  | 0.002332602 | 0.024291845 |
| GAS7     | 304.3498875 | -0.288545425 | 0.094841423 | -3.042398718 | 0.002347008 | 0.024415471 |
| POU2F2   | 10.72724171 | 0.90152687   | 0.296306242 | 3.042551057  | 0.00234582  | 0.024415471 |
| TPD52L1  | 5.858716072 | -1.532187984 | 0.503978958 | -3.040182449 | 0.002364349 | 0.024582592 |
| NCKAP5   | 2.981786799 | 2.063969621  | 0.679470994 | 3.037612552  | 0.002384603 | 0.024768924 |
| REXO2    | 163.7604825 | -0.250178653 | 0.082361106 | -3.037582472 | 0.002384841 | 0.024768924 |
| INTS6    | 234.8225466 | 0.471896304  | 0.155367049 | 3.037299779  | 0.002387079 | 0.024778809 |
| PPIL1    | 50.15808595 | 0.524063986  | 0.172555129 | 3.037081477  | 0.002388809 | 0.024783409 |
| TFEB     | 282.528706  | -0.301232907 | 0.099260336 | -3.034776203 | 0.002407142 | 0.024960174 |
| NDUFA2   | 592.6237171 | -0.217209739 | 0.071579048 | -3.034543569 | 0.002409    | 0.024965996 |
| RAD51AP1 | 40.93108865 | -0.429914444 | 0.141723298 | -3.033477562 | 0.002417527 | 0.025040899 |
| SLC25A45 | 74.01542934 | -0.330256678 | 0.108892578 | -3.032866745 | 0.002422425 | 0.025078156 |
| IER5     | 2197.947276 | 0.266030832  | 0.087721292 | 3.032682547  | 0.002423904 | 0.025079991 |
| CLN6     | 939.8599853 | -0.259057227 | 0.085428378 | -3.032449325 | 0.002425778 | 0.025085906 |
| PCCB     | 169.8231304 | -0.265964735 | 0.087716143 | -3.032107045 | 0.002428531 | 0.025100897 |
| GPR64    | 203.940869  | 0.299689331  | 0.09885124  | 3.03172051   | 0.002431642 | 0.025107347 |
| MRPL55   | 128.7693463 | -0.259760299 | 0.085681236 | -3.031705776 | 0.002431761 | 0.025107347 |
| CDC42SE1 | 2021.83736  | 0.213173467  | 0.070356169 | 3.029918606  | 0.002446197 | 0.025242861 |
| CHST15   | 100.9556961 | 0.450088102  | 0.148558026 | 3.02971245   | 0.002447867 | 0.025246574 |
| PRPF4B   | 953.0307048 | 0.145690862  | 0.048100006 | 3.028915694  | 0.002454332 | 0.025299707 |
| SH3PXD2B | 432.7799164 | 0.403485067  | 0.133230732 | 3.028468442  | 0.002457967 | 0.025323637 |
| TPRG1L   | 587.7414409 | -0.149834579 | 0.049479809 | -3.028196393 | 0.002460181 | 0.0253329   |
| PPP6R3   | 729.0337582 | 0.168180275  | 0.055542893 | 3.027935101  | 0.00246231  | 0.02534127  |
| LYL1     | 156.4526506 | -0.26312586  | 0.086926296 | -3.026999569 | 0.002469943 | 0.025406259 |
| PI4K2B   | 121.5057643 | 0.387661954  | 0.128140346 | 3.025291923  | 0.002483933 | 0.025533107 |
| VGLL3    | 55.98785717 | 0.958211253  | 0.316746141 | 3.025171041  | 0.002484926 | 0.025533107 |

|          |             |              |             |              |             |             |
|----------|-------------|--------------|-------------|--------------|-------------|-------------|
| SMAGP    | 6.221301757 | 1.453709167  | 0.48072206  | 3.024011771  | 0.002494467 | 0.025617488 |
| CREBZF   | 230.6289806 | -0.25043929  | 0.082846228 | -3.022941369 | 0.002503307 | 0.025694576 |
| EPDR1    | 143.3476503 | -0.331861407 | 0.10988037  | -3.020206508 | 0.002526024 | 0.025913939 |
| TTLL11   | 33.83236967 | -0.500681167 | 0.165949153 | -3.017075753 | 0.002552226 | 0.026169157 |
| ICMT     | 486.4869484 | -0.217932939 | 0.072271625 | -3.015470302 | 0.002565811 | 0.026256975 |
| KIAA2013 | 992.8889922 | -0.187772971 | 0.062262565 | -3.015824556 | 0.002562815 | 0.026256975 |
| PSMB8    | 465.4085519 | 0.466176314  | 0.154597718 | 3.015415237  | 0.002566277 | 0.026256975 |
| SSX1     | 636.2912718 | -0.222305038 | 0.073714999 | -3.015736847 | 0.002563556 | 0.026256975 |
| CCL7     | 113.0336391 | 0.608202768  | 0.201747755 | 3.01466932   | 0.002572596 | 0.026307659 |
| EBPL     | 43.93377328 | -0.647243263 | 0.214796691 | -3.013283209 | 0.002584376 | 0.026386111 |
| KIAA0922 | 306.3018266 | -0.275953539 | 0.091575298 | -3.013405856 | 0.002583332 | 0.026386111 |
| NRAS     | 1176.159717 | 0.225621482  | 0.074870968 | 3.013470888  | 0.002582778 | 0.026386111 |
| CHD6     | 69.49935227 | -0.431457228 | 0.143281949 | -3.011246223 | 0.002601778 | 0.02654971  |
| DAPK2    | 4.412871538 | -1.299592182 | 0.43167213  | -3.010600155 | 0.002607319 | 0.026592174 |
| SLC35E2B | 198.7950651 | -0.245696674 | 0.081622264 | -3.010167346 | 0.002611038 | 0.026616008 |
| ZNF438   | 275.6023062 | 0.216236851  | 0.071867791 | 3.008814501  | 0.002622692 | 0.026720668 |
| DSTN     | 1896.015343 | -0.139507171 | 0.046393707 | -3.007027882 | 0.002638156 | 0.02686401  |
| SLX4     | 103.1478028 | 0.343653333  | 0.114375703 | 3.004600831  | 0.002659296 | 0.027064974 |
| C21orf7  | 55.06604539 | 0.46852731   | 0.155990412 | 3.003564789  | 0.002668367 | 0.027142959 |
| JHDM1D   | 249.2179829 | 0.269305505  | 0.08971102  | 3.001922214  | 0.002682807 | 0.027275442 |
| C6orf48  | 340.0468033 | -0.228935206 | 0.076278253 | -3.001316852 | 0.002688147 | 0.027315316 |
| DDR1     | 23.75111146 | 0.621247263  | 0.207062406 | 3.000289985  | 0.002697227 | 0.027393132 |
| MGC12916 | 115.9252924 | 0.648168494  | 0.216074607 | 2.999743948  | 0.002702067 | 0.027427826 |
| KBTBD3   | 30.44907088 | -0.517117453 | 0.172417677 | -2.999213666 | 0.002706774 | 0.027455211 |
| RNF7     | 1051.53765  | -0.196505976 | 0.065521231 | -2.999119095 | 0.002707614 | 0.027455211 |
| NDUFB2   | 581.2045666 | -0.204204222 | 0.068100108 | -2.998588829 | 0.002712331 | 0.027488566 |
| DDB2     | 159.1206336 | -0.24221602  | 0.080788514 | -2.998149201 | 0.002716247 | 0.027513779 |
| DBF4     | 194.0563568 | 0.319497297  | 0.106693385 | 2.994537073  | 0.002748617 | 0.027827034 |
| IDI1     | 328.4468166 | 0.325992758  | 0.108888771 | 2.993814281  | 0.002755136 | 0.027878387 |
| TNIK     | 1091.698781 | -0.202297107 | 0.06757951  | -2.993468073 | 0.002758264 | 0.027895385 |
| DDX59    | 250.4106587 | 0.22061921   | 0.073716707 | 2.992797962  | 0.002764327 | 0.027942036 |
| CCDC50   | 856.8138044 | 0.270212702  | 0.090300001 | 2.99238869   | 0.002768036 | 0.027964855 |
| SPG7     | 314.2680601 | -0.229646137 | 0.076779186 | -2.990994686 | 0.002780703 | 0.028078108 |
| MS4A6A   | 57.26983782 | -0.392295372 | 0.131203583 | -2.989974534 | 0.002790007 | 0.028157295 |
| KBTBD7   | 75.0471175  | -0.374450292 | 0.125254525 | -2.989515076 | 0.002794207 | 0.028184913 |
| C7orf50  | 446.5505107 | -0.332284485 | 0.11116983  | -2.988980784 | 0.002799097 | 0.028204712 |
| PHTF2    | 362.0818703 | 0.333775322  | 0.111665212 | 2.989071661  | 0.002798265 | 0.028204712 |
| SLC22A5  | 138.3639163 | -0.2668003   | 0.089283478 | -2.988238205 | 0.002805908 | 0.028258556 |
| PAQR4    | 30.28971149 | -0.482695304 | 0.161554161 | -2.987823409 | 0.002809718 | 0.028282151 |
| DIS3L    | 237.3739267 | -0.405334529 | 0.135692167 | -2.987162334 | 0.002815802 | 0.028313796 |
| NR1D1    | 81.077635   | 0.336301997  | 0.112578688 | 2.987261662  | 0.002814887 | 0.028313796 |
| PCYT1A   | 839.2314562 | 0.212182462  | 0.071056261 | 2.986119154  | 0.002825425 | 0.028395745 |
| ABCA6    | 27.85413398 | 0.710724281  | 0.238134989 | 2.984543704  | 0.002840016 | 0.028527504 |
| GLB1     | 1150.104089 | -0.23266316  | 0.077969999 | -2.984008771 | 0.002844986 | 0.028562534 |
| RARRES3  | 305.3214643 | 0.643544169  | 0.215826132 | 2.981771315  | 0.00286586  | 0.028757112 |
| RPL29    | 5028.573228 | -0.189969767 | 0.063762228 | -2.979346439 | 0.00288864  | 0.028970606 |
| KCNAB2   | 2013.026761 | -0.317497002 | 0.106572563 | -2.979162675 | 0.002890373 | 0.028972905 |

|           |             |              |             |              |             |             |
|-----------|-------------|--------------|-------------|--------------|-------------|-------------|
| RIN3      | 1239.696864 | -0.249159244 | 0.083643508 | -2.97882346  | 0.002893574 | 0.028989914 |
| MAPK3     | 158.8252194 | -0.31603667  | 0.106153785 | -2.977158742 | 0.002909333 | 0.029132648 |
| PPP1R15A  | 3099.007601 | 0.300114559  | 0.100860776 | 2.975532923  | 0.0029248   | 0.029272305 |
| ARHGAP18  | 1218.786813 | 0.17043297   | 0.057288526 | 2.974993121  | 0.002929951 | 0.029308639 |
| CNKSR3    | 10.32313137 | 1.083687015  | 0.364581418 | 2.972414287  | 0.002954677 | 0.029540636 |
| RIT1      | 1125.417444 | 0.169128128  | 0.05693393  | 2.97060344   | 0.002972153 | 0.029699947 |
| C2CD2     | 127.194172  | -0.278054601 | 0.093692287 | -2.967742709 | 0.002999953 | 0.029962209 |
| TMEM107   | 145.5870817 | -0.24655759  | 0.08309534  | -2.967165047 | 0.003005596 | 0.030003009 |
| CLSTN1    | 477.2471168 | -0.21101185  | 0.07115121  | -2.96568182  | 0.003020128 | 0.030116863 |
| CMTM8     | 6.714459169 | -1.212738475 | 0.408910853 | -2.965777177 | 0.003019191 | 0.030116863 |
| TMEM199   | 369.5900243 | 0.158218169  | 0.053362153 | 2.964988475  | 0.003026943 | 0.030169207 |
| SZRD1     | 3201.704917 | 0.189326204  | 0.063865842 | 2.964436048  | 0.003032383 | 0.030207799 |
| LOC73010: | 25.90885715 | -0.51840984  | 0.174906678 | -2.963922508 | 0.003037448 | 0.030242618 |
| AKR1A1    | 1685.565885 | -0.19935958  | 0.067286527 | -2.962845428 | 0.003048096 | 0.030332963 |
| FOXRED2   | 14.04042813 | -0.821883275 | 0.277587844 | -2.960804275 | 0.003068369 | 0.030503194 |
| TALDO1    | 20205.19952 | -0.21723262  | 0.07336839  | -2.960847595 | 0.003067937 | 0.030503194 |
| PHLDB1    | 29.6254062  | 0.481664854  | 0.162699695 | 2.960453341  | 0.003071866 | 0.030522217 |
| CSRNP2    | 49.65997717 | 0.419952191  | 0.14193317  | 2.958802308  | 0.003088372 | 0.030670395 |
| LOC64563: | 211.5083755 | 0.280029241  | 0.094684081 | 2.957511333  | 0.003101333 | 0.030783251 |
| SLC9A7    | 905.2620286 | -0.201684339 | 0.068250969 | -2.955039926 | 0.003126286 | 0.031014945 |
| FN3K      | 27.45962077 | -0.55254136  | 0.187026043 | -2.95435518  | 0.003133232 | 0.031067855 |
| RARRES1   | 91.4570736  | -0.428790458 | 0.145192157 | -2.953261853 | 0.003144351 | 0.031162073 |
| TMEM14E   | 157.7994188 | 0.319930331  | 0.108398675 | 2.951422907  | 0.003163135 | 0.031332112 |
| AGAP3     | 1949.253637 | -0.245751079 | 0.083302372 | -2.950109012 | 0.003176618 | 0.0314495   |
| TRPC6     | 29.25365688 | -0.530848753 | 0.179982178 | -2.949451774 | 0.003183383 | 0.031500281 |
| LOC10013: | 25.29966385 | -0.530049133 | 0.179742212 | -2.948940751 | 0.003188651 | 0.031536217 |
| TRIM14    | 1643.110055 | 0.278331175  | 0.094398981 | 2.948455276  | 0.003193663 | 0.031569585 |
| SERTAD2   | 288.0650211 | 0.309449053  | 0.104960421 | 2.948245151  | 0.003195835 | 0.031574852 |
| ACOT11    | 43.46463614 | 0.420492971  | 0.142652605 | 2.94767117   | 0.003201774 | 0.031617317 |
| EIF4EBP2  | 2543.831924 | -0.220700568 | 0.074892632 | -2.946892943 | 0.003209843 | 0.03168045  |
| EIF5      | 1500.413639 | 0.22920018   | 0.077780995 | 2.946737559  | 0.003211456 | 0.03168045  |
| UNC119    | 239.3630384 | -0.191105387 | 0.06488071  | -2.945488545 | 0.003224451 | 0.03179236  |
| CD300E    | 162.0316724 | 0.446366653  | 0.15159852  | 2.944399801  | 0.003235817 | 0.031888108 |
| HDAC9     | 18.53517548 | 0.623880585  | 0.212011011 | 2.942680101  | 0.003253845 | 0.032049371 |
| DUSP14    | 104.0662058 | -0.312446716 | 0.106206075 | -2.941891178 | 0.003262145 | 0.032114713 |
| BDH2      | 51.15241256 | -0.409141638 | 0.139084826 | -2.94166984  | 0.003264478 | 0.03212126  |
| DNAJC9    | 128.7003022 | -0.279523866 | 0.095059836 | -2.940504401 | 0.003276783 | 0.032225886 |
| RBM47     | 4356.007935 | 0.235630406  | 0.080144669 | 2.940063395  | 0.003281451 | 0.032255324 |
| UPB1      | 4.335791028 | 1.631296637  | 0.554885753 | 2.939878395  | 0.003283411 | 0.03225813  |
| SSH2      | 1083.614817 | -0.240612205 | 0.08185339  | -2.939550877 | 0.003286883 | 0.032275784 |
| TMEM206   | 624.2095061 | 0.216687088  | 0.073747628 | 2.938224494  | 0.003300979 | 0.032397688 |
| SH3BGR1   | 3024.015281 | -0.266282266 | 0.090659236 | -2.937177484 | 0.003312145 | 0.032490724 |
| ZADH2     | 71.15916437 | -0.381513258 | 0.129928394 | -2.936334756 | 0.003321157 | 0.032562551 |
| AOAH      | 8.251252446 | -0.876620361 | 0.298730367 | -2.934486939 | 0.003340996 | 0.032740403 |
| RPS12     | 5842.00042  | -0.171716992 | 0.058522834 | -2.934187924 | 0.003344217 | 0.032755301 |
| RTP4      | 150.7413594 | 0.469877869  | 0.160241818 | 2.932304913  | 0.003364562 | 0.032937834 |
| SMARCA1   | 6.210520644 | 1.063182406  | 0.362691492 | 2.931368476  | 0.003374722 | 0.033020518 |

|          |             |              |             |              |             |             |
|----------|-------------|--------------|-------------|--------------|-------------|-------------|
| FTL      | 156066.0227 | -0.241311735 | 0.082339719 | -2.930684452 | 0.003382161 | 0.033076508 |
| ANGPTL4  | 14.52407821 | 0.93203588   | 0.318120279 | 2.929822276  | 0.003391559 | 0.033151588 |
| DDA1     | 1459.399735 | 0.155959909  | 0.053241766 | 2.92927753   | 0.003397509 | 0.033192907 |
| CREBRF   | 1000.274103 | -0.244516594 | 0.083570583 | -2.925869208 | 0.003434953 | 0.033541717 |
| TTC33    | 173.8714764 | 0.208799971  | 0.071417967 | 2.923633624  | 0.003459717 | 0.033766417 |
| ZMYND8   | 148.2075102 | 0.228595998  | 0.078199542 | 2.923239601  | 0.003464098 | 0.033792061 |
| ANXA9    | 7.164247718 | -1.157427766 | 0.396021686 | -2.922637341 | 0.003470805 | 0.03384035  |
| GUCY1B2  | 9.054118041 | -0.908812457 | 0.310993117 | -2.922291227 | 0.003474665 | 0.033843727 |
| VPS37B   | 673.8082618 | 0.243301954  | 0.083252861 | 2.922445568  | 0.003472943 | 0.033843727 |
| ATG4A    | 181.406607  | 0.276614557  | 0.094717412 | 2.920419269  | 0.003495608 | 0.033996788 |
| EAPP     | 249.6403025 | -0.266689121 | 0.091309571 | -2.920713754 | 0.003492305 | 0.033996788 |
| FES      | 66.73670627 | -0.399549556 | 0.136812669 | -2.920413423 | 0.003495673 | 0.033996788 |
| IL18BP   | 137.3543223 | 0.547199822  | 0.187403829 | 2.919896695  | 0.003501474 | 0.034018863 |
| MPST     | 134.5803486 | -0.31891621  | 0.10921606  | -2.920048677 | 0.003499767 | 0.034018863 |
| ANKRD33E | 4.223258813 | 1.481672966  | 0.507563108 | 2.919189638  | 0.003509427 | 0.034078938 |
| TOP2A    | 7.420910679 | -1.052891775 | 0.361071828 | -2.91601752  | 0.003545306 | 0.034410007 |
| GLIPR1   | 571.5422627 | -0.434112039 | 0.148947185 | -2.914536712 | 0.003562169 | 0.034556269 |
| GAL      | 41.75257963 | -0.491447698 | 0.168649362 | -2.9140205   | 0.003568065 | 0.034596042 |
| MMP2     | 45.64819958 | -0.419212099 | 0.143869695 | -2.913831846 | 0.003570222 | 0.034599542 |
| FAM78A   | 549.4762746 | -0.297334532 | 0.102066295 | -2.913151029 | 0.003578015 | 0.034657636 |
| ATP8B1   | 28.79335888 | -0.705277759 | 0.242144829 | -2.912627792 | 0.003584015 | 0.03469831  |
| CDIPT    | 813.1228902 | -0.23298521  | 0.080010105 | -2.91194732  | 0.003591832 | 0.034756523 |
| CCND3    | 908.933466  | 0.264446093  | 0.090878315 | 2.909892133  | 0.003615535 | 0.034944251 |
| SHMT1    | 24.24400592 | -0.584384456 | 0.200840457 | -2.90969492  | 0.003617817 | 0.034944251 |
| TCEAL1   | 16.2355268  | -0.475169206 | 0.163295802 | -2.909867861 | 0.003615816 | 0.034944251 |
| ZNF93    | 50.71306362 | -0.315587211 | 0.108462743 | -2.909637003 | 0.003618488 | 0.034944251 |
| ABL2     | 1740.059641 | 0.395204237  | 0.135880083 | 2.908478034  | 0.003631927 | 0.03503891  |
| SLTM     | 1069.330872 | 0.175335689  | 0.060283281 | 2.908529279  | 0.003631332 | 0.03503891  |
| FOXO1    | 130.118046  | -0.237831298 | 0.081779403 | -2.908205357 | 0.003635095 | 0.035051926 |
| FUK      | 99.40496509 | -0.306340232 | 0.105366901 | -2.907366831 | 0.003644855 | 0.035128452 |
| DNAJC7   | 1062.478172 | 0.196781413  | 0.067710226 | 2.906228865  | 0.003658138 | 0.035238841 |
| PYURF    | 695.0097168 | -0.145520979 | 0.050083566 | -2.905563476 | 0.003665925 | 0.035296206 |
| BAHCC1   | 14.25703261 | -0.627863564 | 0.216195055 | -2.904153215 | 0.003682479 | 0.035437882 |
| PDGFA    | 31.03201191 | 0.495860874  | 0.170770945 | 2.903660647  | 0.003688277 | 0.035475958 |
| MAT2A    | 1813.792215 | 0.20862858   | 0.071860033 | 2.90326309   | 0.003692963 | 0.035503302 |
| LRP5L    | 16.62040062 | -0.592473817 | 0.20413841  | -2.902314254 | 0.003704168 | 0.035575519 |
| VEGFB    | 582.4634727 | -0.292851614 | 0.100899362 | -2.902412941 | 0.003703001 | 0.035575519 |
| GNB5     | 40.79374393 | -0.569090224 | 0.196114558 | -2.901825487 | 0.003709951 | 0.035613316 |
| ARFIP2   | 176.259028  | 0.232997411  | 0.080310775 | 2.901197395  | 0.003717396 | 0.035660038 |
| PORCN    | 74.50477862 | -0.296250881 | 0.102122138 | -2.900946705 | 0.003720371 | 0.035660038 |
| RAB31    | 4494.181159 | 0.256780737  | 0.088514685 | 2.900995882  | 0.003719788 | 0.035660038 |
| AOC2     | 65.80138508 | 0.398465597  | 0.137465772 | 2.898653187  | 0.003747692 | 0.035899913 |
| HSP90B1  | 11063.09856 | 0.194251269  | 0.067017089 | 2.898533374  | 0.003749124 | 0.035899913 |
| MSANTD3  | 844.9108578 | 0.274873083  | 0.09488729  | 2.896837738  | 0.003769447 | 0.036076582 |
| FCGR2B   | 5.831613147 | 1.457611814  | 0.503265035 | 2.896310519  | 0.003775786 | 0.036109814 |
| USP7     | 1241.731081 | 0.140018488  | 0.048344965 | 2.896237257  | 0.003776667 | 0.036109814 |
| SUCO     | 259.6422967 | 0.248582322  | 0.085900929 | 2.893825765  | 0.003805793 | 0.03637024  |

|           |             |              |             |              |             |             |
|-----------|-------------|--------------|-------------|--------------|-------------|-------------|
| RPS6      | 4068.761649 | -0.164134751 | 0.056724324 | -2.893551463 | 0.003809119 | 0.036383976 |
| S1PR4     | 98.4008006  | -0.328664514 | 0.113601208 | -2.893142782 | 0.003814079 | 0.0364133   |
| FUBP1     | 759.2835703 | 0.234338273  | 0.081012112 | 2.892632565  | 0.003820279 | 0.036454433 |
| C6orf1    | 427.1660222 | -0.245945647 | 0.085036072 | -2.892250807 | 0.003824925 | 0.036480693 |
| FAM109B   | 82.06722236 | -0.315369317 | 0.109144245 | -2.889472713 | 0.003858885 | 0.036786382 |
| MICALCL   | 37.61067952 | 0.642241201  | 0.222641489 | 2.884642951  | 0.003918578 | 0.037336956 |
| MAP3K6    | 47.9235477  | -0.423407014 | 0.146876086 | -2.88274985  | 0.003942204 | 0.037514392 |
| PVRL2     | 404.5227705 | 0.298702424  | 0.103619927 | 2.882673552  | 0.003943159 | 0.037514392 |
| SNX20     | 146.2686531 | -0.298047682 | 0.103391768 | -2.882702261 | 0.003942799 | 0.037514392 |
| UBE2Q1    | 568.5382866 | 0.157703317  | 0.054710085 | 2.882527341  | 0.003944989 | 0.037514392 |
| ZBTB7A    | 1091.953245 | 0.217830643  | 0.075610343 | 2.880963547  | 0.003964615 | 0.037682423 |
| SNX9      | 108.6155686 | 0.277242716  | 0.096251432 | 2.880400961  | 0.003971697 | 0.037731123 |
| ANAPC15   | 144.7649533 | -0.329817388 | 0.114565946 | -2.878843146 | 0.003991368 | 0.037898591 |
| SNRPG     | 189.5637206 | 0.204086126  | 0.070895394 | 2.878693706  | 0.00399326  | 0.037898591 |
| AIFM2     | 89.80846513 | 0.317698657  | 0.110404602 | 2.877585286  | 0.004007316 | 0.038013267 |
| FAM190B   | 550.8987502 | 0.201007595  | 0.0698674   | 2.876986911  | 0.004014922 | 0.038066681 |
| ABHD6     | 462.9903045 | -0.225286455 | 0.078328661 | -2.876168844 | 0.004025343 | 0.038146711 |
| SS18      | 744.6535977 | 0.267887921  | 0.093205287 | 2.874170879  | 0.004050897 | 0.038370003 |
| APOE      | 29349.31247 | -0.244075853 | 0.084925412 | -2.874002565 | 0.004053057 | 0.038371593 |
| IQCC      | 11.43856742 | -0.712721749 | 0.24826634  | -2.870794924 | 0.004094411 | 0.038744064 |
| NUDCD1    | 132.4652644 | 0.24221985   | 0.084394308 | 2.870096997  | 0.004103459 | 0.038810624 |
| UHRF1BP1  | 405.7884458 | 0.205437348  | 0.07159513  | 2.869431875  | 0.004112099 | 0.038873258 |
| CPNE2     | 390.9179583 | -0.241252558 | 0.084111162 | -2.86825852  | 0.004127381 | 0.038960377 |
| TLR5      | 34.69423839 | -0.679570011 | 0.23690842  | -2.868492429 | 0.004124331 | 0.038960377 |
| YIPF6     | 594.5703486 | 0.220447824  | 0.076856234 | 2.868314166  | 0.004126655 | 0.038960377 |
| LOC10028: | 316.1616998 | -0.182409435 | 0.063603216 | -2.867927849 | 0.004131697 | 0.038982019 |
| REEP6     | 8.294948073 | -0.965448541 | 0.336678888 | -2.867564835 | 0.00413644  | 0.039007666 |
| CUL1      | 845.3402552 | 0.190227132  | 0.066362442 | 2.866487819  | 0.004150541 | 0.039121492 |
| NOXA1     | 12.40484156 | -0.704269309 | 0.245766298 | -2.865605724 | 0.004162123 | 0.03921147  |
| CCDC88C   | 15.56367945 | -0.661851303 | 0.230987848 | -2.865307882 | 0.00416604  | 0.03921169  |
| LSM6      | 161.6608534 | -0.296778668 | 0.103577023 | -2.865294443 | 0.004166217 | 0.03921169  |
| SAFB      | 720.5416976 | 0.106598876  | 0.037205813 | 2.865113491  | 0.004168598 | 0.039214947 |
| MLLT11    | 11.95601532 | 0.614738584  | 0.214821073 | 2.861630733  | 0.004214676 | 0.039629066 |
| NUDT7     | 7.999292517 | -0.784928477 | 0.274385014 | -2.860682752 | 0.004227298 | 0.039728356 |
| MAZ       | 2349.280647 | -0.231344003 | 0.080884424 | -2.860179889 | 0.004234008 | 0.039733264 |
| MED11     | 138.6185754 | -0.305995423 | 0.106981988 | -2.860251779 | 0.004233048 | 0.039733264 |
| ST3GAL2   | 866.5874216 | 0.302264139  | 0.105670084 | 2.860451397  | 0.004230384 | 0.039733264 |
| FBXL4     | 127.7875281 | -0.274000147 | 0.095854318 | -2.858506032 | 0.00425641  | 0.03992405  |
| PSIP1     | 48.40553329 | -0.381156798 | 0.133384805 | -2.857572855 | 0.004268946 | 0.04002215  |
| CDKL1     | 65.70073792 | 0.302190916  | 0.105812075 | 2.855920899  | 0.00429122  | 0.040211406 |
| ZC3H3     | 132.9343898 | 0.315093194  | 0.110347425 | 2.855464852  | 0.004297388 | 0.040249624 |
| CDK17     | 418.3786155 | 0.243612603  | 0.085336721 | 2.854721862  | 0.004307453 | 0.04030471  |
| CYBASC3   | 590.8537679 | -0.266058691 | 0.093195067 | -2.854858077 | 0.004305606 | 0.04030471  |
| ANKRD6    | 44.16818574 | -0.309886516 | 0.108562573 | -2.854450735 | 0.004311132 | 0.040319546 |
| C17orf100 | 21.39964062 | -0.68632583  | 0.240462683 | -2.854188527 | 0.004314692 | 0.040333262 |
| FAM127C   | 61.2288777  | -0.368538653 | 0.129156687 | -2.853422932 | 0.004325102 | 0.040410965 |
| HK2       | 3088.559117 | 0.135500192  | 0.047520634 | 2.851396968  | 0.004352759 | 0.040649663 |

|          |             |              |             |              |             |             |
|----------|-------------|--------------|-------------|--------------|-------------|-------------|
| OR6N2    | 24.30796551 | -0.775253335 | 0.271950908 | -2.850710595 | 0.004362165 | 0.04071777  |
| UBE2M    | 1124.162068 | 0.228755851  | 0.080253196 | 2.850426693  | 0.004366061 | 0.040734401 |
| EZH2     | 140.8992504 | 0.494513846  | 0.173542582 | 2.849524533  | 0.004378463 | 0.0408234   |
| HSP90AA1 | 13222.76596 | 0.220138438  | 0.077257155 | 2.849424611  | 0.004379838 | 0.0408234   |
| ST5      | 15.42628931 | -0.642566574 | 0.225525185 | -2.849200964 | 0.004382919 | 0.040832355 |
| COMMD9   | 417.4400664 | -0.252435936 | 0.088609229 | -2.848867322 | 0.004387517 | 0.040855442 |
| PNPLA7   | 6.070827235 | -1.017950935 | 0.357531378 | -2.847165304 | 0.004411045 | 0.041054683 |
| IFFO1    | 244.6129658 | -0.263515102 | 0.092580761 | -2.846326803 | 0.004422678 | 0.041143078 |
| STAP2    | 51.99119473 | -0.489878288 | 0.172119521 | -2.846151823 | 0.004425109 | 0.041145827 |
| PTGER3   | 48.87887079 | 0.556949043  | 0.195768248 | 2.844940624  | 0.00444197  | 0.041282681 |
| EIF2C1   | 200.3097459 | -0.288196628 | 0.101316513 | -2.844517827 | 0.00444787  | 0.041317578 |
| RPS11    | 12986.6518  | -0.191945308 | 0.067525053 | -2.842579139 | 0.004475012 | 0.041549677 |
| UBE2N    | 1091.712731 | 0.203590064  | 0.071655851 | 2.841220383  | 0.004494124 | 0.041707033 |
| SEC61G   | 2076.383301 | 0.203203705  | 0.071535249 | 2.840609462  | 0.004502742 | 0.041766886 |
| PDGFRL   | 3.304313232 | 2.036556126  | 0.717184915 | 2.839652764  | 0.004516266 | 0.04187218  |
| CSF2RA   | 1846.807072 | 0.183395064  | 0.064595554 | 2.839128266  | 0.004523697 | 0.041920897 |
| EIF2C3   | 393.2681021 | 0.22291403   | 0.078519592 | 2.838960621  | 0.004526074 | 0.041922762 |
| UBE3C    | 346.0712414 | 0.276807937  | 0.097546212 | 2.837710768  | 0.004543834 | 0.042067034 |
| MFGE8    | 234.5326966 | -0.352682981 | 0.12431204  | -2.837078216 | 0.004552846 | 0.042130224 |
| PON2     | 34.29357336 | -0.717067626 | 0.252787391 | -2.836643172 | 0.004559053 | 0.042167413 |
| NUMB     | 4181.315769 | 0.182428514  | 0.064330086 | 2.835819532  | 0.004570827 | 0.04225602  |
| CD14     | 3176.708984 | -0.373402726 | 0.131686133 | -2.835550853 | 0.004574673 | 0.042271296 |
| MCM4     | 201.9058716 | 0.337106475  | 0.118895923 | 2.835307263  | 0.004578163 | 0.042283264 |
| HAUS3    | 2.861678863 | 1.358144457  | 0.479039425 | 2.835141297  | 0.004580542 | 0.042284967 |
| SWAP70   | 1174.003799 | -0.232154648 | 0.081899962 | -2.834612421 | 0.004588131 | 0.042334739 |
| CENPF    | 16.64893644 | -0.585907783 | 0.206809896 | -2.833074218 | 0.004610268 | 0.042518633 |
| ITFG3    | 315.1053785 | -0.202626638 | 0.07158329  | -2.830641586 | 0.004645475 | 0.042822829 |
| NECAP1   | 928.6753381 | 0.222822024  | 0.078724232 | 2.830412161  | 0.004648807 | 0.042833058 |
| TCFL5    | 19.28929331 | -0.756463815 | 0.267282961 | -2.83019843  | 0.004651914 | 0.042841195 |
| ETFB     | 231.5930338 | -0.29367209  | 0.103770972 | -2.830002315 | 0.004654767 | 0.042846983 |
| CLN3     | 566.4023545 | -0.172531825 | 0.060984931 | -2.829089461 | 0.004668065 | 0.042948871 |
| DOCK3    | 101.9854877 | 0.375545593  | 0.132801928 | 2.82786251   | 0.004685993 | 0.043072679 |
| MCM5     | 261.8117686 | -0.306195785 | 0.108274989 | -2.827945644 | 0.004684776 | 0.043072679 |
| TMEM176  | 1117.828834 | -0.382827788 | 0.135453886 | -2.826259183 | 0.004709514 | 0.043268239 |
| SYPL1    | 707.8416372 | -0.13084548  | 0.046301482 | -2.825945862 | 0.004714123 | 0.04328994  |
| PTGIR    | 7.079697021 | 1.000425     | 0.354056346 | 2.825609572  | 0.004719074 | 0.043314764 |
| GPR34    | 57.02716858 | -0.596931539 | 0.211296577 | -2.825088543 | 0.004726755 | 0.043364603 |
| DOCK5    | 363.1501367 | 0.279588345  | 0.099012602 | 2.823765242  | 0.004746314 | 0.0435049   |
| SACM1L   | 1101.566364 | 0.147645219  | 0.052286961 | 2.823748336  | 0.004746564 | 0.0435049   |
| PDCD6IP  | 3044.745128 | -0.246329934 | 0.087242916 | -2.823494978 | 0.004750317 | 0.043518596 |
| ZNF513   | 83.83449874 | 0.325854177  | 0.115438694 | 2.822746576  | 0.004761419 | 0.043599573 |
| FERMT1   | 1.502823436 | 2.219751561  | 0.786590095 | 2.821992771  | 0.004772625 | 0.043681425 |
| SLC22A23 | 4.584284651 | 0.961793145  | 0.34086951  | 2.821587493  | 0.00477866  | 0.04371589  |
| SLC25A29 | 134.1675909 | -0.381680695 | 0.135296866 | -2.821060863 | 0.004786512 | 0.04376694  |
| S100A3   | 4.48457931  | 1.291828596  | 0.457952655 | 2.820878059  | 0.00478924  | 0.043771113 |
| AMMECR1  | 183.7684237 | 0.244049857  | 0.086523228 | 2.820628212  | 0.004792972 | 0.043784443 |
| HMGCR    | 311.4087169 | 0.184765634  | 0.065518256 | 2.820063371  | 0.004801417 | 0.043831735 |

|           |             |              |             |              |             |             |
|-----------|-------------|--------------|-------------|--------------|-------------|-------------|
| RAB11FIP3 | 100.2323873 | -0.265454826 | 0.094133661 | -2.819977702 | 0.004802699 | 0.043831735 |
| PDZD7     | 26.99736513 | -0.630026229 | 0.223455084 | -2.81947592  | 0.004810214 | 0.043877347 |
| WHAMM     | 341.4538952 | 0.244187912  | 0.086611729 | 2.819340015  | 0.004812251 | 0.043877347 |
| WLS       | 388.6549857 | -0.248981864 | 0.088369189 | -2.817518932 | 0.004839626 | 0.044106072 |
| RRM2B     | 122.7930714 | -0.233935729 | 0.08306727  | -2.816220272 | 0.004859234 | 0.044263829 |
| ZER1      | 250.02074   | -0.217994755 | 0.077418607 | -2.8157928   | 0.004865704 | 0.044301818 |
| LGALS8    | 888.1381081 | 0.184770348  | 0.065640973 | 2.814863016  | 0.004879803 | 0.044409203 |
| ZDHC5     | 903.0267723 | 0.226220808  | 0.080373338 | 2.814625026  | 0.004883418 | 0.044421118 |
| ADH5      | 1563.98276  | -0.194535966 | 0.069127786 | -2.814150119 | 0.004890638 | 0.044465804 |
| AKAP11    | 312.8273846 | -0.174652545 | 0.062066059 | -2.813978326 | 0.004893253 | 0.044468588 |
| ANLN      | 11.83502886 | -0.757108101 | 0.269105845 | -2.813421242 | 0.004901739 | 0.044488082 |
| GPR157    | 300.9206328 | -0.219844645 | 0.078142457 | -2.813382802 | 0.004902325 | 0.044488082 |
| XRN1      | 168.2596343 | 0.484948279  | 0.172368947 | 2.813431812  | 0.004901578 | 0.044488082 |
| CBX8      | 27.79868036 | -0.403222176 | 0.143334473 | -2.8131556   | 0.004905791 | 0.04449857  |
| COMMD7    | 20.11411896 | -0.550004329 | 0.195523093 | -2.812989099 | 0.004908332 | 0.044500666 |
| ZNF326    | 94.61619168 | 0.276179468  | 0.098243638 | 2.811168976  | 0.004936185 | 0.044732149 |
| TLE6      | 6.220834938 | -1.640364259 | 0.583558636 | -2.810967325 | 0.00493928  | 0.04473915  |
| PDCD6     | 919.1316586 | -0.154636841 | 0.055015181 | -2.810803081 | 0.004941802 | 0.044740958 |
| GLRX5     | 586.583274  | -0.161631154 | 0.057507097 | -2.810629704 | 0.004944466 | 0.044744046 |
| NMI       | 279.7039791 | 0.305585837  | 0.108771954 | 2.809417549  | 0.004963123 | 0.044870731 |
| PVRL4     | 8.003138622 | -0.897379186 | 0.319414125 | -2.809453669 | 0.004962566 | 0.044870731 |
| LRP3      | 14.98467468 | -0.515512448 | 0.183517863 | -2.80905869  | 0.004968659 | 0.044899709 |
| SLC25A32  | 650.0826929 | 0.331452808  | 0.1180057   | 2.808786413  | 0.004972863 | 0.04491663  |
| TNPO2     | 116.3959605 | 0.254355548  | 0.090574387 | 2.808250271  | 0.00498115  | 0.0449704   |
| FGD2      | 232.0141237 | 0.321560773  | 0.114542736 | 2.807343227  | 0.004995199 | 0.045076112 |
| USP25     | 848.8947223 | 0.190892013  | 0.068056152 | 2.804919295  | 0.005032918 | 0.045395224 |
| MAPKAPK5  | 61.56236204 | -0.306108718 | 0.109221961 | -2.802629759 | 0.005068782 | 0.045697313 |
| ELL2      | 2899.50955  | 0.243281648  | 0.086851093 | 2.801135129  | 0.005092319 | 0.045888035 |
| AIG1      | 98.99376576 | -0.376793969 | 0.134551261 | -2.800374863 | 0.005104329 | 0.045931812 |
| ANKRD1    | 4.396790313 | 1.598341219  | 0.570748278 | 2.800431085  | 0.00510344  | 0.045931812 |
| SEC61B    | 2257.283482 | 0.259419187  | 0.092631532 | 2.800549468  | 0.005101569 | 0.045931812 |
| APBA3     | 354.9945636 | 0.204263381  | 0.072959113 | 2.799696599  | 0.005115066 | 0.046006937 |
| AAMDC     | 82.381955   | -0.305992434 | 0.109316174 | -2.799150612 | 0.005123723 | 0.0460633   |
| HLA-DQA1  | 7063.402962 | 0.368894831  | 0.131817466 | 2.798527698  | 0.005133617 | 0.046130717 |
| PTPRC     | 546.6343534 | 0.22561596   | 0.080628429 | 2.798218481  | 0.005138534 | 0.046135419 |
| SIRPD     | 19.64793153 | -0.626074448 | 0.223742358 | -2.798193656 | 0.005138929 | 0.046135419 |
| AACS      | 99.77379703 | 0.260993714  | 0.093291677 | 2.797609854  | 0.005148226 | 0.046197353 |
| FBXW7     | 237.8891233 | 0.176187092  | 0.063007659 | 2.796280537  | 0.005169451 | 0.046366218 |
| C11orf96  | 26.43162105 | 0.891064547  | 0.318771557 | 2.79530757   | 0.005185036 | 0.046484366 |
| COA1      | 298.216718  | -0.225778344 | 0.080779424 | -2.794998189 | 0.005190001 | 0.046507233 |
| FAM104A   | 356.7846086 | 0.156634745  | 0.056044939 | 2.794806239  | 0.005193083 | 0.04651322  |
| TTC19     | 181.3519808 | -0.174096283 | 0.062311041 | -2.793987724 | 0.005206246 | 0.046609445 |
| C7orf43   | 784.2630911 | 0.281848882  | 0.100887358 | 2.793698706  | 0.0052109   | 0.04662945  |
| DDX10     | 549.9213854 | 0.165563161  | 0.059282395 | 2.792788002  | 0.005225593 | 0.046739215 |
| AVPI1     | 923.3217256 | -0.206837111 | 0.074069933 | -2.792457133 | 0.00523094  | 0.04676533  |
| IL1R1     | 38.59793554 | 0.539536759  | 0.193294929 | 2.791261837  | 0.005250298 | 0.046916624 |
| MYEOV2    | 1733.661433 | -0.207833115 | 0.074463181 | -2.791085657 | 0.005253157 | 0.046920408 |

|          |             |              |             |              |             |             |
|----------|-------------|--------------|-------------|--------------|-------------|-------------|
| EIF4E    | 1461.090631 | 0.231101515  | 0.082853447 | 2.789280644  | 0.005282527 | 0.047160871 |
| EHMT2    | 201.1780008 | -0.254829025 | 0.091383598 | -2.788564142 | 0.005294226 | 0.047243429 |
| RPL27    | 5839.699349 | -0.192726267 | 0.069138236 | -2.787549679 | 0.005310831 | 0.047369663 |
| EMR2     | 1066.012872 | 0.233604292  | 0.0838464   | 2.786098047  | 0.005334673 | 0.047560304 |
| NMB      | 347.090275  | -0.379422173 | 0.136254547 | -2.784656966 | 0.005358438 | 0.047750076 |
| PTBP1    | 2647.563281 | 0.293269958  | 0.105450938 | 2.78110335   | 0.005417449 | 0.048253614 |
| ACYP2    | 223.8866005 | 0.344908837  | 0.124053657 | 2.780319782  | 0.005430539 | 0.048320693 |
| GSTP1    | 4929.658299 | -0.226833151 | 0.081588721 | -2.780202329 | 0.005432504 | 0.048320693 |
| PRKCB    | 131.2645428 | 0.399633426  | 0.143739613 | 2.780259515  | 0.005431547 | 0.048320693 |
| XIAP     | 510.3295503 | 0.177471835  | 0.063837818 | 2.780042321  | 0.005435181 | 0.048322199 |
| NCF1C    | 683.019909  | -0.267670858 | 0.096363256 | -2.777727421 | 0.005474052 | 0.048645333 |
| TMEM245  | 618.7473063 | -0.208958246 | 0.075286055 | -2.77552393  | 0.005511284 | 0.048953621 |
| SRRT     | 334.2692665 | 0.273241026  | 0.098452091 | 2.775370474  | 0.005513886 | 0.048954158 |
| CACFD1   | 27.62637796 | -0.40103893  | 0.144552905 | -2.774340164 | 0.005531381 | 0.049086864 |
| IFT122   | 169.226172  | -0.210029703 | 0.075716753 | -2.773886804 | 0.005539095 | 0.049132689 |
| SNURF    | 99.23488897 | -0.365681929 | 0.131980585 | -2.77072518  | 0.005593161 | 0.049589435 |
| RAD9A    | 89.09334453 | 0.2435239    | 0.087968031 | 2.768322731  | 0.005634563 | 0.049933527 |
| CGNL1    | 1.89049144  | 2.378515951  | 0.859270678 | 2.768063676  | 0.005639044 | 0.04995026  |
| SLC25A33 | 174.5825788 | 0.217825861  | 0.078698607 | 2.767849024  | 0.005642759 | 0.049958105 |
| VBP1     | 762.3100344 | 0.188968659  | 0.068276105 | 2.767712934  | 0.005645116 | 0.049958105 |

for AMs  
oint.































































































**Additional file 6: Table S4. Differential expression of RNAs control versus *M.tb* infected AMs in all 28 donor AMs at 2h, 24h and 72h (Suppl. Tables S4A, B, and C), using separate non-infected control AMs for each time point.**

| S4C: 72h   |             |                |             |              |          |          |
|------------|-------------|----------------|-------------|--------------|----------|----------|
| Gene       | baseMean    | log2FoldChange | lfcSE       | stat         | pvalue   | padj     |
| RSAD2      | 2766.166392 | 4.912946254    | 0.278596558 | 17.6346265   | 1.34E-69 | 2.49E-65 |
| INHBA      | 1589.223749 | 4.704128144    | 0.298514944 | 15.75843434  | 6.01E-56 | 3.73E-52 |
| TNFAIP6    | 6758.379874 | 5.024082354    | 0.31833882  | 15.78218562  | 4.13E-56 | 3.73E-52 |
| CCL20      | 741.8013063 | 5.442185696    | 0.350716164 | 15.51735063  | 2.65E-54 | 9.87E-51 |
| GCH1       | 222.5524284 | 3.149521133    | 0.202884759 | 15.52369509  | 2.40E-54 | 9.87E-51 |
| CCL4       | 2974.633871 | 3.50536249     | 0.226630075 | 15.46733149  | 5.76E-54 | 1.79E-50 |
| AMICA1     | 301.6239116 | -2.201229689   | 0.154924876 | -14.20836824 | 8.13E-46 | 2.16E-42 |
| DUSP5      | 476.0351968 | 1.894539217    | 0.133440894 | 14.19759083  | 9.48E-46 | 2.21E-42 |
| ISG20      | 122.6101873 | 4.931518474    | 0.348843835 | 14.13675113  | 2.25E-45 | 4.67E-42 |
| HSD11B1    | 418.4518623 | 3.264902195    | 0.232085399 | 14.06767596  | 6.00E-45 | 1.12E-41 |
| SLC46A1    | 214.4879827 | -2.208056161   | 0.15705516  | -14.05911251 | 6.77E-45 | 1.15E-41 |
| PARP14     | 2221.977369 | 1.09076621     | 0.078136802 | 13.95969871  | 2.75E-44 | 4.26E-41 |
| GBP1       | 3987.926154 | 2.269253112    | 0.164831025 | 13.76714794  | 4.02E-43 | 5.76E-40 |
| ISG15      | 2322.407963 | 3.042976714    | 0.222291986 | 13.6890977   | 1.18E-42 | 1.57E-39 |
| GBP4       | 829.6809044 | 1.593093439    | 0.118418958 | 13.45302698  | 2.96E-41 | 3.67E-38 |
| DDX60      | 541.9428301 | 1.420289236    | 0.105611976 | 13.4481835   | 3.16E-41 | 3.67E-38 |
| MX1        | 5014.427796 | 2.317716106    | 0.178746178 | 12.96652123  | 1.89E-38 | 2.08E-35 |
| MT2A       | 9296.041803 | 2.57891486     | 0.198986085 | 12.96027743  | 2.06E-38 | 2.13E-35 |
| IFI6       | 17405.81014 | 2.13935216     | 0.165889432 | 12.89625345  | 4.73E-38 | 4.63E-35 |
| DENND5A    | 1840.833712 | 0.90270097     | 0.070175393 | 12.86349712  | 7.22E-38 | 6.73E-35 |
| LAP3       | 6161.425629 | 1.386212939    | 0.108939729 | 12.72458584  | 4.32E-37 | 3.83E-34 |
| DDX58      | 1316.752241 | 1.676124395    | 0.132996934 | 12.60272956  | 2.04E-36 | 1.66E-33 |
| EIF2AK2    | 1660.364012 | 1.423201061    | 0.112929968 | 12.60251008  | 2.05E-36 | 1.66E-33 |
| CCL15      | 447.0541085 | 3.561820127    | 0.283849539 | 12.54826813  | 4.06E-36 | 3.15E-33 |
| IRF7       | 1201.154915 | 2.144264023    | 0.171147333 | 12.52876095  | 5.20E-36 | 3.87E-33 |
| CXCL10     | 870.2579647 | 5.585627367    | 0.447468287 | 12.48273349  | 9.27E-36 | 6.65E-33 |
| DHX58      | 275.3946294 | 1.574567754    | 0.129377125 | 12.17037208  | 4.47E-34 | 3.09E-31 |
| PLSCR1     | 2242.680524 | 1.211268365    | 0.100193533 | 12.08928689  | 1.20E-33 | 8.01E-31 |
| TAP1       | 2681.04615  | 1.7444439      | 0.144647287 | 12.0599835   | 1.72E-33 | 1.10E-30 |
| CFB        | 1057.334343 | 2.129105382    | 0.178067886 | 11.9567061   | 5.99E-33 | 3.72E-30 |
| PCED1B-AS1 | 250.6489094 | -1.722730348   | 0.144205036 | -11.94639519 | 6.78E-33 | 4.08E-30 |
| IL7R       | 1092.261596 | 2.337986614    | 0.195863055 | 11.9368434   | 7.61E-33 | 4.43E-30 |
| USP18      | 300.4633859 | 2.522472499    | 0.212719279 | 11.85822231  | 1.95E-32 | 1.10E-29 |
| OAS3       | 1927.81696  | 2.192065824    | 0.185080395 | 11.84385751  | 2.32E-32 | 1.27E-29 |
| APMAP      | 1007.919348 | -0.76067966    | 0.064340367 | -11.82274358 | 2.98E-32 | 1.59E-29 |
| IFITM3     | 1329.295818 | 2.404214647    | 0.204214841 | 11.77296733  | 5.38E-32 | 2.78E-29 |
| PARP9      | 439.2009568 | 1.622455721    | 0.137843289 | 11.77029168  | 5.55E-32 | 2.80E-29 |
| IFITM1     | 1202.969255 | 2.409818839    | 0.205110503 | 11.74888074  | 7.16E-32 | 3.51E-29 |
| CCL3       | 2341.89353  | 2.386573624    | 0.204115495 | 11.69227073  | 1.40E-31 | 6.67E-29 |
| ATF3       | 1732.626154 | 1.183190005    | 0.101266107 | 11.68396849  | 1.54E-31 | 7.17E-29 |
| TAP2       | 1042.801022 | 1.282061881    | 0.110455508 | 11.60704348  | 3.80E-31 | 1.72E-28 |
| IFIT1      | 737.6343114 | 2.990994854    | 0.258123489 | 11.58745712  | 4.77E-31 | 2.12E-28 |
| HERC6      | 197.838323  | 1.938677731    | 0.16956914  | 11.43296316  | 2.86E-30 | 1.24E-27 |
| CYP27B1    | 238.3203023 | 2.945249934    | 0.258100488 | 11.41125286  | 3.67E-30 | 1.56E-27 |

|          |             |              |             |              |          |          |
|----------|-------------|--------------|-------------|--------------|----------|----------|
| CCL5     | 1058.348222 | 2.931077686  | 0.257452285 | 11.38493559  | 4.97E-30 | 2.06E-27 |
| CD274    | 1261.138089 | 1.874900762  | 0.165263726 | 11.34490189  | 7.86E-30 | 3.18E-27 |
| PVALB    | 324.2809752 | -1.744078735 | 0.153965048 | -11.32775755 | 9.56E-30 | 3.79E-27 |
| CXCL11   | 58.5470209  | 6.26355157   | 0.558115236 | 11.22268515  | 3.16E-29 | 1.22E-26 |
| APOC2    | 2469.901298 | -0.947206379 | 0.084511323 | -11.20804103 | 3.72E-29 | 1.39E-26 |
| HCAR3    | 118.1955462 | 1.952025123  | 0.174160356 | 11.20820586  | 3.72E-29 | 1.39E-26 |
| SLC27A1  | 409.9289624 | -0.959618396 | 0.085879494 | -11.17401084 | 5.47E-29 | 2.00E-26 |
| NUB1     | 1168.309329 | 0.989962293  | 0.088709551 | 11.15959085  | 6.43E-29 | 2.30E-26 |
| TBXAS1   | 1061.145358 | -0.729772197 | 0.065415415 | -11.15596686 | 6.70E-29 | 2.35E-26 |
| MMP2     | 289.6741024 | -1.291387165 | 0.115915986 | -11.14071675 | 7.95E-29 | 2.74E-26 |
| TNF      | 404.1194724 | 1.769861229  | 0.159050901 | 11.12764036  | 9.20E-29 | 3.12E-26 |
| IL8      | 10902.81257 | 3.545304826  | 0.318915345 | 11.11675834  | 1.04E-28 | 3.46E-26 |
| SP110    | 124.3002386 | 1.145559185  | 0.10310926  | 11.11014844  | 1.12E-28 | 3.66E-26 |
| IDO1     | 1430.348017 | 5.278127417  | 0.476004459 | 11.0883991   | 1.43E-28 | 4.51E-26 |
| SLA      | 1837.70283  | -1.164793013 | 0.105042199 | -11.08881022 | 1.42E-28 | 4.51E-26 |
| IFIT3    | 339.5508923 | 2.182106406  | 0.197046327 | 11.07407806  | 1.68E-28 | 5.20E-26 |
| SORL1    | 449.2567445 | -1.394893211 | 0.126205392 | -11.05256435 | 2.13E-28 | 6.51E-26 |
| HERC5    | 772.4780296 | 1.802035743  | 0.164637438 | 10.94547971  | 6.98E-28 | 2.10E-25 |
| SERPINE1 | 1289.02002  | 2.147360197  | 0.196457918 | 10.93038256  | 8.25E-28 | 2.44E-25 |
| CFP      | 1022.458724 | -2.019951444 | 0.185098675 | -10.91283577 | 1.00E-27 | 2.87E-25 |
| EDN1     | 376.4675399 | 3.722651047  | 0.341106019 | 10.91347218  | 9.94E-28 | 2.87E-25 |
| CHMP5    | 2554.279105 | 0.832240721  | 0.076350989 | 10.90019564  | 1.15E-27 | 3.25E-25 |
| FAM129A  | 1785.228785 | 0.945454443  | 0.086786811 | 10.89398755  | 1.23E-27 | 3.42E-25 |
| KIAA1462 | 115.3218534 | 3.306321166  | 0.304133075 | 10.87129759  | 1.58E-27 | 4.33E-25 |
| MT1E     | 652.8391469 | 2.592876053  | 0.238733219 | 10.86097722  | 1.77E-27 | 4.78E-25 |
| IL15RA   | 550.736194  | 1.599772569  | 0.148674208 | 10.76025621  | 5.30E-27 | 1.41E-24 |
| GPX1     | 17708.2123  | -0.472746566 | 0.043970907 | -10.75134894 | 5.84E-27 | 1.53E-24 |
| CA12     | 115.4887448 | 5.304719422  | 0.493594298 | 10.74712459  | 6.11E-27 | 1.58E-24 |
| CD180    | 107.4836498 | -2.797711456 | 0.260564778 | -10.73710531 | 6.81E-27 | 1.74E-24 |
| APOC1    | 11512.39423 | -1.165106105 | 0.10853132  | -10.73520621 | 6.96E-27 | 1.75E-24 |
| CD101    | 446.4578966 | -1.673527837 | 0.156220875 | -10.712575   | 8.89E-27 | 2.21E-24 |
| FCN1     | 113.0727082 | -2.239521806 | 0.209393539 | -10.69527656 | 1.07E-26 | 2.63E-24 |
| SOD2     | 40415.61856 | 1.494327972  | 0.14017155  | 10.66070808  | 1.55E-26 | 3.76E-24 |
| SLAMF7   | 3641.902894 | 1.678641859  | 0.158208718 | 10.61029937  | 2.67E-26 | 6.38E-24 |
| CP       | 342.6400297 | 4.299839563  | 0.406090131 | 10.58838725  | 3.37E-26 | 7.96E-24 |
| CMPK2    | 899.2343634 | 2.67594995   | 0.25338719  | 10.5607152   | 4.53E-26 | 1.06E-23 |
| HCAR2    | 117.7607998 | 2.130306631  | 0.20185798  | 10.55349229  | 4.89E-26 | 1.13E-23 |
| TNS1     | 868.6747094 | -1.284127242 | 0.122078541 | -10.51886132 | 7.07E-26 | 1.61E-23 |
| MTF1     | 530.6519809 | 1.000704251  | 0.095148471 | 10.51729197  | 7.19E-26 | 1.61E-23 |
| PSME2    | 1534.389497 | 1.100478047  | 0.104768211 | 10.50393091  | 8.29E-26 | 1.84E-23 |
| MT1H     | 1637.737026 | 3.988660452  | 0.379885967 | 10.49962566  | 8.67E-26 | 1.90E-23 |
| IFIT2    | 1584.107584 | 2.066882772  | 0.197514964 | 10.46443636  | 1.26E-25 | 2.73E-23 |
| C15orf48 | 3458.535489 | 1.893377838  | 0.181084795 | 10.45575271  | 1.38E-25 | 2.95E-23 |
| HAMP     | 185.648606  | -1.964881907 | 0.188198962 | -10.44045028 | 1.62E-25 | 3.43E-23 |
| FNIP2    | 2034.43235  | 0.880503018  | 0.08441354  | 10.4308268   | 1.79E-25 | 3.75E-23 |
| IFI44L   | 468.4473681 | 3.918083374  | 0.376015792 | 10.41999686  | 2.01E-25 | 4.16E-23 |
| ABTB2    | 58.51100617 | 2.252638708  | 0.217109699 | 10.37557841  | 3.20E-25 | 6.56E-23 |
| OASL     | 420.2742717 | 1.809657206  | 0.174474882 | 10.37202139  | 3.32E-25 | 6.72E-23 |
| SAMD9L   | 508.4629199 | 1.489439716  | 0.143613818 | 10.37114487  | 3.35E-25 | 6.72E-23 |

|          |             |              |             |              |          |          |
|----------|-------------|--------------|-------------|--------------|----------|----------|
| RNF213   | 2198.399036 | 0.827722097  | 0.080126283 | 10.33021953  | 5.14E-25 | 1.02E-22 |
| S100A16  | 216.3885508 | 1.861681979  | 0.180274568 | 10.32692518  | 5.32E-25 | 1.04E-22 |
| GBP5     | 1350.007194 | 2.354465415  | 0.228037795 | 10.32489116  | 5.44E-25 | 1.06E-22 |
| TMEM132, | 131.106302  | 2.495729317  | 0.243042538 | 10.26869344  | 9.75E-25 | 1.87E-22 |
| ZNFX1    | 1083.590849 | 1.080947699  | 0.105563951 | 10.23974268  | 1.32E-24 | 2.50E-22 |
| PML      | 355.8278722 | 1.454560492  | 0.142400979 | 10.21453995  | 1.71E-24 | 3.21E-22 |
| SLC39A8  | 1342.242482 | 1.992889426  | 0.195372779 | 10.20044573  | 1.97E-24 | 3.68E-22 |
| PLEKHM3  | 578.5265059 | 0.849872802  | 0.083458752 | 10.18314775  | 2.36E-24 | 4.35E-22 |
| GPR34    | 230.4374221 | -2.164033835 | 0.213364881 | -10.14240873 | 3.58E-24 | 6.54E-22 |
| DTX3L    | 1300.4399   | 0.810374678  | 0.079921332 | 10.13965428  | 3.68E-24 | 6.60E-22 |
| RASGEF1B | 1386.449703 | 0.727803728  | 0.071771517 | 10.1405649   | 3.65E-24 | 6.60E-22 |
| TREM2    | 2341.249012 | -1.323681721 | 0.130593333 | -10.13590578 | 3.83E-24 | 6.79E-22 |
| ZNF697   | 158.1350193 | 1.028435855  | 0.10218939  | 10.06401794  | 7.97E-24 | 1.40E-21 |
| GP1BA    | 38.99770464 | 3.58931006   | 0.358334513 | 10.01664626  | 1.29E-23 | 2.24E-21 |
| IFIT5    | 294.8087678 | 1.304902081  | 0.13028783  | 10.01553316  | 1.30E-23 | 2.25E-21 |
| MT1G     | 301.4058655 | 3.877751981  | 0.38723744  | 10.01388703  | 1.32E-23 | 2.26E-21 |
| TSC22D1  | 1741.409104 | 1.387912981  | 0.138649335 | 10.01023904  | 1.37E-23 | 2.33E-21 |
| MPZL2    | 245.0265714 | -1.19550628  | 0.11952295  | -10.00231567 | 1.49E-23 | 2.50E-21 |
| C1S      | 1082.185596 | 1.675232461  | 0.167508741 | 10.00086596  | 1.51E-23 | 2.51E-21 |
| IL1RN    | 11877.21319 | 1.18378822   | 0.118420606 | 9.996471584  | 1.58E-23 | 2.60E-21 |
| AIF1     | 1914.490832 | -1.204311448 | 0.120662639 | -9.980814741 | 1.85E-23 | 3.02E-21 |
| NFKB2    | 1444.096116 | 1.176460617  | 0.11789751  | 9.978672255  | 1.89E-23 | 3.06E-21 |
| AMPD3    | 655.7629627 | 1.323543746  | 0.132772388 | 9.968516571  | 2.09E-23 | 3.36E-21 |
| SGPP2    | 30.91527904 | 4.823623143  | 0.484271113 | 9.960584096  | 2.27E-23 | 3.61E-21 |
| HADH     | 391.1493115 | -1.033292891 | 0.103886434 | -9.946369784 | 2.62E-23 | 4.13E-21 |
| CIDEB    | 63.98620249 | -2.09931081  | 0.211475956 | -9.926947965 | 3.18E-23 | 4.98E-21 |
| HAPLN3   | 79.41565647 | 3.193595517  | 0.322691397 | 9.896748234  | 4.30E-23 | 6.68E-21 |
| NEURL3   | 44.14800248 | 4.013884864  | 0.405728018 | 9.893043327  | 4.46E-23 | 6.87E-21 |
| NAIP     | 250.4221679 | -1.261435718 | 0.128450644 | -9.820392359 | 9.20E-23 | 1.40E-20 |
| EMP1     | 1055.798164 | 1.02807715   | 0.104722065 | 9.817197044  | 9.49E-23 | 1.43E-20 |
| ETV7     | 16.18436872 | 3.420683831  | 0.348450982 | 9.816829367  | 9.53E-23 | 1.43E-20 |
| CTTN     | 481.6368911 | 1.799225073  | 0.183469941 | 9.806647663  | 1.05E-22 | 1.57E-20 |
| HELZ2    | 164.1388679 | 2.758407713  | 0.281421391 | 9.801698804  | 1.11E-22 | 1.64E-20 |
| PPBP     | 55.89162593 | 3.722882874  | 0.380539047 | 9.783182307  | 1.33E-22 | 1.95E-20 |
| PDLIM4   | 231.2708331 | 1.800260944  | 0.184659852 | 9.749065223  | 1.86E-22 | 2.71E-20 |
| AK4      | 251.3012323 | 1.480147192  | 0.151853806 | 9.747185324  | 1.90E-22 | 2.74E-20 |
| LDLR     | 248.0545692 | 2.607715683  | 0.267593107 | 9.745077933  | 1.94E-22 | 2.78E-20 |
| PHLDA2   | 85.23705958 | 1.201206519  | 0.123333438 | 9.739504057  | 2.05E-22 | 2.91E-20 |
| TP53BP2  | 975.2876902 | 0.734546628  | 0.075487109 | 9.730755846  | 2.23E-22 | 3.15E-20 |
| GOS2     | 1765.142826 | 3.629002678  | 0.37308578  | 9.72699275   | 2.31E-22 | 3.24E-20 |
| SEMA4D   | 838.2322886 | 1.3037253    | 0.134057881 | 9.72509258   | 2.36E-22 | 3.28E-20 |
| STAT1    | 7603.745133 | 1.682764921  | 0.173099554 | 9.72137062   | 2.44E-22 | 3.37E-20 |
| IFI27    | 3112.567635 | 1.58217176   | 0.162956932 | 9.709140579  | 2.76E-22 | 3.78E-20 |
| IL3RA    | 102.4733616 | 3.659943266  | 0.377348511 | 9.699106146  | 3.04E-22 | 4.14E-20 |
| BIRC3    | 394.4694124 | 1.056631001  | 0.109024638 | 9.691671681  | 3.27E-22 | 4.42E-20 |
| TSPAN3   | 2615.421522 | 0.959783028  | 0.099083742 | 9.686584397  | 3.44E-22 | 4.61E-20 |
| PTGS2    | 254.0264258 | 2.871438618  | 0.296505557 | 9.684265774  | 3.52E-22 | 4.68E-20 |
| TGFBI    | 4883.406575 | -1.407917541 | 0.145599412 | -9.669802385 | 4.05E-22 | 5.34E-20 |
| ZC3H12A  | 355.9599856 | 1.603544358  | 0.165838449 | 9.669315915  | 4.07E-22 | 5.34E-20 |

|          |             |              |             |              |          |          |
|----------|-------------|--------------|-------------|--------------|----------|----------|
| STAB1    | 20.28398965 | -3.412805519 | 0.35312648  | -9.664541491 | 4.27E-22 | 5.56E-20 |
| TMEM86A  | 584.9591892 | -0.96509504  | 0.099928403 | -9.657865118 | 4.55E-22 | 5.89E-20 |
| MICALL1  | 638.6245434 | 0.71078306   | 0.073686079 | 9.646096983  | 5.11E-22 | 6.56E-20 |
| STAT2    | 2097.829383 | 1.074877916  | 0.112002628 | 9.596899102  | 8.24E-22 | 1.05E-19 |
| KDM6B    | 458.7156876 | 0.90738978   | 0.094570954 | 9.594804154  | 8.41E-22 | 1.07E-19 |
| MTHFD2   | 3052.802778 | 0.908179196  | 0.094877929 | 9.572080774  | 1.05E-21 | 1.32E-19 |
| KYNU     | 300.5266468 | 1.329186962  | 0.138918644 | 9.568096317  | 1.09E-21 | 1.36E-19 |
| JAG1     | 174.8171111 | 1.49754911   | 0.156819634 | 9.549500093  | 1.30E-21 | 1.62E-19 |
| GRAMD1A  | 1224.909816 | 1.699305205  | 0.178462202 | 9.52193342   | 1.70E-21 | 2.10E-19 |
| SLC7A11  | 1486.120197 | 1.629426791  | 0.171434874 | 9.504640196  | 2.01E-21 | 2.46E-19 |
| ELOVL7   | 173.9142272 | 2.133740279  | 0.224612561 | 9.499648045  | 2.11E-21 | 2.56E-19 |
| HIP1     | 479.5904614 | 1.286610544  | 0.135466946 | 9.497597637  | 2.15E-21 | 2.60E-19 |
| CTSF     | 93.41506505 | -1.486355898 | 0.156582121 | -9.492500745 | 2.26E-21 | 2.71E-19 |
| TNFSF10  | 189.2661746 | 2.153299795  | 0.226874289 | 9.49115832   | 2.28E-21 | 2.73E-19 |
| AIG1     | 182.7069456 | -1.245925642 | 0.131367226 | -9.484295916 | 2.44E-21 | 2.90E-19 |
| CABLES1  | 558.105261  | -1.062295869 | 0.112020577 | -9.483042288 | 2.47E-21 | 2.91E-19 |
| IL6      | 110.8269696 | 5.53483502   | 0.584211736 | 9.474022309  | 2.69E-21 | 3.16E-19 |
| MMP12    | 255.0258503 | 1.876851757  | 0.198166514 | 9.471084265  | 2.77E-21 | 3.23E-19 |
| TNIP1    | 2949.643648 | 1.168473829  | 0.123508605 | 9.460667366  | 3.06E-21 | 3.54E-19 |
| XAF1     | 298.231981  | 1.88838232   | 0.199877045 | 9.447719805  | 3.46E-21 | 3.98E-19 |
| JUNB     | 2184.750238 | 0.882946953  | 0.093536342 | 9.439613844  | 3.74E-21 | 4.28E-19 |
| OCSTAMP  | 212.9800934 | 2.1524261    | 0.228180425 | 9.433000646  | 3.99E-21 | 4.53E-19 |
| CCL3L3   | 307.6899487 | 2.490609589  | 0.264289675 | 9.423786932  | 4.35E-21 | 4.91E-19 |
| GBP1P1   | 50.36034405 | 4.033499804  | 0.42827027  | 9.418117696  | 4.59E-21 | 5.12E-19 |
| NLRC5    | 368.4602274 | 0.781556655  | 0.082979411 | 9.418681666  | 4.57E-21 | 5.12E-19 |
| APOL1    | 1015.315051 | 0.841917358  | 0.089491081 | 9.40783539   | 5.06E-21 | 5.62E-19 |
| ALDH7A1  | 101.0741073 | -0.644303229 | 0.068522964 | -9.402734401 | 5.32E-21 | 5.86E-19 |
| IRAK2    | 78.29556686 | 1.721960302  | 0.183302024 | 9.394115032  | 5.77E-21 | 6.32E-19 |
| CCL22    | 13518.87543 | 1.907875845  | 0.203319026 | 9.38365621   | 6.37E-21 | 6.90E-19 |
| VNN2     | 256.2252571 | -0.896532759 | 0.09554208  | -9.383642869 | 6.37E-21 | 6.90E-19 |
| CERK     | 750.3636364 | -0.837412597 | 0.089465633 | -9.360159543 | 7.96E-21 | 8.56E-19 |
| VEGFB    | 994.1393424 | -0.681964375 | 0.072861129 | -9.359783271 | 7.99E-21 | 8.56E-19 |
| CD40     | 1347.850585 | 1.134959396  | 0.121278814 | 9.358265942  | 8.11E-21 | 8.63E-19 |
| CAT      | 2343.331438 | -0.682117833 | 0.073048254 | -9.337907393 | 9.83E-21 | 1.04E-18 |
| ANGPT4   | 37.72767145 | -3.000038296 | 0.321568304 | -9.329396757 | 1.06E-20 | 1.12E-18 |
| IFI35    | 1371.554659 | 1.629164128  | 0.174672789 | 9.326948626  | 1.09E-20 | 1.14E-18 |
| RTP4     | 245.7044903 | 1.251144999  | 0.134155345 | 9.326091319  | 1.10E-20 | 1.14E-18 |
| HESX1    | 44.01114912 | 2.628347681  | 0.282666959 | 9.298390208  | 1.43E-20 | 1.48E-18 |
| TNIP3    | 412.9034906 | 2.070062231  | 0.222682009 | 9.296046127  | 1.46E-20 | 1.50E-18 |
| CYB5R3   | 62.55642274 | 3.054456131  | 0.330383138 | 9.245193789  | 2.35E-20 | 2.40E-18 |
| GPR64    | 85.22371964 | 1.73204785   | 0.187551456 | 9.235054138  | 2.58E-20 | 2.63E-18 |
| TMEM170I | 370.4415151 | -0.924537806 | 0.10032575  | -9.215359008 | 3.10E-20 | 3.14E-18 |
| TNIK     | 781.4658026 | 0.805490235  | 0.087481989 | 9.207497943  | 3.34E-20 | 3.36E-18 |
| P2RX1    | 120.7106185 | -1.221481918 | 0.132689446 | -9.205569492 | 3.40E-20 | 3.40E-18 |
| APOO     | 275.6431047 | 1.333847343  | 0.144983465 | 9.199996298  | 3.58E-20 | 3.57E-18 |
| PSMB9    | 1580.897336 | 1.215948177  | 0.132192997 | 9.198279792  | 3.64E-20 | 3.61E-18 |
| DCUN1D3  | 270.4202723 | 1.301304929  | 0.141573843 | 9.191704506  | 3.87E-20 | 3.81E-18 |
| MFNG     | 619.1876293 | -0.614022993 | 0.067058984 | -9.156461389 | 5.36E-20 | 5.26E-18 |
| PFKFB2   | 236.098616  | -0.886916757 | 0.097101502 | -9.133913912 | 6.61E-20 | 6.41E-18 |

|          |             |              |             |              |          |          |
|----------|-------------|--------------|-------------|--------------|----------|----------|
| STX11    | 1503.485603 | 0.61961006   | 0.067836535 | 9.13386953   | 6.61E-20 | 6.41E-18 |
| CD4      | 2239.159719 | -0.842544504 | 0.092306502 | -9.127683199 | 7.00E-20 | 6.76E-18 |
| MPEG1    | 562.356056  | -1.477920534 | 0.162104392 | -9.117091245 | 7.72E-20 | 7.41E-18 |
| TCF7L2   | 603.7321274 | 0.687765664  | 0.075493285 | 9.110289326  | 8.22E-20 | 7.85E-18 |
| MSC      | 634.2937579 | 1.709901897  | 0.187848383 | 9.102563809  | 8.82E-20 | 8.39E-18 |
| AGRN     | 449.2613138 | 1.109486389  | 0.12194183  | 9.098488906  | 9.16E-20 | 8.66E-18 |
| HS3ST2   | 94.64166158 | -2.122827938 | 0.233437963 | -9.09375628  | 9.57E-20 | 9.00E-18 |
| COLEC12  | 844.5403452 | -1.194193125 | 0.131695921 | -9.067806504 | 1.21E-19 | 1.14E-17 |
| PSTPIP2  | 413.3866766 | 1.893455836  | 0.209091753 | 9.055621796  | 1.36E-19 | 1.27E-17 |
| ADORA3   | 16.63671804 | -3.352797455 | 0.37052906  | -9.048676111 | 1.45E-19 | 1.34E-17 |
| PNPT1    | 589.2981175 | 1.117686744  | 0.12352305  | 9.048406271  | 1.45E-19 | 1.34E-17 |
| INSIG1   | 373.8138838 | 1.451076872  | 0.160433469 | 9.044726632  | 1.50E-19 | 1.38E-17 |
| GAL3ST4  | 20.767042   | -3.523592909 | 0.390296939 | -9.02797988  | 1.75E-19 | 1.60E-17 |
| NRIP3    | 474.5866322 | 0.96628248   | 0.107071383 | 9.024656742  | 1.80E-19 | 1.64E-17 |
| KCNJ5    | 304.0937203 | -1.690605899 | 0.18766796  | -9.008495097 | 2.09E-19 | 1.89E-17 |
| FAM124A  | 61.02931046 | 2.544006298  | 0.282599743 | 9.002153607  | 2.21E-19 | 1.99E-17 |
| WDR91    | 317.098171  | -0.969455757 | 0.107782545 | -8.994552477 | 2.37E-19 | 2.12E-17 |
| NAMPT    | 5264.134648 | 0.815890208  | 0.090810116 | 8.98457404   | 2.60E-19 | 2.32E-17 |
| CCL8     | 103.5277561 | 4.972640343  | 0.554434811 | 8.968845823  | 3.00E-19 | 2.65E-17 |
| KIAA0040 | 98.25097545 | 0.962288547  | 0.107288841 | 8.969139154  | 2.99E-19 | 2.65E-17 |
| LAMP3    | 85.56816281 | 1.609957745  | 0.179555569 | 8.966348158  | 3.07E-19 | 2.68E-17 |
| RASGRP1  | 131.313989  | 2.132753801  | 0.237855618 | 8.966589967  | 3.06E-19 | 2.68E-17 |
| FBXO6    | 266.3884974 | 1.33495742   | 0.148910428 | 8.964835025  | 3.11E-19 | 2.71E-17 |
| TFPI2    | 18.90549937 | 2.915596308  | 0.325395268 | 8.960168135  | 3.24E-19 | 2.81E-17 |
| PDGFR    | 10.56282793 | 5.337547437  | 0.595856953 | 8.957766468  | 3.31E-19 | 2.86E-17 |
| TSPAN15  | 315.3515831 | -0.878407429 | 0.098075059 | -8.956481257 | 3.35E-19 | 2.88E-17 |
| CD80     | 444.4172936 | 1.223953982  | 0.137014402 | 8.933031589  | 4.14E-19 | 3.54E-17 |
| CYP51A1  | 983.4369427 | 0.851592091  | 0.095351606 | 8.931072369  | 4.22E-19 | 3.59E-17 |
| LY6E     | 2095.277651 | 1.363195395  | 0.152668608 | 8.929113943  | 4.29E-19 | 3.64E-17 |
| LAMB3    | 66.85049286 | 2.401717925  | 0.269508413 | 8.911476632  | 5.04E-19 | 4.25E-17 |
| KCNN4    | 1090.463272 | 1.359193612  | 0.152566857 | 8.908839313  | 5.16E-19 | 4.31E-17 |
| STARD4   | 131.9760651 | 1.030361743  | 0.115649983 | 8.909311666  | 5.14E-19 | 4.31E-17 |
| ECE1     | 191.1033255 | 1.475167059  | 0.165647801 | 8.905443048  | 5.32E-19 | 4.42E-17 |
| ACSF2    | 475.6836662 | -0.542980904 | 0.061119087 | -8.883982605 | 6.45E-19 | 5.34E-17 |
| OSM      | 725.8336165 | 2.765222952  | 0.311512078 | 8.876776057  | 6.88E-19 | 5.67E-17 |
| EHD1     | 1019.311678 | 1.060850011  | 0.119531092 | 8.875096807  | 6.99E-19 | 5.74E-17 |
| FARP1    | 688.5509539 | -0.678542962 | 0.076481955 | -8.871935369 | 7.19E-19 | 5.85E-17 |
| METTL7A  | 178.2417263 | -1.439698295 | 0.162271328 | -8.872166852 | 7.17E-19 | 5.85E-17 |
| SEPP1    | 40.49693107 | -2.315130901 | 0.261346178 | -8.858483861 | 8.11E-19 | 6.57E-17 |
| MMP9     | 11505.70524 | 1.161600084  | 0.131152193 | 8.856886455  | 8.23E-19 | 6.64E-17 |
| KIF1B    | 528.5765929 | 0.545181058  | 0.061586313 | 8.852308743  | 8.57E-19 | 6.89E-17 |
| GAPT     | 14.50557126 | -3.303389782 | 0.373404666 | -8.846675161 | 9.02E-19 | 7.21E-17 |
| TNFRSF4  | 46.67747045 | 3.847062578  | 0.435469699 | 8.834283047  | 1.01E-18 | 8.02E-17 |
| MASTL    | 181.091577  | 0.774193856  | 0.087669897 | 8.830783266  | 1.04E-18 | 8.24E-17 |
| PRADC1   | 131.4385882 | -0.823663208 | 0.093414225 | -8.817320984 | 1.17E-18 | 9.26E-17 |
| RAB42    | 748.2076811 | -0.986282145 | 0.111892615 | -8.814541938 | 1.20E-18 | 9.45E-17 |
| B3GNT5   | 344.8983026 | 0.860481913  | 0.097685719 | 8.808676638  | 1.27E-18 | 9.91E-17 |
| ZNF589   | 814.8007175 | -0.657567896 | 0.074869444 | -8.782860632 | 1.59E-18 | 1.24E-16 |
| LY86     | 1875.032878 | -1.158530865 | 0.132118913 | -8.768849496 | 1.81E-18 | 1.40E-16 |

|           |             |              |             |              |          |          |
|-----------|-------------|--------------|-------------|--------------|----------|----------|
| DOCK4     | 712.8202955 | 0.923757923  | 0.105493315 | 8.756554116  | 2.01E-18 | 1.56E-16 |
| CISH      | 366.454313  | 1.100971352  | 0.126090883 | 8.731569838  | 2.51E-18 | 1.93E-16 |
| TJP1      | 145.3272481 | 1.010349325  | 0.115962901 | 8.71269448   | 2.97E-18 | 2.28E-16 |
| BAALC     | 44.00290595 | 2.908335927  | 0.333940468 | 8.709144896  | 3.06E-18 | 2.34E-16 |
| AQP3      | 269.7831115 | 1.398723197  | 0.16073502  | 8.702043898  | 3.26E-18 | 2.47E-16 |
| CCL17     | 19.84119682 | 3.888905295  | 0.446888829 | 8.702176118  | 3.26E-18 | 2.47E-16 |
| APOL3     | 774.8365656 | 1.388425509  | 0.159723485 | 8.692682285  | 3.54E-18 | 2.67E-16 |
| SPHK1     | 658.4874829 | 1.399917452  | 0.161089513 | 8.69030782   | 3.61E-18 | 2.72E-16 |
| CSRN1     | 96.89764371 | 1.173332632  | 0.135223254 | 8.677003371  | 4.06E-18 | 3.03E-16 |
| ZSWIM4    | 172.5561241 | 1.736211462  | 0.200087451 | 8.677263148  | 4.05E-18 | 3.03E-16 |
| IL32      | 1694.010733 | 1.721940377  | 0.198544139 | 8.672834102  | 4.21E-18 | 3.13E-16 |
| TRPC6     | 77.18083208 | -2.307773378 | 0.266937319 | -8.645375588 | 5.36E-18 | 3.97E-16 |
| TLR2      | 364.5610856 | 1.222526906  | 0.141545282 | 8.637002172  | 5.77E-18 | 4.25E-16 |
| APOBEC3G  | 328.5165165 | 0.775610941  | 0.08981354  | 8.635790832  | 5.83E-18 | 4.28E-16 |
| JAK3      | 87.74929099 | 1.760989987  | 0.204035468 | 8.630803263  | 6.09E-18 | 4.45E-16 |
| LOC72843: | 110.6166401 | 1.477386648  | 0.171353686 | 8.621855102  | 6.59E-18 | 4.80E-16 |
| TPCN1     | 230.938819  | -1.223975449 | 0.141978989 | -8.620820986 | 6.65E-18 | 4.82E-16 |
| IGFBP6    | 187.7593348 | 1.203985452  | 0.139702664 | 8.618199644  | 6.80E-18 | 4.91E-16 |
| LGALS17A  | 8.380183364 | 4.729362036  | 0.549121535 | 8.612596188  | 7.14E-18 | 5.14E-16 |
| APBA1     | 112.3390499 | -1.176644159 | 0.13663972  | -8.611289326 | 7.22E-18 | 5.16E-16 |
| PELI3     | 309.39599   | -0.725208455 | 0.084212212 | -8.611678016 | 7.20E-18 | 5.16E-16 |
| PNPLA3    | 499.6667876 | -1.300478136 | 0.151223148 | -8.599729303 | 7.99E-18 | 5.68E-16 |
| H3F3B     | 6636.597366 | 0.520597154  | 0.060699797 | 8.576588096  | 9.77E-18 | 6.92E-16 |
| CMBL      | 62.47288303 | -1.905009958 | 0.222161103 | -8.574903223 | 9.92E-18 | 7.00E-16 |
| PDGFC     | 306.5644927 | -0.793809985 | 0.092626216 | -8.570035783 | 1.03E-17 | 7.25E-16 |
| SERPIN2   | 82.61501584 | 3.46239586   | 0.404017302 | 8.569919769  | 1.04E-17 | 7.25E-16 |
| RELB      | 859.4049109 | 0.885592818  | 0.103394128 | 8.565213853  | 1.08E-17 | 7.53E-16 |
| GALM      | 279.6623032 | -0.972445092 | 0.113600842 | -8.560192676 | 1.13E-17 | 7.83E-16 |
| IL2RA     | 86.42973264 | 4.266527463  | 0.498466303 | 8.559309708  | 1.14E-17 | 7.87E-16 |
| APP       | 589.3496111 | 0.792636617  | 0.09267272  | 8.553073804  | 1.20E-17 | 8.27E-16 |
| GPC4      | 2545.187034 | 1.015371416  | 0.118787127 | 8.547823648  | 1.25E-17 | 8.62E-16 |
| DOK2      | 1449.942469 | -0.947446658 | 0.111015741 | -8.534345211 | 1.41E-17 | 9.66E-16 |
| ABHD12    | 2135.517782 | -0.543945692 | 0.063741749 | -8.533585868 | 1.42E-17 | 9.68E-16 |
| TBC1D9    | 2016.278936 | 0.704597018  | 0.0825738   | 8.532936766  | 1.43E-17 | 9.70E-16 |
| RBP1      | 482.5702505 | -1.244710705 | 0.14635154  | -8.504937525 | 1.82E-17 | 1.23E-15 |
| GAS7      | 797.2809132 | -0.705944232 | 0.083036421 | -8.501621565 | 1.87E-17 | 1.26E-15 |
| RPL10A    | 2936.084275 | -0.541272399 | 0.063725239 | -8.493846541 | 2.00E-17 | 1.34E-15 |
| RNF144B   | 274.8177174 | 0.931884983  | 0.109775097 | 8.489038147  | 2.08E-17 | 1.40E-15 |
| DOCK2     | 1963.550585 | -0.647377802 | 0.076328953 | -8.481418634 | 2.22E-17 | 1.49E-15 |
| MICALL2   | 53.82000001 | 1.136134437  | 0.133994728 | 8.478948805  | 2.27E-17 | 1.51E-15 |
| PTGES     | 742.9270412 | 3.03736528   | 0.359151431 | 8.457060217  | 2.74E-17 | 1.82E-15 |
| PLA2G15   | 742.7427184 | -0.759680015 | 0.08990435  | -8.449869376 | 2.92E-17 | 1.93E-15 |
| DSP       | 165.6858491 | 1.404670883  | 0.166337464 | 8.44470542   | 3.05E-17 | 2.01E-15 |
| SQRDL     | 1462.896018 | 0.60163803   | 0.071260215 | 8.442832143  | 3.10E-17 | 2.03E-15 |
| SP100     | 645.8188792 | 0.532029611  | 0.063050345 | 8.438171234  | 3.22E-17 | 2.11E-15 |
| PPTC7     | 1029.672582 | 0.448746111  | 0.053205966 | 8.434131383  | 3.34E-17 | 2.17E-15 |
| ITGB3     | 348.4412915 | 1.423280382  | 0.16878269  | 8.432620538  | 3.38E-17 | 2.19E-15 |
| DIRAS2    | 23.53047132 | 3.371928371  | 0.400409828 | 8.421192828  | 3.73E-17 | 2.41E-15 |
| RIPK2     | 1046.247793 | 0.924869     | 0.109940231 | 8.412470978  | 4.01E-17 | 2.59E-15 |

|           |             |              |             |              |          |          |
|-----------|-------------|--------------|-------------|--------------|----------|----------|
| SLC2A1    | 193.3175255 | 1.004033829  | 0.119456973 | 8.40498304   | 4.28E-17 | 2.75E-15 |
| ARHGAP9   | 395.5879922 | -0.881876941 | 0.104942403 | -8.403437649 | 4.34E-17 | 2.78E-15 |
| TM4SF1    | 102.5393713 | 2.953769062  | 0.351890116 | 8.394009748  | 4.70E-17 | 3.00E-15 |
| CCR7      | 110.8671194 | 2.132408069  | 0.254062997 | 8.393225672  | 4.73E-17 | 3.01E-15 |
| GEM       | 222.7619689 | 1.585238159  | 0.189602891 | 8.360833256  | 6.23E-17 | 3.95E-15 |
| MT1M      | 138.2959652 | 4.234603456  | 0.506519478 | 8.360198649  | 6.26E-17 | 3.96E-15 |
| IRF1      | 1229.424729 | 1.08288319   | 0.129679308 | 8.350470168  | 6.80E-17 | 4.27E-15 |
| RHOF      | 313.6453943 | 0.962017635  | 0.11520059  | 8.350804734  | 6.78E-17 | 4.27E-15 |
| RHOD      | 51.89880749 | 2.231342069  | 0.268428676 | 8.312606903  | 9.36E-17 | 5.85E-15 |
| PDE4B     | 611.618811  | 1.252764899  | 0.150840572 | 8.305225075  | 9.96E-17 | 6.21E-15 |
| CSF1      | 8399.358594 | 1.511641271  | 0.182201955 | 8.296515114  | 1.07E-16 | 6.66E-15 |
| ARHGEF5   | 462.2414906 | 1.038765121  | 0.12524074  | 8.294147095  | 1.09E-16 | 6.77E-15 |
| FUCA1     | 3002.094675 | -2.038273486 | 0.245974719 | -8.286516172 | 1.17E-16 | 7.20E-15 |
| MERTK     | 55.55372553 | -1.834835888 | 0.221702273 | -8.276125722 | 1.27E-16 | 7.83E-15 |
| CSF2RB    | 1606.772118 | 0.746239     | 0.090210084 | 8.272234851  | 1.31E-16 | 8.06E-15 |
| OTUD4     | 529.4487694 | 0.514036834  | 0.062236278 | 8.259440503  | 1.46E-16 | 8.94E-15 |
| SOCS3     | 71.30916938 | 1.448044037  | 0.175328097 | 8.259052956  | 1.47E-16 | 8.94E-15 |
| EEPD1     | 191.7539117 | -1.054881417 | 0.127785575 | -8.255089945 | 1.52E-16 | 9.21E-15 |
| LOC283070 | 211.6667833 | -0.739587748 | 0.089653036 | -8.249444516 | 1.59E-16 | 9.63E-15 |
| MAFB      | 1043.106435 | -0.940612932 | 0.114044267 | -8.247787976 | 1.61E-16 | 9.73E-15 |
| CFLAR     | 1670.983479 | 0.523654307  | 0.063706584 | 8.219783131  | 2.04E-16 | 1.23E-14 |
| OAS2      | 1390.549315 | 1.941517078  | 0.236531068 | 8.20829625   | 2.24E-16 | 1.34E-14 |
| SLC2A3    | 784.1900698 | 0.905653216  | 0.110439998 | 8.200409542  | 2.40E-16 | 1.43E-14 |
| GCHFR     | 307.9448311 | -1.14576068  | 0.139752266 | -8.198512353 | 2.43E-16 | 1.45E-14 |
| TDRD7     | 205.287478  | 0.720743476  | 0.087995124 | 8.19072058   | 2.60E-16 | 1.54E-14 |
| COTL1     | 5048.880368 | -0.636609081 | 0.077750291 | -8.187867554 | 2.66E-16 | 1.57E-14 |
| LOC100506 | 178.6749475 | 1.548697056  | 0.189365772 | 8.178336761  | 2.88E-16 | 1.70E-14 |
| PIK3AP1   | 5572.891108 | 0.5646967    | 0.06919891  | 8.160485511  | 3.34E-16 | 1.96E-14 |
| RCS1      | 290.1383206 | -1.329621089 | 0.162981273 | -8.158121877 | 3.40E-16 | 1.99E-14 |
| GMPT7     | 213.9546611 | 1.243708229  | 0.152495185 | 8.155721289  | 3.47E-16 | 2.03E-14 |
| VDR       | 789.6069129 | 1.17563248   | 0.144197696 | 8.152921397  | 3.55E-16 | 2.07E-14 |
| TMEM171   | 17.61505602 | 4.155907564  | 0.509841803 | 8.15136683   | 3.60E-16 | 2.09E-14 |
| JAK2      | 295.0367211 | 0.669873985  | 0.082491619 | 8.120509617  | 4.64E-16 | 2.69E-14 |
| HS3ST3A1  | 22.17396156 | 3.524896679  | 0.434318769 | 8.115920679  | 4.82E-16 | 2.78E-14 |
| IL1B      | 3090.432093 | 1.834800433  | 0.22616051  | 8.112824082  | 4.95E-16 | 2.84E-14 |
| DPEP2     | 719.7524396 | -1.071092715 | 0.132033378 | -8.112287419 | 4.97E-16 | 2.85E-14 |
| MS4A6A    | 212.9299531 | -2.294921327 | 0.282949601 | -8.110707064 | 5.03E-16 | 2.88E-14 |
| ABI3BP    | 8.984551896 | 3.275061154  | 0.403903696 | 8.1085199    | 5.12E-16 | 2.92E-14 |
| CD44      | 312.2080057 | 0.973343536  | 0.120056871 | 8.107353855  | 5.17E-16 | 2.94E-14 |
| LRRFIP2   | 1016.38479  | 0.497137856  | 0.061327937 | 8.1062217    | 5.22E-16 | 2.96E-14 |
| MARCKS    | 182.9814838 | 1.68779094   | 0.208249335 | 8.104664247  | 5.29E-16 | 2.99E-14 |
| FAM53B    | 271.1031988 | -0.537494352 | 0.06634064  | -8.10203754  | 5.40E-16 | 3.04E-14 |
| GPD2      | 1548.29429  | 0.741889071  | 0.091694553 | 8.090873988  | 5.92E-16 | 3.32E-14 |
| PAK1      | 590.4686309 | -0.617481867 | 0.076328783 | -8.089764329 | 5.98E-16 | 3.35E-14 |
| GBP2      | 3679.054436 | 1.021419737  | 0.126405412 | 8.08050635   | 6.45E-16 | 3.60E-14 |
| ITGB8     | 2344.678909 | 1.825665552  | 0.225980776 | 8.078853362  | 6.54E-16 | 3.63E-14 |
| SLC30A1   | 1975.58986  | 0.565126466  | 0.069948184 | 8.079215743  | 6.52E-16 | 3.63E-14 |
| LOC728370 | 110.401125  | 1.254589106  | 0.155383861 | 8.074127489  | 6.80E-16 | 3.76E-14 |
| METTL1    | 367.8167891 | 0.810480306  | 0.100468756 | 8.066988564  | 7.21E-16 | 3.97E-14 |

|          |             |              |             |              |          |          |
|----------|-------------|--------------|-------------|--------------|----------|----------|
| TRANK1   | 172.7142577 | 0.707252043  | 0.087728361 | 8.061840379  | 7.52E-16 | 4.13E-14 |
| GFPT2    | 10.50508586 | 2.242623631  | 0.278609702 | 8.0493379    | 8.32E-16 | 4.55E-14 |
| SNTA1    | 121.1102738 | -0.947637611 | 0.11772593  | -8.049523253 | 8.31E-16 | 4.55E-14 |
| CRIM1    | 2516.885461 | 0.882335413  | 0.109723568 | 8.04143934   | 8.88E-16 | 4.84E-14 |
| ETS2     | 870.4990688 | 0.89687491   | 0.111610232 | 8.035776761  | 9.30E-16 | 5.05E-14 |
| PGPEP1   | 681.4253326 | -0.494396177 | 0.061661306 | -8.017932252 | 1.08E-15 | 5.83E-14 |
| CH25H    | 21.46641784 | 1.5549856    | 0.193947436 | 8.017562019  | 1.08E-15 | 5.83E-14 |
| SLC7A8   | 1301.696992 | 1.078841824  | 0.134726661 | 8.007634237  | 1.17E-15 | 6.30E-14 |
| FRY      | 183.2815482 | -0.873968187 | 0.1091611   | -8.006223721 | 1.18E-15 | 6.35E-14 |
| SLC2A6   | 1473.187914 | 1.079225572  | 0.134807977 | 8.005650666  | 1.19E-15 | 6.36E-14 |
| KLF9     | 282.7754962 | 0.944933168  | 0.118219467 | 7.993042015  | 1.32E-15 | 7.03E-14 |
| HIST1H4E | 735.3410197 | -0.922806199 | 0.115467253 | -7.991929954 | 1.33E-15 | 7.07E-14 |
| MFAP5    | 96.15165219 | -1.342722318 | 0.168104087 | -7.987446012 | 1.38E-15 | 7.31E-14 |
| HES4     | 12.89207466 | 3.047156509  | 0.382406334 | 7.968373526  | 1.61E-15 | 8.51E-14 |
| HS3ST3B1 | 30.24131316 | 2.874346057  | 0.361130708 | 7.959295609  | 1.73E-15 | 9.13E-14 |
| RPL23    | 7334.917665 | -0.608558878 | 0.076470777 | -7.958058031 | 1.75E-15 | 9.20E-14 |
| SH3BP5   | 1675.131529 | 0.800231068  | 0.100676311 | 7.948553777  | 1.89E-15 | 9.90E-14 |
| GAL      | 188.4300787 | 1.244185348  | 0.156640076 | 7.94295676   | 1.97E-15 | 1.03E-13 |
| RICTOR   | 295.678447  | 0.541891996  | 0.068220077 | 7.943292057  | 1.97E-15 | 1.03E-13 |
| KDM2B    | 234.7311019 | -0.620082521 | 0.078157505 | -7.933755302 | 2.13E-15 | 1.11E-13 |
| CYBRD1   | 110.0477409 | -0.893832943 | 0.112745147 | -7.92790611  | 2.23E-15 | 1.16E-13 |
| CREBL2   | 1835.15249  | -0.545637154 | 0.068887298 | -7.920722282 | 2.36E-15 | 1.22E-13 |
| LILRA5   | 170.4409979 | -1.466038399 | 0.185144478 | -7.918347954 | 2.41E-15 | 1.24E-13 |
| B4GALT1  | 2237.145451 | 1.041618518  | 0.131851334 | 7.899946761  | 2.79E-15 | 1.44E-13 |
| DEFB1    | 93.00115669 | 2.04970503   | 0.26025836  | 7.875654908  | 3.39E-15 | 1.74E-13 |
| KCNAB1   | 414.2832614 | -1.267442002 | 0.160988687 | -7.872863786 | 3.47E-15 | 1.77E-13 |
| NBN      | 963.0515701 | 1.092551307  | 0.138775934 | 7.872772115  | 3.47E-15 | 1.77E-13 |
| NCS1     | 1117.074122 | 1.076082291  | 0.136850549 | 7.863193116  | 3.74E-15 | 1.91E-13 |
| DYNLT1   | 1081.052856 | 0.789995388  | 0.100595258 | 7.853207023  | 4.06E-15 | 2.06E-13 |
| TAGAP    | 452.5476629 | 1.012066258  | 0.128874749 | 7.853099712  | 4.06E-15 | 2.06E-13 |
| ACSL5    | 1201.996959 | 0.754777855  | 0.096119903 | 7.852461699  | 4.08E-15 | 2.06E-13 |
| FADS3    | 276.26096   | 1.010621188  | 0.12870218  | 7.852401493  | 4.08E-15 | 2.06E-13 |
| CKB      | 104.8980404 | 1.635828984  | 0.208522503 | 7.844855879  | 4.33E-15 | 2.18E-13 |
| PPP1R15B | 804.8212162 | 0.529203164  | 0.067510293 | 7.838851509  | 4.55E-15 | 2.28E-13 |
| PNPLA1   | 27.68644537 | 3.469732976  | 0.442793401 | 7.836008781  | 4.65E-15 | 2.32E-13 |
| SNAI2    | 18.17638385 | -2.728703248 | 0.348842116 | -7.822172613 | 5.19E-15 | 2.59E-13 |
| ZC3H12C  | 257.5807517 | 0.93577995   | 0.11967287  | 7.819482815  | 5.30E-15 | 2.64E-13 |
| CXCL5    | 5778.527352 | 1.648223784  | 0.210801924 | 7.818827023  | 5.33E-15 | 2.64E-13 |
| SOWAHD   | 220.433638  | -0.788866259 | 0.1008984   | -7.818421919 | 5.35E-15 | 2.64E-13 |
| ZBP1     | 30.64115028 | 2.368604068  | 0.303395845 | 7.806975971  | 5.86E-15 | 2.89E-13 |
| F3       | 217.4193051 | 1.490019148  | 0.190917885 | 7.804502682  | 5.97E-15 | 2.94E-13 |
| ZBTB4    | 1159.150176 | -0.575674575 | 0.073767235 | -7.803933171 | 6.00E-15 | 2.94E-13 |
| SLAMF8   | 5007.316661 | 0.501039947  | 0.064221123 | 7.801793655  | 6.10E-15 | 2.99E-13 |
| APOBEC3A | 50.66998298 | 3.122728941  | 0.400543769 | 7.796223989  | 6.38E-15 | 3.11E-13 |
| ADAMTS15 | 69.77860357 | -1.778847406 | 0.228204061 | -7.794985772 | 6.44E-15 | 3.13E-13 |
| EREG     | 100.8094775 | 2.549051021  | 0.327046842 | 7.794146567  | 6.48E-15 | 3.15E-13 |
| UBE2L6   | 1162.099809 | 0.84697905   | 0.108682183 | 7.793172946  | 6.53E-15 | 3.16E-13 |
| TBX21    | 77.6287017  | 1.336561622  | 0.171619007 | 7.787958026  | 6.81E-15 | 3.29E-13 |
| ACSL4    | 2042.423169 | 0.508842777  | 0.065375845 | 7.783345289  | 7.06E-15 | 3.40E-13 |

|         |             |              |             |              |          |          |
|---------|-------------|--------------|-------------|--------------|----------|----------|
| PLEK    | 2932.749915 | 0.771661298  | 0.099274058 | 7.773040757  | 7.66E-15 | 3.68E-13 |
| RASGRP4 | 121.2621953 | -1.261556199 | 0.162957225 | -7.741640171 | 9.81E-15 | 4.70E-13 |
| OR2A7   | 89.97514511 | 1.046409875  | 0.135234315 | 7.737754099  | 1.01E-14 | 4.83E-13 |
| ECSCR   | 18.76961013 | 3.353105117  | 0.433932165 | 7.727256433  | 1.10E-14 | 5.24E-13 |
| LRRC25  | 1216.391862 | -0.856204413 | 0.110886784 | -7.721428876 | 1.15E-14 | 5.47E-13 |
| NINJ2   | 194.8966116 | -1.105338442 | 0.143220961 | -7.717714173 | 1.18E-14 | 5.62E-13 |
| MAP7    | 498.5996862 | 0.946842711  | 0.122809589 | 7.709843498  | 1.26E-14 | 5.96E-13 |
| IFIH1   | 661.2281369 | 1.39153719   | 0.180932112 | 7.690935412  | 1.46E-14 | 6.89E-13 |
| WHAMMP  | 1045.249358 | -0.660021713 | 0.085852402 | -7.687865426 | 1.50E-14 | 7.04E-13 |
| STAP2   | 68.41349214 | 1.516084625  | 0.197393141 | 7.680533458  | 1.58E-14 | 7.44E-13 |
| MAML3   | 19.27124599 | -2.318318733 | 0.301879853 | -7.679607331 | 1.60E-14 | 7.47E-13 |
| TRHDE   | 111.1440934 | -1.173643798 | 0.15283389  | -7.679211702 | 1.60E-14 | 7.48E-13 |
| CYP3A7  | 16.67069487 | 5.229068392  | 0.681060471 | 7.67783275   | 1.62E-14 | 7.54E-13 |
| NUMB    | 4003.267552 | 0.568657224  | 0.074136464 | 7.670411994  | 1.71E-14 | 7.97E-13 |
| CECR1   | 6198.500287 | -0.842032658 | 0.109829922 | -7.666696319 | 1.76E-14 | 8.18E-13 |
| PARP10  | 815.849602  | 0.882677595  | 0.115200206 | 7.662118182  | 1.83E-14 | 8.46E-13 |
| DNASE2  | 2689.041771 | -0.509384662 | 0.066631628 | -7.644787839 | 2.09E-14 | 9.65E-13 |
| DDX60L  | 2263.417331 | 1.136983415  | 0.148759253 | 7.643110545  | 2.12E-14 | 9.76E-13 |
| USP12   | 764.2872825 | 0.667119861  | 0.087361    | 7.636357845  | 2.23E-14 | 1.03E-12 |
| MMP14   | 5914.251497 | 0.832412176  | 0.10915369  | 7.626056249  | 2.42E-14 | 1.11E-12 |
| HN1     | 1094.55085  | -0.664560519 | 0.087149987 | -7.625480395 | 2.43E-14 | 1.11E-12 |
| ME3     | 85.32598161 | -1.001601018 | 0.131370041 | -7.624272718 | 2.45E-14 | 1.12E-12 |
| GPR84   | 214.4750318 | 2.042238289  | 0.267914034 | 7.622737243  | 2.48E-14 | 1.13E-12 |
| CKAP4   | 265.6767271 | 1.127293775  | 0.147994213 | 7.617147682  | 2.59E-14 | 1.18E-12 |
| MXD4    | 431.8024954 | -0.819774337 | 0.107635488 | -7.616208661 | 2.61E-14 | 1.18E-12 |
| CADM1   | 203.2541146 | -1.276671636 | 0.167688484 | -7.613353073 | 2.67E-14 | 1.20E-12 |
| PNKD    | 908.9846027 | 0.901824365  | 0.11845406  | 7.613283718  | 2.67E-14 | 1.20E-12 |
| HK3     | 2763.652474 | 0.801870708  | 0.105331236 | 7.61284821   | 2.68E-14 | 1.20E-12 |
| CYP2U1  | 69.95292597 | -1.260153889 | 0.165547635 | -7.612031972 | 2.70E-14 | 1.21E-12 |
| IFI44   | 865.1960987 | 1.934623757  | 0.254645266 | 7.597328564  | 3.02E-14 | 1.35E-12 |
| SASH3   | 1189.119045 | -0.77761091  | 0.102618291 | -7.577702821 | 3.52E-14 | 1.57E-12 |
| BMP6    | 24.39980155 | 2.502209426  | 0.330221123 | 7.57737544   | 3.53E-14 | 1.57E-12 |
| EEF1B2  | 2309.364643 | -0.515131305 | 0.068141629 | -7.559715159 | 4.04E-14 | 1.79E-12 |
| AK8     | 92.22563718 | 0.995057436  | 0.131640529 | 7.558898817  | 4.06E-14 | 1.80E-12 |
| RPS3    | 5072.165844 | -0.478544325 | 0.063313313 | -7.558352267 | 4.08E-14 | 1.80E-12 |
| TLR8    | 732.5014515 | -0.698807439 | 0.092515427 | -7.553415275 | 4.24E-14 | 1.87E-12 |
| CLEC2D  | 122.6830888 | 1.129728741  | 0.149591651 | 7.552084168  | 4.28E-14 | 1.88E-12 |
| CARS2   | 1094.318905 | -0.389001373 | 0.051523687 | -7.549952203 | 4.35E-14 | 1.91E-12 |
| SNX10   | 1057.54569  | 1.519127009  | 0.201275788 | 7.547490066  | 4.44E-14 | 1.94E-12 |
| RPL30   | 6312.012858 | -0.430462882 | 0.057161927 | -7.530587337 | 5.05E-14 | 2.20E-12 |
| SRPX2   | 85.70387263 | 1.184286129  | 0.157377128 | 7.525147684  | 5.27E-14 | 2.29E-12 |
| CHST3   | 55.39688646 | 1.977184836  | 0.262820837 | 7.52293791   | 5.36E-14 | 2.33E-12 |
| IER3    | 981.029595  | 1.345491151  | 0.17892727  | 7.519765739  | 5.49E-14 | 2.38E-12 |
| ST5     | 60.27372252 | -1.400649985 | 0.186319901 | -7.51744704  | 5.59E-14 | 2.41E-12 |
| OVOL1   | 104.783451  | 1.819871726  | 0.242396491 | 7.507830332  | 6.01E-14 | 2.59E-12 |
| CHPT1   | 610.5521351 | -0.783064366 | 0.104351796 | -7.504081331 | 6.19E-14 | 2.66E-12 |
| NLRP12  | 19.97445398 | -1.235599506 | 0.164893126 | -7.493335435 | 6.71E-14 | 2.88E-12 |
| DESI1   | 536.8677275 | 0.644874579  | 0.086209818 | 7.480291655  | 7.42E-14 | 3.18E-12 |
| PLA1A   | 41.64300534 | 2.037134738  | 0.272568029 | 7.473857967  | 7.79E-14 | 3.33E-12 |

|           |             |              |             |              |          |          |
|-----------|-------------|--------------|-------------|--------------|----------|----------|
| SORD      | 167.3720392 | -0.621490118 | 0.083196083 | -7.470184795 | 8.01E-14 | 3.41E-12 |
| CYP3A5    | 34.15091915 | 3.41722773   | 0.457637528 | 7.467105568  | 8.20E-14 | 3.49E-12 |
| DNAJB5    | 160.8784881 | 1.035855653  | 0.138786166 | 7.463680861  | 8.41E-14 | 3.57E-12 |
| IL27      | 37.68209581 | 1.89462678   | 0.253860966 | 7.463245759  | 8.44E-14 | 3.58E-12 |
| PXN       | 646.4060262 | 1.324824743  | 0.17764694  | 7.457627731  | 8.81E-14 | 3.72E-12 |
| MSANTD3   | 554.9579933 | 1.131300556  | 0.151931818 | 7.44610687   | 9.61E-14 | 4.05E-12 |
| RASGRP2   | 117.3440212 | -1.088009921 | 0.146167061 | -7.44360538  | 9.80E-14 | 4.12E-12 |
| ZNF267    | 1371.363666 | 0.608469077  | 0.081967585 | 7.423289026  | 1.14E-13 | 4.79E-12 |
| SLC27A3   | 489.9267493 | 0.901158115  | 0.12142203  | 7.421701961  | 1.16E-13 | 4.84E-12 |
| MX2       | 426.9555556 | 1.805553895  | 0.243405664 | 7.417879547  | 1.19E-13 | 4.97E-12 |
| RPS18     | 1092.150846 | -0.448566872 | 0.060569336 | -7.405840976 | 1.30E-13 | 5.43E-12 |
| HSPA9     | 4024.355665 | 0.316449771  | 0.042739053 | 7.404229818  | 1.32E-13 | 5.49E-12 |
| EMR2      | 893.1922134 | 0.808327379  | 0.109185332 | 7.403259806  | 1.33E-13 | 5.51E-12 |
| PTGFRN    | 111.8095134 | -1.006223836 | 0.13619146  | -7.388303447 | 1.49E-13 | 6.16E-12 |
| RAB32     | 655.5510941 | -0.620272741 | 0.083975357 | -7.386366189 | 1.51E-13 | 6.23E-12 |
| GZMB      | 120.5470434 | 1.695959059  | 0.229621278 | 7.385896771  | 1.51E-13 | 6.24E-12 |
| SLED1     | 54.60054873 | 1.306050519  | 0.176853567 | 7.384926069  | 1.53E-13 | 6.27E-12 |
| ITGA5     | 3517.75822  | 1.070873876  | 0.145301519 | 7.370011552  | 1.71E-13 | 7.00E-12 |
| ZNF586    | 301.7032101 | 0.754674522  | 0.102451101 | 7.366192408  | 1.76E-13 | 7.19E-12 |
| TRPV4     | 268.0349381 | -0.710202633 | 0.096453752 | -7.363141594 | 1.80E-13 | 7.34E-12 |
| MGAT4A    | 715.7853945 | -0.66472231  | 0.090288323 | -7.36221796  | 1.81E-13 | 7.38E-12 |
| HIPK2     | 4944.374995 | -0.773243536 | 0.10527865  | -7.344732621 | 2.06E-13 | 8.39E-12 |
| ZNF503    | 29.6885835  | -1.646426888 | 0.224175256 | -7.344373861 | 2.07E-13 | 8.39E-12 |
| CHN2      | 150.1624242 | -0.632346055 | 0.086142839 | -7.340668858 | 2.13E-13 | 8.61E-12 |
| UBA7      | 837.8837334 | 0.5612939    | 0.076467818 | 7.340263084  | 2.13E-13 | 8.62E-12 |
| SUSD1     | 2719.908641 | -0.522693589 | 0.071306884 | -7.330198173 | 2.30E-13 | 9.27E-12 |
| NPC1      | 2248.826811 | 0.365822684  | 0.049934637 | 7.326030692  | 2.37E-13 | 9.54E-12 |
| PRKACB    | 583.1481043 | -0.645948652 | 0.088225055 | -7.321600969 | 2.45E-13 | 9.84E-12 |
| CD22      | 128.5596923 | -1.072079736 | 0.146453947 | -7.320251552 | 2.48E-13 | 9.92E-12 |
| MCOLN2    | 128.2694049 | 1.589128693  | 0.21714388  | 7.318321336  | 2.51E-13 | 1.00E-11 |
| C17orf96  | 29.96144087 | 2.053348157  | 0.280600519 | 7.317691948  | 2.52E-13 | 1.01E-11 |
| HIST1H2BK | 491.1586839 | 0.753449048  | 0.102985959 | 7.316036597  | 2.55E-13 | 1.02E-11 |
| TOR1B     | 973.7637487 | 0.91225714   | 0.124770649 | 7.311472293  | 2.64E-13 | 1.05E-11 |
| EIF3F     | 1516.519031 | -0.526154205 | 0.072069614 | -7.300638591 | 2.86E-13 | 1.14E-11 |
| CLEC6A    | 437.0628092 | 1.570172877  | 0.215213801 | 7.295874466  | 2.97E-13 | 1.17E-11 |
| RPL29     | 5205.60302  | -0.423984034 | 0.058190379 | -7.286153495 | 3.19E-13 | 1.26E-11 |
| ABHD6     | 657.8493772 | -0.523958179 | 0.071964803 | -7.280756116 | 3.32E-13 | 1.31E-11 |
| GPR65     | 287.2792798 | -1.03951383  | 0.142784068 | -7.280320847 | 3.33E-13 | 1.31E-11 |
| TRIM5     | 402.0230563 | 0.827060316  | 0.113677034 | 7.275526849  | 3.45E-13 | 1.35E-11 |
| IQSEC3    | 110.651359  | -1.439760434 | 0.197949441 | -7.273374597 | 3.51E-13 | 1.37E-11 |
| C7orf41   | 42.48511864 | -1.490266665 | 0.204931244 | -7.272032476 | 3.54E-13 | 1.38E-11 |
| NNMT      | 72.79388445 | 4.31577394   | 0.593919968 | 7.26659175   | 3.69E-13 | 1.44E-11 |
| EBI3      | 23.05978092 | 4.090451929  | 0.562969884 | 7.265845016  | 3.71E-13 | 1.44E-11 |
| NFKBIA    | 3008.739479 | 0.794269106  | 0.109320734 | 7.265493743  | 3.72E-13 | 1.44E-11 |
| BLVRB     | 2026.12202  | -0.583092115 | 0.080351346 | -7.256780959 | 3.96E-13 | 1.54E-11 |
| STBD1     | 50.2264039  | 1.000147431  | 0.137882905 | 7.253599961  | 4.06E-13 | 1.57E-11 |
| PSMA3     | 160.0515333 | 0.982295333  | 0.135560658 | 7.246168218  | 4.29E-13 | 1.65E-11 |
| SMPD2     | 236.9514466 | 0.642812535  | 0.088714729 | 7.245837793  | 4.30E-13 | 1.65E-11 |
| RPS12     | 4208.033635 | -0.521839397 | 0.072223593 | -7.22533144  | 5.00E-13 | 1.92E-11 |

|          |             |              |             |              |          |          |
|----------|-------------|--------------|-------------|--------------|----------|----------|
| C3orf37  | 257.701358  | 0.524102683  | 0.072603675 | 7.218679813  | 5.25E-13 | 2.01E-11 |
| ABI3     | 293.9688254 | -1.175982432 | 0.162990933 | -7.21501747  | 5.39E-13 | 2.06E-11 |
| CLEC4A   | 528.4290508 | -0.913370453 | 0.126692308 | -7.209359956 | 5.62E-13 | 2.15E-11 |
| C6orf106 | 1954.520108 | 0.377230792  | 0.05233528  | 7.207963552  | 5.68E-13 | 2.16E-11 |
| CLCF1    | 198.6046006 | 1.287497717  | 0.178624397 | 7.20784921   | 5.68E-13 | 2.16E-11 |
| EAH1     | 869.048365  | 0.680916679  | 0.09448008  | 7.206986695  | 5.72E-13 | 2.17E-11 |
| HSH2D    | 20.40601476 | 2.995827018  | 0.416223129 | 7.197646668  | 6.13E-13 | 2.32E-11 |
| HSD3B7   | 2514.021838 | 0.619102767  | 0.086064334 | 7.193488177  | 6.32E-13 | 2.39E-11 |
| PDK4     | 750.5002433 | -1.173572    | 0.163263107 | -7.188225333 | 6.56E-13 | 2.47E-11 |
| USF2     | 2862.601944 | -0.502569424 | 0.069913911 | -7.188403828 | 6.56E-13 | 2.47E-11 |
| ARAP3    | 109.9001256 | 1.132991555  | 0.157625168 | 7.187884837  | 6.58E-13 | 2.47E-11 |
| LIMK1    | 5156.516915 | 0.459693421  | 0.064008018 | 7.181810017  | 6.88E-13 | 2.58E-11 |
| MBNL1    | 376.4311701 | 0.495604675  | 0.069122334 | 7.169964429  | 7.50E-13 | 2.81E-11 |
| C15orf26 | 7.095787696 | 3.193945137  | 0.445555122 | 7.168462397  | 7.58E-13 | 2.83E-11 |
| RBP7     | 55.72009154 | -1.241189735 | 0.173628969 | -7.148517571 | 8.77E-13 | 3.27E-11 |
| SSTR2    | 7.252278054 | 3.063163528  | 0.429149401 | 7.137755575  | 9.49E-13 | 3.53E-11 |
| JHDM1D   | 144.4655126 | 0.679890594  | 0.095295623 | 7.134541689  | 9.71E-13 | 3.60E-11 |
| TIFA     | 222.2667583 | 1.047970644  | 0.146985592 | 7.129750811  | 1.01E-12 | 3.72E-11 |
| SLC25A25 | 170.0283974 | 0.637611733  | 0.089482066 | 7.125581227  | 1.04E-12 | 3.83E-11 |
| KRT23    | 33.59019243 | 3.886725295  | 0.546011413 | 7.118395703  | 1.09E-12 | 4.03E-11 |
| CCDC115  | 737.5561857 | 0.736606077  | 0.103564221 | 7.112553669  | 1.14E-12 | 4.19E-11 |
| SLC43A3  | 4002.779541 | 0.476702262  | 0.067021589 | 7.112667288  | 1.14E-12 | 4.19E-11 |
| RPL18A   | 4232.98397  | -0.396951039 | 0.055818348 | -7.111479579 | 1.15E-12 | 4.21E-11 |
| LDLRAP1  | 408.4673323 | 0.821080126  | 0.115705542 | 7.096290412  | 1.28E-12 | 4.69E-11 |
| NT5DC2   | 36.99995403 | -1.615691279 | 0.227947526 | -7.087996544 | 1.36E-12 | 4.97E-11 |
| TTC3     | 213.6097438 | -0.770935085 | 0.108805569 | -7.085437765 | 1.39E-12 | 5.05E-11 |
| C1RL     | 1017.409618 | 0.851848572  | 0.12034873  | 7.078168337  | 1.46E-12 | 5.32E-11 |
| RFTN1    | 367.3319212 | 0.922589959  | 0.130450869 | 7.072317482  | 1.52E-12 | 5.53E-11 |
| MSMO1    | 458.5295832 | 0.976842065  | 0.138130552 | 7.071875507  | 1.53E-12 | 5.54E-11 |
| RPS6     | 4434.007205 | -0.486226959 | 0.068894069 | -7.057602602 | 1.69E-12 | 6.13E-11 |
| MGC12916 | 50.28167004 | 2.189431746  | 0.310292517 | 7.056024963  | 1.71E-12 | 6.19E-11 |
| VWA8     | 717.6579118 | 1.261413849  | 0.178814742 | 7.054305665  | 1.73E-12 | 6.25E-11 |
| ANKRD22  | 91.94869677 | 2.398332121  | 0.340012845 | 7.053651525  | 1.74E-12 | 6.27E-11 |
| UBD      | 1234.500547 | 2.598764283  | 0.368437095 | 7.053481626  | 1.74E-12 | 6.27E-11 |
| GPR82    | 26.37675128 | -2.490046866 | 0.353251455 | -7.048935919 | 1.80E-12 | 6.46E-11 |
| NFE2L3   | 209.8749397 | 0.899625291  | 0.127661252 | 7.046972176  | 1.83E-12 | 6.54E-11 |
| OTUD7B   | 60.6401071  | 1.321600281  | 0.187602122 | 7.044697945  | 1.86E-12 | 6.63E-11 |
| RPLP0P2  | 31.07308323 | 1.767646677  | 0.251247642 | 7.035475674  | 1.99E-12 | 7.08E-11 |
| PPM1L    | 74.50698275 | -0.615340673 | 0.087551151 | -7.028356183 | 2.09E-12 | 7.43E-11 |
| MMP10    | 12.65992575 | 4.199542305  | 0.597924972 | 7.023527206  | 2.16E-12 | 7.68E-11 |
| CPVL     | 850.1631708 | -1.147193024 | 0.163537622 | -7.014856941 | 2.30E-12 | 8.15E-11 |
| MYO7A    | 25.33902646 | -1.5832114   | 0.225829285 | -7.010655871 | 2.37E-12 | 8.39E-11 |
| GAB3     | 163.8284018 | -0.650432066 | 0.092784064 | -7.010170037 | 2.38E-12 | 8.40E-11 |
| CST3     | 13442.50268 | -0.51010279  | 0.072809403 | -7.006001574 | 2.45E-12 | 8.64E-11 |
| SLC45A3  | 82.96204549 | -1.005094717 | 0.143476481 | -7.005292527 | 2.46E-12 | 8.67E-11 |
| PLAUR    | 12820.6138  | 0.806166844  | 0.115145856 | 7.001266647  | 2.54E-12 | 8.90E-11 |
| TRAFD1   | 862.9049422 | 0.49809127   | 0.071231703 | 6.992550375  | 2.70E-12 | 9.45E-11 |
| TCF7L1   | 14.06852983 | 1.964413432  | 0.280966631 | 6.991625398  | 2.72E-12 | 9.50E-11 |
| CXCR2    | 25.01367818 | -1.729780004 | 0.247471867 | -6.989804635 | 2.75E-12 | 9.61E-11 |

|           |             |              |             |              |          |          |
|-----------|-------------|--------------|-------------|--------------|----------|----------|
| SDC4      | 1254.788637 | 1.092522818  | 0.15642364  | 6.984384304  | 2.86E-12 | 9.97E-11 |
| PMAIP1    | 38.00075998 | 1.105443025  | 0.158283881 | 6.983926728  | 2.87E-12 | 9.98E-11 |
| LIF       | 61.21341281 | 2.422284076  | 0.347506035 | 6.970480592  | 3.16E-12 | 1.10E-10 |
| NOV       | 11.89700398 | -2.015675867 | 0.28939344  | -6.965174698 | 3.28E-12 | 1.14E-10 |
| PKD1L1    | 144.6514332 | 1.697488997  | 0.24375746  | 6.963844297  | 3.31E-12 | 1.14E-10 |
| ANKLE2    | 1191.122891 | 0.509734909  | 0.073200495 | 6.96354457   | 3.32E-12 | 1.15E-10 |
| HMG2P4    | 17.08614817 | 2.203993443  | 0.317348802 | 6.94501894   | 3.78E-12 | 1.30E-10 |
| CD69      | 70.96032989 | 1.497068146  | 0.215670021 | 6.941475404  | 3.88E-12 | 1.33E-10 |
| INPP5D    | 495.0884328 | -0.642564104 | 0.092592161 | -6.939724654 | 3.93E-12 | 1.35E-10 |
| PITPNB    | 947.1527773 | 0.327537908  | 0.047223937 | 6.935844971  | 4.04E-12 | 1.38E-10 |
| PTPRF     | 33.90826429 | 3.229351625  | 0.465683999 | 6.934641588  | 4.07E-12 | 1.39E-10 |
| NDP       | 9.206915458 | 4.287018497  | 0.618452272 | 6.931850189  | 4.15E-12 | 1.42E-10 |
| SCARF1    | 195.4889453 | 0.994914229  | 0.143703474 | 6.923383296  | 4.41E-12 | 1.50E-10 |
| SPATA7    | 56.17795838 | -1.142322421 | 0.165080714 | -6.919781201 | 4.52E-12 | 1.54E-10 |
| LYZ       | 63948.15382 | -0.51935031  | 0.075073822 | -6.917861632 | 4.59E-12 | 1.56E-10 |
| UXS1      | 954.905238  | 0.650060309  | 0.094047544 | 6.912039211  | 4.78E-12 | 1.62E-10 |
| LOC645638 | 90.45258929 | 1.410827628  | 0.204150651 | 6.910718239  | 4.82E-12 | 1.63E-10 |
| TNFSF12   | 1220.577172 | -0.618675666 | 0.089728806 | -6.89495039  | 5.39E-12 | 1.82E-10 |
| CLEC4E    | 1528.558242 | 1.41346579   | 0.205037084 | 6.893708016  | 5.44E-12 | 1.83E-10 |
| TRIM25    | 1168.433578 | 0.464299353  | 0.067456499 | 6.882944701  | 5.86E-12 | 1.97E-10 |
| ENTPD1    | 269.7721598 | 0.767987578  | 0.111666832 | 6.877490506  | 6.09E-12 | 2.05E-10 |
| ARL4C     | 30.64511163 | -1.781993373 | 0.259347904 | -6.871053684 | 6.37E-12 | 2.14E-10 |
| C15orf38  | 164.5234791 | -0.739642241 | 0.107708752 | -6.867057941 | 6.55E-12 | 2.19E-10 |
| PLEKHB1   | 71.33009722 | -1.144920745 | 0.166744821 | -6.866304697 | 6.59E-12 | 2.20E-10 |
| UNC5B     | 266.614222  | -0.705432031 | 0.102781325 | -6.863426094 | 6.72E-12 | 2.24E-10 |
| FURIN     | 1098.579198 | 0.444279043  | 0.064743271 | 6.862165514  | 6.78E-12 | 2.26E-10 |
| NFIA      | 156.6630887 | -0.901214111 | 0.131373408 | -6.859943168 | 6.89E-12 | 2.29E-10 |
| RPL7      | 6109.838027 | -0.544556627 | 0.079397084 | -6.858647701 | 6.95E-12 | 2.30E-10 |
| SCD       | 7689.667697 | -0.613812206 | 0.089492678 | -6.858798039 | 6.94E-12 | 2.30E-10 |
| ARHGAP15  | 242.6622434 | -0.585497145 | 0.085482335 | -6.849334913 | 7.42E-12 | 2.45E-10 |
| GTPBP2    | 815.3952998 | 0.608062361  | 0.088782383 | 6.848907833  | 7.44E-12 | 2.45E-10 |
| C19orf66  | 317.8150737 | 0.730335016  | 0.106848837 | 6.835217275  | 8.19E-12 | 2.69E-10 |
| MT1X      | 311.6162287 | 1.839265516  | 0.269086845 | 6.835211567  | 8.19E-12 | 2.69E-10 |
| BATF3     | 76.27889229 | 1.082844274  | 0.158613853 | 6.826921201  | 8.68E-12 | 2.85E-10 |
| EIF3L     | 2201.221816 | -0.507871711 | 0.074436257 | -6.822907675 | 8.92E-12 | 2.92E-10 |
| B4GALT5   | 1282.08585  | 0.625441793  | 0.091701681 | 6.820396136  | 9.08E-12 | 2.97E-10 |
| CLCN4     | 232.8695715 | -1.001836296 | 0.147031012 | -6.813775423 | 9.51E-12 | 3.10E-10 |
| CPT1B     | 105.7172089 | 0.824136794  | 0.121028385 | 6.809450474  | 9.80E-12 | 3.19E-10 |
| TTC39B    | 889.9048664 | 0.752716877  | 0.110562434 | 6.808070789  | 9.89E-12 | 3.22E-10 |
| YME1L1    | 902.0404469 | 0.389672194  | 0.057241165 | 6.80755179   | 9.93E-12 | 3.22E-10 |
| EPHX1     | 2283.138735 | -0.645376119 | 0.094837461 | -6.805075858 | 1.01E-11 | 3.27E-10 |
| BACE1     | 735.7236909 | -0.612250639 | 0.089975397 | -6.804645022 | 1.01E-11 | 3.28E-10 |
| TARS      | 1449.116436 | 0.417928178  | 0.061605145 | 6.78398172   | 1.17E-11 | 3.78E-10 |
| SLIT3     | 107.6773486 | -1.065378809 | 0.157066156 | -6.782994117 | 1.18E-11 | 3.79E-10 |
| NPL       | 2007.033077 | -0.77399851  | 0.114156772 | -6.780136641 | 1.20E-11 | 3.86E-10 |
| MMAA      | 171.441098  | 0.522305703  | 0.077243815 | 6.761780251  | 1.36E-11 | 4.38E-10 |
| TRPS1     | 161.8939875 | -0.730211376 | 0.107998802 | -6.761291455 | 1.37E-11 | 4.39E-10 |
| SIRPB1    | 374.7454758 | -0.637102076 | 0.09424189  | -6.760285467 | 1.38E-11 | 4.41E-10 |
| TENM4     | 17.96382265 | -2.454774172 | 0.363166244 | -6.759367679 | 1.39E-11 | 4.43E-10 |

|           |             |              |             |              |          |          |
|-----------|-------------|--------------|-------------|--------------|----------|----------|
| GBP3      | 487.6779749 | 0.811853446  | 0.120117628 | 6.758820134  | 1.39E-11 | 4.44E-10 |
| CTNNBIP1  | 189.373322  | -0.626003479 | 0.092639643 | -6.757403862 | 1.40E-11 | 4.47E-10 |
| CSF2      | 13.61409724 | 4.070729307  | 0.602517681 | 6.756198918  | 1.42E-11 | 4.50E-10 |
| NCAM1     | 34.23201797 | 1.14878247   | 0.170037736 | 6.756044255  | 1.42E-11 | 4.50E-10 |
| APOL6     | 805.1980349 | 0.766640757  | 0.113479498 | 6.755764433  | 1.42E-11 | 4.50E-10 |
| SYNJ2     | 117.3443131 | 1.093574764  | 0.161891524 | 6.754984678  | 1.43E-11 | 4.52E-10 |
| PARP12    | 987.5231715 | 0.776502101  | 0.114976242 | 6.75358741   | 1.44E-11 | 4.56E-10 |
| GREM1     | 111.1157034 | 1.110859821  | 0.164783391 | 6.74133365   | 1.57E-11 | 4.95E-10 |
| RPLP2     | 13642.31461 | -0.330378964 | 0.049023214 | -6.739235135 | 1.59E-11 | 5.01E-10 |
| EGR2      | 4152.824676 | 0.795738402  | 0.118130963 | 6.73606972   | 1.63E-11 | 5.11E-10 |
| CDR2      | 247.1198718 | -0.544112547 | 0.080839785 | -6.730751986 | 1.69E-11 | 5.29E-10 |
| ALAS1     | 2221.06813  | 0.923855799  | 0.1375867   | 6.714717307  | 1.88E-11 | 5.90E-10 |
| DEF6      | 148.7787664 | -1.029988248 | 0.153520573 | -6.709121977 | 1.96E-11 | 6.11E-10 |
| ZNF552    | 116.6361275 | -0.861429884 | 0.128393057 | -6.709318278 | 1.96E-11 | 6.11E-10 |
| METTL9    | 459.3085671 | 0.546271299  | 0.081499648 | 6.702744284  | 2.05E-11 | 6.37E-10 |
| SEPN1     | 1707.019853 | 0.609702359  | 0.091026406 | 6.698082327  | 2.11E-11 | 6.57E-10 |
| C10orf54  | 422.9957702 | -0.577479544 | 0.086272443 | -6.693673224 | 2.18E-11 | 6.76E-10 |
| PIM3      | 1649.745914 | 0.599019443  | 0.089526502 | 6.690973358  | 2.22E-11 | 6.87E-10 |
| LOC65443: | 578.7697077 | 0.450994862  | 0.067410975 | 6.690229055  | 2.23E-11 | 6.89E-10 |
| MMP19     | 1199.715853 | 0.861527411  | 0.128776795 | 6.690082736  | 2.23E-11 | 6.89E-10 |
| H2AFV     | 1381.289488 | -0.383135832 | 0.057355919 | -6.679970191 | 2.39E-11 | 7.37E-10 |
| APBB2     | 276.1251919 | 0.798343814  | 0.119621521 | 6.673914603  | 2.49E-11 | 7.67E-10 |
| USP30-AS1 | 148.9060556 | 1.047409023  | 0.157205797 | 6.662661577  | 2.69E-11 | 8.27E-10 |
| LGR4      | 44.89121729 | -0.993848448 | 0.149190756 | -6.661595372 | 2.71E-11 | 8.32E-10 |
| NFKB1     | 653.068121  | 0.610584477  | 0.091664592 | 6.661072316  | 2.72E-11 | 8.33E-10 |
| CXCL3     | 222.1366557 | 1.005544681  | 0.151001026 | 6.659191066  | 2.75E-11 | 8.42E-10 |
| CASP8     | 110.5419929 | -0.69740701  | 0.104767383 | -6.656718845 | 2.80E-11 | 8.55E-10 |
| RIN3      | 1499.76146  | -0.382947152 | 0.05756949  | -6.651911459 | 2.89E-11 | 8.82E-10 |
| RPL36A    | 1530.505101 | -0.612385826 | 0.092076007 | -6.650872991 | 2.91E-11 | 8.87E-10 |
| ATP1A1    | 15209.71044 | 0.449552405  | 0.067731735 | 6.637249193  | 3.20E-11 | 9.71E-10 |
| CUL1      | 817.5735053 | 0.447060142  | 0.06739998  | 6.632941784  | 3.29E-11 | 9.99E-10 |
| SLFN5     | 532.6365165 | 0.784092999  | 0.118257791 | 6.630370765  | 3.35E-11 | 1.01E-09 |
| WARS      | 12493.94636 | 0.912626844  | 0.137822359 | 6.621761899  | 3.55E-11 | 1.07E-09 |
| PVRL2     | 290.7172049 | 0.787647882  | 0.118987551 | 6.61958225   | 3.60E-11 | 1.09E-09 |
| TLR7      | 117.8677195 | -1.234409377 | 0.186519278 | -6.618132919 | 3.64E-11 | 1.10E-09 |
| BZW1      | 3496.872183 | 0.327201522  | 0.049449279 | 6.616911916  | 3.67E-11 | 1.10E-09 |
| ZNF491    | 24.88870646 | -1.069997598 | 0.161751285 | -6.615079414 | 3.71E-11 | 1.12E-09 |
| DUSP1     | 1796.063335 | 0.563620249  | 0.085254447 | 6.611036349  | 3.82E-11 | 1.15E-09 |
| PAGR1     | 232.5675702 | -0.517128328 | 0.078267193 | -6.607216998 | 3.92E-11 | 1.17E-09 |
| TNFRSF10/ | 178.2965648 | 0.766674505  | 0.116103324 | 6.603381166  | 4.02E-11 | 1.20E-09 |
| MYOF      | 4202.427584 | 0.822260933  | 0.124876132 | 6.584612429  | 4.56E-11 | 1.36E-09 |
| DAG1      | 286.7507858 | 0.7238478    | 0.109938144 | 6.584136991  | 4.58E-11 | 1.36E-09 |
| BTBD2     | 507.7056289 | -0.597476698 | 0.090768095 | -6.58245276  | 4.63E-11 | 1.38E-09 |
| C1orf54   | 221.2150602 | 0.613913698  | 0.093273032 | 6.581899248  | 4.64E-11 | 1.38E-09 |
| GPNMB     | 68939.51668 | -0.662961714 | 0.100757791 | -6.579756338 | 4.71E-11 | 1.40E-09 |
| HIST1H4B  | 323.8998949 | -0.705508107 | 0.107231367 | -6.579307225 | 4.73E-11 | 1.40E-09 |
| GNB2L1    | 11471.51703 | -0.348800875 | 0.053104674 | -6.568176518 | 5.09E-11 | 1.51E-09 |
| QPCT      | 644.0887018 | 0.995432915  | 0.151574144 | 6.567300269  | 5.12E-11 | 1.51E-09 |
| CHI3L1    | 26263.89662 | 0.838235545  | 0.127667758 | 6.565757544  | 5.18E-11 | 1.53E-09 |

|          |             |              |             |              |          |          |
|----------|-------------|--------------|-------------|--------------|----------|----------|
| CFL1P1   | 6.411461731 | 2.974873266  | 0.453466962 | 6.560286668  | 5.37E-11 | 1.58E-09 |
| SERTAD1  | 201.6621855 | 0.743353557  | 0.113433095 | 6.553233485  | 5.63E-11 | 1.65E-09 |
| ADM      | 238.2410163 | 1.299426883  | 0.198310276 | 6.552493964  | 5.66E-11 | 1.66E-09 |
| SLCO2B1  | 4427.070368 | -0.821003934 | 0.125392253 | -6.547485302 | 5.85E-11 | 1.71E-09 |
| MAP1LC3A | 336.1861252 | 1.469150955  | 0.22450972  | 6.54381893   | 6.00E-11 | 1.75E-09 |
| PFKP     | 421.7181089 | 0.962696423  | 0.147115197 | 6.543827186  | 6.00E-11 | 1.75E-09 |
| TPT1     | 23055.34526 | -0.527890978 | 0.080673951 | -6.543512156 | 6.01E-11 | 1.75E-09 |
| RPL35    | 4832.109421 | -0.455080958 | 0.069596402 | -6.53885758  | 6.20E-11 | 1.80E-09 |
| CDCA7L   | 101.036267  | -1.002250421 | 0.153304153 | -6.537659964 | 6.25E-11 | 1.82E-09 |
| SREBF2   | 816.2141987 | 0.708400097  | 0.108442356 | 6.532503746  | 6.47E-11 | 1.88E-09 |
| FKBP9    | 275.9698373 | -0.408142786 | 0.062542367 | -6.525860911 | 6.76E-11 | 1.96E-09 |
| SNCA     | 41.60804551 | -1.42965035  | 0.219107997 | -6.52486614  | 6.81E-11 | 1.97E-09 |
| VAMP5    | 105.6867966 | 1.183234878  | 0.181389327 | 6.523178051  | 6.88E-11 | 1.99E-09 |
| CSF1R    | 1703.199097 | -0.75432549  | 0.115764951 | -6.516009252 | 7.22E-11 | 2.08E-09 |
| PCNX     | 849.096108  | 0.489371425  | 0.07511831  | 6.514675638  | 7.28E-11 | 2.10E-09 |
| HOMER3   | 449.0688289 | -0.874299552 | 0.134225132 | -6.513679979 | 7.33E-11 | 2.11E-09 |
| SNX29    | 586.8880554 | -0.404332054 | 0.062076767 | -6.513419935 | 7.35E-11 | 2.11E-09 |
| TBC1D14  | 197.9366784 | -0.497761089 | 0.076439963 | -6.511791304 | 7.43E-11 | 2.13E-09 |
| TBKBP1   | 232.6519589 | 0.807441627  | 0.124108899 | 6.505912399  | 7.72E-11 | 2.21E-09 |
| RGCC     | 5067.042088 | 0.85532322   | 0.131556504 | 6.501565424  | 7.95E-11 | 2.27E-09 |
| GTPBP1   | 324.5862433 | 0.738014224  | 0.11354335  | 6.499845415  | 8.04E-11 | 2.29E-09 |
| IL1A     | 623.2437559 | 1.23010805   | 0.18931053  | 6.497832176  | 8.15E-11 | 2.32E-09 |
| HK2      | 2275.343531 | 0.462435855  | 0.071187441 | 6.496031467  | 8.25E-11 | 2.35E-09 |
| NFKBIZ   | 672.1183643 | 0.602065255  | 0.092703526 | 6.494523816  | 8.33E-11 | 2.37E-09 |
| ENPP4    | 1034.289607 | 0.745989241  | 0.114943317 | 6.490061874  | 8.58E-11 | 2.43E-09 |
| TUBE1    | 217.8595316 | 0.555908628  | 0.085780708 | 6.480578693  | 9.14E-11 | 2.58E-09 |
| VILL     | 53.44804036 | 1.136471906  | 0.175362867 | 6.480687306  | 9.13E-11 | 2.58E-09 |
| FAM129B  | 2176.708204 | 0.876618772  | 0.135310021 | 6.478594599  | 9.26E-11 | 2.61E-09 |
| TK2      | 380.9834278 | -0.484220603 | 0.074767929 | -6.476314204 | 9.40E-11 | 2.65E-09 |
| CXCL9    | 493.5311724 | 3.000948716  | 0.463467814 | 6.474988395  | 9.48E-11 | 2.67E-09 |
| C2orf18  | 1306.720313 | -0.384223354 | 0.059342999 | -6.474619779 | 9.51E-11 | 2.67E-09 |
| RASSF2   | 113.5204871 | -0.998239262 | 0.154219928 | -6.472829262 | 9.62E-11 | 2.70E-09 |
| ZNF652   | 179.0287723 | -0.752041024 | 0.116230439 | -6.47025884  | 9.78E-11 | 2.74E-09 |
| MAZ      | 2420.992133 | -0.39632433  | 0.06129598  | -6.465747529 | 1.01E-10 | 2.82E-09 |
| IRF9     | 589.3866833 | 0.489594994  | 0.075725709 | 6.465373516  | 1.01E-10 | 2.82E-09 |
| MT1F     | 653.6257707 | 1.72286072   | 0.266486319 | 6.465100085  | 1.01E-10 | 2.82E-09 |
| S100A4   | 5779.02128  | -0.873081605 | 0.135120809 | -6.461488882 | 1.04E-10 | 2.89E-09 |
| PBXIP1   | 227.8385443 | -0.703489578 | 0.108886172 | -6.460779772 | 1.04E-10 | 2.89E-09 |
| PTGS1    | 395.0898392 | -0.845780276 | 0.130907753 | -6.460887584 | 1.04E-10 | 2.89E-09 |
| TMEFF1   | 62.41401475 | 1.019789616  | 0.158187844 | 6.446700279  | 1.14E-10 | 3.17E-09 |
| RPL37A   | 4460.892965 | -0.378488516 | 0.058728895 | -6.444672867 | 1.16E-10 | 3.21E-09 |
| PLEKHG6  | 34.18612275 | 1.543424236  | 0.239607322 | 6.441473589  | 1.18E-10 | 3.27E-09 |
| TLE3     | 581.8054725 | -0.581254079 | 0.090250808 | -6.440430724 | 1.19E-10 | 3.29E-09 |
| FUT4     | 413.8010037 | 0.600788914  | 0.093295534 | 6.439632119  | 1.20E-10 | 3.30E-09 |
| BST2     | 3274.595144 | 0.605535293  | 0.09418674  | 6.429092815  | 1.28E-10 | 3.53E-09 |
| TMEM63B  | 465.5638075 | 0.644168915  | 0.100211061 | 6.42812189   | 1.29E-10 | 3.55E-09 |
| BRK1     | 1460.780244 | -0.334015677 | 0.052025243 | -6.420261719 | 1.36E-10 | 3.73E-09 |
| TOP1MT   | 507.4219573 | -0.842144635 | 0.131203527 | -6.418612781 | 1.38E-10 | 3.77E-09 |
| ERVFRD-1 | 7.737917641 | -2.565667191 | 0.399869658 | -6.416258746 | 1.40E-10 | 3.82E-09 |

|          |             |              |             |              |          |          |
|----------|-------------|--------------|-------------|--------------|----------|----------|
| COL1A1   | 21.61506679 | 2.148957947  | 0.335221857 | 6.410554395  | 1.45E-10 | 3.96E-09 |
| ANXA6    | 289.2273381 | -0.680175606 | 0.106155398 | -6.407357681 | 1.48E-10 | 4.04E-09 |
| ZNF449   | 61.0065705  | -0.85533569  | 0.133494656 | -6.407265397 | 1.48E-10 | 4.04E-09 |
| PTRF     | 118.110714  | 1.234036474  | 0.19286629  | 6.398404172  | 1.57E-10 | 4.27E-09 |
| MARCO    | 2579.433179 | -0.7547516   | 0.117996842 | -6.396371184 | 1.59E-10 | 4.32E-09 |
| DRAM2    | 764.0305837 | -0.447980209 | 0.070075682 | -6.392805558 | 1.63E-10 | 4.41E-09 |
| ODC1     | 586.2355046 | 0.392883244  | 0.061456116 | 6.392907181  | 1.63E-10 | 4.41E-09 |
| CNNM4    | 702.0592585 | 0.567916841  | 0.08887491  | 6.390069351  | 1.66E-10 | 4.48E-09 |
| AKR1C2   | 1220.688673 | -0.740835641 | 0.116017906 | -6.385528485 | 1.71E-10 | 4.61E-09 |
| MATK     | 1279.255925 | 0.879606908  | 0.137893991 | 6.378863231  | 1.78E-10 | 4.81E-09 |
| OAS1     | 2518.851683 | 0.877756579  | 0.137644571 | 6.376979287  | 1.81E-10 | 4.86E-09 |
| FOSB     | 33.10562764 | 1.74060628   | 0.273176436 | 6.371729233  | 1.87E-10 | 5.03E-09 |
| SLC1A4   | 1140.848556 | 0.571493255  | 0.089699138 | 6.37122348   | 1.88E-10 | 5.04E-09 |
| NOTCH2   | 2527.648134 | -0.369815252 | 0.058048833 | -6.370761174 | 1.88E-10 | 5.04E-09 |
| GPR160   | 42.75057719 | -1.165804447 | 0.18333078  | -6.359021926 | 2.03E-10 | 5.44E-09 |
| PYGL     | 821.3965513 | -0.466522459 | 0.073385049 | -6.35718674  | 2.05E-10 | 5.49E-09 |
| LRPAP1   | 2481.023    | -0.434561739 | 0.068360683 | -6.356895826 | 2.06E-10 | 5.50E-09 |
| UCP2     | 3358.243442 | -0.657688823 | 0.103563203 | -6.350603311 | 2.14E-10 | 5.72E-09 |
| ENPP3    | 62.97757835 | -1.167171126 | 0.183802468 | -6.350138474 | 2.15E-10 | 5.73E-09 |
| CDKN1A   | 3506.646485 | 0.934650166  | 0.147223675 | 6.348504508  | 2.17E-10 | 5.78E-09 |
| SNHG8    | 130.1158726 | -0.810547854 | 0.127685424 | -6.348006153 | 2.18E-10 | 5.79E-09 |
| PSMA5    | 899.8665151 | 0.532941522  | 0.083972251 | 6.346638487  | 2.20E-10 | 5.83E-09 |
| MOSPD3   | 80.68781548 | -0.635461845 | 0.100182803 | -6.343023195 | 2.25E-10 | 5.96E-09 |
| STOM     | 4929.991363 | 0.767043968  | 0.121011606 | 6.338598353  | 2.32E-10 | 6.13E-09 |
| UBE2S    | 420.9254457 | 0.658402355  | 0.103909441 | 6.336309275  | 2.35E-10 | 6.21E-09 |
| TMC8     | 287.9775788 | -0.981637317 | 0.154981919 | -6.333882853 | 2.39E-10 | 6.30E-09 |
| CR1      | 147.2272007 | -0.952293773 | 0.150365773 | -6.333181792 | 2.40E-10 | 6.32E-09 |
| RGS1     | 411.0347983 | 0.796073355  | 0.125700668 | 6.333087702  | 2.40E-10 | 6.32E-09 |
| IMPDH1   | 809.8662302 | -0.557098049 | 0.088128996 | -6.321393326 | 2.59E-10 | 6.80E-09 |
| PAX5     | 5.474027305 | 3.478076284  | 0.551006379 | 6.312225076  | 2.75E-10 | 7.21E-09 |
| FOSL1    | 43.43527858 | 0.963626716  | 0.152719941 | 6.309763536  | 2.79E-10 | 7.31E-09 |
| NUDT3    | 777.3311932 | -0.495574712 | 0.078545784 | -6.309373786 | 2.80E-10 | 7.32E-09 |
| CCL24    | 1640.217569 | 2.075668706  | 0.329000951 | 6.30900519   | 2.81E-10 | 7.33E-09 |
| VPS26B   | 303.1308067 | -0.425351011 | 0.06746434  | -6.304827302 | 2.89E-10 | 7.52E-09 |
| CMTM7    | 726.0280841 | -0.506460898 | 0.080455776 | -6.294897969 | 3.08E-10 | 8.01E-09 |
| C11orf82 | 65.00104017 | -1.224956266 | 0.19462036  | -6.294080782 | 3.09E-10 | 8.04E-09 |
| AP1M2    | 13.98919166 | 2.275535863  | 0.361620935 | 6.292599919  | 3.12E-10 | 8.10E-09 |
| PRKCDBP  | 166.1515687 | 0.616919799  | 0.098078088 | 6.29008795   | 3.17E-10 | 8.22E-09 |
| RPL13A   | 3118.169433 | -0.474664481 | 0.075469356 | -6.289499543 | 3.18E-10 | 8.24E-09 |
| MEGF9    | 780.1245459 | -0.500510471 | 0.079631596 | -6.285325092 | 3.27E-10 | 8.46E-09 |
| ASAP2    | 68.24042694 | 1.377053323  | 0.219311563 | 6.278981851  | 3.41E-10 | 8.80E-09 |
| DOT1L    | 323.0504092 | 0.702014449  | 0.11197178  | 6.269565857  | 3.62E-10 | 9.33E-09 |
| TUBA4A   | 116.9252386 | 0.950559653  | 0.151642689 | 6.268417287  | 3.65E-10 | 9.39E-09 |
| RMI2     | 37.4019885  | 1.099781187  | 0.175765142 | 6.25710634   | 3.92E-10 | 1.01E-08 |
| MXI1     | 247.268576  | -0.621267581 | 0.099299863 | -6.256479757 | 3.94E-10 | 1.01E-08 |
| CNIH4    | 1004.67454  | 0.720866964  | 0.115254769 | 6.254552136  | 3.99E-10 | 1.02E-08 |
| CLDN12   | 256.4718353 | 0.800458357  | 0.128090666 | 6.249154444  | 4.13E-10 | 1.06E-08 |
| PKD2L1   | 53.5971698  | -1.062669271 | 0.170059951 | -6.248792056 | 4.14E-10 | 1.06E-08 |
| EPSTI1   | 770.4355599 | 1.564049905  | 0.250548402 | 6.242506003  | 4.31E-10 | 1.10E-08 |

|          |             |              |             |              |          |          |
|----------|-------------|--------------|-------------|--------------|----------|----------|
| ATP13A3  | 2786.746141 | 0.4678857    | 0.074960787 | 6.241739456  | 4.33E-10 | 1.10E-08 |
| CD300E   | 101.1503699 | 1.722687877  | 0.27601255  | 6.241338935  | 4.34E-10 | 1.10E-08 |
| GNGT2    | 94.13022648 | -0.946924058 | 0.151804745 | -6.237776405 | 4.44E-10 | 1.13E-08 |
| PPP2R2A  | 536.8999461 | 0.328894251  | 0.052726798 | 6.237705768  | 4.44E-10 | 1.13E-08 |
| COL5A3   | 33.67938848 | 1.834478212  | 0.294199827 | 6.235483659  | 4.50E-10 | 1.14E-08 |
| CASC4    | 598.1225639 | -0.416553922 | 0.066953106 | -6.221577218 | 4.92E-10 | 1.25E-08 |
| MB21D2   | 111.8793403 | 0.569360136  | 0.091582398 | 6.216916659  | 5.07E-10 | 1.28E-08 |
| O3FAR1   | 281.1459028 | -1.050883363 | 0.169095095 | -6.214747781 | 5.14E-10 | 1.30E-08 |
| GRASP    | 99.72982941 | 1.355628216  | 0.218194019 | 6.212948566  | 5.20E-10 | 1.31E-08 |
| ZCCHC24  | 177.8649181 | -0.755814763 | 0.121745934 | -6.208131435 | 5.36E-10 | 1.35E-08 |
| ZNF416   | 43.46722499 | -0.590425922 | 0.095133825 | -6.206267029 | 5.43E-10 | 1.36E-08 |
| ARHGDIB  | 9796.404203 | -0.424301627 | 0.068436016 | -6.199975562 | 5.65E-10 | 1.42E-08 |
| B3GALNT1 | 243.2070229 | -0.739072401 | 0.119213159 | -6.199587398 | 5.66E-10 | 1.42E-08 |
| CXCL13   | 11.34335274 | 3.507890328  | 0.565815063 | 6.199711813  | 5.66E-10 | 1.42E-08 |
| VEGFA    | 220.9701283 | 1.509615275  | 0.243686873 | 6.194897799  | 5.83E-10 | 1.46E-08 |
| RPL26    | 4447.553515 | -0.556228751 | 0.089793467 | -6.194534722 | 5.85E-10 | 1.46E-08 |
| STON1    | 17.0426383  | 2.27342841   | 0.367053905 | 6.19371808   | 5.88E-10 | 1.47E-08 |
| LAG3     | 20.7690253  | 2.291441938  | 0.369986658 | 6.193309643  | 5.89E-10 | 1.47E-08 |
| FAM165B  | 162.2270862 | -0.603876907 | 0.097520545 | -6.192304491 | 5.93E-10 | 1.48E-08 |
| FAM105A  | 179.5357111 | -0.653869817 | 0.105648618 | -6.189099556 | 6.05E-10 | 1.50E-08 |
| IL18     | 1618.962136 | 0.617908566  | 0.099892361 | 6.185743951  | 6.18E-10 | 1.53E-08 |
| FPR1     | 303.7498791 | -1.031440557 | 0.16682092  | -6.182920924 | 6.29E-10 | 1.56E-08 |
| XIAP     | 573.8306015 | 0.365234991  | 0.059091107 | 6.180879195  | 6.37E-10 | 1.58E-08 |
| SLC45A4  | 192.8267139 | -0.5288871   | 0.085594443 | -6.178988736 | 6.45E-10 | 1.59E-08 |
| HSPA1B   | 567.3813708 | 0.562902871  | 0.091123918 | 6.177333902  | 6.52E-10 | 1.61E-08 |
| SPSB1    | 488.4368674 | 0.702351805  | 0.113780395 | 6.172871905  | 6.71E-10 | 1.65E-08 |
| CAMK1D   | 215.0519833 | -0.4720043   | 0.076490562 | -6.170752145 | 6.80E-10 | 1.67E-08 |
| RPS15A   | 2540.980567 | -0.505805129 | 0.081967642 | -6.170790247 | 6.79E-10 | 1.67E-08 |
| CXCR7    | 24.08721501 | -1.212405472 | 0.196486014 | -6.170441596 | 6.81E-10 | 1.67E-08 |
| HHEX     | 132.4836932 | -0.75608519  | 0.12253783  | -6.17021854  | 6.82E-10 | 1.67E-08 |
| MFHAS1   | 507.9245434 | 0.609872062  | 0.098913169 | 6.165731684  | 7.02E-10 | 1.72E-08 |
| TGIF1    | 22.6957735  | 1.086340943  | 0.176560049 | 6.152812874  | 7.61E-10 | 1.86E-08 |
| CDKN2B   | 48.64705253 | 0.923403357  | 0.150092227 | 6.152239681  | 7.64E-10 | 1.86E-08 |
| MCL1     | 2921.985881 | 0.589972192  | 0.095895923 | 6.152213509  | 7.64E-10 | 1.86E-08 |
| CDK14    | 1175.110656 | 0.675442776  | 0.109818795 | 6.150520729  | 7.72E-10 | 1.88E-08 |
| WBP1     | 384.3144018 | -0.530275116 | 0.086248687 | -6.148210895 | 7.84E-10 | 1.91E-08 |
| SLC25A28 | 116.3847672 | 0.891286507  | 0.145058727 | 6.144314955  | 8.03E-10 | 1.95E-08 |
| ACSL1    | 4091.009222 | 1.201415297  | 0.195573947 | 6.143023217  | 8.10E-10 | 1.96E-08 |
| AGPAT3   | 1435.894729 | 0.269426619  | 0.043876934 | 6.140506968  | 8.23E-10 | 1.99E-08 |
| RPS4X    | 10267.73912 | -0.437028856 | 0.071175988 | -6.140116485 | 8.25E-10 | 2.00E-08 |
| RPL27A   | 5236.594656 | -0.565913227 | 0.092287386 | -6.132075608 | 8.67E-10 | 2.10E-08 |
| MUM1     | 75.78203339 | -0.56361287  | 0.091942776 | -6.130039734 | 8.79E-10 | 2.12E-08 |
| NDRG1    | 1433.744986 | 0.833370375  | 0.135953462 | 6.129820918  | 8.80E-10 | 2.12E-08 |
| ELF4     | 746.0435439 | 0.479616458  | 0.078259767 | 6.128518841  | 8.87E-10 | 2.14E-08 |
| NPC2     | 8989.018187 | -0.421798243 | 0.068831227 | -6.128007072 | 8.90E-10 | 2.14E-08 |
| CNRIP1   | 92.52540876 | -0.801212251 | 0.130780572 | -6.126385891 | 8.99E-10 | 2.16E-08 |
| RRN3P1   | 130.1372555 | -0.669279753 | 0.109268764 | -6.125078482 | 9.06E-10 | 2.17E-08 |
| SLC39A4  | 131.8765708 | -0.738938898 | 0.120743913 | -6.119885313 | 9.36E-10 | 2.24E-08 |
| ENDOD1   | 78.93617085 | 0.757732577  | 0.123829777 | 6.119146761  | 9.41E-10 | 2.25E-08 |

|           |             |              |             |              |          |          |
|-----------|-------------|--------------|-------------|--------------|----------|----------|
| IRF4      | 24.09335441 | 1.757678987  | 0.287326252 | 6.117363015  | 9.51E-10 | 2.27E-08 |
| KIAA0247  | 1490.394693 | 0.453403519  | 0.074155462 | 6.114229593  | 9.70E-10 | 2.31E-08 |
| CXCR4     | 915.2070598 | -1.16967129  | 0.191502515 | -6.107863856 | 1.01E-09 | 2.41E-08 |
| MARVELD1  | 509.150339  | -0.50898754  | 0.083339263 | -6.107415897 | 1.01E-09 | 2.41E-08 |
| ELMO1     | 259.434537  | -0.666690546 | 0.109219167 | -6.10415336  | 1.03E-09 | 2.46E-08 |
| TSPAN13   | 99.38790734 | -0.882477288 | 0.144629867 | -6.101625528 | 1.05E-09 | 2.49E-08 |
| RAB13     | 1940.848698 | 0.488679888  | 0.080173733 | 6.095261753  | 1.09E-09 | 2.59E-08 |
| HMOX1     | 4079.107474 | -0.488374826 | 0.08017178  | -6.091605132 | 1.12E-09 | 2.65E-08 |
| CRTAP     | 1472.210341 | -0.57034716  | 0.093733429 | -6.084778541 | 1.17E-09 | 2.75E-08 |
| ELMSAN1   | 267.4165858 | -0.466269726 | 0.076627213 | -6.08491039  | 1.17E-09 | 2.75E-08 |
| NR4A2     | 35.89997513 | 1.444082105  | 0.237324408 | 6.084844449  | 1.17E-09 | 2.75E-08 |
| SYT11     | 215.1954616 | 0.58544112   | 0.096238986 | 6.08320126   | 1.18E-09 | 2.78E-08 |
| ARHGAP4   | 193.7857438 | -0.568362963 | 0.093436382 | -6.082887135 | 1.18E-09 | 2.78E-08 |
| LILRB2    | 603.2587895 | -0.923764078 | 0.151966306 | -6.078742735 | 1.21E-09 | 2.85E-08 |
| CCND1     | 296.4333664 | 0.879038934  | 0.144620814 | 6.078232509  | 1.22E-09 | 2.85E-08 |
| BHLHE40   | 2455.453728 | 0.85828289   | 0.141265556 | 6.07566994   | 1.23E-09 | 2.89E-08 |
| EXT1      | 95.80465205 | 0.698342735  | 0.115238601 | 6.059972346  | 1.36E-09 | 3.19E-08 |
| RBPJ      | 869.0650655 | -0.298484145 | 0.049331252 | -6.050609608 | 1.44E-09 | 3.37E-08 |
| BAG3      | 1699.27894  | 0.645168214  | 0.106723048 | 6.045256639  | 1.49E-09 | 3.48E-08 |
| HLA-E     | 11911.35907 | 0.82179664   | 0.136129677 | 6.036866167  | 1.57E-09 | 3.66E-08 |
| TSPAN4    | 573.7617719 | -0.60757973  | 0.10072829  | -6.031867806 | 1.62E-09 | 3.78E-08 |
| FXYD6     | 927.0714202 | -0.704457717 | 0.116878686 | -6.027255594 | 1.67E-09 | 3.88E-08 |
| FBXO10    | 256.4392196 | -0.714740731 | 0.118617253 | -6.025605164 | 1.68E-09 | 3.91E-08 |
| NR1H3     | 2371.293844 | 0.662968701  | 0.110038608 | 6.024873555  | 1.69E-09 | 3.93E-08 |
| CELF1     | 66.1125182  | 1.099042097  | 0.182517392 | 6.021574638  | 1.73E-09 | 4.00E-08 |
| ERCC2     | 100.9707428 | -0.706209987 | 0.117295409 | -6.02078113  | 1.74E-09 | 4.02E-08 |
| ALAD      | 244.4845776 | -0.502034049 | 0.08339297  | -6.020100393 | 1.74E-09 | 4.03E-08 |
| RPS29     | 66.31770055 | -1.045259042 | 0.173849167 | -6.012447819 | 1.83E-09 | 4.22E-08 |
| RNPEPL1   | 1999.914404 | -0.385795568 | 0.064201594 | -6.009127605 | 1.87E-09 | 4.30E-08 |
| EID3      | 300.4431796 | 0.844024079  | 0.140656294 | 6.000613647  | 1.97E-09 | 4.53E-08 |
| XPNPEP1   | 360.8427527 | 0.393733198  | 0.065639717 | 5.998398781  | 1.99E-09 | 4.58E-08 |
| PDCD1LG2  | 1275.584232 | 0.866061665  | 0.144400025 | 5.997655905  | 2.00E-09 | 4.60E-08 |
| RNASE6    | 158.6543354 | -1.011466576 | 0.168725731 | -5.994738144 | 2.04E-09 | 4.68E-08 |
| BTD       | 288.9427341 | -0.459718338 | 0.076731176 | -5.99128492  | 2.08E-09 | 4.77E-08 |
| LRRC16B   | 20.15682396 | 1.766985711  | 0.294948282 | 5.990832358  | 2.09E-09 | 4.78E-08 |
| PLEKHG3   | 405.2128483 | 0.801519033  | 0.133912589 | 5.985389732  | 2.16E-09 | 4.94E-08 |
| PLK3      | 415.2994876 | 1.095077265  | 0.183082958 | 5.981317316  | 2.21E-09 | 5.05E-08 |
| LOC100506 | 300.1948078 | -0.615117242 | 0.102882884 | -5.978810244 | 2.25E-09 | 5.13E-08 |
| ST3GAL4   | 63.83232645 | 0.996287232  | 0.166725104 | 5.975628195  | 2.29E-09 | 5.22E-08 |
| NPR1      | 59.65604747 | 1.355452838  | 0.227008927 | 5.970923062  | 2.36E-09 | 5.37E-08 |
| RGS14     | 21.60191493 | -1.320181098 | 0.221201713 | -5.968222756 | 2.40E-09 | 5.45E-08 |
| PARP6     | 820.767395  | 0.568915439  | 0.095340669 | 5.967185294  | 2.41E-09 | 5.48E-08 |
| MIR155HG  | 23.86342811 | 1.297593005  | 0.217478721 | 5.966528578  | 2.42E-09 | 5.49E-08 |
| GNPDA1    | 727.342357  | -0.289694713 | 0.0486454   | -5.955233499 | 2.60E-09 | 5.88E-08 |
| PIK3IP1   | 85.90590931 | -1.182121146 | 0.198505924 | -5.955092539 | 2.60E-09 | 5.88E-08 |
| KLHDC7B   | 38.87496553 | 1.131181617  | 0.190333213 | 5.943164623  | 2.80E-09 | 6.31E-08 |
| ENO2      | 187.974382  | 0.907146131  | 0.15275379  | 5.938616195  | 2.87E-09 | 6.48E-08 |
| MDK       | 544.8511944 | 0.867418977  | 0.146069019 | 5.938418579  | 2.88E-09 | 6.48E-08 |
| ATPAF1    | 244.1365264 | -0.391882522 | 0.066010051 | -5.93670986  | 2.91E-09 | 6.54E-08 |

|           |             |              |             |              |          |          |
|-----------|-------------|--------------|-------------|--------------|----------|----------|
| MFSD2A    | 300.5448539 | 0.613485806  | 0.103423055 | 5.931808961  | 3.00E-09 | 6.73E-08 |
| MBNL3     | 139.981749  | -0.610806971 | 0.102996964 | -5.930339591 | 3.02E-09 | 6.78E-08 |
| PIK3R1    | 457.8080971 | -0.511241084 | 0.086206167 | -5.930446785 | 3.02E-09 | 6.78E-08 |
| TLR4      | 1907.832603 | -0.815901984 | 0.137686176 | -5.925809041 | 3.11E-09 | 6.96E-08 |
| DYRK4     | 318.9868607 | -1.125951722 | 0.190068664 | -5.923920837 | 3.14E-09 | 7.03E-08 |
| ABCG2     | 991.51359   | -0.533726245 | 0.090175187 | -5.918770582 | 3.24E-09 | 7.25E-08 |
| CSF3R     | 967.9321499 | -0.821351282 | 0.138799418 | -5.917541232 | 3.27E-09 | 7.29E-08 |
| APPL2     | 195.6810004 | -0.563489729 | 0.095248773 | -5.91597886  | 3.30E-09 | 7.35E-08 |
| ATP2C1    | 1043.777228 | 0.819237015  | 0.138544177 | 5.913182602  | 3.36E-09 | 7.47E-08 |
| SYT7      | 15.32946501 | 2.792945582  | 0.472593707 | 5.909823899  | 3.42E-09 | 7.62E-08 |
| ARRB2     | 6134.939798 | -0.354664752 | 0.060021155 | -5.908995826 | 3.44E-09 | 7.64E-08 |
| ATP8B1    | 30.12847516 | -1.593594199 | 0.26987328  | -5.904972128 | 3.53E-09 | 7.82E-08 |
| IGSF10    | 20.78093734 | -1.565465611 | 0.265366526 | -5.899258048 | 3.65E-09 | 8.08E-08 |
| PLEKHN1   | 16.27567293 | 1.599884508  | 0.27119243  | 5.899443832  | 3.65E-09 | 8.08E-08 |
| MET       | 13.57086391 | 1.993754887  | 0.338595091 | 5.888315979  | 3.90E-09 | 8.62E-08 |
| C1R       | 144.3703428 | 1.291100501  | 0.219348857 | 5.886059839  | 3.96E-09 | 8.73E-08 |
| LOC653786 | 20.24753381 | -1.086608663 | 0.184669724 | -5.884065015 | 4.00E-09 | 8.83E-08 |
| NDRG2     | 41.80496863 | 1.559341832  | 0.265080185 | 5.882528846  | 4.04E-09 | 8.90E-08 |
| MSRB2     | 428.9653044 | -0.497905702 | 0.08465743  | -5.881417641 | 4.07E-09 | 8.95E-08 |
| NFKBIE    | 520.1791877 | 0.600120627  | 0.102048296 | 5.880751054  | 4.08E-09 | 8.97E-08 |
| TP53INP2  | 112.8508105 | 0.940556837  | 0.159944338 | 5.880525989  | 4.09E-09 | 8.98E-08 |
| GTF2I     | 191.751597  | 0.567183475  | 0.096465306 | 5.879662844  | 4.11E-09 | 9.01E-08 |
| LILRB5    | 247.8557522 | -1.40764165  | 0.239555131 | -5.876065533 | 4.20E-09 | 9.20E-08 |
| ATP8B2    | 33.89272338 | 1.03987755   | 0.17710921  | 5.871391726  | 4.32E-09 | 9.45E-08 |
| FAM83G    | 128.1727025 | 0.952682469  | 0.162483782 | 5.863246532  | 4.54E-09 | 9.91E-08 |
| PIM1      | 3311.803365 | 0.688008495  | 0.117343864 | 5.863182527  | 4.54E-09 | 9.91E-08 |
| PPA1      | 1266.216372 | 0.416990484  | 0.071123826 | 5.862880369  | 4.55E-09 | 9.91E-08 |
| EIF1B     | 3330.203038 | 0.5227626    | 0.089291626 | 5.854553501  | 4.78E-09 | 1.04E-07 |
| ITGAE     | 111.4007053 | -0.869941107 | 0.148729896 | -5.849134118 | 4.94E-09 | 1.07E-07 |
| ARHGEF35  | 51.06989543 | 1.31294772   | 0.224690966 | 5.843348936  | 5.12E-09 | 1.11E-07 |
| VASN      | 20.5587021  | 1.582101994  | 0.270755591 | 5.843284678  | 5.12E-09 | 1.11E-07 |
| NGFRAP1   | 69.29004786 | -0.723473302 | 0.123897084 | -5.839308574 | 5.24E-09 | 1.14E-07 |
| MICALCL   | 33.80652713 | 0.985326015  | 0.168836963 | 5.83596148   | 5.35E-09 | 1.16E-07 |
| NRSN2     | 47.3272992  | 1.301042234  | 0.222929931 | 5.836103883  | 5.34E-09 | 1.16E-07 |
| TMEM56    | 19.07831409 | -1.618777668 | 0.27747635  | -5.83393024  | 5.41E-09 | 1.17E-07 |
| H1FO      | 269.5928776 | 0.789156644  | 0.135338282 | 5.830993517  | 5.51E-09 | 1.19E-07 |
| LGALS3    | 9252.918758 | -0.458322918 | 0.078608909 | -5.830419565 | 5.53E-09 | 1.19E-07 |
| RNF125    | 52.88384622 | -1.032574723 | 0.177097496 | -5.830543894 | 5.52E-09 | 1.19E-07 |
| FABP5     | 4839.744092 | -0.653662296 | 0.112138413 | -5.829066742 | 5.57E-09 | 1.20E-07 |
| CD164     | 13290.66973 | 0.294200905  | 0.050473825 | 5.828781677  | 5.58E-09 | 1.20E-07 |
| LOC730101 | 19.42552487 | 1.533814234  | 0.263207502 | 5.827395576  | 5.63E-09 | 1.21E-07 |
| EPT1      | 268.5290685 | 0.607828945  | 0.104372558 | 5.823647096  | 5.76E-09 | 1.23E-07 |
| PCED1B    | 115.3175561 | -0.698270853 | 0.119903261 | -5.82361854  | 5.76E-09 | 1.23E-07 |
| BRI3BP    | 151.759872  | -0.675968845 | 0.116134861 | -5.820550707 | 5.87E-09 | 1.25E-07 |
| C11orf96  | 12.30173488 | 3.964985624  | 0.683600968 | 5.800146295  | 6.63E-09 | 1.41E-07 |
| CCL18     | 32426.69016 | 0.740129448  | 0.127634686 | 5.798811202  | 6.68E-09 | 1.42E-07 |
| MREG      | 1731.019577 | 0.650238703  | 0.112182382 | 5.796264031  | 6.78E-09 | 1.44E-07 |
| ITGA4     | 218.7079474 | -0.738321445 | 0.127386337 | -5.795923333 | 6.79E-09 | 1.45E-07 |
| HPS5      | 1327.236167 | 0.343696185  | 0.059311223 | 5.794791781  | 6.84E-09 | 1.45E-07 |

|           |             |              |             |              |          |          |
|-----------|-------------|--------------|-------------|--------------|----------|----------|
| TPM1      | 74.5257404  | -0.453013672 | 0.078181398 | -5.794392061 | 6.86E-09 | 1.46E-07 |
| MOV10     | 255.6421961 | 0.612750408  | 0.105829347 | 5.78998572   | 7.04E-09 | 1.49E-07 |
| TM4SF19   | 6415.490551 | 0.608691799  | 0.105204491 | 5.785796748  | 7.22E-09 | 1.53E-07 |
| RHOBTB1   | 55.61745946 | -0.894760113 | 0.154802681 | -5.780003979 | 7.47E-09 | 1.58E-07 |
| BCAT1     | 1533.443007 | 0.759896233  | 0.131569538 | 5.775624377  | 7.67E-09 | 1.62E-07 |
| TYMP      | 8218.49514  | 0.774076111  | 0.134052117 | 5.774441541  | 7.72E-09 | 1.63E-07 |
| MGST2     | 833.2352571 | -0.433812605 | 0.07520022  | -5.768767753 | 7.99E-09 | 1.68E-07 |
| FABP4     | 6653.34902  | -0.941323797 | 0.163212406 | -5.767476985 | 8.05E-09 | 1.69E-07 |
| GCLM      | 336.9625198 | 0.597403138  | 0.103609209 | 5.765926998  | 8.12E-09 | 1.71E-07 |
| PECR      | 83.56117218 | -0.658342807 | 0.114234362 | -5.763089096 | 8.26E-09 | 1.74E-07 |
| AP5B1     | 604.0981198 | 0.513721228  | 0.089156947 | 5.761987661  | 8.31E-09 | 1.74E-07 |
| CCRL2     | 1878.936631 | 0.665819042  | 0.115603188 | 5.759521467  | 8.44E-09 | 1.77E-07 |
| LINC00263 | 63.24816366 | -0.734242415 | 0.127487671 | -5.759320938 | 8.45E-09 | 1.77E-07 |
| TNS3      | 2548.628956 | 0.591448783  | 0.102708858 | 5.758498303  | 8.49E-09 | 1.77E-07 |
| PRR11     | 42.25480946 | -0.871548666 | 0.151371268 | -5.75768886  | 8.53E-09 | 1.78E-07 |
| RPL21     | 7562.681858 | -0.43767423  | 0.076018616 | -5.757461147 | 8.54E-09 | 1.78E-07 |
| C5orf4    | 17.15993296 | -1.734516844 | 0.3015151   | -5.752669905 | 8.78E-09 | 1.83E-07 |
| PABPC1    | 11295.66516 | -0.472779302 | 0.082197265 | -5.751764382 | 8.83E-09 | 1.84E-07 |
| ARID5A    | 41.75843467 | 0.702119754  | 0.122098102 | 5.750455917  | 8.90E-09 | 1.85E-07 |
| NRP1      | 2454.435142 | 0.534584487  | 0.0929779   | 5.749586608  | 8.95E-09 | 1.86E-07 |
| LOC28597  | 18.67261522 | 1.834234907  | 0.31909786  | 5.748189307  | 9.02E-09 | 1.87E-07 |
| HCK       | 3461.339419 | 0.51009486   | 0.088789404 | 5.744996986  | 9.19E-09 | 1.91E-07 |
| SBNO2     | 558.0229018 | 0.548042269  | 0.09547717  | 5.740034709  | 9.47E-09 | 1.96E-07 |
| DERL1     | 886.945755  | 0.435423322  | 0.075910698 | 5.735994148  | 9.69E-09 | 2.00E-07 |
| NMB       | 206.7490699 | -0.732516398 | 0.127737985 | -5.734522896 | 9.78E-09 | 2.02E-07 |
| GGA2      | 1730.629456 | -0.374386365 | 0.065308223 | -5.732606811 | 9.89E-09 | 2.04E-07 |
| CCDC106   | 233.4903339 | -0.5602669   | 0.097754387 | -5.731373494 | 9.96E-09 | 2.05E-07 |
| ZNF710    | 285.1402249 | -0.741643118 | 0.129530338 | -5.725632523 | 1.03E-08 | 2.12E-07 |
| HS3ST1    | 20.45249791 | -1.58605929  | 0.277045387 | -5.724907777 | 1.03E-08 | 2.13E-07 |
| C15orf52  | 91.28861739 | -0.777819816 | 0.135883192 | -5.724179766 | 1.04E-08 | 2.14E-07 |
| EYA4      | 7.265600571 | 2.96630243   | 0.518629876 | 5.719497791  | 1.07E-08 | 2.19E-07 |
| POPDC3    | 18.24589516 | 1.764375267  | 0.308538057 | 5.718501266  | 1.07E-08 | 2.20E-07 |
| ARID5B    | 279.5066235 | 0.866447327  | 0.151587845 | 5.715810051  | 1.09E-08 | 2.24E-07 |
| SNX5      | 1473.128369 | -0.397871474 | 0.069612318 | -5.715532601 | 1.09E-08 | 2.24E-07 |
| UBE2J1    | 1616.683561 | 0.344045151  | 0.06019694  | 5.715326275  | 1.09E-08 | 2.24E-07 |
| RPL4      | 17690.55381 | -0.399097302 | 0.069870563 | -5.711952014 | 1.12E-08 | 2.28E-07 |
| TPD52L1   | 31.68273333 | -1.838125654 | 0.321842283 | -5.71126217  | 1.12E-08 | 2.29E-07 |
| FOSL2     | 597.5651183 | 1.134803808  | 0.198779431 | 5.708859311  | 1.14E-08 | 2.32E-07 |
| MIF4GD    | 90.4597314  | -0.564899189 | 0.09895767  | -5.708493205 | 1.14E-08 | 2.32E-07 |
| METTL7B   | 53.29602264 | 0.836579273  | 0.146580624 | 5.707297799  | 1.15E-08 | 2.33E-07 |
| ACAT1     | 849.828969  | -0.379101288 | 0.06642899  | -5.706865133 | 1.15E-08 | 2.34E-07 |
| ACOT7     | 619.4281681 | 0.719516637  | 0.126100423 | 5.705901846  | 1.16E-08 | 2.35E-07 |
| CYLD      | 856.5264216 | 0.53870004   | 0.094425979 | 5.70499818   | 1.16E-08 | 2.36E-07 |
| DUSP14    | 190.2147511 | 0.745188373  | 0.130650581 | 5.703674373  | 1.17E-08 | 2.37E-07 |
| ASB6      | 221.7529207 | 0.81943731   | 0.143821398 | 5.697603567  | 1.22E-08 | 2.46E-07 |
| AFF4      | 911.220255  | 0.435795223  | 0.07651839  | 5.695300458  | 1.23E-08 | 2.49E-07 |
| PDXP      | 105.9766708 | -0.732505259 | 0.128636154 | -5.69439644  | 1.24E-08 | 2.50E-07 |
| GLUL      | 5422.001745 | -0.567537434 | 0.099690264 | -5.693007634 | 1.25E-08 | 2.51E-07 |
| C1orf21   | 49.12575002 | -1.000241657 | 0.175705008 | -5.692732755 | 1.25E-08 | 2.52E-07 |

|           |             |              |             |              |          |          |
|-----------|-------------|--------------|-------------|--------------|----------|----------|
| SNAI1     | 5.628004995 | 2.76542537   | 0.48594998  | 5.69076136   | 1.26E-08 | 2.54E-07 |
| RRAGD     | 1797.254732 | -0.312992953 | 0.055006736 | -5.690084033 | 1.27E-08 | 2.55E-07 |
| PDE4A     | 660.0712334 | 0.563837734  | 0.099122478 | 5.688293361  | 1.28E-08 | 2.57E-07 |
| CNP       | 919.031252  | 0.656149723  | 0.115359633 | 5.687862441  | 1.29E-08 | 2.57E-07 |
| HMG20B    | 1141.892346 | 0.587498215  | 0.103287189 | 5.688006637  | 1.29E-08 | 2.57E-07 |
| PPP1R18   | 1222.183221 | 0.59923264   | 0.105401178 | 5.685255642  | 1.31E-08 | 2.61E-07 |
| ZZZ3      | 316.5964554 | -0.419751106 | 0.073858881 | -5.683150061 | 1.32E-08 | 2.64E-07 |
| FICD      | 350.2259884 | 0.443802521  | 0.078094422 | 5.682896544  | 1.32E-08 | 2.64E-07 |
| NFAT5     | 657.9144795 | 0.404041585  | 0.071105731 | 5.682264657  | 1.33E-08 | 2.65E-07 |
| RPL12     | 2422.002879 | -0.402813247 | 0.070965775 | -5.676162139 | 1.38E-08 | 2.74E-07 |
| PDLIM5    | 2118.797452 | 0.399415257  | 0.070409137 | 5.672775957  | 1.41E-08 | 2.79E-07 |
| RNF31     | 777.6709771 | 0.333946966  | 0.058895839 | 5.670128333  | 1.43E-08 | 2.83E-07 |
| MYD88     | 1630.626407 | 0.549302495  | 0.096888642 | 5.669420907  | 1.43E-08 | 2.84E-07 |
| RGS16     | 17.25347752 | 1.87546156   | 0.330815801 | 5.669201877  | 1.43E-08 | 2.84E-07 |
| PDLIM7    | 1406.923906 | 0.739436441  | 0.13051337  | 5.665599159  | 1.47E-08 | 2.90E-07 |
| PKM       | 39.51359901 | 0.74827779   | 0.132098496 | 5.664544373  | 1.47E-08 | 2.92E-07 |
| C17orf58  | 123.4353645 | 0.639600792  | 0.112928923 | 5.663746481  | 1.48E-08 | 2.93E-07 |
| ACOT9     | 1143.365508 | 0.479287277  | 0.084667462 | 5.66082015   | 1.51E-08 | 2.97E-07 |
| KARS      | 348.222041  | 0.525352866  | 0.09283487  | 5.659003648  | 1.52E-08 | 3.00E-07 |
| SRXN1     | 1173.04578  | 0.661868816  | 0.116963675 | 5.658755303  | 1.52E-08 | 3.00E-07 |
| MEMO1     | 996.3074281 | -0.251528907 | 0.044501689 | -5.652120473 | 1.58E-08 | 3.12E-07 |
| SAMSN1    | 338.6653631 | -1.005415821 | 0.177945643 | -5.650128892 | 1.60E-08 | 3.15E-07 |
| LRP8      | 114.3537608 | 0.596205077  | 0.105534488 | 5.649386181  | 1.61E-08 | 3.16E-07 |
| ZNF33B    | 41.37795953 | -1.023844982 | 0.181390055 | -5.644438354 | 1.66E-08 | 3.25E-07 |
| GPR68     | 48.43904696 | 1.089291346  | 0.193005572 | 5.643833677  | 1.66E-08 | 3.26E-07 |
| PDGFA     | 67.36218458 | 1.223161623  | 0.2167355   | 5.643568415  | 1.67E-08 | 3.26E-07 |
| C10orf10  | 13.98502749 | 1.887056105  | 0.334964236 | 5.63360473   | 1.76E-08 | 3.45E-07 |
| FAIM3     | 256.5210545 | -0.754747167 | 0.133976358 | -5.633435463 | 1.77E-08 | 3.45E-07 |
| TRAF3IP2  | 528.2163923 | 0.477281408  | 0.084722494 | 5.633467435  | 1.77E-08 | 3.45E-07 |
| MAPK13    | 1877.548903 | 0.507989545  | 0.090225824 | 5.63020125   | 1.80E-08 | 3.51E-07 |
| ITGAX     | 4145.446173 | 0.550816747  | 0.097855002 | 5.628907414  | 1.81E-08 | 3.53E-07 |
| NUP98     | 725.3583068 | 0.480097793  | 0.085290102 | 5.628997736  | 1.81E-08 | 3.53E-07 |
| SLC3A2    | 3612.322999 | 0.553684401  | 0.098436829 | 5.624768735  | 1.86E-08 | 3.61E-07 |
| DRAM1     | 4551.891546 | 0.433531563  | 0.077135254 | 5.620407567  | 1.91E-08 | 3.70E-07 |
| ZNF238    | 16.10023302 | -1.069043465 | 0.190329802 | -5.616794924 | 1.95E-08 | 3.77E-07 |
| C8B       | 95.63127027 | -1.095915662 | 0.195158789 | -5.615507592 | 1.96E-08 | 3.79E-07 |
| CBLN3     | 23.91829796 | 1.155314429  | 0.20573966  | 5.615419177  | 1.96E-08 | 3.79E-07 |
| SNHG6     | 359.9025303 | -0.473710493 | 0.084392673 | -5.613170856 | 1.99E-08 | 3.84E-07 |
| CXCL1     | 62.57967252 | 1.870634936  | 0.333316227 | 5.612192816  | 2.00E-08 | 3.86E-07 |
| UBE2Z     | 1739.158121 | 0.345156125  | 0.061508532 | 5.611516212  | 2.01E-08 | 3.87E-07 |
| CEMP1     | 46.49644314 | -0.829874389 | 0.147903991 | -5.610899209 | 2.01E-08 | 3.88E-07 |
| DUSP4     | 31.31831582 | 1.907263001  | 0.340014573 | 5.609356636  | 2.03E-08 | 3.91E-07 |
| IL23A     | 64.81167508 | 2.674459949  | 0.47682879  | 5.608847465  | 2.04E-08 | 3.92E-07 |
| APOL4     | 142.5183879 | 1.263676711  | 0.225380281 | 5.606864557  | 2.06E-08 | 3.96E-07 |
| ARHGAP31  | 1096.32737  | 0.379343178  | 0.067672676 | 5.605558999  | 2.08E-08 | 3.98E-07 |
| OR6K3     | 76.66454864 | -0.796975986 | 0.142180687 | -5.605374432 | 2.08E-08 | 3.98E-07 |
| SERPINE2  | 56.24691384 | 2.293116925  | 0.409453374 | 5.600434796  | 2.14E-08 | 4.09E-07 |
| LOC10013: | 71.03711437 | 1.108035623  | 0.197874641 | 5.599684823  | 2.15E-08 | 4.11E-07 |
| FAM100B   | 1774.365536 | 0.529636439  | 0.094622046 | 5.597389427  | 2.18E-08 | 4.16E-07 |

|           |             |              |             |              |          |          |
|-----------|-------------|--------------|-------------|--------------|----------|----------|
| SLC50A1   | 761.7602399 | 0.341037966  | 0.061019157 | 5.589031084  | 2.28E-08 | 4.36E-07 |
| LOC100128 | 36.98761349 | -0.878456066 | 0.157246617 | -5.586486268 | 2.32E-08 | 4.42E-07 |
| CMKLR1    | 26.02899383 | 2.240253979  | 0.401094064 | 5.585358097  | 2.33E-08 | 4.44E-07 |
| HCG4      | 21.75234317 | 1.098212871  | 0.196652826 | 5.58452625   | 2.34E-08 | 4.46E-07 |
| ABCC5     | 130.8007902 | -0.844306364 | 0.151192294 | -5.584321415 | 2.35E-08 | 4.46E-07 |
| TNFRSF9   | 148.5843405 | 1.415691394  | 0.253612311 | 5.582108332  | 2.38E-08 | 4.51E-07 |
| ZNF117    | 211.8759334 | -0.651947359 | 0.116789509 | -5.5822425   | 2.37E-08 | 4.51E-07 |
| TBC1D7    | 379.7102285 | 0.515665824  | 0.092408358 | 5.580294193  | 2.40E-08 | 4.55E-07 |
| STK17A    | 321.9714398 | 0.961586628  | 0.172346665 | 5.579374724  | 2.41E-08 | 4.57E-07 |
| PTGIR     | 12.76906731 | 1.932449015  | 0.34647157  | 5.577511062  | 2.44E-08 | 4.62E-07 |
| TACC1     | 1748.607731 | -0.372827295 | 0.066900921 | -5.572827525 | 2.51E-08 | 4.74E-07 |
| APBA3     | 217.4148673 | 0.544695271  | 0.097748289 | 5.572427656  | 2.51E-08 | 4.74E-07 |
| ANP32A    | 851.7777801 | -0.379977452 | 0.068200282 | -5.571493827 | 2.53E-08 | 4.76E-07 |
| IL4I1     | 833.9659885 | 0.926723166  | 0.166411498 | 5.568864986  | 2.56E-08 | 4.83E-07 |
| TFCP2L1   | 315.067797  | -0.47724835  | 0.085705003 | -5.568500483 | 2.57E-08 | 4.84E-07 |
| TNFRSF12A | 241.0977073 | 0.696086209  | 0.125009884 | 5.568249393  | 2.57E-08 | 4.84E-07 |
| LOC100289 | 78.56818108 | 1.199634485  | 0.215520678 | 5.566215261  | 2.60E-08 | 4.89E-07 |
| CFD       | 1381.340594 | -0.918725252 | 0.165218493 | -5.560668407 | 2.69E-08 | 5.04E-07 |
| IDH2      | 633.7299326 | -0.429021841 | 0.077170386 | -5.559410355 | 2.71E-08 | 5.07E-07 |
| ADAMTS7   | 17.35307895 | -1.488755377 | 0.268068549 | -5.553636862 | 2.80E-08 | 5.24E-07 |
| EXOSC7    | 339.8344228 | 0.434286547  | 0.078235364 | 5.551026066  | 2.84E-08 | 5.31E-07 |
| RUFY3     | 903.9895088 | 0.710205936  | 0.12795412  | 5.550473354  | 2.85E-08 | 5.32E-07 |
| MYCL1     | 68.57439178 | 0.935636185  | 0.168657809 | 5.547541428  | 2.90E-08 | 5.40E-07 |
| SIGLEC1   | 169.9802881 | 1.773613774  | 0.319704048 | 5.547673815  | 2.89E-08 | 5.40E-07 |
| SYNGR2    | 4014.278665 | -0.347736404 | 0.062695877 | -5.54639988  | 2.92E-08 | 5.43E-07 |
| ZNF486    | 78.84266238 | -0.526594029 | 0.094978567 | -5.544345921 | 2.95E-08 | 5.49E-07 |
| SUSD3     | 52.57105815 | 0.64630022   | 0.116601407 | 5.542816643  | 2.98E-08 | 5.54E-07 |
| NAA50     | 1809.654543 | 0.426933021  | 0.077027293 | 5.542620069  | 2.98E-08 | 5.54E-07 |
| ENPP2     | 22.0282952  | 1.960026495  | 0.353905691 | 5.538273464  | 3.05E-08 | 5.67E-07 |
| UGDH      | 359.8020412 | 0.598397259  | 0.108101298 | 5.535523334  | 3.10E-08 | 5.75E-07 |
| USE1      | 348.3007492 | -0.408193228 | 0.073738451 | -5.535690314 | 3.10E-08 | 5.75E-07 |
| ZNF581    | 112.0815188 | -0.749562192 | 0.135434924 | -5.534482332 | 3.12E-08 | 5.78E-07 |
| ABHD15    | 294.6102848 | -0.35194113  | 0.063610557 | -5.532747209 | 3.15E-08 | 5.83E-07 |
| RASAL2    | 732.1396258 | 0.387328427  | 0.070025448 | 5.531252366  | 3.18E-08 | 5.87E-07 |
| HMG20A    | 370.6153198 | -0.455348217 | 0.082333582 | -5.530528436 | 3.19E-08 | 5.89E-07 |
| RCBTB1    | 153.9564403 | -0.461657168 | 0.083486637 | -5.529713335 | 3.21E-08 | 5.91E-07 |
| S100A9    | 420.1008451 | -1.405906305 | 0.254290528 | -5.52874035  | 3.23E-08 | 5.94E-07 |
| C7orf29   | 122.8669917 | 1.007879185  | 0.182534014 | 5.521596578  | 3.36E-08 | 6.18E-07 |
| CORO7     | 143.6846449 | -0.437724225 | 0.07929483  | -5.520211437 | 3.39E-08 | 6.22E-07 |
| DNTTIP1   | 390.0905237 | 0.364801655  | 0.066084704 | 5.520213214  | 3.39E-08 | 6.22E-07 |
| CCDC125   | 369.3746708 | -0.405085845 | 0.073384916 | -5.520015091 | 3.39E-08 | 6.22E-07 |
| TAGLN3    | 22.88625382 | 1.617992282  | 0.293339908 | 5.515759151  | 3.47E-08 | 6.36E-07 |
| SIGLEC15  | 39.17472141 | 1.131819356  | 0.205299792 | 5.513007804  | 3.53E-08 | 6.46E-07 |
| CALM2     | 3232.785435 | -0.584126054 | 0.105979753 | -5.511675948 | 3.55E-08 | 6.50E-07 |
| CUTA      | 504.3156635 | -0.405756363 | 0.07368562  | -5.506588191 | 3.66E-08 | 6.68E-07 |
| TNFSF9    | 24.80378101 | 0.953675142  | 0.173210287 | 5.505880495  | 3.67E-08 | 6.70E-07 |
| TANC2     | 548.7061072 | -0.512958969 | 0.093202046 | -5.503730791 | 3.72E-08 | 6.78E-07 |
| YWHAZ     | 308.0341729 | 0.562291237  | 0.1021707   | 5.503449013  | 3.72E-08 | 6.78E-07 |
| ZSWIM5    | 7.185776399 | 1.991977778  | 0.362098051 | 5.501210997  | 3.77E-08 | 6.86E-07 |

|           |             |              |             |              |          |          |
|-----------|-------------|--------------|-------------|--------------|----------|----------|
| SYT12     | 4.219885329 | 3.621814979  | 0.658462599 | 5.500411088  | 3.79E-08 | 6.89E-07 |
| SLC38A2   | 2972.175078 | 0.448560152  | 0.08161079  | 5.496333904  | 3.88E-08 | 7.04E-07 |
| CYSLTR2   | 54.90396104 | -1.043476043 | 0.190077058 | -5.489752704 | 4.02E-08 | 7.30E-07 |
| AIFM2     | 94.18425342 | 0.937517062  | 0.170791349 | 5.489253797  | 4.04E-08 | 7.32E-07 |
| C20orf160 | 6.839434511 | 2.848817898  | 0.519088968 | 5.488111044  | 4.06E-08 | 7.36E-07 |
| RPS23     | 6931.047679 | -0.506579576 | 0.092340837 | -5.485975568 | 4.11E-08 | 7.44E-07 |
| RGS10     | 656.8219283 | -0.425523712 | 0.077581546 | -5.484857356 | 4.14E-08 | 7.48E-07 |
| RUSC2     | 314.8630963 | 0.662446625  | 0.120798793 | 5.483884468  | 4.16E-08 | 7.51E-07 |
| RPL11     | 18338.05697 | -0.376310877 | 0.068655205 | -5.481170415 | 4.23E-08 | 7.62E-07 |
| GAS2L3    | 309.8011401 | -0.485605106 | 0.088659469 | -5.477193927 | 4.32E-08 | 7.79E-07 |
| EIF2D     | 93.58606728 | -0.465527924 | 0.08506433  | -5.47265725  | 4.43E-08 | 7.98E-07 |
| ZNF295    | 208.3536776 | 0.451705105  | 0.082613491 | 5.467691755  | 4.56E-08 | 8.20E-07 |
| PRSS36    | 20.8626572  | -1.146417186 | 0.209701344 | -5.466904328 | 4.58E-08 | 8.23E-07 |
| YPEL2     | 97.35813278 | -0.603905568 | 0.110476634 | -5.466364676 | 4.59E-08 | 8.25E-07 |
| GADD45G   | 203.1439537 | 0.897418896  | 0.16420051  | 5.465384335  | 4.62E-08 | 8.28E-07 |
| FAM104A   | 338.7338492 | 0.331088105  | 0.060626648 | 5.461098621  | 4.73E-08 | 8.48E-07 |
| ECM1      | 568.0609175 | 0.797791032  | 0.146096123 | 5.460726912  | 4.74E-08 | 8.49E-07 |
| MTHFD1    | 1214.812253 | 0.446561111  | 0.081804898 | 5.458855449  | 4.79E-08 | 8.57E-07 |
| STX6      | 1408.234696 | -0.358272541 | 0.065638399 | -5.458276674 | 4.81E-08 | 8.59E-07 |
| HEXB      | 6747.614524 | -0.309534612 | 0.056734521 | -5.455842522 | 4.87E-08 | 8.70E-07 |
| RBMS2     | 469.3488715 | -0.555018498 | 0.101760745 | -5.45415129  | 4.92E-08 | 8.77E-07 |
| THBS1     | 467.6790905 | -1.414285954 | 0.259549985 | -5.448992634 | 5.07E-08 | 9.02E-07 |
| PRR5L     | 36.33395593 | -1.431279591 | 0.262784541 | -5.446589774 | 5.13E-08 | 9.14E-07 |
| ATAD1     | 626.9420818 | -0.501348221 | 0.092192041 | -5.438085745 | 5.39E-08 | 9.58E-07 |
| LRMP      | 104.270351  | -0.91452545  | 0.168212687 | -5.436721022 | 5.43E-08 | 9.64E-07 |
| NMD3      | 391.1371916 | -0.386986318 | 0.071185698 | -5.436293081 | 5.44E-08 | 9.65E-07 |
| ACVR1B    | 812.9930105 | 0.520745929  | 0.095822545 | 5.43448234   | 5.50E-08 | 9.74E-07 |
| DHRS4     | 785.552167  | 0.463513354  | 0.085354689 | 5.430438076  | 5.62E-08 | 9.95E-07 |
| MAPK3     | 318.4651865 | -0.505267423 | 0.0930447   | -5.43037298  | 5.62E-08 | 9.95E-07 |
| AKIRIN2   | 447.2897627 | 0.387595419  | 0.071380897 | 5.429960084  | 5.64E-08 | 9.97E-07 |
| IPW       | 18.79931431 | -1.020212317 | 0.18816249  | -5.421974997 | 5.89E-08 | 1.04E-06 |
| AFMID     | 32.78829286 | -0.963506103 | 0.177738351 | -5.420924049 | 5.93E-08 | 1.05E-06 |
| ADORA2A   | 23.87031554 | 2.425316866  | 0.447435638 | 5.420482098  | 5.94E-08 | 1.05E-06 |
| SLC7A2    | 45.05771328 | 4.383281162  | 0.808671284 | 5.420349715  | 5.95E-08 | 1.05E-06 |
| N4BP1     | 365.0154737 | 0.644597365  | 0.118926467 | 5.420133826  | 5.96E-08 | 1.05E-06 |
| POLR3D    | 253.31694   | 0.482045982  | 0.08895741  | 5.41884012   | 6.00E-08 | 1.05E-06 |
| FMR1      | 208.2271643 | 0.32706688   | 0.060389363 | 5.415968328  | 6.10E-08 | 1.07E-06 |
| ARL3      | 172.1964839 | -0.449479564 | 0.082996826 | -5.415623507 | 6.11E-08 | 1.07E-06 |
| SLC2A9    | 214.9389045 | -0.587721817 | 0.108620063 | -5.410803525 | 6.27E-08 | 1.10E-06 |
| LOC646329 | 43.38519836 | 1.001707544  | 0.185260026 | 5.407035525  | 6.41E-08 | 1.12E-06 |
| ARRDC1    | 280.5962241 | -0.388092438 | 0.071823511 | -5.40341781  | 6.54E-08 | 1.14E-06 |
| CCNG2     | 260.7124132 | -0.57838381  | 0.10712481  | -5.399158329 | 6.70E-08 | 1.17E-06 |
| PROCR     | 201.5389122 | 0.960884591  | 0.178004269 | 5.398098575  | 6.74E-08 | 1.18E-06 |
| UBTD2     | 530.8945972 | 0.363387996  | 0.067327902 | 5.397286795  | 6.77E-08 | 1.18E-06 |
| OSBPL11   | 1172.279549 | -0.415307463 | 0.076963214 | -5.396181356 | 6.81E-08 | 1.19E-06 |
| SPECC1    | 142.494686  | 0.552985033  | 0.102475652 | 5.396257776  | 6.80E-08 | 1.19E-06 |
| ITGAM     | 1066.250719 | 0.552188283  | 0.102384457 | 5.393282329  | 6.92E-08 | 1.20E-06 |
| CD84      | 3412.992712 | -0.602607202 | 0.111784231 | -5.390806882 | 7.01E-08 | 1.22E-06 |
| SGMS1     | 1002.319619 | 0.425564904  | 0.078990119 | 5.387571369  | 7.14E-08 | 1.24E-06 |

|          |             |              |             |              |          |          |
|----------|-------------|--------------|-------------|--------------|----------|----------|
| CDC42EP3 | 1045.522913 | -0.544968245 | 0.101162807 | -5.387041531 | 7.16E-08 | 1.24E-06 |
| H2AFY    | 2884.382838 | -0.428987199 | 0.07964009  | -5.386573489 | 7.18E-08 | 1.24E-06 |
| RPS27    | 1643.690106 | -0.611618461 | 0.113651281 | -5.381536007 | 7.39E-08 | 1.28E-06 |
| ADAR     | 4938.686473 | 0.573979044  | 0.106699613 | 5.379392003  | 7.47E-08 | 1.29E-06 |
| PBX4     | 41.31608767 | 0.975572643  | 0.181423189 | 5.377331577  | 7.56E-08 | 1.31E-06 |
| RPL3     | 4957.370278 | -0.36534412  | 0.067960701 | -5.375814487 | 7.62E-08 | 1.32E-06 |
| NMI      | 241.054215  | 0.632816007  | 0.117946089 | 5.365298751  | 8.08E-08 | 1.39E-06 |
| MTFP1    | 377.2661726 | 0.704421273  | 0.131320582 | 5.364134544  | 8.13E-08 | 1.40E-06 |
| FAM225A  | 84.8615772  | 0.657710681  | 0.122637675 | 5.363039367  | 8.18E-08 | 1.41E-06 |
| GTF2A1   | 768.7084006 | 0.306416991  | 0.05716763  | 5.359973707  | 8.32E-08 | 1.43E-06 |
| RAI14    | 55.87795849 | 1.227655103  | 0.229059993 | 5.359535231  | 8.34E-08 | 1.43E-06 |
| GPR85    | 60.6612067  | -0.881770502 | 0.164628642 | -5.356118409 | 8.50E-08 | 1.46E-06 |
| NPPC     | 6.118630574 | 2.089221333  | 0.390061215 | 5.356137072  | 8.50E-08 | 1.46E-06 |
| PLCB2    | 2198.188484 | -0.507209728 | 0.094727216 | -5.354424533 | 8.58E-08 | 1.47E-06 |
| SIRPD    | 83.85684061 | -0.690313812 | 0.129001875 | -5.351192064 | 8.74E-08 | 1.50E-06 |
| RPLP0    | 4631.509061 | -0.377677858 | 0.070581506 | -5.350946398 | 8.75E-08 | 1.50E-06 |
| C1orf162 | 212.4172472 | -0.699628253 | 0.130842891 | -5.347086463 | 8.94E-08 | 1.53E-06 |
| ERV3-1   | 236.612832  | -0.754509349 | 0.141159152 | -5.345096913 | 9.04E-08 | 1.54E-06 |
| TNFSF15  | 84.41441699 | 1.057112588  | 0.197905932 | 5.341490144  | 9.22E-08 | 1.57E-06 |
| EGR3     | 17.26473764 | 1.692935525  | 0.317029751 | 5.33998945   | 9.30E-08 | 1.58E-06 |
| KIAA0141 | 268.5855098 | -0.424658448 | 0.079527347 | -5.339778853 | 9.31E-08 | 1.59E-06 |
| HLA-DMA  | 3522.3214   | -0.433901878 | 0.081329574 | -5.335105744 | 9.55E-08 | 1.62E-06 |
| HBEGF    | 3748.358605 | 0.638932531  | 0.119874019 | 5.330033467  | 9.82E-08 | 1.67E-06 |
| ACOT11   | 58.30032708 | -0.615404665 | 0.115470986 | -5.329517716 | 9.85E-08 | 1.67E-06 |
| RAP2B    | 984.5545249 | -0.556731623 | 0.10446119  | -5.329554674 | 9.85E-08 | 1.67E-06 |
| LAD1     | 33.73231792 | 2.544660223  | 0.477533193 | 5.328760934  | 9.89E-08 | 1.67E-06 |
| RBM47    | 4167.022007 | 0.296896793  | 0.05571564  | 5.328787289  | 9.89E-08 | 1.67E-06 |
| SNX21    | 80.21179842 | -0.657563995 | 0.123402518 | -5.328610856 | 9.90E-08 | 1.67E-06 |
| SHC4     | 17.97557575 | 1.289106866  | 0.242047635 | 5.325839542  | 1.00E-07 | 1.70E-06 |
| NARS2    | 150.2185893 | -0.46412034  | 0.087243819 | -5.319807726 | 1.04E-07 | 1.75E-06 |
| SAMM50   | 263.7359246 | -0.488491543 | 0.091840586 | -5.318907052 | 1.04E-07 | 1.76E-06 |
| BAMBI    | 51.46914803 | 0.930266655  | 0.174930765 | 5.317913389  | 1.05E-07 | 1.77E-06 |
| KLF6     | 1527.644219 | 0.49304952   | 0.092791472 | 5.313521901  | 1.08E-07 | 1.81E-06 |
| PPARD    | 897.8943707 | 0.524344184  | 0.098700816 | 5.312460475  | 1.08E-07 | 1.82E-06 |
| PTPN22   | 685.2484261 | -0.607823703 | 0.114498446 | -5.308576018 | 1.10E-07 | 1.86E-06 |
| TEN1     | 144.1437716 | 0.45225384   | 0.085216832 | 5.307095192  | 1.11E-07 | 1.87E-06 |
| CKS2     | 86.62720267 | 0.446916666  | 0.084229662 | 5.305929739  | 1.12E-07 | 1.88E-06 |
| SARDH    | 87.87904143 | 1.061070491  | 0.200037401 | 5.304360513  | 1.13E-07 | 1.90E-06 |
| SLC37A2  | 1220.993446 | -0.455944835 | 0.086059175 | -5.298038662 | 1.17E-07 | 1.96E-06 |
| TOMM34   | 275.1484616 | 0.458517029  | 0.086545575 | 5.297983487  | 1.17E-07 | 1.96E-06 |
| UPP1     | 51.33811855 | 0.838755815  | 0.158468002 | 5.292903316  | 1.20E-07 | 2.01E-06 |
| PCYOX1   | 397.6967742 | -0.564810197 | 0.10690132  | -5.283472603 | 1.27E-07 | 2.12E-06 |
| SLC44A2  | 582.894347  | 0.598412605  | 0.113292868 | 5.281997128  | 1.28E-07 | 2.13E-06 |
| FCRLA    | 18.89494414 | 1.625734493  | 0.307818537 | 5.281470401  | 1.28E-07 | 2.14E-06 |
| SGSH     | 224.549668  | -0.538584575 | 0.102025093 | -5.278942228 | 1.30E-07 | 2.17E-06 |
| XPO6     | 1321.457403 | 0.285999994  | 0.054196102 | 5.277132229  | 1.31E-07 | 2.19E-06 |
| ZFAND2A  | 315.4510361 | 0.564657552  | 0.107083564 | 5.273055287  | 1.34E-07 | 2.23E-06 |
| IL27RA   | 460.3432883 | 0.397716641  | 0.075447534 | 5.271433273  | 1.35E-07 | 2.25E-06 |
| TSPYL2   | 72.81276311 | -0.602386478 | 0.114279281 | -5.271178417 | 1.36E-07 | 2.25E-06 |

|           |             |              |             |              |          |          |
|-----------|-------------|--------------|-------------|--------------|----------|----------|
| CC2D2A    | 5.887236086 | -2.248805031 | 0.426642301 | -5.270937801 | 1.36E-07 | 2.25E-06 |
| PSME1     | 1210.54154  | 0.407644886  | 0.077356019 | 5.269724183  | 1.37E-07 | 2.27E-06 |
| PPARGC1B  | 267.882652  | 0.614928981  | 0.116701132 | 5.269263212  | 1.37E-07 | 2.27E-06 |
| RRAD      | 12.37020387 | 1.786406549  | 0.339087674 | 5.268273334  | 1.38E-07 | 2.28E-06 |
| IFT172    | 81.5681947  | -0.558052107 | 0.105949629 | -5.267145473 | 1.39E-07 | 2.29E-06 |
| TBX20     | 25.87754979 | 1.191372291  | 0.226188486 | 5.267165936  | 1.39E-07 | 2.29E-06 |
| AIM2      | 58.38087575 | 1.678817123  | 0.318865982 | 5.264961519  | 1.40E-07 | 2.31E-06 |
| RBM19     | 349.0975086 | 0.338502782  | 0.064317379 | 5.263006442  | 1.42E-07 | 2.34E-06 |
| WNT5A     | 33.73420838 | 2.295653107  | 0.436269195 | 5.262010552  | 1.42E-07 | 2.35E-06 |
| SPP1      | 5206.372858 | 0.745986975  | 0.141868129 | 5.258312629  | 1.45E-07 | 2.39E-06 |
| TPD52     | 135.0022036 | 0.87219032   | 0.16589108  | 5.257608313  | 1.46E-07 | 2.40E-06 |
| LAMTOR1   | 1879.0226   | -0.285164221 | 0.054253277 | -5.256165856 | 1.47E-07 | 2.42E-06 |
| ZYG11B    | 277.7553939 | -0.354507404 | 0.067453907 | -5.255550374 | 1.48E-07 | 2.42E-06 |
| PIP4K2C   | 557.6431475 | 0.333494508  | 0.063513547 | 5.250761817  | 1.51E-07 | 2.48E-06 |
| DTNA      | 104.3774419 | 0.930706622  | 0.177266626 | 5.250320619  | 1.52E-07 | 2.49E-06 |
| TRIAP1    | 306.8440359 | -0.349182227 | 0.066513024 | -5.249832398 | 1.52E-07 | 2.49E-06 |
| MYL12A    | 8472.234916 | 0.248937127  | 0.047422743 | 5.249319415  | 1.53E-07 | 2.50E-06 |
| SLC25A19  | 672.9991222 | -0.323916298 | 0.061708268 | -5.249155599 | 1.53E-07 | 2.50E-06 |
| PPP1R15A  | 1250.281097 | 0.651903365  | 0.124294538 | 5.244827144  | 1.56E-07 | 2.55E-06 |
| FAM20A    | 88.25990199 | 0.906104251  | 0.172821215 | 5.243015164  | 1.58E-07 | 2.58E-06 |
| GTF2IRD2E | 83.36477082 | -0.774138579 | 0.14771985  | -5.240585992 | 1.60E-07 | 2.61E-06 |
| AGPAT6    | 517.914783  | 0.338443603  | 0.064616595 | 5.237719595  | 1.63E-07 | 2.65E-06 |
| A4GALT    | 299.7828596 | 0.932768152  | 0.178126839 | 5.236539063  | 1.64E-07 | 2.66E-06 |
| CD9       | 8670.900841 | -0.451213103 | 0.08618914  | -5.235150319 | 1.65E-07 | 2.68E-06 |
| FCGR3A    | 5154.728255 | -0.678525999 | 0.129608793 | -5.235184903 | 1.65E-07 | 2.68E-06 |
| DGAT2     | 179.8322778 | 0.783076066  | 0.150011796 | 5.220096596  | 1.79E-07 | 2.90E-06 |
| C19orf59  | 3001.105471 | 0.867128794  | 0.166183987 | 5.217884173  | 1.81E-07 | 2.94E-06 |
| C21orf91  | 139.9264329 | 0.566977017  | 0.108750339 | 5.213565521  | 1.85E-07 | 3.00E-06 |
| PSME4     | 1531.5516   | 0.502924666  | 0.096507392 | 5.211255359  | 1.88E-07 | 3.04E-06 |
| LAMA3     | 9.249102588 | 2.276452756  | 0.436971709 | 5.209611304  | 1.89E-07 | 3.06E-06 |
| DAXX      | 657.6114404 | 0.658912019  | 0.126559197 | 5.206354307  | 1.93E-07 | 3.11E-06 |
| LYL1      | 198.1592471 | -0.513371102 | 0.098610881 | -5.206028959 | 1.93E-07 | 3.11E-06 |
| SLCO4A1   | 35.4709649  | 1.198579995  | 0.230223357 | 5.20616158   | 1.93E-07 | 3.11E-06 |
| CCNI      | 4728.039521 | -0.510227616 | 0.09808775  | -5.201746572 | 1.97E-07 | 3.18E-06 |
| OSCAR     | 373.6982696 | 0.603752499  | 0.116100041 | 5.200278066  | 1.99E-07 | 3.20E-06 |
| GSN       | 6857.040159 | 0.612561041  | 0.117849865 | 5.197808572  | 2.02E-07 | 3.24E-06 |
| AGTRAP    | 1773.454989 | 0.45861993   | 0.088252499 | 5.196679255  | 2.03E-07 | 3.26E-06 |
| STARD8    | 360.9429223 | 0.81546358   | 0.15706275  | 5.19196042   | 2.08E-07 | 3.34E-06 |
| RNF207    | 93.91886777 | 0.959469267  | 0.184884248 | 5.189567405  | 2.11E-07 | 3.38E-06 |
| CD55      | 69.13655728 | 0.932500886  | 0.179784116 | 5.186781262  | 2.14E-07 | 3.43E-06 |
| GAS5      | 102.8143676 | -0.62642094  | 0.120842956 | -5.183760497 | 2.17E-07 | 3.48E-06 |
| ZNF331    | 149.8263732 | -0.681891704 | 0.131601327 | -5.18149566  | 2.20E-07 | 3.52E-06 |
| FAM26F    | 72.43142095 | 1.530860785  | 0.295466602 | 5.181163535  | 2.21E-07 | 3.53E-06 |
| SNHG12    | 170.3013072 | -0.560917645 | 0.108264354 | -5.181000263 | 2.21E-07 | 3.53E-06 |
| POLR2L    | 2555.284869 | -0.386625141 | 0.07465     | -5.179171377 | 2.23E-07 | 3.56E-06 |
| BCL6      | 745.7111297 | 0.378417849  | 0.073074159 | 5.178545365  | 2.24E-07 | 3.57E-06 |
| GATM      | 35.36285947 | -0.784905018 | 0.151637995 | -5.17617644  | 2.26E-07 | 3.61E-06 |
| CASP7     | 50.81553965 | 0.594550601  | 0.114906813 | 5.174198007  | 2.29E-07 | 3.65E-06 |
| TRIM56    | 156.0801433 | 0.578554941  | 0.11191644  | 5.169525932  | 2.35E-07 | 3.73E-06 |

|          |             |              |             |              |          |          |
|----------|-------------|--------------|-------------|--------------|----------|----------|
| PXK      | 405.762142  | -0.501525758 | 0.097065355 | -5.166887376 | 2.38E-07 | 3.78E-06 |
| DNAJC5B  | 267.6745268 | -0.659128731 | 0.127582117 | -5.16630973  | 2.39E-07 | 3.79E-06 |
| FSCN1    | 211.3905773 | 0.668151876  | 0.129394553 | 5.163678538  | 2.42E-07 | 3.84E-06 |
| HMGCS1   | 96.79570449 | 0.702503925  | 0.13605628  | 5.163333318  | 2.43E-07 | 3.85E-06 |
| PLXDC2   | 3918.618169 | -0.418545558 | 0.081113022 | -5.160029162 | 2.47E-07 | 3.91E-06 |
| CES1     | 25574.88286 | -0.435869031 | 0.084482091 | -5.159306837 | 2.48E-07 | 3.92E-06 |
| PLEKHO1  | 403.0621243 | 0.568161501  | 0.110170184 | 5.157125815  | 2.51E-07 | 3.97E-06 |
| RPS10    | 3159.046546 | -0.329707438 | 0.063939169 | -5.15657996  | 2.52E-07 | 3.97E-06 |
| SNURF    | 229.0122654 | -0.54170386  | 0.105059158 | -5.156179335 | 2.52E-07 | 3.98E-06 |
| DIXDC1   | 108.0774035 | 0.615521666  | 0.119422273 | 5.154161369  | 2.55E-07 | 4.02E-06 |
| ABHD2    | 3836.646357 | -0.533180802 | 0.103498428 | -5.151583587 | 2.58E-07 | 4.07E-06 |
| RCN1     | 717.7762646 | 0.468826786  | 0.091057376 | 5.148696452  | 2.62E-07 | 4.13E-06 |
| SH2D4A   | 41.17438625 | 0.819157078  | 0.159289778 | 5.14255897   | 2.71E-07 | 4.27E-06 |
| KCNE3    | 389.7396655 | -0.659642349 | 0.128286305 | -5.141954556 | 2.72E-07 | 4.28E-06 |
| MRO      | 5.523295768 | -3.013156797 | 0.586066395 | -5.141323278 | 2.73E-07 | 4.29E-06 |
| CSNK1E   | 387.2316975 | -0.331191242 | 0.064465553 | -5.137491668 | 2.78E-07 | 4.37E-06 |
| CD97     | 2450.402627 | 0.551897873  | 0.107474613 | 5.135146432  | 2.82E-07 | 4.42E-06 |
| IRF6     | 26.34484966 | 1.130614472  | 0.220172832 | 5.135122544  | 2.82E-07 | 4.42E-06 |
| PADI2    | 279.5798772 | -0.886328031 | 0.172593581 | -5.1353476   | 2.82E-07 | 4.42E-06 |
| TP53INP1 | 36.47606153 | -1.059712362 | 0.206415561 | -5.133878262 | 2.84E-07 | 4.44E-06 |
| TPST2    | 506.1689379 | -0.554953118 | 0.108095195 | -5.133929573 | 2.84E-07 | 4.44E-06 |
| MLLT4    | 279.3421945 | 0.548404369  | 0.106827408 | 5.133554925  | 2.84E-07 | 4.44E-06 |
| ATG2A    | 593.3181109 | 0.569033094  | 0.110866406 | 5.132601594  | 2.86E-07 | 4.46E-06 |
| RPS6KA3  | 1215.205958 | 0.365952792  | 0.071334271 | 5.130111865  | 2.90E-07 | 4.52E-06 |
| HIST1H4F | 100.1034986 | -0.910132556 | 0.177470219 | -5.128367783 | 2.92E-07 | 4.55E-06 |
| ZNF483   | 25.17523726 | -1.004436344 | 0.195963234 | -5.125636704 | 2.97E-07 | 4.62E-06 |
| CD302    | 328.3863432 | -1.323721924 | 0.258504419 | -5.12069361  | 3.04E-07 | 4.73E-06 |
| ENDOG    | 155.8761393 | -0.354531593 | 0.069238067 | -5.120472178 | 3.05E-07 | 4.74E-06 |
| SLC24A4  | 42.70073016 | -1.055433658 | 0.206195318 | -5.118611175 | 3.08E-07 | 4.78E-06 |
| SLC7A1   | 642.3737588 | 0.493963618  | 0.096524004 | 5.117521018  | 3.10E-07 | 4.80E-06 |
| SAMHD1   | 3264.254646 | -0.38954127  | 0.076142819 | -5.115929174 | 3.12E-07 | 4.84E-06 |
| LONRF1   | 189.2527475 | 0.797658128  | 0.155935508 | 5.115307845  | 3.13E-07 | 4.85E-06 |
| PTPMT1   | 1211.741879 | 0.472486335  | 0.092463678 | 5.109966931  | 3.22E-07 | 4.99E-06 |
| CCBL1    | 17.97468465 | -1.106544838 | 0.216681053 | -5.106790947 | 3.28E-07 | 5.07E-06 |
| CLLU1OS  | 61.89922709 | 1.641663928  | 0.322083395 | 5.097015094  | 3.45E-07 | 5.33E-06 |
| HDCC2    | 743.9659961 | -0.370649396 | 0.072775202 | -5.09307274  | 3.52E-07 | 5.44E-06 |
| PCBP2    | 9331.489298 | -0.28578238  | 0.056130741 | -5.091370128 | 3.55E-07 | 5.48E-06 |
| CAMKK1   | 80.24558602 | -0.708786903 | 0.139261258 | -5.089620145 | 3.59E-07 | 5.53E-06 |
| OAT      | 601.2052902 | -0.407208757 | 0.080010632 | -5.089433056 | 3.59E-07 | 5.53E-06 |
| DYRK3    | 92.13421563 | 0.805472169  | 0.158367721 | 5.086088016  | 3.66E-07 | 5.62E-06 |
| VCAM1    | 6.061703486 | 2.721082038  | 0.535052316 | 5.085637343  | 3.66E-07 | 5.63E-06 |
| GSTM2    | 31.42122416 | -1.298161265 | 0.255467747 | -5.081507469 | 3.74E-07 | 5.75E-06 |
| GNLY     | 48.09580017 | 1.335056189  | 0.26293452  | 5.077523447  | 3.82E-07 | 5.87E-06 |
| ANAPC15  | 259.1362933 | -0.768760789 | 0.151517427 | -5.073745017 | 3.90E-07 | 5.98E-06 |
| APBB1IP  | 283.8174165 | -0.620766633 | 0.122359937 | -5.073283349 | 3.91E-07 | 5.99E-06 |
| CR1L     | 21.72930758 | 1.300622068  | 0.256379774 | 5.073029154  | 3.92E-07 | 5.99E-06 |
| SRGN     | 21937.7149  | 0.511434916  | 0.100852425 | 5.071121671  | 3.95E-07 | 6.05E-06 |
| SMPDL3A  | 51.96313272 | -1.146181657 | 0.226235431 | -5.06632252  | 4.06E-07 | 6.20E-06 |
| ZNF528   | 41.74202712 | -0.671746123 | 0.132596603 | -5.066088472 | 4.06E-07 | 6.20E-06 |

|          |             |              |             |              |          |          |
|----------|-------------|--------------|-------------|--------------|----------|----------|
| CD58     | 1135.471211 | 0.343210853  | 0.067760602 | 5.065050247  | 4.08E-07 | 6.23E-06 |
| RPL5     | 3413.434717 | -0.696289709 | 0.137594359 | -5.060452435 | 4.18E-07 | 6.38E-06 |
| NAAA     | 382.8720831 | -0.587214468 | 0.116052833 | -5.05988915  | 4.20E-07 | 6.39E-06 |
| NUP85    | 184.8679782 | -0.418606406 | 0.082730091 | -5.059905084 | 4.19E-07 | 6.39E-06 |
| RFX7     | 149.4377541 | -0.433141847 | 0.085606524 | -5.059682688 | 4.20E-07 | 6.39E-06 |
| IGFBP4   | 14.8577171  | 2.068936281  | 0.408978076 | 5.058795088  | 4.22E-07 | 6.41E-06 |
| EIF4EBP1 | 754.0352683 | -0.372020861 | 0.073551001 | -5.057998622 | 4.24E-07 | 6.43E-06 |
| UBE4B    | 387.1351509 | -0.374261062 | 0.074008923 | -5.056972121 | 4.26E-07 | 6.46E-06 |
| PDCD6IP  | 2735.093898 | 0.495329601  | 0.097982984 | 5.055261427  | 4.30E-07 | 6.52E-06 |
| FFAR2    | 52.06165419 | 1.604469424  | 0.317689537 | 5.050432067  | 4.41E-07 | 6.68E-06 |
| CD38     | 687.8548159 | 0.903575756  | 0.178941557 | 5.04955792   | 4.43E-07 | 6.70E-06 |
| MBP      | 311.8944687 | -0.655055669 | 0.12976457  | -5.04803174  | 4.46E-07 | 6.75E-06 |
| MMP1     | 11.14498608 | 3.102944603  | 0.614977498 | 5.045622989  | 4.52E-07 | 6.83E-06 |
| DLG4     | 166.3852881 | -0.512301126 | 0.101547141 | -5.044958646 | 4.54E-07 | 6.84E-06 |
| SLC2A5   | 10.36355016 | -1.544501392 | 0.306148146 | -5.044947715 | 4.54E-07 | 6.84E-06 |
| TBC1D22B | 285.6584131 | 0.379579343  | 0.075255219 | 5.043893914  | 4.56E-07 | 6.88E-06 |
| ARMC10   | 318.5749235 | -0.34787784  | 0.068990634 | -5.042392299 | 4.60E-07 | 6.92E-06 |
| CPE      | 548.9929109 | -0.610201499 | 0.121011585 | -5.042504818 | 4.59E-07 | 6.92E-06 |
| SH3PXD2B | 430.1864644 | 0.741074716  | 0.147013933 | 5.040846828  | 4.63E-07 | 6.97E-06 |
| SERINC5  | 2111.28725  | -0.293224066 | 0.058243111 | -5.034484971 | 4.79E-07 | 7.20E-06 |
| ZNF318   | 277.2692723 | 0.374783661  | 0.0745181   | 5.029431247  | 4.92E-07 | 7.39E-06 |
| ZFYVE16  | 1436.730218 | 0.382733577  | 0.0761081   | 5.028815293  | 4.94E-07 | 7.40E-06 |
| DOCK10   | 588.4250293 | -0.387504575 | 0.077062489 | -5.028446155 | 4.94E-07 | 7.41E-06 |
| NPAS2    | 48.24262529 | 1.560106677  | 0.310713159 | 5.021051184  | 5.14E-07 | 7.70E-06 |
| LAIR1    | 2482.249951 | -0.420662007 | 0.083782439 | -5.020885169 | 5.14E-07 | 7.70E-06 |
| IL17RA   | 2169.105386 | 0.389001556  | 0.077500164 | 5.019364295  | 5.18E-07 | 7.75E-06 |
| ANXA1    | 16204.0448  | 0.327140278  | 0.065215122 | 5.016325463  | 5.27E-07 | 7.87E-06 |
| LAMTOR4  | 250.3580222 | -0.476907777 | 0.095108034 | -5.0143795   | 5.32E-07 | 7.94E-06 |
| C22orf28 | 1126.904557 | 0.325135424  | 0.064849224 | 5.013713385  | 5.34E-07 | 7.97E-06 |
| LHFP     | 6.492974453 | 2.192455983  | 0.437329868 | 5.013277493  | 5.35E-07 | 7.98E-06 |
| SLAMF1   | 12.95463325 | 2.151317191  | 0.429176634 | 5.012661502  | 5.37E-07 | 8.00E-06 |
| KDM2A    | 1449.885931 | 0.333718076  | 0.066622659 | 5.00907772   | 5.47E-07 | 8.14E-06 |
| LILRB4   | 6684.697409 | 0.551185588  | 0.110044166 | 5.008766988  | 5.48E-07 | 8.15E-06 |
| TEAD3    | 4.171580038 | 2.152715822  | 0.430029683 | 5.005970301  | 5.56E-07 | 8.26E-06 |
| MAPKAPKE | 96.98602138 | -0.517834256 | 0.103466649 | -5.004842252 | 5.59E-07 | 8.30E-06 |
| NANS     | 2203.223351 | -0.229939322 | 0.045982246 | -5.000610875 | 5.71E-07 | 8.48E-06 |
| ZDHHC3   | 383.7814831 | 0.366252545  | 0.073287952 | 4.997445483  | 5.81E-07 | 8.61E-06 |
| CCR4     | 6.139489101 | 2.243935612  | 0.449570548 | 4.991286951  | 6.00E-07 | 8.88E-06 |
| ATN1     | 1238.009465 | 0.348273905  | 0.069779583 | 4.991057444  | 6.00E-07 | 8.89E-06 |
| SLC28A3  | 298.9446388 | 0.811171537  | 0.162676607 | 4.986405556  | 6.15E-07 | 9.10E-06 |
| UBL3     | 1481.972171 | -0.276441648 | 0.0555169   | -4.97941434  | 6.38E-07 | 9.42E-06 |
| KCTD10   | 421.2579343 | -0.343001139 | 0.068900319 | -4.978222779 | 6.42E-07 | 9.48E-06 |
| BATF     | 121.8111453 | -0.856020227 | 0.172069387 | -4.974854868 | 6.53E-07 | 9.63E-06 |
| MT1JP    | 28.3863593  | 2.1677965    | 0.435867004 | 4.973527425  | 6.57E-07 | 9.69E-06 |
| TREML3P  | 64.98249999 | 0.87939023   | 0.176859895 | 4.972242181  | 6.62E-07 | 9.75E-06 |
| FLI1     | 365.6198997 | -0.604263635 | 0.121551867 | -4.97124107  | 6.65E-07 | 9.79E-06 |
| GCNT2    | 145.7292287 | 0.490115278  | 0.098646394 | 4.968405438  | 6.75E-07 | 9.93E-06 |
| ITGAV    | 1385.358147 | 0.518679947  | 0.104415498 | 4.967461328  | 6.78E-07 | 9.97E-06 |
| IGFN1    | 8.985255356 | 3.314752256  | 0.667455086 | 4.966255144  | 6.83E-07 | 1.00E-05 |

|           |             |              |             |              |          |          |
|-----------|-------------|--------------|-------------|--------------|----------|----------|
| TFEC      | 836.4953978 | 0.336808563  | 0.067874417 | 4.962231414  | 6.97E-07 | 1.02E-05 |
| IKZF1     | 528.6202281 | -0.443555691 | 0.089504964 | -4.955654643 | 7.21E-07 | 1.06E-05 |
| SLC46A3   | 462.8943491 | -0.8405352   | 0.1697449   | -4.951755264 | 7.35E-07 | 1.08E-05 |
| POC1A     | 27.75834476 | 0.750581519  | 0.15165926  | 4.949130838  | 7.45E-07 | 1.09E-05 |
| CA2       | 2226.922645 | 0.916809474  | 0.185292481 | 4.94790436   | 7.50E-07 | 1.10E-05 |
| PATZ1     | 22.50262906 | -1.027086402 | 0.207672438 | -4.945703964 | 7.59E-07 | 1.11E-05 |
| RPL15     | 11086.46866 | -0.442796119 | 0.089539399 | -4.945265712 | 7.60E-07 | 1.11E-05 |
| MLLT6     | 827.3932279 | 0.540397872  | 0.109308334 | 4.94379387   | 7.66E-07 | 1.12E-05 |
| ADO       | 519.9242789 | 0.504956324  | 0.102145183 | 4.94351578   | 7.67E-07 | 1.12E-05 |
| SH3RF2    | 6.350180277 | 2.009349556  | 0.406533989 | 4.942636069  | 7.71E-07 | 1.12E-05 |
| PTPRC     | 161.5123657 | 0.570459672  | 0.115425911 | 4.942215024  | 7.72E-07 | 1.12E-05 |
| NINJ1     | 2319.072122 | 0.672277208  | 0.136032737 | 4.942025154  | 7.73E-07 | 1.12E-05 |
| CLIC3     | 8.510036126 | 1.547042092  | 0.313060794 | 4.941666669  | 7.75E-07 | 1.13E-05 |
| ABL2      | 899.7504135 | 0.88636439   | 0.179438601 | 4.939652817  | 7.83E-07 | 1.14E-05 |
| C14orf159 | 52.10351451 | 0.890437217  | 0.180335605 | 4.937667298  | 7.91E-07 | 1.15E-05 |
| LINC00515 | 46.05743962 | 0.995171085  | 0.201546998 | 4.937662644  | 7.91E-07 | 1.15E-05 |
| AKIRIN1   | 1274.270317 | 0.45427852   | 0.092012603 | 4.937133684  | 7.93E-07 | 1.15E-05 |
| POLR1E    | 164.6980964 | -0.373485253 | 0.075658067 | -4.936489498 | 7.95E-07 | 1.15E-05 |
| LRP10     | 1848.374091 | 0.402979193  | 0.081639955 | 4.93605358   | 7.97E-07 | 1.15E-05 |
| ABI1      | 2003.745487 | 0.368468428  | 0.074666826 | 4.934834476  | 8.02E-07 | 1.16E-05 |
| CLDN1     | 9.687171278 | 1.763223941  | 0.357349866 | 4.934167064  | 8.05E-07 | 1.16E-05 |
| SMAD7     | 570.2605052 | 0.466280664  | 0.094518721 | 4.933209603  | 8.09E-07 | 1.17E-05 |
| ANAPC13   | 497.3782255 | -0.384911617 | 0.078085492 | -4.929361499 | 8.25E-07 | 1.19E-05 |
| SESN3     | 42.99324508 | -1.087065885 | 0.22059021  | -4.927987907 | 8.31E-07 | 1.20E-05 |
| MLF2      | 1958.927331 | 0.302221498  | 0.061353432 | 4.925910255  | 8.40E-07 | 1.21E-05 |
| PNRC2     | 2133.274197 | 0.355588122  | 0.072205627 | 4.924659433  | 8.45E-07 | 1.22E-05 |
| ARG2      | 94.48660952 | -0.652866887 | 0.132593379 | -4.923827197 | 8.49E-07 | 1.22E-05 |
| UBR2      | 628.6859169 | 0.20919892   | 0.042489763 | 4.923513442  | 8.50E-07 | 1.22E-05 |
| DUSP2     | 216.2437629 | 0.838616556  | 0.170388358 | 4.921794935  | 8.58E-07 | 1.23E-05 |
| EIF2C1    | 313.0907455 | -0.501623703 | 0.101935118 | -4.921009678 | 8.61E-07 | 1.24E-05 |
| TBCK      | 320.1819356 | -0.311032633 | 0.06321511  | -4.920226098 | 8.64E-07 | 1.24E-05 |
| ABAT      | 184.5596028 | -0.859070077 | 0.174716425 | -4.916939418 | 8.79E-07 | 1.26E-05 |
| ANTXR2    | 188.9951521 | 0.662593592  | 0.134811883 | 4.914949464  | 8.88E-07 | 1.27E-05 |
| FAM40B    | 54.48431652 | 0.898424319  | 0.182950719 | 4.910744936  | 9.07E-07 | 1.30E-05 |
| LOC100491 | 54.50529713 | 0.609898895  | 0.124200014 | 4.910618565  | 9.08E-07 | 1.30E-05 |
| NCF1      | 2924.403966 | 0.731182005  | 0.148897922 | 4.91062597   | 9.08E-07 | 1.30E-05 |
| RGS18     | 17.80712662 | -2.650401036 | 0.539937919 | -4.9087144   | 9.17E-07 | 1.31E-05 |
| LOC100281 | 342.3421757 | -0.411959242 | 0.083995837 | -4.904519751 | 9.37E-07 | 1.34E-05 |
| TTC4      | 650.8907242 | 0.332201838  | 0.067773701 | 4.901633431  | 9.50E-07 | 1.35E-05 |
| PPP1R1A   | 17.71633251 | 1.42304675   | 0.290628625 | 4.896443878  | 9.76E-07 | 1.39E-05 |
| NR3C2     | 45.4575456  | -0.844355443 | 0.17246468  | -4.895816596 | 9.79E-07 | 1.39E-05 |
| SLC35A1   | 329.0527042 | -0.448247268 | 0.091559566 | -4.895690163 | 9.80E-07 | 1.39E-05 |
| EIF3E     | 2511.35524  | -0.368891115 | 0.075386429 | -4.89333584  | 9.91E-07 | 1.41E-05 |
| PTPRJ     | 1426.637884 | 0.529008324  | 0.108118639 | 4.892850381  | 9.94E-07 | 1.41E-05 |
| C1orf122  | 250.3955663 | 0.742041685  | 0.151702383 | 4.891430652  | 1.00E-06 | 1.42E-05 |
| NYNRIN    | 8.232180917 | -1.866590587 | 0.381910982 | -4.887501731 | 1.02E-06 | 1.45E-05 |
| AQP9      | 4732.35787  | 0.338114749  | 0.069223807 | 4.884370909  | 1.04E-06 | 1.47E-05 |
| ATRN      | 351.9451741 | -0.485647302 | 0.09944206  | -4.883721255 | 1.04E-06 | 1.47E-05 |
| TANK      | 700.293835  | 0.526999658  | 0.10791254  | 4.883581254  | 1.04E-06 | 1.47E-05 |

|          |             |              |             |              |          |          |
|----------|-------------|--------------|-------------|--------------|----------|----------|
| A2M      | 1927.374896 | -0.676094093 | 0.138454397 | -4.883153644 | 1.04E-06 | 1.47E-05 |
| SERPINB6 | 1605.874357 | -0.287748746 | 0.05892684  | -4.883152534 | 1.04E-06 | 1.47E-05 |
| MT1L     | 196.3741111 | 0.935993474  | 0.191732722 | 4.881761767  | 1.05E-06 | 1.48E-05 |
| VAMP8    | 4028.328053 | -0.287634043 | 0.05892631  | -4.881249848 | 1.05E-06 | 1.49E-05 |
| IFNGR1   | 1589.809179 | -0.490799629 | 0.100592615 | -4.879082124 | 1.07E-06 | 1.50E-05 |
| VSIG4    | 697.1684689 | -0.674284395 | 0.13832018  | -4.874808542 | 1.09E-06 | 1.53E-05 |
| ESPL1    | 16.05534034 | 1.246844708  | 0.25582799  | 4.873761892  | 1.09E-06 | 1.54E-05 |
| EIF3H    | 1542.933329 | -0.362526549 | 0.074402679 | -4.872493237 | 1.10E-06 | 1.55E-05 |
| C4B      | 18.71323764 | 1.697211516  | 0.348554095 | 4.869291565  | 1.12E-06 | 1.57E-05 |
| SLC22A4  | 18.14044122 | 1.611921022  | 0.331018732 | 4.869576446  | 1.12E-06 | 1.57E-05 |
| SPPL2A   | 2218.088267 | 0.348410566  | 0.071551835 | 4.869344924  | 1.12E-06 | 1.57E-05 |
| TBC1D24  | 212.737805  | -0.376107332 | 0.07724313  | -4.869136335 | 1.12E-06 | 1.57E-05 |
| SCCPDH   | 2252.915704 | -0.311432211 | 0.063964279 | -4.868845779 | 1.12E-06 | 1.57E-05 |
| RAPGEF1  | 87.78636199 | 0.9329149    | 0.191844649 | 4.86286641   | 1.16E-06 | 1.62E-05 |
| RAP1B    | 1959.04284  | 0.351517684  | 0.072316288 | 4.860836932  | 1.17E-06 | 1.63E-05 |
| BPHL     | 134.5420798 | -0.421431769 | 0.086719348 | -4.859720227 | 1.18E-06 | 1.64E-05 |
| RPS8     | 6574.445873 | -0.325666726 | 0.067115113 | -4.852360519 | 1.22E-06 | 1.70E-05 |
| ACPS     | 24922.42612 | -0.638058233 | 0.131546701 | -4.850431272 | 1.23E-06 | 1.72E-05 |
| FMNL3    | 2206.002011 | 0.51868417   | 0.10704403  | 4.845521721  | 1.26E-06 | 1.76E-05 |
| CDYL     | 514.2126264 | 0.360139076  | 0.074327238 | 4.845317642  | 1.26E-06 | 1.76E-05 |
| RELT     | 138.5879927 | 0.48691092   | 0.100536074 | 4.843146334  | 1.28E-06 | 1.78E-05 |
| ATF5     | 1276.497898 | 0.423732178  | 0.087657001 | 4.833979859  | 1.34E-06 | 1.86E-05 |
| CTNNAL1  | 23.11495626 | 1.190274316  | 0.24623963  | 4.833804847  | 1.34E-06 | 1.86E-05 |
| HSDL2    | 476.4107288 | -0.376162788 | 0.077837743 | -4.832652848 | 1.35E-06 | 1.87E-05 |
| GPBP1    | 621.9262142 | 0.277411249  | 0.057405858 | 4.832455405  | 1.35E-06 | 1.87E-05 |
| TLE1     | 108.3414764 | 1.050367097  | 0.217369453 | 4.832174366  | 1.35E-06 | 1.87E-05 |
| TNFRSF18 | 14.8843674  | 2.12661711   | 0.440118857 | 4.831915464  | 1.35E-06 | 1.87E-05 |
| CASD1    | 104.053387  | -0.819925068 | 0.169751933 | -4.830136862 | 1.36E-06 | 1.89E-05 |
| IL36B    | 82.22126213 | 0.734190634  | 0.152021229 | 4.829527014  | 1.37E-06 | 1.89E-05 |
| IFNAR2   | 671.8249449 | -0.333997598 | 0.069219091 | -4.825223687 | 1.40E-06 | 1.93E-05 |
| ST8SIA4  | 36.22661052 | -1.298441481 | 0.269175685 | -4.823769585 | 1.41E-06 | 1.95E-05 |
| WWC3     | 158.2001433 | -0.447047856 | 0.092685648 | -4.823269451 | 1.41E-06 | 1.95E-05 |
| EIF4EBP2 | 2878.692386 | -0.330419487 | 0.068544318 | -4.820523357 | 1.43E-06 | 1.97E-05 |
| GNA14    | 12.70785694 | 2.351039003  | 0.487841064 | 4.819272459  | 1.44E-06 | 1.99E-05 |
| NQO1     | 950.9269467 | 0.692882719  | 0.143866464 | 4.816151713  | 1.46E-06 | 2.02E-05 |
| TMEM38B  | 1014.980893 | 0.618172179  | 0.128391286 | 4.814751819  | 1.47E-06 | 2.03E-05 |
| GAB1     | 137.4439728 | -0.439283034 | 0.091260468 | -4.813508442 | 1.48E-06 | 2.04E-05 |
| ADAT2    | 27.71832516 | -0.718120283 | 0.149330365 | -4.808936773 | 1.52E-06 | 2.08E-05 |
| BAK1     | 787.9494571 | 0.599346468  | 0.124632594 | 4.808906301  | 1.52E-06 | 2.08E-05 |
| SLC7A5   | 277.070375  | 0.903110493  | 0.187831051 | 4.808100077  | 1.52E-06 | 2.09E-05 |
| RTN4RL2  | 101.2027315 | 1.270204548  | 0.264251015 | 4.806810485  | 1.53E-06 | 2.10E-05 |
| FBL      | 349.0018738 | -0.355930224 | 0.074055952 | -4.80623387  | 1.54E-06 | 2.11E-05 |
| PLA2G6   | 99.61162736 | -0.756547405 | 0.157635975 | -4.799332155 | 1.59E-06 | 2.18E-05 |
| LONP1    | 1382.660306 | 0.43409072   | 0.090491218 | 4.797048061  | 1.61E-06 | 2.20E-05 |
| PARL     | 322.1712585 | -0.364096871 | 0.075939226 | -4.794582359 | 1.63E-06 | 2.23E-05 |
| SLC12A9  | 200.9030091 | -0.383545625 | 0.080078962 | -4.789592875 | 1.67E-06 | 2.28E-05 |
| EVI2A    | 1465.685999 | -0.49101931  | 0.102589163 | -4.786268819 | 1.70E-06 | 2.32E-05 |
| JUP      | 169.65454   | 1.107393204  | 0.2315578   | 4.782361908  | 1.73E-06 | 2.36E-05 |
| CD47     | 1353.742016 | 0.406940335  | 0.085103784 | 4.78169493   | 1.74E-06 | 2.37E-05 |

|           |             |              |             |              |          |          |
|-----------|-------------|--------------|-------------|--------------|----------|----------|
| ACACB     | 193.8379155 | -0.663656814 | 0.138818427 | -4.780754446 | 1.75E-06 | 2.38E-05 |
| MED13     | 865.4607048 | 0.296194734  | 0.061960706 | 4.780364071  | 1.75E-06 | 2.38E-05 |
| LNPEP     | 176.6898354 | 0.868337447  | 0.181900297 | 4.773700004  | 1.81E-06 | 2.46E-05 |
| LAT       | 157.5986459 | 0.678649645  | 0.142242735 | 4.771067184  | 1.83E-06 | 2.49E-05 |
| CARD11    | 39.12182689 | 0.915231619  | 0.191985563 | 4.76718981   | 1.87E-06 | 2.54E-05 |
| TCN2      | 691.7704443 | -0.619766242 | 0.130078152 | -4.764568333 | 1.89E-06 | 2.57E-05 |
| PCK2      | 706.2306951 | 0.390545637  | 0.081973335 | 4.764300954  | 1.90E-06 | 2.57E-05 |
| LRP1      | 7549.262783 | -0.696842082 | 0.146425254 | -4.759029339 | 1.95E-06 | 2.64E-05 |
| COMMD9    | 475.8503834 | -0.343367085 | 0.072178057 | -4.757222644 | 1.96E-06 | 2.66E-05 |
| KIAA0754  | 135.2399251 | -0.611835653 | 0.128686626 | -4.754461832 | 1.99E-06 | 2.69E-05 |
| LTA4H     | 8527.550289 | -0.419358767 | 0.08821408  | -4.753875644 | 2.00E-06 | 2.70E-05 |
| TRHDE-AS1 | 19.38416899 | -1.107284193 | 0.23305486  | -4.751174015 | 2.02E-06 | 2.73E-05 |
| IL28RA    | 176.9412631 | 0.66151967   | 0.139242152 | 4.750857854  | 2.03E-06 | 2.74E-05 |
| NCKAP5L   | 321.4363598 | -0.397832542 | 0.083754102 | -4.750006636 | 2.03E-06 | 2.74E-05 |
| PIGF      | 214.4958702 | -0.446103443 | 0.093915857 | -4.750033246 | 2.03E-06 | 2.74E-05 |
| TMBIM1    | 4513.960595 | 0.311957425  | 0.065779326 | 4.742484322  | 2.11E-06 | 2.84E-05 |
| PTPN1     | 951.4231636 | 0.439555999  | 0.092746877 | 4.739307796  | 2.14E-06 | 2.89E-05 |
| TAPBPL    | 714.7008561 | 0.351700058  | 0.074216311 | 4.738851213  | 2.15E-06 | 2.89E-05 |
| C17orf49  | 662.6035687 | 0.414342312  | 0.087465312 | 4.737218698  | 2.17E-06 | 2.91E-05 |
| SOCS2     | 4.768618486 | 2.46791832   | 0.521035163 | 4.736567689  | 2.17E-06 | 2.92E-05 |
| ZNF671    | 59.47165787 | -0.532749351 | 0.112482924 | -4.736268685 | 2.18E-06 | 2.92E-05 |
| UBXN4     | 1406.835189 | 0.238060934  | 0.050274122 | 4.735257924  | 2.19E-06 | 2.93E-05 |
| ZMAT3     | 215.6000576 | -0.553372222 | 0.116963668 | -4.731146258 | 2.23E-06 | 2.99E-05 |
| BNC2      | 6.281067756 | -2.127583797 | 0.450076822 | -4.727156995 | 2.28E-06 | 3.05E-05 |
| DHRS1     | 117.951239  | -0.56876703  | 0.120316511 | -4.72725669  | 2.28E-06 | 3.05E-05 |
| RPL32     | 4616.477363 | -0.433648162 | 0.091819124 | -4.722852308 | 2.33E-06 | 3.11E-05 |
| PSMB7     | 1282.808191 | 0.538878009  | 0.114104572 | 4.722667995  | 2.33E-06 | 3.11E-05 |
| ITGA2     | 9.129615464 | 1.953451833  | 0.413979734 | 4.718713681  | 2.37E-06 | 3.17E-05 |
| RHBDF2    | 511.7496306 | 0.741020708  | 0.15717619  | 4.714586273  | 2.42E-06 | 3.23E-05 |
| MLPH      | 494.3493027 | -0.514462028 | 0.109185813 | -4.711802884 | 2.46E-06 | 3.28E-05 |
| TNKS1BP1  | 43.23447373 | 0.849810229  | 0.180384579 | 4.711102434  | 2.46E-06 | 3.28E-05 |
| KIAA0196  | 492.7452439 | -0.266996122 | 0.056705934 | -4.708433567 | 2.50E-06 | 3.32E-05 |
| G6PD      | 5809.005016 | 0.472617593  | 0.100382914 | 4.708147762  | 2.50E-06 | 3.33E-05 |
| SDF4      | 2754.860302 | 0.312230945  | 0.066328583 | 4.707336245  | 2.51E-06 | 3.34E-05 |
| DNAJA1    | 6891.58394  | 0.350121721  | 0.074416779 | 4.704876067  | 2.54E-06 | 3.38E-05 |
| RPLP1     | 6571.005089 | -0.275816586 | 0.058646664 | -4.703022603 | 2.56E-06 | 3.40E-05 |
| GALNT4    | 224.1337889 | 0.378483055  | 0.080495863 | 4.701894517  | 2.58E-06 | 3.42E-05 |
| DHRS9     | 457.9453982 | 1.042399607  | 0.221814845 | 4.699413176  | 2.61E-06 | 3.46E-05 |
| TMEM194   | 77.96903127 | 1.355397473  | 0.288530268 | 4.697591985  | 2.63E-06 | 3.49E-05 |
| CENPT     | 3.691860109 | 1.934700505  | 0.411979129 | 4.696112902  | 2.65E-06 | 3.51E-05 |
| PCNXL2    | 75.94463446 | 0.627022315  | 0.133588821 | 4.693673558  | 2.68E-06 | 3.55E-05 |
| DHRS3     | 3117.580419 | -0.461153289 | 0.098269998 | -4.692716993 | 2.70E-06 | 3.57E-05 |
| SPTSSA    | 452.0784749 | -0.432701608 | 0.092241945 | -4.690941909 | 2.72E-06 | 3.59E-05 |
| ZNF480    | 29.67320442 | -0.836143551 | 0.178257393 | -4.690652862 | 2.72E-06 | 3.60E-05 |
| OR2A4     | 106.4277769 | 0.967084741  | 0.20626794  | 4.688487908  | 2.75E-06 | 3.63E-05 |
| IFT20     | 239.360952  | -0.309891687 | 0.066107029 | -4.687726751 | 2.76E-06 | 3.64E-05 |
| PDGFB     | 81.82243695 | 0.766381057  | 0.163599333 | 4.684499891  | 2.81E-06 | 3.70E-05 |
| SAT2      | 439.0356642 | -0.370230093 | 0.079036644 | -4.684284093 | 2.81E-06 | 3.70E-05 |
| FTO       | 603.9342533 | -0.244650109 | 0.052229703 | -4.684118359 | 2.81E-06 | 3.70E-05 |

|          |             |              |             |              |          |          |
|----------|-------------|--------------|-------------|--------------|----------|----------|
| PVR      | 527.9437898 | 0.516233819  | 0.110230679 | 4.683213623  | 2.82E-06 | 3.71E-05 |
| PEA15    | 2119.148845 | 0.451079987  | 0.096344744 | 4.68193664   | 2.84E-06 | 3.73E-05 |
| CD244    | 8.103218318 | -2.281956754 | 0.487734109 | -4.678690118 | 2.89E-06 | 3.79E-05 |
| SERTAD2  | 253.4122351 | 0.536218085  | 0.114651955 | 4.67692054   | 2.91E-06 | 3.82E-05 |
| ACP2     | 1563.798196 | 0.598604466  | 0.128017228 | 4.675968042  | 2.93E-06 | 3.84E-05 |
| CYP27A1  | 24341.26651 | -0.371019218 | 0.079432731 | -4.670860672 | 3.00E-06 | 3.93E-05 |
| FAM161B  | 50.10762361 | -0.615599262 | 0.131807343 | -4.67044739  | 3.01E-06 | 3.94E-05 |
| LSMD1    | 404.7895968 | -0.530040996 | 0.113499711 | -4.669976623 | 3.01E-06 | 3.94E-05 |
| ACAT2    | 178.0901321 | 0.52170211   | 0.111760397 | 4.668040935  | 3.04E-06 | 3.98E-05 |
| ZNF326   | 80.34964828 | 0.536945314  | 0.115051381 | 4.667004515  | 3.06E-06 | 3.99E-05 |
| MCTP1    | 347.3555612 | 0.690922657  | 0.148146501 | 4.663779777  | 3.10E-06 | 4.05E-05 |
| PLS1     | 24.8812727  | 0.814709556  | 0.174707084 | 4.663288627  | 3.11E-06 | 4.06E-05 |
| ID2      | 337.2204616 | -0.501068722 | 0.107459556 | -4.662858676 | 3.12E-06 | 4.07E-05 |
| DNAJB9   | 368.5667661 | 0.390396722  | 0.083729899 | 4.662572471  | 3.12E-06 | 4.07E-05 |
| SWI5     | 48.72559118 | -0.502371092 | 0.107761191 | -4.661892549 | 3.13E-06 | 4.08E-05 |
| CDC42EP1 | 673.6576702 | 0.797311544  | 0.171239993 | 4.656105919  | 3.22E-06 | 4.19E-05 |
| QSOX1    | 3035.387802 | 0.394183048  | 0.084693575 | 4.654226104  | 3.25E-06 | 4.23E-05 |
| DNAH1    | 112.2516091 | -0.969388787 | 0.208411661 | -4.651317412 | 3.30E-06 | 4.28E-05 |
| GRIPAP1  | 338.5203127 | 0.398655141  | 0.085707059 | 4.651368824  | 3.30E-06 | 4.28E-05 |
| JUND     | 1275.968444 | 0.464478894  | 0.099904929 | 4.649209011  | 3.33E-06 | 4.32E-05 |
| PCCA     | 510.3636565 | -0.414574167 | 0.089201441 | -4.647617384 | 3.36E-06 | 4.35E-05 |
| LMTK2    | 144.6323478 | 0.590693211  | 0.127111659 | 4.647041934  | 3.37E-06 | 4.36E-05 |
| SATB1    | 81.95566291 | -0.909628054 | 0.195914881 | -4.642975811 | 3.43E-06 | 4.45E-05 |
| FAS      | 175.7647411 | 0.69593594   | 0.149897376 | 4.642749307  | 3.44E-06 | 4.45E-05 |
| UNC119   | 257.2355274 | -0.308312413 | 0.066433136 | -4.64094321  | 3.47E-06 | 4.48E-05 |
| PALD1    | 7.110565571 | -2.069874232 | 0.446081227 | -4.640128538 | 3.48E-06 | 4.50E-05 |
| CBX7     | 66.36558001 | -0.964880031 | 0.208003357 | -4.63877143  | 3.50E-06 | 4.53E-05 |
| ARMC2    | 11.926194   | -0.963772783 | 0.207776586 | -4.638505246 | 3.51E-06 | 4.53E-05 |
| TFAP4    | 52.68975464 | -0.831986951 | 0.179389858 | -4.637870602 | 3.52E-06 | 4.54E-05 |
| GUCY1B3  | 12.50143858 | 2.253245986  | 0.485852749 | 4.637713777  | 3.52E-06 | 4.54E-05 |
| EEF1G    | 7651.158325 | -0.349675433 | 0.075421418 | -4.636288239 | 3.55E-06 | 4.57E-05 |
| PILRA    | 2429.928353 | 0.419230503  | 0.090441898 | 4.635357186  | 3.56E-06 | 4.59E-05 |
| CLEC7A   | 227.2161288 | -0.39396875  | 0.085011869 | -4.634279365 | 3.58E-06 | 4.61E-05 |
| HLX      | 193.4224904 | 0.475122465  | 0.102526147 | 4.634158992  | 3.58E-06 | 4.61E-05 |
| AGTPBP1  | 148.9822232 | -0.49864667  | 0.107611934 | -4.633748801 | 3.59E-06 | 4.61E-05 |
| ACN9     | 93.33904608 | -0.416503703 | 0.089921749 | -4.631846126 | 3.62E-06 | 4.65E-05 |
| RAPGEF2  | 145.2498641 | 0.608306393  | 0.131338525 | 4.631591468  | 3.63E-06 | 4.65E-05 |
| TIRAP    | 43.69314438 | 0.591181141  | 0.127684568 | 4.630012454  | 3.66E-06 | 4.69E-05 |
| SCN1B    | 29.27962804 | 1.818998827  | 0.393350287 | 4.624373965  | 3.76E-06 | 4.81E-05 |
| MMD      | 651.8312036 | -0.548972615 | 0.118880415 | -4.61785581  | 3.88E-06 | 4.96E-05 |
| LILRA1   | 21.33630586 | -1.367166529 | 0.296124989 | -4.616856325 | 3.90E-06 | 4.98E-05 |
| C6orf228 | 151.3590977 | 0.402428727  | 0.08724668  | 4.612539134  | 3.98E-06 | 5.08E-05 |
| SLC31A2  | 93.89329248 | 0.419504436  | 0.090960453 | 4.611943125  | 3.99E-06 | 5.09E-05 |
| FAM135A  | 141.6503818 | -0.42366962  | 0.091871214 | -4.611560055 | 4.00E-06 | 5.10E-05 |
| OTUD1    | 541.5400358 | 0.616427257  | 0.133678828 | 4.611255682  | 4.00E-06 | 5.10E-05 |
| RCOR1    | 530.1543396 | -0.312187368 | 0.067746232 | -4.608187942 | 4.06E-06 | 5.18E-05 |
| GLS      | 2416.167976 | 0.364919937  | 0.079230147 | 4.605821768  | 4.11E-06 | 5.23E-05 |
| CD300A   | 721.1459133 | -0.599578418 | 0.130240926 | -4.603609893 | 4.15E-06 | 5.28E-05 |
| CD83     | 4697.583219 | 0.525923364  | 0.114243747 | 4.6035199    | 4.15E-06 | 5.28E-05 |

|          |             |              |             |              |          |          |
|----------|-------------|--------------|-------------|--------------|----------|----------|
| PDPN     | 13.12130084 | 1.277981636  | 0.277599519 | 4.603688226  | 4.15E-06 | 5.28E-05 |
| DPY19L1  | 510.4446697 | -0.358422482 | 0.077875112 | -4.602529284 | 4.17E-06 | 5.30E-05 |
| CTSL1    | 17609.60167 | 0.34537967   | 0.075061202 | 4.601307459  | 4.20E-06 | 5.33E-05 |
| TMED5    | 2532.765092 | 0.315470671  | 0.068592062 | 4.599229996  | 4.24E-06 | 5.38E-05 |
| ANAPC1   | 215.5148764 | -0.327419952 | 0.071202    | -4.59846564  | 4.26E-06 | 5.39E-05 |
| CEACAM21 | 124.1224446 | -0.616685386 | 0.134104403 | -4.598546912 | 4.25E-06 | 5.39E-05 |
| SHKBP1   | 1237.59177  | 0.297725538  | 0.064752927 | 4.597869958  | 4.27E-06 | 5.40E-05 |
| NDRG4    | 10.0044457  | 1.479753758  | 0.321859375 | 4.597516403  | 4.28E-06 | 5.41E-05 |
| ADPRHL2  | 191.5154113 | 0.447522001  | 0.097367153 | 4.596231757  | 4.30E-06 | 5.44E-05 |
| DYX1C1   | 114.2627162 | -0.788918908 | 0.171751733 | -4.593367971 | 4.36E-06 | 5.51E-05 |
| PLCD1    | 183.2375469 | 0.586238179  | 0.12767327  | 4.591706475  | 4.40E-06 | 5.55E-05 |
| DAGLB    | 144.6888857 | -0.45337055  | 0.098759781 | -4.590639498 | 4.42E-06 | 5.57E-05 |
| LGMN     | 4892.703659 | -0.537609571 | 0.117138278 | -4.58952939  | 4.44E-06 | 5.60E-05 |
| TBK1     | 781.3245463 | 0.49369818   | 0.107640642 | 4.586540666  | 4.51E-06 | 5.68E-05 |
| HMBOX1   | 167.4596508 | -0.423373489 | 0.092321199 | -4.585875119 | 4.52E-06 | 5.69E-05 |
| SHMT1    | 77.46120703 | -0.672612999 | 0.146677067 | -4.585672539 | 4.53E-06 | 5.69E-05 |
| ASPHD1   | 43.86706971 | 0.764178559  | 0.166675446 | 4.584829839  | 4.54E-06 | 5.71E-05 |
| C5orf15  | 851.7754586 | 0.480017936  | 0.10469954  | 4.584718694  | 4.55E-06 | 5.71E-05 |
| NCF4     | 1399.722749 | -0.59998719  | 0.130981094 | -4.580715965 | 4.63E-06 | 5.82E-05 |
| TNIP2    | 372.3447838 | 0.607096486  | 0.13256555  | 4.579594685  | 4.66E-06 | 5.85E-05 |
| INO80D   | 253.6027826 | 0.45311201   | 0.098980013 | 4.577813204  | 4.70E-06 | 5.89E-05 |
| RNF19B   | 862.4051581 | 1.092274568  | 0.238644736 | 4.576989992  | 4.72E-06 | 5.91E-05 |
| TSFM     | 222.6273426 | 0.525314316  | 0.114821501 | 4.575051799  | 4.76E-06 | 5.96E-05 |
| POC1B    | 168.8725805 | 0.424489037  | 0.092814925 | 4.573499749  | 4.80E-06 | 6.00E-05 |
| ADRM1    | 1577.180817 | 0.442901773  | 0.096868838 | 4.572180098  | 4.83E-06 | 6.03E-05 |
| CKAP2    | 51.06617808 | -0.734570965 | 0.160660004 | -4.57220807  | 4.83E-06 | 6.03E-05 |
| ENPP5    | 19.82031784 | -1.461718484 | 0.319709923 | -4.572014756 | 4.83E-06 | 6.03E-05 |
| HAGHL    | 116.7250126 | -0.342633992 | 0.074975362 | -4.569954479 | 4.88E-06 | 6.09E-05 |
| CNST     | 120.3801834 | -0.28345184  | 0.062044572 | -4.568519522 | 4.91E-06 | 6.13E-05 |
| SLC16A6  | 472.0147792 | 0.723210701  | 0.158322697 | 4.567953383  | 4.93E-06 | 6.14E-05 |
| MS4A4A   | 3457.851855 | -0.383331221 | 0.083943238 | -4.566552695 | 4.96E-06 | 6.18E-05 |
| PPHLN1   | 112.5738526 | -0.352420493 | 0.077227805 | -4.56338872  | 5.03E-06 | 6.27E-05 |
| SP140    | 45.26530284 | 0.940463248  | 0.206217077 | 4.560549784  | 5.10E-06 | 6.35E-05 |
| CHURC1   | 11.58337343 | 1.053068119  | 0.23091868  | 4.560341838  | 5.11E-06 | 6.35E-05 |
| C17orf89 | 87.48225223 | -0.589260757 | 0.12922698  | -4.559889553 | 5.12E-06 | 6.36E-05 |
| RIN2     | 546.8484787 | 0.570080676  | 0.125038142 | 4.559254227  | 5.13E-06 | 6.37E-05 |
| BTN2A2   | 296.4211096 | 0.257730943  | 0.056540962 | 4.55830489   | 5.16E-06 | 6.38E-05 |
| CRYZ     | 276.1465336 | -0.46305174  | 0.10158116  | -4.558441148 | 5.15E-06 | 6.38E-05 |
| IGSF6    | 2503.782937 | 0.553665756  | 0.121459701 | 4.558431752  | 5.15E-06 | 6.38E-05 |
| PCMTD2   | 221.1388279 | -0.416570293 | 0.09137911  | -4.558703784 | 5.15E-06 | 6.38E-05 |
| P2RY11   | 43.72333518 | -0.994917013 | 0.218323529 | -4.557076463 | 5.19E-06 | 6.42E-05 |
| CRISPLD2 | 30.79144744 | 2.32931069   | 0.511348998 | 4.555226858  | 5.23E-06 | 6.47E-05 |
| RILPL2   | 601.1748572 | 0.420273687  | 0.092273843 | 4.554635136  | 5.25E-06 | 6.48E-05 |
| SLC25A6  | 2228.512262 | -0.297928733 | 0.065416661 | -4.554324997 | 5.26E-06 | 6.49E-05 |
| AICDA    | 27.16045542 | -1.150947529 | 0.252822423 | -4.552394975 | 5.30E-06 | 6.55E-05 |
| TCTEX1D4 | 68.89675351 | 1.16723285   | 0.256520296 | 4.550255353  | 5.36E-06 | 6.61E-05 |
| MANSC4   | 10.20399329 | -2.652593698 | 0.583202525 | -4.548323409 | 5.41E-06 | 6.66E-05 |
| RPSAP58  | 24.93514599 | -0.745905536 | 0.164138405 | -4.544369339 | 5.51E-06 | 6.79E-05 |
| HIATL1   | 2148.754979 | 0.280144897  | 0.061670793 | 4.542586299  | 5.56E-06 | 6.84E-05 |

|         |             |              |             |              |          |          |
|---------|-------------|--------------|-------------|--------------|----------|----------|
| CYB5R1  | 1052.676224 | -0.259830266 | 0.057261474 | -4.537610474 | 5.69E-06 | 7.00E-05 |
| CSF2RA  | 610.5701357 | 0.44989022   | 0.099157521 | 4.537126524  | 5.70E-06 | 7.01E-05 |
| INPP4A  | 354.9103085 | -0.34859563  | 0.076881301 | -4.53420564  | 5.78E-06 | 7.10E-05 |
| ZBED3   | 25.27325387 | -0.888893456 | 0.196089973 | -4.533089804 | 5.81E-06 | 7.14E-05 |
| SEMA4A  | 768.3067274 | 0.817476418  | 0.180348362 | 4.532763199  | 5.82E-06 | 7.14E-05 |
| RAC2    | 7787.713528 | 0.668628906  | 0.147559272 | 4.531256479  | 5.86E-06 | 7.19E-05 |
| TPM4    | 6347.77636  | 0.533324411  | 0.117703788 | 4.531072622  | 5.87E-06 | 7.19E-05 |
| ACPL2   | 15.1168817  | 1.171115073  | 0.258474215 | 4.530877766  | 5.87E-06 | 7.19E-05 |
| LPCAT2  | 1473.661586 | -0.357349571 | 0.078917045 | -4.528167136 | 5.95E-06 | 7.28E-05 |
| ANKRD5  | 7.463124656 | -1.59316284  | 0.352011273 | -4.525885856 | 6.01E-06 | 7.35E-05 |
| AKAP5   | 47.37777989 | 1.156687701  | 0.255631563 | 4.524823493  | 6.04E-06 | 7.39E-05 |
| SLC40A1 | 5.872546046 | -1.890119048 | 0.417808947 | -4.523883607 | 6.07E-06 | 7.41E-05 |
| DPYSL3  | 188.2277389 | 0.762531709  | 0.168658748 | 4.521151257  | 6.15E-06 | 7.51E-05 |
| TIMP3   | 478.5821816 | -0.680568934 | 0.150535779 | -4.52097794  | 6.16E-06 | 7.51E-05 |
| NFKBIB  | 659.8030315 | 0.449841069  | 0.099529455 | 4.519677808  | 6.19E-06 | 7.55E-05 |
| TRIP4   | 379.5869735 | 0.360531117  | 0.079781357 | 4.518989509  | 6.21E-06 | 7.57E-05 |
| OGDH    | 1776.975955 | 0.437588889  | 0.096860474 | 4.517724024  | 6.25E-06 | 7.61E-05 |
| ARHGEF2 | 1036.720614 | 0.328399502  | 0.07273505  | 4.515010333  | 6.33E-06 | 7.70E-05 |
| CD1D    | 12.18541146 | -1.639743515 | 0.363204029 | -4.514662237 | 6.34E-06 | 7.71E-05 |
| TMEM217 | 5.497673022 | 2.224236183  | 0.493289815 | 4.508984611  | 6.51E-06 | 7.91E-05 |
| CHI3L2  | 18.51869959 | 1.357776118  | 0.301301865 | 4.506364802  | 6.59E-06 | 8.01E-05 |
| KCNQ1   | 255.4976857 | -0.904247982 | 0.200681203 | -4.505892779 | 6.61E-06 | 8.02E-05 |
| MDFIC   | 1338.214492 | -0.29471989  | 0.065426584 | -4.504589283 | 6.65E-06 | 8.06E-05 |
| POLR2J  | 511.7692941 | -0.275115822 | 0.061153124 | -4.498802446 | 6.83E-06 | 8.28E-05 |
| HIVEP2  | 68.39776808 | 0.529282246  | 0.117662785 | 4.498297805  | 6.85E-06 | 8.29E-05 |
| MRC1    | 5904.185002 | 0.628668177  | 0.139781673 | 4.497500726  | 6.88E-06 | 8.32E-05 |
| DGKH    | 191.7525156 | 0.450251283  | 0.100202272 | 4.4934239    | 7.01E-06 | 8.48E-05 |
| TXNRD1  | 5.295821806 | 1.803490191  | 0.401442818 | 4.492520758  | 7.04E-06 | 8.50E-05 |
| YPEL3   | 297.0092714 | -0.492982369 | 0.109732789 | -4.492571228 | 7.04E-06 | 8.50E-05 |
| TIGIT   | 7.810376338 | 1.654427984  | 0.368284749 | 4.492252228  | 7.05E-06 | 8.51E-05 |
| AKAP12  | 13.67761417 | 1.388981475  | 0.309308915 | 4.490596323  | 7.10E-06 | 8.57E-05 |
| GYPC    | 1358.511294 | 0.427832398  | 0.095309375 | 4.488880555  | 7.16E-06 | 8.63E-05 |
| FUNDC2  | 207.2393871 | 0.389336722  | 0.086753623 | 4.487843935  | 7.19E-06 | 8.67E-05 |
| ARRB1   | 712.3795833 | -0.42569621  | 0.094867641 | -4.487264622 | 7.21E-06 | 8.68E-05 |
| SYNDIG1 | 9.234223299 | -3.37127089  | 0.751613194 | -4.485380136 | 7.28E-06 | 8.76E-05 |
| MPV17L  | 105.5361393 | -0.784145724 | 0.174865137 | -4.484288515 | 7.32E-06 | 8.79E-05 |
| RBP4    | 3117.792944 | -0.527752836 | 0.117893904 | -4.476506561 | 7.59E-06 | 9.11E-05 |
| TACC3   | 152.1999433 | -0.380468817 | 0.08499245  | -4.476501329 | 7.59E-06 | 9.11E-05 |
| ACBD6   | 133.1054197 | -0.527442565 | 0.117893314 | -4.473897183 | 7.68E-06 | 9.22E-05 |
| MYO1B   | 11.15821587 | 1.313846837  | 0.293688251 | 4.473610474  | 7.69E-06 | 9.22E-05 |
| MOB3B   | 233.8614117 | 0.741402465  | 0.165744611 | 4.473161812  | 7.71E-06 | 9.24E-05 |
| CTSA    | 8392.921502 | -0.412761385 | 0.092288027 | -4.472534527 | 7.73E-06 | 9.26E-05 |
| LMNB1   | 60.68315101 | 0.903408817  | 0.202019093 | 4.471898185  | 7.75E-06 | 9.27E-05 |
| SRC     | 693.7387687 | 0.355513329  | 0.079498883 | 4.471928594  | 7.75E-06 | 9.27E-05 |
| CCL13   | 4.008231947 | 1.840013505  | 0.411593583 | 4.470462081  | 7.81E-06 | 9.33E-05 |
| ZC3HAV1 | 1144.88529  | 0.483462574  | 0.108155356 | 4.47007519   | 7.82E-06 | 9.34E-05 |
| ADCY3   | 1720.538147 | -0.339950043 | 0.076061807 | -4.469392145 | 7.84E-06 | 9.36E-05 |
| INPP5K  | 655.8156327 | 0.243365876  | 0.054450404 | 4.46949621   | 7.84E-06 | 9.36E-05 |
| ENO1    | 13911.8223  | 0.192223729  | 0.043040434 | 4.466119667  | 7.97E-06 | 9.50E-05 |

|          |             |              |             |              |          |             |
|----------|-------------|--------------|-------------|--------------|----------|-------------|
| FHIT     | 87.13099302 | -0.599475689 | 0.134266177 | -4.464830237 | 8.01E-06 | 9.55E-05    |
| KIAA1586 | 86.65252505 | -0.565253461 | 0.126867177 | -4.455474419 | 8.37E-06 | 9.97E-05    |
| FTSJ2    | 330.0796178 | -0.377466821 | 0.084726929 | -4.455098578 | 8.39E-06 | 9.98E-05    |
| PSD3     | 25.6385483  | 1.081001441  | 0.242777207 | 4.452647993  | 8.48E-06 | 0.000100861 |
| SEMA7A   | 363.7254834 | 0.610563937  | 0.137261534 | 4.44817947   | 8.66E-06 | 0.000102916 |
| MYLIP    | 10.78130016 | -1.119485697 | 0.251734865 | -4.447082437 | 8.70E-06 | 0.000103377 |
| KLF5     | 35.30714229 | 0.786880894  | 0.176964138 | 4.446555688  | 8.73E-06 | 0.000103565 |
| LGALS2   | 94.6085907  | 1.087683759  | 0.244680639 | 4.445320094  | 8.78E-06 | 0.000104095 |
| LOC28299 | 61.80573052 | -0.658826783 | 0.148272372 | -4.443354978 | 8.86E-06 | 0.000104984 |
| JPH4     | 11.31263684 | -1.541713496 | 0.34709384  | -4.44177717  | 8.92E-06 | 0.00010569  |
| NDUFB3   | 50.68753101 | 0.825565521  | 0.185953533 | 4.439633416  | 9.01E-06 | 0.000106681 |
| SLC35E2B | 237.7140893 | -0.294487348 | 0.066362838 | -4.437533972 | 9.10E-06 | 0.000107658 |
| TIFAB    | 42.1498536  | -1.016747432 | 0.229215614 | -4.435768631 | 9.17E-06 | 0.000108475 |
| RNF24    | 61.41467527 | 0.56512772   | 0.127409761 | 4.435513536  | 9.19E-06 | 0.000108535 |
| FN3K     | 69.13938541 | -0.630503356 | 0.142156198 | -4.435285742 | 9.20E-06 | 0.000108581 |
| BRCA2    | 53.38722163 | 0.683210236  | 0.154064825 | 4.434563416  | 9.23E-06 | 0.000108876 |
| IL10     | 63.77972544 | -0.981555913 | 0.221530188 | -4.430799803 | 9.39E-06 | 0.000110724 |
| PGAM1    | 3517.713381 | 0.250872349  | 0.056628266 | 4.430161235  | 9.42E-06 | 0.000110982 |
| SMIM3    | 196.7669469 | 0.676717587  | 0.15279124  | 4.429033939  | 9.47E-06 | 0.000111493 |
| FLJ45340 | 568.8630695 | 0.308874468  | 0.069757937 | 4.427803951  | 9.52E-06 | 0.00011206  |
| FOLR3    | 94.51674392 | -1.02299549  | 0.231192433 | -4.424865798 | 9.65E-06 | 0.000113524 |
| FXN      | 134.0324802 | -0.362020927 | 0.081818288 | -4.424694476 | 9.66E-06 | 0.000113543 |
| RPL10    | 5779.547635 | -0.419668465 | 0.094866721 | -4.423769068 | 9.70E-06 | 0.000113958 |
| DBNDD2   | 1346.826637 | -0.285107611 | 0.064479221 | -4.421697503 | 9.79E-06 | 0.000114984 |
| TOMM20   | 1183.679735 | -0.272995267 | 0.061748864 | -4.421057321 | 9.82E-06 | 0.000115253 |
| RRP1     | 368.3618837 | 0.298452356  | 0.067521776 | 4.420090427  | 9.87E-06 | 0.000115697 |
| P2RX7    | 1692.801522 | 0.470048225  | 0.106448784 | 4.415721901  | 1.01E-05 | 0.000117984 |
| CRELD1   | 246.50306   | 0.348575885  | 0.078942387 | 4.41557318   | 1.01E-05 | 0.000117991 |
| MYEOV2   | 1332.410854 | -0.268721164 | 0.060859518 | -4.41543365  | 1.01E-05 | 0.000117993 |
| ITGA1    | 36.54512628 | 0.764187745  | 0.173091919 | 4.414924463  | 1.01E-05 | 0.000118197 |
| ARHGEF6  | 93.57271803 | -0.565885068 | 0.128181383 | -4.414721181 | 1.01E-05 | 0.000118234 |
| PRSS21   | 293.7092083 | -0.404005866 | 0.091528353 | -4.413996887 | 1.01E-05 | 0.000118556 |
| TMEM192  | 386.6658503 | -0.447385504 | 0.101360508 | -4.413804859 | 1.02E-05 | 0.000118587 |
| HADHA    | 2949.273527 | -0.203539394 | 0.046134022 | -4.411915186 | 1.02E-05 | 0.000119552 |
| MAF      | 89.49689612 | -0.406047347 | 0.09204223  | -4.411533127 | 1.03E-05 | 0.000119688 |
| ADAMTS6  | 36.25606369 | -0.652415717 | 0.147915432 | -4.410734634 | 1.03E-05 | 0.00011998  |
| TGIF2    | 102.2311093 | 0.599938936  | 0.136015903 | 4.410799919  | 1.03E-05 | 0.00011998  |
| NREP     | 25.85517768 | -0.77927666  | 0.176695804 | -4.410272597 | 1.03E-05 | 0.000120161 |
| DNAJC1   | 462.5229212 | 0.40027361   | 0.090806655 | 4.407976611  | 1.04E-05 | 0.000121366 |
| NDUFS3   | 2025.080402 | 0.237043167  | 0.053783241 | 4.407379749  | 1.05E-05 | 0.000121625 |
| STX4     | 2858.68785  | 0.400671561  | 0.09093608  | 4.406079085  | 1.05E-05 | 0.000122281 |
| SGSM2    | 357.3236155 | -0.392784296 | 0.089205504 | -4.403139691 | 1.07E-05 | 0.000123873 |
| TNK2     | 625.2017723 | 0.468483087  | 0.106405605 | 4.402804606  | 1.07E-05 | 0.000123987 |
| TARBP1   | 100.3807476 | -0.52379139  | 0.118978223 | -4.402413952 | 1.07E-05 | 0.000124134 |
| CD72     | 124.3837117 | -0.743764268 | 0.168966112 | -4.401854661 | 1.07E-05 | 0.000124377 |
| IL6ST    | 432.049589  | 0.388806889  | 0.088340363 | 4.40123715   | 1.08E-05 | 0.000124654 |
| ZFYVE26  | 3847.074477 | -0.213888569 | 0.048610376 | -4.400059944 | 1.08E-05 | 0.000125254 |
| ICOS     | 53.10444988 | 0.867542944  | 0.197200764 | 4.399287956  | 1.09E-05 | 0.000125622 |
| NELF     | 192.8924863 | -0.464749058 | 0.105724495 | -4.39585037  | 1.10E-05 | 0.000127548 |

|          |             |              |             |              |          |             |
|----------|-------------|--------------|-------------|--------------|----------|-------------|
| TDRKH    | 46.1134518  | -0.628803513 | 0.143051969 | -4.395629896 | 1.10E-05 | 0.000127598 |
| SLC29A1  | 744.2242263 | -0.344137926 | 0.078321079 | -4.393937489 | 1.11E-05 | 0.000128437 |
| SLFN13   | 5.755124169 | 1.742129808  | 0.396477466 | 4.394019727  | 1.11E-05 | 0.000128437 |
| TDG      | 420.7836308 | 0.301262065  | 0.06856838  | 4.393600451  | 1.11E-05 | 0.000128557 |
| SGK110   | 10.9827916  | 1.595884004  | 0.3632528   | 4.393315085  | 1.12E-05 | 0.000128646 |
| THOC5    | 433.9234437 | 0.343226947  | 0.078145908 | 4.392129507  | 1.12E-05 | 0.00012927  |
| CHST14   | 70.67513567 | -0.786520541 | 0.179206433 | -4.388907957 | 1.14E-05 | 0.000131038 |
| RNF130   | 10068.0002  | -0.276311976 | 0.062955972 | -4.388971625 | 1.14E-05 | 0.000131038 |
| SIGLEC9  | 909.9581326 | -0.360745485 | 0.082212613 | -4.3879579   | 1.14E-05 | 0.00013153  |
| PTTG1    | 18.53068954 | 0.874528649  | 0.199330536 | 4.387329033  | 1.15E-05 | 0.000131829 |
| PSMB2    | 6363.209153 | 0.503451517  | 0.11475997  | 4.386995894  | 1.15E-05 | 0.00013195  |
| ZC3HAV1L | 10.47094612 | -0.953182445 | 0.217309484 | -4.386290139 | 1.15E-05 | 0.000132297 |
| PHLDB1   | 15.49927025 | 1.690808529  | 0.385670777 | 4.384072199  | 1.16E-05 | 0.00013357  |
| LOC28314 | 13.95452297 | -1.146376756 | 0.261573152 | -4.382623935 | 1.17E-05 | 0.000134378 |
| GPR56    | 13.02908584 | 1.839843945  | 0.419833769 | 4.382315291  | 1.17E-05 | 0.000134486 |
| CCDC94   | 207.268796  | 0.412578083  | 0.094168219 | 4.381287944  | 1.18E-05 | 0.000135039 |
| PSRC1    | 3.835092832 | -2.004797205 | 0.457693559 | -4.380217209 | 1.19E-05 | 0.000135621 |
| PIP4K2A  | 579.3965022 | -0.301031468 | 0.068756795 | -4.378206799 | 1.20E-05 | 0.000136794 |
| FAM222B  | 418.6726357 | -0.306857668 | 0.070175047 | -4.372746158 | 1.23E-05 | 0.000140176 |
| RFFL     | 785.2813794 | 0.39011667   | 0.089287235 | 4.369232275  | 1.25E-05 | 0.000142363 |
| NCOA7    | 308.3642932 | -0.478106382 | 0.109470268 | -4.367454187 | 1.26E-05 | 0.000143439 |
| BAZ2A    | 741.4518493 | 0.37206124   | 0.085201932 | 4.366816956  | 1.26E-05 | 0.00014377  |
| LOC10012 | 15.92667503 | -0.776313641 | 0.177805327 | -4.36608765  | 1.26E-05 | 0.000144162 |
| PTPRE    | 1662.645669 | 0.391643454  | 0.089721662 | 4.365093616  | 1.27E-05 | 0.000144721 |
| ZFYVE21  | 182.3565697 | -0.289279685 | 0.06627294  | -4.36497436  | 1.27E-05 | 0.000144721 |
| TMSB4X   | 51521.7555  | -0.378717205 | 0.086832022 | -4.361492435 | 1.29E-05 | 0.000146954 |
| SEMA6B   | 2451.014442 | -0.445660358 | 0.102240702 | -4.358932872 | 1.31E-05 | 0.000148592 |
| ALDH1A2  | 336.4386181 | 0.832855925  | 0.191162355 | 4.356798826  | 1.32E-05 | 0.000149865 |
| AP1S2    | 713.8187611 | -0.503370253 | 0.115535696 | -4.356837519 | 1.32E-05 | 0.000149865 |
| UBP1     | 514.6493301 | 0.380445701  | 0.087390206 | 4.353413503  | 1.34E-05 | 0.000152107 |
| USO1     | 440.868944  | 0.336184174  | 0.077242942 | 4.352296363  | 1.35E-05 | 0.000152791 |
| SHROOM3  | 293.8139205 | 1.206688676  | 0.277390424 | 4.350145391  | 1.36E-05 | 0.000154203 |
| RPL13AP2 | 986.1570411 | -0.564953468 | 0.129945812 | -4.347608135 | 1.38E-05 | 0.000155903 |
| POLR2G   | 471.259236  | -0.215149036 | 0.049498746 | -4.346555308 | 1.38E-05 | 0.000156473 |
| TCF4     | 11.13650351 | -1.050779923 | 0.241750849 | -4.346540783 | 1.38E-05 | 0.000156473 |
| RPL27    | 5800.363754 | -0.334800854 | 0.077070959 | -4.344059808 | 1.40E-05 | 0.000158155 |
| TMEM223  | 138.0503995 | -0.565353156 | 0.130150431 | -4.343843907 | 1.40E-05 | 0.000158215 |
| MCOLN1   | 2116.78703  | -0.327057318 | 0.075313849 | -4.342592    | 1.41E-05 | 0.000158927 |
| ZCCHC11  | 202.5962085 | -0.444162816 | 0.102278911 | -4.342662742 | 1.41E-05 | 0.000158927 |
| CD36     | 2253.016945 | -0.817862229 | 0.188342319 | -4.342424131 | 1.41E-05 | 0.000158952 |
| ATP6V1A  | 1848.408576 | 0.320347313  | 0.073782924 | 4.341754106  | 1.41E-05 | 0.000159341 |
| FAM159A  | 5.368678563 | -2.291228865 | 0.527845296 | -4.34072044  | 1.42E-05 | 0.000159996 |
| KRR1     | 391.596641  | 0.346586475  | 0.079904865 | 4.337489002  | 1.44E-05 | 0.000162072 |
| LOC14688 | 247.5815942 | -0.443102497 | 0.102151171 | -4.337713324 | 1.44E-05 | 0.000162072 |
| TMEM173  | 93.8523385  | 1.022000885  | 0.235613481 | 4.337616346  | 1.44E-05 | 0.000162072 |
| RASSF5   | 732.2720149 | 0.270294723  | 0.062348271 | 4.335240085  | 1.46E-05 | 0.000163639 |
| ARID3B   | 151.0126963 | 0.503264506  | 0.116124201 | 4.333846894  | 1.47E-05 | 0.000164579 |
| TMEM220  | 126.7211771 | -0.405234171 | 0.093520488 | -4.333105848 | 1.47E-05 | 0.000165035 |
| ADRB2    | 24.05894857 | -1.119353595 | 0.258355851 | -4.332604001 | 1.47E-05 | 0.000165312 |

|           |             |              |             |              |          |             |
|-----------|-------------|--------------|-------------|--------------|----------|-------------|
| PARP3     | 249.3573938 | 0.345165574  | 0.079718978 | 4.329779198  | 1.49E-05 | 0.000167346 |
| CCDC112   | 78.8568645  | -0.638747112 | 0.147639024 | -4.326411091 | 1.52E-05 | 0.000169747 |
| HSD17B4   | 4232.775895 | -0.280622043 | 0.064863077 | -4.326375777 | 1.52E-05 | 0.000169747 |
| SWAP70    | 1352.985912 | -0.420339866 | 0.097321682 | -4.319077272 | 1.57E-05 | 0.000175353 |
| TEAD4     | 3.662726822 | 1.983495761  | 0.459274541 | 4.318758359  | 1.57E-05 | 0.000175501 |
| YAP1      | 7.512175436 | 1.484066961  | 0.343763432 | 4.317117008  | 1.58E-05 | 0.000176705 |
| AKAP11    | 354.7832807 | -0.446480685 | 0.103498994 | -4.31386496  | 1.60E-05 | 0.000179218 |
| GGA3      | 512.6548972 | -0.307710831 | 0.071339591 | -4.313324839 | 1.61E-05 | 0.000179549 |
| KIAA1958  | 62.85234356 | 0.557813026  | 0.129340223 | 4.31275758   | 1.61E-05 | 0.000179814 |
| PHKA2     | 147.5490788 | -0.470425067 | 0.109078152 | -4.312734097 | 1.61E-05 | 0.000179814 |
| RNF146    | 227.009101  | -0.332788235 | 0.077170562 | -4.312372858 | 1.62E-05 | 0.000180001 |
| UBE3D     | 47.52379897 | -0.541718706 | 0.125768387 | -4.307272433 | 1.65E-05 | 0.00018409  |
| CEACAM3   | 12.78926738 | -1.213450349 | 0.281741934 | -4.306956843 | 1.66E-05 | 0.000184243 |
| SNHG5     | 516.0267324 | -0.45270024  | 0.105214836 | -4.302627427 | 1.69E-05 | 0.000187769 |
| SPOCD1    | 1322.377528 | 0.570686296  | 0.132641109 | 4.302484366  | 1.69E-05 | 0.000187778 |
| KBTBD8    | 77.24816529 | 0.52756474   | 0.122671862 | 4.300617358  | 1.70E-05 | 0.000189254 |
| DBP       | 57.25152809 | -1.038771757 | 0.241563573 | -4.300200329 | 1.71E-05 | 0.000189498 |
| ARL5B     | 243.3733424 | 0.4760646    | 0.110829174 | 4.295480893  | 1.74E-05 | 0.000193229 |
| STAP1     | 21.63068946 | 1.813609251  | 0.422194189 | 4.295675546  | 1.74E-05 | 0.000193229 |
| SUMF1     | 519.2014573 | -0.293426875 | 0.068309415 | -4.295555348 | 1.74E-05 | 0.000193229 |
| SCARB1    | 1715.826207 | -0.600955892 | 0.139939449 | -4.294399436 | 1.75E-05 | 0.000194058 |
| CTNBL1    | 796.8023641 | 0.525362231  | 0.122356556 | 4.29369908   | 1.76E-05 | 0.000194556 |
| DCAF11    | 699.106913  | 0.261940052  | 0.061019496 | 4.292727247  | 1.76E-05 | 0.000195294 |
| ACOX3     | 163.7570344 | 0.374336959  | 0.087252341 | 4.290279833  | 1.78E-05 | 0.000197341 |
| CA11      | 76.43763705 | 0.521893683  | 0.121660922 | 4.289739679  | 1.79E-05 | 0.000197609 |
| DCP1A     | 654.5176034 | 0.359943631  | 0.083908504 | 4.289715729  | 1.79E-05 | 0.000197609 |
| METTL21A  | 139.4893383 | -0.467383963 | 0.108959258 | -4.289529612 | 1.79E-05 | 0.000197657 |
| IGBP1     | 567.7609004 | -0.422799236 | 0.098583013 | -4.288763565 | 1.80E-05 | 0.000198223 |
| ORAI3     | 48.3800975  | -0.544625388 | 0.127000928 | -4.288357557 | 1.80E-05 | 0.000198452 |
| SIK3      | 653.710079  | 0.602403213  | 0.140477822 | 4.288244257  | 1.80E-05 | 0.000198452 |
| GSTO1     | 660.3734022 | 0.302427091  | 0.070530487 | 4.287891701  | 1.80E-05 | 0.000198649 |
| TBC1D4    | 87.33489079 | -0.887986472 | 0.207117902 | -4.287347764 | 1.81E-05 | 0.000199018 |
| MFSD12    | 184.7061733 | 0.697907455  | 0.162788593 | 4.287201224  | 1.81E-05 | 0.000199032 |
| CTPS2     | 165.059182  | -0.484943118 | 0.113148379 | -4.28590424  | 1.82E-05 | 0.000200079 |
| EFTUD1    | 561.2344719 | 0.639431988  | 0.149205649 | 4.28557494   | 1.82E-05 | 0.000200257 |
| PPP2R4    | 1303.638213 | 0.459010899  | 0.107132291 | 4.284524252  | 1.83E-05 | 0.000201088 |
| LAMB2     | 197.0922907 | -0.386806545 | 0.090291617 | -4.283969653 | 1.84E-05 | 0.000201471 |
| PIAS2     | 550.1334326 | -0.5164021   | 0.120593477 | -4.28217273  | 1.85E-05 | 0.000202986 |
| TTBK2     | 96.63836081 | -0.45634357  | 0.106606372 | -4.280640668 | 1.86E-05 | 0.000204268 |
| CD82      | 1548.983977 | 0.713130921  | 0.166617251 | 4.280054546  | 1.87E-05 | 0.000204686 |
| SPTLC3    | 10.71311239 | -2.208348521 | 0.516027208 | -4.279519543 | 1.87E-05 | 0.000205059 |
| STXBP5-AS | 24.70655765 | 1.298547523  | 0.303571303 | 4.277570074  | 1.89E-05 | 0.000206741 |
| ASTE1     | 89.85437911 | -0.616672615 | 0.144302038 | -4.273485138 | 1.92E-05 | 0.000210443 |
| CDKN2A    | 17.27412097 | 1.431006437  | 0.334878326 | 4.273213067  | 1.93E-05 | 0.000210576 |
| SLC37A3   | 16.35747096 | 0.824019275  | 0.192907383 | 4.271579777  | 1.94E-05 | 0.000212001 |
| PIK3CB    | 1751.016361 | 0.324190812  | 0.075908848 | 4.270790818  | 1.95E-05 | 0.000212627 |
| GPR155    | 52.69999724 | -0.762466389 | 0.178564797 | -4.269970347 | 1.95E-05 | 0.000213286 |
| C12orf57  | 270.7179587 | 0.381344596  | 0.08931684  | 4.26957109   | 1.96E-05 | 0.000213543 |
| PET117    | 117.0606464 | -0.31399235  | 0.073552355 | -4.268963901 | 1.96E-05 | 0.000214    |

|           |             |              |             |              |          |             |
|-----------|-------------|--------------|-------------|--------------|----------|-------------|
| ZNF514    | 120.0832404 | -0.528785492 | 0.1238879   | -4.268257753 | 1.97E-05 | 0.000214553 |
| IL2RB     | 64.21636887 | 1.128486349  | 0.264463533 | 4.267077336  | 1.98E-05 | 0.000215565 |
| AOC2      | 16.20907959 | 0.826581992  | 0.193720548 | 4.266878238  | 1.98E-05 | 0.000215631 |
| ARHGAP35  | 479.1554114 | -0.361122629 | 0.084644632 | -4.266338214 | 1.99E-05 | 0.000216028 |
| ZNF280D   | 107.0535983 | -0.584318799 | 0.13702763  | -4.264240707 | 2.01E-05 | 0.00021794  |
| MICAL1    | 2235.03912  | -0.412953383 | 0.096891419 | -4.262022259 | 2.03E-05 | 0.000219987 |
| AAMP      | 552.8004558 | 0.442570666  | 0.103930212 | 4.258344669  | 2.06E-05 | 0.000223506 |
| SLC1A3    | 1703.103549 | 0.487320052  | 0.114446401 | 4.258063562  | 2.06E-05 | 0.000223657 |
| GPR132    | 25.46701289 | 1.176572192  | 0.276342629 | 4.257657224  | 2.07E-05 | 0.000223934 |
| CCNK      | 1193.699206 | 0.370422845  | 0.087013907 | 4.257053355  | 2.07E-05 | 0.000224409 |
| KIDINS220 | 1137.012704 | -0.242411368 | 0.056948542 | -4.256673842 | 2.07E-05 | 0.000224659 |
| SAV1      | 524.1159948 | 0.451328193  | 0.106055707 | 4.255576674  | 2.09E-05 | 0.000225633 |
| RHOC      | 2697.74864  | 0.571562287  | 0.13432885  | 4.254948111  | 2.09E-05 | 0.000226136 |
| LINC00622 | 114.1466068 | 0.781442877  | 0.183733284 | 4.253137259  | 2.11E-05 | 0.000227841 |
| LRG1      | 16.91715093 | -1.054083343 | 0.24793491  | -4.251451894 | 2.12E-05 | 0.00022943  |
| TAPBP     | 64.36823896 | 0.723193009  | 0.170113589 | 4.251235981  | 2.13E-05 | 0.000229518 |
| PBLD      | 19.25407473 | -0.793917858 | 0.186770646 | -4.250763572 | 2.13E-05 | 0.000229869 |
| FAM117B   | 21.4925727  | -0.965914165 | 0.227247704 | -4.250490316 | 2.13E-05 | 0.000230017 |
| SLC26A11  | 513.9008153 | -0.374278569 | 0.088066137 | -4.249971478 | 2.14E-05 | 0.000230417 |
| SIGIRR    | 67.47477397 | -0.585369441 | 0.137751672 | -4.249454342 | 2.14E-05 | 0.000230816 |
| ASCL1     | 3.327215829 | 2.947371257  | 0.693812259 | 4.248081841  | 2.16E-05 | 0.000232012 |
| ZDHHC2    | 401.2945055 | -0.605318042 | 0.142493565 | -4.248037758 | 2.16E-05 | 0.000232012 |
| C10orf11  | 402.7484521 | -0.42213489  | 0.099394372 | -4.247070329 | 2.17E-05 | 0.000232881 |
| BTN2A1    | 479.5220499 | 0.388916486  | 0.091602528 | 4.245696015  | 2.18E-05 | 0.000234043 |
| DUSP6     | 964.9277916 | 0.279273809  | 0.065777059 | 4.245763073  | 2.18E-05 | 0.000234043 |
| NECAB3    | 100.6457381 | -0.464354549 | 0.109457827 | -4.242314697 | 2.21E-05 | 0.000237461 |
| PARVG     | 2834.742606 | -0.363501303 | 0.085713569 | -4.240883974 | 2.23E-05 | 0.000238769 |
| PPP2R3A   | 193.2665595 | 0.454125724  | 0.107084304 | 4.240824352  | 2.23E-05 | 0.000238769 |
| LGALS3BP  | 5228.175511 | 0.52604895   | 0.124079421 | 4.239614782  | 2.24E-05 | 0.000239921 |
| NKD1      | 4.682873345 | 1.800363359  | 0.424689515 | 4.239246072  | 2.24E-05 | 0.000240177 |
| TRIM35    | 55.34454568 | 0.83817663   | 0.19784567  | 4.236517442  | 2.27E-05 | 0.000242973 |
| LGALS1    | 4141.906386 | -0.235101992 | 0.055526527 | -4.234048198 | 2.30E-05 | 0.000245517 |
| TUBB6     | 1097.285469 | 0.369095167  | 0.087179314 | 4.233747069  | 2.30E-05 | 0.000245705 |
| CASP6     | 229.2677003 | -0.320847372 | 0.075901179 | -4.227172423 | 2.37E-05 | 0.000252703 |
| YRDC      | 146.6389533 | 0.426145431  | 0.100809086 | 4.2272522    | 2.37E-05 | 0.000252703 |
| MAP3K1    | 869.4447403 | -0.598891482 | 0.141718238 | -4.225930915 | 2.38E-05 | 0.000253955 |
| TRIM33    | 215.1145674 | 0.438624156  | 0.103797419 | 4.225771322  | 2.38E-05 | 0.00025399  |
| SIPA1L1   | 222.4707284 | 0.754079404  | 0.178469949 | 4.225245822  | 2.39E-05 | 0.000254437 |
| CXorf23   | 19.08404943 | -0.72280384  | 0.171115136 | -4.224078925 | 2.40E-05 | 0.000255613 |
| ACER3     | 622.3874407 | -0.375826779 | 0.088997161 | -4.222907517 | 2.41E-05 | 0.000256799 |
| SLC41A2   | 287.3986765 | 0.801775815  | 0.190035525 | 4.219083863  | 2.45E-05 | 0.000261043 |
| CYSLTR1   | 68.93288786 | -1.120263535 | 0.265782033 | -4.214970901 | 2.50E-05 | 0.000265694 |
| DNMBP     | 65.21111842 | -0.571106882 | 0.135505151 | -4.214650704 | 2.50E-05 | 0.00026592  |
| MAVS      | 215.5549082 | -0.355562448 | 0.084391742 | -4.213237456 | 2.52E-05 | 0.000267437 |
| FCHO2     | 2209.341358 | -0.295370656 | 0.070112472 | -4.21281188  | 2.52E-05 | 0.000267789 |
| FAM71A    | 15.7155289  | 1.300124951  | 0.308687214 | 4.211787507  | 2.53E-05 | 0.000268854 |
| SNHG7     | 44.11965656 | -0.860576589 | 0.204476052 | -4.208691339 | 2.57E-05 | 0.000272408 |
| FBXL3     | 510.3288443 | 0.261828076  | 0.062253842 | 4.205813917  | 2.60E-05 | 0.000275741 |
| SHISA5    | 1830.151623 | 0.454154549  | 0.108011919 | 4.204670672  | 2.61E-05 | 0.000276981 |

|          |             |              |             |              |          |             |
|----------|-------------|--------------|-------------|--------------|----------|-------------|
| BCAS2    | 987.1931204 | 0.412983905  | 0.098279076 | 4.202154936  | 2.64E-05 | 0.00027976  |
| ZNF366   | 206.5924484 | 0.645350614  | 0.153572749 | 4.202246927  | 2.64E-05 | 0.00027976  |
| UBE2L3   | 3674.066225 | 0.236293715  | 0.056236028 | 4.201820884  | 2.65E-05 | 0.000280014 |
| SLC25A22 | 103.9689726 | 0.660096385  | 0.157124007 | 4.201117311  | 2.66E-05 | 0.000280726 |
| CCNG1    | 351.156982  | -0.552849142 | 0.131674588 | -4.198601645 | 2.69E-05 | 0.000283702 |
| PLAU     | 786.54289   | 0.395195417  | 0.094142806 | 4.197829171  | 2.69E-05 | 0.00028451  |
| SNTB2    | 333.1777294 | 0.459029975  | 0.109368847 | 4.197081588  | 2.70E-05 | 0.000285289 |
| LRP12    | 106.4241221 | 1.015277004  | 0.24202486  | 4.194928592  | 2.73E-05 | 0.000287849 |
| GDPD1    | 15.21898839 | -0.932472543 | 0.222540408 | -4.190126876 | 2.79E-05 | 0.000293842 |
| CRABP2   | 3289.089184 | 0.77088229   | 0.184010216 | 4.189345052  | 2.80E-05 | 0.00029469  |
| KBTBD7   | 62.62990567 | -0.692670572 | 0.165377979 | -4.188408738 | 2.81E-05 | 0.000295707 |
| REPS2    | 15.61193175 | -1.393410494 | 0.332690684 | -4.188306314 | 2.81E-05 | 0.000295707 |
| ADAM19   | 19.89238889 | 1.351811777  | 0.322799157 | 4.187779763  | 2.82E-05 | 0.000296227 |
| RPS3A    | 3105.515173 | -0.621928158 | 0.148515372 | -4.187634916 | 2.82E-05 | 0.000296249 |
| BRD3     | 367.867701  | -0.334434559 | 0.079886162 | -4.186389101 | 2.83E-05 | 0.000297711 |
| PSMB6    | 1063.436711 | 0.395347884  | 0.094496183 | 4.183744499  | 2.87E-05 | 0.000301027 |
| PIK3CD   | 307.5815586 | -0.477027887 | 0.114031926 | -4.183283618 | 2.87E-05 | 0.000301468 |
| CEPT1    | 483.8240865 | -0.502273868 | 0.120075452 | -4.182985451 | 2.88E-05 | 0.000301694 |
| CCND2    | 211.7791507 | 0.513945806  | 0.122882267 | 4.182424513  | 2.88E-05 | 0.00030227  |
| RHOU     | 427.0814765 | 0.531534828  | 0.127095191 | 4.182178923  | 2.89E-05 | 0.000302427 |
| FAM110A  | 117.8940203 | -0.380844088 | 0.091090402 | -4.180946391 | 2.90E-05 | 0.0003039   |
| SPRED1   | 423.853983  | 0.39489424   | 0.094458687 | 4.180602663  | 2.91E-05 | 0.000304189 |
| IPO5     | 446.5408064 | -0.392392358 | 0.093881911 | -4.179637541 | 2.92E-05 | 0.000305311 |
| SQLE     | 35.34721803 | 0.992805776  | 0.237564727 | 4.1790959    | 2.93E-05 | 0.000305868 |
| DYRK1B   | 70.34146324 | -0.568840984 | 0.136127228 | -4.178745066 | 2.93E-05 | 0.000306168 |
| PCSK7    | 552.8223026 | -0.189859297 | 0.045452531 | -4.177089653 | 2.95E-05 | 0.000308231 |
| TTF2     | 153.6933709 | -0.307507468 | 0.073642014 | -4.175706944 | 2.97E-05 | 0.000309936 |
| FOXRED2  | 50.1321919  | -0.793467123 | 0.19006461  | -4.174723133 | 2.98E-05 | 0.000311104 |
| C2orf49  | 245.1591314 | -0.284547138 | 0.068188245 | -4.172964676 | 3.01E-05 | 0.00031334  |
| BAIAP2L1 | 5.556091907 | 2.284357775  | 0.547581608 | 4.171721151  | 3.02E-05 | 0.00031488  |
| TP53TG1  | 20.56436485 | -0.772723415 | 0.185271561 | -4.170761078 | 3.04E-05 | 0.000316033 |
| ING2     | 170.1035118 | -0.441663537 | 0.105933538 | -4.169251253 | 3.06E-05 | 0.000317956 |
| FADS2    | 133.9382761 | 0.886295149  | 0.212624391 | 4.168360669  | 3.07E-05 | 0.000319022 |
| PPARG    | 2768.29251  | -0.318973125 | 0.076527038 | -4.168110155 | 3.07E-05 | 0.000319195 |
| NDUFB1   | 1328.787683 | -0.464560782 | 0.1115008   | -4.166434521 | 3.09E-05 | 0.00032137  |
| ZNF573   | 33.38535237 | -0.85616334  | 0.205652268 | -4.163160209 | 3.14E-05 | 0.000325833 |
| AHNAK    | 1279.129021 | -0.310997641 | 0.074769628 | -4.159411364 | 3.19E-05 | 0.000331043 |
| MFGE8    | 388.6645429 | -0.617714171 | 0.1485599   | -4.158014195 | 3.21E-05 | 0.000332888 |
| R3HDM1   | 387.7728661 | -0.371964175 | 0.089465143 | -4.157643556 | 3.22E-05 | 0.000333243 |
| ELMO2    | 426.8109273 | 0.327603132  | 0.078819845 | 4.156353411  | 3.23E-05 | 0.000334943 |
| PPIF     | 2838.686151 | 0.505317929  | 0.121625774 | 4.154694444  | 3.26E-05 | 0.000337195 |
| MAPKAPK2 | 1443.466253 | 0.271832218  | 0.065430012 | 4.154549401  | 3.26E-05 | 0.000337222 |
| THYN1    | 91.47942482 | -0.474083241 | 0.114170354 | -4.152419832 | 3.29E-05 | 0.000340187 |
| TM6SF1   | 375.5303867 | -0.582382329 | 0.140284208 | -4.151446123 | 3.30E-05 | 0.000341449 |
| MCM4     | 235.2885462 | 0.760163453  | 0.183157576 | 4.150324936  | 3.32E-05 | 0.000342935 |
| MOSPD2   | 1041.663322 | -0.248381641 | 0.05986077  | -4.149322506 | 3.33E-05 | 0.00034425  |
| ANXA9    | 25.39967431 | -0.931711955 | 0.224578801 | -4.14870839  | 3.34E-05 | 0.000344983 |
| GOSR1    | 291.5019455 | 0.32098179   | 0.077393894 | 4.147378722  | 3.36E-05 | 0.0003468   |
| ARF1     | 8378.823737 | 0.192908094  | 0.04651847  | 4.146913963  | 3.37E-05 | 0.000347312 |

|          |             |              |             |              |          |             |
|----------|-------------|--------------|-------------|--------------|----------|-------------|
| TBC1D23  | 844.3629092 | 0.348287874  | 0.083995547 | 4.14650405   | 3.38E-05 | 0.000347742 |
| ICAM1    | 983.2686828 | 1.078416723  | 0.260089321 | 4.146332183  | 3.38E-05 | 0.000347811 |
| KIAA0922 | 443.9892692 | -0.413336914 | 0.099713899 | -4.145228696 | 3.39E-05 | 0.000349297 |
| KIF13A   | 46.25981823 | 0.794867604  | 0.191771912 | 4.144859352  | 3.40E-05 | 0.000349668 |
| MRPL55   | 132.9331291 | -0.323036357 | 0.077953596 | -4.143957094 | 3.41E-05 | 0.000350853 |
| RP2      | 1104.427336 | 0.243750479  | 0.058826936 | 4.143518172  | 3.42E-05 | 0.000351332 |
| EIF5A    | 5430.190748 | 0.226580996  | 0.054695556 | 4.142585157  | 3.43E-05 | 0.00035257  |
| GNG2     | 32.12972528 | -1.035575623 | 0.250078278 | -4.141005899 | 3.46E-05 | 0.000354616 |
| TUBG1    | 722.1176516 | 0.235684154  | 0.056913626 | 4.141084835  | 3.46E-05 | 0.000354616 |
| KIAA0146 | 457.8511571 | -0.288869332 | 0.069794163 | -4.138875205 | 3.49E-05 | 0.000357728 |
| RPL38    | 3741.131317 | -0.303424107 | 0.073372998 | -4.135364726 | 3.54E-05 | 0.000363042 |
| PSAP     | 133711.6274 | -0.320394451 | 0.077535105 | -4.132250162 | 3.59E-05 | 0.000367795 |
| CCDC64   | 14.32798397 | 1.013248097  | 0.245263841 | 4.13125756   | 3.61E-05 | 0.000368985 |
| TMEM150  | 254.1564816 | -0.405748365 | 0.098214295 | -4.131255697 | 3.61E-05 | 0.000368985 |
| LDLRAD3  | 21.61123799 | -1.282331327 | 0.310793582 | -4.125990373 | 3.69E-05 | 0.000377323 |
| RPS20    | 4733.932337 | -0.549675677 | 0.133248763 | -4.125184086 | 3.70E-05 | 0.00037844  |
| RHBDD2   | 1261.027846 | 0.411249437  | 0.099727929 | 4.123713794  | 3.73E-05 | 0.000380656 |
| STARD13  | 46.90602504 | -0.894129321 | 0.216900784 | -4.122296405 | 3.75E-05 | 0.000382797 |
| UNC119B  | 48.19938663 | -0.585547717 | 0.14205549  | -4.121964727 | 3.76E-05 | 0.000383139 |
| GALNT12  | 1662.00706  | 0.514922023  | 0.124939904 | 4.121357614  | 3.77E-05 | 0.00038394  |
| TARP     | 54.72786625 | 1.268864928  | 0.307907323 | 4.120931313  | 3.77E-05 | 0.000384441 |
| ADCK3    | 260.8966189 | -0.350369474 | 0.085039442 | -4.120082007 | 3.79E-05 | 0.00038565  |
| SESN2    | 868.6995498 | 0.369448603  | 0.089685239 | 4.119391409  | 3.80E-05 | 0.000386596 |
| CHST7    | 780.4006412 | 0.640269488  | 0.155559685 | 4.115908862  | 3.86E-05 | 0.000392267 |
| VGLL4    | 243.923645  | -0.300023746 | 0.072910644 | -4.114951236 | 3.87E-05 | 0.000393684 |
| CLSTN3   | 81.81388112 | 0.621520741  | 0.151077919 | 4.113908524  | 3.89E-05 | 0.000395252 |
| SCP2     | 1732.325279 | -0.311933993 | 0.075833671 | -4.113396967 | 3.90E-05 | 0.000395913 |
| ZNF510   | 102.0549826 | -0.481751052 | 0.11713279  | -4.112862432 | 3.91E-05 | 0.000396615 |
| PTRHD1   | 409.6839429 | -0.36409166  | 0.088545612 | -4.111910803 | 3.92E-05 | 0.000398037 |
| LOC38764 | 554.2415868 | 0.242907808  | 0.059089862 | 4.110820346  | 3.94E-05 | 0.000399704 |
| MAP4K3   | 298.8981572 | 0.481718345  | 0.117223545 | 4.109399221  | 3.97E-05 | 0.000401953 |
| AHRR     | 5.990209949 | -1.628865177 | 0.396393937 | -4.109208101 | 3.97E-05 | 0.000402067 |
| CRYBB1   | 1.980959063 | -3.009325578 | 0.732445437 | -4.10860035  | 3.98E-05 | 0.000402908 |
| PHLDA3   | 379.9666965 | 0.347592188  | 0.08462004  | 4.107681671  | 4.00E-05 | 0.000404293 |
| ACSM3    | 27.53883731 | -0.788039287 | 0.191856416 | -4.107442977 | 4.00E-05 | 0.000404492 |
| SIGLEC11 | 303.26728   | -0.490703963 | 0.119530565 | -4.105259312 | 4.04E-05 | 0.00040811  |
| TLR5     | 54.57680357 | -1.194338873 | 0.290964864 | -4.104752907 | 4.05E-05 | 0.000408784 |
| ATP7A    | 242.5238358 | -0.39139699  | 0.095383031 | -4.103423711 | 4.07E-05 | 0.000410918 |
| PSMB10   | 949.274957  | 0.373061403  | 0.090937207 | 4.102406663  | 4.09E-05 | 0.000412505 |
| FAM212B  | 48.00893062 | -0.600703836 | 0.146573965 | -4.098298343 | 4.16E-05 | 0.000419667 |
| DANCR    | 96.8810378  | -0.474863278 | 0.115930469 | -4.096104188 | 4.20E-05 | 0.000423433 |
| CDA      | 155.3339023 | 0.513657445  | 0.125410605 | 4.095805497  | 4.21E-05 | 0.00042375  |
| DUSP16   | 232.1352488 | -0.469309431 | 0.11461428  | -4.094685491 | 4.23E-05 | 0.000425574 |
| AKR1C1   | 322.0549882 | 0.920682059  | 0.22486766  | 4.094328449  | 4.23E-05 | 0.000426    |
| IL18BP   | 128.3820395 | -0.766229603 | 0.18717216  | -4.093715658 | 4.25E-05 | 0.000426897 |
| IFI16    | 2681.993291 | 0.292595164  | 0.071480143 | 4.093376862  | 4.25E-05 | 0.000427291 |
| FITM2    | 72.98705996 | -0.434265971 | 0.106179093 | -4.089938585 | 4.31E-05 | 0.000433441 |
| KCNMA1   | 18.47043461 | -0.846509675 | 0.207032172 | -4.08878323  | 4.34E-05 | 0.000435371 |
| DUSP8    | 74.53887007 | 0.615384963  | 0.150551322 | 4.087542731  | 4.36E-05 | 0.000437233 |

|           |             |              |             |              |          |             |
|-----------|-------------|--------------|-------------|--------------|----------|-------------|
| N4BP2L1   | 162.6754005 | 0.372028286  | 0.091013453 | 4.087618619  | 4.36E-05 | 0.000437233 |
| ATP2B1    | 769.3748683 | 0.388689904  | 0.0951383   | 4.085525021  | 4.40E-05 | 0.000440813 |
| AHCYL1    | 2636.94148  | 0.322786762  | 0.079083454 | 4.081596667  | 4.47E-05 | 0.000448091 |
| BCL2A1    | 2243.525787 | 0.547151635  | 0.134058903 | 4.081427068  | 4.48E-05 | 0.000448177 |
| SOCS7     | 117.0004951 | -0.338007139 | 0.082819296 | -4.081260712 | 4.48E-05 | 0.000448258 |
| FAM214A   | 140.8619509 | -0.35487579  | 0.086978723 | -4.080029897 | 4.50E-05 | 0.000450396 |
| RGL3      | 59.41771149 | -0.47540281  | 0.116530309 | -4.079649447 | 4.51E-05 | 0.000450891 |
| UTP6      | 769.6448958 | 0.240416011  | 0.058963374 | 4.077378789  | 4.55E-05 | 0.000455072 |
| ACE       | 451.0377348 | 0.697491432  | 0.171140936 | 4.07553826   | 4.59E-05 | 0.000458441 |
| C8orf76   | 478.0717212 | 0.332183501  | 0.081512782 | 4.075232026  | 4.60E-05 | 0.000458799 |
| GTPBP4    | 299.6473831 | 0.423407394  | 0.103925247 | 4.074153366  | 4.62E-05 | 0.000460683 |
| HIAT1     | 329.0293639 | 0.287467885  | 0.070579312 | 4.07297655   | 4.64E-05 | 0.00046277  |
| AVPI1     | 873.9046107 | -0.240609333 | 0.059077807 | -4.072753312 | 4.65E-05 | 0.000462966 |
| KIAA1147  | 497.9483066 | 0.399345367  | 0.09814083  | 4.069105268  | 4.72E-05 | 0.000470023 |
| CUEDC1    | 286.8059761 | -0.392069154 | 0.096381046 | -4.067907215 | 4.74E-05 | 0.000472193 |
| AMIGO2    | 180.3137012 | -0.443405995 | 0.109026644 | -4.0669508   | 4.76E-05 | 0.000473882 |
| LOC100271 | 6.165688437 | -1.476316936 | 0.363036829 | -4.066576218 | 4.77E-05 | 0.00047439  |
| OSGEP     | 232.1431544 | -0.255271595 | 0.062820802 | -4.063488331 | 4.83E-05 | 0.000480456 |
| C11orf84  | 125.0229907 | -0.437936161 | 0.107777204 | -4.063346818 | 4.84E-05 | 0.000480492 |
| DIMT1     | 118.9731543 | -0.384645269 | 0.094685565 | -4.062343288 | 4.86E-05 | 0.000482306 |
| CXCR6     | 30.79412257 | 0.993171002  | 0.244523086 | 4.061665573  | 4.87E-05 | 0.000483451 |
| GLDN      | 97.27632966 | 0.880924753  | 0.217023315 | 4.059124943  | 4.93E-05 | 0.00048848  |
| SNX7      | 161.9477372 | -0.318524404 | 0.078506524 | -4.057298538 | 4.96E-05 | 0.000492053 |
| ALG14     | 97.14717978 | -0.460917483 | 0.113612169 | -4.05693762  | 4.97E-05 | 0.000492551 |
| TKT       | 3165.247377 | -0.559665173 | 0.138006638 | -4.055349659 | 5.01E-05 | 0.000495646 |
| TAGLN2    | 6043.911521 | 0.293072178  | 0.072305019 | 4.053275741  | 5.05E-05 | 0.000499797 |
| ZSCAN16   | 41.81018795 | 0.571971302  | 0.141199219 | 4.05081067   | 5.10E-05 | 0.000504824 |
| CSRP2     | 10.33504022 | 1.244225488  | 0.307200867 | 4.050201743  | 5.12E-05 | 0.000505659 |
| S1PR3     | 5.338158722 | 2.670643918  | 0.659389616 | 4.050175882  | 5.12E-05 | 0.000505659 |
| LOC730101 | 61.52712812 | -0.483713257 | 0.119455826 | -4.049306531 | 5.14E-05 | 0.000507272 |
| PNP       | 590.1669836 | 0.526620968  | 0.130070313 | 4.048740696  | 5.15E-05 | 0.00050823  |
| CASS4     | 104.369885  | 0.584527143  | 0.144481136 | 4.045698704  | 5.22E-05 | 0.000514603 |
| DDX20     | 317.2970179 | -0.349573624 | 0.086415266 | -4.045276234 | 5.23E-05 | 0.000515259 |
| HMGCR     | 295.1074902 | 0.399285636  | 0.098714615 | 4.044848227  | 5.24E-05 | 0.000515929 |
| RAP2C     | 563.4425831 | 0.372251324  | 0.092047736 | 4.044111684  | 5.25E-05 | 0.000517279 |
| MPZL3     | 114.6966982 | 0.528036878  | 0.13057956  | 4.043794298  | 5.26E-05 | 0.000517707 |
| ERO1L     | 958.7442353 | 0.243021927  | 0.060116166 | 4.042538671  | 5.29E-05 | 0.000519939 |
| LRRC37A3  | 13.59782511 | 0.966459813  | 0.239070301 | 4.042575797  | 5.29E-05 | 0.000519939 |
| PXMP4     | 69.20566073 | -0.485014896 | 0.120004349 | -4.041644331 | 5.31E-05 | 0.000521651 |
| NUDT14    | 308.6663617 | -0.375064468 | 0.092813153 | -4.0410702   | 5.32E-05 | 0.000522654 |
| FAM228B   | 23.09703581 | -0.932453767 | 0.230976428 | -4.037008344 | 5.41E-05 | 0.000531502 |
| STAT4     | 17.21876092 | 1.227545209  | 0.304285294 | 4.034191699  | 5.48E-05 | 0.000537634 |
| IL4R      | 1332.300334 | 0.363794022  | 0.090181291 | 4.034029848  | 5.48E-05 | 0.000537722 |
| ZDHHC11   | 15.21142862 | -1.095161856 | 0.271494761 | -4.033823163 | 5.49E-05 | 0.000537912 |
| GLTSCR2   | 890.3184787 | -0.667259541 | 0.165589943 | -4.029589776 | 5.59E-05 | 0.000547403 |
| SPAG9     | 1349.864486 | 0.303948197  | 0.075465959 | 4.027619906  | 5.63E-05 | 0.000551719 |
| TMCC3     | 458.9382271 | 0.423374553  | 0.105127613 | 4.027244054  | 5.64E-05 | 0.000552311 |
| FBXO15    | 10.6892357  | 0.994571122  | 0.246973631 | 4.02703364   | 5.65E-05 | 0.000552515 |
| MTA1      | 221.5011518 | -0.366794897 | 0.091087801 | -4.026827884 | 5.65E-05 | 0.000552708 |

|           |             |              |             |              |          |             |
|-----------|-------------|--------------|-------------|--------------|----------|-------------|
| ZBTB17    | 175.4215126 | 0.343616086  | 0.085340515 | 4.026412162  | 5.66E-05 | 0.000553395 |
| TIMMDC1   | 447.9989253 | -0.332711988 | 0.082681278 | -4.024030538 | 5.72E-05 | 0.000558732 |
| GLCCI1    | 23.80106675 | -0.702877971 | 0.174804292 | -4.020942293 | 5.80E-05 | 0.000565516 |
| ST3GAL2   | 648.1325251 | 0.617773538  | 0.153635983 | 4.021021144  | 5.79E-05 | 0.000565516 |
| PKN1      | 1410.954278 | -0.250423646 | 0.062283171 | -4.020727286 | 5.80E-05 | 0.000565736 |
| PSMA2     | 965.4900687 | 0.335783124  | 0.083639134 | 4.014665245  | 5.95E-05 | 0.000580171 |
| CST7      | 22.36663754 | -1.117761017 | 0.278478296 | -4.013817346 | 5.97E-05 | 0.000581955 |
| MELK      | 21.935441   | 0.695992782  | 0.173410305 | 4.013560678  | 5.98E-05 | 0.000582284 |
| SLC2A4RG  | 182.0173239 | -0.461957432 | 0.115149505 | -4.011805639 | 6.03E-05 | 0.000586325 |
| LOC10050! | 109.5220269 | -0.640369641 | 0.159678762 | -4.010362003 | 6.06E-05 | 0.000589614 |
| ACOT13    | 1640.011613 | -0.336226827 | 0.083848599 | -4.00992777  | 6.07E-05 | 0.000590391 |
| NDST1     | 1486.026136 | 0.306357211  | 0.076412306 | 4.009265355  | 6.09E-05 | 0.000591741 |
| TNFAIP3   | 910.1634369 | 1.036016611  | 0.258466884 | 4.008314706  | 6.12E-05 | 0.000593818 |
| SAMD9     | 80.71200712 | 1.055318771  | 0.263294152 | 4.008136012  | 6.12E-05 | 0.000593958 |
| MYO7B     | 87.85102833 | 0.760547985  | 0.189988733 | 4.003121516  | 6.25E-05 | 0.000606378 |
| RFXAP     | 17.57371706 | -0.660012588 | 0.164888416 | -4.002783241 | 6.26E-05 | 0.00060693  |
| CRYL1     | 406.2862886 | -0.431384139 | 0.107783192 | -4.002332182 | 6.27E-05 | 0.000607772 |
| NAV1      | 65.0271132  | -0.663852351 | 0.16587368  | -4.002156049 | 6.28E-05 | 0.000607909 |
| RPS27A    | 2497.170233 | -0.523337124 | 0.130783842 | -4.00154267  | 6.29E-05 | 0.000609171 |
| ATP6VOD1  | 3149.568947 | -0.289772464 | 0.07244539  | -3.999874463 | 6.34E-05 | 0.000613162 |
| SDS       | 154.711422  | -0.942430983 | 0.235791296 | -3.996886229 | 6.42E-05 | 0.000620629 |
| MLLT11    | 15.00985324 | 1.551285171  | 0.388190987 | 3.996190597  | 6.44E-05 | 0.000622131 |
| MPPE1     | 159.4603418 | -0.349264975 | 0.087429634 | -3.994812272 | 6.47E-05 | 0.000625437 |
| APOE      | 65210.40951 | -0.578682721 | 0.14492024  | -3.993111805 | 6.52E-05 | 0.000629615 |
| CNKSR3    | 5.748564948 | 1.969797489  | 0.493377744 | 3.992473342  | 6.54E-05 | 0.000630986 |
| ZBTB2     | 222.7676749 | 0.37011863   | 0.092715003 | 3.992003671  | 6.55E-05 | 0.00063191  |
| ACBD4     | 60.14999095 | -0.548183041 | 0.137327147 | -3.991803912 | 6.56E-05 | 0.000632116 |
| H2AFZ     | 2655.674567 | -0.402933156 | 0.100949177 | -3.991445667 | 6.57E-05 | 0.000632417 |
| WDFY2     | 200.0989163 | -0.465645841 | 0.116658976 | -3.991513178 | 6.57E-05 | 0.000632417 |
| SPATA12   | 2.958489965 | -2.211917773 | 0.554492608 | -3.989084326 | 6.63E-05 | 0.000638415 |
| AKR1A1    | 2253.280305 | -0.202399365 | 0.050750275 | -3.988143198 | 6.66E-05 | 0.000640622 |
| MAMLD1    | 25.667966   | 1.179741526  | 0.295872552 | 3.987330073  | 6.68E-05 | 0.000642489 |
| SYMPK     | 1447.101205 | 0.352748881  | 0.088492756 | 3.986189354  | 6.71E-05 | 0.000645251 |
| NEXN      | 4.290210372 | 1.68225103   | 0.422250893 | 3.984008221  | 6.78E-05 | 0.00065087  |
| KLHL36    | 262.6439132 | -0.526413205 | 0.132192414 | -3.98217408  | 6.83E-05 | 0.000655576 |
| GALC      | 858.5333882 | -0.692222655 | 0.173854933 | -3.981610672 | 6.84E-05 | 0.000656794 |
| ASB2      | 11.92347203 | -1.021532208 | 0.256703941 | -3.979417703 | 6.91E-05 | 0.000662541 |
| RPS13     | 5020.478433 | -0.504402825 | 0.126763125 | -3.979097417 | 6.92E-05 | 0.000663092 |
| SLC31A1   | 3834.434259 | 0.436934923  | 0.109829698 | 3.97829488   | 6.94E-05 | 0.000664992 |
| PODXL     | 44.62829275 | 1.037341207  | 0.260765156 | 3.978066784  | 6.95E-05 | 0.000665288 |
| BBS9      | 94.43097303 | -0.456813896 | 0.114859341 | -3.97715928  | 6.97E-05 | 0.000667365 |
| HMGA1     | 2110.466992 | 0.596965015  | 0.150101293 | 3.977081102  | 6.98E-05 | 0.000667365 |
| BCAR3     | 396.8135434 | 0.350683333  | 0.088226376 | 3.974812839  | 7.04E-05 | 0.000673411 |
| FERMT3    | 3393.658716 | 0.314950892  | 0.079243657 | 3.974461872  | 7.05E-05 | 0.000674059 |
| BIRC7     | 41.29695325 | -1.203247931 | 0.302850982 | -3.973069269 | 7.10E-05 | 0.000677666 |
| TYRO3     | 6.997500549 | 1.585052873  | 0.399001069 | 3.972552946  | 7.11E-05 | 0.00067879  |
| PNMA1     | 268.7535517 | 0.330724516  | 0.083266472 | 3.971880994  | 7.13E-05 | 0.000680359 |
| PLXNC1    | 195.6050249 | -0.774549617 | 0.195018606 | -3.971670351 | 7.14E-05 | 0.00068047  |
| ZNF101    | 80.76510635 | 0.358361479  | 0.090231047 | 3.971598361  | 7.14E-05 | 0.00068047  |

|          |             |              |             |              |          |             |
|----------|-------------|--------------|-------------|--------------|----------|-------------|
| ARNTL2   | 203.8222296 | 1.302473985  | 0.328128782 | 3.969398777  | 7.21E-05 | 0.000686431 |
| PRPF8    | 2842.930042 | -0.255385483 | 0.064430304 | -3.963747934 | 7.38E-05 | 0.000702533 |
| ISOC1    | 206.7436733 | 0.475436224  | 0.119955534 | 3.963437194  | 7.39E-05 | 0.000703089 |
| SLC9A9   | 104.3388409 | 0.719984313  | 0.181738301 | 3.961654258  | 7.44E-05 | 0.000707999 |
| ZDHHC7   | 651.3714007 | -0.349937439 | 0.088333925 | -3.961529386 | 7.45E-05 | 0.000708008 |
| ACCS     | 14.71556513 | -0.791857733 | 0.199951903 | -3.960241036 | 7.49E-05 | 0.000711476 |
| TMEM176  | 179.4583929 | -0.765518675 | 0.193310781 | -3.960041283 | 7.49E-05 | 0.000711709 |
| DNM1L    | 968.1275197 | 0.291886562  | 0.073721679 | 3.959304316  | 7.52E-05 | 0.000713181 |
| REC8     | 38.5572171  | 0.538724661  | 0.136065106 | 3.95931533   | 7.52E-05 | 0.000713181 |
| TMEM88   | 4.665803718 | 2.161243948  | 0.545884044 | 3.959163072  | 7.52E-05 | 0.00071324  |
| IFFO1    | 294.0876204 | -0.481125944 | 0.121529645 | -3.958918358 | 7.53E-05 | 0.000713608 |
| GNPAT    | 301.35256   | -0.314767647 | 0.079567764 | -3.955969503 | 7.62E-05 | 0.000721735 |
| ITK      | 31.24341874 | 0.815372145  | 0.206109019 | 3.956023609  | 7.62E-05 | 0.000721735 |
| MAST3    | 204.5006555 | -0.401739842 | 0.10161032  | -3.953730718 | 7.69E-05 | 0.000728155 |
| HK1      | 826.100611  | -0.313409172 | 0.079277133 | -3.953336344 | 7.71E-05 | 0.000728987 |
| CTAGE4   | 37.41270923 | 0.883256003  | 0.22350972  | 3.951756562  | 7.76E-05 | 0.000733444 |
| PPFBP1   | 90.26205988 | 0.499834718  | 0.126566327 | 3.949191941  | 7.84E-05 | 0.00074097  |
| LTBP3    | 618.9724052 | 0.595671867  | 0.150871842 | 3.94819775   | 7.87E-05 | 0.000742923 |
| PARP1    | 1370.322439 | -0.30650149  | 0.077629619 | -3.948254453 | 7.87E-05 | 0.000742923 |
| SLC12A6  | 727.3580194 | -0.306990599 | 0.077751831 | -3.94833917  | 7.87E-05 | 0.000742923 |
| ACVR1    | 584.2853981 | 0.377360268  | 0.095605104 | 3.947072393  | 7.91E-05 | 0.000746045 |
| LOC64699 | 6.849867431 | 1.368588301  | 0.346757013 | 3.946822265  | 7.92E-05 | 0.000746447 |
| C1RL-AS1 | 9.412227501 | 0.98963248   | 0.250822427 | 3.945550215  | 7.96E-05 | 0.000750042 |
| ZNF248   | 44.12588028 | -0.519888333 | 0.131817317 | -3.944006341 | 8.01E-05 | 0.000754508 |
| DNTTIP2  | 1209.681291 | 0.246593689  | 0.06253696  | 3.943167215  | 8.04E-05 | 0.000756771 |
| BCS1L    | 119.9777404 | -0.417912789 | 0.105994911 | -3.942762773 | 8.05E-05 | 0.000757667 |
| ATP5B    | 5108.195437 | 0.337713247  | 0.085666758 | 3.94217378   | 8.07E-05 | 0.000759147 |
| ADAM28   | 32.0655292  | -0.910723886 | 0.231124064 | -3.940411354 | 8.13E-05 | 0.000764186 |
| DYNC2H1  | 15.9078159  | -0.848008928 | 0.215211836 | -3.940345211 | 8.14E-05 | 0.000764186 |
| BTG3     | 107.5215633 | 0.860006869  | 0.218284568 | 3.939842737  | 8.15E-05 | 0.000765402 |
| TRIM54   | 20.14462111 | 1.420739995  | 0.360900313 | 3.936654925  | 8.26E-05 | 0.000775247 |
| RAPGEF3  | 176.670056  | -0.460330249 | 0.117042048 | -3.933033084 | 8.39E-05 | 0.000786629 |
| FEM1B    | 1893.403756 | 0.414654782  | 0.105492696 | 3.930649206  | 8.47E-05 | 0.000794071 |
| FLOT1    | 2212.148007 | 0.317825309  | 0.080866647 | 3.930239717  | 8.49E-05 | 0.000795025 |
| CASP10   | 699.3007376 | 0.351085909  | 0.089359938 | 3.928896073  | 8.53E-05 | 0.000799077 |
| INVS     | 214.8442267 | -0.279941269 | 0.071265    | -3.92817329  | 8.56E-05 | 0.00080108  |
| HNRNPA1L | 46.32919948 | -0.55023782  | 0.140092736 | -3.927668449 | 8.58E-05 | 0.00080236  |
| RDX      | 1202.75639  | 0.41920233   | 0.106758041 | 3.926658126  | 8.61E-05 | 0.000805332 |
| DNM2     | 1462.843027 | 0.253148844  | 0.064504203 | 3.924532559  | 8.69E-05 | 0.000812068 |
| ZNF337   | 76.25222926 | -0.418850826 | 0.106759552 | -3.923310081 | 8.73E-05 | 0.000815792 |
| CD226    | 66.24492934 | 0.67408628   | 0.171834238 | 3.922886899  | 8.75E-05 | 0.000816817 |
| COL8A2   | 62.41636368 | 0.765764831  | 0.195289568 | 3.921176332  | 8.81E-05 | 0.000822226 |
| S100A8   | 286.0532698 | -1.021849584 | 0.260839276 | -3.917544932 | 8.95E-05 | 0.00083429  |
| IL36G    | 6.543970335 | 2.062412227  | 0.526877174 | 3.914408004  | 9.06E-05 | 0.000844787 |
| SKAP2    | 1265.045037 | -0.335935533 | 0.08585567  | -3.912793808 | 9.12E-05 | 0.000850031 |
| ZNF700   | 24.61271438 | -0.840073968 | 0.214738558 | -3.91207791  | 9.15E-05 | 0.00085213  |
| VPS35    | 679.2398496 | -0.426334812 | 0.108982951 | -3.911940444 | 9.16E-05 | 0.000852189 |
| GNAQ     | 1253.664353 | -0.281811479 | 0.072049949 | -3.911334881 | 9.18E-05 | 0.000853902 |
| DPH1     | 155.0943109 | -0.30838909  | 0.078885717 | -3.909314645 | 9.26E-05 | 0.000860645 |

|           |             |              |             |              |             |             |
|-----------|-------------|--------------|-------------|--------------|-------------|-------------|
| GPR75     | 3.653896014 | 1.935828665  | 0.495213944 | 3.909075435  | 9.27E-05    | 0.000861068 |
| RNF141    | 154.0039714 | -0.419219445 | 0.107319146 | -3.906287572 | 9.37E-05    | 0.00087019  |
| TMEM55A   | 118.1354827 | -0.398099124 | 0.101912264 | -3.906292635 | 9.37E-05    | 0.00087019  |
| TRIM39    | 177.073668  | 0.251593059  | 0.064525271 | 3.899139906  | 9.65E-05    | 0.000895833 |
| SYP       | 31.20981066 | 0.829364432  | 0.21273289  | 3.898618744  | 9.67E-05    | 0.000897316 |
| SDC2      | 6061.763749 | 0.530131407  | 0.136174661 | 3.893025361  | 9.90E-05    | 0.000917811 |
| TNC       | 8.538063863 | 1.653353069  | 0.424734496 | 3.892674327  | 9.91E-05    | 0.000918683 |
| CYTH4     | 358.3150604 | 0.374555481  | 0.096233809 | 3.892140231  | 9.94E-05    | 0.000920251 |
| ACO2      | 1312.225768 | 0.282931405  | 0.072744803 | 3.889369329  | 0.000100505 | 0.000930358 |
| MTMR10    | 1204.923572 | -0.249340554 | 0.064136359 | -3.887663068 | 0.000101214 | 0.000936456 |
| STRN3     | 357.0075421 | 0.322912865  | 0.083103854 | 3.885654519  | 0.000102055 | 0.000943764 |
| NME3      | 208.4349827 | -0.436913105 | 0.112451905 | -3.885333079 | 0.00010219  | 0.000944545 |
| CARD9     | 166.867873  | -0.416181068 | 0.107143289 | -3.884340975 | 0.000102608 | 0.000947801 |
| FOS       | 524.2115081 | -0.543121061 | 0.139826279 | -3.884255987 | 0.000102644 | 0.000947801 |
| NAPSB     | 39.92221219 | -1.221832091 | 0.314622584 | -3.883485018 | 0.00010297  | 0.000950342 |
| HS2ST1    | 284.488442  | -0.321521639 | 0.08281811  | -3.882262434 | 0.000103489 | 0.000954661 |
| NDUFV2    | 603.5469567 | 0.310426366  | 0.079972768 | 3.881650895  | 0.00010375  | 0.000956592 |
| GZF1      | 162.7781359 | -0.298699678 | 0.077001626 | -3.879134668 | 0.000104829 | 0.000966062 |
| ZNF814    | 96.9385395  | -0.35508058  | 0.091541439 | -3.878905371 | 0.000104928 | 0.000966495 |
| IRF2BP2   | 1389.275293 | -0.400301468 | 0.103248027 | -3.87708589  | 0.000105715 | 0.000973268 |
| BIVM      | 65.66169922 | -0.468045508 | 0.120848868 | -3.872982145 | 0.000107512 | 0.00098932  |
| CPNE6     | 13.99268016 | 1.413875513  | 0.365279997 | 3.870662296  | 0.00010854  | 0.00099829  |
| PRPF38B   | 422.43568   | -0.253617043 | 0.065543254 | -3.869460677 | 0.000109076 | 0.001002728 |
| MRPS6     | 4596.880526 | 0.327643461  | 0.084733534 | 3.866750821  | 0.000110295 | 0.001013431 |
| MIER1     | 669.380954  | 0.259316564  | 0.067086884 | 3.865383942  | 0.000110915 | 0.001018621 |
| C4A       | 17.6831386  | 1.104068079  | 0.285833001 | 3.862633338  | 0.000112171 | 0.001029284 |
| NME4      | 105.7707852 | -0.771365489 | 0.199701046 | -3.862601151 | 0.000112186 | 0.001029284 |
| ZBTB44    | 212.9770231 | -0.270990753 | 0.07017643  | -3.861563663 | 0.000112664 | 0.001032648 |
| ZNF69     | 17.38083949 | -1.013606243 | 0.262482009 | -3.861621777 | 0.000112637 | 0.001032648 |
| SLC11A1   | 3221.876338 | 0.367091315  | 0.095080101 | 3.860863742  | 0.000112987 | 0.001035102 |
| GMFG      | 707.4590451 | -0.283866131 | 0.073563342 | -3.858798745 | 0.000113946 | 0.001043373 |
| DAPK1     | 3697.036235 | -0.264568633 | 0.068574218 | -3.858135601 | 0.000114255 | 0.001045694 |
| LOC72819C | 16.5178049  | -0.812023002 | 0.210479392 | -3.857969157 | 0.000114333 | 0.001045892 |
| CDKL1     | 53.19645954 | 0.526263347  | 0.136432509 | 3.857316341  | 0.000114639 | 0.001048174 |
| FRK       | 9.161091358 | -1.152706011 | 0.298895024 | -3.856558048 | 0.000114995 | 0.001050399 |
| RASAL1    | 7.650005801 | -1.792774854 | 0.464851774 | -3.856659164 | 0.000114947 | 0.001050399 |
| SPTLC2    | 610.4612137 | 0.287677753  | 0.074606123 | 3.855953654  | 0.000115279 | 0.001052172 |
| TBXA2R    | 10.3006993  | 0.938048825  | 0.243275871 | 3.855905733  | 0.000115302 | 0.001052172 |
| ITPK1     | 2958.267886 | -0.480328359 | 0.124580335 | -3.855571254 | 0.00011546  | 0.001053096 |
| AP2A2     | 668.0576004 | -0.388194563 | 0.100764101 | -3.852508569 | 0.000116914 | 0.001065838 |
| RASD1     | 9.294107318 | 1.235268294  | 0.320703009 | 3.851751489  | 0.000117276 | 0.001068617 |
| SLC43A1   | 11.34644791 | -1.268045159 | 0.329231913 | -3.851525657 | 0.000117384 | 0.00106908  |
| DHX8      | 297.0862366 | 0.306875274  | 0.079679601 | 3.851365619  | 0.000117461 | 0.001069256 |
| BRPF3     | 256.6806668 | 0.279736425  | 0.072639843 | 3.851005366  | 0.000117634 | 0.001070308 |
| PTPN7     | 288.2004753 | 0.359911669  | 0.093513914 | 3.848749923  | 0.000118722 | 0.001079682 |
| DCTN3     | 436.3246646 | -0.203720194 | 0.052948001 | -3.847552114 | 0.000119304 | 0.001084443 |
| CYFIP2    | 254.0586812 | -0.428676143 | 0.111419632 | -3.847402263 | 0.000119377 | 0.001084578 |
| TRIM22    | 2069.032489 | 0.461542539  | 0.119990741 | 3.846484605  | 0.000119825 | 0.001088115 |
| CCDC50    | 840.2795409 | 0.41342317   | 0.107508194 | 3.845503823  | 0.000120305 | 0.001091945 |

|           |             |              |             |              |             |             |
|-----------|-------------|--------------|-------------|--------------|-------------|-------------|
| LOC100134 | 57.23634222 | -0.633911257 | 0.164921195 | -3.843722201 | 0.000121182 | 0.001098836 |
| SYNJ2BP   | 151.6379456 | -0.326795659 | 0.085019419 | -3.84377669  | 0.000121155 | 0.001098836 |
| SLC43A2   | 1772.599706 | 0.415258874  | 0.108043131 | 3.843454658  | 0.000121314 | 0.0010995   |
| EHF       | 63.96722959 | 0.903431033  | 0.235136671 | 3.84215286   | 0.00012196  | 0.001104813 |
| EIF4B     | 938.5068882 | -0.872315255 | 0.227052852 | -3.841903981 | 0.000122084 | 0.001105396 |
| CYP1B1    | 1517.401013 | 0.561264467  | 0.146165648 | 3.839920498  | 0.000123074 | 0.001113824 |
| SLC19A1   | 45.28741517 | -0.746907738 | 0.194539631 | -3.839360308 | 0.000123355 | 0.001115826 |
| ARMC7     | 181.2043682 | -0.436673797 | 0.113773276 | -3.838105171 | 0.000123987 | 0.001121    |
| ARHGAP2C  | 9.853691513 | 1.776592232  | 0.463090097 | 3.836385715  | 0.000124858 | 0.001127249 |
| NUP107    | 260.6526564 | 0.272737596  | 0.071092395 | 3.836382164  | 0.00012486  | 0.001127249 |
| USP4      | 497.9440107 | 0.248465591  | 0.064762401 | 3.836571658  | 0.000124764 | 0.001127249 |
| CTNS      | 583.3619949 | 0.471435625  | 0.123038246 | 3.831618537  | 0.000127303 | 0.001148748 |
| NDUFA7    | 638.3576266 | 0.215527545  | 0.056256387 | 3.831165812  | 0.000127538 | 0.001150307 |
| PLEC      | 636.0259896 | 0.35176254   | 0.09188411  | 3.828328337  | 0.000129017 | 0.001162749 |
| PSMD11    | 2218.232131 | 0.397073437  | 0.103721104 | 3.828280097  | 0.000129042 | 0.001162749 |
| LAMA1     | 30.48488586 | -0.749656891 | 0.195851957 | -3.827671183 | 0.000129361 | 0.001165066 |
| SPATA13   | 390.3757121 | 0.495854131  | 0.129576642 | 3.826724663  | 0.00012986  | 0.001168988 |
| PDSS1     | 129.3068616 | 0.404168925  | 0.105627725 | 3.826352656  | 0.000130056 | 0.001170189 |
| EGLN1     | 494.8812351 | -0.349284621 | 0.09133618  | -3.824164961 | 0.000131216 | 0.001180045 |
| RBCK1     | 443.1595206 | 0.425998747  | 0.111399924 | 3.824048801  | 0.000131278 | 0.001180045 |
| KCTD12    | 1013.394941 | -0.396872072 | 0.10378726  | -3.823899688 | 0.000131357 | 0.00118019  |
| HEATR3    | 316.2642599 | -0.258213317 | 0.067535538 | -3.82336951  | 0.00013164  | 0.001181592 |
| TUBGCP3   | 537.1186055 | -0.183510938 | 0.047996697 | -3.823407608 | 0.00013162  | 0.001181592 |
| DOK3      | 440.7712546 | -0.430793563 | 0.112685855 | -3.822960426 | 0.000131859 | 0.001182985 |
| MFSD1     | 2512.972674 | -0.214431943 | 0.056093523 | -3.82275761  | 0.000131967 | 0.001183389 |
| ATP13A1   | 607.1612576 | 0.370628125  | 0.096995298 | 3.821093734  | 0.000132861 | 0.001190829 |
| SCIN      | 84.71424115 | -0.568306295 | 0.14875016  | -3.820542413 | 0.000133159 | 0.001192921 |
| PRPF4B    | 848.4309084 | 0.253335882  | 0.066318472 | 3.819989743  | 0.000133457 | 0.001195023 |
| ALPK3     | 139.3064269 | 0.570740864  | 0.149484617 | 3.818057494  | 0.000134507 | 0.00120384  |
| DGKG      | 13.91814107 | -1.080103127 | 0.282912025 | -3.817805647 | 0.000134644 | 0.001204491 |
| TBC1D22A  | 288.0970043 | -0.209885644 | 0.055000786 | -3.816048064 | 0.000135606 | 0.001212516 |
| AMDHD2    | 429.8325184 | -0.370102463 | 0.09701185  | -3.815023249 | 0.00013617  | 0.001216975 |
| ZNF516    | 101.430444  | -0.38293252  | 0.100423123 | -3.813190696 | 0.000137184 | 0.001225451 |
| SNX18     | 364.7418497 | -0.36555804  | 0.095884697 | -3.812475301 | 0.000137582 | 0.001228415 |
| LIPN      | 15.17024582 | -1.440486306 | 0.377931316 | -3.811502902 | 0.000138124 | 0.001232423 |
| RRBP1     | 3249.885745 | 0.4540473    | 0.119127691 | 3.811433733  | 0.000138163 | 0.001232423 |
| RSPO3     | 104.5658674 | 1.267114787  | 0.332564039 | 3.810137715  | 0.000138889 | 0.001238309 |
| ABCC1     | 807.7064105 | 0.39539298   | 0.103779886 | 3.809919194  | 0.000139012 | 0.001238811 |
| FGF13     | 4.932957365 | 2.001426091  | 0.52543129  | 3.809110974  | 0.000139467 | 0.001242273 |
| SIRPB2    | 108.9342874 | -0.662282391 | 0.173922163 | -3.807924064 | 0.000140138 | 0.001247653 |
| EXOC3     | 377.9203467 | -0.348106183 | 0.091469159 | -3.805721913 | 0.000141391 | 0.001258206 |
| BTBD9     | 229.5389065 | 0.253954217  | 0.066744295 | 3.804882738  | 0.000141871 | 0.001261507 |
| ZNF780A   | 313.4101803 | -0.38165629  | 0.100308181 | -3.804837115 | 0.000141898 | 0.001261507 |
| TMSB10    | 27375.4184  | 0.331392002  | 0.087101285 | 3.804674073  | 0.000141991 | 0.001261736 |
| HEY1      | 13.33321976 | 2.120995123  | 0.557635737 | 3.80354949   | 0.000142637 | 0.001266876 |
| NDEL1     | 281.9700708 | 0.30176907   | 0.079349142 | 3.803053951  | 0.000142923 | 0.00126881  |
| KIAA1467  | 90.14698973 | 0.523449267  | 0.137713761 | 3.800994624  | 0.000144116 | 0.001278793 |
| DPYD      | 605.8292163 | -0.270765996 | 0.071279031 | -3.79867675  | 0.000145471 | 0.001290195 |
| CELSR2    | 4.560959442 | -1.582835337 | 0.41682705  | -3.797343134 | 0.000146255 | 0.001296537 |

|           |             |              |             |              |             |             |
|-----------|-------------|--------------|-------------|--------------|-------------|-------------|
| STIP1     | 3822.494394 | 0.210526623  | 0.055445791 | 3.796981166  | 0.000146469 | 0.001297813 |
| CHD3      | 134.6632991 | -0.375668278 | 0.09894424  | -3.79676754  | 0.000146595 | 0.001298272 |
| SLC46A2   | 83.15619879 | -0.749735471 | 0.197472486 | -3.796657876 | 0.00014666  | 0.001298272 |
| NOA1      | 309.2820541 | -0.325102677 | 0.085650056 | -3.795708846 | 0.000147222 | 0.00130263  |
| SLC38A6   | 1719.799972 | -0.379007414 | 0.099899207 | -3.793898119 | 0.000148301 | 0.001311548 |
| FZD4      | 16.91180384 | 1.204966263  | 0.317626452 | 3.793658414  | 0.000148444 | 0.001312193 |
| CBX6      | 101.5571033 | 0.51843225   | 0.136673798 | 3.793208782  | 0.000148713 | 0.001313949 |
| ACP1      | 1192.42428  | -0.139498314 | 0.036781487 | -3.792623043 | 0.000149064 | 0.001316429 |
| GRHL1     | 58.47457871 | 0.617408877  | 0.162798744 | 3.792467077  | 0.000149158 | 0.001316632 |
| HAUS4     | 168.7387157 | -0.463144279 | 0.122129295 | -3.792245585 | 0.000149291 | 0.001317184 |
| ALCAM     | 2033.058685 | 0.322292037  | 0.084991237 | 3.792061985  | 0.000149402 | 0.001317534 |
| C5orf20   | 15.0303213  | -1.477029447 | 0.389887901 | -3.788343891 | 0.000151655 | 0.001336772 |
| HIF1A     | 3718.28755  | -0.476624447 | 0.125820773 | -3.788122083 | 0.00015179  | 0.001337333 |
| SPAG1     | 34.1690129  | 0.727967952  | 0.192236511 | 3.786835026  | 0.000152578 | 0.001343641 |
| DCUN1D4   | 82.49767448 | -0.622388088 | 0.164445269 | -3.784773452 | 0.000153849 | 0.001353549 |
| TPRG1     | 555.6857886 | 0.354639262  | 0.093700177 | 3.784830227  | 0.000153814 | 0.001353549 |
| SDHD      | 1459.699773 | 0.317372786  | 0.083879199 | 3.783688779  | 0.000154521 | 0.001358822 |
| LOC72874: | 43.34412602 | 0.642951449  | 0.16998359  | 3.782432463  | 0.000155303 | 0.001365057 |
| ASB13     | 101.1378575 | -0.546511338 | 0.144500948 | -3.78206057  | 0.000155536 | 0.00136581  |
| IDI1      | 381.1776325 | 0.537231184  | 0.142044715 | 3.782127235  | 0.000155494 | 0.00136581  |
| CCNY      | 1079.205612 | -0.238794737 | 0.063171159 | -3.780122807 | 0.000156751 | 0.001375835 |
| ARL5A     | 222.611304  | -0.410895071 | 0.108724662 | -3.779226016 | 0.000157317 | 0.001380149 |
| CCND3     | 739.0072917 | 0.484550663  | 0.128303859 | 3.776586815  | 0.000158992 | 0.001394193 |
| PLAC8     | 92.44949121 | -0.968954735 | 0.256640521 | -3.775532912 | 0.000159666 | 0.001399443 |
| MAP3K7    | 204.0191033 | 0.293010665  | 0.077617913 | 3.775039222  | 0.000159982 | 0.001401558 |
| FKBP5     | 821.8852851 | 0.384611958  | 0.10189098  | 3.774739997  | 0.000160175 | 0.001402582 |
| OSGIN2    | 893.1500991 | 0.267258107  | 0.070811217 | 3.774234051  | 0.0001605   | 0.001404658 |
| SCN11A    | 24.07488294 | -0.552751379 | 0.146457689 | -3.774136969 | 0.000160563 | 0.001404658 |
| DVL3      | 1004.268879 | -0.377587131 | 0.10016822  | -3.769530223 | 0.000163555 | 0.001430167 |
| TEX261    | 634.4999027 | -0.252006314 | 0.066883524 | -3.767838434 | 0.000164667 | 0.001439216 |
| HP1BP3    | 1285.193628 | -0.192641626 | 0.051147962 | -3.766359775 | 0.000165645 | 0.001447084 |
| MTIF3     | 779.3914371 | -0.214464938 | 0.056962655 | -3.765009511 | 0.000166543 | 0.001454244 |
| NFE2L2    | 1670.455607 | 0.234428693  | 0.062293509 | 3.763292481  | 0.000167691 | 0.001463584 |
| CSGALNAC  | 757.1399454 | 0.248497398  | 0.066056355 | 3.761899928  | 0.000168628 | 0.00147107  |
| TMEM52    | 3.665794738 | 2.075979848  | 0.551884273 | 3.761621682  | 0.000168815 | 0.001472018 |
| RBMS1     | 1212.98381  | 0.323229154  | 0.08593288  | 3.761414199  | 0.000168955 | 0.001472551 |
| COPG1     | 2114.923311 | 0.232170603  | 0.061734375 | 3.760799438  | 0.000169371 | 0.001475485 |
| ABCA6     | 7.43472876  | 1.656242264  | 0.440495829 | 3.759949939  | 0.000169947 | 0.001479534 |
| AP1B1     | 2676.023455 | -0.291088512 | 0.077419623 | -3.759880241 | 0.000169995 | 0.001479534 |
| C20orf111 | 376.8919755 | 0.266957094  | 0.071032763 | 3.758224839  | 0.000171123 | 0.001488659 |
| USP11     | 653.0755688 | 0.38809589   | 0.1033031   | 3.756865861  | 0.000172055 | 0.001496065 |
| FAM211A   | 72.16995197 | -0.559768004 | 0.149036325 | -3.755916578 | 0.000172708 | 0.001500347 |
| PXMP2     | 60.52399181 | -0.447363883 | 0.119105838 | -3.756019777 | 0.000172637 | 0.001500347 |
| ARHGAP6   | 115.7427505 | -0.506239587 | 0.134801821 | -3.755435821 | 0.00017304  | 0.00150253  |
| RELA      | 816.418168  | 0.340716978  | 0.090735278 | 3.755066213  | 0.000173296 | 0.001504048 |
| FTSJD2    | 303.23658   | 0.450878614  | 0.120115728 | 3.753701716  | 0.000174242 | 0.001511559 |
| GSTK1     | 1726.16015  | -0.260166599 | 0.069322952 | -3.752964823 | 0.000174755 | 0.001515306 |
| DPP4      | 39.15603197 | 0.965296327  | 0.257235422 | 3.752579333  | 0.000175024 | 0.001516227 |
| DYNC1LI2  | 218.5725086 | 0.223155149  | 0.059466739 | 3.752604465  | 0.000175007 | 0.001516227 |

|           |             |              |             |              |             |             |
|-----------|-------------|--------------|-------------|--------------|-------------|-------------|
| PRSS22    | 25.1790385  | 1.0166587    | 0.270938877 | 3.752354446  | 0.000175182 | 0.001516883 |
| PTX3      | 8.69969312  | 1.359413405  | 0.362313308 | 3.752038297  | 0.000175403 | 0.001518093 |
| RBM43     | 32.50220001 | 0.659786009  | 0.175869483 | 3.751566201  | 0.000175733 | 0.001520248 |
| AMZ1      | 100.0234126 | 1.082971319  | 0.288748317 | 3.750571882  | 0.000176432 | 0.001525582 |
| CA13      | 46.56784335 | -0.553182    | 0.147541361 | -3.749335088 | 0.000177304 | 0.001532414 |
| GNA15     | 1048.142584 | 0.299457808  | 0.079976579 | 3.74431877   | 0.000180884 | 0.001562201 |
| ZNF624    | 52.29532164 | -0.371964167 | 0.099342209 | -3.744271156 | 0.000180918 | 0.001562201 |
| FRG1      | 486.7168915 | 0.300396831  | 0.080270869 | 3.742289508  | 0.000182351 | 0.001573846 |
| NEIL2     | 40.02593293 | -0.685168436 | 0.183114856 | -3.741741384 | 0.00018275  | 0.001576553 |
| HOOK3     | 617.0774265 | -0.293950044 | 0.078628508 | -3.738466529 | 0.000185146 | 0.001596489 |
| SEC31B    | 4.298983299 | -1.607315406 | 0.430134779 | -3.736771549 | 0.000186398 | 0.001606542 |
| CAV2      | 6.155324588 | 1.548511625  | 0.41445293  | 3.736278626  | 0.000186764 | 0.001608948 |
| CDK3      | 32.40972723 | 0.605929943  | 0.16219743  | 3.735755501  | 0.000187152 | 0.001611552 |
| DLST      | 581.2754412 | 0.275544177  | 0.073828213 | 3.732234145  | 0.000189789 | 0.0016335   |
| MED20     | 62.07869182 | -0.329111517 | 0.088195989 | -3.731592785 | 0.000190273 | 0.001636909 |
| RPS21     | 3413.275033 | -0.352992775 | 0.094608168 | -3.731102548 | 0.000190644 | 0.001639341 |
| CAB39     | 565.5960859 | -0.255870339 | 0.06858185  | -3.730875409 | 0.000190816 | 0.001640063 |
| TNFRSF10C | 42.72411509 | -0.515833129 | 0.138281777 | -3.730304454 | 0.000191249 | 0.001643027 |
| RPS19     | 7293.075818 | -0.273462435 | 0.073312923 | -3.730071371 | 0.000191426 | 0.00164379  |
| GPR156    | 6.273160635 | 1.647458807  | 0.441759748 | 3.72930946   | 0.000192005 | 0.001648008 |
| USP25     | 940.1611838 | 0.249938433  | 0.067041017 | 3.728142022  | 0.000192897 | 0.001654897 |
| CDK19     | 437.717099  | -0.229093359 | 0.061456931 | -3.727705796 | 0.000193231 | 0.001656238 |
| TMEM194I  | 33.02396031 | 0.565803753  | 0.151778728 | 3.727819835  | 0.000193143 | 0.001656238 |
| ZBTB10    | 54.96416015 | 0.405011806  | 0.108673082 | 3.726882477  | 0.000193863 | 0.001660892 |
| LINC00649 | 26.86388955 | 0.924905499  | 0.248332236 | 3.724468128  | 0.000195727 | 0.001676096 |
| FGD6      | 295.8392365 | 0.331774472  | 0.089110846 | 3.723166002  | 0.00019674  | 0.001683994 |
| HIVEP1    | 310.1248037 | 0.383057818  | 0.10292799  | 3.721609834  | 0.000197957 | 0.00169363  |
| FES       | 97.54607005 | -0.549951427 | 0.147798744 | -3.720947895 | 0.000198476 | 0.001696518 |
| MUCL1     | 9.878488299 | 1.453710987  | 0.39067163  | 3.721055934  | 0.000198391 | 0.001696518 |
| ZKSCAN4   | 60.67713495 | -0.478567022 | 0.128769038 | -3.716475861 | 0.000202021 | 0.001726024 |
| WDFY1     | 746.9795611 | 0.398723503  | 0.107291517 | 3.716263095  | 0.000202191 | 0.001726686 |
| PABPC3    | 423.9844078 | -0.363188357 | 0.097746965 | -3.715597287 | 0.000202724 | 0.001730446 |
| ANAPC7    | 579.1083217 | -0.214059937 | 0.057632121 | -3.714247101 | 0.00020381  | 0.001738914 |
| LARP4     | 532.6978527 | 0.179257023  | 0.048264913 | 3.714023554  | 0.00020399  | 0.001739655 |
| HLA-DOA   | 887.5277412 | -0.493050709 | 0.132764367 | -3.713727714 | 0.000204229 | 0.001740894 |
| XRN1      | 182.1319006 | 0.654361412  | 0.176264543 | 3.712382534  | 0.000205317 | 0.001749375 |
| JUN       | 8.092521304 | 1.23440098   | 0.332525163 | 3.712203212  | 0.000205463 | 0.001749815 |
| SEMA4B    | 135.5684835 | 0.386667729  | 0.104178034 | 3.711605146  | 0.000205949 | 0.001753155 |
| HSD3BP4   | 41.26219401 | 0.818765384  | 0.220689526 | 3.710032814  | 0.000207232 | 0.001763273 |
| RPS28     | 5576.219844 | -0.329569335 | 0.088917308 | -3.706470004 | 0.000210168 | 0.001787436 |
| ACPP      | 13.73366092 | -0.896494422 | 0.241964612 | -3.705064205 | 0.000211337 | 0.001796559 |
| PRKDC     | 1138.253999 | -0.208285461 | 0.056242392 | -3.703353547 | 0.000212768 | 0.001807898 |
| TNFAIP8   | 597.3531782 | 0.378805725  | 0.102314977 | 3.702348744  | 0.000213613 | 0.001814248 |
| LOC93622  | 28.24234491 | -0.636456662 | 0.171949471 | -3.70141681  | 0.000214399 | 0.001820096 |
| NIN       | 321.5964907 | -0.312221298 | 0.084356154 | -3.701227283 | 0.000214559 | 0.001820626 |
| EIF4A1    | 20437.51699 | 0.285856247  | 0.077242486 | 3.700764473  | 0.000214951 | 0.00182312  |
| RABIF     | 497.2664615 | 0.179579554  | 0.048537497 | 3.699810796  | 0.00021576  | 0.001829152 |
| WDHD1     | 33.62842175 | 0.673780585  | 0.182129858 | 3.699451554  | 0.000216066 | 0.00183091  |
| ZFP106    | 846.4821996 | -0.327800433 | 0.088675074 | -3.696646864 | 0.000218466 | 0.001850406 |

|           |             |              |             |              |             |             |
|-----------|-------------|--------------|-------------|--------------|-------------|-------------|
| CCDC176   | 8.319234144 | -1.355187341 | 0.366762954 | -3.694995166 | 0.000219891 | 0.00186163  |
| LST1      | 599.1576163 | -0.570085293 | 0.154297639 | -3.694711715 | 0.000220136 | 0.001862862 |
| GBGT1     | 289.2090538 | -0.286143264 | 0.077461035 | -3.694028413 | 0.000220729 | 0.00186703  |
| AZU1      | 3.238199418 | -2.96892443  | 0.804110196 | -3.692186025 | 0.000222335 | 0.001879757 |
| CTAGE9    | 53.69506626 | 0.88770563   | 0.240449275 | 3.691862369  | 0.000222618 | 0.00188057  |
| FXYD2     | 37.10551051 | 0.915010391  | 0.247846337 | 3.691845525  | 0.000222633 | 0.00188057  |
| SIAH2     | 208.5205334 | 0.360217884  | 0.097587906 | 3.691214408  | 0.000223186 | 0.001884389 |
| ATP13A2   | 507.0060628 | -0.379150214 | 0.102730619 | -3.690722547 | 0.000223618 | 0.001887182 |
| EZH2      | 55.29467578 | 0.854971371  | 0.231687574 | 3.690190879  | 0.000224086 | 0.001890274 |
| R3HDM2    | 322.7883597 | -0.295561853 | 0.080106014 | -3.689633747 | 0.000224577 | 0.001893561 |
| ARHGAP32  | 58.7592258  | -0.485226494 | 0.131715052 | -3.683910721 | 0.000229683 | 0.001935734 |
| PKI55     | 51.2403265  | -0.842936509 | 0.228851127 | -3.683339993 | 0.000230198 | 0.001939198 |
| ABCG1     | 77.11110642 | -0.72773518  | 0.197676217 | -3.681450354 | 0.000231911 | 0.001952747 |
| LINC00239 | 5.863269566 | -1.342875295 | 0.364822391 | -3.680901524 | 0.000232411 | 0.001956071 |
| LDLRAD4   | 30.69041746 | -0.837504856 | 0.227550956 | -3.680515656 | 0.000232763 | 0.00195815  |
| ING4      | 114.2664757 | -0.323888587 | 0.088005634 | -3.680316486 | 0.000232945 | 0.001958795 |
| CNN2      | 1395.834087 | -0.41886721  | 0.113820346 | -3.680073232 | 0.000233167 | 0.001959781 |
| CCDC86    | 271.3473359 | -0.231552054 | 0.062923737 | -3.679884047 | 0.000233334 | 0.001960351 |
| RDH12     | 12.95462514 | -0.821797136 | 0.223351019 | -3.679397292 | 0.000233786 | 0.001963211 |
| CTNNB1    | 5782.002663 | -0.269706437 | 0.073356439 | -3.676656618 | 0.000236311 | 0.00198352  |
| GSG1      | 7.098996977 | 1.265075083  | 0.344279442 | 3.674558885  | 0.000238261 | 0.001998987 |
| HLA-H     | 5.294106899 | 1.843263521  | 0.502007209 | 3.671786952  | 0.00024086  | 0.002019131 |
| RAD23B    | 1273.044418 | 0.24991979   | 0.068065247 | 3.671767908  | 0.000240878 | 0.002019131 |
| LDHAL6B   | 89.47603799 | 0.373809498  | 0.101817965 | 3.671351096  | 0.000241272 | 0.002021518 |
| NCF1B     | 747.4708719 | 0.59100609   | 0.161049933 | 3.669707136  | 0.000242829 | 0.002033648 |
| PMEPA1    | 84.9289708  | 0.619818183  | 0.168921171 | 3.669274729  | 0.00024324  | 0.002036175 |
| EIF4G3    | 738.5576153 | -0.249274577 | 0.067955946 | -3.668179036 | 0.000244284 | 0.002044001 |
| FIG4      | 1286.949583 | -0.419420613 | 0.114353473 | -3.667755796 | 0.000244689 | 0.002046467 |
| PRKD2     | 192.1220209 | 0.318840389  | 0.086976938 | 3.665803784  | 0.000246563 | 0.002061217 |
| LAPTM5    | 43896.68671 | -0.236153877 | 0.064449107 | -3.664191608 | 0.000248121 | 0.002073312 |
| FAM125B   | 204.6686965 | 0.406306521  | 0.110968406 | 3.661461289  | 0.000250781 | 0.002094598 |
| VMO1      | 779.5622681 | -0.315718498 | 0.086256394 | -3.66023298  | 0.000251986 | 0.002103722 |
| UAP1      | 229.9322203 | 0.337625704  | 0.092245851 | 3.660063838  | 0.000252152 | 0.002104168 |
| IL2RG     | 2212.859267 | 0.539729721  | 0.147523898 | 3.658591768  | 0.000253605 | 0.002114396 |
| RPIA      | 344.6493748 | 0.483394701  | 0.132124359 | 3.658634204  | 0.000253563 | 0.002114396 |
| ITGBL1    | 6.601776934 | 1.956705868  | 0.534957178 | 3.657686912  | 0.000254502 | 0.002119975 |
| MPST      | 192.3714962 | -0.359165738 | 0.098194206 | -3.657708067 | 0.000254481 | 0.002119975 |
| ALDH2     | 13586.68698 | -0.303329803 | 0.082975508 | -3.655654687 | 0.000256526 | 0.002135887 |
| PSMC3     | 1703.089933 | 0.328458966  | 0.089925772 | 3.652556526  | 0.000259642 | 0.002160865 |
| LTB4R     | 5.949832904 | -1.49655772  | 0.410079448 | -3.649433614 | 0.000262819 | 0.002186327 |
| SLC17A7   | 14.58135857 | -0.869089658 | 0.238295694 | -3.647106013 | 0.000265211 | 0.002205236 |
| CYCS      | 1703.51774  | 0.372674268  | 0.102194091 | 3.646730085  | 0.000265599 | 0.002207478 |
| APOBEC3D  | 11.71199355 | 1.010314585  | 0.277103891 | 3.64597762   | 0.000266377 | 0.002212961 |
| KIAA0226  | 889.7341446 | 0.291474784  | 0.079967488 | 3.644916099  | 0.000267479 | 0.002221125 |
| LRRC6     | 41.28217222 | -0.606588156 | 0.166432314 | -3.644653738 | 0.000267752 | 0.002222402 |
| TMEM150I  | 1630.144728 | 0.370696809  | 0.10171992  | 3.644289228  | 0.000268132 | 0.002224562 |
| ATP1B1    | 2673.849112 | 0.225596725  | 0.061934124 | 3.642527111  | 0.000269975 | 0.002238854 |
| MPZL1     | 376.0616445 | 0.596026811  | 0.16382904  | 3.638102329  | 0.000274654 | 0.00227665  |
| DNAJC3    | 2159.639921 | 0.474682291  | 0.130512806 | 3.637055295  | 0.000275773 | 0.002284904 |

|           |             |              |             |              |             |             |
|-----------|-------------|--------------|-------------|--------------|-------------|-------------|
| RPL19     | 6278.929053 | -0.278161359 | 0.076493316 | -3.636413906 | 0.00027646  | 0.00228958  |
| ELL       | 162.9756754 | 0.474923744  | 0.130609969 | 3.636198269  | 0.000276691 | 0.002289809 |
| RASSF3    | 916.067083  | -0.309798578 | 0.0851994   | -3.636159134 | 0.000276733 | 0.002289809 |
| TNNI2     | 291.6092973 | -0.663623164 | 0.182520725 | -3.635878404 | 0.000277035 | 0.002291287 |
| MRI1      | 126.1351288 | -0.369083274 | 0.101585579 | -3.633225073 | 0.000279901 | 0.002313961 |
| CEP85L    | 36.39628633 | -0.440736713 | 0.121407523 | -3.630225715 | 0.000283173 | 0.00233998  |
| RRP12     | 402.4094591 | 0.459424535  | 0.126585273 | 3.629367957  | 0.000284116 | 0.002346728 |
| CNTRL     | 178.1448556 | -0.335769061 | 0.092541311 | -3.628315382 | 0.000285277 | 0.00235527  |
| ADK       | 54.59974724 | -0.699915462 | 0.193079841 | -3.625005386 | 0.000288955 | 0.002384586 |
| SLC22A5   | 202.6876223 | -0.322810406 | 0.089073954 | -3.624071821 | 0.000290001 | 0.002392155 |
| LSM10     | 220.6013933 | -0.2784982   | 0.076872348 | -3.622865797 | 0.000291357 | 0.002401215 |
| MICAL2    | 181.3757863 | 0.715702241  | 0.197545748 | 3.622969607  | 0.00029124  | 0.002401215 |
| DNAJC4    | 381.3686457 | -0.279048049 | 0.077029417 | -3.622616675 | 0.000291638 | 0.002402467 |
| PRPF3     | 27.71859127 | 0.958161455  | 0.264539262 | 3.622000932  | 0.000292333 | 0.00240713  |
| PGM3      | 34.88256364 | 0.626080301  | 0.172900903 | 3.621035464  | 0.000293426 | 0.002415064 |
| ZNF33A    | 171.8341755 | -0.402202777 | 0.111082318 | -3.620763277 | 0.000293735 | 0.002416539 |
| CCDC147   | 6.013212318 | 1.432785526  | 0.395749105 | 3.620439083  | 0.000294103 | 0.002418502 |
| CEBPD     | 189.8353821 | -0.687713107 | 0.189993671 | -3.619663241 | 0.000294987 | 0.002424694 |
| PI3       | 4.059780876 | 2.814161201  | 0.777565758 | 3.619193842  | 0.000295522 | 0.002428025 |
| SLC9A7    | 1013.10094  | 0.33539277   | 0.09267632  | 3.618969451  | 0.000295779 | 0.00242906  |
| PPAP2A    | 156.1801292 | -0.408393925 | 0.112865339 | -3.618417555 | 0.00029641  | 0.002433173 |
| SNHG15    | 24.88075388 | 0.577363682  | 0.159695814 | 3.615396465  | 0.000299888 | 0.002460642 |
| IQSEC2    | 77.45912486 | -0.486685764 | 0.134646491 | -3.614544722 | 0.000300876 | 0.002467659 |
| WDR17     | 6.356402468 | -1.38447474  | 0.383073507 | -3.614122915 | 0.000301366 | 0.002470592 |
| PPIP5K1   | 199.0581271 | -0.392129206 | 0.108530821 | -3.613067713 | 0.000302596 | 0.002479581 |
| OPTN      | 1005.897793 | 0.862853659  | 0.238849594 | 3.612539775  | 0.000303213 | 0.002483544 |
| PEF1      | 712.9968843 | 0.270594721  | 0.074921562 | 3.611706887  | 0.000304188 | 0.002490441 |
| SMAD5     | 220.6796198 | -0.28054074  | 0.077717774 | -3.609737213 | 0.000306507 | 0.002508326 |
| SMOX      | 53.49873954 | 0.753277074  | 0.208871855 | 3.606407741  | 0.000310465 | 0.0025396   |
| USP28     | 256.8667048 | 0.271357393  | 0.075267125 | 3.60525786   | 0.000311843 | 0.002549752 |
| EYA3      | 644.3538608 | 0.385802596  | 0.107019488 | 3.60497517   | 0.000312183 | 0.002550291 |
| SSBP3     | 532.9480321 | 0.360249908  | 0.099930864 | 3.604991421  | 0.000312163 | 0.002550291 |
| HPGDS     | 384.4545785 | -0.564975402 | 0.156738524 | -3.604572689 | 0.000312667 | 0.002552827 |
| INF2      | 811.5368887 | 0.242577861  | 0.067298813 | 3.604489452  | 0.000312767 | 0.002552827 |
| MLEC      | 738.0374588 | -0.485717473 | 0.134792128 | -3.603455778 | 0.000314014 | 0.002561883 |
| TLK2      | 862.989773  | 0.342982067  | 0.095196053 | 3.602902183  | 0.000314684 | 0.002566224 |
| FAM200B   | 138.7256659 | -0.435849005 | 0.121002283 | -3.601989917 | 0.000315791 | 0.002573425 |
| KIAA0494  | 681.8783453 | -0.271662547 | 0.075421038 | -3.601946563 | 0.000315843 | 0.002573425 |
| NUP50     | 565.2161492 | 0.181201102  | 0.050309879 | 3.601700223  | 0.000316143 | 0.00257474  |
| MKL2      | 288.5387952 | -0.273134252 | 0.075854643 | -3.600758498 | 0.00031729  | 0.002582801 |
| WDR7      | 406.5587316 | -0.190907034 | 0.053020003 | -3.600660557 | 0.00031741  | 0.002582801 |
| PIWIL4    | 12.47060475 | 1.055067847  | 0.293079417 | 3.599938396  | 0.000318293 | 0.002588854 |
| RAPGEFL1  | 173.9754977 | -0.500098018 | 0.139031142 | -3.597021589 | 0.000321882 | 0.002616904 |
| PER2      | 68.53749511 | 0.391223157  | 0.108831242 | 3.594768829  | 0.00032468  | 0.002638501 |
| LOC55310: | 29.65454078 | -0.58036842  | 0.161490737 | -3.59381864  | 0.000325867 | 0.002646992 |
| CCDC149   | 53.19094572 | -0.64050466  | 0.178267781 | -3.592935618 | 0.000326973 | 0.002654825 |
| SIVA1     | 165.65844   | -0.375268168 | 0.104489728 | -3.591435984 | 0.000328861 | 0.002668987 |
| TYROBP    | 42958.59535 | -0.258370658 | 0.071952998 | -3.590825488 | 0.000329632 | 0.002674083 |
| ABRACL    | 986.2827456 | -0.246028862 | 0.06851847  | -3.590694032 | 0.000329799 | 0.002674268 |

|          |             |              |             |              |             |             |
|----------|-------------|--------------|-------------|--------------|-------------|-------------|
| UBE2D2   | 728.9351584 | 0.301767737  | 0.08406684  | 3.589616749  | 0.000331164 | 0.002684175 |
| FAM102B  | 335.8728019 | -0.2345986   | 0.065379352 | -3.588267454 | 0.000332883 | 0.002696929 |
| PRRC2C   | 1493.462576 | 0.305295056  | 0.085105178 | 3.587267719  | 0.000334161 | 0.00270611  |
| HSPB7    | 26.79316617 | 1.330753407  | 0.37106685  | 3.586290195  | 0.000335416 | 0.002715089 |
| EIF2S1   | 392.00864   | 0.241117578  | 0.067273024 | 3.584164416  | 0.000338159 | 0.002736107 |
| AMZ2P1   | 14.56171433 | -1.029756251 | 0.287318226 | -3.584026904 | 0.000338337 | 0.002736361 |
| COX6A1   | 5833.312987 | 0.178533624  | 0.049817753 | 3.583734962  | 0.000338716 | 0.002738234 |
| GGH      | 272.3275099 | 0.347711311  | 0.097148394 | 3.579177123  | 0.000344678 | 0.002785224 |
| SGK223   | 182.5571157 | -0.480182232 | 0.134173807 | -3.578807546 | 0.000345166 | 0.002787956 |
| PRKD3    | 457.3847043 | 0.224754665  | 0.062835539 | 3.576871762  | 0.000347731 | 0.002807458 |
| TMEM159  | 162.5891301 | -0.464792471 | 0.129953584 | -3.576603706 | 0.000348087 | 0.00280912  |
| PSMD14   | 1208.162576 | 0.255342944  | 0.071408369 | 3.575812547  | 0.000349142 | 0.00281641  |
| HCG26    | 44.38404294 | 0.573833032  | 0.160495937 | 3.575374204  | 0.000349727 | 0.002819913 |
| GTF3A    | 2323.323503 | -0.282022795 | 0.07888364  | -3.575174709 | 0.000349994 | 0.002820413 |
| QPRT     | 38.02134687 | -0.600063211 | 0.167845085 | -3.575101476 | 0.000350092 | 0.002820413 |
| RALGAPA2 | 205.3675596 | -0.262088702 | 0.073350485 | -3.573101173 | 0.000352778 | 0.002840826 |
| MAP2K3   | 477.9501075 | 0.684450386  | 0.191571124 | 3.572826479  | 0.000353149 | 0.002842581 |
| RAB18    | 985.8103117 | 0.220311663  | 0.061719816 | 3.569545045  | 0.000357602 | 0.002877181 |
| STK39    | 191.0749663 | -0.697380878 | 0.195381657 | -3.569326258 | 0.0003579   | 0.002878342 |
| COX10    | 442.1880325 | 0.267501149  | 0.074958903 | 3.568637438  | 0.000358843 | 0.002884673 |
| BTN3A2   | 514.8698495 | 0.469491783  | 0.131698665 | 3.564894013  | 0.000364003 | 0.002924897 |
| AAMDC    | 82.99071791 | -0.424832849 | 0.119218283 | -3.563487381 | 0.00036596  | 0.002938811 |
| SLC2A8   | 45.77099838 | -1.355221267 | 0.380314463 | -3.563422899 | 0.00036605  | 0.002938811 |
| CENPV    | 205.2002156 | -0.316183117 | 0.088744103 | -3.562863393 | 0.000366832 | 0.002943816 |
| KLF7     | 132.4657327 | -0.66266711  | 0.186135369 | -3.560135373 | 0.000370664 | 0.002972688 |
| TMEM110  | 357.9996061 | 0.492010421  | 0.138202251 | 3.560075309  | 0.000370748 | 0.002972688 |
| MN1      | 13.1466213  | 3.810022428  | 1.070601986 | 3.55876645   | 0.000372601 | 0.002986254 |
| SEC61A1  | 3919.538702 | 0.359649228  | 0.101150315 | 3.555591788  | 0.000377129 | 0.00302125  |
| BCL2     | 184.5783224 | 0.541811264  | 0.15241437  | 3.554856818  | 0.000378185 | 0.003028405 |
| DCLK2    | 11.13405406 | -0.988069795 | 0.278061424 | -3.553422772 | 0.000380253 | 0.003043656 |
| CCNA1    | 10.10824767 | 1.291793585  | 0.363560355 | 3.553175059  | 0.000380611 | 0.003045216 |
| C3orf18  | 87.62427291 | 0.39526782   | 0.111279529 | 3.55202636   | 0.000382277 | 0.003057228 |
| KBTBD3   | 31.99018981 | -0.592838118 | 0.166910318 | -3.551836242 | 0.000382553 | 0.003058125 |
| LRP3     | 32.87033717 | -0.768171333 | 0.216395982 | -3.549841016 | 0.000385464 | 0.003078754 |
| TTC7A    | 442.7289329 | -0.367610822 | 0.10355439  | -3.549929871 | 0.000385334 | 0.003078754 |
| EIF2AK4  | 579.3916796 | -0.234948131 | 0.066191223 | -3.549536003 | 0.000385911 | 0.003081002 |
| SOAT1    | 11712.10773 | 0.326053352  | 0.091866065 | 3.5492252    | 0.000386366 | 0.00308332  |
| ERLIN2   | 124.5463274 | -0.31017781  | 0.087396412 | -3.549090883 | 0.000386564 | 0.003083573 |
| DEPDC1   | 25.30567024 | 0.888625153  | 0.250405947 | 3.548738211  | 0.000387082 | 0.003085484 |
| DIS3L    | 322.885343  | -0.349627067 | 0.09852251  | -3.54870239  | 0.000387134 | 0.003085484 |
| TPP1     | 11037.29127 | -0.233434446 | 0.065789008 | -3.548228711 | 0.000387831 | 0.003089717 |
| ARRDC4   | 654.6575063 | 0.542322034  | 0.152851934 | 3.54802205   | 0.000388136 | 0.003090821 |
| ACTA2    | 225.7034075 | 0.368774306  | 0.103984316 | 3.54644162   | 0.000390471 | 0.003106764 |
| XIRP1    | 6.337441979 | 1.943906302  | 0.548123131 | 3.546477411  | 0.000390418 | 0.003106764 |
| EBPL     | 70.61066263 | -0.538289681 | 0.151790414 | -3.546269268 | 0.000390727 | 0.00310747  |
| LACC1    | 246.8767658 | -0.769676019 | 0.217048857 | -3.546095698 | 0.000390984 | 0.003108191 |
| GATSL2   | 18.82815504 | -0.701152064 | 0.197746896 | -3.545704529 | 0.000391565 | 0.003111481 |
| KDM3A    | 139.0276055 | -0.342410639 | 0.096577812 | -3.545437948 | 0.000391961 | 0.003113302 |
| USP30    | 276.7990181 | -0.431034152 | 0.121596234 | -3.544798531 | 0.000392913 | 0.003119534 |

|           |             |              |             |              |             |             |
|-----------|-------------|--------------|-------------|--------------|-------------|-------------|
| PAG1      | 714.9718447 | 0.359105506  | 0.101313847 | 3.544485933  | 0.000393379 | 0.003121905 |
| CD247     | 18.85136786 | 0.92004989   | 0.259650133 | 3.543421603  | 0.000394971 | 0.003133199 |
| FKBP14    | 77.00313821 | -0.373213159 | 0.105353048 | -3.542499863 | 0.000396354 | 0.003142831 |
| ARHGAP27  | 196.8938499 | -0.311444462 | 0.087942148 | -3.541469816 | 0.000397904 | 0.003153786 |
| NIPAL1    | 4.234878953 | 1.934154191  | 0.546227526 | 3.540931388  | 0.000398717 | 0.003158885 |
| SH3YL1    | 83.52738341 | -0.544496863 | 0.153830856 | -3.539581565 | 0.000400762 | 0.003173735 |
| SPATA6    | 21.95001978 | -0.715016389 | 0.202032997 | -3.539106977 | 0.000401483 | 0.003178095 |
| FANCC     | 76.36088329 | 0.444103136  | 0.125502671 | 3.538595102  | 0.000402262 | 0.003182912 |
| PHACTR2   | 15.45523713 | 0.845503043  | 0.239119696 | 3.535898786  | 0.00040639  | 0.00321421  |
| SLC12A2   | 86.07612206 | -0.404937766 | 0.114569261 | -3.534436393 | 0.000408646 | 0.003230677 |
| TMPO      | 70.26004009 | 0.60795644   | 0.172075106 | 3.533087702  | 0.000410736 | 0.003245826 |
| CCDC71L   | 192.6107168 | 0.670023358  | 0.189666823 | 3.532633425  | 0.000411443 | 0.00325003  |
| PIR       | 232.5088366 | 0.349753354  | 0.09901227  | 3.532424346  | 0.000411768 | 0.003251223 |
| HIST1H2BE | 91.48457135 | 0.627617101  | 0.177690538 | 3.532079461  | 0.000412305 | 0.003254087 |
| CBWD2     | 266.6391484 | 0.258157852  | 0.073129984 | 3.530123204  | 0.000415366 | 0.003276856 |
| FXR2      | 824.0223866 | 0.19260757   | 0.054571588 | 3.529447754  | 0.000416428 | 0.003283842 |
| TGFBR2    | 262.0076597 | -0.687496402 | 0.194922712 | -3.527020504 | 0.000420264 | 0.003312692 |
| DCSTAMP   | 6344.46666  | 0.40612287   | 0.115187154 | 3.5257653    | 0.000422261 | 0.003327024 |
| LPAR1     | 644.5511867 | 0.400119367  | 0.113513058 | 3.524875232  | 0.000423682 | 0.003336811 |
| PSPC1     | 92.54027625 | 0.468739047  | 0.133104826 | 3.521578143  | 0.000428986 | 0.003377156 |
| ITGA7     | 10.64070528 | 1.219619609  | 0.34646734  | 3.520157511  | 0.000431291 | 0.003393864 |
| LILRA3    | 94.25855599 | 0.970614281  | 0.275830594 | 3.518878266  | 0.000433376 | 0.003407443 |
| LOC37444: | 135.873391  | 0.329037454  | 0.093506453 | 3.518874312  | 0.000433382 | 0.003407443 |
| TMEM189   | 1735.318863 | 0.284480334  | 0.080877407 | 3.517426488  | 0.000435753 | 0.00342464  |
| KCNA3     | 295.5282135 | 0.408487283  | 0.116245568 | 3.514003076  | 0.000441408 | 0.003467619 |
| ZNF124    | 529.702189  | -0.43879772  | 0.124912488 | -3.512841081 | 0.000443343 | 0.003481351 |
| TRIM61    | 31.89907038 | -0.695492235 | 0.198039352 | -3.511889066 | 0.000444934 | 0.003492373 |
| CREB3L2   | 612.3852215 | -0.209780088 | 0.059742712 | -3.511392132 | 0.000445766 | 0.003497436 |
| UBE2O     | 189.8288831 | 0.274524816  | 0.07819896  | 3.510594212  | 0.000447106 | 0.003506473 |
| SNORA70C  | 569.4661735 | 0.600804207  | 0.17129039  | 3.507518481  | 0.000452307 | 0.003545767 |
| RNF166    | 157.6326948 | -0.617926395 | 0.176271156 | -3.505544587 | 0.000455674 | 0.003570661 |
| NECAP1    | 834.0320829 | 0.163704455  | 0.046700354 | 3.505422144  | 0.000455884 | 0.003570802 |
| CLU       | 60.80214161 | 0.56571478   | 0.161420887 | 3.504594677  | 0.000457303 | 0.003580413 |
| FLJ27354  | 32.83986204 | -0.617280307 | 0.176210147 | -3.503091726 | 0.000459891 | 0.003599164 |
| ERMAP     | 97.02093769 | -0.485378189 | 0.138566417 | -3.502855889 | 0.000460298 | 0.00360084  |
| BAZ1A     | 305.496684  | 0.387993148  | 0.110787487 | 3.502138718  | 0.000461539 | 0.003609032 |
| TIMM8A    | 65.67058942 | -0.411874404 | 0.117619515 | -3.501752265 | 0.000462209 | 0.003612754 |
| CXADR     | 143.718531  | -0.508572075 | 0.145268458 | -3.500911914 | 0.000463669 | 0.003622645 |
| GPD1L     | 40.42597442 | -0.463815832 | 0.132511992 | -3.50018005  | 0.000464944 | 0.003631084 |
| FAM216A   | 10.27445871 | -1.091709288 | 0.311962318 | -3.499490883 | 0.000466148 | 0.003638958 |
| ARL6IP4   | 412.9347774 | -0.282010052 | 0.080591694 | -3.499244638 | 0.000466578 | 0.003640796 |
| SUPT5H    | 1330.993639 | 0.329215991  | 0.094086818 | 3.499066044  | 0.000466891 | 0.00364171  |
| CORO1A    | 246.2775063 | -0.70046789  | 0.200236436 | -3.498203939 | 0.000468403 | 0.003651974 |
| TBC1D8    | 447.4684359 | -0.546253922 | 0.156214567 | -3.496818068 | 0.000470843 | 0.003669463 |
| PSEN1     | 2085.911331 | 0.309411764  | 0.088493768 | 3.496424336  | 0.000471538 | 0.003673346 |
| CDK18     | 549.1089327 | 0.27874686   | 0.079734421 | 3.495941375  | 0.000472392 | 0.003678463 |
| SRCRB4D   | 50.19014982 | 0.789294868  | 0.225803867 | 3.495488709  | 0.000473194 | 0.003683169 |
| NBPF1     | 286.1053605 | -0.837530444 | 0.239801204 | -3.492603167 | 0.000478337 | 0.00372164  |
| IPPK      | 102.9461299 | 0.40179665   | 0.115127005 | 3.490029555  | 0.000482967 | 0.003756097 |

|           |             |              |             |              |             |             |
|-----------|-------------|--------------|-------------|--------------|-------------|-------------|
| MYOM1     | 25.29288252 | -1.007913825 | 0.288852295 | -3.489374472 | 0.000484152 | 0.003763745 |
| PCM1      | 340.1613012 | -0.257272196 | 0.073770169 | -3.487482791 | 0.00048759  | 0.00378889  |
| FLJ46906  | 25.0453884  | -0.643648583 | 0.184589664 | -3.486915619 | 0.000488625 | 0.003795117 |
| PSMB3     | 2339.317754 | 0.244135783  | 0.070016731 | 3.486820656  | 0.000488799 | 0.003795117 |
| ZFAND1    | 266.7498923 | -0.2513385   | 0.072092872 | -3.486315535 | 0.000489723 | 0.003800707 |
| COL6A2    | 992.6880093 | 0.631276562  | 0.1811555   | 3.484722042  | 0.000492649 | 0.00382182  |
| RAB21     | 699.2758212 | 0.258957869  | 0.074317529 | 3.484478986  | 0.000493096 | 0.003823701 |
| CLIC4     | 4563.289085 | 0.526447637  | 0.151089397 | 3.48434535   | 0.000493342 | 0.00382402  |
| SZRD1     | 2344.315219 | 0.41122793   | 0.118042513 | 3.483727332  | 0.000494483 | 0.003831266 |
| LTB4R2    | 9.427848384 | -1.251953798 | 0.359555031 | -3.481953224 | 0.000497771 | 0.003854164 |
| TRIM16L   | 22.38777784 | 0.744931758  | 0.213943457 | 3.481909513  | 0.000497852 | 0.003854164 |
| CASP4     | 2333.194955 | 0.246534007  | 0.070832056 | 3.480542855  | 0.000500399 | 0.003872272 |
| RABGAP1L  | 377.8790185 | -0.326555188 | 0.093869112 | -3.478835373 | 0.000503598 | 0.00389541  |
| CCL7      | 148.0370375 | 0.702598754  | 0.202064178 | 3.47710694   | 0.000506856 | 0.003916853 |
| IDH1      | 2015.346094 | -0.222032076 | 0.063856648 | -3.477039324 | 0.000506983 | 0.003916853 |
| RASA3     | 360.8896395 | -0.377522206 | 0.108576048 | -3.477030264 | 0.000507001 | 0.003916853 |
| PLTP      | 1546.396998 | 0.47754712   | 0.137389692 | 3.475858444  | 0.000509221 | 0.003930747 |
| TMEM50B   | 57.58644968 | -0.31508452  | 0.090648883 | -3.475878671 | 0.000509183 | 0.003930747 |
| DNAH17    | 22.99130775 | -1.210792218 | 0.348776962 | -3.471537259 | 0.000517488 | 0.003992904 |
| PIP4K2B   | 648.2746081 | -0.371627806 | 0.107058647 | -3.471254463 | 0.000518033 | 0.003995457 |
| ERN1      | 125.5079259 | 0.408976845  | 0.117932764 | 3.46788145   | 0.000524579 | 0.004040925 |
| RAB35     | 1295.801046 | 0.165998601  | 0.047867337 | 3.467888759  | 0.000524564 | 0.004040925 |
| SLFN12L   | 4.464229014 | 1.756853679  | 0.50657967  | 3.468069848  | 0.000524211 | 0.004040925 |
| JTB       | 1364.975649 | -0.186324629 | 0.053734157 | -3.467526814 | 0.000525271 | 0.004043812 |
| TPPP      | 13.93067397 | -1.470594407 | 0.424111962 | -3.467467413 | 0.000525387 | 0.004043812 |
| TMEM45B   | 23.72994867 | 0.790778016  | 0.228114068 | 3.466590305  | 0.000527105 | 0.004055354 |
| GNAI1     | 19.96209393 | 0.814357632  | 0.234995322 | 3.465420615  | 0.000529403 | 0.004071354 |
| GPRC5B    | 41.4119547  | -1.124988043 | 0.324741249 | -3.464259761 | 0.000531693 | 0.004087279 |
| TDP2      | 3894.491461 | 0.218909112  | 0.063202141 | 3.463634427  | 0.00053293  | 0.004095102 |
| RALGAPB   | 645.9550173 | 0.204678402  | 0.059096887 | 3.463437981  | 0.00053332  | 0.004096404 |
| UQCRC2    | 1190.90835  | -0.243514453 | 0.070316829 | -3.463103435 | 0.000533983 | 0.004099811 |
| COG8      | 218.0745784 | -0.327993066 | 0.094721744 | -3.462700878 | 0.000534783 | 0.004103025 |
| ERAP2     | 496.9066522 | 0.626671416  | 0.180979202 | 3.462670889  | 0.000534842 | 0.004103025 |
| MYO15A    | 29.179132   | 0.74795845   | 0.216052112 | 3.461935374  | 0.000536306 | 0.004112562 |
| NUBPL     | 49.41363017 | -0.789696373 | 0.228124217 | -3.461694608 | 0.000536786 | 0.004114549 |
| LOC10013: | 54.91418113 | -0.548916435 | 0.158665786 | -3.459576571 | 0.000541025 | 0.004144436 |
| NPTXR     | 7.192389782 | -1.154067802 | 0.333591442 | -3.459524608 | 0.00054113  | 0.004144436 |
| DRD5      | 29.51971371 | -0.665389306 | 0.192346836 | -3.459320263 | 0.000541541 | 0.004145878 |
| GAK       | 1130.484033 | 0.213950642  | 0.061856692 | 3.458811585  | 0.000542564 | 0.00415201  |
| SLC25A46  | 668.3133239 | -0.202705713 | 0.058609862 | -3.458559781 | 0.000543072 | 0.004154187 |
| ITPR3     | 50.1269576  | 0.671050515  | 0.194095852 | 3.457315072  | 0.000545587 | 0.00417     |
| PKIA      | 106.600551  | 0.487684399  | 0.141054305 | 3.457422996  | 0.000545368 | 0.00417     |
| LYRM1     | 89.45233204 | 0.43519595   | 0.125964232 | 3.454916852  | 0.000550463 | 0.004205543 |
| PAQR5     | 1073.950507 | 0.338390946  | 0.097962217 | 3.454300604  | 0.000551722 | 0.004213438 |
| RPL36     | 2736.290728 | -0.241665661 | 0.069992894 | -3.452717086 | 0.000554971 | 0.004236511 |
| ZNF780B   | 222.9273113 | -0.344243039 | 0.099717278 | -3.4521905   | 0.000556055 | 0.00424305  |
| ANGEL1    | 754.7347817 | -0.313970912 | 0.091010849 | -3.44981851  | 0.000560964 | 0.004278753 |
| RTN4R     | 140.7482178 | -0.391853489 | 0.11359565  | -3.44954662  | 0.000561529 | 0.004281312 |
| CYGB      | 378.7839614 | -0.496441786 | 0.143933094 | -3.449114957 | 0.000562427 | 0.004286408 |

|          |             |              |             |              |             |             |
|----------|-------------|--------------|-------------|--------------|-------------|-------------|
| GALNT11  | 349.165986  | -0.243419418 | 0.070598171 | -3.447956451 | 0.000564845 | 0.004303076 |
| UBA52    | 3405.994981 | -0.218753847 | 0.063459899 | -3.447119379 | 0.000566598 | 0.004314667 |
| C16orf88 | 69.86235572 | -0.421462567 | 0.12228836  | -3.446465119 | 0.000567972 | 0.004323361 |
| DLGAP4   | 13.97004402 | 0.842519682  | 0.244528607 | 3.445485145  | 0.000570035 | 0.004333822 |
| DUSP22   | 445.9626032 | -0.31463526  | 0.091312406 | -3.445701117 | 0.00056958  | 0.004333822 |
| PROS1    | 350.6517369 | -0.345743138 | 0.10034684  | -3.445481058 | 0.000570044 | 0.004333822 |
| SMAD2    | 927.5262263 | -0.196112571 | 0.056920804 | -3.445358399 | 0.000570303 | 0.004334021 |
| RAB3D    | 22.19029521 | -0.603112413 | 0.175163353 | -3.443142657 | 0.000574996 | 0.004367906 |
| HIP1R    | 4.580865835 | 1.840105647  | 0.534911736 | 3.440017341  | 0.000581677 | 0.004413356 |
| SLC30A7  | 707.0864549 | 0.334796577  | 0.097323859 | 3.440025714  | 0.000581659 | 0.004413356 |
| VAV3     | 92.78539862 | -0.353649718 | 0.102804808 | -3.440011483 | 0.00058169  | 0.004413356 |
| PITPNA   | 942.4409725 | 0.228832619  | 0.06652829  | 3.439628766  | 0.000582513 | 0.004417802 |
| GARNL3   | 5.74140258  | -1.772016639 | 0.515256286 | -3.439097566 | 0.000583657 | 0.004424679 |
| TRAPPC5  | 561.8576174 | -0.272882181 | 0.079367528 | -3.438209386 | 0.000585575 | 0.004437413 |
| RPL7A    | 3130.384577 | -0.303927072 | 0.088399932 | -3.438091709 | 0.000585829 | 0.004437538 |
| LEPRE1   | 211.6517322 | -0.413786611 | 0.120450412 | -3.435327487 | 0.000591838 | 0.004481232 |
| PCGF2    | 7.123664977 | 1.159421004  | 0.33752899  | 3.435026442  | 0.000592496 | 0.004484391 |
| SCRN2    | 25.65090695 | -0.836803992 | 0.243644419 | -3.434529699 | 0.000593583 | 0.004490794 |
| CLEC4D   | 30.97431141 | 1.091071974  | 0.317750613 | 3.433736804  | 0.000595322 | 0.004502122 |
| C3orf52  | 1.414820388 | 2.990080959  | 0.871020723 | 3.432847094  | 0.000597279 | 0.004515089 |
| PITPNC1  | 291.8869029 | -0.273484537 | 0.079675351 | -3.432486126 | 0.000598074 | 0.00451927  |
| PTP4A2   | 1271.02479  | -0.233017488 | 0.067891601 | -3.432199059 | 0.000598708 | 0.004522223 |
| CST2     | 48.62749531 | -1.509324804 | 0.439794415 | -3.431887154 | 0.000599397 | 0.004523865 |
| LIG3     | 121.5838096 | 0.24883225   | 0.072506088 | 3.431880811  | 0.000599411 | 0.004523865 |
| NR4A3    | 343.0124582 | 0.519624435  | 0.151472889 | 3.430478153  | 0.000602518 | 0.004545478 |
| CPPED1   | 270.7792331 | -0.306623759 | 0.089397574 | -3.42988904  | 0.000603828 | 0.004553514 |
| ANKRD33B | 3.367125919 | 2.231601687  | 0.650907299 | 3.428447786  | 0.000607043 | 0.004575908 |
| LY6G5C   | 43.68615596 | -0.571580102 | 0.167009842 | -3.422433648 | 0.000620632 | 0.004676452 |
| ADIPOR2  | 667.7500559 | 0.343059743  | 0.100273768 | 3.421231206  | 0.000623383 | 0.004695279 |
| UQCR11   | 1999.034169 | -0.217116191 | 0.063469935 | -3.420772238 | 0.000624436 | 0.00470131  |
| SHPK     | 231.9487035 | 0.555260318  | 0.162359188 | 3.419950076  | 0.000626326 | 0.004713637 |
| SLC47A1  | 1130.987173 | -0.557181239 | 0.162945264 | -3.419438076 | 0.000627506 | 0.004720609 |
| LAMB1    | 195.9827876 | 0.441600119  | 0.129150539 | 3.419266547  | 0.000627902 | 0.00472168  |
| SART3    | 418.101105  | 0.247579546  | 0.072457776 | 3.416880287  | 0.000633431 | 0.004761339 |
| PSMD12   | 486.8365368 | 0.259401963  | 0.07594065  | 3.415851218  | 0.00063583  | 0.00477744  |
| HERPUD2  | 655.6356549 | 0.233587388  | 0.068396828 | 3.415178651  | 0.000637402 | 0.004787323 |
| GMEB2    | 82.5999584  | 0.326251428  | 0.095564797 | 3.413928974  | 0.000640333 | 0.004807397 |
| MAP4K1   | 84.38696733 | -0.580115898 | 0.169972268 | -3.413003217 | 0.000642512 | 0.004821815 |
| TMEM229I | 114.1772494 | 0.503795286  | 0.147635764 | 3.412420345  | 0.000643887 | 0.004830192 |
| ABHD16A  | 642.6783601 | 0.287001695  | 0.084116032 | 3.41197379   | 0.000644943 | 0.00483422  |
| JOSD1    | 625.4817633 | 0.20568795   | 0.060283323 | 3.412020764  | 0.000644832 | 0.00483422  |
| SWT1     | 21.80482645 | 0.602111749  | 0.176477271 | 3.411837378  | 0.000645266 | 0.004834695 |
| SLC7A6   | 36.46535355 | -0.526894486 | 0.154538173 | -3.409477903 | 0.000650874 | 0.00487475  |
| MYL12B   | 5714.739014 | 0.189607314  | 0.055646271 | 3.40736783   | 0.000655927 | 0.004909808 |
| TGFB1    | 4416.315199 | 0.180236572  | 0.05289713  | 3.407303428  | 0.000656081 | 0.004909808 |
| MED21    | 138.516686  | -0.260437591 | 0.076471063 | -3.405701216 | 0.000659944 | 0.004936728 |
| GDE1     | 875.8124408 | -0.305599965 | 0.089749619 | -3.405027978 | 0.000661573 | 0.004940981 |
| TIMP2    | 8406.170548 | -0.265018913 | 0.077829654 | -3.405114887 | 0.000661362 | 0.004940981 |
| TTC39A   | 4.909149958 | 2.74201322   | 0.805219899 | 3.405297388  | 0.00066092  | 0.004940981 |

|           |             |              |             |              |             |             |
|-----------|-------------|--------------|-------------|--------------|-------------|-------------|
| TXNDC16   | 26.44827289 | -0.730152269 | 0.214424237 | -3.405176016 | 0.000661214 | 0.004940981 |
| CHID1     | 544.0527222 | -0.295118757 | 0.086688227 | -3.404369499 | 0.00066317  | 0.004950924 |
| HPS4      | 278.0632481 | -0.508240534 | 0.149300271 | -3.404150111 | 0.000663703 | 0.004950935 |
| SH3BGRL   | 4042.795272 | -0.299201607 | 0.08789304  | -3.404155856 | 0.000663689 | 0.004950935 |
| MRPL39    | 284.1234563 | 0.195619704  | 0.057470685 | 3.403817197  | 0.000664512 | 0.004953007 |
| MXD1      | 263.1444048 | 0.676207722  | 0.198657748 | 3.403882956  | 0.000664352 | 0.004953007 |
| PTGER3    | 41.24923018 | 0.755355744  | 0.221977395 | 3.402849848  | 0.000666869 | 0.004968589 |
| NPLOC4    | 1129.447544 | 0.340077335  | 0.09996323  | 3.402024282  | 0.000668887 | 0.004979727 |
| SLC20A1   | 1667.063875 | 0.263619689  | 0.077489176 | 3.402019532  | 0.000668899 | 0.004979727 |
| PAPSS1    | 1014.816001 | 0.380552447  | 0.111901444 | 3.400782284  | 0.000671933 | 0.005000321 |
| RAD51B    | 11.16754188 | 0.759665274  | 0.223413892 | 3.400259794  | 0.000673219 | 0.005007886 |
| RHOH      | 30.48780775 | 1.050192901  | 0.308967763 | 3.399037135  | 0.000676235 | 0.00502832  |
| DDIT4L    | 4.91965562  | -1.201807614 | 0.353600794 | -3.398769554 | 0.000676897 | 0.005031234 |
| OLFML2B   | 36.79618775 | -0.728857405 | 0.21450619  | -3.397838566 | 0.000679205 | 0.005046373 |
| USP13     | 249.4557917 | 0.525940854  | 0.154859238 | 3.396251089  | 0.000683157 | 0.005073711 |
| TRIM9     | 8.704329625 | 1.281750219  | 0.37747192  | 3.395617399  | 0.00068474  | 0.005081642 |
| ZNF136    | 125.334512  | -0.222425541 | 0.065503941 | -3.395605456 | 0.00068477  | 0.005081642 |
| CCDC134   | 177.3476995 | 0.308091087  | 0.090826186 | 3.39209537   | 0.000693603 | 0.005145142 |
| PTOV1     | 674.8039155 | -0.263251091 | 0.077614365 | -3.391783096 | 0.000694394 | 0.00514896  |
| SEL1L3    | 370.663341  | -0.483638693 | 0.142622508 | -3.391040439 | 0.000696278 | 0.005160879 |
| CCDC102B  | 23.48728943 | 0.748434458  | 0.220717774 | 3.390911589  | 0.000696606 | 0.005161253 |
| TNFAIP8L2 | 1130.322202 | -0.236767814 | 0.069829744 | -3.390644149 | 0.000697286 | 0.005164238 |
| MTMR11    | 6.331827137 | 1.82263786   | 0.537645908 | 3.390033909  | 0.00069884  | 0.005173691 |
| MEP1A     | 38.97363566 | 0.559656013  | 0.165117843 | 3.38943389   | 0.000700371 | 0.005182967 |
| SH3KBP1   | 72.05719302 | -0.433381211 | 0.127890124 | -3.388699578 | 0.000702249 | 0.005194803 |
| WASH2P    | 12.42937628 | -0.794681772 | 0.234611446 | -3.387225066 | 0.000706034 | 0.005220732 |
| LOC100506 | 27.71354734 | -0.628521585 | 0.185675336 | -3.385056945 | 0.000711635 | 0.005260057 |
| EXOC3L4   | 7.075671904 | 1.487147138  | 0.439398816 | 3.384504199  | 0.000713069 | 0.005266482 |
| GMPR2     | 399.4493567 | -0.373927092 | 0.110479723 | -3.384576658 | 0.000712881 | 0.005266482 |
| ITLN1     | 5.221856207 | -1.853812059 | 0.547975289 | -3.383021274 | 0.000716931 | 0.005292903 |
| MVK       | 96.83510584 | 0.550482848  | 0.162760071 | 3.382173812  | 0.000719146 | 0.005307157 |
| KIF21A    | 12.78385528 | 1.035126764  | 0.306102519 | 3.381634256  | 0.00072056  | 0.005315486 |
| MAN1C1    | 39.80609732 | -0.485168741 | 0.143480373 | -3.381429336 | 0.000721098 | 0.005317347 |
| IQCA1     | 5.428591495 | -1.79822286  | 0.531831307 | -3.381190306 | 0.000721725 | 0.00531987  |
| TAF10     | 865.8213484 | -0.247042993 | 0.073101566 | -3.379448721 | 0.000726314 | 0.005351572 |
| NDOR1     | 100.2841288 | 0.282523747  | 0.083604892 | 3.379272891  | 0.000726778 | 0.00535288  |
| TFPI      | 395.5496155 | 0.404561093  | 0.11973465  | 3.378813842  | 0.000727993 | 0.005359707 |
| MGMT      | 147.7627338 | -0.349061157 | 0.10331366  | -3.378654448 | 0.000728415 | 0.005360697 |
| KHK       | 30.73282545 | -0.527834113 | 0.156344243 | -3.376102002 | 0.000735207 | 0.005408543 |
| MAD1L1    | 254.1299494 | -0.285744849 | 0.084644369 | -3.375828228 | 0.000735939 | 0.005411791 |
| RECK      | 39.20314606 | -0.589918712 | 0.174935065 | -3.372215358 | 0.000745661 | 0.005481124 |
| NOP9      | 127.8886398 | -0.23569585  | 0.069900533 | -3.371874841 | 0.000746584 | 0.005485741 |
| AOC3      | 699.1253999 | -0.491465036 | 0.145812379 | -3.370530264 | 0.000750237 | 0.00551041  |
| SAP130    | 576.4651571 | 0.237529814  | 0.070479195 | 3.370211802  | 0.000751104 | 0.005514609 |
| GRK5      | 52.11295145 | 0.730744916  | 0.216850637 | 3.369807552  | 0.000752207 | 0.005518315 |
| RNASE1    | 12.66430829 | -1.591343644 | 0.472247946 | -3.369720628 | 0.000752444 | 0.005518315 |
| SLC25A39  | 638.1474312 | -0.223073976 | 0.066199929 | -3.369701149 | 0.000752497 | 0.005518315 |
| C6orf48   | 312.5770723 | -0.390827581 | 0.116066458 | -3.367274131 | 0.000759152 | 0.005564923 |
| STOX2     | 24.16433852 | -0.766406288 | 0.227659611 | -3.366456984 | 0.000761405 | 0.005579242 |

|           |             |              |             |              |             |             |
|-----------|-------------|--------------|-------------|--------------|-------------|-------------|
| IFT27     | 22.24250496 | -0.650000145 | 0.193096431 | -3.366194498 | 0.00076213  | 0.005582359 |
| CBR3      | 11.95223617 | 0.771561824  | 0.229256634 | 3.365493991  | 0.000764067 | 0.005594354 |
| ZFP161    | 174.1649058 | -0.348311548 | 0.103515202 | -3.364834737 | 0.000765895 | 0.005605535 |
| APH1B     | 386.5491599 | -0.232299719 | 0.069057042 | -3.363881693 | 0.000768545 | 0.005622718 |
| PAQR7     | 13.58062569 | -0.937284544 | 0.278652216 | -3.363635715 | 0.00076923  | 0.005625523 |
| KCNAB2    | 2779.114921 | -0.445834433 | 0.132621249 | -3.361711904 | 0.000774609 | 0.005662638 |
| FLJ39639  | 8.069346351 | -1.33278259  | 0.396516028 | -3.361232572 | 0.000775955 | 0.00567025  |
| TCHP      | 288.8193298 | -0.3197016   | 0.095122717 | -3.360938468 | 0.000776781 | 0.005674066 |
| ANKRD29   | 180.9631494 | 0.354455316  | 0.105483573 | 3.360289253  | 0.000778609 | 0.005685189 |
| PTH2R     | 21.60690467 | -0.633448247 | 0.188626761 | -3.358209846 | 0.00078449  | 0.005725888 |
| PWP2      | 174.6142214 | -0.243750863 | 0.07261245  | -3.356874226 | 0.00078829  | 0.005751366 |
| KIAA0664  | 575.0435913 | 0.245103678  | 0.073024713 | 3.356448354  | 0.000789505 | 0.005757976 |
| ATP1B4    | 11.8512781  | 1.317840194  | 0.392693128 | 3.355903372  | 0.000791062 | 0.005767077 |
| SLC36A1   | 229.6284235 | -0.782706469 | 0.233314788 | -3.354722927 | 0.000794445 | 0.005789476 |
| CDR2L     | 9.985704433 | -0.833849955 | 0.248597488 | -3.35421714  | 0.000795899 | 0.005795537 |
| RPS11     | 12571.30796 | -0.324701862 | 0.096802829 | -3.354260037 | 0.000795775 | 0.005795537 |
| SNX24     | 157.3151666 | -0.385758951 | 0.115013601 | -3.354028966 | 0.00079644  | 0.005797214 |
| ASB8      | 217.7822642 | -0.250730417 | 0.074781516 | -3.352839443 | 0.000799871 | 0.005819912 |
| POP5      | 192.3327021 | -0.298352347 | 0.089018452 | -3.351578689 | 0.000803522 | 0.005844196 |
| C1orf233  | 94.83085566 | -0.413295352 | 0.123324673 | -3.351278728 | 0.000804393 | 0.005848247 |
| SLC5A3    | 2294.490225 | 0.457826733  | 0.136627384 | 3.350914876  | 0.000805451 | 0.005853653 |
| ERMP1     | 619.8032826 | -0.281083486 | 0.083930118 | -3.349018127 | 0.000810985 | 0.005888036 |
| HAAO      | 173.5182693 | 0.605112227  | 0.18068614  | 3.348968704  | 0.00081113  | 0.005888036 |
| HIST1H4C  | 766.4415189 | -0.319263298 | 0.0953315   | -3.348980126 | 0.000811096 | 0.005888036 |
| PLEKHA4   | 25.63891252 | 0.880700496  | 0.26308694  | 3.347564483  | 0.00081525  | 0.005915643 |
| NSUN2     | 780.2959714 | 0.186764762  | 0.055816951 | 3.346022314  | 0.000819798 | 0.005946328 |
| AKR1C3    | 1082.899054 | -0.324229452 | 0.096959126 | -3.343980758 | 0.000825855 | 0.005987928 |
| CNBP      | 3453.931724 | 0.217553886  | 0.065124249 | 3.34059724   | 0.000835984 | 0.006059014 |
| INSR      | 157.4711998 | -0.24838021  | 0.074368676 | -3.339849821 | 0.000838237 | 0.006072982 |
| LOC100240 | 28.77811509 | -0.634012341 | 0.189843057 | -3.339665666 | 0.000838793 | 0.006074648 |
| SORT1     | 3797.628156 | 0.265518403  | 0.07951155  | 3.339368974  | 0.00083969  | 0.006078778 |
| IGIP      | 107.0116645 | -0.338839822 | 0.101498765 | -3.338363984 | 0.000842733 | 0.00609844  |
| DDA1      | 1121.019479 | 0.216567092  | 0.064883727 | 3.337772071  | 0.00084453  | 0.006109073 |
| FERMT2    | 15.40245642 | 1.034946961  | 0.310166671 | 3.336744584  | 0.000847658 | 0.006129321 |
| SUMO3     | 1290.760168 | -0.254053504 | 0.076147842 | -3.336319162 | 0.000848956 | 0.006136328 |
| IL17RB    | 488.5284427 | 0.566378763  | 0.16994222  | 3.33277254   | 0.000859852 | 0.006212673 |
| CBY1      | 42.07489758 | -0.475700046 | 0.142801269 | -3.331203216 | 0.000864715 | 0.006245384 |
| SERPINB9  | 112.1044773 | 0.849876747  | 0.255143815 | 3.330971391  | 0.000865435 | 0.006248165 |
| BAD       | 348.8088564 | -0.308470483 | 0.092618754 | -3.3305402   | 0.000866776 | 0.006255427 |
| RHBDF1    | 16.2933076  | 0.681199693  | 0.204598291 | 3.329449581  | 0.000870178 | 0.006277546 |
| SLA2      | 12.62808065 | 1.246183224  | 0.374343514 | 3.328983077  | 0.000871637 | 0.006285636 |
| PRAM1     | 517.0430213 | -0.351556945 | 0.105641428 | -3.327832199 | 0.000875246 | 0.006309218 |
| B9D1      | 31.89766331 | -0.544962463 | 0.163764349 | -3.327723438 | 0.000875587 | 0.006309241 |
| NAA35     | 172.5459236 | 0.226613722  | 0.068115244 | 3.326916387  | 0.000878127 | 0.006325095 |
| RAP2A     | 1901.290525 | 0.256506382  | 0.077120304 | 3.32605512   | 0.000880845 | 0.006342221 |
| PTPLAD2   | 489.2289183 | -0.347623059 | 0.104521263 | -3.325859736 | 0.000881463 | 0.006344217 |
| MID2      | 50.28895342 | 0.70587219   | 0.212330907 | 3.32439682   | 0.0008861   | 0.006375131 |
| HSF4      | 7.648219046 | -1.164270453 | 0.350267727 | -3.323944406 | 0.000887539 | 0.006383018 |
| TMEM99    | 34.90659919 | -0.549548436 | 0.165351221 | -3.323522102 | 0.000888884 | 0.006390224 |

|           |             |              |             |              |             |             |
|-----------|-------------|--------------|-------------|--------------|-------------|-------------|
| ITFG2     | 362.6654461 | -0.258748053 | 0.077873042 | -3.322690976 | 0.000891536 | 0.006406821 |
| FAM117A   | 181.4264386 | -0.359758604 | 0.108291739 | -3.322124183 | 0.000893349 | 0.006417375 |
| FCGR2C    | 28.40177336 | -0.661934198 | 0.199315294 | -3.321040676 | 0.000896825 | 0.006439858 |
| RWDD2A    | 109.0958524 | 0.322009072  | 0.097018718 | 3.319040679  | 0.000903273 | 0.006483661 |
| ALDH18A1  | 135.7581901 | -0.39582838  | 0.119268695 | -3.318795255 | 0.000904067 | 0.006486863 |
| MAP3K12   | 93.17992817 | -0.441950217 | 0.133215781 | -3.317551521 | 0.000908102 | 0.006513305 |
| GOLT1B    | 641.2202487 | 0.218639125  | 0.065916647 | 3.316903023  | 0.000910212 | 0.00652593  |
| PCYOX1L   | 119.3065929 | -0.443711601 | 0.133789956 | -3.316479168 | 0.000911594 | 0.006533323 |
| UGGT1     | 449.7236355 | -0.226686684 | 0.068361974 | -3.315976272 | 0.000913236 | 0.006542575 |
| ASRGL1    | 47.12473201 | -1.132206887 | 0.341702491 | -3.313428835 | 0.000921596 | 0.006599759 |
| ZNF737    | 159.6992173 | -0.399148354 | 0.120467484 | -3.313328536 | 0.000921926 | 0.006599759 |
| PSMA4     | 1201.854181 | 0.403993049  | 0.121966585 | 3.31232566   | 0.000925238 | 0.006620922 |
| LMLN      | 161.2372295 | 0.296500728  | 0.089522046 | 3.312041449  | 0.000926178 | 0.006625107 |
| PHF6      | 268.8802681 | -0.190813327 | 0.057620663 | -3.311543427 | 0.000927828 | 0.006634365 |
| NCDN      | 86.2547939  | 0.290554634  | 0.087756319 | 3.310925503  | 0.00092988  | 0.006646481 |
| RNF6      | 842.7406519 | 0.214673423  | 0.064840839 | 3.310774904  | 0.00093038  | 0.006647509 |
| PRKAG2-A' | 24.35700197 | -0.604114401 | 0.182530627 | -3.309660478 | 0.000934092 | 0.006671472 |
| CIR1      | 1076.628752 | 0.204616135  | 0.06186296  | 3.307571034  | 0.000941088 | 0.006718866 |
| RPL6      | 3121.53918  | -0.514589044 | 0.155642406 | -3.306226492 | 0.000945616 | 0.006748607 |
| LBR       | 590.9665384 | -0.194596282 | 0.058876616 | -3.305153983 | 0.000949242 | 0.006771892 |
| ALDH1A1   | 2277.313003 | -0.58254786  | 0.176475534 | -3.301012024 | 0.000963368 | 0.006870031 |
| LOC10050! | 44.12421207 | -0.414005214 | 0.125446113 | -3.300263386 | 0.000965941 | 0.00688348  |
| TCEAL1    | 23.82952853 | -0.61584094  | 0.18660441  | -3.300248588 | 0.000965992 | 0.00688348  |
| DIEXF     | 421.7666201 | 0.24783164   | 0.075116757 | 3.299285658  | 0.000969312 | 0.006901858 |
| HSD17B12  | 1224.696961 | 0.331466948  | 0.100464226 | 3.29935304   | 0.00096908  | 0.006901858 |
| HIST2H2AE | 131.4179754 | -0.383898097 | 0.116370879 | -3.298918946 | 0.000970579 | 0.006908241 |
| FAM40A    | 341.8782012 | 0.247826239  | 0.075131657 | 3.298559456  | 0.000971823 | 0.006914452 |
| C5orf42   | 95.33937789 | -0.390931492 | 0.118521915 | -3.298389937 | 0.00097241  | 0.006915987 |
| TOM1L2    | 374.5683594 | -0.28309651  | 0.085832788 | -3.298232716 | 0.000972955 | 0.006917221 |
| LIMK2     | 260.2508871 | 0.619796487  | 0.187936656 | 3.297901012  | 0.000974105 | 0.006922756 |
| KLF13     | 1243.734597 | -0.222729167 | 0.067550897 | -3.297205169 | 0.000976521 | 0.006937285 |
| CORO6     | 16.55866928 | -0.81926873  | 0.248611961 | -3.29537134  | 0.000982917 | 0.006980059 |
| ARL2BP    | 1019.929337 | 0.341305337  | 0.103613381 | 3.294027598  | 0.000987628 | 0.007010842 |
| LOC10028' | 25.7685382  | -0.613436842 | 0.186238685 | -3.293820731 | 0.000988355 | 0.007013332 |
| PLAGL2    | 141.3247279 | 0.405126309  | 0.123117039 | 3.290578711  | 0.000999815 | 0.007091952 |
| TDRD9     | 333.7820934 | -0.395136092 | 0.12011133  | -3.289748696 | 0.001002769 | 0.007110197 |
| RPS9      | 2592.569742 | -0.433230699 | 0.131745004 | -3.288403245 | 0.001007574 | 0.00714155  |
| MCOLN3    | 83.43392752 | 0.421388344  | 0.128178488 | 3.287512201  | 0.001010768 | 0.007159388 |
| TPM2      | 45.54669075 | -0.451231653 | 0.137257326 | -3.287486843 | 0.001010859 | 0.007159388 |
| ZNF781    | 2.117693343 | -2.352384293 | 0.715636681 | -3.287120905 | 0.001012174 | 0.007165974 |
| L3HYPDH   | 49.95095428 | -0.382614069 | 0.116438656 | -3.285971193 | 0.001016314 | 0.007189824 |
| SAP30BP   | 1155.894819 | 0.246583075  | 0.075041088 | 3.285974131  | 0.001016303 | 0.007189824 |
| GPBAR1    | 102.3712665 | 0.669597766  | 0.20385574  | 3.284664767  | 0.001021038 | 0.0072205   |
| CKS1B     | 183.9381312 | 0.403764379  | 0.122942421 | 3.284174631  | 0.001022815 | 0.007230326 |
| DNAJC7    | 1006.174912 | 0.34631307   | 0.105459397 | 3.283852173  | 0.001023986 | 0.007235858 |
| CLDN23    | 343.4675206 | 0.576014488  | 0.175433619 | 3.283375733  | 0.001025719 | 0.00724453  |
| PIP5K1A   | 175.0472476 | 0.295391216  | 0.089967757 | 3.283300883  | 0.001025991 | 0.00724453  |
| HSPA6     | 154.3946189 | 0.500324945  | 0.152441534 | 3.282077614  | 0.001030452 | 0.007273276 |
| TLE2      | 37.59677439 | -0.641305313 | 0.195462581 | -3.280962057 | 0.001034537 | 0.007299339 |

|           |             |              |             |              |             |             |
|-----------|-------------|--------------|-------------|--------------|-------------|-------------|
| PER1      | 232.0439054 | 0.250410851  | 0.076325131 | 3.280844023  | 0.00103497  | 0.007299631 |
| ZNF554    | 7.164458202 | -0.841816866 | 0.256595976 | -3.28070954  | 0.001035463 | 0.007300348 |
| PLEKHA7   | 22.91264895 | 0.841320777  | 0.256486512 | 3.280175523  | 0.001037425 | 0.007311415 |
| SRSF12    | 5.365880397 | 1.966849095  | 0.599690348 | 3.279774474  | 0.001038901 | 0.007319048 |
| RPS24     | 3.804867421 | -1.728351272 | 0.527310686 | -3.277671625 | 0.001046671 | 0.007370999 |
| CD300LB   | 768.5989855 | -0.404909713 | 0.123706679 | -3.273143516 | 0.001063585 | 0.007487282 |
| SMAD6     | 124.7044496 | -0.324479798 | 0.099156954 | -3.272385703 | 0.00106644  | 0.007504547 |
| NRP2      | 3996.229055 | 0.466717459  | 0.142673338 | 3.271231086  | 0.001070804 | 0.007532411 |
| MRPL48    | 81.87226942 | -0.444060616 | 0.13576148  | -3.270888145 | 0.001072103 | 0.007538705 |
| FSTL1     | 5.607052498 | 1.351066053  | 0.413086491 | 3.270661433  | 0.001072963 | 0.007541905 |
| ATP8B3    | 19.99493888 | -0.700972697 | 0.214375511 | -3.269835697 | 0.0010761   | 0.007561102 |
| VCP       | 8265.111184 | 0.360548926  | 0.110375275 | 3.266573306  | 0.001088576 | 0.007645883 |
| PAAF1     | 78.70212165 | -0.425134888 | 0.130168056 | -3.266046225 | 0.001090604 | 0.007654359 |
| ZC2HC1A   | 113.6880789 | -0.358947734 | 0.109900361 | -3.266119686 | 0.001090322 | 0.007654359 |
| LSM14B    | 260.044225  | -0.309864854 | 0.094929159 | -3.264169388 | 0.001097855 | 0.007702346 |
| IFITM2    | 273.1315257 | 0.821930064  | 0.251829276 | 3.263838413  | 0.001099138 | 0.007708447 |
| CCDC107   | 226.0709766 | -0.234066223 | 0.071763137 | -3.261649817 | 0.001107659 | 0.00776528  |
| ADAP1     | 377.2957369 | -0.372119039 | 0.114136415 | -3.260300755 | 0.001112941 | 0.007796447 |
| PDE4DIP   | 1712.922134 | 0.261569882  | 0.080226876 | 3.260377268  | 0.001112641 | 0.007796447 |
| KBTBD2    | 327.464403  | 0.272024025  | 0.083443417 | 3.259981838  | 0.001114193 | 0.007802285 |
| PSMC4     | 1414.810553 | 0.32121022   | 0.098581156 | 3.258332874  | 0.001120689 | 0.007844821 |
| SNX30     | 702.8060161 | -0.315040714 | 0.096729437 | -3.256926996 | 0.001126254 | 0.007880817 |
| ATP8B4    | 14.1955159  | -0.995114779 | 0.305680625 | -3.255406783 | 0.001132301 | 0.007920154 |
| TES       | 359.0530542 | 0.284448392  | 0.087386796 | 3.255050035  | 0.001133724 | 0.007927134 |
| MTRNR2L8  | 23.43475694 | 0.855158112  | 0.262732704 | 3.254859778  | 0.001134484 | 0.00792947  |
| ZDHHC9    | 121.6624531 | 0.447554588  | 0.137517526 | 3.254527641  | 0.001135811 | 0.007935772 |
| MED22     | 228.5399885 | -0.224996499 | 0.069148722 | -3.253805623 | 0.001138702 | 0.007952986 |
| PBX3      | 772.7011653 | -0.303719283 | 0.093369321 | -3.252880916 | 0.001142414 | 0.007975922 |
| EZR       | 1470.072007 | 0.281477472  | 0.086538094 | 3.252642364  | 0.001143373 | 0.00797963  |
| ANXA7     | 2617.685109 | 0.229881702  | 0.070695226 | 3.251728793  | 0.001147054 | 0.00800135  |
| GPR124    | 20.78044252 | -1.014631315 | 0.312035161 | -3.251656999 | 0.001147344 | 0.00800135  |
| TMEM14B   | 236.4753212 | -0.202280409 | 0.062280004 | -3.247919041 | 0.001162523 | 0.008104176 |
| ZNF688    | 122.8977714 | 0.361326627  | 0.111264074 | 3.247468972  | 0.001164364 | 0.008113968 |
| SH2B1     | 232.2450379 | -0.400290074 | 0.123274115 | -3.247154312 | 0.001165652 | 0.008119908 |
| SEPW1     | 99.09547048 | -0.478644228 | 0.147410248 | -3.247021378 | 0.001166196 | 0.008120666 |
| SLC7A6OS  | 373.499636  | -0.189627276 | 0.058442423 | -3.244685368 | 0.001175805 | 0.008184514 |
| NPRL3     | 260.2782487 | -0.309154224 | 0.095290961 | -3.244318448 | 0.00117732  | 0.008192005 |
| ZNF271    | 245.3110344 | -0.273816348 | 0.084406965 | -3.244001839 | 0.00117863  | 0.008198055 |
| VASP      | 452.4573638 | 0.484033754  | 0.14924356  | 3.243247184  | 0.001181756 | 0.008216734 |
| WBP4      | 184.0577659 | 0.406888069  | 0.125475348 | 3.242772973  | 0.001183725 | 0.008227352 |
| CAMTA1    | 135.0669154 | 0.47218424   | 0.145637535 | 3.242187796  | 0.001186158 | 0.008238828 |
| MACF1     | 967.7865171 | 0.219985393  | 0.067853453 | 3.242066285  | 0.001186664 | 0.008238828 |
| TNFSF8    | 15.62250505 | -0.966031528 | 0.297968697 | -3.24205709  | 0.001186702 | 0.008238828 |
| LINC00113 | 3.950742348 | 2.86569419   | 0.884476884 | 3.239987662  | 0.001195349 | 0.008295765 |
| DHCR24    | 856.9393008 | 0.408687701  | 0.126174488 | 3.23906765   | 0.001199211 | 0.008317359 |
| PNPLA7    | 21.16568238 | -0.841204892 | 0.259714683 | -3.238957774 | 0.001199673 | 0.008317359 |
| SELK      | 480.0399971 | 0.274237878  | 0.084669339 | 3.238927827  | 0.001199799 | 0.008317359 |
| CD79A     | 33.6032393  | 0.714217764  | 0.220532156 | 3.238610533  | 0.001201135 | 0.008319733 |
| CRAM      | 7.145987288 | 1.965716518  | 0.606960212 | 3.238625003  | 0.001201074 | 0.008319733 |

|           |             |              |             |              |             |             |
|-----------|-------------|--------------|-------------|--------------|-------------|-------------|
| PDCD1     | 6.492619924 | 1.129065456  | 0.34863536  | 3.238528236  | 0.001201481 | 0.008319733 |
| CCDC9     | 218.6284342 | 0.352333746  | 0.108798015 | 3.238420713  | 0.001201934 | 0.008319778 |
| SLC35B4   | 270.3409587 | -0.244551404 | 0.075525915 | -3.237980042 | 0.001203792 | 0.008329545 |
| ESR1      | 34.35749764 | 0.558708896  | 0.172559204 | 3.237780914  | 0.001204633 | 0.008331718 |
| NUP153    | 762.0925477 | 0.218486132  | 0.067482024 | 3.237693813  | 0.001205001 | 0.008331718 |
| GNB5      | 56.01376054 | -0.450473292 | 0.139172642 | -3.236794867 | 0.001208803 | 0.008354907 |
| ZFP14     | 58.42016355 | -0.469101826 | 0.144998439 | -3.235219838 | 0.001215491 | 0.00839802  |
| CCDC103   | 26.75371716 | 0.508909236  | 0.157312452 | 3.235021953  | 0.001216334 | 0.008400728 |
| RDH10     | 353.0841466 | -0.518591048 | 0.160329868 | -3.234525516 | 0.00121845  | 0.008412228 |
| NEFM      | 4.539560182 | 1.472168972  | 0.455190365 | 3.234183069  | 0.001219912 | 0.008419202 |
| ATL3      | 877.7164038 | -0.165711456 | 0.051244141 | -3.233763944 | 0.001221704 | 0.008428445 |
| VNN1      | 356.1785419 | 0.370875185  | 0.114695369 | 3.233567224  | 0.001222546 | 0.008431131 |
| BTAF1     | 473.200981  | 0.214503513  | 0.066352755 | 3.232774767  | 0.001225942 | 0.008451424 |
| KAT2A     | 19.66597935 | -0.727853517 | 0.225220775 | -3.231733465 | 0.001230418 | 0.008479143 |
| LIN7A     | 7.055541265 | -1.246571482 | 0.385742857 | -3.231612609 | 0.001230938 | 0.008479594 |
| GEMIN6    | 76.09474563 | -0.387638959 | 0.11996876  | -3.231165838 | 0.001232864 | 0.008489721 |
| GPR137B   | 3937.704728 | -0.19717295  | 0.061028006 | -3.230860087 | 0.001234183 | 0.008495668 |
| ARID3A    | 386.4826246 | 0.312716489  | 0.096827328 | 3.229630487  | 0.001239503 | 0.008525987 |
| MAPK6     | 643.6828325 | 0.296334108  | 0.091754731 | 3.229633016  | 0.001239492 | 0.008525987 |
| PUM2      | 947.900063  | -0.178250575 | 0.055215516 | -3.228269662 | 0.001245415 | 0.008563493 |
| ZNF544    | 155.1719229 | -0.319266675 | 0.098916504 | -3.227638822 | 0.001248165 | 0.008579233 |
| REEP4     | 90.46206385 | -0.507677112 | 0.157305907 | -3.227323886 | 0.001249539 | 0.008585515 |
| FBXW8     | 56.97259394 | -0.533342699 | 0.165325274 | -3.226020349 | 0.001255244 | 0.008618358 |
| KIF5B     | 3064.491474 | 0.298104114  | 0.092404285 | 3.226085401  | 0.001254959 | 0.008618358 |
| MAN2A2    | 727.1425473 | -0.35384441  | 0.109697269 | -3.22564465  | 0.001256893 | 0.008626499 |
| ENC1      | 80.48807789 | -0.44107739  | 0.136763175 | -3.225118091 | 0.001259207 | 0.0086392   |
| #N/A      | 76.32255067 | -0.458233935 | 0.142119927 | -3.224276469 | 0.001262914 | 0.008661443 |
| DGKD      | 83.14201859 | -0.327621686 | 0.101620776 | -3.223963619 | 0.001264295 | 0.008667721 |
| CCDC91    | 654.8764782 | -0.176201476 | 0.054687594 | -3.221964326 | 0.00127315  | 0.00872522  |
| ZNF625    | 109.288579  | -0.667614416 | 0.20725208  | -3.221267622 | 0.001276249 | 0.008743245 |
| EIF5      | 831.7814777 | 0.268129655  | 0.083274902 | 3.219813527  | 0.00128274  | 0.008784483 |
| TREML1    | 6.933048138 | -1.342957723 | 0.41715339  | -3.219337909 | 0.00128487  | 0.008795835 |
| LHFPL2    | 80.30914587 | 0.475353293  | 0.147673873 | 3.21893971   | 0.001286655 | 0.008804824 |
| ZNF618    | 52.5200869  | 0.501964869  | 0.156043093 | 3.216834922  | 0.001296132 | 0.008866415 |
| MTSS1     | 37.29026448 | 0.592363785  | 0.184198124 | 3.215905628  | 0.001300336 | 0.008891911 |
| ABHD14A   | 37.27974726 | -0.565713771 | 0.175923194 | -3.215686105 | 0.001301331 | 0.008895451 |
| ATOX1     | 4638.584726 | 0.288555246  | 0.089738413 | 3.215515378  | 0.001302105 | 0.00889748  |
| DNAJB6    | 2306.44985  | 0.299201835  | 0.093052687 | 3.215402408  | 0.001302618 | 0.00889772  |
| HDAC7     | 222.5462751 | 0.315049428  | 0.098045377 | 3.213302237  | 0.001312181 | 0.008949922 |
| MDM4      | 274.4888686 | 0.318410591  | 0.099088364 | 3.213400433  | 0.001311733 | 0.008949922 |
| RAB39A    | 96.64753887 | 0.370997874  | 0.11545573  | 3.213334441  | 0.001312034 | 0.008949922 |
| WAS       | 1722.833319 | -0.380738988 | 0.11847981  | -3.213534769 | 0.001311119 | 0.008949922 |
| CLIC2     | 592.6634471 | 0.257141499  | 0.080067271 | 3.211568158  | 0.001320127 | 0.009000819 |
| LINC00094 | 35.96817633 | -0.471570537 | 0.146845857 | -3.211330202 | 0.00132122  | 0.009004981 |
| PSMC6     | 1342.308417 | 0.200667989  | 0.062500028 | 3.210686369  | 0.001324184 | 0.009021879 |
| LMO4      | 740.918401  | 0.94288251   | 0.294086821 | 3.206136567  | 0.001345301 | 0.009162406 |
| PPP1R12A  | 107.8637078 | 0.284363542  | 0.088745312 | 3.20426549   | 0.001354076 | 0.009218795 |
| EPHX2     | 2.812977133 | -1.98894224  | 0.620875321 | -3.203448701 | 0.001357922 | 0.009237176 |
| RPL13AP6  | 48.36020303 | 0.452606054  | 0.141290305 | 3.203376587  | 0.001358262 | 0.009237176 |

|          |             |              |             |              |             |             |
|----------|-------------|--------------|-------------|--------------|-------------|-------------|
| WTAP     | 215.679645  | 0.535714435  | 0.167233457 | 3.203392702  | 0.001358186 | 0.009237176 |
| FANCE    | 60.2196125  | 0.707729417  | 0.2211065   | 3.200853058  | 0.001370214 | 0.009315055 |
| ZMIZ2    | 1087.652478 | 0.277348695  | 0.086659314 | 3.20044877   | 0.001372138 | 0.009324731 |
| LCLAT1   | 122.9270891 | -0.208858471 | 0.065266036 | -3.200109617 | 0.001373753 | 0.009332307 |
| BCAS3    | 131.9673847 | -0.337727279 | 0.105572188 | -3.199017526 | 0.001378968 | 0.009364317 |
| SNX9     | 78.76751558 | 0.327462412  | 0.102382717 | 3.198414957  | 0.001381853 | 0.00938049  |
| ALG1     | 170.7203546 | -0.276239282 | 0.086410234 | -3.196835227 | 0.001389443 | 0.009425146 |
| STAC     | 446.8428201 | 0.552672171  | 0.172878895 | 3.196874733  | 0.001389252 | 0.009425146 |
| SLC25A40 | 377.5721491 | 0.302218592  | 0.094564531 | 3.195897951  | 0.001393964 | 0.009452375 |
| CSRNP2   | 49.71405976 | 0.491600557  | 0.15385489  | 3.195222186  | 0.001397232 | 0.009467646 |
| FAIM2    | 42.28703457 | 0.955643495  | 0.299079264 | 3.195285029  | 0.001396928 | 0.009467646 |
| NFATC1   | 62.60688448 | -0.425367439 | 0.133156785 | -3.194485664 | 0.001400802 | 0.009488387 |
| EIF4A2   | 4489.102569 | -0.207163857 | 0.064945895 | -3.189791387 | 0.001423755 | 0.009638278 |
| SIGLEC7  | 132.7298992 | -0.470719659 | 0.147572649 | -3.189748645 | 0.001423966 | 0.009638278 |
| TIMM13   | 230.2929476 | -0.228247221 | 0.0715784   | -3.188772327 | 0.001428784 | 0.009667376 |
| SNRNP25  | 69.37822053 | -0.511054566 | 0.16031093  | -3.187895966 | 0.001433121 | 0.009693203 |
| EEF1A1   | 51947.92577 | -0.307389204 | 0.09649377  | -3.185586012 | 0.001444612 | 0.009767377 |
| XXYL1    | 9.127383927 | -0.814300019 | 0.255658472 | -3.185108681 | 0.001446997 | 0.009779954 |
| PRX      | 4.512595489 | -1.264996606 | 0.397312489 | -3.183883318 | 0.001453136 | 0.009817887 |
| CIB1     | 911.9659935 | -0.178619085 | 0.056104438 | -3.18368907  | 0.001454111 | 0.009820916 |
| P2RY6    | 17.2186804  | -0.901337138 | 0.283234443 | -3.182300602 | 0.001461101 | 0.009864548 |
| EPOR     | 24.46076992 | -0.741721654 | 0.233140671 | -3.181433982 | 0.001465479 | 0.009890525 |
| LSM7     | 658.4788297 | -0.175200855 | 0.055099505 | -3.179717425 | 0.001474187 | 0.009945694 |
| GRB10    | 80.58685682 | -0.656462495 | 0.20650457  | -3.178924778 | 0.001478224 | 0.009969321 |
| MAN1A2   | 184.194824  | -0.27624616  | 0.086913898 | -3.178388804 | 0.00148096  | 0.009984157 |
| ZMYND10  | 6.985845561 | -1.179192992 | 0.37109303  | -3.177620965 | 0.001484887 | 0.010007013 |
| HDAC9    | 15.16059988 | 0.582584402  | 0.183455608 | 3.175615117  | 0.001495192 | 0.010072814 |
| DECR2    | 121.8662589 | -0.351989483 | 0.110917127 | -3.173445735 | 0.001506411 | 0.010144725 |
| SLC35B2  | 60.40551762 | -0.607224394 | 0.1913555   | -3.173279021 | 0.001507276 | 0.010146886 |
| PDIA3P   | 5828.311314 | 0.187401243  | 0.059060483 | 3.173039483  | 0.00150852  | 0.010151594 |
| PFAS     | 59.10506425 | -0.453357117 | 0.142895147 | -3.172655802 | 0.001510515 | 0.010161348 |
| MCMBP    | 715.0468692 | 0.245790506  | 0.077485846 | 3.172069732  | 0.001513567 | 0.010178203 |
| KIAA1429 | 236.9831206 | -0.239237373 | 0.07542409  | -3.171896043 | 0.001514472 | 0.010180618 |
| PEX13    | 524.3931271 | 0.205555595  | 0.064821953 | 3.171079948  | 0.001518733 | 0.010205582 |
| UNC93B1  | 2099.568891 | 0.325169428  | 0.102551637 | 3.170787311  | 0.001520264 | 0.010212185 |
| DBF4     | 134.5106515 | 0.433375716  | 0.136707552 | 3.170093454  | 0.001523899 | 0.010232914 |
| GSDMD    | 981.8058514 | 0.370770901  | 0.116990237 | 3.169246523  | 0.001528347 | 0.010259084 |
| PPP1R3G  | 21.24972721 | -0.804097976 | 0.253951703 | -3.166342126 | 0.001543691 | 0.010358351 |
| NIP7     | 458.8082975 | 0.261741059  | 0.082707569 | 3.164656673  | 0.001552266 | 0.010414786 |
| NCLN     | 1749.455975 | 0.445177153  | 0.140739746 | 3.163123173  | 0.001560863 | 0.010466037 |
| LRRC59   | 3418.658821 | 0.171916097  | 0.054369218 | 3.162011586  | 0.001566833 | 0.010502292 |
| NT5C3L   | 512.1131076 | -0.195525498 | 0.061841598 | -3.161714839 | 0.001568431 | 0.010508667 |
| XPC      | 449.2272546 | 0.254811905  | 0.080595223 | 3.161625426  | 0.001568912 | 0.010508667 |
| RAB3IP   | 47.71223743 | 0.397982948  | 0.12590895  | 3.160878928  | 0.001572939 | 0.01053185  |
| KLF3     | 716.7259118 | -0.438678974 | 0.138821644 | -3.16001857  | 0.001577591 | 0.010559205 |
| CPNE2    | 477.1283422 | -0.304743651 | 0.09646879  | -3.158986982 | 0.001583186 | 0.010589046 |
| PSMB8    | 473.8056281 | 0.676918235  | 0.214278759 | 3.159054305  | 0.00158282  | 0.010589046 |
| GLB1     | 2051.180716 | -0.193894426 | 0.061392471 | -3.158276963 | 0.001587047 | 0.010611063 |
| CCR5     | 200.0246814 | 0.478090675  | 0.151393298 | 3.157938175  | 0.001588893 | 0.010619592 |

|           |             |              |             |              |             |             |
|-----------|-------------|--------------|-------------|--------------|-------------|-------------|
| CTDSPL    | 16.11741134 | -0.66972718  | 0.212268643 | -3.155092386 | 0.001604473 | 0.010719881 |
| LOC100630 | 31.94393811 | -0.483945285 | 0.153405509 | -3.154679964 | 0.001606743 | 0.010731197 |
| PARVA     | 29.01877095 | 0.629379324  | 0.199520222 | 3.154463828  | 0.001607933 | 0.010735301 |
| NT5C3     | 205.3374515 | 0.255583199  | 0.081031444 | 3.154123707  | 0.001609808 | 0.010741953 |
| SPATS2L   | 214.6440415 | 0.527676109  | 0.167299849 | 3.154074023  | 0.001610082 | 0.010741953 |
| C12orf52  | 42.24894455 | -0.43023272  | 0.13642335  | -3.153658951 | 0.001612374 | 0.010753392 |
| A2M-AS1   | 6.170685012 | -1.001202989 | 0.317520051 | -3.153196113 | 0.001614933 | 0.010766603 |
| CHPF      | 95.52142091 | 0.405521609  | 0.128690194 | 3.151146146  | 0.001626311 | 0.010838583 |
| NMNAT1    | 191.3877544 | -0.266511531 | 0.084614128 | -3.149728517 | 0.001634222 | 0.010887416 |
| RASGRF1   | 5.298777982 | 1.54921508   | 0.492245403 | 3.147241338  | 0.001648189 | 0.010976536 |
| R3HDM4    | 289.3626082 | 0.328109095  | 0.104303084 | 3.145727645  | 0.001656742 | 0.011029558 |
| ATP7B     | 2.304494542 | -1.53692025  | 0.488724846 | -3.144755711 | 0.001662256 | 0.011062312 |
| NRGN      | 7.834050104 | -1.052995694 | 0.334861531 | -3.144570504 | 0.001663308 | 0.011065365 |
| EIF4G1    | 5490.374625 | 0.310719618  | 0.098826351 | 3.144096849  | 0.001666003 | 0.011079336 |
| CAMK2G    | 45.37579155 | -0.452402855 | 0.143908634 | -3.143681123 | 0.001668371 | 0.011091128 |
| TIE1      | 142.9915282 | 0.594709581  | 0.189183766 | 3.143555033  | 0.00166909  | 0.01109195  |
| FKBP7     | 4.439848149 | -1.409963123 | 0.448552146 | -3.143365013 | 0.001670174 | 0.011095197 |
| KDM5B     | 211.8328135 | 0.25191326   | 0.080149006 | 3.143061552  | 0.001671907 | 0.011101761 |
| TTLL4     | 610.3593322 | -0.246858567 | 0.078542756 | -3.142983266 | 0.001672354 | 0.011101761 |
| ABCB5     | 23.1747584  | 0.876447914  | 0.278914484 | 3.142353528  | 0.001675955 | 0.011121707 |
| PWWP2B    | 116.2006863 | -0.290489661 | 0.092455127 | -3.141952979 | 0.00167825  | 0.011132968 |
| FAM58A    | 119.6934739 | -0.243645506 | 0.077555159 | -3.141577029 | 0.001680406 | 0.011143304 |
| COX5B     | 2298.550961 | 0.209373763  | 0.066658309 | 3.14100022   | 0.001683719 | 0.011161302 |
| B2M       | 91742.52397 | 0.307808487  | 0.098042207 | 3.139550766  | 0.001692071 | 0.011212678 |
| FBXO18    | 6.983741726 | -0.80626917  | 0.256874545 | -3.138766315 | 0.001696607 | 0.011234745 |
| LIPA      | 24559.56893 | -0.419713465 | 0.133716024 | -3.138841958 | 0.001696169 | 0.011234745 |
| OSBPL1A   | 834.9354648 | -0.34944065  | 0.111350121 | -3.138215265 | 0.0016998   | 0.011251891 |
| GPANK1    | 132.8001761 | 0.27304976   | 0.087039603 | 3.137074975  | 0.001706425 | 0.01128934  |
| HLTF      | 188.4394649 | -0.423171735 | 0.134895531 | -3.137033029 | 0.001706669 | 0.01128934  |
| PIGM      | 87.65192573 | -0.460131412 | 0.146761073 | -3.13524154  | 0.001717127 | 0.011354485 |
| GATAD2A   | 1772.913977 | 0.163123263  | 0.052030775 | 3.13513037   | 0.001717778 | 0.011354759 |
| MOB3A     | 403.6884731 | -0.35051133  | 0.111816935 | -3.13468912  | 0.001720363 | 0.011367818 |
| PSMC1     | 988.1412311 | 0.233354     | 0.074458956 | 3.133995061  | 0.001724438 | 0.011390702 |
| EFCAB11   | 24.43763349 | -0.555968235 | 0.177412902 | -3.133753116 | 0.00172586  | 0.011396058 |
| METTL2A   | 123.6061101 | 0.218498297  | 0.069735096 | 3.133261561  | 0.001728753 | 0.011411118 |
| POFUT2    | 189.6774174 | -0.266898003 | 0.085190189 | -3.132966442 | 0.001730492 | 0.011418553 |
| TCEB1     | 1763.271049 | 0.201399583  | 0.064342676 | 3.130108915  | 0.001747415 | 0.011526135 |
| METTL20   | 6.884781635 | -0.819645036 | 0.261911469 | -3.129473628 | 0.001751198 | 0.011547    |
| RPP30     | 29.76182976 | 0.332286017  | 0.106217822 | 3.128345236  | 0.001757936 | 0.011587327 |
| ARL14EP   | 131.2336591 | -0.429888976 | 0.137435434 | -3.127934068 | 0.001760397 | 0.011599445 |
| NMRK1     | 168.2765282 | -0.292116594 | 0.093440027 | -3.126246895 | 0.001770528 | 0.011662081 |
| YWHAB     | 1961.050331 | -0.261806231 | 0.083748881 | -3.126086325 | 0.001771495 | 0.011664327 |
| SERPINH1  | 498.0027635 | 0.270631395  | 0.086576522 | 3.125921308  | 0.00177249  | 0.011666752 |
| BMF       | 506.5837015 | -0.384537489 | 0.123047438 | -3.12511576  | 0.001777351 | 0.011694618 |
| FUT10     | 162.9540745 | -0.264162958 | 0.084549469 | -3.124359751 | 0.001781924 | 0.011720572 |
| ARHGEF12  | 321.8570081 | 0.351438412  | 0.112495952 | 3.124009416  | 0.001784047 | 0.011730395 |
| CACYBP    | 395.5056863 | -0.378798677 | 0.121262344 | -3.123794783 | 0.001785349 | 0.011734814 |
| UAP1L1    | 364.8028273 | -0.260730159 | 0.083480226 | -3.12325649  | 0.001788618 | 0.011752154 |
| FAM171A2  | 4.922047081 | -1.582846739 | 0.507078374 | -3.121503147 | 0.001799303 | 0.011818194 |

|          |             |              |             |              |             |              |
|----------|-------------|--------------|-------------|--------------|-------------|--------------|
| RPL35A   | 46.34760945 | -0.799430618 | 0.256124617 | -3.121256478 | 0.001800811 | 0.011823931  |
| STK11    | 219.4246312 | -0.354822209 | 0.113694036 | -3.120851561 | 0.001803289 | 0.01183603   |
| CBLB     | 115.7055095 | 0.356125422  | 0.114145013 | 3.119938524  | 0.001808888 | 0.011868597  |
| SPINT2   | 1158.936739 | -0.284127853 | 0.091101727 | -3.11879767  | 0.001815906 | 0.011910452  |
| C20orf96 | 85.06190818 | -0.400875727 | 0.128548174 | -3.118486351 | 0.001817826 | 0.011918847  |
| FER1L6   | 5.745733    | 1.322510164  | 0.424175347 | 3.117838346  | 0.001821827 | 0.011940881  |
| SLU7     | 1216.481856 | 0.175992329  | 0.056460225 | 3.117102872  | 0.001826378 | 0.011966503  |
| AP3S2    | 319.0502694 | 0.158828152  | 0.050985901 | 3.115138663  | 0.001838585 | 0.012042244  |
| CLEC10A  | 13.04055858 | -1.104990952 | 0.35515994  | -3.111248841 | 0.001862979 | 0.012197732  |
| FAM213A  | 962.7127501 | 0.33345135   | 0.107204026 | 3.110436831  | 0.001868108 | 0.012227023  |
| ARHGEF9  | 65.33461659 | -0.452990575 | 0.145641708 | -3.110308034 | 0.001868923 | 0.012228061  |
| SOBP     | 42.03315843 | 0.577579534  | 0.185705878 | 3.110184457  | 0.001869705 | 0.012228884  |
| CEP135   | 97.50764486 | 0.31968344   | 0.102824726 | 3.109013283  | 0.001877133 | 0.0122273155 |
| PSMB1    | 1806.523254 | 0.188364444  | 0.060590628 | 3.108804978  | 0.001878457 | 0.0122275458 |
| TRIM21   | 373.0688159 | 0.378404396  | 0.12172234  | 3.108750586  | 0.001878802 | 0.0122275458 |
| MFN1     | 287.4845198 | 0.406931026  | 0.130934073 | 3.107907798  | 0.001884168 | 0.012306202  |
| PPP1R16B | 26.94008548 | 0.944993751  | 0.304164614 | 3.106849741  | 0.001890925 | 0.012346003  |
| HOMER1   | 317.9751302 | 0.396159815  | 0.127526883 | 3.106480797  | 0.001893286 | 0.01235709   |
| TMEM187  | 52.76764989 | -0.344139317 | 0.110810532 | -3.105655297 | 0.001898579 | 0.012387297  |
| MLKL     | 427.9323939 | 0.322749339  | 0.103928121 | 3.1055054    | 0.001899542 | 0.012389239  |
| XBP1     | 1075.736607 | 0.326369679  | 0.105107954 | 3.105090224  | 0.00190221  | 0.012402302  |
| CAST     | 3413.295003 | 0.18240945   | 0.05877865  | 3.103328334  | 0.001913572 | 0.012467658  |
| ZNHIT1   | 418.2844113 | -0.2485699   | 0.080097433 | -3.103344144 | 0.00191347  | 0.012467658  |
| CMTM6    | 1284.996899 | 0.285784126  | 0.092116185 | 3.102431183  | 0.001919382 | 0.012501139  |
| PCED1A   | 326.6999937 | -0.280378691 | 0.090482817 | -3.098695437 | 0.001943747 | 0.012655411  |
| SCARB2   | 2793.844922 | 0.247835875  | 0.080042945 | 3.096286293  | 0.001959611 | 0.012749785  |
| SCML1    | 4.577812203 | 1.390426612  | 0.449060711 | 3.096299851  | 0.001959521 | 0.012749785  |
| CHAMP1   | 126.4193552 | -0.270911827 | 0.087502959 | -3.096030488 | 0.001961302 | 0.012756335  |
| ARHGAP5  | 296.3633157 | 0.302531312  | 0.097786526 | 3.093793421  | 0.00197615  | 0.012848425  |
| CHD1L    | 148.3233096 | -0.315983296 | 0.102165536 | -3.092856046 | 0.001982403 | 0.01288458   |
| PNPLA2   | 1397.141188 | -0.221875139 | 0.071748593 | -3.092397079 | 0.001985471 | 0.012900021  |
| APLN     | 2.381659442 | -1.953634206 | 0.631924869 | -3.091560884 | 0.001991071 | 0.012931902  |
| DYNLL2   | 558.8303794 | -0.22160397  | 0.071691681 | -3.091069536 | 0.001994369 | 0.012944297  |
| LOC28483 | 10.32167142 | -0.972516333 | 0.31461179  | -3.091163021 | 0.001993741 | 0.012944297  |
| ZNF684   | 77.65740876 | 0.418924157  | 0.13554101  | 3.090755748  | 0.001996478 | 0.012953471  |
| RTN2     | 43.83211629 | 0.51973119   | 0.168259446 | 3.088867827  | 0.002009208 | 0.013031529  |
| CD37     | 2678.487686 | -0.498735954 | 0.161471962 | -3.08868454  | 0.002010448 | 0.013035033  |
| FCGRT    | 2044.0235   | -0.433922971 | 0.140516048 | -3.088067005 | 0.00201463  | 0.013057608  |
| SLC35C2  | 899.9722605 | 0.301152809  | 0.09752989  | 3.087800157  | 0.00201644  | 0.013064794  |
| C17orf53 | 8.550639573 | 0.973657718  | 0.315337657 | 3.087667125  | 0.002017343 | 0.0130661    |
| RND3     | 666.7701643 | 0.526395189  | 0.170490347 | 3.087536622  | 0.002018229 | 0.013067297  |
| KCTD6    | 119.4495569 | -0.400463815 | 0.129751208 | -3.086397572 | 0.002025977 | 0.013112908  |
| C17orf61 | 149.5112656 | -0.53363851  | 0.172954966 | -3.085418834 | 0.002032657 | 0.013151573  |
| S100A1   | 97.36324628 | 0.685464109  | 0.222223004 | 3.084577631  | 0.002038414 | 0.013184244  |
| CBX8     | 30.68508212 | -0.389043376 | 0.126181079 | -3.083214848 | 0.002047773 | 0.013240178  |
| ETV5     | 56.1517822  | -0.523939034 | 0.169978691 | -3.082380691 | 0.00205352  | 0.013272736  |
| CHTOP    | 266.8957303 | 0.22354991   | 0.072536862 | 3.081880069  | 0.002056977 | 0.013290468  |
| LRR61    | 32.81771637 | 0.922089221  | 0.299254247 | 3.081290336  | 0.002061056 | 0.013312205  |
| COL7A1   | 9.166648155 | 1.036572731  | 0.336430697 | 3.08108844   | 0.002062454 | 0.01331662   |

|          |             |              |             |              |             |             |
|----------|-------------|--------------|-------------|--------------|-------------|-------------|
| PER3     | 187.2076894 | -0.555242066 | 0.180231319 | -3.080719099 | 0.002065014 | 0.013328529 |
| ALPK1    | 338.9642354 | 0.235586647  | 0.0764896   | 3.079982712  | 0.002070126 | 0.013356901 |
| AGFG2    | 114.1802649 | 0.354191833  | 0.115010048 | 3.07965989   | 0.002072371 | 0.013366757 |
| CYP20A1  | 437.4063655 | -0.186544538 | 0.060578168 | -3.079402089 | 0.002074165 | 0.013373701 |
| RNASEH2B | 183.1586752 | -0.423654674 | 0.137595522 | -3.078985916 | 0.002077065 | 0.013387765 |
| MCM6     | 325.4364921 | -0.294640322 | 0.095697437 | -3.078873686 | 0.002077848 | 0.013388178 |
| FAM72A   | 23.06538926 | 0.70326603   | 0.228450829 | 3.078413125  | 0.002081062 | 0.013399623 |
| GABRR2   | 10.02908569 | 1.001465333  | 0.325311838 | 3.078477993  | 0.002080609 | 0.013399623 |
| PPDPF    | 1687.000681 | 0.27152247   | 0.088237606 | 3.077174022  | 0.002089733 | 0.013450804 |
| MGST3    | 7483.109368 | -0.184908373 | 0.06011728  | -3.075794064 | 0.002099428 | 0.013508543 |
| SULT1C2  | 116.6191906 | 1.001729004  | 0.325829278 | 3.074398384  | 0.002109276 | 0.013567222 |
| NCKAP1L  | 4335.890184 | -0.216749811 | 0.070575379 | -3.071181664 | 0.002132134 | 0.013709518 |
| FAM172A  | 178.7848048 | -0.250157487 | 0.08146914  | -3.070579713 | 0.002136436 | 0.013727729 |
| MIOS     | 212.7495037 | -0.27331711  | 0.089011579 | -3.070579287 | 0.00213644  | 0.013727729 |
| SPR      | 727.7664418 | 0.391477207  | 0.127508154 | 3.070213111  | 0.002139061 | 0.013739834 |
| PSTPIP1  | 79.70445147 | 0.498600797  | 0.162439768 | 3.069450315  | 0.002144531 | 0.013770223 |
| AGPAT9   | 1086.683378 | 0.41519004   | 0.135326667 | 3.06805782   | 0.002154549 | 0.013829568 |
| MAPK1    | 987.9074292 | 0.229466881  | 0.074794622 | 3.067959622  | 0.002155257 | 0.013829568 |
| ASAP1    | 2411.066535 | 0.337191093  | 0.10992466  | 3.067474522  | 0.002158759 | 0.013847266 |
| FAM122B  | 471.3556555 | 0.321229256  | 0.104759582 | 3.066347251  | 0.002166915 | 0.013894801 |
| FAM210B  | 299.670349  | -0.211700458 | 0.069060477 | -3.065435777 | 0.002173531 | 0.013932428 |
| ICT1     | 274.0111777 | 0.15434768   | 0.050352735 | 3.065328612  | 0.00217431  | 0.013932629 |
| THAP11   | 400.4653724 | -0.213718616 | 0.069731548 | -3.064876967 | 0.002177596 | 0.013948888 |
| ZNF362   | 93.72794188 | -0.556714924 | 0.181718648 | -3.063609212 | 0.002186844 | 0.014003314 |
| CLEC12A  | 204.6787188 | -0.472532151 | 0.154247422 | -3.063468706 | 0.002187871 | 0.014005079 |
| RFX5     | 664.8439057 | 0.20662151   | 0.067476944 | 3.062105315  | 0.002197861 | 0.014064198 |
| NFKBID   | 107.0834909 | 0.253689057  | 0.082855    | 3.061843688  | 0.002199783 | 0.014066834 |
| TXNIP    | 4768.671732 | -0.364896285 | 0.119174091 | -3.061875973 | 0.002199546 | 0.014066834 |
| COMMD1   | 790.951949  | 0.120346103  | 0.039309896 | 3.061470915  | 0.002202524 | 0.01407953  |
| ACTRT3   | 14.33250132 | 0.825542924  | 0.269733111 | 3.060591714  | 0.002209001 | 0.014116092 |
| FUZ      | 73.78702832 | -0.330304623 | 0.107944822 | -3.059939482 | 0.002213817 | 0.014140776 |
| KLF12    | 16.08243766 | -0.5436895   | 0.177684253 | -3.05986316  | 0.002214381 | 0.014140776 |
| CCNB2    | 81.11695789 | 0.391674598  | 0.128091916 | 3.057762035  | 0.002229966 | 0.014235417 |
| LYRM5    | 33.94477993 | -0.581121972 | 0.190137191 | -3.056329857 | 0.002240646 | 0.014298698 |
| CLIC1    | 19142.79987 | 0.217339649  | 0.071130502 | 3.055505619  | 0.002246814 | 0.01433315  |
| MGC57346 | 28.92585302 | -0.388672588 | 0.127211407 | -3.055328109 | 0.002248144 | 0.014336728 |
| C1GALT1  | 185.0713197 | 0.257111243  | 0.084173964 | 3.054522207  | 0.002254193 | 0.014370386 |
| CDC20    | 5.996617461 | 0.948136182  | 0.310474039 | 3.053834017  | 0.00225937  | 0.014398464 |
| CENPN    | 173.165469  | 0.359500461  | 0.117743092 | 3.053261605  | 0.002263685 | 0.014418651 |
| PLCL1    | 56.31990623 | 0.504205802  | 0.165139656 | 3.053208503  | 0.002264086 | 0.014418651 |
| ATP6V0D2 | 708.9643495 | 0.244431967  | 0.08007427  | 3.052565661  | 0.002268941 | 0.014444634 |
| MYO9B    | 1812.755903 | -0.326877716 | 0.107112346 | -3.051727719 | 0.002275284 | 0.014480068 |
| TMEM199  | 325.1672549 | 0.213571066  | 0.070000073 | 3.051012048  | 0.002280714 | 0.014509672 |
| PDLIM2   | 49.85252006 | -0.501169386 | 0.164326116 | -3.049846227 | 0.002289586 | 0.014561139 |
| DUT      | 159.4611087 | -0.56094498  | 0.183962796 | -3.049230561 | 0.002294283 | 0.014576091 |
| SLMO2    | 791.0387835 | 0.276627962  | 0.090718642 | 3.04929565   | 0.002293786 | 0.014576091 |
| TSPAN14  | 1119.406184 | -0.225802269 | 0.074051215 | -3.049271647 | 0.00229397  | 0.014576091 |
| PPP1R3B  | 105.1453876 | -0.295031427 | 0.096765554 | -3.048930269 | 0.002296578 | 0.014585696 |
| NEDD9    | 43.2067207  | 0.547995753  | 0.179745686 | 3.048728266  | 0.002298122 | 0.014590533 |

|           |             |              |             |              |             |             |
|-----------|-------------|--------------|-------------|--------------|-------------|-------------|
| YES1      | 43.94940369 | 0.607397233  | 0.19927707  | 3.048003631  | 0.002303671 | 0.014620781 |
| SH2D3A    | 7.701381835 | 1.129159251  | 0.370477102 | 3.047851664  | 0.002304837 | 0.01462225  |
| TTC39C    | 46.58919178 | -0.531400068 | 0.174357079 | -3.047768806 | 0.002305472 | 0.01462225  |
| GK        | 7.650494043 | 1.128928683  | 0.370570391 | 3.04646218   | 0.002315516 | 0.014680955 |
| C7orf57   | 10.66785673 | 1.093902262  | 0.359088286 | 3.046332351  | 0.002316516 | 0.0146823   |
| PION      | 1583.860974 | -0.207605184 | 0.068153824 | -3.046126727 | 0.002318101 | 0.014682358 |
| TCEAL4    | 406.0828091 | -0.332013499 | 0.108992999 | -3.046191062 | 0.002317605 | 0.014682358 |
| CD163     | 2979.225706 | -0.334608825 | 0.109911151 | -3.044357384 | 0.00233178  | 0.014763976 |
| GLT8D1    | 295.0163475 | -0.218771146 | 0.071875091 | -3.043768632 | 0.002336347 | 0.014783354 |
| PSMA6     | 3168.61351  | 0.501741818  | 0.164842852 | 3.043758407  | 0.002336427 | 0.014783354 |
| MLLT3     | 8.887001522 | -0.728709556 | 0.239429281 | -3.043527309 | 0.002338222 | 0.014789692 |
| ZDHHCS    | 836.6449565 | 0.221800558  | 0.072894886 | 3.042745091  | 0.002344308 | 0.014823156 |
| NXF1      | 541.5848101 | 0.274903019  | 0.090415965 | 3.040425651  | 0.00236244  | 0.014932547 |
| PI4KB     | 575.1121421 | 0.258127468  | 0.084901209 | 3.040327351  | 0.002363211 | 0.014932547 |
| GPR157    | 372.8857654 | 0.390258546  | 0.128372154 | 3.040056077  | 0.002365341 | 0.014937757 |
| PVRL4     | 17.01511309 | 0.896265619  | 0.29482246  | 3.040018116  | 0.002365639 | 0.014937757 |
| ZMYM6     | 263.3285561 | -0.224851233 | 0.073975059 | -3.03955463  | 0.002369282 | 0.014955693 |
| TMEM241   | 65.41699992 | 0.396097784  | 0.130332577 | 3.039131067  | 0.002372616 | 0.014971665 |
| C1orf63   | 135.5555841 | 0.261624651  | 0.0861022   | 3.038536189  | 0.002377305 | 0.014986032 |
| GALNT6    | 226.7926835 | 0.30088957   | 0.09902361  | 3.038563936  | 0.002377087 | 0.014986032 |
| SIX5      | 6.087914807 | 1.445797205  | 0.475808952 | 3.038608667  | 0.002376734 | 0.014986032 |
| SAT1      | 11231.837   | 0.46797194   | 0.154050301 | 3.037786601  | 0.002383227 | 0.015018277 |
| MAT2B     | 1335.933858 | 0.272076498  | 0.089590545 | 3.036888518  | 0.002390338 | 0.015052912 |
| PPM1K     | 286.6415563 | 0.276024141  | 0.090887625 | 3.036982668  | 0.002389592 | 0.015052912 |
| EXOC6B    | 135.4751207 | -0.246822402 | 0.081282175 | -3.036611683 | 0.002392535 | 0.015061652 |
| SF3B4     | 40.66831712 | 0.612383416  | 0.201703863 | 3.036051993  | 0.00239698  | 0.015084542 |
| GPRIN3    | 1169.398086 | -0.314888146 | 0.103722258 | -3.035878235 | 0.002398362 | 0.015088142 |
| APLP2     | 9983.554579 | -0.376720217 | 0.124151505 | -3.034358842 | 0.002410475 | 0.015159229 |
| HTATIP2   | 360.1380224 | 0.274961438  | 0.090647757 | 3.033295538  | 0.002418986 | 0.015207618 |
| MSL3      | 422.5764203 | 0.327125851  | 0.107859695 | 3.032883153  | 0.002422294 | 0.015223279 |
| STAC2     | 10.68488804 | 0.767802082  | 0.253202007 | 3.032369648  | 0.002426419 | 0.015244061 |
| BLOC1S5   | 319.0109588 | 0.172327656  | 0.056834044 | 3.03212029   | 0.002428424 | 0.015251518 |
| PPAPDC1B  | 209.3371214 | 0.217522532  | 0.071764107 | 3.031076982  | 0.002436831 | 0.015299161 |
| STX8      | 308.8813071 | -0.210532103 | 0.069479331 | -3.030140044 | 0.002444404 | 0.015341535 |
| TMEM42    | 64.90224643 | -0.301540601 | 0.09956699  | -3.028519806 | 0.00245755  | 0.015418849 |
| HYOU1     | 1050.004333 | 0.168054497  | 0.055494953 | 3.028284332  | 0.002459466 | 0.015423236 |
| THBD      | 361.8829732 | -0.476590566 | 0.15738253  | -3.028230423 | 0.002459904 | 0.015423236 |
| KCNIP2    | 6.019727718 | -1.012772487 | 0.334498066 | -3.027737946 | 0.002463917 | 0.015443195 |
| CPT1A     | 506.4855142 | -0.255409319 | 0.084361282 | -3.027565656 | 0.002465322 | 0.015446806 |
| CSPG4     | 66.32239783 | 0.615372794  | 0.203307419 | 3.02680934   | 0.002471498 | 0.015476095 |
| VPS37C    | 828.9149528 | 0.218569128  | 0.07221153  | 3.02678987   | 0.002471657 | 0.015476095 |
| ABCB6     | 84.51982537 | 0.557247885  | 0.184119214 | 3.026560199  | 0.002473536 | 0.015482655 |
| CHP1      | 1883.948955 | -0.255725961 | 0.084581219 | -3.023436685 | 0.002499213 | 0.015638126 |
| LOC100126 | 2.764168682 | 2.04917132   | 0.677820933 | 3.023175032  | 0.002501375 | 0.01564115  |
| SETD5     | 442.7445268 | 0.248152317  | 0.082081968 | 3.023225706  | 0.002500956 | 0.01564115  |
| UBE2V1    | 52.60605397 | -0.35253919  | 0.116619651 | -3.022982725 | 0.002502965 | 0.015645842 |
| VDAC1     | 1695.914164 | 0.193787634  | 0.064161395 | 3.020315153  | 0.002525118 | 0.015779023 |
| SNRPA1    | 1024.549959 | 0.3453143    | 0.114363081 | 3.019456065  | 0.00253229  | 0.015818537 |
| NFE2L1    | 1394.893278 | 0.257366242  | 0.085255605 | 3.018760377  | 0.002538112 | 0.01584959  |

|          |             |              |             |              |             |             |
|----------|-------------|--------------|-------------|--------------|-------------|-------------|
| PTK6     | 19.76202606 | 0.700942703  | 0.232246565 | 3.018097184  | 0.002543673 | 0.015878997 |
| PSMB4    | 2932.533854 | 0.205735753  | 0.068194916 | 3.016878151  | 0.002553924 | 0.015937652 |
| SUGP2    | 319.183075  | -0.278232237 | 0.092253553 | -3.015951461 | 0.002561743 | 0.015981089 |
| MRPL30   | 157.2946906 | -0.358778007 | 0.118970188 | -3.015696721 | 0.002563896 | 0.015989167 |
| FAM46C   | 18.00919166 | 0.88024742   | 0.291937764 | 3.015188609  | 0.002568195 | 0.016010621 |
| CYFIP1   | 1993.242374 | -0.192052852 | 0.063721218 | -3.013954517 | 0.002578665 | 0.016070514 |
| DTWD2    | 210.0717051 | -0.369997531 | 0.122790146 | -3.013250999 | 0.00258465  | 0.016102433 |
| TMX2     | 1591.497881 | 0.124919784  | 0.041462981 | 3.012802775  | 0.002588471 | 0.016120844 |
| FAM35A   | 235.1921739 | -0.227535869 | 0.07553103  | -3.012482017 | 0.002591208 | 0.016132498 |
| SLC16A13 | 58.04909117 | 0.458070727  | 0.152078125 | 3.012075061  | 0.002594684 | 0.016148747 |
| KCNJ10   | 10.34692782 | -0.831140189 | 0.275945585 | -3.011971319 | 0.002595571 | 0.016148873 |
| EIF2S3   | 2248.284835 | -0.271015668 | 0.089998036 | -3.011350923 | 0.002600881 | 0.016165889 |
| FOXP1    | 534.3926896 | -0.377579061 | 0.12538541  | -3.011347651 | 0.002600909 | 0.016165889 |
| TNFSF13B | 399.226596  | 0.512064061  | 0.170036886 | 3.011488108  | 0.002599706 | 0.016165889 |
| ADCK2    | 419.8449047 | 0.216194372  | 0.071813427 | 3.010500693  | 0.002608174 | 0.016205637 |
| MFSD7    | 610.7619249 | 0.386985189  | 0.128559703 | 3.010159323  | 0.002611107 | 0.016218455 |
| SRPR     | 1112.328276 | 0.177207026  | 0.058878786 | 3.009692259  | 0.002615125 | 0.016238001 |
| ZNF549   | 24.41379673 | -0.487488623 | 0.162037813 | -3.00848681  | 0.002625522 | 0.016297127 |
| EVI5     | 249.2274306 | -0.289062387 | 0.096119136 | -3.007334412 | 0.002635497 | 0.016353594 |
| EDF1     | 1211.87866  | 0.380836838  | 0.126663283 | 3.006686923  | 0.002641116 | 0.016383009 |
| FAM70A   | 395.9274809 | -0.342221399 | 0.11383009  | -3.006422988 | 0.00264341  | 0.016386598 |
| ZNF192   | 273.363057  | -0.293632738 | 0.097668634 | -3.006417975 | 0.002643454 | 0.016386598 |
| SLC39A13 | 104.4757301 | 0.509312928  | 0.169472055 | 3.005291516  | 0.002653264 | 0.016441944 |
| SGPP1    | 1661.293558 | 0.233311974  | 0.077689123 | 3.003148523  | 0.00267202  | 0.016552666 |
| PLAGL1   | 215.6643463 | 0.291634004  | 0.097217748 | 2.999802095  | 0.002701551 | 0.016724484 |
| WDR77    | 251.4307619 | -0.239590439 | 0.079868693 | -2.99980419  | 0.002701532 | 0.016724484 |
| ATP5G2   | 2981.348376 | -0.312988397 | 0.10434399  | -2.999582407 | 0.0027035   | 0.016725437 |
| LPIN2    | 917.5203405 | 0.221964224  | 0.073997082 | 2.999634818  | 0.002703035 | 0.016725437 |
| GSK3A    | 1374.413847 | 0.174140807  | 0.058069447 | 2.998837039  | 0.002710122 | 0.016760842 |
| SULT1B1  | 2.998259921 | -2.290102417 | 0.76407151  | -2.997235713 | 0.0027244   | 0.016843551 |
| MECR     | 59.9650716  | -0.37487735  | 0.125091735 | -2.996819491 | 0.002728122 | 0.01686097  |
| FAAH     | 3.847854408 | -1.252390377 | 0.417986037 | -2.996249314 | 0.002733229 | 0.016886931 |
| CHAF1B   | 17.79743188 | 0.575332488  | 0.192044995 | 2.995821302  | 0.002737068 | 0.016905045 |
| PPM1H    | 51.09071568 | -0.637972984 | 0.212991559 | -2.995297034 | 0.002741777 | 0.01692852  |
| RGS19    | 141.0636184 | -0.326582724 | 0.10903705  | -2.995153711 | 0.002743066 | 0.016930867 |
| AIFM3    | 34.74162815 | -0.496802197 | 0.165886796 | -2.994826647 | 0.002746009 | 0.01693781  |
| SMARCC1  | 616.1174155 | -0.233443599 | 0.077947227 | -2.994892908 | 0.002745412 | 0.01693781  |
| SPTAN1   | 2344.087271 | 0.382629411  | 0.127776931 | 2.994510878  | 0.002748853 | 0.016949741 |
| DDRGK1   | 1013.091751 | 0.200618518  | 0.067023327 | 2.993264085  | 0.002760108 | 0.017013514 |
| NOTCH1   | 494.9484348 | -0.401898467 | 0.134377379 | -2.99081937  | 0.0027823   | 0.017144637 |
| EIF2C4   | 581.3826222 | -0.230598765 | 0.07713276  | -2.989634569 | 0.002793114 | 0.017205581 |
| KLHL28   | 207.4162062 | 0.339864612  | 0.113699543 | 2.989146681  | 0.002797578 | 0.017227385 |
| TWF1     | 482.8518498 | 0.243727754  | 0.081542716 | 2.988958009  | 0.002799306 | 0.017232332 |
| C3orf58  | 9.268918075 | -0.910977178 | 0.304799382 | -2.988776327 | 0.002800971 | 0.017236887 |
| TUT1     | 233.791975  | 0.257878643  | 0.086287556 | 2.988595971  | 0.002802625 | 0.017241369 |
| FNBP1    | 1574.507022 | -0.319773729 | 0.107107727 | -2.98553371  | 0.002830839 | 0.017409195 |
| CLINT1   | 543.7027358 | 0.293815834  | 0.09842709  | 2.985111446  | 0.00283475  | 0.017427495 |
| SEPT7P2  | 71.39480855 | -0.384525149 | 0.12883558  | -2.984619227 | 0.002839315 | 0.017449802 |
| BICD2    | 678.586998  | -0.1807511   | 0.060627154 | -2.98135552  | 0.002869754 | 0.017631058 |

|           |             |              |             |              |             |             |
|-----------|-------------|--------------|-------------|--------------|-------------|-------------|
| LCN2      | 21.84452345 | 1.49323518   | 0.501467483 | 2.977730822  | 0.002903909 | 0.01782914  |
| RABGAP1   | 496.7986492 | -0.176949796 | 0.059423914 | -2.977753966 | 0.00290369  | 0.01782914  |
| DTWD1     | 88.70549653 | -0.488518883 | 0.164067715 | -2.977544255 | 0.002905677 | 0.017834119 |
| REV3L     | 104.0331336 | -0.518606745 | 0.174288359 | -2.97556732  | 0.002924472 | 0.017943564 |
| SNRPD3    | 580.1792208 | -0.162811825 | 0.054732894 | -2.974661337 | 0.002933122 | 0.017990714 |
| KLF4      | 159.7449052 | -0.2748166   | 0.092407277 | -2.973971424 | 0.002939725 | 0.01802528  |
| COL11A2   | 77.11149688 | 1.001370071  | 0.336762692 | 2.97351843   | 0.002944067 | 0.01804597  |
| SLC48A1   | 281.2763934 | -0.395536026 | 0.133058899 | -2.972638657 | 0.002952518 | 0.01809182  |
| SAMD8     | 141.0979442 | 0.350152038  | 0.117864774 | 2.970794644  | 0.002970303 | 0.018194816 |
| FKBP1A    | 5687.526787 | 0.30259989   | 0.101874058 | 2.970333148  | 0.00297477  | 0.018216186 |
| CMC2      | 570.7972807 | 0.244791827  | 0.08242335  | 2.969933007  | 0.002978647 | 0.018230897 |
| MYL5      | 13.28255683 | 0.777800487  | 0.261895972 | 2.969883348  | 0.002979129 | 0.018230897 |
| MAPK1IP1  | 2479.28022  | 0.239308949  | 0.080591869 | 2.969393205  | 0.002983885 | 0.01825401  |
| RRAGB     | 178.9588537 | -0.269827727 | 0.090879532 | -2.969070372 | 0.002987022 | 0.018267202 |
| GRAMD4    | 12.04000392 | -1.02115593  | 0.344097894 | -2.967632024 | 0.003001034 | 0.018346871 |
| ZNF430    | 487.6216724 | 0.354805271  | 0.119568208 | 2.967388053  | 0.003003416 | 0.018355415 |
| C21orf7   | 63.91971226 | 0.560963905  | 0.189074499 | 2.96689351   | 0.003008251 | 0.018363463 |
| NXPE3     | 261.4679231 | -0.345053205 | 0.116302874 | -2.966850201 | 0.003008675 | 0.018363463 |
| PRKCB     | 194.8894398 | -0.323216313 | 0.108941177 | -2.966888381 | 0.003008301 | 0.018363463 |
| SETMAR    | 25.74618664 | 0.594723723  | 0.20045137  | 2.966922715  | 0.003007966 | 0.018363463 |
| ELOVL5    | 2745.610389 | 0.301467631  | 0.101652983 | 2.965654537  | 0.003020396 | 0.018428962 |
| IL6R      | 437.7226791 | 0.467368459  | 0.157603388 | 2.965472155  | 0.003022187 | 0.018433857 |
| GNB4      | 275.6512343 | -0.362546911 | 0.122269777 | -2.965139231 | 0.00302546  | 0.01844778  |
| SMTN      | 11.24184177 | 0.896283066  | 0.302343467 | 2.964453228  | 0.003032213 | 0.018482912 |
| GCNT4     | 2.537944661 | 2.770206276  | 0.934781435 | 2.963480202  | 0.003041816 | 0.018535384 |
| SKP2      | 87.73319988 | -0.351414179 | 0.118588426 | -2.963309252 | 0.003043506 | 0.01853962  |
| TXNDC5    | 582.4624769 | -0.284568662 | 0.096053849 | -2.962595109 | 0.003050575 | 0.018576609 |
| KIF16B    | 577.2018404 | -0.302438351 | 0.102113797 | -2.961777553 | 0.003058687 | 0.018619918 |
| PCTP      | 146.9852294 | -0.273807086 | 0.092450741 | -2.961653765 | 0.003059917 | 0.018621321 |
| ASMTL     | 67.79125928 | -0.364208817 | 0.123011134 | -2.960779272 | 0.003068618 | 0.018668176 |
| DENND5B   | 39.52542545 | 0.417094385  | 0.140926701 | 2.959654791  | 0.003079839 | 0.018729946 |
| HIST1H3I  | 264.9907948 | -0.420468139 | 0.14207114  | -2.959560544 | 0.003080782 | 0.018729946 |
| GCSHP3    | 214.0004676 | -0.347836959 | 0.117561063 | -2.958776904 | 0.003088626 | 0.018771513 |
| RP9       | 114.8772132 | -0.308489887 | 0.10427901  | -2.958312389 | 0.003093285 | 0.018793697 |
| MYCBP2    | 397.9711637 | -0.235254006 | 0.079527793 | -2.958135733 | 0.003095058 | 0.018798342 |
| ADRA2B    | 60.87185935 | 0.67772089   | 0.229155938 | 2.957465978  | 0.00310179  | 0.018833089 |
| RBBP9     | 212.6222792 | 0.269624117  | 0.091186556 | 2.956840652  | 0.003108087 | 0.018865177 |
| PDCD4     | 1150.078834 | -0.26392055  | 0.089278391 | -2.956152623 | 0.003115029 | 0.018901156 |
| ZNF329    | 75.01889339 | -0.308539272 | 0.104394725 | -2.955506355 | 0.003121563 | 0.018934635 |
| ITM2B     | 7908.983431 | -0.189278947 | 0.06408633  | -2.953499552 | 0.003141931 | 0.01905198  |
| CECR2     | 24.95720704 | 0.555546722  | 0.188111396 | 2.953285844  | 0.003144107 | 0.019058974 |
| CD7       | 36.38193142 | 0.941954488  | 0.319017104 | 2.95267707   | 0.003150313 | 0.01908418  |
| DPH3      | 567.6448453 | 0.183257271  | 0.062063017 | 2.952761248  | 0.003149454 | 0.01908418  |
| RYBP      | 174.9309873 | 0.29766121   | 0.10081864  | 2.952442228  | 0.003152711 | 0.019092496 |
| AMD1      | 1540.110121 | 0.159403363  | 0.054032444 | 2.950141648  | 0.003176283 | 0.019228997 |
| CHCHD6    | 41.20189351 | -0.437742487 | 0.148416007 | -2.94942909  | 0.003183616 | 0.019267134 |
| GIMAP4    | 115.0730721 | 0.50347679   | 0.170760237 | 2.9484428    | 0.003193792 | 0.019322444 |
| NANOS1    | 41.39224889 | 0.645455417  | 0.218924991 | 2.948294821  | 0.003195322 | 0.019325422 |
| LOC15038: | 64.26811599 | -0.522654334 | 0.177537111 | -2.943915966 | 0.00324088  | 0.019594599 |

|           |             |              |             |              |             |             |
|-----------|-------------|--------------|-------------|--------------|-------------|-------------|
| OSBPL8    | 1825.881673 | 0.225203783  | 0.076515462 | 2.943245429  | 0.003247908 | 0.019630724 |
| HRASLS    | 14.6142336  | -0.843546206 | 0.286622428 | -2.943057218 | 0.003249883 | 0.019636293 |
| CXCL16    | 6937.211303 | 0.303994772  | 0.103310363 | 2.942539011  | 0.003255328 | 0.019662812 |
| GPR108    | 839.8588954 | 0.268004268  | 0.091128707 | 2.940942278  | 0.003272155 | 0.01974689  |
| KL        | 67.48706475 | -0.533682202 | 0.181459419 | -2.941055393 | 0.00327096  | 0.01974689  |
| ORC6      | 30.51064487 | -0.619026808 | 0.210487715 | -2.940916571 | 0.003272427 | 0.01974689  |
| WDR19     | 36.91633366 | -0.398879699 | 0.135642648 | -2.94066582  | 0.003275077 | 0.019756483 |
| LSS       | 14.38685257 | 0.867930728  | 0.295206339 | 2.94008161   | 0.003281258 | 0.019787367 |
| KIFC2     | 37.84326285 | -0.42548725  | 0.144724482 | -2.939981155 | 0.003282322 | 0.019787379 |
| PPAP2B    | 2213.355664 | 0.226983946  | 0.07722182  | 2.939375775  | 0.003288741 | 0.019819662 |
| PYROXD1   | 558.0645578 | 0.32602153   | 0.110942526 | 2.938652484  | 0.003296425 | 0.019859546 |
| RPS6KA2   | 631.4004431 | -0.450361579 | 0.153276644 | -2.938227029 | 0.003300952 | 0.019880394 |
| RC3H2     | 420.0106502 | -0.193646898 | 0.065909324 | -2.938080477 | 0.003302513 | 0.019883368 |
| GPER      | 11.81112302 | 1.117962735  | 0.380580181 | 2.937522209  | 0.003308465 | 0.019912769 |
| ACADVL    | 633.934933  | 0.26369795   | 0.089799674 | 2.936513443  | 0.003319244 | 0.019964751 |
| LRPPRC    | 703.4646423 | -0.227979004 | 0.077635587 | -2.936527075 | 0.003319098 | 0.019964751 |
| SLC22A16  | 27.76117747 | -0.837830456 | 0.285463481 | -2.934982973 | 0.00333566  | 0.020057014 |
| TMIE      | 3.352468301 | -1.686094763 | 0.574800705 | -2.933355421 | 0.003353198 | 0.020155964 |
| BTN3A1    | 151.7418936 | 0.295476608  | 0.100743653 | 2.932955076  | 0.003357525 | 0.020175464 |
| MTOR      | 612.0006627 | -0.201869629 | 0.06889877  | -2.929945329 | 0.003390216 | 0.020365343 |
| FDPS      | 346.1061846 | 0.306676575  | 0.104684002 | 2.929545769  | 0.003394578 | 0.020384973 |
| CASP9     | 521.8048322 | 0.186847474  | 0.063787283 | 2.929227682  | 0.003398054 | 0.020399272 |
| HAUS7     | 59.99709714 | -0.426818512 | 0.145728066 | -2.928869668 | 0.00340197  | 0.020416205 |
| MAP3K3    | 438.9042608 | -0.306714241 | 0.10472873  | -2.928654268 | 0.003404329 | 0.020423779 |
| PTDSS1    | 1010.072027 | -0.176994251 | 0.060449444 | -2.927971526 | 0.003411813 | 0.020456785 |
| TMEM176I  | 2695.465186 | -0.362666049 | 0.12386338  | -2.927952135 | 0.003412026 | 0.020456785 |
| JMJD6     | 140.1788744 | 0.51012659   | 0.174271135 | 2.927200703  | 0.003420281 | 0.020499683 |
| P2RY2     | 44.53409947 | 0.559319368  | 0.191099655 | 2.926846559  | 0.003424178 | 0.02051644  |
| PLCG2     | 534.0821283 | -0.27383764  | 0.093565293 | -2.926701031 | 0.00342578  | 0.020519444 |
| CASP3     | 534.3655481 | 0.401844186  | 0.137342401 | 2.925856717  | 0.003435091 | 0.020561994 |
| CD74      | 21552.33768 | -0.228794633 | 0.078195395 | -2.925934881 | 0.003434228 | 0.020561994 |
| SIK1      | 21.44049858 | 0.73250613   | 0.250547226 | 2.923624985  | 0.003459813 | 0.020703325 |
| MTFMT     | 349.2267722 | -0.205111638 | 0.070199922 | -2.921821463 | 0.00347991  | 0.020816897 |
| SDE2      | 332.4482222 | 0.200660795  | 0.068706618 | 2.920545377  | 0.003494193 | 0.020895633 |
| GLCE      | 123.744646  | -0.377716834 | 0.12934717  | -2.920178575 | 0.003498309 | 0.020906826 |
| RBBP7     | 592.4951839 | -0.155017828 | 0.053083982 | -2.920237365 | 0.003497649 | 0.020906826 |
| RGS20     | 16.79297879 | 0.714025457  | 0.244527604 | 2.920019845  | 0.003500091 | 0.020910771 |
| C17orf51  | 79.26190416 | -0.404490904 | 0.138659794 | -2.917146299 | 0.0035325   | 0.021097632 |
| PRKAR2B   | 293.312646  | 0.362904362  | 0.124417712 | 2.916822353  | 0.003536171 | 0.021112788 |
| GTF2E2    | 176.2022327 | 0.280791292  | 0.096326565 | 2.914993302  | 0.003556962 | 0.021216931 |
| OXER1     | 82.48552776 | 0.475770692  | 0.163215355 | 2.914987338  | 0.00355703  | 0.021216931 |
| RGAG4     | 25.56163659 | -0.522725833 | 0.179317428 | -2.915086611 | 0.003555898 | 0.021216931 |
| SENP7     | 86.75331094 | -0.271039365 | 0.093002388 | -2.914326923 | 0.003564564 | 0.021255068 |
| LINC00630 | 23.42068928 | -0.516955331 | 0.177445093 | -2.913325589 | 0.003576015 | 0.021316529 |
| SLAIN2    | 1989.904165 | 0.209528042  | 0.071957697 | 2.911822511  | 0.003593267 | 0.021412519 |
| AUH       | 166.9724948 | -0.174151802 | 0.059814703 | -2.911521628 | 0.00359673  | 0.0214263   |
| PYCARD    | 1035.317164 | -0.350053307 | 0.120293619 | -2.909990649 | 0.003614396 | 0.021524656 |
| RPS16     | 9024.455298 | -0.387568182 | 0.133216126 | -2.909318828 | 0.003622173 | 0.021564078 |
| COQ10A    | 46.12945586 | -0.371855164 | 0.127823508 | -2.909129693 | 0.003624365 | 0.021570237 |

|          |             |              |             |              |             |             |
|----------|-------------|--------------|-------------|--------------|-------------|-------------|
| ASS1     | 41.91398355 | 0.636238607  | 0.218744866 | 2.908587606  | 0.003630654 | 0.021600771 |
| RPS15    | 6480.785083 | -0.209654374 | 0.072098028 | -2.907907189 | 0.003638563 | 0.021640914 |
| SCAF4    | 545.8199582 | 0.181546399  | 0.062469321 | 2.906168916  | 0.003658839 | 0.021754563 |
| PARD3B   | 8.514282347 | -0.943575985 | 0.324696763 | -2.906022148 | 0.003660555 | 0.021757827 |
| HSPA2    | 16.66278784 | 0.865940404  | 0.298022355 | 2.905622305  | 0.003665236 | 0.021765704 |
| NPM1     | 5743.282902 | -0.171343102 | 0.058966135 | -2.905788246 | 0.003663293 | 0.021765704 |
| TCTEX1D2 | 58.41798203 | 0.608581736  | 0.209450622 | 2.905609587  | 0.003665385 | 0.021765704 |
| TCF20    | 56.05390507 | 0.304526688  | 0.1048108   | 2.905489594  | 0.00366679  | 0.021767115 |
| PPP1R10  | 653.9236751 | 0.18001565   | 0.061980535 | 2.90439006   | 0.003679694 | 0.021836758 |
| ZP3      | 7.629980162 | -1.032725818 | 0.355764681 | -2.902834014 | 0.003698026 | 0.021938559 |
| IDUA     | 165.685076  | -0.335772505 | 0.115681999 | -2.90254756  | 0.00370141  | 0.021951644 |
| TSR1     | 180.4448274 | 0.243007807  | 0.083754511 | 2.901429481  | 0.003714644 | 0.022023122 |
| CRHBP    | 2.924090468 | -2.192137558 | 0.755756413 | -2.900587436 | 0.003724639 | 0.022075358 |
| IFNA1    | 69.95491945 | 0.512976833  | 0.176884841 | 2.900061032  | 0.0037309   | 0.022098408 |
| MBOAT7   | 1084.783445 | 0.286467569  | 0.098779706 | 2.900064998  | 0.003730853 | 0.022098408 |
| PRKCD    | 634.1231659 | 0.319933334  | 0.11032726  | 2.899857504  | 0.003733323 | 0.022105735 |
| FNDC3B   | 4506.620646 | 0.1845209    | 0.063658315 | 2.898614262  | 0.003748157 | 0.022186518 |
| MBOAT1   | 200.4248133 | -0.357374457 | 0.123299761 | -2.898419699 | 0.003750483 | 0.022193238 |
| PPP5C    | 272.6751203 | 0.24617465   | 0.084941715 | 2.898159628  | 0.003753595 | 0.022204599 |
| SGK1     | 1.841049853 | -2.951678917 | 1.018761044 | -2.897322128 | 0.003763631 | 0.022256902 |
| SLC11A2  | 1043.676844 | 0.214743761  | 0.074145883 | 2.896233113  | 0.003776717 | 0.022327205 |
| ARHGAP3C | 962.6336294 | -0.308275888 | 0.106463382 | -2.895604873 | 0.003784286 | 0.022364852 |
| BAX      | 859.0719899 | -0.189764586 | 0.065571745 | -2.893999346 | 0.00380369  | 0.022465278 |
| PDHA1    | 1304.590272 | 0.164883333  | 0.056972835 | 2.894069297  | 0.003802842 | 0.022465278 |
| H3F3A    | 5374.595994 | -0.207601827 | 0.071757109 | -2.893118597 | 0.003814372 | 0.022521234 |
| CYP19A1  | 5.262911011 | 2.232308505  | 0.771921552 | 2.891885191  | 0.003829379 | 0.022602673 |
| KLHL7    | 106.3439572 | -0.307446896 | 0.106320399 | -2.891701861 | 0.003831614 | 0.022608704 |
| EMILIN1  | 14.69494292 | 0.825800577  | 0.285624234 | 2.891213272  | 0.003837576 | 0.022636717 |
| ARFGAP3  | 832.4883777 | 0.381301028  | 0.131894801 | 2.890948127  | 0.003840815 | 0.022648655 |
| ABCA5    | 75.56826822 | 0.588941576  | 0.203745687 | 2.89057199   | 0.003845414 | 0.022668603 |
| FGD5     | 1107.293405 | -0.183690223 | 0.063558959 | -2.890076001 | 0.003851487 | 0.02269722  |
| MCEE     | 39.67626843 | -0.462278224 | 0.160009603 | -2.889065502 | 0.003863886 | 0.022763088 |
| NSUN7    | 31.5327669  | 0.498054239  | 0.172415367 | 2.888688214  | 0.003868524 | 0.022783212 |
| MANEA    | 229.269517  | -0.262636189 | 0.090923473 | -2.888541103 | 0.003870334 | 0.02278667  |
| RTF1     | 1724.071875 | 0.187765657  | 0.065014299 | 2.888067098  | 0.003876172 | 0.02281383  |
| CD276    | 448.6379768 | 0.460348326  | 0.159476432 | 2.88662293   | 0.003894006 | 0.022905188 |
| HSF2     | 28.86458251 | -0.606526975 | 0.210117315 | -2.8866111   | 0.003894152 | 0.022905188 |
| ANKFY1   | 649.4744091 | 0.228002716  | 0.078992296 | 2.886391808  | 0.003896867 | 0.022913922 |
| KIAA0513 | 1581.620524 | -0.263100457 | 0.091167902 | -2.885889138 | 0.003903096 | 0.02294331  |
| MRAS     | 1288.732213 | 0.265103468  | 0.091878727 | 2.88536287   | 0.003909627 | 0.022974455 |
| CACFD1   | 33.84590736 | -0.456304631 | 0.158174437 | -2.884819067 | 0.003916387 | 0.022999669 |
| NOXA1    | 27.20278696 | -0.560192913 | 0.194181221 | -2.884897464 | 0.003915412 | 0.022999669 |
| MAP3K10  | 99.13707752 | 0.368637446  | 0.127794083 | 2.884620617  | 0.003918856 | 0.02300692  |
| TREX1    | 45.69513084 | 0.493573993  | 0.171142963 | 2.88398649   | 0.003926756 | 0.023046038 |
| PPM1N    | 75.05138768 | 0.313322724  | 0.108667202 | 2.88332375   | 0.003935028 | 0.023087314 |
| ALKBH8   | 142.7694587 | 0.205319144  | 0.071238636 | 2.882131902  | 0.003949943 | 0.023160241 |
| MTERFD3  | 31.06433911 | -0.490624825 | 0.170225064 | -2.882212614 | 0.003948932 | 0.023160241 |
| EXOC5    | 816.1499466 | 0.30079365   | 0.104384529 | 2.881592264  | 0.003956714 | 0.02319264  |
| ST6GALNA | 574.7519936 | 0.269770734  | 0.093656543 | 2.880425923  | 0.003971383 | 0.023271303 |

|           |             |              |             |              |             |              |
|-----------|-------------|--------------|-------------|--------------|-------------|--------------|
| HMGXB3    | 386.1480504 | 0.210096675  | 0.072950489 | 2.879989931  | 0.003976879 | 0.023296183  |
| KIFC1     | 9.054734441 | 0.915299903  | 0.317849951 | 2.879660354  | 0.003981038 | 0.023313218  |
| DNAJC9    | 129.1283204 | -0.236776287 | 0.082262337 | -2.878307317 | 0.003998154 | 0.023406098  |
| ARF4      | 3851.951136 | 0.201874244  | 0.070155089 | 2.877542435  | 0.00400786  | 0.023455548  |
| UBXN1     | 1238.651514 | -0.214034398 | 0.074384435 | -2.877408413 | 0.004009563 | 0.023458146  |
| LUZP1     | 622.5324076 | 0.131391636  | 0.045666118 | 2.877223679  | 0.004011911 | 0.023464517  |
| VENTX     | 10.53735761 | -0.962292871 | 0.334465949 | -2.877102661 | 0.00401345  | 0.023466152  |
| LINC00032 | 5.735516099 | 1.143124308  | 0.39734721  | 2.876890234  | 0.004016153 | 0.023474589  |
| ATP6V0E2  | 43.49951637 | -0.488204482 | 0.169782209 | -2.875474902 | 0.004034202 | 0.023572695  |
| MYO1C     | 5.843888949 | 1.415383615  | 0.492287758 | 2.875114387  | 0.004038811 | 0.02359223   |
| SLC25A42  | 4.671929611 | -1.157746984 | 0.40284387  | -2.873934718 | 0.004053927 | 0.023673107  |
| ZNF620    | 10.19520418 | 0.564271964  | 0.196370519 | 2.873506499  | 0.004059427 | 0.023697797  |
| PAK6      | 7.573703962 | -1.04950686  | 0.365295181 | -2.873037792 | 0.004065455 | 0.023718123  |
| RRAS2     | 8.553445168 | 1.331112902  | 0.463299335 | 2.873116368  | 0.004064444 | 0.023718123  |
| PMS2      | 45.31270364 | -0.772169141 | 0.268808979 | -2.872557098 | 0.004071645 | 0.023746802  |
| DDB1      | 3288.183355 | -0.13659545  | 0.047580575 | -2.870823866 | 0.004094036 | 0.023869919  |
| RNASET2   | 2816.12393  | -0.219103634 | 0.076340532 | -2.87008262  | 0.004103646 | 0.023918465  |
| SAYSD1    | 111.0040572 | -0.290031934 | 0.101066023 | -2.869727376 | 0.004108258 | 0.023937863  |
| CYP4V2    | 568.1624155 | -0.203365922 | 0.070876132 | -2.869314622 | 0.004113624 | 0.023939184  |
| DCTN6     | 786.6345168 | 0.223774023  | 0.077986553 | 2.86939241   | 0.004112612 | 0.023939184  |
| DUSP7     | 790.8544161 | 0.294276974  | 0.102553216 | 2.869505084  | 0.004111147 | 0.023939184  |
| IL15      | 34.06358903 | 0.49932144   | 0.174012213 | 2.869462044  | 0.004111707 | 0.023939184  |
| SIKE1     | 149.1043304 | 0.299438294  | 0.104399221 | 2.868204293  | 0.004128089 | 0.024015863  |
| TRIM4     | 177.3919199 | -0.251142077 | 0.087586023 | -2.867376177 | 0.004138907 | 0.024071285  |
| NKG7      | 47.35364629 | 0.623806144  | 0.217667713 | 2.865864372  | 0.004158724 | 0.024178989  |
| DNAJC17   | 43.07978991 | -0.428661377 | 0.149668144 | -2.864078919 | 0.004182238 | 0.024308117  |
| SAMD4A    | 221.9124092 | -0.351638933 | 0.122853376 | -2.862265129 | 0.004206249 | 0.02444005   |
| VLDLR     | 40.086147   | -0.627308076 | 0.219180837 | -2.86205713  | 0.00420901  | 0.0244448472 |
| RGS2      | 24.42319844 | -0.753641082 | 0.263406322 | -2.861135133 | 0.004221271 | 0.024512048  |
| GIMAP7    | 24.33316778 | -0.949534655 | 0.332113399 | -2.859067591 | 0.004248882 | 0.024664696  |
| CDK1      | 11.54510461 | 1.078784272  | 0.377412662 | 2.858367992  | 0.004258262 | 0.024711449  |
| HMGN4     | 194.5566297 | -0.175280652 | 0.061326822 | -2.858140134 | 0.004261322 | 0.024713808  |
| MORC3     | 932.7588285 | 0.23663766   | 0.082791861 | 2.858223703  | 0.004260199 | 0.024713808  |
| SLC26A2   | 76.36014218 | -0.240103196 | 0.084022168 | -2.857617239 | 0.004268349 | 0.024746864  |
| RHOQ      | 1393.272652 | 0.283047809  | 0.099080427 | 2.856747972  | 0.004280055 | 0.024799301  |
| UBE2Q2    | 150.2907753 | -0.356346592 | 0.124734558 | -2.856839326 | 0.004278824 | 0.024799301  |
| EIF2AK3   | 310.2798114 | 0.315074987  | 0.110299001 | 2.856553399  | 0.00428268  | 0.024806792  |
| KIAA1522  | 382.8041423 | 0.318843404  | 0.111626659 | 2.85633742   | 0.004285594 | 0.024815961  |
| ACTL6A    | 72.55335242 | -0.451783197 | 0.15818703  | -2.856006575 | 0.004290063 | 0.024834118  |
| SLC16A10  | 191.9357504 | 0.403379356  | 0.141245594 | 2.855872138  | 0.004291879 | 0.024836919  |
| TET3      | 140.7725686 | -0.411678986 | 0.144172897 | -2.855453385 | 0.004297543 | 0.024861974  |
| TSEN15    | 64.49280582 | -0.348713197 | 0.12220072  | -2.853609996 | 0.004322556 | 0.024998917  |
| PTPLAD1   | 338.4295079 | -0.21607177  | 0.075744252 | -2.852649069 | 0.004335647 | 0.025066848  |
| CCNB1IP1  | 76.81043616 | -0.353188333 | 0.123817682 | -2.852487038 | 0.004337858 | 0.025071851  |
| RNF20     | 464.3847664 | -0.147348218 | 0.051662162 | -2.852149645 | 0.004342465 | 0.025090697  |
| HLA-DPB1  | 11013.53389 | -0.242140429 | 0.085027663 | -2.847784125 | 0.004402478 | 0.025429562  |
| CCDC36    | 2.466913198 | -1.744986527 | 0.61280707  | -2.847530016 | 0.004405994 | 0.025441986  |
| FKBP1AP1  | 9.501396867 | 1.048584871  | 0.368305527 | 2.847051683  | 0.00441262  | 0.025472353  |
| SPOPL     | 213.8241093 | -0.403571017 | 0.141794396 | -2.846170422 | 0.004424851 | 0.025535047  |

|          |             |              |             |              |             |             |
|----------|-------------|--------------|-------------|--------------|-------------|-------------|
| RPS25    | 4301.435436 | -0.4238922   | 0.1489902   | -2.845101214 | 0.004439731 | 0.025612989 |
| HOPX     | 9.855197189 | 1.119788751  | 0.393662329 | 2.844541294  | 0.004447542 | 0.025650108 |
| KLHDC8B  | 1038.308057 | -0.314783182 | 0.11068547  | -2.84394312  | 0.0044559   | 0.02569036  |
| TREML4   | 21.36365012 | 1.304752189  | 0.45887508  | 2.843371204  | 0.004463905 | 0.025728549 |
| FAM83H   | 78.72128618 | 0.348535909  | 0.122599719 | 2.842876888  | 0.004470834 | 0.025760518 |
| MAFF     | 24.83734459 | 0.923482882  | 0.324854183 | 2.842761242  | 0.004472456 | 0.0257619   |
| IER5L    | 63.40501704 | -0.448813236 | 0.157891088 | -2.842549519 | 0.004475428 | 0.025771051 |
| FBN2     | 8.445875424 | -1.352758867 | 0.476056176 | -2.841595039 | 0.004488847 | 0.025840338 |
| ERCC6    | 44.14338096 | -0.37867678  | 0.133284861 | -2.841108717 | 0.004495698 | 0.025867057 |
| KIAA0825 | 11.00160212 | -0.820081032 | 0.288652322 | -2.841068539 | 0.004496265 | 0.025867057 |
| H2AFX    | 236.7206503 | 0.341788095  | 0.12030911  | 2.84091616   | 0.004498414 | 0.025871432 |
| ZNF850   | 20.28939043 | -0.556665858 | 0.196003595 | -2.840079831 | 0.004510225 | 0.025931356 |
| FAM126B  | 262.3496785 | 0.606222718  | 0.213463342 | 2.839938284  | 0.004512226 | 0.025934863 |
| FAU      | 2268.645416 | -0.214917394 | 0.075707914 | -2.838770519 | 0.004528771 | 0.026021932 |
| TTC7B    | 911.6379466 | 0.209800845  | 0.073911112 | 2.838556189  | 0.004531814 | 0.026031388 |
| SLC39A12 | 5.755623495 | 1.219139472  | 0.42953049  | 2.838307173  | 0.004535351 | 0.026043678 |
| P4HA2    | 282.6392338 | 0.237809515  | 0.083817552 | 2.837228112  | 0.004550709 | 0.026123816 |
| QARS     | 752.7053812 | -0.338869918 | 0.119469034 | -2.836466533 | 0.004561576 | 0.026178135 |
| XPR1     | 280.3750814 | 0.236386546  | 0.083358289 | 2.835789322  | 0.004571259 | 0.026225628 |
| ERCC8    | 68.46647147 | -0.381779045 | 0.134667843 | -2.834968142 | 0.004583026 | 0.026285041 |
| ACAP3    | 93.22294266 | -0.267005124 | 0.094200243 | -2.834441982 | 0.004590579 | 0.026312167 |
| TMEM164  | 422.9622112 | 0.290000074  | 0.10230965  | 2.834532951  | 0.004589272 | 0.026312167 |
| ACOT8    | 168.4909326 | -0.291257776 | 0.102778362 | -2.833843347 | 0.004599187 | 0.026353399 |
| ZC3H3    | 134.9089106 | 0.284730033  | 0.100548704 | 2.831762337  | 0.004629224 | 0.026517358 |
| MRPS18A  | 389.9006364 | 0.203887128  | 0.072118157 | 2.827126162  | 0.004696782 | 0.026896077 |
| CSNK1A1  | 2978.075069 | 0.293195048  | 0.103727721 | 2.826583327  | 0.00470475  | 0.02693343  |
| DHFR     | 287.4330165 | -0.259331562 | 0.091780031 | -2.825577178 | 0.004719552 | 0.027009867 |
| SRCIN1   | 44.00656923 | -0.428904981 | 0.151799387 | -2.825472426 | 0.004721095 | 0.027010404 |
| TAF1D    | 518.7833093 | -0.239468836 | 0.084759867 | -2.825262066 | 0.004724196 | 0.027019849 |
| ATG7     | 476.3917758 | -0.206475989 | 0.073090044 | -2.824953664 | 0.004728745 | 0.027035453 |
| MBNL2    | 999.1020326 | -0.239596197 | 0.084816402 | -2.824880456 | 0.004729826 | 0.027035453 |
| SGSM3    | 352.4104148 | -0.311190762 | 0.1102292   | -2.823124562 | 0.004755809 | 0.027175635 |
| TMC6     | 546.7356007 | -0.195850859 | 0.069395646 | -2.82223554  | 0.004769014 | 0.027242735 |
| GIN53    | 15.32156542 | 0.584787769  | 0.20726456  | 2.82145568   | 0.004780624 | 0.02730069  |
| SLC15A2  | 7.422877681 | -1.076801065 | 0.381717487 | -2.820937219 | 0.004788357 | 0.027336474 |
| PABPC4   | 2331.205334 | -0.349588602 | 0.123990158 | -2.8194867   | 0.004810052 | 0.027451919 |
| EVI2B    | 1168.708846 | -0.323697405 | 0.114818665 | -2.819205433 | 0.00481427  | 0.027467575 |
| FIGNL1   | 57.20155464 | 0.386563969  | 0.137133645 | 2.818884957  | 0.004819079 | 0.027486597 |
| EEF1E1   | 349.725394  | 0.210565805  | 0.074719257 | 2.818092868  | 0.004830983 | 0.027539483 |
| LSAMP    | 171.2585552 | -0.408389227 | 0.144917985 | -2.818071387 | 0.004831307 | 0.027539483 |
| NET1     | 36.27335961 | -0.527738269 | 0.187457218 | -2.81524645  | 0.004873984 | 0.027774257 |
| TIGD1    | 62.15742748 | -0.358404898 | 0.12734633  | -2.814410886 | 0.004886672 | 0.027838048 |
| ITPKB    | 384.6837616 | -0.345199371 | 0.122718567 | -2.812935159 | 0.004909155 | 0.027957577 |
| LOC22072 | 139.5418008 | -0.246959105 | 0.087827656 | -2.811860356 | 0.004925588 | 0.028042594 |
| NRBP2    | 90.35730669 | -0.298435021 | 0.106183817 | -2.810550889 | 0.004945677 | 0.028147128 |
| SLC25A51 | 215.0762103 | -0.279627624 | 0.099495084 | -2.810466736 | 0.00494697  | 0.028147128 |
| KRTCAP2  | 1186.191312 | -0.134817494 | 0.047973011 | -2.810277947 | 0.004949873 | 0.028155048 |
| DFNB31   | 10.65057031 | 0.817507524  | 0.29098345  | 2.809463984  | 0.004962407 | 0.028217728 |
| SCN8A    | 4.542005399 | 1.529805806  | 0.54455578  | 2.809272917  | 0.004965353 | 0.028225868 |

|           |             |              |             |              |             |             |
|-----------|-------------|--------------|-------------|--------------|-------------|-------------|
| ARHGAP26  | 15.56100435 | -0.822008259 | 0.292637188 | -2.808967186 | 0.004970071 | 0.028239933 |
| C1orf85   | 1632.702046 | -0.257997363 | 0.091855852 | -2.808719922 | 0.00497389  | 0.028239933 |
| KIAA1755  | 3.62123196  | 2.018713966  | 0.718706583 | 2.808815189  | 0.004972418 | 0.028239933 |
| PITPNA-AS | 16.30628239 | -0.572213807 | 0.203723884 | -2.808771348 | 0.004973095 | 0.028239933 |
| ZAK       | 275.0402931 | -0.310622561 | 0.110607686 | -2.808327085 | 0.004979962 | 0.028265796 |
| ITFG3     | 329.6315122 | -0.206908407 | 0.073695845 | -2.807599378 | 0.004991228 | 0.028321114 |
| LOC38964  | 39.99867152 | 0.431665226  | 0.153806455 | 2.806548178  | 0.005007542 | 0.028405036 |
| BNIP3L    | 1670.323107 | -0.286537028 | 0.10211607  | -2.805993506 | 0.00501617  | 0.028445319 |
| EHMT2     | 236.1635596 | -0.209973617 | 0.074858992 | -2.804921773 | 0.005032879 | 0.028531388 |
| CASP2     | 337.1898623 | -0.16720685  | 0.059615879 | -2.804736787 | 0.005035768 | 0.028539084 |
| C14orf166 | 923.1456007 | -0.225293003 | 0.080333487 | -2.804471848 | 0.005039909 | 0.028553865 |
| TAS1R3    | 3.404898841 | -1.233180247 | 0.43998807  | -2.802758373 | 0.005066761 | 0.028697274 |
| CDCA2     | 1.989017313 | 1.937971794  | 0.691932273 | 2.800811395  | 0.00509743  | 0.028853437 |
| TMEM67    | 28.03547837 | 0.324525905  | 0.115866881 | 2.800851303  | 0.0050968   | 0.028853437 |
| CTSD      | 127278.683  | -0.302075738 | 0.107892796 | -2.799776718 | 0.005113797 | 0.028937286 |
| C7orf69   | 4.251450077 | 1.55003481   | 0.553688076 | 2.799472984  | 0.00511861  | 0.028955731 |
| SFXN4     | 218.1587254 | 0.210663343  | 0.075255605 | 2.799304381  | 0.005121284 | 0.028962064 |
| PQLC2     | 856.2624233 | 0.225669359  | 0.080643344 | 2.798363092  | 0.005136234 | 0.029037798 |
| DISC1     | 58.82793006 | -0.395444728 | 0.141321148 | -2.798199243 | 0.00513884  | 0.029043721 |
| DPY30     | 610.0081968 | -0.236387142 | 0.084495512 | -2.797629576 | 0.005147911 | 0.029086168 |
| PTBP1     | 2554.562039 | 0.301005522  | 0.107603567 | 2.797356367  | 0.005152267 | 0.029086857 |
| RPS6KA4   | 457.9882426 | -0.332337719 | 0.118800469 | -2.797444507 | 0.005150861 | 0.029086857 |
| TRPM7     | 508.3252684 | -0.212868727 | 0.076097158 | -2.797328199 | 0.005152716 | 0.029086857 |
| DOCK3     | 154.981667  | 0.436853336  | 0.156176784 | 2.797172061  | 0.005155207 | 0.029092105 |
| TSPAN32   | 21.60834281 | -0.683645411 | 0.244430442 | -2.796891437 | 0.005159687 | 0.029108569 |
| ARPC2     | 20318.47171 | 0.185833488  | 0.066461067 | 2.796125572  | 0.00517193  | 0.029168809 |
| HSPE1     | 1190.401449 | -0.188249395 | 0.06733163  | -2.795853825 | 0.005176281 | 0.029184512 |
| CPQ       | 464.7047979 | -0.225662351 | 0.080730091 | -2.795269376 | 0.005185649 | 0.029228486 |
| FBP1      | 3755.108325 | 0.356196324  | 0.127534845 | 2.792933373  | 0.005223245 | 0.029430394 |
| MTHFD1L   | 131.6778193 | -0.479468088 | 0.171677137 | -2.792847642 | 0.005224629 | 0.029430394 |
| ATHL1     | 36.79178611 | -0.457791311 | 0.163957289 | -2.792137598 | 0.005236108 | 0.029486142 |
| HNMT      | 1851.478218 | -0.225606802 | 0.080810557 | -2.791798623 | 0.005241597 | 0.02950813  |
| PLAA      | 382.5060446 | 0.25420389   | 0.091068006 | 2.791363287  | 0.005248653 | 0.029538928 |
| GUSBP11   | 83.12021363 | -0.307997161 | 0.110346234 | -2.791188685 | 0.005251485 | 0.029545945 |
| SRD5A1    | 102.4110497 | 0.317561308  | 0.11378242  | 2.790952321  | 0.005255321 | 0.029558605 |
| PON2      | 74.6136575  | -0.612839823 | 0.219681869 | -2.789669565 | 0.005276186 | 0.029667004 |
| POP1      | 25.03706143 | 0.480081505  | 0.172107185 | 2.789433247  | 0.005280038 | 0.029679707 |
| TMED1     | 349.5985926 | 0.376546403  | 0.135034635 | 2.788517209  | 0.005294993 | 0.029754797 |
| ALDH5A1   | 76.65384975 | -0.44308088  | 0.15894087  | -2.787708908 | 0.005308222 | 0.02982014  |
| ARL8B     | 6657.36751  | 0.22333572   | 0.080132354 | 2.787085489  | 0.005318445 | 0.029868565 |
| KIAA0930  | 3960.715491 | -0.20940252  | 0.075140148 | -2.786826039 | 0.005322704 | 0.029883481 |
| TSHZ1     | 22.59136059 | -0.492399102 | 0.17676283  | -2.785648437 | 0.005342077 | 0.029983214 |
| POLR2A    | 1936.552199 | 0.250595723  | 0.089973893 | 2.785204867  | 0.005349391 | 0.030015224 |
| NAA40     | 130.7167352 | -0.325346326 | 0.116832376 | -2.784727477 | 0.005357273 | 0.030050398 |
| ADI1      | 684.9619572 | -0.272821497 | 0.098010274 | -2.783600988 | 0.005375912 | 0.030145878 |
| ELOVL6    | 8.901181462 | 0.759593718  | 0.272906615 | 2.78334667   | 0.005380129 | 0.030160444 |
| LOC92249  | 63.67434299 | -0.466005567 | 0.167439168 | -2.783133559 | 0.005383664 | 0.030171186 |
| ATP9B     | 624.5248038 | 0.137267067  | 0.049376085 | 2.780031385  | 0.005435365 | 0.030445809 |
| SYNM      | 12.41601227 | 0.830935579  | 0.298897979 | 2.77999732   | 0.005435935 | 0.030445809 |

|           |             |              |             |              |             |             |
|-----------|-------------|--------------|-------------|--------------|-------------|-------------|
| ENTPD7    | 259.7430587 | 0.363579265  | 0.130891062 | 2.77772416   | 0.005474107 | 0.030650392 |
| TRIB2     | 93.43159265 | 0.384511436  | 0.138445347 | 2.777351823  | 0.005480382 | 0.030676312 |
| RARA      | 153.6724178 | -0.547585283 | 0.19718061  | -2.777074701 | 0.005485057 | 0.03069326  |
| TBL2      | 473.7058605 | -0.186857026 | 0.067324315 | -2.775476064 | 0.005512096 | 0.030835302 |
| MTCH2     | 977.5714264 | -0.161730262 | 0.058275005 | -2.775293839 | 0.005515185 | 0.030843326 |
| KAT5      | 580.3743502 | 0.204577784  | 0.07373909  | 2.774346456  | 0.005531274 | 0.030924019 |
| ANKRD24   | 11.11664547 | 0.772142905  | 0.278329254 | 2.774206786  | 0.005533649 | 0.03092802  |
| GTF3C5    | 197.7607088 | -0.288756806 | 0.104161947 | -2.772190936 | 0.005568037 | 0.031109633 |
| TMEM140   | 640.249201  | 0.515922734  | 0.186112167 | 2.772106421  | 0.005569482 | 0.031109633 |
| HDAC10    | 330.590529  | -0.235307067 | 0.084887879 | -2.771974869 | 0.005571734 | 0.031112882 |
| MICU1     | 1023.014828 | 0.144875646  | 0.052270959 | 2.771627873  | 0.005577676 | 0.031136733 |
| DAAM1     | 181.9058822 | 0.256067647  | 0.092450018 | 2.769795541  | 0.005609149 | 0.03130305  |
| NEK6      | 119.9738741 | 0.385558756  | 0.139288147 | 2.768065806  | 0.005639007 | 0.031441428 |
| TECPR2    | 179.974372  | 0.331206608  | 0.119651338 | 2.768097834  | 0.005638453 | 0.031441428 |
| ZBED2     | 6.495766511 | 2.584633743  | 0.93373128  | 2.768070213  | 0.005638931 | 0.031441428 |
| FAM186B   | 4.738271546 | 1.171908112  | 0.423391307 | 2.767907828  | 0.005641741 | 0.031447263 |
| NUS1      | 1716.259062 | 0.356844992  | 0.128929083 | 2.767761795  | 0.005644269 | 0.031451948 |
| GTDC1     | 247.8840128 | -0.28572886  | 0.103299731 | -2.76601747  | 0.005674549 | 0.031599613 |
| NETO2     | 314.9421263 | 0.252489549  | 0.09128518  | 2.765942386  | 0.005675856 | 0.031599613 |
| PSMB5     | 476.391923  | 0.248716941  | 0.089917674 | 2.766051775  | 0.005673953 | 0.031599613 |
| TSC2      | 530.9814258 | -0.220402822 | 0.079687744 | -2.765830874 | 0.005677797 | 0.031600978 |
| TAOK2     | 385.4742902 | -0.245756589 | 0.088859841 | -2.765665404 | 0.005680679 | 0.031607575 |
| AMOTL1    | 275.909851  | -0.264902127 | 0.095797129 | -2.765240783 | 0.005688079 | 0.031639304 |
| ENTPD5    | 188.6508432 | 0.263993417  | 0.095515566 | 2.763878474  | 0.005711881 | 0.031761783 |
| TRIP10    | 308.9189729 | 0.436609156  | 0.157975047 | 2.763785567  | 0.005713507 | 0.031761783 |
| KRBA1     | 21.52667036 | -0.476411824 | 0.1723959   | -2.763475367 | 0.005718941 | 0.031782507 |
| HERC1     | 401.9159211 | -0.272227577 | 0.098521647 | -2.763124494 | 0.005725093 | 0.031805602 |
| TRAP1     | 344.023372  | 0.173292074  | 0.062717819 | 2.763043673  | 0.00572651  | 0.031805602 |
| NCF2      | 11779.96189 | 0.214959407  | 0.077816926 | 2.762373405  | 0.005738281 | 0.03186148  |
| NISCH     | 205.5343461 | -0.326757572 | 0.118297467 | -2.762168794 | 0.005741879 | 0.031871958 |
| CCSAP     | 783.0014692 | -0.178558967 | 0.064649879 | -2.761938123 | 0.005745937 | 0.031884986 |
| FAM102A   | 55.9397287  | -0.454877638 | 0.164719215 | -2.761533539 | 0.005753061 | 0.031905516 |
| TERF1     | 26.52297316 | 0.56836385   | 0.205812501 | 2.761561362  | 0.005752571 | 0.031905516 |
| GOLGA5    | 626.3976952 | 0.19129707   | 0.069338881 | 2.758871599  | 0.005800132 | 0.032156995 |
| PORCN     | 118.5473869 | -0.418217266 | 0.151680923 | -2.757217316 | 0.005829559 | 0.032310532 |
| ACAD8     | 224.0064765 | -0.245802455 | 0.089152121 | -2.757112818 | 0.005831423 | 0.03231125  |
| LATS2     | 152.4560112 | 0.23738679   | 0.086107044 | 2.756880021  | 0.005835576 | 0.03232465  |
| PYCR1     | 5.479720525 | 0.966697871  | 0.350677065 | 2.756661233  | 0.005839482 | 0.032336671 |
| DLX4      | 6.217790029 | -1.093492195 | 0.3968851   | -2.755185812 | 0.005865881 | 0.032473212 |
| LRWD1     | 107.0368749 | 0.315511184  | 0.114581194 | 2.753603571  | 0.005894312 | 0.03262091  |
| GALNT14   | 7.1453559   | 1.589067732  | 0.577533263 | 2.751473956  | 0.005932774 | 0.032815079 |
| LOC729851 | 252.4155934 | -0.269325231 | 0.097884268 | -2.751465965 | 0.005932918 | 0.032815079 |
| ZNF702P   | 98.42276    | 0.493063372  | 0.179248254 | 2.750729014  | 0.005946281 | 0.032879229 |
| TTYH2     | 461.479088  | 0.304965255  | 0.110873338 | 2.750573395  | 0.005949106 | 0.032885092 |
| BDH1      | 123.9647373 | 0.288864695  | 0.105040359 | 2.750035296  | 0.005958885 | 0.032929376 |
| LOC389634 | 6.49420314  | 1.282131677  | 0.46628436  | 2.749677639  | 0.005965392 | 0.032955563 |
| LIPT1     | 9.758227376 | -0.747985776 | 0.272060454 | -2.749336649 | 0.005971602 | 0.032980092 |
| KLHDC2    | 338.536439  | -0.244465029 | 0.088928825 | -2.748996508 | 0.005977802 | 0.033004554 |
| ELP4      | 80.49714998 | -0.286652843 | 0.104295143 | -2.748477394 | 0.005987276 | 0.03304707  |

|           |             |              |             |              |             |             |
|-----------|-------------|--------------|-------------|--------------|-------------|-------------|
| C1QB      | 26069.03887 | 0.270843618  | 0.098547277 | 2.748362275  | 0.005989379 | 0.033048887 |
| HP        | 26.45930642 | -1.291867525 | 0.470139481 | -2.747838838 | 0.005998949 | 0.033091892 |
| NCAPD3    | 135.765087  | -0.237882188 | 0.086584507 | -2.747399    | 0.006007001 | 0.033119335 |
| PRPS1     | 378.2709755 | -0.199101941 | 0.072469937 | -2.747372922 | 0.006007478 | 0.033119335 |
| DESI2     | 140.6139113 | -0.351951435 | 0.128143079 | -2.746550469 | 0.006022562 | 0.03319267  |
| COG2      | 226.0968551 | -0.188748071 | 0.06872684  | -2.746351643 | 0.006026213 | 0.033202975 |
| LOC64285: | 27.45944083 | -0.343219616 | 0.124990269 | -2.745970687 | 0.006033215 | 0.033231728 |
| MFAP1     | 622.4849843 | 0.190599322  | 0.069413796 | 2.745842074  | 0.006035581 | 0.033234934 |
| LAYN      | 7.647061493 | 0.854243864  | 0.311186519 | 2.745118479  | 0.006048906 | 0.033298465 |
| ASAH1     | 16399.57393 | -0.262172514 | 0.095521175 | -2.744653367 | 0.006057484 | 0.033335842 |
| SF3B14    | 315.2477657 | -0.137929604 | 0.050269253 | -2.743816469 | 0.006072948 | 0.033411076 |
| ZNF417    | 81.59087421 | -0.295323827 | 0.107639304 | -2.743643047 | 0.006076157 | 0.033418863 |
| CYB5A     | 1130.214399 | 0.248016193  | 0.090421108 | 2.742901495  | 0.006089895 | 0.03348454  |
| MAD2L1BF  | 316.9476813 | 0.294995225  | 0.107565866 | 2.742461304  | 0.006098063 | 0.033519562 |
| NAGA      | 1441.567481 | -0.218989404 | 0.079857062 | -2.742267227 | 0.006101668 | 0.033529484 |
| ARPC4     | 2272.247903 | -0.155938665 | 0.05687476  | -2.741790297 | 0.006110534 | 0.033556604 |
| MOCOS     | 44.11792787 | 0.388320138  | 0.141639224 | 2.741614409  | 0.006113807 | 0.033556604 |
| NANOG     | 125.4926879 | -0.460926764 | 0.168122196 | -2.741617555 | 0.006113748 | 0.033556604 |
| ZNF93     | 67.37117866 | -0.400742505 | 0.146155126 | -2.741898391 | 0.006108523 | 0.033556604 |
| ABCA7     | 21.46198487 | -0.661424288 | 0.241275262 | -2.741368023 | 0.006118393 | 0.033571892 |
| PTER      | 87.94324671 | -0.27091304  | 0.098845579 | -2.740770432 | 0.006129532 | 0.033623107 |
| CMTM8     | 11.07288267 | -0.711756015 | 0.259786022 | -2.739777956 | 0.00614807  | 0.033704956 |
| EEFSEC    | 111.3514952 | -0.22152387  | 0.080854385 | -2.739787952 | 0.006147883 | 0.033704956 |
| RGMB      | 38.62120945 | -0.41349178  | 0.150961186 | -2.739060227 | 0.006161509 | 0.033762578 |
| SH3PXD2A  | 164.0595326 | -0.568106904 | 0.207412238 | -2.739023068 | 0.006162205 | 0.033762578 |
| CEBPE     | 12.88105079 | -0.73968414  | 0.270103591 | -2.738520199 | 0.006171637 | 0.033804316 |
| KIAA0391  | 299.5046507 | -0.235446392 | 0.085984141 | -2.738253702 | 0.006176641 | 0.033821781 |
| TRIM37    | 87.40730243 | -0.337997905 | 0.123466224 | -2.737573849 | 0.006189422 | 0.033881813 |
| AK1       | 398.6440279 | 0.265426177  | 0.097025767 | 2.735625643  | 0.006226181 | 0.034063024 |
| NAF1      | 218.4057458 | 0.400281154  | 0.14632082  | 2.735640446  | 0.006225901 | 0.034063024 |
| CXorf26   | 809.3346194 | 0.187798208  | 0.068652403 | 2.735493593  | 0.00622868  | 0.034066692 |
| LOC40132: | 35.43114217 | -0.604507    | 0.221027386 | -2.734986876 | 0.006238276 | 0.034109167 |
| RCL1      | 110.8181706 | -0.309582529 | 0.113201703 | -2.734786868 | 0.006242068 | 0.034119886 |
| PMP22     | 417.433758  | -0.3115002   | 0.113907429 | -2.734678523 | 0.006244123 | 0.034121108 |
| KDM4B     | 207.6082679 | -0.388788221 | 0.142211608 | -2.733871217 | 0.006259452 | 0.034184827 |
| STAU2     | 267.4281166 | -0.192077997 | 0.070258524 | -2.73387464  | 0.006259387 | 0.034184827 |
| STOML1    | 25.25348417 | 0.537365982  | 0.196602768 | 2.733257464  | 0.006271129 | 0.034238564 |
| TAMM41    | 114.186219  | -0.260063822 | 0.095157265 | -2.732989663 | 0.00627623  | 0.034256378 |
| ANXA11    | 3944.809434 | 0.217789682  | 0.079817007 | 2.728612493  | 0.006360139 | 0.034704198 |
| ARSK      | 52.4973803  | -0.418763174 | 0.153511742 | -2.727890181 | 0.006374082 | 0.034759922 |
| RPL23AP8: | 247.0286714 | -0.45058454  | 0.165173917 | -2.727940035 | 0.006373119 | 0.034759922 |
| ACTN1     | 6522.073951 | 0.37728808   | 0.138387862 | 2.726309049  | 0.0064047   | 0.034906457 |
| SMYD3     | 36.56679912 | -0.537825913 | 0.19727186  | -2.726318453 | 0.006404517 | 0.034906457 |
| EFR3B     | 20.81338094 | 0.783732004  | 0.287500026 | 2.726024111  | 0.006410232 | 0.03492639  |
| ALDH4A1   | 44.0122839  | -0.425851464 | 0.156251597 | -2.725421507 | 0.006421944 | 0.034969758 |
| TMBIM4    | 1544.304784 | -0.120193736 | 0.044100247 | -2.725466274 | 0.006421074 | 0.034969758 |
| TMEM218   | 3.773736637 | -1.161619501 | 0.426396597 | -2.724270103 | 0.006444378 | 0.035081664 |
| HELB      | 45.41435495 | 0.430834371  | 0.15819787  | 2.723389209  | 0.006461588 | 0.035154814 |
| NEDD4L    | 108.8886692 | 0.425081446  | 0.156083691 | 2.723419996  | 0.006460986 | 0.035154814 |

|           |             |              |             |              |             |             |
|-----------|-------------|--------------|-------------|--------------|-------------|-------------|
| UBB       | 25367.19625 | 0.205863629  | 0.075609552 | 2.722719851  | 0.006474694 | 0.035215833 |
| LGALS8    | 842.90194   | 0.157310758  | 0.057812137 | 2.721068031  | 0.006507137 | 0.035381963 |
| RPL36AL   | 1182.816773 | -0.34305643  | 0.126107032 | -2.720359241 | 0.006521103 | 0.035447558 |
| EED       | 405.3282261 | 0.187044451  | 0.068772529 | 2.719755303  | 0.006533024 | 0.035502004 |
| AVIL      | 16.05000425 | 0.632760677  | 0.232691265 | 2.719314264  | 0.006541742 | 0.035539016 |
| AP4E1     | 140.1802087 | 0.316309597  | 0.116350311 | 2.718596923  | 0.006555945 | 0.035605791 |
| EPAS1     | 1363.866595 | -0.28207871  | 0.10377353  | -2.718214463 | 0.006563528 | 0.035636591 |
| FAM54B    | 434.8586772 | -0.215698528 | 0.079374845 | -2.717467078 | 0.00657837  | 0.035706771 |
| MAX       | 357.0981662 | 0.353676335  | 0.130158017 | 2.71728428   | 0.006582005 | 0.035716096 |
| VSIG10    | 39.26907227 | -0.468315858 | 0.172389526 | -2.716614338 | 0.006595341 | 0.035778045 |
| SH3BP1    | 1489.781215 | 0.231913912  | 0.085417004 | 2.715078962  | 0.006625997 | 0.035928116 |
| TRIM65    | 296.418249  | -0.182390503 | 0.067177938 | -2.715035762 | 0.006626861 | 0.035928116 |
| POLE3     | 380.7219099 | -0.279370099 | 0.10290323  | -2.714881712 | 0.006629945 | 0.035934377 |
| STIM1     | 670.0488113 | -0.289396103 | 0.106632352 | -2.713961551 | 0.006648388 | 0.036023863 |
| HIST1H2BT | 87.02442853 | -0.554302452 | 0.204253833 | -2.713792172 | 0.006651788 | 0.036031809 |
| GK3P      | 6.072383555 | 0.859606974  | 0.317108429 | 2.710766714  | 0.006712784 | 0.036351645 |
| KIF1C     | 1270.634169 | -0.245031303 | 0.090413391 | -2.710121812 | 0.00672585  | 0.036411822 |
| STAM      | 235.1863663 | -0.330759937 | 0.122062991 | -2.709747917 | 0.006733436 | 0.036442303 |
| TOB1-AS1  | 4.492676844 | -1.027736633 | 0.379432878 | -2.70861249  | 0.00675652  | 0.03655662  |
| CTSL2     | 12.03952572 | 0.720204359  | 0.265975931 | 2.7077802    | 0.006773487 | 0.036633026 |
| TRAPPC9   | 473.3227681 | -0.147012215 | 0.05429359  | -2.707726931 | 0.006774574 | 0.036633026 |
| DUSP28    | 28.53440174 | -0.460475666 | 0.170092763 | -2.707203157 | 0.006785272 | 0.036680232 |
| HSPA1A    | 6876.624627 | 0.267779457  | 0.098926258 | 2.70685926   | 0.006792305 | 0.036699847 |
| WDR35     | 54.18799765 | -0.35466217  | 0.131024764 | -2.706833114 | 0.00679284  | 0.036699847 |
| TRAPPC6A  | 161.2505676 | -0.385589295 | 0.142489781 | -2.706083851 | 0.006808185 | 0.036772094 |
| RUNX1     | 124.6442909 | 0.52505081   | 0.19407616  | 2.705385394  | 0.006822519 | 0.036838832 |
| OR2A20P   | 614.6824572 | 0.474735375  | 0.175509488 | 2.704898633  | 0.006832524 | 0.036882168 |
| LAMC1     | 304.532574  | 0.296590986  | 0.10971218  | 2.703355135  | 0.006864336 | 0.037032438 |
| TLN1      | 3360.384771 | -0.205191086 | 0.075900515 | -2.703421516 | 0.006862965 | 0.037032438 |
| ATP11B    | 859.1335306 | 0.185095997  | 0.068503749 | 2.701983466  | 0.006892719 | 0.037174798 |
| CIITA     | 1114.073906 | -0.332813196 | 0.123188916 | -2.701648872 | 0.006899658 | 0.037201457 |
| RNF144A   | 2.191552005 | 1.611213053  | 0.596456037 | 2.701310665  | 0.006906679 | 0.037228539 |
| HPCAL1    | 1695.940881 | -0.30032288  | 0.11119168  | -2.700947419 | 0.006914227 | 0.037258445 |
| ANP32AP1  | 8.264060591 | -1.003858737 | 0.371726378 | -2.700531347 | 0.006922881 | 0.037293028 |
| POR       | 1939.473457 | -0.186854622 | 0.069193973 | -2.700446501 | 0.006924647 | 0.037293028 |
| SNX8      | 1103.638677 | 0.176525761  | 0.065417213 | 2.698460431  | 0.006966102 | 0.037494611 |
| TMCO6     | 59.21118838 | -0.290609702 | 0.107693126 | -2.698498159 | 0.006965312 | 0.037494611 |
| CES2      | 330.3520102 | -0.147106191 | 0.054540176 | -2.697207839 | 0.006992361 | 0.037621635 |
| NPTX2     | 4.211647252 | 2.330506085  | 0.864064963 | 2.69714221   | 0.00699374  | 0.037621635 |
| ARSB      | 922.5941955 | 0.184805243  | 0.068555458 | 2.695704305  | 0.007023999 | 0.037762607 |
| CHST13    | 2.396510618 | -1.556734732 | 0.577485458 | -2.695712437 | 0.007023827 | 0.037762607 |
| CERS5     | 261.6505061 | 0.252434796  | 0.093659573 | 2.695237529  | 0.007033847 | 0.037793744 |
| PLCG1     | 112.3514541 | -0.38329479  | 0.142211789 | -2.695239202 | 0.007033812 | 0.037793744 |
| ZNF438    | 267.5182874 | 0.155820487  | 0.057822489 | 2.694807683  | 0.007042927 | 0.037831622 |
| SYNC      | 57.25787058 | 0.549673907  | 0.204058291 | 2.693710238  | 0.007066157 | 0.037945464 |
| CD300LF   | 1104.497555 | 0.352838088  | 0.131014496 | 2.693122504  | 0.007078625 | 0.037994333 |
| PLK1S1    | 54.66076044 | -0.353400499 | 0.131224957 | -2.693089095 | 0.007079335 | 0.037994333 |
| CAMLG     | 379.8886597 | -0.234349554 | 0.087029834 | -2.692749642 | 0.007086546 | 0.038022084 |
| CENPP     | 65.8702047  | -0.328858492 | 0.122156059 | -2.692117719 | 0.007099988 | 0.03808324  |

|           |             |              |             |              |             |             |
|-----------|-------------|--------------|-------------|--------------|-------------|-------------|
| KLRB1     | 30.44407802 | -0.962451333 | 0.357558411 | -2.691731764 | 0.007108209 | 0.038116365 |
| C10orf12  | 371.3599204 | 0.252035934  | 0.093682038 | 2.690333588  | 0.007138063 | 0.038265437 |
| RBM22     | 430.5284301 | 0.17326106   | 0.064424163 | 2.689380095  | 0.007158486 | 0.038363884 |
| CSPP1     | 6.401843578 | -1.012783891 | 0.376694467 | -2.688608356 | 0.007175055 | 0.038441623 |
| TBRG4     | 368.2414028 | 0.180286757  | 0.067063583 | 2.688295907  | 0.007181772 | 0.038466555 |
| MDN1      | 164.517417  | -0.230783484 | 0.085874669 | -2.687445389 | 0.007200087 | 0.038553572 |
| DRAP1     | 1822.39264  | 0.298568407  | 0.111106503 | 2.687227103  | 0.007204795 | 0.038567695 |
| AHCY      | 563.5751355 | -0.274927362 | 0.102325611 | -2.686789353 | 0.007214243 | 0.038607183 |
| TFAP2E    | 30.42254011 | -0.328818722 | 0.122417381 | -2.686046037 | 0.007230313 | 0.038682069 |
| ENG       | 4385.574813 | -0.183555661 | 0.068356722 | -2.68526129  | 0.007247312 | 0.038754901 |
| LIMD1-AS1 | 4.990186406 | -1.004746295 | 0.374175743 | -2.685225626 | 0.007248086 | 0.038754901 |
| PRR3      | 75.31296333 | 0.274975288  | 0.10242249  | 2.684715903  | 0.007259148 | 0.038802916 |
| DHX34     | 215.6097088 | 0.370462992  | 0.138060318 | 2.68334159   | 0.00728905  | 0.038951578 |
| RAB8A     | 1963.399135 | 0.326237217  | 0.121588403 | 2.683127728  | 0.007293713 | 0.038965322 |
| GSTP1     | 7329.607052 | -0.289708427 | 0.108020287 | -2.681981643 | 0.007318748 | 0.03908786  |
| BRD2      | 1027.926504 | 0.173599541  | 0.064737363 | 2.681597359  | 0.007327159 | 0.039116269 |
| ERVK13-1  | 86.85302599 | -0.28957686  | 0.107992597 | -2.681451024 | 0.007330364 | 0.039116269 |
| TRERF1    | 118.1906013 | -0.311773459 | 0.116267718 | -2.681513525 | 0.007328995 | 0.039116269 |
| PTPN13    | 20.37222165 | -0.704104911 | 0.262649178 | -2.680780945 | 0.007345058 | 0.039183456 |
| NBPF14    | 217.0533598 | -0.23468451  | 0.087547056 | -2.680667075 | 0.007347558 | 0.039185572 |
| HIST1H1D  | 160.0932259 | -0.406891398 | 0.151837686 | -2.679778697 | 0.007367085 | 0.039278236 |
| ME1       | 489.0926661 | -0.47792957  | 0.178352896 | -2.679684934 | 0.007369148 | 0.039278236 |
| ADAMTSL4  | 1147.146205 | 0.302689469  | 0.112979943 | 2.6791434    | 0.007381078 | 0.039329813 |
| IMPDH2    | 305.5799527 | -0.266393808 | 0.09943577  | -2.679054105 | 0.007383046 | 0.039329813 |
| HERC2P2   | 285.4158547 | -0.242176977 | 0.090426177 | -2.678173341 | 0.00740249  | 0.039422119 |
| LOC65365  | 21.48893425 | 0.682902257  | 0.25511497  | 2.67684118   | 0.007431985 | 0.039567891 |
| F11R      | 4530.064976 | -0.126690648 | 0.047347035 | -2.675788442 | 0.007455369 | 0.039681047 |
| FAM98C    | 95.41450427 | -0.352497304 | 0.131759658 | -2.675305243 | 0.007466124 | 0.039726942 |
| PDK2      | 226.5691331 | -0.24170581  | 0.09036895  | -2.674655527 | 0.007480607 | 0.039792644 |
| AGGF1     | 280.6582415 | -0.216669278 | 0.081035001 | -2.67377399  | 0.007500298 | 0.039886003 |
| LOXHD1    | 3.181727086 | 1.957492423  | 0.732203905 | 2.673425272  | 0.0075081   | 0.039916102 |
| C7orf49   | 105.787104  | -0.2853383   | 0.106737328 | -2.673275644 | 0.00751145  | 0.039922522 |
| TMEM158   | 98.04257101 | 0.517993333  | 0.193810997 | 2.672672555  | 0.007524966 | 0.039982954 |
| SLC4A1AP  | 311.0228868 | 0.237569653  | 0.088892931 | 2.672537055  | 0.007528006 | 0.039987703 |
| FAM210A   | 118.8202402 | 0.247863072  | 0.092751133 | 2.672345489  | 0.007532305 | 0.039987743 |
| HIST1H3D  | 71.91977935 | 0.449905533  | 0.168355501 | 2.672354216  | 0.007532109 | 0.039987743 |
| POLH      | 84.80708929 | -0.300053026 | 0.11228484  | -2.672248774 | 0.007534477 | 0.039987878 |
| SMCHD1    | 544.584341  | 0.255422223  | 0.095590018 | 2.672059583  | 0.007538726 | 0.039999038 |
| NAT9      | 141.135181  | -0.215251056 | 0.080564181 | -2.671796007 | 0.00754465  | 0.040019073 |
| KIAA0319  | 18.04445598 | 0.666496776  | 0.249508391 | 2.671239925  | 0.007557161 | 0.040074029 |
| TFDP2     | 88.27167123 | -0.326764746 | 0.12238993  | -2.669866279 | 0.007588146 | 0.040226888 |
| PLP2      | 740.1468983 | 0.191450483  | 0.071713498 | 2.66965758   | 0.007592864 | 0.040240449 |
| FBXO3     | 260.7245989 | -0.288728647 | 0.108203391 | -2.668388152 | 0.007621615 | 0.040369862 |
| MARVELD2  | 7.072040789 | 0.984484037  | 0.36893057  | 2.668480514  | 0.00761952  | 0.040369862 |
| CTAGE15P  | 8.528578429 | 0.896430254  | 0.3360498   | 2.667551816  | 0.007640611 | 0.040458977 |
| FPR2      | 172.3932303 | 0.588095373  | 0.220585356 | 2.666067155  | 0.007674436 | 0.040615008 |
| PARP11    | 180.4073078 | 0.377621951  | 0.141637553 | 2.666114632  | 0.007673352 | 0.040615008 |
| APOC1P1   | 3.57705668  | -1.251759229 | 0.469842777 | -2.664208729 | 0.007716966 | 0.040828492 |
| FBXO48    | 41.63671069 | 0.374709625  | 0.140682213 | 2.663518143  | 0.007732824 | 0.040900779 |

|           |             |              |             |              |             |             |
|-----------|-------------|--------------|-------------|--------------|-------------|-------------|
| CPNE9     | 8.572924084 | -0.854940673 | 0.321065128 | -2.662826323 | 0.00774874  | 0.04097333  |
| FAM168B   | 664.155933  | -0.221818448 | 0.083324511 | -2.662103205 | 0.007765407 | 0.041049811 |
| LOC100121 | 16.87842404 | -0.721264452 | 0.27097155  | -2.661771885 | 0.007773054 | 0.041078583 |
| C11orf74  | 43.80669697 | -0.306448583 | 0.115168016 | -2.660882704 | 0.00779361  | 0.041175541 |
| FOXD2     | 16.59956201 | 0.738486968  | 0.277652974 | 2.659748094  | 0.007819911 | 0.041302786 |
| MSL1      | 286.2807068 | -0.18019589  | 0.067779502 | -2.658560239 | 0.007847532 | 0.041436926 |
| ZNF383    | 77.43128824 | -0.386761155 | 0.145542209 | -2.657381383 | 0.00787503  | 0.041570341 |
| DDHD2     | 277.2486269 | -0.451670101 | 0.170056218 | -2.656004632 | 0.007907253 | 0.041727064 |
| MB21D1    | 299.8553508 | 0.476573859  | 0.179438219 | 2.655921695  | 0.007909198 | 0.041727064 |
| HYPK      | 571.1720306 | 0.144623129  | 0.054464318 | 2.655373884  | 0.007922055 | 0.041783066 |
| HLA-DQA2  | 6.766583656 | 1.947854257  | 0.73367539  | 2.654926529  | 0.007932568 | 0.041826678 |
| EIF4EBP3  | 294.6063946 | -0.246512689 | 0.092863697 | -2.654564682 | 0.007941081 | 0.041847882 |
| PLXNA1    | 907.9232533 | 0.261240201  | 0.098410968 | 2.654584202  | 0.007940622 | 0.041847882 |
| CREB3     | 192.9124942 | 0.292964976  | 0.110370538 | 2.65437663   | 0.007945509 | 0.041859375 |
| KLHL24    | 251.0225773 | -0.259304271 | 0.097717878 | -2.653601114 | 0.007963791 | 0.041943831 |
| FUT8      | 150.8256449 | -0.239447079 | 0.09024334  | -2.653349025 | 0.007969741 | 0.041963312 |
| C2orf71   | 20.48701818 | 0.905314177  | 0.341298999 | 2.652554448  | 0.007988524 | 0.042050328 |
| LOC100501 | 2.683816478 | 2.087029169  | 0.787202764 | 2.651196444  | 0.008020718 | 0.042207865 |
| CD28      | 17.83112113 | 0.578985244  | 0.218413484 | 2.650867678  | 0.008028529 | 0.042237043 |
| DUSP23    | 667.8740679 | -0.264254458 | 0.099695308 | -2.650620801 | 0.008034399 | 0.042255995 |
| PGM5P2    | 43.83670344 | -0.461751181 | 0.174235312 | -2.650158434 | 0.008045403 | 0.042301931 |
| PMFBP1    | 2.128179875 | -1.715784028 | 0.647518063 | -2.649785583 | 0.008054287 | 0.042334252 |
| UQCRFS1   | 1901.74392  | 0.251932978  | 0.095079461 | 2.649709781  | 0.008056094 | 0.042334252 |
| DPP7      | 1159.273448 | -0.261630446 | 0.098755877 | -2.649264577 | 0.008066715 | 0.042378114 |
| TRAF4     | 53.8953267  | 0.454331554  | 0.171551196 | 2.648372993  | 0.008088023 | 0.04247808  |
| C3orf38   | 481.1169477 | 0.213599292  | 0.080667117 | 2.647910333  | 0.0080991   | 0.042512292 |
| CDK20     | 18.34661297 | -0.545676943 | 0.206072445 | -2.64798597  | 0.008097289 | 0.042512292 |
| ARSG      | 4.365077031 | -1.241142106 | 0.468857545 | -2.647162486 | 0.008117034 | 0.042594428 |
| PRKACA    | 474.610411  | -0.244430808 | 0.09236439  | -2.646374963 | 0.008135958 | 0.042681711 |
| SIPA1     | 599.7344575 | -0.185425334 | 0.070126017 | -2.644173209 | 0.008189074 | 0.04294827  |
| DOCK6     | 38.5896507  | 0.489119594  | 0.185009505 | 2.643753863  | 0.008199226 | 0.042989411 |
| LOC550641 | 545.2581528 | -0.315741479 | 0.119438502 | -2.643548559 | 0.0082042   | 0.043003391 |
| MDGA1     | 8.795341442 | 1.108210398  | 0.419252846 | 2.64329845   | 0.008210263 | 0.043023071 |
| ZNF140    | 213.4875652 | 0.164123806  | 0.062095312 | 2.643094972  | 0.008215199 | 0.043036833 |
| AKT3      | 1264.267959 | 0.219860333  | 0.083195688 | 2.642689023  | 0.008225054 | 0.043076351 |
| DEPDC7    | 13.35655418 | -0.52823511  | 0.199903856 | -2.642445825 | 0.008230963 | 0.043095186 |
| KHNYN     | 565.0223068 | 0.164528619  | 0.062284107 | 2.641582718  | 0.008251965 | 0.043193012 |
| HIST1H2AC | 333.5193153 | -0.411086922 | 0.155677564 | -2.640630487 | 0.008275192 | 0.043302422 |
| CA5B      | 29.02387546 | -0.42886306  | 0.162420136 | -2.640455    | 0.008279479 | 0.043312691 |
| GPR162    | 17.88769982 | -0.784195516 | 0.297020419 | -2.640207423 | 0.00828553  | 0.043332182 |
| NIPAL4    | 3.986216433 | 2.56063636   | 0.969905186 | 2.640089357  | 0.008288417 | 0.043335119 |
| COL6A1    | 424.9642878 | 0.345353175  | 0.130826327 | 2.639783466  | 0.008295901 | 0.043362083 |
| ZBTB33    | 269.3067265 | -0.27369947  | 0.103781664 | -2.637262302 | 0.008357818 | 0.043673465 |
| ATP6V1E1  | 3444.857296 | 0.136036018  | 0.051587391 | 2.637001309  | 0.008364251 | 0.043694828 |
| TMA7      | 455.0117798 | -0.426826835 | 0.161927069 | -2.635920217 | 0.008390946 | 0.043821997 |
| MNS1      | 1.991222928 | -1.481691969 | 0.562180797 | -2.635614693 | 0.008398504 | 0.043849179 |
| LIPC      | 19.86851992 | -0.69415073  | 0.263486396 | -2.634484139 | 0.008426524 | 0.043983151 |
| GNG12     | 563.7208997 | -0.156395466 | 0.059368553 | -2.634314942 | 0.008430725 | 0.043992754 |
| UTP20     | 85.00758212 | -0.255054301 | 0.096881034 | -2.632654609 | 0.008472045 | 0.044195995 |

|          |             |              |             |              |             |             |
|----------|-------------|--------------|-------------|--------------|-------------|-------------|
| TNFRSF1B | 1621.065227 | 0.226884601  | 0.086232355 | 2.631084365  | 0.00851129  | 0.044388297 |
| CRAMP1L  | 95.07040845 | 0.271549419  | 0.103219545 | 2.630794573  | 0.008518551 | 0.044413732 |
| KITLG    | 12.17495279 | -0.63091368  | 0.240044821 | -2.628316146 | 0.008580873 | 0.044726148 |
| PFDN5    | 4264.888046 | -0.241530863 | 0.091904416 | -2.628065915 | 0.008587187 | 0.044746547 |
| MSI2     | 54.22094235 | -0.337774208 | 0.128545306 | -2.627666607 | 0.008597273 | 0.044786577 |
| SUV420H1 | 337.6871316 | -0.231669374 | 0.088178333 | -2.627282318 | 0.008606989 | 0.044824661 |
| TMEM184I | 1000.897207 | -0.291340821 | 0.11089917  | -2.627078449 | 0.008612148 | 0.044838994 |
| SRF      | 486.3217199 | 0.122504007  | 0.046636438 | 2.626787404  | 0.008619517 | 0.044864826 |
| ATP6V1F  | 143.3691889 | 0.216432008  | 0.082415613 | 2.626104454  | 0.008636831 | 0.044907692 |
| NT5E     | 4.33534953  | 2.05381266   | 0.782082358 | 2.626082331  | 0.008637392 | 0.044907692 |
| SHFM1    | 1826.996127 | 0.24765207   | 0.094302777 | 2.626137628  | 0.008635989 | 0.044907692 |
| TWISTNB  | 178.5331282 | 0.27042816   | 0.102971239 | 2.626249469  | 0.008633152 | 0.044907692 |
| USP27X   | 56.57115288 | -0.366116899 | 0.139550549 | -2.623543231 | 0.00870204  | 0.04523119  |
| TPK1     | 416.7807434 | 0.246790576  | 0.094087329 | 2.622994817  | 0.00871606  | 0.045291428 |
| LANCL2   | 247.813769  | 0.219171309  | 0.08356244  | 2.622844783  | 0.008719899 | 0.045298744 |
| ZNF84    | 88.57387592 | -0.285322202 | 0.108806907 | -2.622280231 | 0.008734358 | 0.045361211 |
| KLHL5    | 358.7613339 | 0.182342431  | 0.069556194 | 2.621512492  | 0.008754055 | 0.045450841 |
| CLIC6    | 11.32993807 | 1.139844441  | 0.434846083 | 2.621259536  | 0.008760554 | 0.045471912 |
| GAMT     | 5.438794186 | -1.149827027 | 0.438757354 | -2.620644454 | 0.008776374 | 0.04554134  |
| BLMH     | 179.5436677 | -0.309545039 | 0.118125618 | -2.620473388 | 0.008780778 | 0.04555151  |
| VPS36    | 696.9925862 | -0.141957652 | 0.054181776 | -2.620025826 | 0.008792311 | 0.045598642 |
| C19orf73 | 11.81540671 | -0.774156842 | 0.29553157  | -2.619540243 | 0.008804838 | 0.045650906 |
| NDUFA9   | 1021.856706 | 0.272378178  | 0.104009901 | 2.618771646  | 0.0088247   | 0.045741157 |
| ELP2     | 111.4670873 | -0.41690915  | 0.159268883 | -2.617643465 | 0.008853926 | 0.045879883 |
| PCDHGB8F | 12.49544263 | -0.771143746 | 0.294652115 | -2.617132908 | 0.008867181 | 0.045935793 |
| PRKCA    | 127.8256908 | -0.28334314  | 0.108325303 | -2.615669034 | 0.008905283 | 0.046120357 |
| FAM176C  | 8.355916927 | -0.906611667 | 0.346663537 | -2.615249573 | 0.008916228 | 0.046164209 |
| SLX4     | 70.92050955 | 0.31409079   | 0.120185631 | 2.613380544  | 0.008965142 | 0.04640457  |
| RPA1     | 560.883477  | -0.200043348 | 0.076565335 | -2.612714334 | 0.008982635 | 0.046482204 |
| PDK3     | 54.30703823 | -0.640540636 | 0.245211135 | -2.612200446 | 0.008996149 | 0.046522042 |
| PRDX6    | 2871.58164  | 0.212618525  | 0.081393216 | 2.612238886  | 0.008995138 | 0.046522042 |
| PURB     | 323.3538196 | 0.269492826  | 0.10316949  | 2.612136833  | 0.008997823 | 0.046522042 |
| DNPEP    | 237.8019126 | 0.330483206  | 0.126544261 | 2.611601689  | 0.009011918 | 0.046581993 |
| NOTCH3   | 105.0992176 | 0.452685834  | 0.173343115 | 2.611501673  | 0.009014555 | 0.046582699 |
| SMG1P1   | 1571.584472 | -0.225356628 | 0.08633491  | -2.610260777 | 0.009047323 | 0.046739065 |
| KCTD2    | 252.7898364 | -0.188475115 | 0.072214542 | -2.609932985 | 0.009055996 | 0.046770907 |
| SPIN4    | 182.3369259 | 0.404840027  | 0.155129642 | 2.609688395  | 0.009062473 | 0.046791389 |
| MED8     | 365.523499  | 0.187005863  | 0.07166259  | 2.609532567  | 0.009066602 | 0.046799738 |
| HCST     | 1029.21713  | 0.210411018  | 0.080641254 | 2.609223039  | 0.009074807 | 0.046803749 |
| SCGB1A1  | 13.7188764  | 1.366163496  | 0.523567791 | 2.609334491  | 0.009071852 | 0.046803749 |
| TMEM41B  | 249.3695886 | 0.355720967  | 0.136333595 | 2.609195238  | 0.009075545 | 0.046803749 |
| ZNF569   | 54.78366871 | -0.347561495 | 0.133210017 | -2.609124323 | 0.009077426 | 0.046803749 |
| PLEKHG4  | 12.05997841 | -0.738072277 | 0.282967779 | -2.608326218 | 0.00909862  | 0.04690005  |
| KCNS3    | 1.692789282 | 1.917863043  | 0.735383078 | 2.607978211  | 0.009107875 | 0.046934775 |
| PCDHGA12 | 16.41483521 | 0.668835101  | 0.256544693 | 2.607089988  | 0.009131536 | 0.047043693 |
| ASF1A    | 298.3661736 | -0.255953317 | 0.098266941 | -2.604673694 | 0.00919618  | 0.047337461 |
| PARK2    | 8.934603848 | -0.875024992 | 0.33593406  | -2.604752231 | 0.009194072 | 0.047337461 |
| RPL23A   | 274.789786  | 0.257558983  | 0.098882636 | 2.604693747  | 0.009195641 | 0.047337461 |
| SDC3     | 334.0353912 | -0.356057497 | 0.1367115   | -2.604444375 | 0.009202336 | 0.047356068 |

|           |             |              |             |              |             |             |
|-----------|-------------|--------------|-------------|--------------|-------------|-------------|
| CYBB      | 13787.73318 | 0.272181479  | 0.104540042 | 2.603609817  | 0.009224771 | 0.047458416 |
| SUZ12P1   | 89.51473354 | -0.249517239 | 0.095864775 | -2.60280419  | 0.009246475 | 0.047556945 |
| NUCB2     | 119.0262535 | -0.27471767  | 0.105572468 | -2.602171518 | 0.009263551 | 0.047621073 |
| TJP2      | 107.6918991 | 0.300780681  | 0.115589166 | 2.602152879  | 0.009264054 | 0.047621073 |
| HMGN3     | 57.56803642 | -0.524476607 | 0.201599301 | -2.601579498 | 0.009279556 | 0.047680786 |
| PSENE1    | 453.9558806 | -0.172792196 | 0.066419351 | -2.601533933 | 0.009280788 | 0.047680786 |
| MARK4     | 199.805678  | -0.218565421 | 0.0840325   | -2.600962965 | 0.009296249 | 0.047747051 |
| SRP68     | 397.1278744 | 0.167633251  | 0.064480969 | 2.599732189  | 0.009329654 | 0.047902192 |
| ZNF35     | 57.63645064 | -0.334732913 | 0.128760228 | -2.599660758 | 0.009331596 | 0.047902192 |
| AKTIP     | 303.691323  | -0.246805442 | 0.094958986 | -2.599074121 | 0.009347559 | 0.047967405 |
| TMEM30A   | 2465.219728 | -0.149547816 | 0.057540417 | -2.599004743 | 0.009349448 | 0.047967405 |
| ESYT1     | 3482.603226 | -0.179412885 | 0.0690388   | -2.598725423 | 0.009357059 | 0.047993237 |
| GTF2A2    | 668.2700267 | -0.160538269 | 0.061812082 | -2.597198885 | 0.009398749 | 0.048193804 |
| FOLR2     | 4.472509353 | -1.378687536 | 0.531036058 | -2.596222076 | 0.009425512 | 0.048317743 |
| RNASE2    | 4.728410205 | -1.286548705 | 0.495820657 | -2.594786415 | 0.009464972 | 0.048506678 |
| PMF1      | 342.7884326 | -0.164741932 | 0.063498154 | -2.594436561 | 0.00947461  | 0.048542721 |
| HS6ST1    | 166.5107956 | -0.201488767 | 0.077697145 | -2.593258307 | 0.009507134 | 0.048695967 |
| CPNE3     | 544.265898  | -0.280517972 | 0.108188252 | -2.592869067 | 0.0095179   | 0.048710944 |
| LOC154093 | 18.76252027 | 0.609252048  | 0.234962728 | 2.592973165  | 0.009515019 | 0.048710944 |
| SUPT3H    | 43.70958661 | -0.324169732 | 0.125021399 | -2.592913971 | 0.009516657 | 0.048710944 |
| SIRT1     | 116.3634959 | -0.302954357 | 0.116848042 | -2.592720861 | 0.009522002 | 0.048718557 |
| MIB2      | 45.20613212 | -0.353724682 | 0.136435222 | -2.592619978 | 0.009524795 | 0.048719471 |
| SESN1     | 218.5632943 | -0.49501298  | 0.191081651 | -2.590583535 | 0.009581336 | 0.048995232 |
| KCNK6     | 30.27967546 | -0.729173915 | 0.281565353 | -2.589714634 | 0.009605552 | 0.049105586 |
| EDA       | 8.953027126 | -1.013390928 | 0.391484942 | -2.58858214  | 0.009637196 | 0.049253842 |
| TYW5      | 23.33008403 | 0.507600675  | 0.196109962 | 2.588347225  | 0.009643772 | 0.049273934 |
| MIIP      | 639.6656225 | 0.157796265  | 0.060966996 | 2.588224381  | 0.009647212 | 0.049277999 |
| LOH12CR1  | 262.5710835 | 0.187143452  | 0.072327443 | 2.587447372  | 0.009668996 | 0.049375741 |
| GPAM      | 63.64249775 | -0.333984392 | 0.12908777  | -2.587265948 | 0.009674089 | 0.049388214 |
| CYTH2     | 270.696884  | 0.21174893   | 0.081857345 | 2.586804288  | 0.00968706  | 0.049439009 |
| TRMT6     | 173.8004601 | 0.23326331   | 0.090177151 | 2.586722987  | 0.009689345 | 0.049439009 |
| FAH       | 123.3301882 | -0.324979127 | 0.125640319 | -2.586583117 | 0.009693279 | 0.04944554  |
| TRAPPC12  | 772.4940643 | -0.199701437 | 0.077243796 | -2.585339492 | 0.009728316 | 0.049610682 |
| ENGASE    | 67.38876631 | -0.445914485 | 0.172487744 | -2.585195177 | 0.009732389 | 0.049617875 |
| PARP4     | 1520.948808 | -0.147090767 | 0.05691381  | -2.58444771  | 0.009753509 | 0.049711951 |
| PFKFB3    | 615.1946951 | -0.383001118 | 0.148252569 | -2.583436635 | 0.009782143 | 0.049844261 |
| ATP1B3    | 2869.933835 | 0.189528294  | 0.073366745 | 2.583299766  | 0.009786025 | 0.049850409 |
| UBR5      | 383.4489487 | -0.227122379 | 0.087931557 | -2.582945049 | 0.009796092 | 0.049888053 |
| LHPP      | 334.9664673 | -0.274444495 | 0.106284296 | -2.582173532 | 0.00981802  | 0.049958763 |
| MOGAT1    | 25.06014812 | -0.504108725 | 0.195212352 | -2.58236079  | 0.009812694 | 0.049958763 |
| ZNF174    | 128.832971  | -0.263871624 | 0.102189267 | -2.58218531  | 0.009817685 | 0.049958763 |
