# Supplementary material for: Human alveolar macrophage response to Mycobacterium tuberculosis: immune characteristics underlying large inter-individual variability
Source: Research Square preprint supplement (doi:10.21203/rs.3.rs-2986649/v1), 2023-06-08
Supplement: Supplementary file 8 [file 9b7191ea2425db56e561d460.pdf]

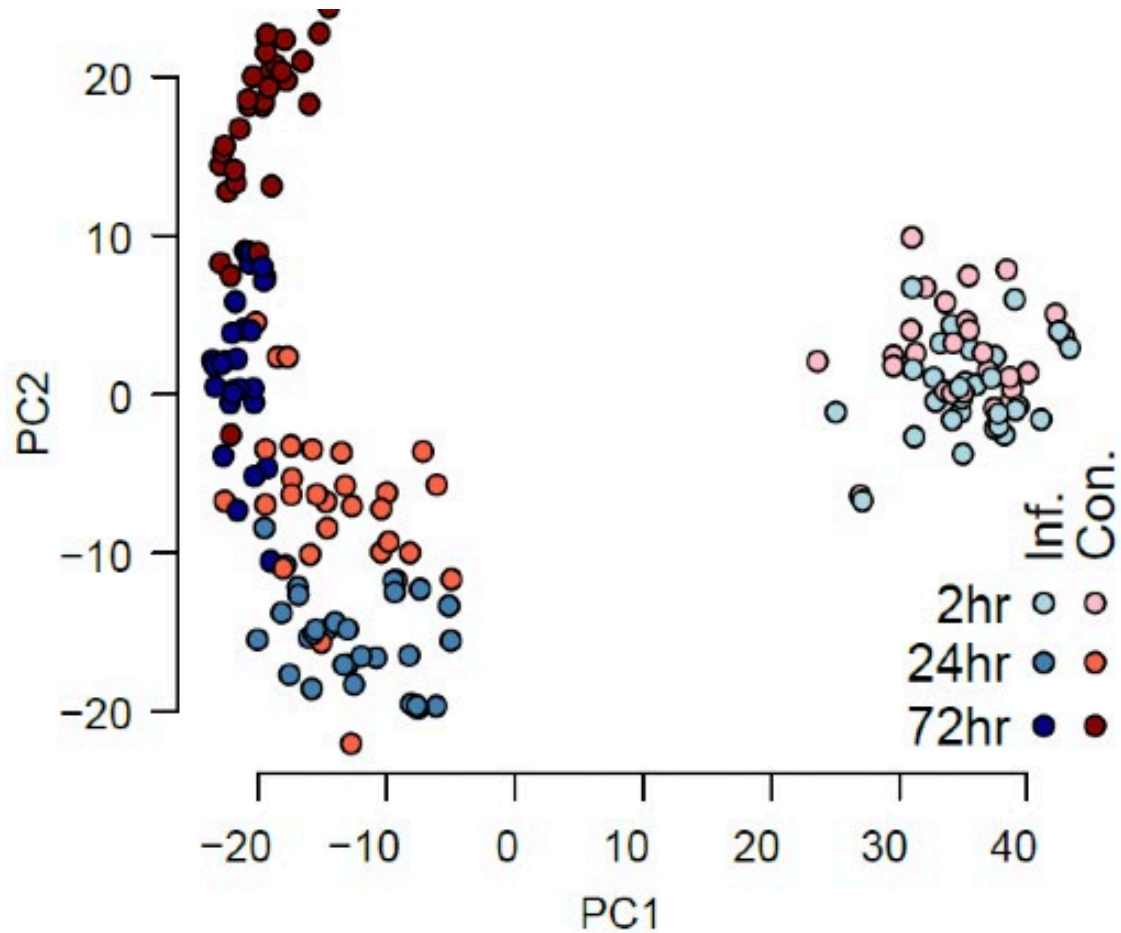

**Additional file 4: Supplementary Fig. 1. The transcriptional response of 28 human AM cultures to *in vitro* incubation and to *M.tb* infection.** A principle component analysis of normalized gene expression reveals the impact of cell culture conditions with and without *M.tb* infection.
