# Supplementary material for: Human alveolar macrophage response to Mycobacterium tuberculosis: immune characteristics underlying large inter-individual variability
Source: Research Square preprint supplement (doi:10.21203/rs.3.rs-2986649/v1), 2023-06-08
Supplement: Supplementary file 9 [file ad97dfe7e2919f6f524ffc13.pdf]

**Additional file 7: Table S5A. Variably expressed genes (VE genes) .**

RNAs displaying the most variable expression between AMs based on variance and entropy in AM controls and *M.tb*-treated cells.

All of the most variably expressed genes (VE Genes) were also significant DE genes (VE/DE genes), hence ordered in decreasing DE Expr Log2 Ratios (column C).

All samples at all-time points were subjected to Levene's test (using ratios of variances as a test statistic) (60) to find RNAs that are differentially variable between control samples and *M.tb* stimulated AMs, yielding RNAs with highest variance in cases that are induced (or inhibited) by *M.tb* stimulation only in a subset of individuals (encoded by VE genes). A second analysis asked whether the entropy of RNA expression in the *M.tb*-treated group is higher than

expected given the total entropy over all AM samples (61), using a permutation test to yield p-values for significance of the entropy computations. tau ratios are ratios of standard deviations (non-treated/treated). FDR Levene and FDR entropy are the respective adjusted p values.

Columns I, J, and K present correlation values (r, red positive, blue negative) for each VE/DE gene with generation time over 48-72h (as in Additional file 3: Table S3), using RPM expression values for each gene at 2, 24, and 72h in infected AMs.

| Symbol  | Average RPM across all samples | DE Expr Log2 Ratio | DE Expr p-value | Time point (hrs) | FDR Levene | tau ratio | FDR entropy | Cor to generation time - 2hr | Cor to generation time - 24hr | Cor to generation time - 72hr |
|---------|--------------------------------|--------------------|-----------------|------------------|------------|-----------|-------------|------------------------------|-------------------------------|-------------------------------|
| IFI6    | 1,165.2                        | 7.1                | 1.73E-10        | 72               | 0.03       | 0.88      | 0.00        | -0.14                        | 0.16                          | 0.27                          |
| IL1B    | 780.3                          | 6.9                | 7.26E-12        | 24               | 0.00       | 1.57      | 0.00        | -0.20                        | -0.15                         | -0.11                         |
| TNFAIP6 | 611.9                          | 4.8                | 1E-10           | 72               | 0.11       | 0.91      | 0.00        | -0.07                        | 0.08                          | 0.03                          |
| TYMP    | 552.2                          | 6.6                | 0.00022         | 72               | 0.05       | 0.86      | 0.00        | 0.14                         | 0.30                          | 0.26                          |
| CCL4    | 474.2                          | 4.9                | 1.16E-10        | 72               | 0.02       | 1.33      | 0.00        | -0.19                        | 0.15                          | 0.01                          |
| LAP3    | 462.5                          | 6.3                | 1.13E-10        | 72               | 0.00       | 0.55      | 0.00        | -0.07                        | 0.17                          | -0.02                         |
| CCL20   | 380.7                          | 2.8                | 3.73E-11        | 72               | 0.02       | 1.80      | 0.00        | -0.36                        | -0.06                         | -0.07                         |
| CCL3    | 355.0                          | 6.0                | 7.74E-12        | 24               | 0.01       | 1.41      | 0.00        | -0.11                        | 0.08                          | -0.08                         |
| IL7R    | 333.3                          | 4.2                | 1.4E-09         | 72               | 0.04       | 1.01      | 0.00        | -0.06                        | -0.03                         | -0.08                         |
| SLAMF7  | 309.5                          | 5.6                | 2.37E-08        | 72               | 0.00       | 0.95      | 0.00        | -0.06                        | 0.05                          | -0.05                         |
| MX1     | 307.5                          | 5.8                | 5.64E-11        | 72               | 0.00       | 0.69      | 0.00        |                              |                               |                               |
| GBP1    | 298.7                          | 5.5                | 4.12E-11        | 72               | 0.00       | 0.40      | 0.00        | -0.22                        | -0.03                         | -0.09                         |
| TAP1    | 194.1                          | 5.3                | 4.39E-09        | 72               | 0.00       | 0.56      | 0.00        | -0.17                        | -0.03                         | 0.05                          |
| PARP14  | 158.4                          | 5.3                | 1.07E-11        | 72               | 0.00       | 0.67      | 0.00        | 0.03                         | -0.05                         | 0.17                          |
| NPL     | 151.5                          | 5.2                | 2.78E-06        | 72               | 0.00       | 1.51      | 0.00        | -0.11                        | -0.25                         | -0.26                         |
| STAT2   | 140.4                          | 5.2                | 3.4E-09         | 72               | 0.00       | 0.55      | 0.00        | -0.34                        | -0.03                         | -0.08                         |
| ISG15   | 136.3                          | 4.8                | 4.69E-11        | 72               | 0.00       | 0.65      | 0.00        | -0.29                        | 0.20                          | 0.28                          |
| PSMB9   | 134.1                          | 4.9                | 9.61E-08        | 72               | 0.00       | 0.56      | 0.00        | -0.24                        | 0.00                          | -0.07                         |
| CD274   | 118.9                          | 4.9                | 6.47E-10        | 24               | 0.00       | 0.91      | 0.00        | 0.05                         | 0.11                          | 0.09                          |
| OAS3    | 118.4                          | 4.8                | 5.71E-11        | 72               | 0.00       | 0.65      | 0.00        | -0.01                        | 0.13                          | 0.36                          |
| RIPK2   | 110.2                          | 4.5                | 1.62E-07        | 72               | 0.01       | 0.89      | 0.00        | -0.06                        | 0.08                          | 0.05                          |
| IFI35   | 106.3                          | 4.7                | 6.35E-08        | 72               | 0.00       | 0.58      | 0.00        | -0.20                        | -0.05                         | -0.05                         |
| APOL1   | 106.0                          | 4.5                | 8.44E-08        | 72               | 0.05       | 0.68      | 0.00        | -0.18                        | -0.07                         | -0.05                         |
| ZNFX1   | 98.4                           | 4.6                | 2.04E-09        | 72               | 0.04       | 0.87      | 0.00        |                              |                               |                               |
| GBP5    | 93.2                           | 3.9                | 1.55E-07        | 72               | 0.07       | 0.92      | 0.00        | -0.12                        | 0.03                          | 0.02                          |
| IDO1    | 89.4                           | 1.9                | 1.46E-08        | 72               | 0.14       | 1.83      | 0.00        |                              | -0.06                         | -0.12                         |
| IFITM3  | 84.0                           | 4.4                | 8.52E-10        | 72               | 0.00       | 0.78      | 0.00        | -0.05                        | 0.18                          | 0.28                          |
| VDR     | 81.1                           | 4.4                | 3.04E-08        | 24               | 0.08       | 1.09      | 0.00        | 0.36                         | -0.05                         | 0.23                          |
| DYNLT1  | 79.3                           | 4.6                | 6.38E-06        | 72               | 0.00       | 0.70      | 0.00        | -0.24                        | 0.30                          | 0.21                          |
| C1RL    | 78.0                           | 4.5                | 0.0000065       | 72               | 0.03       | 0.88      | 0.00        | 0.20                         | 0.30                          | 0.24                          |
| IFITM1  | 75.7                           | 4.3                | 8.5E-10         | 72               | 0.00       | 0.79      | 0.00        | -0.03                        | 0.15                          | 0.29                          |
| EPSTI1  | 55.5                           | 4.0                | 2.41E-06        | 72               | 0.00       | 0.81      | 0.00        | -0.30                        | -0.15                         | -0.24                         |
| IFIH1   | 45.2                           | 4.0                | 2.61E-08        | 72               | 0.00       | 0.73      | 0.00        | -0.39                        | -0.25                         | -0.22                         |
| SAMD9L  | 43.7                           | 3.8                | 3.5E-10         | 72               | 0.00       | 0.80      | 0.00        | -0.35                        | -0.19                         | -0.23                         |
| DDX60   | 38.6                           | 3.8                | 1.3E-11         | 72               | 0.00       | 0.62      | 0.00        |                              |                               |                               |
| TAGAP   | 34.1                           | 3.7                | 4.93E-08        | 72               | 0.00       | 0.62      | 0.00        | -0.21                        | -0.01                         | -0.05                         |
| DCUN1D3 | 33.5                           | 3.6                | 2.42E-12        | 24               | 0.00       | 1.03      | 0.00        | -0.25                        | -0.33                         | -0.25                         |
| CXCL1   | 31.5                           | 3.4                | 2.59E-11        | 24               | 0.00       | 1.44      | 0.00        |                              |                               |                               |
| PARP9   | 29.5                           | 3.5                | 1.21E-11        | 72               | 0.00       | 0.66      | 0.00        | 0.00                         | 0.24                          | 0.38                          |
| HSD11B1 | 29.3                           | 3.4                | 7.91E-11        | 24               | 0.00       | 1.49      | 0.00        |                              | 0.33                          | 0.24                          |
| GCH1    | 26.6                           | 2.4                | 5.84E-11        | 72               | 0.02       | 0.89      | 0.00        | 0.14                         | 0.15                          | 0.04                          |
| IFIT3   | 26.3                           | 3.1                | 2.81E-11        | 72               | 0.00       | 0.99      | 0.00        | -0.49                        | 0.02                          | -0.10                         |
| PML     | 26.0                           | 3.4                | 1.92E-09        | 72               | 0.00       | 0.55      | 0.00        | -0.18                        | -0.09                         | 0.18                          |
| WDR91   | 23.6                           | 3.3                | 3.77E-08        | 72               | 0.00       | 1.31      | 0.00        | 0.03                         | 0.03                          | 0.06                          |
| IFIT5   | 21.5                           | 3.2                | 8.5E-09         | 72               | 0.00       | 0.61      | 0.00        | -0.26                        | 0.11                          | 0.25                          |
| DHX58   | 20.7                           | 3.1                | 1.93E-10        | 72               | 0.01       | 0.61      | 0.00        |                              |                               |                               |
| FBXO6   | 19.4                           | 3.1                | 1.94E-08        | 72               | 0.00       | 0.74      | 0.00        |                              |                               |                               |
| F3      | 18.9                           | 2.5                | 2.02E-08        | 24               | 0.03       | 1.49      | 0.00        | -0.05                        | 0.07                          | -0.04                         |
| CYP27B1 | 18.3                           | 2.6                | 3.77E-10        | 24               | 0.00       | 1.60      | 0.00        |                              | -0.23                         | -0.16                         |
| SCARF1  | 17.5                           | 3.0                | 2.06E-12        | 24               | 0.00       | 0.71      | 0.00        | 0.04                         | -0.18                         | 0.02                          |
| RTP4    | 15.9                           | 3.0                | 6.14E-09        | 72               | 0.00       | 0.60      | 0.00        | -0.39                        | 0.21                          | 0.32                          |
| HERC6   | 12.5                           | 2.7                | 9.76E-11        | 72               | 0.00       | 0.72      | 0.00        | -0.15                        | 0.18                          | 0.20                          |
| PDLIM4  | 10.8                           | 2.8                | 1.13E-08        | 72               | 0.01       | 1.12      | 0.00        |                              | 0.26                          | 0.17                          |
| HELZ2   | 10.1                           | 2.2                | 1.79E-08        | 72               | 0.01       | 0.77      | 0.00        | -0.23                        | -0.12                         | -0.10                         |
| APBA1   | 8.0                            | 2.3                | 3.52E-08        | 72               | 0.02       | 1.29      | 0.00        | 0.10                         | 0.21                          | -0.09                         |

|          |         |     |          |    |      |      |      |       |  |       |       |
|----------|---------|-----|----------|----|------|------|------|-------|--|-------|-------|
| ISG20    | 7.9     | 1.1 | 5.91E-11 | 72 | 0.01 | 0.53 | 0.00 |       |  | -0.14 | 0.06  |
| CCL8     | 4.7     | 0.4 | 2.85E-08 | 72 | 0.01 | 1.01 | 0.00 |       |  |       | -0.23 |
| CHMP5    | 223.2   | 5.5 | 3.96E-09 | 72 | 0.01 | 0.75 | 0.00 | -0.06 |  | 0.34  | 0.27  |
| DDX58    | 117.1   | 4.6 | 1.12E-10 | 72 | 0.12 | 1.11 | 0.00 |       |  |       |       |
| EMP1     | 106.8   | 5.0 | 1.5E-10  | 24 | 0.00 | 0.91 | 0.00 | 0.13  |  | -0.16 | 0.00  |
| GOS2     | 106.1   | 3.7 | 8.36E-08 | 72 | 0.04 | 1.09 | 0.00 | -0.04 |  | 0.16  | 0.12  |
| DTX3L    | 102.2   | 4.8 | 1.67E-08 | 72 | 0.00 | 0.63 | 0.00 |       |  |       |       |
| OAS2     | 90.3    | 4.6 | 4.32E-07 | 72 | 0.00 | 0.76 | 0.00 | -0.27 |  | -0.16 | -0.11 |
| KCNN4    | 86.8    | 4.8 | 4.27E-08 | 24 | 0.00 | 1.18 | 0.00 | -0.26 |  | -0.09 | -0.02 |
| TLR2     | 62.9    | 4.6 | 7.93E-11 | 24 | 0.01 | 1.12 | 0.00 | 0.09  |  | -0.14 | 0.00  |
| CMPK2    | 57.5    | 3.9 | 2.63E-09 | 72 | 0.00 | 0.82 | 0.00 | -0.25 |  | -0.19 | -0.04 |
| EYA3     | 56.9    | 4.1 | 8.54E-08 | 24 | 0.15 | 0.77 | 0.00 | 0.20  |  | 0.19  | 0.34  |
| HERC5    | 49.0    | 4.1 | 3.99E-10 | 72 | 0.00 | 0.62 | 0.00 | -0.20 |  | 0.20  | 0.19  |
| N4BP1    | 40.3    | 3.9 | 1.85E-08 | 24 | 0.02 | 0.91 | 0.00 | -0.26 |  | -0.30 | -0.14 |
| IL15RA   | 36.1    | 3.7 | 3.61E-09 | 72 | 0.00 | 0.60 | 0.00 | -0.46 |  | -0.14 | -0.04 |
| NLRC5    | 29.5    | 3.5 | 2.93E-08 | 72 | 0.00 | 0.71 | 0.00 | -0.12 |  | -0.12 | 0.01  |
| EEDP1    | 12.6    | 2.5 | 6.53E-09 | 24 | 0.00 | 1.00 | 0.00 | 0.13  |  | -0.10 | -0.10 |
| CSF1     | 1,031.9 | 7.3 | 4.21E-11 | 24 | 0.00 | 1.00 | 0.00 | 0.08  |  | -0.14 | -0.22 |
| ALAS1    | 191.1   | 5.3 | 4.41E-06 | 72 | 0.00 | 0.75 | 0.00 | -0.17 |  | -0.29 | -0.18 |
| SLC30A1  | 172.6   | 5.2 | 0.000012 | 72 | 0.03 | 0.80 | 0.00 | 0.35  |  | 0.22  | 0.30  |
| PARP12   | 82.1    | 4.6 | 2.45E-08 | 72 | 0.00 | 0.71 | 0.00 | -0.27 |  | -0.19 | -0.29 |
| CERK     | 51.9    | 4.2 | 8.24E-10 | 72 | 0.02 | 1.38 | 0.00 | -0.20 |  | -0.04 | -0.01 |
| PPBP     | 25.4    | 3.5 | 3.02E-11 | 24 | 0.00 | 1.16 | 0.00 | 0.05  |  | -0.33 | -0.03 |
| USP18    | 17.4    | 2.9 | 9.73E-10 | 72 | 0.00 | 0.84 | 0.00 | -0.27 |  | 0.12  | 0.15  |
| STAT1    | 491.6   | 6.4 | 5.64E-09 | 72 | 0.00 | 0.73 | 0.00 | -0.35 |  | -0.22 | -0.33 |
| PIK3AP1  | 451.0   | 6.3 | 2.98E-07 | 72 | 0.01 | 0.89 | 0.00 | -0.15 |  | 0.09  | -0.05 |
| PLSCR1   | 197.5   | 5.3 | 1.37E-10 | 72 | 0.01 | 0.87 | 0.00 | -0.30 |  | -0.03 | -0.02 |
| TAP2     | 93.1    | 4.5 | 1.34E-09 | 72 | 0.00 | 0.63 | 0.00 | -0.25 |  | -0.10 | 0.04  |
| SEMA4D   | 74.2    | 4.2 | 1.48E-08 | 72 | 0.00 | 0.68 | 0.00 | -0.20 |  | -0.01 | -0.06 |
| SPRED1   | 65.4    | 4.4 | 1.55E-11 | 24 | 0.00 | 0.80 | 0.00 | 0.16  |  | -0.13 | -0.14 |
| IFIT1    | 41.4    | 3.6 | 2.68E-10 | 72 | 0.00 | 0.80 | 0.00 | -0.39 |  | 0.07  | 0.07  |
| CA12     | 8.1     | 0.8 | 3.96E-09 | 72 | 0.00 | 1.37 | 0.00 |       |  | -0.39 | -0.23 |
| CHST3    | 5.3     | 1.3 | 1.84E-07 | 72 | 0.01 | 1.19 | 0.00 |       |  | -0.06 | 0.00  |
| NBN      | 98.9    | 4.5 | 6.69E-08 | 72 | 0.01 | 0.87 | 0.00 | -0.31 |  | -0.16 | -0.02 |
| CHPT1    | 52.6    | 4.0 | 1.27E-06 | 72 | 0.00 | 1.18 | 0.00 | -0.17 |  | -0.16 | -0.23 |
| HIP1     | 40.8    | 3.6 | 5.24E-09 | 72 | 0.00 | 0.78 | 0.00 | -0.08 |  | 0.05  | 0.21  |
| C19orf66 | 28.5    | 3.4 | 1.73E-06 | 72 | 0.07 | 0.83 | 0.00 | -0.28 |  | 0.27  | 0.25  |
| STOM     | 437.1   | 6.2 | 8.08E-06 | 72 | 0.02 | 0.73 | 0.00 | -0.01 |  | -0.13 | -0.15 |
| SORL1    | 26.9    | 2.1 | 1.27E-10 | 24 | 0.06 | 0.98 | 0.00 | -0.06 |  | -0.06 | 0.06  |
| YPEL3    | 22.1    | 2.9 | 3.02E-11 | 24 | 0.11 | 1.04 | 0.00 | 0.00  |  | 0.09  | 0.07  |
| GPR84    | 19.1    | 3.0 | 1.47E-07 | 24 | 0.00 | 0.97 | 0.00 | -0.28 |  | -0.23 | -0.14 |
| SLAMF8   | 383.1   | 6.2 | 8.28E-08 | 24 | 0.00 | 0.86 | 0.00 | 0.07  |  | 0.02  | -0.03 |
| TMEM86A  | 39.6    | 4.0 | 7.35E-10 | 72 | 0.01 | 1.66 | 0.00 | -0.15 |  | -0.01 | -0.11 |
| IL1A     | 156.1   | 4.8 | 4.39E-10 | 24 | 0.06 | 1.32 | 0.00 | -0.01 |  | -0.08 | -0.05 |
| TPST2    | 45.1    | 3.9 | 0.00041  | 72 | 0.15 | 0.99 | 0.00 | -0.21 |  | -0.04 | -0.18 |
| MB21D2   | 11.6    | 2.8 | 6.56E-09 | 24 | 0.00 | 0.77 | 0.00 | -0.07 |  | -0.07 | -0.03 |
| WARS     | 852.5   | 7.0 | 0.000017 | 72 | 0.00 | 0.69 | 0.00 | 0.03  |  | 0.06  | -0.05 |
| DAPK1    | 327.0   | 6.0 | 1.47E-07 | 24 | 0.03 | 1.15 | 0.00 | 0.15  |  | 0.11  | 0.40  |
| GBP4     | 64.7    | 4.1 | 9.76E-11 | 72 | 0.03 | 0.41 | 0.00 | -0.13 |  | 0.00  | 0.02  |
| CFP      | 58.8    | 4.1 | 2.68E-10 | 72 | 0.00 | 1.47 | 0.00 | 0.07  |  | 0.22  | 0.31  |
| PSTPIP2  | 43.5    | 3.1 | 9.86E-07 | 72 | 0.00 | 0.94 | 0.00 | -0.04 |  | 0.08  | 0.03  |
| IFI44L   | 30.5    | 2.7 | 1.96E-10 | 72 | 0.00 | 1.23 | 0.00 | -0.27 |  | -0.14 | -0.17 |
| LIMK2    | 26.9    | 3.4 | 7.88E-07 | 24 | 0.07 | 0.87 | 0.00 | -0.30 |  | -0.24 | -0.14 |
| VWA8     | 96.5    | 4.9 | 3.09E-09 | 24 | 0.01 | 1.04 | 0.00 | -0.20 |  | -0.13 | -0.14 |
| CCL5     | 58.8    | 3.4 | 3.81E-09 | 72 | 0.14 | 0.55 | 0.00 | -0.30 |  | -0.13 | -0.07 |
| TNFSF10  | 16.8    | 2.5 | 1.58E-09 | 72 | 0.06 | 1.13 | 0.00 | -0.32 |  | 0.12  | 0.04  |
| FAM110A  | 10.0    | 2.4 | 0.00116  | 24 | 0.01 | 1.26 | 0.00 | -0.25 |  | -0.36 | -0.10 |
| MIR155HG | 9.4     | 2.6 | 7.79E-09 | 24 | 0.02 | 0.94 | 0.00 | -0.08 |  | -0.29 |       |
| PVALB    | 17.0    | 3.1 | 6.71E-10 | 72 | 0.03 | 1.39 | 0.00 | -0.43 |  | 0.08  | -0.13 |
| SLC27A1  | 23.6    | 3.6 | 4.69E-11 | 72 | 0.00 | 1.45 | 0.00 | 0.03  |  | -0.33 | -0.13 |
| LSM6     | 15.5    | 2.7 | 0.00531  | 24 | 0.09 | 1.22 | 0.00 | -0.05 |  | 0.07  | -0.03 |
| RUNX1    | 13.4    | 2.6 | 2.55E-09 | 24 | 0.02 | 0.99 | 0.00 |       |  |       |       |
| TMEM150A | 23.2    | 3.2 | 0.0017   | 72 | 0.15 | 1.25 | 0.00 | 0.01  |  | 0.31  | 0.24  |
| FUCA1    | 141.9   | 4.0 | 4.27E-08 | 24 | 0.05 | 1.50 | 0.00 | -0.31 |  | -0.20 | -0.14 |
| RASGRP1  | 13.0    | 2.1 | 7.05E-08 | 72 | 0.00 | 1.12 | 0.00 | -0.13 |  | 0.03  | 0.05  |
| SLC46A1  | 10.4    | 2.6 | 4.12E-11 | 72 | 0.00 | 1.34 | 0.00 | -0.15 |  |       | 0.02  |
| CD80     | 48.6    | 3.7 | 3.1E-08  | 72 | 0.00 | 0.99 | 0.00 | -0.04 |  | 0.01  | 0.02  |
| RAB42    | 41.9    | 4.1 | 5.39E-08 | 72 | 0.00 | 1.08 | 0.00 | -0.14 |  | 0.24  | 0.06  |

|          |         |     |           |    |      |      |      |       |       |       |
|----------|---------|-----|-----------|----|------|------|------|-------|-------|-------|
| CASS4    | 11.5    | 2.7 | 1.19E-09  | 24 | 0.00 | 0.92 | 0.00 |       | -0.43 | -0.12 |
| SP110    | 9.4     | 2.4 | 2.57E-10  | 72 | 0.01 | 0.70 | 0.00 | -0.15 | 0.14  | 0.38  |
| MT2A     | 899.2   | 6.3 | 1.93E-10  | 72 | 0.06 | 0.85 | 0.00 | -0.36 | -0.32 | -0.33 |
| XAF1     | 27.6    | 3.0 | 2.51E-09  | 72 | 0.03 | 1.23 | 0.00 |       |       |       |
| TRAFD1   | 86.2    | 4.4 | 6.99E-08  | 72 | 0.10 | 0.88 | 0.00 | -0.23 | -0.01 | -0.09 |
| UBD      | 62.7    | 2.5 | 3.08E-06  | 24 | 0.14 | 0.95 | 0.00 | 0.00  | -0.12 | -0.20 |
| GMPR     | 12.1    | 2.9 | 7.96E-08  | 72 | 0.01 | 0.62 | 0.00 | 0.03  | 0.20  | 0.21  |
| EIF2AK2  | 118.4   | 4.9 | 3.73E-11  | 72 | 0.01 | 0.78 | 0.00 | -0.02 | 0.25  | 0.31  |
| PIM1     | 269.7   | 5.6 | 2.61E-08  | 24 | 0.03 | 0.72 | 0.00 | 0.06  | 0.10  | 0.20  |
| EPHX1    | 185.1   | 5.4 | 8.87E-06  | 72 | 0.00 | 1.15 | 0.00 |       |       |       |
| AGRN     | 29.9    | 3.6 | 2.17E-08  | 72 | 0.00 | 0.67 | 0.00 | 0.05  | 0.23  | 0.45  |
| NEK6     | 10.3    | 2.5 | 7.43E-06  | 24 | 0.05 | 0.78 | 0.00 | 0.16  | -0.04 | 0.01  |
| CCL24    | 283.2   | 5.9 | 6.27E-09  | 24 | 0.00 | 0.98 | 0.00 | 0.14  | -0.15 | -0.03 |
| IRF1     | 111.5   | 4.5 | 1.47E-06  | 72 | 0.11 | 0.45 | 0.00 | -0.28 | -0.13 | -0.05 |
| LDLRAP1  | 32.4    | 3.5 | 1.85E-08  | 24 | 0.00 | 0.90 | 0.00 | -0.01 | -0.04 | -0.11 |
| MICAL2   | 15.8    | 2.9 | 1.56E-07  | 24 | 0.00 | 0.88 | 0.00 | -0.41 | -0.69 | -0.47 |
| CFB      | 79.0    | 4.1 | 1.22E-09  | 72 | 0.01 | 0.96 | 0.00 | 0.14  | 0.08  | 0.13  |
| NUB1     | 102.0   | 4.7 | 1.01E-07  | 72 | 0.01 | 0.58 | 0.00 | -0.06 | 0.13  | 0.07  |
| BATF3    | 7.3     | 1.8 | 1.59E-06  | 72 | 0.16 | 1.05 | 0.00 | -0.04 | 0.26  | 0.12  |
| RUSC2    | 29.8    | 3.3 | 0.000102  | 72 | 0.06 | 0.84 | 0.00 | 0.27  | -0.06 | 0.21  |
| ACSF2    | 33.5    | 3.8 | 8.72E-08  | 72 | 0.08 | 1.19 | 0.00 | -0.06 | 0.14  | -0.04 |
| MX2      | 27.5    | 3.3 | 2.62E-06  | 72 | 0.02 | 0.72 | 0.00 |       |       |       |
| PGPEP1   | 45.5    | 4.2 | 2.23E-07  | 72 | 0.02 | 1.25 | 0.00 | 0.00  | 0.16  | 0.11  |
| APOBEC3G | 26.5    | 3.4 | 6.73E-08  | 72 | 0.00 | 0.54 | 0.00 | -0.31 | 0.01  | -0.18 |
| PBXIP1   | 21.0    | 3.0 | 0.000002  | 72 | 0.15 | 1.09 | 0.00 |       |       |       |
| PTPRF    | 6.5     | 2.2 | 2.61E-08  | 24 | 0.01 | 1.17 | 0.00 |       | -0.35 | -0.39 |
| CD40     | 138.8   | 4.7 | 1.79E-08  | 72 | 0.00 | 0.81 | 0.00 | -0.15 | -0.06 | -0.10 |
| PSME1    | 108.7   | 4.8 | 0.0000834 | 72 | 0.01 | 0.72 | 0.00 | -0.48 | -0.03 | -0.12 |
| ITGB3    | 34.2    | 3.9 | 2.93E-08  | 24 | 0.00 | 1.25 | 0.00 |       | -0.01 | 0.12  |
| TBXAS1   | 82.9    | 4.6 | 1.99E-10  | 72 | 0.01 | 1.57 | 0.00 |       |       |       |
| XRN1     | 16.3    | 2.7 | 0.000454  | 24 | 0.01 | 0.84 | 0.00 |       |       |       |
| NUP85    | 15.0    | 2.9 | 0.0000468 | 72 | 0.00 | 1.30 | 0.00 | -0.38 | -0.50 | -0.23 |
| FARP1    | 51.6    | 4.2 | 5.14E-08  | 72 | 0.00 | 1.28 | 0.00 | 0.06  | -0.02 | -0.01 |
| ASB6     | 18.9    | 3.0 | 0.0000737 | 72 | 0.13 | 0.77 | 0.00 | 0.09  | 0.07  | 0.17  |
| SLC46A3  | 38.0    | 3.7 | 0.000634  | 72 | 0.04 | 1.10 | 0.00 | -0.22 | -0.21 | -0.15 |
| OSM      | 37.4    | 3.4 | 6.3E-07   | 72 | 0.11 | 1.05 | 0.00 | -0.07 | 0.03  | 0.00  |
| MTF1     | 65.7    | 3.9 | 3.65E-09  | 72 | 0.06 | 1.05 | 0.00 | 0.01  | -0.06 | -0.04 |
| CXCL5    | 1,254.9 | 7.7 | 3.34E-09  | 24 | 0.02 | 1.12 | 0.00 |       |       |       |
| BCS1L    | 9.9     | 2.2 | 0.000455  | 24 | 0.01 | 1.35 | 0.00 | -0.04 | -0.01 | 0.11  |
| PARP10   | 66.7    | 4.3 | 3.1E-07   | 72 | 0.01 | 0.81 | 0.00 | -0.03 | 0.02  | 0.37  |
| CD180    | 6.3     | 1.7 | 1.04E-09  | 72 | 0.05 | 1.57 | 0.00 | -0.51 |       | -0.37 |
| FAM129B  | 197.1   | 5.7 | 2.13E-08  | 24 | 0.02 | 0.95 | 0.00 | 0.15  | -0.09 | 0.15  |
| APBB2    | 32.3    | 3.5 | 7.87E-10  | 24 | 0.07 | 0.88 | 0.00 | 0.00  | 0.05  | 0.04  |
| DRAM2    | 62.0    | 4.3 | 0.0000149 | 72 | 0.06 | 1.31 | 0.00 | -0.19 | -0.06 | -0.06 |
| IFI44    | 57.9    | 4.1 | 6.81E-07  | 72 | 0.01 | 0.88 | 0.00 | -0.34 | -0.07 | -0.09 |
| PNPLA1   | 4.8     | 0.0 | 7.32E-07  | 72 | 0.15 | 1.07 | 0.00 | -0.18 | -0.37 |       |
| TBC1D8   | 30.9    | 3.4 | 0.0000136 | 24 | 0.06 | 1.11 | 0.00 | 0.22  | 0.07  | 0.18  |
| KIAA0040 | 7.9     | 2.2 | 4.27E-08  | 72 | 0.07 | 0.69 | 0.00 | -0.24 | -0.15 | -0.05 |
| H2AFY    | 234.0   | 5.6 | 0.0013    | 72 | 0.06 | 1.26 | 0.00 | -0.28 | -0.29 | -0.30 |
| CLEC2D   | 10.8    | 2.1 | 3.06E-06  | 72 | 0.01 | 0.97 | 0.00 | -0.28 | 0.33  | 0.17  |
| IGSF6    | 201.4   | 5.4 | 3.32E-08  | 24 | 0.16 | 1.10 | 0.00 | -0.35 | -0.32 | -0.43 |
| BAK1     | 63.6    | 4.2 | 0.0000566 | 24 | 0.03 | 0.74 | 0.00 | 0.22  | 0.09  | 0.23  |
| VAMP5    | 10.8    | 2.0 | 4.65E-06  | 72 | 0.06 | 0.48 | 0.00 | -0.21 | -0.15 | -0.19 |
| LAMB3    | 6.0     | 2.1 | 2.13E-08  | 24 | 0.06 | 0.86 | 0.00 |       | 0.04  | 0.10  |
| PSME2    | 115.0   | 4.9 | 1.72E-08  | 72 | 0.00 | 0.58 | 0.00 | -0.32 | -0.06 | -0.21 |
| ELMO2    | 43.5    | 4.0 | 0.0000164 | 24 | 0.04 | 0.86 | 0.00 | -0.18 | -0.07 | -0.02 |
| TREM2    | 160.4   | 5.2 | 4.36E-09  | 72 | 0.14 | 0.95 | 0.00 | 0.01  | 0.13  | 0.07  |
| CASC4    | 49.5    | 4.1 | 0.0000151 | 72 | 0.05 | 1.19 | 0.00 | 0.04  | 0.26  | 0.12  |
| ARHGAP10 | 64.4    | 4.4 | 4.59E-08  | 24 | 0.07 | 0.76 | 0.00 | -0.18 | -0.42 | -0.19 |
| TOR1B    | 83.8    | 4.5 | 6.92E-06  | 72 | 0.05 | 0.78 | 0.00 | -0.16 | 0.21  | 0.07  |
| GBP2     | 462.3   | 5.6 | 1.46E-06  | 72 | 0.08 | 0.78 | 0.00 | 0.14  | -0.09 | 0.01  |
| CASP8    | 10.2    | 2.3 | 0.0000143 | 72 | 0.06 | 1.26 | 0.00 | -0.09 | 0.19  | 0.01  |
| RNF213   | 167.9   | 5.3 | 8.5E-10   | 72 | 0.00 | 0.74 | 0.00 | -0.09 | -0.17 | -0.12 |
| DOCK4    | 67.4    | 4.2 | 2.92E-07  | 72 | 0.04 | 0.95 | 0.00 | 0.11  | -0.18 | 0.05  |
| CBX6     | 8.6     | 2.2 | 2.93E-07  | 24 | 0.01 | 0.80 | 0.00 |       |       |       |
| ERCC2    | 9.4     | 2.3 | 4.96E-07  | 72 | 0.06 | 1.25 | 0.00 | -0.20 | -0.07 | -0.11 |
| OAS1     | 172.4   | 5.4 | 1.47E-06  | 72 | 0.03 | 0.72 | 0.00 | -0.23 | -0.03 | -0.02 |
| SPOCD1   | 98.4    | 4.9 | 0.0000285 | 24 | 0.01 | 0.86 | 0.00 | 0.13  | 0.06  | -0.01 |
| AMDHD2   | 31.6    | 3.5 | 2.76E-09  | 24 | 0.03 | 1.09 | 0.00 | 0.30  | 0.37  | 0.24  |

|          |         |     |           |    |      |      |      |       |       |       |
|----------|---------|-----|-----------|----|------|------|------|-------|-------|-------|
| TMEM223  | 11.4    | 2.2 | 0.0000137 | 24 | 0.15 | 1.19 | 0.00 | -0.37 | 0.13  | 0.07  |
| HSD3B7   | 184.4   | 5.4 | 0.0000143 | 72 | 0.09 | 0.90 | 0.00 | 0.10  | 0.33  | 0.24  |
| DPP4     | 6.7     | 1.8 | 2.35E-10  | 24 | 0.02 | 1.11 | 0.00 |       | -0.22 | -0.34 |
| SLC25A22 | 11.4    | 2.5 | 0.000169  | 24 | 0.08 | 0.78 | 0.01 | -0.04 | 0.18  | 0.29  |
| MRPS6    | 348.0   | 5.7 | 1.79E-08  | 24 | 0.03 | 0.87 | 0.01 | 0.30  | 0.12  | 0.20  |
| NLRP3    | 8.3     | 2.1 | 1.81E-07  | 24 | 0.11 | 0.97 | 0.01 | -0.10 | -0.31 | -0.07 |
| PPARD    | 100.7   | 4.8 | 8.12E-09  | 24 | 0.08 | 0.93 | 0.01 | -0.18 | -0.24 | -0.09 |
| AMPD3    | 51.3    | 4.0 | 3.19E-08  | 72 | 0.05 | 1.15 | 0.01 | -0.15 | -0.12 | -0.01 |
| CLCN4    | 15.4    | 3.0 | 2.65E-08  | 72 | 0.04 | 1.24 | 0.01 | -0.05 | -0.04 | -0.05 |
| MCTP1    | 33.4    | 3.5 | 0.0000332 | 72 | 0.04 | 0.73 | 0.01 | -0.29 | -0.20 | -0.13 |
| HAPLN3   | 8.7     | 0.8 | 4.63E-07  | 72 | 0.08 | 0.91 | 0.01 | -0.10 | -0.12 | -0.10 |
| UBE2L6   | 94.3    | 4.6 | 2.4E-08   | 72 | 0.01 | 0.77 | 0.01 | -0.37 | -0.22 | -0.21 |
| TSMF     | 20.6    | 3.4 | 3.76E-08  | 24 | 0.01 | 0.87 | 0.01 | -0.44 | -0.16 | -0.15 |
| BST2     | 256.5   | 5.7 | 0.0000109 | 72 | 0.03 | 0.73 | 0.01 | -0.10 | 0.16  | 0.10  |
| ZDHC7    | 53.2    | 4.0 | 0.000144  | 24 | 0.01 | 1.28 | 0.01 | -0.19 | -0.30 | -0.28 |
| ICK      | 11.8    | 2.6 | 0.00417   | 24 | 0.07 | 1.26 | 0.01 | -0.23 | -0.13 | -0.10 |
| HAMP     | 8.0     | 2.3 | 1.34E-09  | 72 | 0.04 | 0.95 | 0.01 |       |       | 0.01  |
| MMP12    | 17.6    | 2.5 | 1.09E-09  | 72 | 0.01 | 0.93 | 0.01 |       | -0.38 | -0.41 |
| MATK     | 65.8    | 4.1 | 6.66E-08  | 24 | 0.04 | 0.88 | 0.01 |       | 0.33  | 0.23  |
| LAMP3    | 7.0     | 1.6 | 1.65E-06  | 72 | 0.04 | 0.90 | 0.01 |       | 0.12  | -0.03 |
| CY5R3    | 5.3     | 0.9 | 8.36E-08  | 72 | 0.03 | 1.29 | 0.01 |       | -0.23 | -0.16 |
| PDGFB    | 6.3     | 1.5 | 0.000159  | 24 | 0.15 | 0.71 | 0.01 | 0.12  | 0.18  | 0.13  |
| SLC45A3  | 4.8     | 2.0 | 2.17E-06  | 72 | 0.11 | 1.04 | 0.01 |       | -0.13 | -0.03 |
| GYPC     | 119.8   | 4.9 | 0.00144   | 72 | 0.04 | 0.67 | 0.01 | 0.12  | 0.16  | 0.06  |
| ANGEL1   | 51.7    | 3.8 | 6.66E-09  | 24 | 0.13 | 1.10 | 0.01 | 0.05  | 0.28  | 0.26  |
| ITGA5    | 298.8   | 5.9 | 4.52E-08  | 24 | 0.02 | 0.73 | 0.01 | 0.17  | 0.04  | 0.23  |
| APOO     | 16.4    | 3.1 | 2.75E-07  | 72 | 0.06 | 0.64 | 0.01 | 0.19  | 0.13  | 0.14  |
| ITGB8    | 230.3   | 5.1 | 0.0000014 | 72 | 0.15 | 1.24 | 0.01 | -0.19 | -0.46 | -0.15 |
| ARHGAP35 | 38.6    | 3.8 | 0.0000947 | 72 | 0.02 | 1.43 | 0.01 | 0.30  | 0.16  | 0.20  |
| MT1H     | 86.0    | 3.3 | 1.12E-07  | 72 | 0.13 | 0.62 | 0.01 | -0.25 | -0.05 | -0.22 |
| MMP2     | 11.8    | 3.1 | 2.1E-08   | 72 | 0.04 | 1.19 | 0.01 |       | -0.17 | -0.22 |
| CCL22    | 547.4   | 6.5 | 1.76E-09  | 72 | 0.10 | 0.77 | 0.01 | -0.16 | -0.15 | -0.06 |
| SLIT3    | 6.4     | 1.9 | 0.0000322 | 72 | 0.06 | 1.16 | 0.01 |       | 0.21  | 0.27  |
| PSMA2    | 92.6    | 4.6 | 0.000525  | 72 | 0.02 | 0.73 | 0.01 | -0.24 | -0.15 | -0.16 |
| ITGAE    | 8.5     | 2.2 | 0.000433  | 72 | 0.13 | 1.56 | 0.01 | 0.06  | -0.09 | -0.09 |
| CCDC71L  | 24.6    | 3.6 | 6.28E-09  | 24 | 0.00 | 0.83 | 0.01 | -0.29 | -0.14 | -0.17 |
| SWAP70   | 106.1   | 4.8 | 0.00187   | 72 | 0.13 | 1.25 | 0.01 | -0.08 | -0.25 | -0.02 |
| RCSD1    | 19.3    | 3.1 | 6.23E-08  | 72 | 0.04 | 1.89 | 0.01 | -0.16 | -0.31 | -0.11 |
| CNP      | 76.2    | 4.4 | 0.0000168 | 72 | 0.04 | 0.60 | 0.01 | 0.49  | 0.26  | 0.40  |
| SLC46A2  | 5.2     | 1.0 | 5.7E-07   | 24 | 0.04 | 1.34 | 0.01 | 0.17  | 0.13  | 0.07  |
| RHDF2    | 39.8    | 3.8 | 0.000919  | 72 | 0.06 | 0.92 | 0.02 | -0.50 | -0.47 | -0.18 |
| TNFRSF4  | 5.3     | 0.0 | 4.52E-07  | 72 | 0.01 | 1.17 | 0.02 |       | 0.01  | 0.12  |
| SLC28A3  | 18.8    | 2.7 | 2.66E-08  | 24 | 0.06 | 1.15 | 0.02 | -0.19 | -0.05 | 0.02  |
| PSMB8    | 44.0    | 3.7 | 0.0107    | 72 | 0.08 | 0.81 | 0.02 | -0.37 | -0.42 | -0.27 |
| PNPT1    | 39.5    | 3.9 | 3.96E-08  | 72 | 0.01 | 0.46 | 0.02 | 0.08  | 0.44  | 0.21  |
| NAIP     | 17.5    | 3.0 | 5.24E-09  | 72 | 0.03 | 1.33 | 0.02 | -0.01 | 0.02  | -0.03 |
| RFTN1    | 24.8    | 3.4 | 7.67E-07  | 72 | 0.00 | 0.76 | 0.02 | -0.24 | -0.18 | 0.00  |
| PPARGC1B | 20.9    | 3.2 | 0.0000157 | 72 | 0.08 | 0.99 | 0.02 | -0.12 | -0.04 | 0.07  |
| LILRA5   | 9.9     | 2.5 | 1.02E-07  | 72 | 0.16 | 1.22 | 0.02 | -0.36 |       | -0.26 |
| PTGS1    | 23.0    | 3.5 | 6.68E-06  | 72 | 0.00 | 1.28 | 0.02 | 0.14  | 0.05  | 0.10  |
| TRIM56   | 12.9    | 2.7 | 1.07E-06  | 72 | 0.11 | 0.91 | 0.02 | -0.05 | -0.42 | -0.08 |
| IL1RN    | 1,556.9 | 6.8 | 3.45E-08  | 72 | 0.07 | 1.11 | 0.02 | 0.11  | -0.01 | -0.08 |
| SGSH     | 16.1    | 3.0 | 0.000236  | 72 | 0.01 | 1.27 | 0.02 | -0.23 | -0.27 | -0.20 |
| CTNS     | 48.4    | 4.1 | 4.59E-08  | 24 | 0.10 | 0.86 | 0.02 | -0.25 | -0.49 | -0.41 |
| LACC1    | 20.0    | 2.9 | 0.00669   | 72 | 0.08 | 1.23 | 0.02 | -0.25 | -0.27 | -0.20 |
| ABCA5    | 7.1     | 2.2 | 0.0202    | 24 | 0.13 | 0.96 | 0.02 | -0.06 | -0.06 | -0.07 |
| CD84     | 209.2   | 5.2 | 6.51E-07  | 24 | 0.05 | 0.95 | 0.02 | -0.12 | -0.03 | -0.07 |
| KCNJ5    | 12.9    | 3.0 | 6.4E-09   | 72 | 0.00 | 1.13 | 0.02 | -0.08 |       | 0.17  |
| MFAP5    | 6.6     | 1.9 | 5.52E-07  | 72 | 0.04 | 1.21 | 0.02 |       | -0.22 | -0.30 |
| LMNB1    | 6.0     | 1.6 | 5.57E-07  | 24 | 0.05 | 0.66 | 0.02 | -0.59 | -0.40 | -0.28 |
| TGFA     | 6.8     | 1.9 | 1.37E-10  | 24 | 0.03 | 0.80 | 0.02 |       | -0.23 | -0.21 |
| ABHD12   | 155.5   | 5.3 | 1.66E-09  | 72 | 0.02 | 1.23 | 0.03 | -0.03 | 0.38  | 0.13  |
| TRIB2    | 6.9     | 1.9 | 6.73E-11  | 24 | 0.02 | 0.95 | 0.03 |       | 0.06  | -0.03 |
| NUP188   | 120.2   | 5.1 | 0.00163   | 24 | 0.01 | 0.80 | 0.03 | -0.03 | 0.09  | 0.12  |
| ITGAX    | 326.7   | 5.9 | 0.0000359 | 72 | 0.14 | 0.93 | 0.03 |       |       |       |
| GALM     | 13.9    | 3.1 | 2.83E-07  | 72 | 0.13 | 1.25 | 0.03 | -0.13 | -0.09 | -0.17 |
| HIPK2    | 341.0   | 6.1 | 5.38E-07  | 72 | 0.12 | 1.48 | 0.03 | 0.19  | -0.06 | 0.06  |
| TNFSF15  | 7.1     | 1.9 | 5.19E-08  | 24 | 0.15 | 1.04 | 0.03 | -0.10 | -0.13 | -0.12 |
| RASSF2   | 6.1     | 2.3 | 7.88E-06  | 72 | 0.09 | 1.13 | 0.03 |       | -0.73 | -0.34 |

|              |         |     |           |    |      |      |      |       |       |       |
|--------------|---------|-----|-----------|----|------|------|------|-------|-------|-------|
| C1S          | 53.4    | 4.4 | 5E-08     | 72 | 0.01 | 0.83 | 0.03 |       | -0.16 | -0.19 |
| ZNF641       | 8.1     | 2.2 | 0.042     | 24 | 0.15 | 1.39 | 0.03 | 0.03  | -0.18 | 0.17  |
| NPC2         | 587.8   | 6.7 | 0.000176  | 72 | 0.16 | 1.09 | 0.03 | -0.36 | -0.07 | -0.18 |
| TRAPPC5      | 40.6    | 3.9 | 0.00295   | 24 | 0.16 | 1.04 | 0.03 | -0.18 | 0.11  | 0.03  |
| LPCAT1       | 47.7    | 4.1 | 0.0000412 | 24 | 0.16 | 1.12 | 0.03 | 0.03  | 0.04  | 0.04  |
| JAK3         | 6.3     | 1.8 | 2.98E-07  | 72 | 0.06 | 1.11 | 0.03 |       | -0.12 | 0.03  |
| ZNF710       | 27.0    | 3.3 | 0.000012  | 72 | 0.14 | 1.18 | 0.03 | -0.22 | -0.28 | -0.20 |
| RCN1         | 68.0    | 4.3 | 0.000156  | 72 | 0.11 | 0.79 | 0.03 | -0.20 | -0.20 | -0.10 |
| RNF130       | 693.2   | 6.4 | 0.000235  | 24 | 0.15 | 1.15 | 0.04 | -0.09 | 0.30  | 0.10  |
| GAS7         | 49.0    | 4.2 | 2.95E-08  | 72 | 0.08 | 1.23 | 0.04 | -0.02 | 0.02  | -0.08 |
| MCOLN2       | 11.0    | 2.2 | 0.0000013 | 72 | 0.16 | 0.97 | 0.04 | -0.34 | -0.19 | -0.26 |
| RSPO3        | 14.2    | 2.2 | 1.65E-09  | 24 | 0.06 | 0.88 | 0.04 | -0.24 | -0.34 | -0.31 |
| GNA15        | 114.6   | 5.1 | 0.0000263 | 24 | 0.10 | 0.83 | 0.04 | -0.08 | -0.47 | -0.13 |
| ARNTL2       | 18.5    | 3.3 | 0.000489  | 24 | 0.03 | 1.14 | 0.04 |       | -0.42 | -0.21 |
| MOV10        | 18.3    | 3.2 | 0.0000126 | 72 | 0.03 | 0.81 | 0.04 | -0.24 | -0.19 | 0.08  |
| GPNMB        | 4,056.6 | 8.0 | 1.09E-07  | 24 | 0.04 | 1.28 | 0.04 | 0.01  | 0.39  | 0.09  |
| VGLL4        | 16.9    | 2.8 | 0.00157   | 24 | 0.06 | 1.35 | 0.04 | -0.15 | -0.31 | -0.07 |
| CD226        | 10.5    | 2.5 | 3.78E-08  | 24 | 0.07 | 0.90 | 0.05 | -0.18 | -0.05 | -0.27 |
| ADAR         | 412.2   | 6.2 | 0.0000332 | 72 | 0.03 | 0.75 | 0.05 | -0.24 | -0.14 | -0.15 |
| CYBRD1       | 6.3     | 2.2 | 6.54E-08  | 72 | 0.16 | 1.12 | 0.05 |       |       | 0.01  |
| TRIM5        | 28.8    | 3.5 | 4.52E-06  | 72 | 0.07 | 0.75 | 0.05 | 0.17  | 0.16  | 0.24  |
| NOTCH2       | 203.9   | 5.5 | 1.71E-06  | 72 | 0.11 | 1.10 | 0.05 | 0.24  | -0.09 | 0.05  |
| PXN          | 30.6    | 3.0 | 3.83E-07  | 24 | 0.15 | 0.73 | 0.05 |       |       |       |
| SBNO2        | 56.0    | 4.3 | 2.4E-07   | 24 | 0.06 | 0.86 | 0.05 | 0.11  | -0.19 | 0.12  |
| RBP1         | 19.1    | 3.6 | 2.44E-08  | 72 | 0.08 | 1.12 | 0.05 |       | 0.06  | 0.03  |
| CADM1        | 9.9     | 2.6 | 2.76E-09  | 72 | 0.12 | 1.27 | 0.05 |       | 0.03  | 0.05  |
| MTHFD1       | 97.8    | 4.7 | 0.000523  | 72 | 0.07 | 0.78 | 0.06 | -0.10 | 0.14  | -0.10 |
| PDE4A        | 59.1    | 4.1 | 6.74E-06  | 72 | 0.08 | 0.81 | 0.06 | 0.03  | 0.17  | 0.32  |
| LOC100129034 | 270.9   | 5.7 | 0.000237  | 24 | 0.14 | 0.76 | 0.06 | 0.19  | 0.20  | 0.17  |
| LPAR1        | 56.3    | 4.4 | 0.00499   | 24 | 0.03 | 0.89 | 0.06 | -0.01 | -0.08 | -0.12 |
| TPD52        | 12.0    | 2.5 | 4.66E-06  | 72 | 0.13 | 0.86 | 0.06 | -0.20 | 0.05  | -0.32 |
| TMEM132A     | 6.1     | 1.9 | 1.46E-08  | 72 | 0.13 | 1.11 | 0.06 |       | -0.33 | 0.03  |
| AIM2         | 5.3     | 1.1 | 3.95E-06  | 72 | 0.02 | 0.93 | 0.06 |       | -0.18 | -0.20 |
| HLX          | 23.6    | 3.4 | 4.65E-08  | 24 | 0.03 | 0.85 | 0.06 |       |       |       |
| PFKP         | 35.5    | 3.5 | 0.0000025 | 72 | 0.11 | 0.92 | 0.07 | -0.07 | -0.12 | 0.02  |
| LRP12        | 9.6     | 2.6 | 0.0000232 | 24 | 0.07 | 1.06 | 0.07 |       | -0.44 | -0.26 |
| SGSM2        | 26.0    | 3.5 | 3.65E-06  | 72 | 0.10 | 1.29 | 0.08 | -0.05 | 0.22  | 0.19  |
| TPCN1        | 10.0    | 2.9 | 1.03E-08  | 72 | 0.01 | 1.11 | 0.08 |       | 0.01  | -0.18 |
| PRDM1        | 20.6    | 3.3 | 0.0139    | 24 | 0.16 | 0.84 | 0.08 | -0.07 | 0.09  | 0.16  |
| PLEKHO1      | 26.5    | 3.7 | 0.0000657 | 72 | 0.01 | 0.87 | 0.08 | -0.20 | -0.37 | -0.32 |
| TNS1         | 41.0    | 4.2 | 1.04E-09  | 72 | 0.03 | 1.24 | 0.08 | -0.03 | -0.16 | 0.03  |
| GBP3         | 54.5    | 3.5 | 0.0000341 | 72 | 0.07 | 0.79 | 0.10 | -0.11 | -0.06 | -0.03 |
| CLU10S       | 5.7     | 1.7 | 0.0000525 | 24 | 0.06 | 0.98 | 0.10 |       | -0.17 | -0.18 |
| CSF2RB       | 191.4   | 5.0 | 1.19E-07  | 72 | 0.14 | 0.76 | 0.10 | -0.05 | -0.13 | 0.00  |
| ARHGAP9      | 35.5    | 3.5 | 3.01E-08  | 72 | 0.07 | 1.31 | 0.11 | -0.27 | -0.28 | -0.09 |
| OCSTAMP      | 10.1    | 1.6 | 2.52E-09  | 24 | 0.01 | 1.09 | 0.11 |       | 0.08  | 0.11  |
| ACVR1B       | 67.9    | 4.3 | 0.0000198 | 72 | 0.07 | 0.78 | 0.12 | -0.25 | 0.07  | -0.03 |
| PCYOX1       | 25.7    | 3.0 | 1.03E-07  | 24 | 0.14 | 1.10 | 0.12 |       |       |       |
| NMI          | 22.1    | 3.1 | 1.85E-06  | 72 | 0.14 | 0.88 | 0.13 | -0.36 | -0.16 | -0.18 |
| RARRES3      | 40.0    | 2.8 | 0.085     | 24 | 0.14 | 0.54 | 0.14 | -0.26 | -0.08 | -0.13 |
| SAMHD1       | 235.3   | 5.7 | 0.000117  | 72 | 0.10 | 1.27 | 0.14 | -0.55 | -0.10 | -0.12 |
| SDS          | 6.5     | 0.7 | 0.000019  | 24 | 0.07 | 1.26 | 0.14 |       |       | -0.20 |
| ANTXR2       | 14.8    | 2.8 | 0.000219  | 24 | 0.12 | 0.92 | 0.15 |       |       |       |
| LILRB2       | 43.6    | 3.9 | 7.74E-06  | 72 | 0.13 | 1.53 | 0.16 | -0.02 | -0.20 | -0.14 |
| MAP7         | 42.9    | 3.6 | 1.47E-06  | 72 | 0.13 | 0.99 | 0.18 | 0.31  | 0.24  | 0.07  |
| APOL3        | 49.3    | 3.9 | 1.09E-06  | 72 | 0.07 | 0.52 | 0.18 | -0.06 | 0.00  | -0.06 |
| PDCD1LG2     | 86.0    | 4.7 | 1.54E-06  | 72 | 0.15 | 0.67 | 0.19 | -0.36 | -0.20 | -0.15 |
| CCL2         | 120.7   | 4.6 | 6.06E-09  | 24 | 0.16 | 0.95 | 0.23 | -0.31 | -0.01 | -0.33 |
| LCP2         | 123.7   | 4.9 | 3.39E-06  | 24 | 0.08 | 0.78 | 0.23 | -0.36 | -0.35 | -0.17 |
| C1R          | 8.7     | 2.4 | 0.0000203 | 72 | 0.04 | 0.77 | 0.34 |       | -0.24 | -0.16 |
| IFITM2       | 23.7    | 2.9 | 0.000525  | 72 | 0.13 | 0.78 | 0.35 | -0.20 | -0.12 | -0.11 |
| INPP5F       | 15.3    | 2.9 | 0.00261   | 72 | 0.14 | 0.71 | 0.36 | -0.32 | -0.40 | -0.32 |
| CD38         | 31.5    | 4.0 | 0.000548  | 72 | 0.08 | 0.72 | 0.43 | -0.25 | 0.06  | 0.06  |
