# Supplementary material for: Human alveolar macrophage response to Mycobacterium tuberculosis: immune characteristics underlying large inter-individual variability
Source: Research Square preprint supplement (doi:10.21203/rs.3.rs-2986649/v1), 2023-06-08
Supplement: Supplementary file 10 [file b4d91756e49e3ccf9fd45dae.pdf]

**A**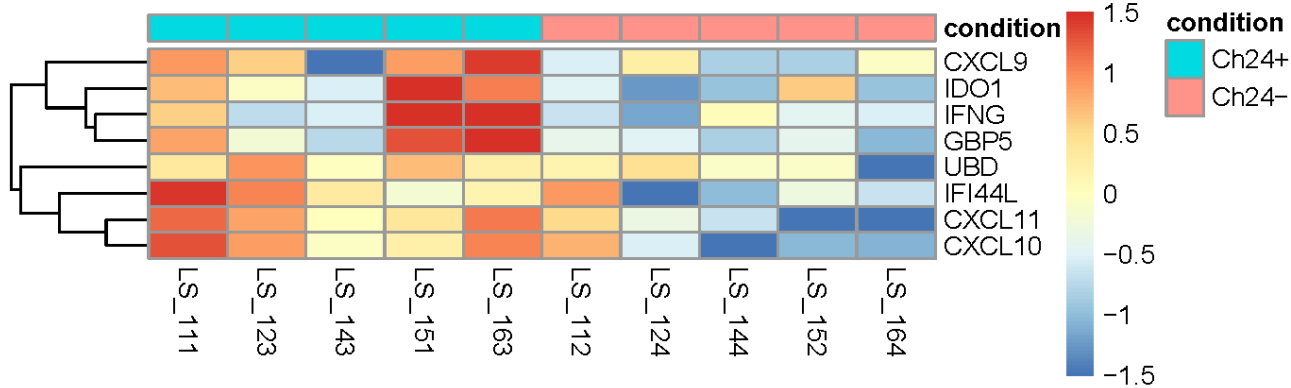**B**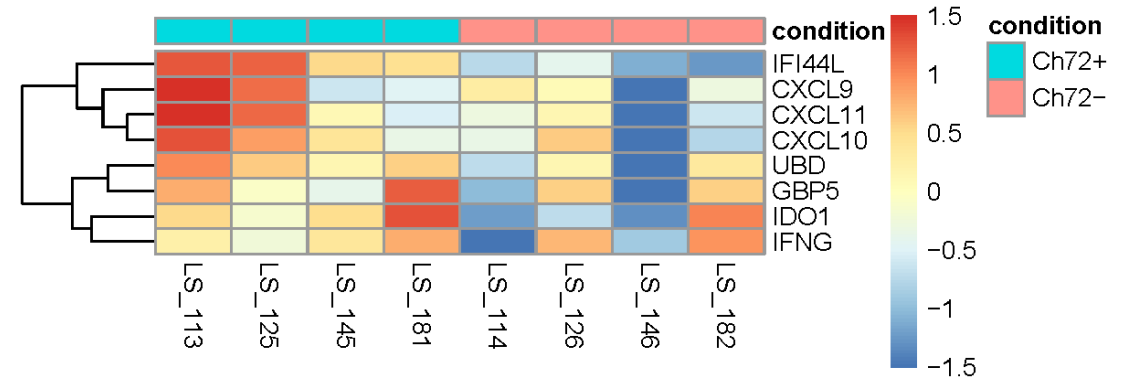

**Additional file 15: Supplementary Fig. 5. Expression of IDO1 and its co-expressed genes in AMs infected with *M.tb* at 24h (Panel A) and 72h (Panel B) in South Africa cohort samples.** A Z-score normalization was performed on the normalized read counts on the log<sub>2</sub> scale across samples for each gene. Ch24+, control healthy subjects infected with *M.tb* for 24h; Ch24-, uninfected control healthy subjects for 24h; Ch72+, control healthy subjects infected with *M.tb* for 72h; Ch72-, uninfected control healthy subjects for 72h.
