# Supplementary material for: Human alveolar macrophage response to Mycobacterium tuberculosis: immune characteristics underlying large inter-individual variability
Source: Research Square preprint supplement (doi:10.21203/rs.3.rs-2986649/v1), 2023-06-08
Supplement: Supplementary file 11 [file b9bd3e3ada5e529e6606d375.pdf]

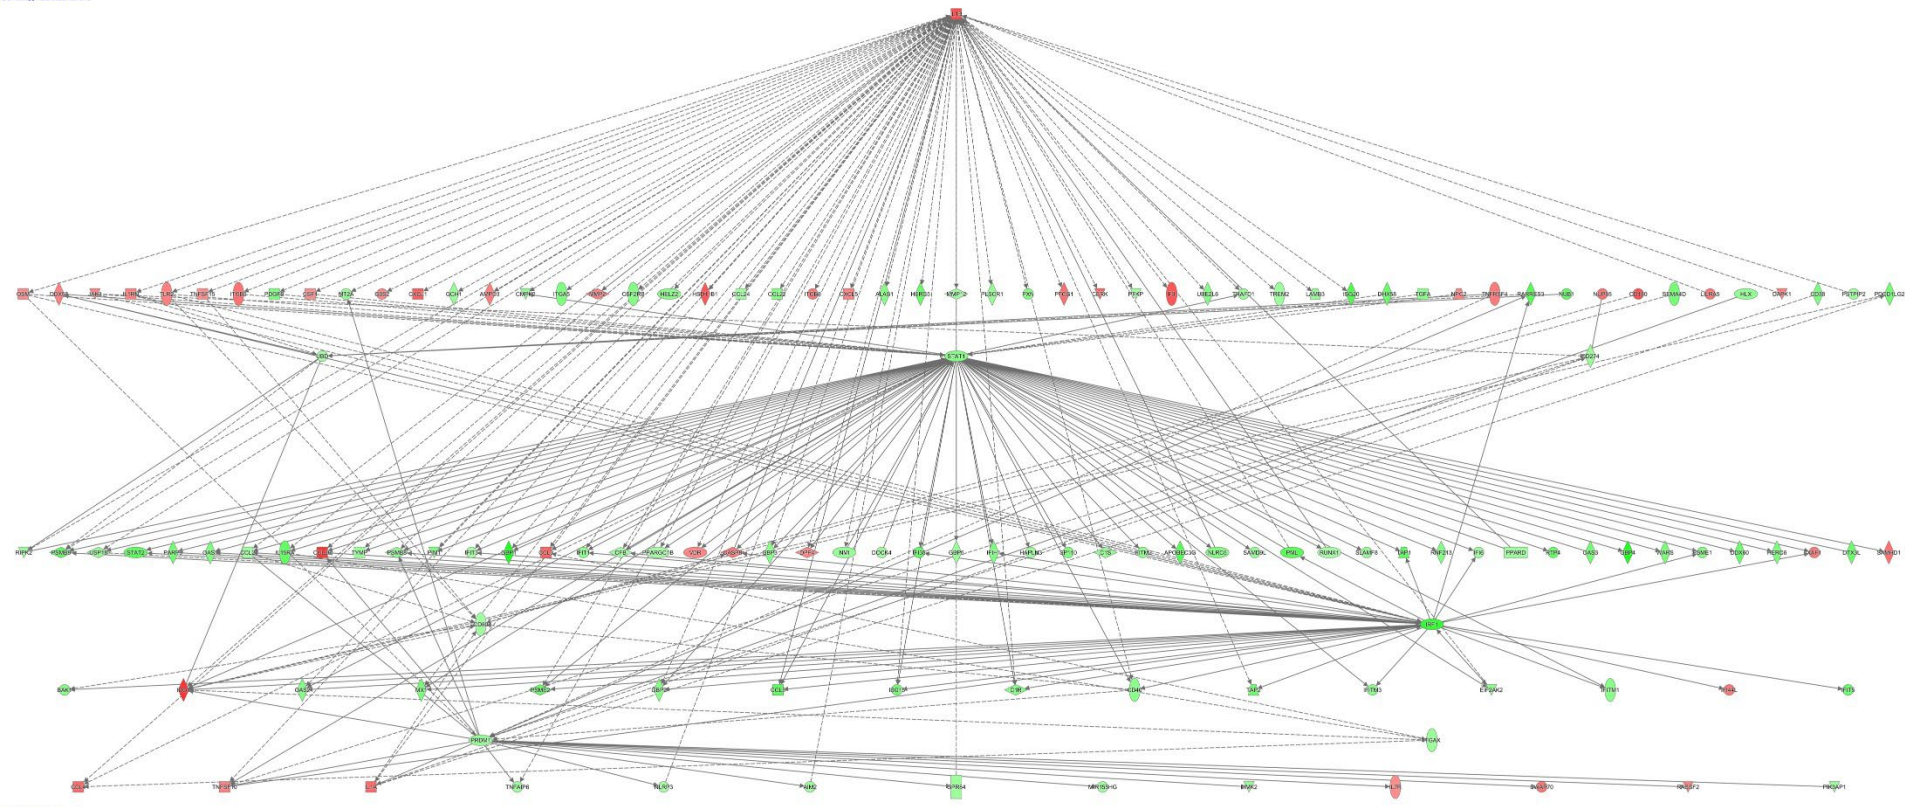

**Additional file 8: Supplementary Fig. 3. Top scoring network of DE genes with highly variable expression (VE/DE genes).** The Ingenuity Pathway Analysis (IPA) (<https://www.qiagenbioinformatics.com/products/ingenuity-pathway-analysis/>) of VE/DE genes (n=324) generates a top scoring gene network, with IL1B on top. The same pathway is shown in Figure 6, while this graph displays all gene names.
