# Supplementary material for: Human alveolar macrophage response to Mycobacterium tuberculosis: immune characteristics underlying large inter-individual variability
Source: Research Square preprint supplement (doi:10.21203/rs.3.rs-2986649/v1), 2023-06-08
Supplement: Supplementary file 12 [file cdbc4452a1357d79d5d06896.pdf]

**Additional file 10: Table S7. Summary of significant correlations between protein levels and gene modules in control and *M.tb*- infected AMs at 2, 24 and 72h.**

Significant module correlations with generation time are also indicated (blue, red, tan, yellow; 'yes'; column D). CCL3 is present in multiple modules. Negative correlations are highlighted in red. Adjusted p values reflect the number of proteins (n=27) and number of modules.

| Network      | Module     | Protein | Growth Rate | Correlation  | p value  |
|--------------|------------|---------|-------------|--------------|----------|
| 2h control   | purple     | CXCL5   | No          | 0.71720538   | 3.74E-05 |
| 2h control   | royalblue  | CCL3    | No          | 0.803094138  | 7.89E-07 |
| 2h control   | royalblue  | IL6     | No          | 0.760285808  | 6.58E-06 |
| 2h infected  | darkred    | CCL19   | No          | 0.794648468  | 1.25E-06 |
| 2h infected  | lightcyan  | IL1B    | No          | 0.786457043  | 1.90E-06 |
| 2h infected  | purple     | CXCL5   | No          | 0.740813659  | 1.50E-05 |
| 2h infected  | royalblue  | CCL3    | No          | 0.78146984   | 2.44E-06 |
| 24h control  | darkgreen  | IL1B    | No          | -0.741845421 | 1.44E-05 |
| 24h control  | yellow     | IL16    | No          | 0.733784429  | 1.99E-05 |
| 24h infected | blue       | CCL3    | No          | 0.767235062  | 4.81E-06 |
| 24h infected | blue       |         | Yes         | -0.521591493 | 0.00628  |
| 24h infected | darkorange | CCL3    | No          | 0.728430885  | 2.45E-05 |
| 24h infected | green      | CCL13   | No          | -0.742658317 | 1.39E-05 |
| 24h infected | green      | IL15    | No          | -0.770469814 | 4.14E-06 |
| 24h infected | lightcyan  | CCL3    | No          | -0.706304363 | 5.52E-05 |
| 24h infected | orange     | IL10    | No          | 0.783608785  | 2.20E-06 |
| 24h infected | red        | CCL3    | No          | 0.796979009  | 1.10E-06 |
| 24h infected | red        | IL10    | No          | -0.723175818 | 2.99E-05 |
| 24h infected | red        |         | Yes         | -0.545775692 | 0.00393  |
| 24h infected | salmon     | CCL3    | No          | 0.754510651  | 8.47E-06 |
| 24h infected | tan        |         | Yes         | 0.52391146   | 0.00601  |
| 24h infected | yellow     | CCL3    | No          | 0.756589968  | 7.74E-06 |
| 24h infected | yellow     |         | Yes         | -0.607881927 | 0.00099  |
| 72h control  | darkred    | CXCL10  | No          | 0.740180104  | 1.54E-05 |
| 72h infected | darkgrey   | MMP9    | No          | -0.726631475 | 2.63E-05 |
| 72h infected | grey       | IL15    | No          | -0.705979049 | 5.59E-05 |
| 72h infected | grey       | MMP9    | No          | -0.752202091 | 9.36E-06 |
| 72h infected | pink       | CSF2    | No          | 0.708702121  | 5.08E-05 |
| 72h infected | tan        | CCL19   | No          | 0.760456781  | 6.53E-06 |
| 72h infected | tan        | IL15    | No          | 0.758051202  | 7.26E-06 |
| 72h infected | tan        | IL18    | No          | 0.74201705   | 1.43E-05 |
| 72h infected | tan        | IL1A    | No          | 0.735941955  | 1.83E-05 |
| 72h infected | tan        | TNF     | No          | 0.78475801   | 2.07E-06 |
