# Supplementary material for: Human alveolar macrophage response to Mycobacterium tuberculosis: immune characteristics underlying large inter-individual variability
Source: Research Square preprint supplement (doi:10.21203/rs.3.rs-2986649/v1), 2023-06-08
Supplement: Supplementary file 13 [file cf1d85f411e6ab987f00fda4.pdf]

**Additional file 3: Table S3. Correlations between secreted proteins and *M.tb* generation time during the 48 to 72h incubation period (Protein vs. Growth Rate correlations).**

All values are r correlations, with + or – indicating whether the correlation is positive (longer generation time) or negative (shorter generation time).

| Proteins | 2 hours            |                    | 24 hours           |                    | 72 hours            |                    |
|----------|--------------------|--------------------|--------------------|--------------------|---------------------|--------------------|
|          | Correlation        | P value            | Correlation        | P value            | Correlation         | P value            |
| CCL13    | -0.269798907       | 0.164997643        | 0.116607257        | 0.554575598        | -0.038042855        | 0.847589272        |
| CCL17    | -0.189736519       | 0.333524203        | -0.13315372        | 0.499372514        | -0.118479635        | 0.548190947        |
| CCL19    | -0.162249431       | 0.409435731        | 0.014510437        | 0.94157931         | 0.090675281         | 0.64632014         |
| CCL2     | -0.125763967       | 0.523682421        | -0.088708655       | 0.653512603        | -0.179502829        | 0.360722617        |
| CCL20    | -0.011598741       | 0.95328794         | 0.099528036        | 0.614334604        | 0.083095613         | 0.674206354        |
| CCL22    | 0.14745636         | 0.453978085        | -0.150759632       | 0.443815193        | 0.008475681         | 0.965857001        |
| CCL3     | -0.091289125       | 0.644081468        | -0.351802057       | 0.066375664        | -0.180088968        | 0.359130416        |
| CCL4     | -0.097536894       | 0.621471487        | -0.172685176       | 0.379546837        | 0.03989901          | 0.840245085        |
| CSF2     | 0.022541329        | 0.909353867        | 0.047170389        | 0.811605944        | 0.075949646         | 0.700889194        |
| CXCL10   | -0.14337731        | 0.466696169        | -0.258870666       | 0.18346251         | 0.171539689         | 0.39225414         |
| CXCL5    | 0.174117717        | 0.375545053        | -0.137346456       | 0.485835291        | -0.142071993        | 0.47080493         |
| IL10     | <b>0.464049148</b> | <b>0.012865159</b> | <b>0.393425808</b> | <b>0.038333683</b> | 0.252052778         | 0.195686116        |
| IL15     | 0.184458395        | 0.347392628        | 0.1873198          | 0.339831925        | 0.253422209         | 0.19318697         |
| IL16     | -0.128356344       | 0.515089812        | -0.201869748       | 0.302940866        | -0.190212411        | 0.332290538        |
| IL18     | -0.056433721       | 0.775466605        | 0.094547856        | 0.632248173        | 0.106604149         | 0.589251949        |
| IL1A     | -0.065155879       | 0.741850468        | 0.072624308        | 0.713427637        | -0.043272443        | 0.826931387        |
| IL1B     | 0.331607713        | 0.084732403        | 0.190272179        | 0.332135798        | 0.085465254         | 0.665440752        |
| IL6      | 0.188968813        | 0.335520191        | -0.000521199       | 0.997899826        | 0.09767182          | 0.620986802        |
| IL7      | <b>0.57089279</b>  | <b>0.001510547</b> | 0.330189256        | 0.086153793        | <b>-0.413428132</b> | <b>0.028756169</b> |
| IL8      | -0.011749721       | 0.952680557        | -0.329045128       | 0.087313428        | -0.194322469        | 0.321751674        |
| MMP1     | -0.201048307       | 0.304954139        | -0.167362614       | 0.394629986        | 0.003287128         | 0.987017244        |
| MMP10    | 0.264383945        | 0.173975026        | <b>0.38989224</b>  | <b>0.040264065</b> | -0.354437259        | 0.064227859        |
| MMP2     | -0.19246302        | 0.326493896        | -0.271595113       | 0.162093559        | -0.277203961        | 0.161559406        |
| MMP3     | -0.098166397       | 0.619211484        | -0.14146752        | 0.472713978        | -0.277501114        | 0.152800973        |
| MMP9     | 0.253810327        | 0.210881697        | 0.140123432        | 0.485739551        | 0.081141386         | 0.687436088        |
| TNF      | 0.104608285        | 0.596281575        | 0.040772982        | 0.836791558        | 0.030800875         | 0.876357181        |
| VEGFA    | 0.304927897        | 0.114610458        | 0.12249261         | 0.534623327        | 0.205530419         | 0.294070293        |
