# Supplementary material for: Human alveolar macrophage response to Mycobacterium tuberculosis: immune characteristics underlying large inter-individual variability
Source: Research Square preprint supplement (doi:10.21203/rs.3.rs-2986649/v1), 2023-06-08
Supplement: Supplementary file 14 [file d2dbb5c998d9d14aa63c6115.pdf]

**Additional file 2: Table S2. Protein (n=27) levels secreted into the culture medium during 2, 24, and 72h incubation of uninfected AMs (Con) and after infection with M.tb from 0-2h incubation.** The incubation medium was changed once at 2h. Results are in picogram/ml, secreted into the medium by AMs over the incubation periods 0-2h, 2-24h, and 2-72h. Each value is the mean of results from duplicates of each of 2 independent samples per AM.

| Analytes              | D1.2h.Con | D1.2h.Mtb | D1.24h.Con | D1.24h.Mtb | D1.72h.Con | D1.72h.Mtb | D2.2h.Con | D2.2h.Mtb | D2.24h.Con | D2.24h.Mtb | D2.72h.Con | D2.72h.Mtb | D3.2h.Con | D3.2h.Mtb | D3.24h.Con |
|-----------------------|-----------|-----------|------------|------------|------------|------------|-----------|-----------|------------|------------|------------|------------|-----------|-----------|------------|
| <b>ENA-78 (CXCL5)</b> | 22.6      | 19.8      | 5755.1     | 18221.8    | 16034.2    | 34643.5    | 26.8      | 30.1      | 6022.2     | 15115.5    | 14822.6    | 33316.3    | 59.1      | 64.5      | 9392.3     |
| <b>GM-CSF (CSF2)</b>  | 0.0       | 0.2       | 1.7        | 55.5       | 1.0        | 50.8       | 0.0       | 0.1       | 1.6        | 18.5       | 1.1        | 12.0       | 0.1       | 0.4       | 1.6        |
| <b>IL-10</b>          | 1.0       | 1.4       | 19.8       | 22.2       | 16.7       | 19.5       | 0.9       | 1.5       | 12.1       | 20.6       | 15.2       | 19.3       | 2.3       | 2.6       | 17.2       |
| <b>IL-15</b>          | 0.1       | 0.1       | 0.7        | 0.6        | 1.2        | 1.3        | 0.1       | 0.1       | 0.5        | 0.5        | 0.7        | 0.6        | 0.0       | 0.0       | 0.3        |
| <b>IL-16</b>          | 11.3      | 6.4       | 45.9       | 43.2       | 88.4       | 106.2      | 6.1       | 10.1      | 45.5       | 42.8       | 46.1       | 55.3       | 7.1       | 4.2       | 26.0       |
| <b>IL-18</b>          | 43.6      | 42.8      | 63.3       | 69.3       | 46.5       | 87.7       | 25.5      | 37.6      | 80.4       | 118.7      | 53.2       | 126.9      | 36.8      | 39.3      | 99.1       |
| <b>IL-1a</b>          | 1.0       | 0.4       | 14.6       | 24.5       | 90.6       | 181.3      | 0.4       | 0.5       | 4.7        | 17.2       | 25.1       | 85.0       | 0.7       | 0.3       | 5.6        |
| <b>IL-1b</b>          | 1.2       | 1.2       | 16.5       | 47.3       | 19.1       | 65.6       | 0.8       | 3.0       | 10.9       | 54.6       | 12.6       | 54.5       | 1.0       | 1.5       | 18.4       |
| <b>IL-6</b>           | 11.7      | 15.8      | 84.7       | 549.2      | 89.3       | 582.6      | 6.2       | 11.7      | 52.4       | 319.6      | 62.2       | 335.6      | 21.4      | 32.8      | 97.0       |
| <b>IL-7</b>           | 0.0       | 0.1       | 0.1        | 0.1        | 0.3        | 0.3        | 0.1       | 0.1       | 0.1        | 0.2        | 0.2        | 0.1        | 0.1       | 0.1       | 0.1        |
| <b>IL-8</b>           | 452.7     | 449.2     | 3094.2     | 3060.9     | 3041.4     | 3058.1     | 240.6     | 294.0     | 2953.1     | 2970.8     | 3031.2     | 3039.2     | 750.6     | 806.8     | 3131.9     |
| <b>IP-10 (CXCL10)</b> | 0.2       | 0.2       | 0.5        | 2.5        | 1.0        | 9.9        | 0.1       | 0.1       | 0.4        | 1.0        | 0.4        | 18.5       | 0.3       | 0.3       | 0.7        |
| <b>MCP-1 (CCL2)</b>   | 1.2       | 1.1       | 41.8       | 83.7       | 196.6      | 328.4      | 0.5       | 0.4       | 59.3       | 106.3      | 381.1      | 509.4      | 0.8       | 0.9       | 24.9       |
| <b>MCP-4 (CCL13)</b>  | 1.0       | 1.1       | 5.2        | 8.5        | 5.3        | 18.6       | 1.7       | 0.9       | 2.1        | 7.1        | 1.7        | 15.1       | 2.5       | 0.9       | 7.7        |
| <b>MDC (CCL22)</b>    | 0.0       | 1.0       | 21.9       | 40.5       | 170.2      | 408.5      | 3.0       | 3.5       | 27.5       | 41.3       | 76.3       | 111.1      | 1.6       | 3.4       | 44.8       |
| <b>MIP-1a (CCL3)</b>  | 6.5       | 8.9       | 680.3      | 3037.7     | 635.1      | 0.0        | 3.4       | 8.1       | 127.5      | 791.7      | 74.3       | 887.7      | 16.7      | 26.8      | 1140.5     |
| <b>MIP-1b (CCL4)</b>  | 2.7       | 3.8       | 568.1      | 1119.2     | 640.1      | 10876.7    | 1.5       | 4.7       | 169.4      | 439.8      | 168.1      | 380.8      | 10.3      | 14.6      | 1412.1     |
| <b>MIP-3a (CCL20)</b> | 1.4       | 1.2       | 55.0       | 246.7      | 96.6       | 609.5      | 0.2       | 1.4       | 38.3       | 144.1      | 35.5       | 200.4      | 0.0       | 1.7       | 151.0      |
| <b>MIP-3b (CCL19)</b> | 0.0       | 0.1       | 7.0        | 8.0        | 8.5        | 10.4       | 0.0       | 0.0       | 15.1       | 16.6       | 11.7       | 12.5       | 0.0       | 0.0       | 16.9       |
| <b>MMP-1</b>          | 30.7      | 32.2      | 4904.7     | 4690.2     | 4749.9     | 6733.2     | 27.2      | 7.6       | 1658.3     | 1177.0     | 731.0      | 971.5      | 7.7       | 8.4       | 1356.0     |
| <b>MMP-10</b>         | 3.0       | 1.9       | 1169.5     | 1371.7     | 1391.3     | 2223.1     | 0.9       | 0.0       | 1477.4     | 1623.0     | 1430.3     | 1732.8     | 4.3       | 1.4       | 912.8      |
| <b>MMP-2</b>          | 145.4     | 6260.9    | 1245.8     | 1465.2     | 1865.9     | 1737.8     | 152.6     | 7512.0    | 3244.2     | 2661.3     | 3557.8     | 3117.8     | 132.8     | 5751.6    | 3294.0     |
| <b>MMP-3</b>          | 9.6       | 13.1      | 114.1      | 85.3       | 87.8       | 83.1       | 6.6       | 5.8       | 129.2      | 85.8       | 57.2       | 57.2       | 11.6      | 0.0       | 175.1      |
| <b>MMP-9</b>          | 559.5     | 1118.3    | 2180.3     | 1398.7     | 8054.0     | 9018.7     | 444.0     | 0.0       | 1299.5     | 1040.4     | 2083.5     | 2080.5     | 33.0      | 33.0      | 1814.7     |
| <b>TARC (CCL17)</b>   | 0.0       | 0.1       | 1.3        | 1.5        | 3.7        | 14.8       | 0.4       | 0.4       | 1.1        | 2.5        | 6.1        | 14.1       | 0.0       | 0.0       | 0.8        |
| <b>TNF-a</b>          | 70.2      | 70.3      | 389.7      | 565.8      | 175.5      | 397.4      | 40.8      | 51.2      | 126.1      | 203.4      | 60.4       | 131.5      | 94.5      | 127.8     | 228.1      |

**VEGFA**

1.4

1.9

3.8

0.7

2.9

1.6

1.4

0.5

1.3

1.6

1.9

1.2

1.4

1.2

1.5

| D3.24h.Mtb | D3.72h.Con | D3.72h.Mtb | D4.2h.Con | D4.2h.Mtb | D4.24h.Con | D4.24h.Mtb | D4.72h.Con | D4.72h.Mtb | D5.2h.Con | D5.2h.Mtb | D5.24h.Con | D5.24h.Mtb | D5.72h.Con | D5.72h.Mtb | D6.2h.Con | D6.2h.Mtb |
|------------|------------|------------|-----------|-----------|------------|------------|------------|------------|-----------|-----------|------------|------------|------------|------------|-----------|-----------|
| 32906.0    | 17889.7    | 35903.8    | 297.7     | 314.3     | 33852.5    | 36280.4    | 36045.2    | 38124.6    | 21.7      | 25.6      | 1812.0     | 7548.7     | 5026.3     | 25433.4    | 41.0      | 38.7      |
| 85.6       | 0.6        | 56.2       | 0.1       | 0.1       | 1.4        | 44.4       | 1.2        | 19.0       | 0.0       | 0.1       | 0.8        | 25.8       | 0.3        | 20.3       | 0.0       | 0.1       |
| 27.0       | 15.4       | 20.8       | 3.4       | 3.1       | 21.3       | 26.9       | 27.0       | 26.4       | 0.9       | 1.1       | 13.5       | 21.2       | 17.4       | 19.7       | 1.4       | 1.5       |
| 0.4        | 1.1        | 1.3        | 0.2       | 0.2       | 1.1        | 1.2        | 3.0        | 3.8        | 0.0       | 0.1       | 0.3        | 0.3        | 0.6        | 0.7        | 0.1       | 0.1       |
| 29.8       | 27.4       | 57.9       | 5.3       | 5.0       | 69.2       | 61.6       | 96.9       | 113.8      | 6.2       | 3.4       | 72.1       | 73.7       | 100.3      | 107.0      | 5.2       | 6.7       |
| 141.8      | 93.2       | 295.5      | 51.5      | 52.1      | 143.7      | 185.0      | 157.8      | 750.3      | 31.3      | 32.3      | 90.4       | 108.7      | 63.2       | 142.2      | 33.4      | 34.2      |
| 38.3       | 15.9       | 288.8      | 0.9       | 0.6       | 27.5       | 49.2       | 98.5       | 293.4      | 0.4       | 0.3       | 8.7        | 19.7       | 32.1       | 115.3      | 0.7       | 1.4       |
| 72.9       | 16.2       | 103.5      | 2.5       | 3.0       | 21.6       | 88.8       | 22.3       | 176.7      | 1.2       | 1.1       | 12.0       | 45.1       | 14.1       | 54.4       | 1.1       | 1.3       |
| 950.8      | 88.1       | 1010.5     | 57.7      | 63.7      | 280.9      | 1253.3     | 283.5      | 1255.8     | 13.9      | 18.7      | 100.3      | 682.9      | 102.9      | 714.6      | 9.6       | 11.6      |
| 0.2        | 0.3        | 0.2        | 0.0       | 0.1       | 0.1        | 0.1        | 0.3        | 0.2        | 0.0       | 0.1       | 0.2        | 0.1        | 0.2        | 0.2        | 0.1       | 0.1       |
| 3070.7     | 3135.3     | 3091.2     | 1739.5    | 1753.9    | 3086.6     | 3093.7     | 3109.2     | 3094.1     | 398.1     | 443.2     | 3046.7     | 3059.1     | 3059.8     | 3063.0     | 341.8     | 344.3     |
| 5.0        | 0.5        | 22.4       | 1.0       | 0.9       | 5.1        | 16.8       | 3.8        | 119.7      | 0.3       | 0.3       | 1.7        | 4.1        | 1.1        | 4.6        | 0.1       | 0.1       |
| 65.1       | 95.2       | 300.6      | 2.7       | 2.4       | 113.4      | 211.4      | 787.8      | 961.9      | 0.5       | 0.5       | 59.5       | 77.3       | 429.3      | 567.1      | 0.1       | 0.1       |
| 30.4       | 10.0       | 42.8       | 1.2       | 0.0       | 14.2       | 38.4       | 8.8        | 60.8       | 2.2       | 1.6       | 2.7        | 5.7        | 3.9        | 13.0       | 1.0       | 0.5       |
| 131.3      | 375.5      | 1900.0     | 1.8       | 3.5       | 272.9      | 335.6      | 1205.5     | 2554.2     | 0.7       | 3.7       | 53.0       | 89.5       | 357.3      | 805.1      | 2.4       | 8.6       |
| 0.0        | 1029.6     | 0.0        | 11.4      | 13.5      | 3304.8     | 0.0        | 167.9      | 0.0        | 5.7       | 8.3       | 262.8      | 1223.6     | 653.9      | 4878.3     | 0.2       | 2.9       |
| 0.0        | 1040.3     | 0.0        | 18.6      | 19.5      | 1897.2     | 0.0        | 2022.5     | 0.0        | 2.7       | 4.3       | 278.9      | 631.3      | 377.6      | 1017.6     | 1.8       | 2.5       |
| 761.9      | 168.6      | 1417.6     | 5.4       | 7.9       | 845.4      | 2367.0     | 894.5      | 3806.6     | 2.6       | 1.1       | 141.5      | 513.7      | 97.2       | 510.0      | 2.4       | 0.5       |
| 17.2       | 22.0       | 28.7       | 0.0       | 0.0       | 23.4       | 27.2       | 36.9       | 45.6       | 0.0       | 0.0       | 12.6       | 15.1       | 8.5        | 9.5        | 0.0       | 0.0       |
| 3764.9     | 1543.4     | 3958.6     | 10.1      | 0.0       | 3233.0     | 6927.2     | 11641.2    | 9990.0     | 19.6      | 32.2      | 1351.3     | 1597.1     | 1970.8     | 3440.6     | 10.3      | 2.1       |
| 1626.6     | 1359.8     | 2521.4     | 5.6       | 10.5      | 2187.7     | 3079.2     | 3082.0     | 0.0        | 3.2       | 3.5       | 656.7      | 892.9      | 694.8      | 1038.3     | 1.4       | 0.4       |
| 3531.1     | 3370.3     | 3431.8     | 158.9     | 2522.9    | 2887.4     | 3010.6     | 3420.3     | 167.4      | 242.5     | 6553.7    | 3477.6     | 3496.7     | 3618.9     | 3618.8     | 88.4      | 4506.2    |
| 276.0      | 182.6      | 198.0      | 1.7       | 4.3       | 119.8      | 177.8      | 423.4      | 227.0      | 0.0       | 17.6      | 193.3      | 188.9      | 241.8      | 355.8      | 4.7       | 2.9       |
| 3353.9     | 13622.0    | 38218.7    | 520.6     | 72.8      | 2981.9     | 4780.5     | 50710.0    | 47172.8    | 825.7     | 327.0     | 2276.5     | 2897.7     | 11794.0    | 25775.7    | 0.0       | 0.0       |
| 4.1        | 2.9        | 18.8       | 0.3       | 0.3       | 5.7        | 10.0       | 18.0       | 47.0       | 0.1       | 0.5       | 1.3        | 2.4        | 5.4        | 17.7       | 0.0       | 0.0       |
| 631.5      | 128.9      | 482.2      | 202.4     | 185.3     | 461.3      | 1096.4     | 261.2      | 693.1      | 57.0      | 55.8      | 206.4      | 411.1      | 127.2      | 279.3      | 48.8      | 71.7      |

1.9 2.1 1.2 2.7 2.2 1.8 0.7 5.2 1.0 2.5 1.9 1.8 1.4 2.1 1.4 1.6 1.2

| D6.24h.Con | D6.24h.Mtb | D6.72h.Con | D6.72h.Mtb | D7.2h.Con | D7.2h.Mtb | D7.24h.Con | D7.24h.Mtb | D7.72h.Con | D7.72h.Mtb | D8.2h.Con | D8.2h.Mtb | D8.24h.Con | D8.24h.Mtb | D8.72h.Con | D8.72h.Mtb | D9.2h.Con |
|------------|------------|------------|------------|-----------|-----------|------------|------------|------------|------------|-----------|-----------|------------|------------|------------|------------|-----------|
| 5820.4     | 10751.7    | 13818.9    | 26886.1    | 49.1      | 38.0      | 16918.5    | 43651.1    | 37522.3    | 46584.9    | 175.1     | 213.8     | 30441.4    | 47461.0    | 47291.3    | 49680.6    | 102.6     |
| 0.7        | 5.1        | 0.1        | 2.5        | 0.1       | 0.1       | 0.9        | 32.1       | 1.0        | 48.1       | 0.1       | 0.3       | 0.4        | 49.7       | 0.5        | 20.8       | 0.2       |
| 15.2       | 18.3       | 16.2       | 19.9       | 0.2       | 0.2       | 0.5        | 4.8        | 0.2        | 8.6        | 0.1       | 0.1       | 0.4        | 2.7        | 0.2        | 0.8        | 0.2       |
| 0.5        | 0.5        | 1.3        | 1.6        | 0.1       | 0.0       | 0.6        | 0.9        | 1.7        | 2.8        | 0.1       | 0.1       | 0.8        | 0.9        | 2.1        | 2.2        | 0.1       |
| 52.5       | 57.8       | 115.8      | 148.1      | 4.0       | 2.8       | 73.5       | 88.7       | 124.5      | 173.6      | 3.9       | 4.7       | 67.5       | 72.4       | 95.8       | 134.2      | 10.5      |
| 120.3      | 135.5      | 97.1       | 153.1      | 31.7      | 27.2      | 123.7      | 206.1      | 101.6      | 469.2      | 86.9      | 86.1      | 245.6      | 341.0      | 212.9      | 734.1      | 72.8      |
| 11.1       | 30.6       | 67.1       | 196.0      | 0.4       | 0.1       | 15.8       | 66.1       | 80.6       | 610.0      | 0.7       | 0.8       | 26.4       | 62.1       | 85.9       | 445.8      | 1.2       |
| 18.9       | 35.7       | 27.8       | 51.9       | 0.1       | 0.1       | 1.4        | 54.3       | 1.7        | 94.7       | 0.1       | 0.0       | 3.2        | 34.4       | 3.8        | 65.0       | 0.1       |
| 75.4       | 291.8      | 64.3       | 289.8      | 7.0       | 3.6       | 21.8       | 605.4      | 31.7       | 1081.4     | 3.0       | 0.0       | 35.4       | 1838.9     | 37.5       | 1892.0     | 16.3      |
| 0.1        | 0.2        | 0.5        | 0.3        | 0.0       | 0.0       | 0.1        | 0.1        | 0.2        | 0.1        | 0.1       | 0.0       | 0.2        | 0.1        | 0.7        | 0.2        | 0.0       |
| 3117.8     | 3069.5     | 3124.6     | 3073.9     | 97.6      | 69.6      | 11892.2    | 42164.8    | 17393.7    | 67344.5    | 117.6     | 170.7     | 80833.4    | 235658.2   | 110941.9   | 293632.6   | 764.6     |
| 1.4        | 41.2       | 3.9        | 295.8      | 0.2       | 0.2       | 3.0        | 118.7      | 5.3        | 787.6      | 0.2       | 0.2       | 7.7        | 18.2       | 8.5        | 211.6      | 1.0       |
| 33.9       | 113.3      | 458.7      | 1111.1     | 0.5       | 0.5       | 88.2       | 291.9      | 792.2      | 1740.7     | 0.8       | 0.7       | 167.5      | 850.8      | 760.6      | 3248.5     | 1.8       |
| 4.2        | 5.1        | 5.7        | 18.4       | 0.0       | 0.0       | 1.8        | 7.1        | 4.8        | 13.1       | 0.0       | 0.6       | 11.6       | 29.1       | 11.5       | 37.6       | 0.0       |
| 15.6       | 38.7       | 134.3      | 222.3      | 0.1       | 0.0       | 124.1      | 146.6      | 647.5      | 1768.5     | 0.8       | 0.0       | 108.6      | 181.3      | 547.5      | 1393.0     | 1.0       |
| 483.2      | 1618.7     | 109.9      | 2915.9     | 5.2       | 2.8       | 218.6      | 1780.2     | 24.0       | 1965.6     | 2.5       | 5.4       | 1818.4     | 7518.8     | 344.6      | 7881.0     | 64.7      |
| 740.6      | 1675.2     | 723.1      | 3557.0     | 4.0       | 2.5       | 675.4      | 1476.4     | 377.5      | 1600.2     | 2.5       | 4.4       | 4838.9     | 6092.3     | 5116.8     | 6408.6     | 33.8      |
| 331.1      | 648.5      | 379.9      | 760.3      | 2.1       | 0.9       | 350.4      | 1998.5     | 412.3      | 3887.7     | 2.2       | 4.7       | 958.3      | 4033.0     | 1258.1     | 8086.1     | 7.6       |
| 13.2       | 13.3       | 9.9        | 8.9        | 0.0       | 0.0       | 19.5       | 31.3       | 20.9       | 68.7       | 0.0       | 0.0       | 23.7       | 29.2       | 36.4       | 41.0       | 0.0       |
| 1687.7     | 2054.9     | 2678.7     | 3412.2     | 3.6       | 16.8      | 6941.4     | 11924.7    | 8055.6     | 18060.2    | 7.6       | 8.8       | 8105.3     | 12365.8    | 10316.0    | 18673.7    | 5.3       |
| 1558.7     | 1593.4     | 2134.0     | 2131.6     | 7.4       | 3.1       | 2979.9     | 3849.9     | 3944.6     | 5889.1     | 0.4       | 0.0       | 3295.7     | 4280.5     | 4348.9     | 6046.5     | 0.0       |
| 2691.7     | 3193.2     | 3091.1     | 3165.1     | 0.0       | 4770.8    | 5058.7     | 5315.9     | 5366.3     | 5349.9     | 60.8      | 3545.5    | 4280.0     | 4579.9     | 4928.1     | 4889.5     | 0.0       |
| 263.2      | 294.7      | 321.6      | 370.6      | 15.2      | 7.4       | 456.4      | 532.8      | 449.0      | 565.1      | 11.7      | 13.7      | 387.4      | 417.8      | 452.9      | 492.4      | 3.2       |
| 1665.8     | 1875.0     | 11859.1    | 20576.3    | 0.0       | 0.0       | 8565.3     | 9725.6     | 43684.8    | 67196.6    | 0.0       | 85.1      | 2528.0     | 5019.6     | 16723.4    | 54994.6    | 0.0       |
| 0.6        | 1.2        | 5.6        | 32.2       | 0.4       | 0.3       | 2.8        | 7.0        | 16.3       | 69.6       | 0.2       | 0.2       | 3.4        | 14.0       | 20.7       | 76.3       | 0.4       |
| 322.4      | 416.8      | 168.7      | 251.0      | 52.1      | 45.0      | 218.6      | 726.9      | 55.3       | 747.0      | 41.3      | 0.0       | 257.4      | 1478.3     | 91.8       | 789.5      | 55.3      |

2.3 1.7 1.5 1.9 0.4 0.4 0.7 0.0 5.4 6.0 0.3 0.4 0.0 0.0 0.9 0.0 0.3

| D9.2h.Mtb | D9.24h.Con | D9.24h.Mtb | D9.72h.Con | D9.72h.Mtb | D10.2h.Con | D10.2h.Mtb | D10.24h.Con | D10.24h.Mtb | D10.72h.Con | D10.72h.Mtb | D11.2h.Con | D11.2h.Mtb | D11.24h.Con | D11.24h.Mtb | D11.72h.Con |
|-----------|------------|------------|------------|------------|------------|------------|-------------|-------------|-------------|-------------|------------|------------|-------------|-------------|-------------|
| 91.3      | 46207.3    | 45911.0    | 48173.7    | 48785.2    | 21.5       | 23.1       | 9855.4      | 30616.3     | 43418.8     | 47872.5     | 78.6       | 86.7       | 9165.5      | 26783.9     | 21034.8     |
| 0.2       | 12.7       | 74.7       | 10.8       | 55.6       | 0.1        | 0.1        | 0.7         | 10.0        | 1.1         | 4.2         | 0.0        | 0.0        | 0.0         | 7.1         | 0.3         |
| 0.1       | 0.9        | 2.2        | 0.7        | 5.8        | 0.1        | 0.1        | 0.7         | 0.8         | 0.3         | 0.4         | 0.1        | 0.1        | 0.3         | 0.6         | 0.1         |
| 0.0       | 0.6        | 0.9        | 1.4        | 2.1        | 0.1        | 0.0        | 0.7         | 0.7         | 1.9         | 2.0         | 0.0        | 0.0        | 0.4         | 0.3         | 1.3         |
| 6.9       | 86.2       | 92.9       | 108.1      | 146.4      | 4.1        | 6.3        | 69.6        | 72.2        | 203.5       | 221.8       | 8.2        | 5.8        | 30.4        | 35.2        | 103.3       |
| 58.1      | 211.9      | 298.8      | 215.3      | 490.0      | 31.9       | 29.3       | 75.3        | 87.3        | 68.2        | 159.3       | 16.4       | 17.2       | 62.3        | 73.5        | 48.3        |
| 0.8       | 29.5       | 116.9      | 103.3      | 703.1      | 0.3        | 0.5        | 6.6         | 11.7        | 122.0       | 230.5       | 0.3        | 0.3        | 1.9         | 7.1         | 52.8        |
| 0.1       | 5.2        | 46.4       | 7.4        | 84.6       | 0.1        | 0.1        | 1.0         | 6.6         | 2.5         | 15.4        | 0.1        | 0.1        | 0.3         | 3.0         | 1.0         |
| 13.7      | 609.0      | 1380.0     | 842.3      | 1629.4     | 0.9        | 1.5        | 19.0        | 368.3       | 19.8        | 379.7       | 0.7        | 3.1        | 3.9         | 347.4       | 4.9         |
| 0.0       | 0.1        | 0.1        | 0.2        | 0.1        | 0.1        | 0.0        | 0.1         | 0.0         | 0.4         | 0.2         | 0.0        | 0.0        | 0.2         | 0.1         | 0.4         |
| 661.9     | 183224.7   | 243204.5   | 225766.7   | 283395.2   | 0.0        | 0.0        | 51210.7     | 132438.4    | 75105.6     | 165517.1    | 86.2       | 561.6      | 9323.1      | 59383.5     | 13383.8     |
| 1.0       | 35.3       | 494.3      | 42.7       | 1339.5     | 0.3        | 0.4        | 3.1         | 3.9         | 6.5         | 85.7        | 0.1        | 0.1        | 0.8         | 0.8         | 1.9         |
| 1.9       | 413.5      | 584.7      | 917.6      | 2327.0     | 0.9        | 1.1        | 84.3        | 186.3       | 667.1       | 1241.8      | 1.6        | 2.0        | 17.9        | 41.8        | 461.9       |
| 0.5       | 43.9       | 61.5       | 62.7       | 65.1       | 0.0        | 0.0        | 6.7         | 14.4        | 3.7         | 24.9        | 0.0        | 2.1        | 0.9         | 4.9         | 0.3         |
| 0.3       | 316.0      | 328.9      | 2266.2     | 3499.2     | 0.5        | 0.0        | 82.2        | 104.1       | 332.5       | 600.3       | 0.0        | 0.2        | 31.4        | 69.9        | 115.3       |
| 57.1      | 8325.3     | 8261.8     | 8535.4     | 8522.6     | 5.1        | 8.5        | 1344.7      | 5415.2      | 319.9       | 6581.1      | 3.1        | 9.0        | 22.4        | 822.1       | 20.1        |
| 32.1      | 6457.1     | 6547.6     | 6372.8     | 6533.8     | 8.9        | 10.8       | 1336.0      | 2908.4      | 1677.8      | 4544.2      | 6.2        | 10.0       | 164.7       | 588.7       | 128.8       |
| 5.5       | 2539.4     | 3061.4     | 3700.8     | 5518.2     | 0.0        | 2.1        | 228.9       | 766.9       | 258.8       | 1160.3      | 0.5        | 3.5        | 8.6         | 117.2       | 18.9        |
| 0.0       | 32.0       | 34.3       | 58.5       | 59.3       | 0.0        | 0.0        | 29.4        | 29.2        | 22.7        | 29.4        | 0.0        | 0.5        | 17.1        | 17.2        | 14.3        |
| 0.0       | 16683.9    | 21645.3    | 20622.0    | 25854.6    | 0.0        | 0.0        | 10135.2     | 10587.8     | 11215.5     | 14941.7     | 10.7       | 10.5       | 1075.9      | 1520.8      | 1509.1      |
| 0.0       | 5160.2     | 5810.9     | 7723.5     | 7591.9     | 1.5        | 0.0        | 5856.4      | 5180.7      | 8485.8      | 7350.3      | 0.0        | 1.6        | 1423.9      | 1556.3      | 1455.0      |
| 2570.4    | 4869.6     | 4715.4     | 5079.1     | 4962.1     | 0.0        | 3610.6     | 4695.6      | 4852.1      | 4936.7      | 5038.7      | 0.0        | 2487.8     | 3939.8      | 4644.1      | 4903.7      |
| 2.6       | 451.8      | 490.0      | 496.7      | 522.2      | 14.0       | 4.7        | 470.1       | 469.8       | 424.1       | 505.4       | 16.2       | 24.3       | 154.2       | 381.4       | 401.1       |
| 0.0       | 9938.1     | 10108.4    | 89012.0    | 85647.1    | 0.0        | 0.0        | 1606.3      | 2428.8      | 14318.7     | 29137.2     | 0.0        | 0.0        | 1026.2      | 2374.6      | 13103.8     |
| 0.3       | 16.9       | 16.2       | 40.4       | 64.0       | 0.3        | 0.4        | 2.4         | 3.9         | 6.0         | 19.1        | 0.4        | 0.4        | 1.0         | 1.2         | 6.1         |
| 55.2      | 651.9      | 1283.8     | 302.6      | 1081.3     | 51.8       | 54.5       | 446.7       | 715.7       | 149.0       | 265.4       | 39.3       | 48.5       | 216.0       | 471.9       | 67.5        |

0.5 0.0 0.0 0.0 0.2 0.3 0.3 0.7 0.2 13.4 0.4 0.2 0.0 0.0 0.0 0.0

| D11.72h.Mfb | D12.2h.Con | D12.2h.Mfb | D12.24h.Con | D12.24h.Mfb | D12.72h.Con | D12.72h.Mfb | D13.2h.Con | D13.2h.Mfb | D13.24h.Con | D13.24h.Mfb | D13.72h.Con | D13.72h.Mfb | D14.2h.Con | D14.2h.Mfb        |
|-------------|------------|------------|-------------|-------------|-------------|-------------|------------|------------|-------------|-------------|-------------|-------------|------------|-------------------|
| 45996.4     | 127.5      | 125.6      | 23961.0     | 26454.5     | 47103.7     | 47121.6     | 84.1       | 46.1       | 12039.5     | 36943.2     | 29732.7     | 40790.0     | 95.8       | 117.3             |
| 4.2         | 0.2        | 0.2        | 4.0         | 11.9        | 3.6         | 11.5        | 0.2        | 0.5        | 2.8         | 62.4        | 1.0         | 23.8        | 0.0        | 0.1               |
| 0.3         | 0.2        | 0.2        | 0.3         | 0.5         | 0.2         | 0.3         | 0.1        | 0.1        | 0.1         | 1.5         | 0.1         | 1.7         | 0.0        | 0.0               |
| 1.2         | 0.1        | 0.0        | 0.2         | 0.2         | 0.8         | 0.9         | 0.1        | 0.1        | 0.5         | 0.8         | 1.3         | 3.2         | 0.1        | 0.1               |
| 149.8       | 5.2        | 4.1        | 44.2        | 41.7        | 67.4        | 95.5        | 3.1        | 3.2        | 29.0        | 39.7        | 49.3        | 103.3       | 4.8        | 3.7               |
| 95.0        | 36.2       | 34.8       | 99.3        | 112.0       | 105.9       | 150.9       | 23.3       | 21.5       | 87.1        | 165.5       | 88.6        | 262.8       | 16.1       | 17.2              |
| 116.1       | 0.6        | 0.6        | 7.9         | 33.1        | 42.8        | 274.2       | 0.2        | 0.3        | 4.2         | 54.0        | 33.9        | 271.0       | 1.1        | 0.3               |
| 6.3         | 0.4        | 0.4        | 1.7         | 7.7         | 2.7         | 31.0        | 0.0        | 0.1        | 0.4         | 30.3        | 0.6         | 36.2        | 0.0        | 0.0               |
| 394.5       | 22.8       | 22.1       | 138.1       | 237.7       | 191.0       | 347.6       | 5.0        | 7.1        | 72.6        | 1697.3      | 84.0        | 1494.1      | 0.7        | 2.4               |
| 0.1         | 0.0        | 0.0        | 0.1         | 0.1         | 0.1         | 0.2         | 0.1        | 0.1        | 0.1         | 0.1         | 0.2         | 0.2         | 0.1        | 0.1               |
| 92322.1     | 647.8      | 1181.9     | 43070.4     | 44416.7     | 95624.8     | 144766.6    | 627.0      | 650.1      | 68726.7     | 200329.4    | 94296.9     | 260515.3    | 0.0        | 0.0               |
| 136.8       | 0.3        | 0.4        | 2.5         | 6.7         | 7.3         | 208.8       | 0.8        | 0.8        | 8.9         | 105.9       | 31.7        | 4153.6      | 0.2        | 0.3               |
| 879.1       | 0.9        | 0.7        | 88.5        | 60.8        | 1221.9      | 1129.3      | 1.9        | 2.1        | 77.9        | 139.8       | 326.0       | 978.6       | 1.5        | 1.9               |
| 12.6        | 1.3        | 3.0        | 9.8         | 9.0         | 14.5        | 23.1        | 1.2        | 0.1        | 14.3        | 24.2        | 13.3        | 36.8        | 0.6        | 0.5               |
| 298.9       | 3.8        | 3.0        | 61.7        | 56.8        | 431.6       | 438.2       | 1.1        | 0.2        | 113.1       | 174.0       | 1009.1      | 3377.2      | 3.7        | 2.8               |
| 673.6       | 121.3      | 113.0      | 2283.6      | 3323.2      | 4256.9      | 7075.0      | 29.6       | 52.0       | 5666.9      | 6939.3      | 5216.6      | 7178.5      | 4.0        | 7.5               |
| 1051.2      | 26.4       | 24.3       | 848.6       | 991.8       | 1933.3      | 2847.7      | 14.3       | 25.7       | 5855.9      | 6181.6      | 5626.2      | 6325.8      | 5.0        | 8.0               |
| 241.3       | 7.0        | 8.8        | 347.3       | 447.3       | 565.8       | 857.5       | 3.6        | 1.8        | 163.6       | 696.7       | 330.7       | 1851.3      | 0.0        | 2.0               |
| 15.7        | 0.5        | 1.0        | 19.7        | 19.0        | 29.4        | 26.3        | 1.4        | 1.3        | 16.4        | 17.5        | 21.9        | 29.2        | 0.0        | 0.8               |
| 1973.1      | 0.0        | 2.8        | 1048.2      | 1353.5      | 2790.2      | 2818.9      | 30.1       | 34.0       | 3647.9      | 6779.3      | 3656.2      | 8239.3      | 3989.5     | 0.00000106277.181 |
| 1714.5      | 1.2        | 3.7        | 1271.5      | 1198.1      | 1650.1      | 1843.0      | 5.6        | 3.2        | 1811.1      | 4487.5      | 2566.9      | 6926.5      | 6.5        | 0.0               |
| 4707.3      | 0.0        | 3074.9     | 4578.4      | 4022.2      | 4177.2      | 4712.9      | 68.3       | 2261.7     | 4120.8      | 4227.8      | 5158.4      | 5893.3      | 384.1      | 6531.1            |
| 408.7       | 8.5        | 20.2       | 231.0       | 301.5       | 459.0       | 405.7       | 18.5       | 26.4       | 389.2       | 376.0       | 375.0       | 397.9       | 0.0        | 3.8               |
| 19280.3     | 0.0        | 0.0        | 1461.2      | 1879.5      | 14946.7     | 11965.0     | 0.0        | 0.0        | 0.0         | 0.0         | 65525.9     | 118101.4    | 0.0        | 0.0               |
| 7.8         | 0.6        | 0.8        | 4.4         | 3.0         | 17.3        | 20.6        | 0.2        | 0.2        | 2.7         | 4.9         | 9.9         | 51.5        | 0.9        | 0.8               |
| 193.1       | 68.9       | 56.5       | 145.4       | 181.3       | 63.7        | 127.9       | 49.8       | 53.1       | 328.1       | 1244.0      | 114.6       | 755.6       | 30.0       | 37.4              |

0.0 0.3 0.5 0.1 0.1 0.0 0.0 0.7 0.7 2.1 0.0 10.3 0.2 0.8 0.8

| D14.24h.Con | D14.24h.Mtb | D14.72h.Con | D14.72h.Mtb | D15.2h.Con | D15.2h.Mtb | D15.24h.Con | D15.24h.Mtb | D15.72h.Con | D15.72h.Mtb | D16.2h.Con | D16.2h.Mtb | D16.24h.Con | D16.24h.Mtb | D16.72h.Con |
|-------------|-------------|-------------|-------------|------------|------------|-------------|-------------|-------------|-------------|------------|------------|-------------|-------------|-------------|
| 36110.9     | 42422.5     | 41877.6     | 43883.1     | 47.3       | 62.8       | 11866.4     | 29727.5     | 24515.9     | 40147.2     | 77.2       | 87.4       | 21378.4     | 39938.3     | 40286.2     |
| 0.5         | 31.8        | 0.3         | 16.3        | 0.0        | 0.3        | 1.0         | 38.3        | 0.6         | 19.3        | 0.0        | 0.2        | 0.7         | 40.2        | 0.2         |
| 0.2         | 1.9         | 0.1         | 1.0         | 0.0        | 0.1        | 0.2         | 1.9         | 0.1         | 2.8         | 0.0        | 0.1        | 0.2         | 1.4         | 0.1         |
| 0.6         | 0.8         | 1.6         | 1.7         | 0.1        | 0.1        | 0.4         | 0.8         | 1.2         | 2.3         | 0.0        | 0.0        | 0.5         | 0.6         | 1.5         |
| 66.4        | 73.4        | 116.7       | 153.2       | 8.1        | 11.1       | 60.3        | 60.3        | 84.1        | 106.0       | 8.8        | 9.3        | 51.6        | 49.8        | 90.2        |
| 94.7        | 153.6       | 99.2        | 273.1       | 46.1       | 52.3       | 112.6       | 177.4       | 81.1        | 337.6       | 70.6       | 70.6       | 128.5       | 166.0       | 111.7       |
| 10.0        | 35.3        | 83.2        | 331.3       | 1.0        | 2.0        | 14.2        | 44.4        | 49.2        | 374.0       | 0.7        | 1.0        | 12.5        | 34.3        | 78.9        |
| 0.3         | 35.5        | 0.6         | 69.3        | 0.1        | 0.1        | 0.6         | 20.6        | 0.7         | 44.9        | 0.1        | 0.1        | 1.3         | 24.5        | 2.1         |
| 15.4        | 905.6       | 16.1        | 968.1       | 6.4        | 10.9       | 38.4        | 820.7       | 32.8        | 857.8       | 2.9        | 5.2        | 33.3        | 782.5       | 33.4        |
| 0.2         | 0.1         | 0.4         | 0.2         | 0.1        | 0.0        | 0.1         | 0.1         | 0.2         | 0.1         | 0.0        | 0.0        | 0.2         | 0.1         | 0.4         |
| 38832.4     | 166831.8    | 51314.6     | 218726.5    | 758.2      | 955.3      | 57591.6     | 170435.7    | 74089.9     | 239259.4    | 583.7      | 783.6      | 77179.3     | 200384.1    | 93450.4     |
| 2.3         | 10.4        | 4.5         | 287.7       | 1.5        | 1.6        | 21.2        | 927.8       | 36.0        | 18741.5     | 0.8        | 1.0        | 5.6         | 24.3        | 6.7         |
| 80.0        | 176.4       | 749.3       | 1090.5      | 1.4        | 1.7        | 128.2       | 266.2       | 617.6       | 2486.9      | 1.5        | 1.7        | 73.2        | 183.8       | 423.6       |
| 3.8         | 14.2        | 5.4         | 22.7        | 0.8        | 0.9        | 6.4         | 23.8        | 7.5         | 35.0        | 0.2        | 0.0        | 3.7         | 15.5        | 6.1         |
| 202.8       | 434.9       | 1106.9      | 3587.0      | 2.1        | 3.1        | 105.3       | 178.0       | 474.4       | 1620.3      | 2.4        | 3.0        | 127.5       | 188.3       | 824.6       |
| 814.8       | 6051.8      | 47.6        | 6467.7      | 15.6       | 37.8       | 2327.4      | 6712.1      | 282.2       | 6867.7      | 11.3       | 19.2       | 1489.4      | 6374.9      | 91.8        |
| 1751.1      | 4568.3      | 1112.9      | 5283.4      | 21.2       | 38.5       | 3812.9      | 6074.4      | 3304.1      | 6265.7      | 9.7        | 14.6       | 2877.5      | 5047.9      | 2373.3      |
| 138.2       | 824.8       | 177.8       | 1589.3      | 4.0        | 5.2        | 210.4       | 863.6       | 256.0       | 1873.1      | 2.7        | 3.7        | 115.1       | 571.6       | 187.2       |
| 21.2        | 24.9        | 31.7        | 35.8        | 0.2        | 1.0        | 16.8        | 21.8        | 22.7        | 51.5        | 0.3        | 1.3        | 16.0        | 21.0        | 29.4        |
| 3839.1      | 7943.4      | 19.1        | 5.2         | 1503.2     | 2948.2     | 1932.6      | 4238.4      | 31.8        | 30.3        | 6695.0     | 5901.4     | 6335.2      | 12419.2     | 75.8        |
| 2847.1      | 4252.5      | 2912.7      | 5236.1      | 0.0        | 0.0        | 930.1       | 1958.9      | 1473.6      | 3053.9      | 12.7       | 9.6        | 4629.8      | 5032.6      | 6678.2      |
| 3460.5      | 4104.9      | 4274.3      | 4723.4      | 0.0        | 2946.4     | 4811.6      | 5300.3      | 3582.1      | 3508.6      | 0.0        | 4232.8     | 3637.1      | 4143.0      | 4359.3      |
| 372.5       | 351.0       | 322.6       | 353.8       | 8.4        | 8.4        | 379.7       | 444.3       | 451.7       | 469.0       | 15.3       | 16.5       | 335.2       | 271.1       | 280.0       |
| 0.0         | 0.0         | 9744.6      | 29477.3     | 0.0        | 0.0        | 0.0         | 0.0         | 26691.2     | 61882.2     | 0.0        | 0.0        | 0.0         | 0.0         | 25278.3     |
| 2.7         | 9.0         | 9.3         | 107.7       | 0.4        | 0.5        | 3.3         | 8.2         | 8.4         | 66.5        | 0.1        | 0.2        | 1.2         | 3.3         | 6.7         |
| 393.0       | 1114.2      | 122.2       | 523.5       | 41.5       | 59.4       | 108.4       | 448.5       | 27.8        | 403.0       | 57.6       | 82.4       | 401.0       | 929.2       | 142.5       |

5.3 0.6 0.6 0.0 0.8 0.7 2.7 0.5 6.7 2.8 0.6 0.7 0.2 0.0 2.1

| D16.72h.Mfb | D17.2h.Con | D17.2h.Mfb | D17.24h.Con | D17.24h.Mfb | D17.72h.Con | D17.72h.Mfb | D18.2h.Con         | D18.2h.Mfb | D18.24h.Con | D18.24h.Mfb       | D18.72h.Con | D18.72h.Mfb |
|-------------|------------|------------|-------------|-------------|-------------|-------------|--------------------|------------|-------------|-------------------|-------------|-------------|
| 43962.3     | 22.3       | 27.8       | 11658.7     | 39525.8     | 33769.1     | 43777.1     | 36.6               | 39.5       | 21335.4     | 36389.7           | 39618.9     | 42519.2     |
| 17.9        | 0.0        | 0.4        | 0.5         | 63.5        | 1.8         | 36.2        | 0.0                | 0.1        | 1.2         | 7.8               | 0.1         | 4.2         |
| 1.8         | 0.0        | 0.1        | 0.1         | 2.4         | 0.1         | 3.5         | 0.0                | 0.0        | 0.2         | 0.6               | 0.2         | 1.1         |
| 1.9         | 0.1        | 0.1        | 0.7         | 1.0         | 2.1         | 3.2         | 0.1                | 0.0        | 0.6         | 0.6               | 1.2         | 1.7         |
| 132.4       | 2.6        | 4.4        | 52.8        | 55.5        | 89.7        | 159.3       | 2.9                | 3.7        | 55.8        | 49.0              | 79.8        | 101.1       |
| 337.6       | 78.6       | 90.7       | 154.7       | 230.2       | 112.0       | 440.5       | 30.1               | 37.6       | 95.9        | 106.5             | 78.1        | 181.2       |
| 306.9       | 0.8        | 1.0        | 21.1        | 107.0       | 129.1       | 1133.8      | 0.7                | 0.8        | 15.1        | 30.5              | 86.2        | 248.0       |
| 48.9        | 0.1        | 0.2        | 1.0         | 64.6        | 1.7         | 149.7       | 0.1                | 0.1        | 1.3         | 10.9              | 1.8         | 21.9        |
| 859.5       | 2.2        | 4.9        | 29.2        | 1207.3      | 37.7        | 1568.6      | 5.3                | 5.3        | 75.1        | 242.3             | 71.2        | 307.2       |
| 0.2         | 0.1        | 0.0        | 0.2         | 0.1         | 0.5         | 0.2         | 0.1                | 0.0        | 0.2         | 0.1               | 0.2         | 0.2         |
| 247443.4    | 0.0        | 347.3      | 72528.7     | 231171.4    | 96478.3     | 304233.3    | 411.7              | 523.6      | 74255.1     | 122062.6          | 91655.1     | 175115.5    |
| 556.6       | 0.4        | 0.6        | 13.4        | 64.7        | 13.6        | 3009.6      | 1.4                | 1.0        | 13.6        | 86.7              | 14.3        | 523.4       |
| 1312.8      | 3.9        | 5.4        | 121.8       | 380.0       | 979.1       | 2216.4      | 0.8                | 0.9        | 181.8       | 294.7             | 871.0       | 1368.2      |
| 24.8        | 0.4        | 0.0        | 11.5        | 35.8        | 11.7        | 50.5        | 0.0                | 1.0        | 7.2         | 12.6              | 6.6         | 13.1        |
| 2573.4      | 2.7        | 3.5        | 390.5       | 588.3       | 1895.2      | 6257.0      | 5.7                | 3.1        | 187.4       | 183.8             | 863.9       | 2303.0      |
| 6614.1      | 8.6        | 22.8       | 3362.8      | 6896.8      | 1188.2      | 7154.6      | 8.2                | 11.1       | 2385.2      | 5103.2            | 806.2       | 6184.3      |
| 6081.9      | 8.0        | 19.4       | 5037.6      | 6079.8      | 4054.8      | 6229.8      | 8.6                | 9.0        | 3417.3      | 4287.6            | 2710.2      | 5276.7      |
| 1659.5      | 1.0        | 4.7        | 276.0       | 1825.3      | 441.3       | 6004.9      | 3.3                | 4.4        | 380.9       | 557.7             | 382.1       | 980.3       |
| 39.4        | 0.6        | 2.2        | 17.1        | 20.1        | 24.7        | 37.6        | 0.3                | 0.8        | 14.8        | 15.3              | 24.5        | 28.8        |
| 75.6        | 6453.6     | 13993.1    | 6915.7      | 17524.0     | 44.7        | 32.3        | 8396.6             | 7316.1     | 7863.2      | 10625.3           |             |             |
| 8116.4      | 6.6        | 1.3        | 3359.6      | 5493.7      | 4149.3      | 8389.7      | 2.0                | 0.0        | 4336.2      | 0.0               | 5017.1      | 6606.0      |
| 4606.7      | 0.0        | 3375.2     | 3480.0      | 4406.1      | 4503.8      | 4569.7      | 0.00000103523.5375 | 2026.0     | 3953.7      | 4157.0            |             |             |
| 421.9       | 53.0       | 58.2       | 324.8       | 426.7       | 298.1       | 365.3       | 31.7               | 27.5       | 359.9       | 304.4             | 281.0       | 297.1       |
| 67177.0     | 0.0        | 0.0        | 0.0         | 0.0         | 12346.8     | 35045.6     | 0.0                | 0.0        | 27936.5     | 0.000001044914.46 |             |             |
| 61.0        | 0.6        | 0.7        | 3.5         | 14.5        | 11.0        | 165.4       | 0.9                | 0.9        | 5.4         | 7.6               | 22.9        | 74.5        |
| 554.7       | 39.6       | 53.6       | 253.2       | 1008.3      | 85.7        | 724.7       | 31.6               | 44.3       | 288.4       | 354.1             | 73.6        | 176.4       |

0.2 0.7 0.8 1.4 0.2 12.2 11.0

0.7 0.6 1.1

0.1 52.5 6.8

| D19.2h.Con | D19.2h.Mtb | D19.24h.Con | D19.24h.Mtb | D19.72h.Con | D19.72h.Mtb | D20.2h.Con | D20.2h.Mtb | D20.24h.Con | D20.24h.Mtb | D20.72h.Con | D20.72h.Mtb | D21.2h.Con | D21.2h.Mtb | D21.24h.Con | D21.24h.Mtb |
|------------|------------|-------------|-------------|-------------|-------------|------------|------------|-------------|-------------|-------------|-------------|------------|------------|-------------|-------------|
| 37.5       | 38.7       | 9807.8      | 37372.0     | 36165.4     | 46349.8     | 253.8      | 289.3      | 40365.7     | 45556.0     | 42731.6     | 46360.8     | 45.5       | 61.0       | 21208.1     | 37855.4     |
| 0.1        | 0.6        | 0.7         | 103.6       | 0.5         | 62.5        | 0.2        | 2.2        | 3.0         | 165.1       | 1.7         | 210.5       | 0.1        | 0.5        | 1.3         | 26.7        |
| 0.1        | 0.1        | 0.4         | 2.5         | 0.2         | 1.0         | 0.1        | 0.5        | 0.5         | 6.7         | 0.5         | 23.5        | 0.1        | 0.2        | 0.3         | 1.9         |
| 0.1        | 0.1        | 0.3         | 0.4         | 0.8         | 1.0         | 0.1        | 0.1        | 0.8         | 1.9         | 2.0         | 5.7         | 0.1        | 0.1        | 0.4         | 0.6         |
| 13.7       | 12.5       | 119.7       | 115.0       | 203.3       | 239.6       | 9.1        | 10.5       | 100.7       | 118.8       | 141.9       | 295.8       | 14.9       | 14.1       | 102.8       | 105.0       |
| 68.0       | 67.9       | 123.0       | 159.2       | 89.5        | 311.2       | 38.5       | 51.7       | 119.6       | 342.2       | 114.9       | 2910.8      | 27.2       | 28.4       | 75.0        | 117.2       |
| 1.3        | 3.5        | 20.6        | 51.3        | 143.8       | 567.7       | 1.6        | 2.2        | 18.0        | 305.5       | 54.6        | 2992.9      | 1.0        | 0.7        | 14.6        | 49.3        |
| 0.1        | 0.1        | 0.9         | 30.8        | 1.5         | 75.8        | 0.1        | 0.3        | 0.8         | 147.9       | 0.8         | 575.1       | 0.0        | 0.1        | 0.4         | 22.1        |
| 3.5        | 8.1        | 35.9        | 1142.6      | 40.0        | 1093.2      | 7.5        | 25.5       | 49.7        | 2071.7      | 57.7        | 2326.2      | 1.9        | 4.4        | 20.0        | 364.0       |
| 0.0        | 0.0        | 0.1         | 0.2         | 0.3         | 0.2         | 0.0        | 0.1        | 0.1         | 0.2         | 0.1         | 0.4         | 0.0        | 0.0        | 0.1         | 0.1         |
| 109.5      | 177.5      | 27147.2     | 108951.1    | 37983.3     | 141931.1    | 471.1      | 703.5      | 68647.7     | 206548.5    | 69140.2     | 247860.0    | 126.5      | 232.1      | 20428.9     | 68622.7     |
| 0.2        | 0.2        | 1.8         | 0.7         | 2.5         | 72.3        | 1.9        | 2.1        | 45.4        | 0.0         | 168.5       | 0.0         | 0.7        | 0.8        | 18.6        | 424.2       |
| 5.7        | 6.3        | 335.4       | 685.9       | 2245.2      | 4616.4      | 25.8       | 29.3       | 1241.8      | 4708.1      | 4100.9      | 13730.9     | 10.5       | 13.3       | 654.8       | 1265.4      |
| 0.6        | 0.9        | 4.3         | 8.3         | 7.4         | 22.8        | 1.5        | 0.0        | 16.3        | 53.4        | 12.9        | 62.3        | 1.1        | 0.9        | 4.9         | 12.7        |
| 3.6        | 1.9        | 193.6       | 390.6       | 1891.6      | 7742.8      | 10.1       | 12.5       | 872.8       | 1314.9      | 4666.9      | 15348.2     | 6.4        | 7.8        | 651.9       | 659.6       |
| 7.2        | 16.9       | 1045.0      | 5624.2      | 964.6       | 7067.9      | 21.6       | 93.3       | 2675.7      | 7873.8      | 590.1       | 7877.0      | 1.8        | 12.4       | 1314.4      | 5598.0      |
| 12.1       | 24.7       | 11166.2     | 0.0         | 37470.5     | 0.0         | 79.0       | 234.1      | 0.0         | 0.0         | 0.0         | 0.0         | 7.2        | 27.8       | 0.0         | 0.0         |
| 0.2        | 4.1        | 175.1       | 829.5       | 242.3       | 1943.1      | 5.4        | 8.9        | 417.7       | 3833.5      | 620.1       | 12592.3     | 0.0        | 0.0        | 220.0       | 504.7       |
| 0.0        | 0.0        | 17.3        | 19.0        | 19.6        | 38.8        | 0.0        | 0.4        | 33.7        | 79.8        | 66.8        | 172.6       | 0.0        | 0.0        | 23.3        | 25.0        |
| 0.0        | 0.0        | 772.7       | 1462.9      | 978.8       | 3880.8      | 0.4        | 4.2        | 661.2       | 1857.0      | 474.3       | 1631.2      | 0.0        | 0.0        | 3274.8      | 3631.1      |
| 1.2        | 5.0        | 2272.4      | 3024.7      | 2533.5      | 3966.1      | 0.0        | 1.2        | 842.7       | 2367.5      | 896.1       | 3145.3      | 1.8        | 0.0        | 1771.2      | 2172.8      |
| 0.0        | 3270.1     | 4044.0      | 4383.8      | 4938.7      | 3961.3      | 0.0        | 1871.6     | 2435.7      | 2420.8      | 3292.9      | 2909.5      | 1.1        | 1805.5     | 3349.1      | 2458.7      |
| 0.0        | 0.0        | 772.7       | 1462.9      | 978.8       | 3880.8      | 0.4        | 4.2        | 661.2       | 1857.0      | 474.3       | 1631.2      | 0.0        | 0.0        | 3274.8      | 3631.1      |
| 0.0        | 0.0        | 0.0         | 356.7       | 2153.1      | 11936.5     | 0.0        | 26.7       | 2577.7      | 4628.7      | 7786.4      | 16588.4     | 0.0        | 0.0        | 2676.0      | 2044.3      |
| 3.8        | 3.8        | 13.3        | 40.5        | 85.4        | 643.9       | 8.2        | 7.9        | 66.6        | 212.9       | 164.3       | 1191.6      | 7.5        | 8.8        | 30.4        | 73.0        |
| 62.8       | 67.7       | 315.4       | 963.6       | 112.0       | 488.7       | 47.9       | 103.4      | 84.5        | 1824.7      | 39.0        | 4017.6      | 34.8       | 52.1       | 205.0       | 422.3       |

0.5 0.5 1.1 0.0 9.3 0.0 1.2 1.8 0.8 0.0 0.4 93.7 1.0 1.2 11.4 3.1

| D21.72h.Con | D21.72h.Mfb | D22.2h.Con | D22.2h.Mfb | D22.24h.Con | D22.24h.Mfb | D22.72h.Con | D22.72h.Mfb | D23.2h.Con | D23.2h.Mfb | D23.24h.Con | D23.24h.Mfb | D23.72h.Con | D23.72h.Mfb | D24.2h.Con | D24.2h.Mfb |
|-------------|-------------|------------|------------|-------------|-------------|-------------|-------------|------------|------------|-------------|-------------|-------------|-------------|------------|------------|
| 42544.3     | 46281.3     | 94.6       | 99.1       | 23574.6     | 44958.0     | 44667.4     | 48694.0     | 63.7       | 70.5       | 25627.4     | 44325.4     | 44314.2     | 48438.3     | 188.5      | 125.4      |
| 0.8         | 21.0        | 0.1        | 0.2        | 0.9         | 51.6        | 0.4         | 18.7        | 0.1        | 0.3        | 0.9         | 24.3        | 22.0        | 13.8        | 0.1        | 1.5        |
| 0.2         | 1.8         | 0.1        | 0.1        | 1.1         | 1.8         | 0.2         | 3.0         | 0.1        | 0.1        | 0.2         | 0.8         | 0.9         | 1.6         | 0.1        | 0.4        |
| 1.0         | 1.6         | 0.1        | 0.1        | 0.5         | 0.6         | 1.5         | 1.8         | 0.1        | 0.1        | 0.8         | 1.7         | 1.6         | 2.9         | 0.1        | 0.1        |
| 153.9       | 185.9       | 23.4       | 20.3       | 91.8        | 90.0        | 158.7       | 236.8       | 5.3        | 3.1        | 77.6        | 95.0        | 90.8        | 162.7       | 21.6       | 21.8       |
| 78.1        | 181.2       | 70.8       | 69.3       | 190.1       | 265.6       | 156.1       | 465.9       | 72.8       | 64.0       | 188.7       | 244.3       | 184.9       | 436.8       | 51.3       | 59.9       |
| 103.9       | 394.1       | 1.4        | 1.7        | 18.6        | 63.5        | 173.3       | 643.3       | 0.7        | 0.5        | 23.8        | 107.3       | 97.8        | 573.2       | 1.7        | 2.4        |
| 0.6         | 36.0        | 0.1        | 0.1        | 3.3         | 40.2        | 5.9         | 104.4       | 0.1        | 0.1        | 1.5         | 8.8         | 7.0         | 25.8        | 0.2        | 0.3        |
| 19.1        | 384.3       | 4.1        | 5.4        | 66.4        | 1033.6      | 67.3        | 1257.1      | 2.9        | 5.4        | 45.6        | 459.4       | 426.8       | 941.0       | 11.4       | 27.9       |
| 0.2         | 0.2         | 0.0        | 0.1        | 0.1         | 0.1         | 0.3         | 0.4         | 0.0        | 0.0        | 0.1         | 0.4         | 0.4         | 0.4         | 0.0        | 0.1        |
| 24035.6     | 99976.7     | 351.3      | 363.5      | 95025.6     | 157950.1    | 109525.9    | 165920.6    | 336.1      | 326.0      | 78245.4     | 140776.9    | 132084.3    | 196814.9    | 673.6      | 731.2      |
| 81.4        | 1258.2      | 2.1        | 1.9        | 13.7        | 12.2        | 22.0        | 144.3       | 0.6        | 0.5        | 13.6        | 24.0        | 15.1        | 198.6       | 1.8        | 1.9        |
| 3971.3      | 7450.9      | 13.1       | 13.5       | 444.9       | 1115.7      | 1478.9      | 3522.1      | 19.6       | 18.5       | 419.1       | 1071.5      | 915.6       | 1638.8      | 10.6       | 10.5       |
| 6.5         | 20.9        | 0.6        | 0.1        | 10.7        | 20.0        | 12.0        | 35.8        | 1.5        | 1.1        | 17.8        | 17.6        | 23.3        | 49.3        | 1.1        | 0.8        |
| 2544.7      | 7965.2      | 6.2        | 4.0        | 474.4       | 541.1       | 3152.7      | 6669.6      | 8.2        | 11.2       | 685.3       | 2510.3      | 2153.0      | 11098.2     | 5.2        | 5.9        |
| 68.8        | 5878.0      | 11.5       | 16.3       | 3251.3      | 6972.6      | 2127.3      | 7448.5      | 10.2       | 16.3       | 3618.7      | 4483.8      | 4262.6      | 7555.5      | 8.6        | 26.4       |
| 10202.6     | 0.0         | 23.8       | 27.2       | 0.0         | 0.0         | 0.0         | 0.0         | 21.7       | 32.4       | 0.0         | 0.0         | 0.0         | 0.0         | 25.8       | 67.6       |
| 269.1       | 1149.8      | 2.9        | 4.4        | 583.1       | 1345.1      | 858.3       | 3763.8      | 4.4        | 3.1        | 506.1       | 1969.0      | 948.0       | 4735.6      | 5.1        | 6.2        |
| 37.1        | 60.0        | 0.0        | 0.0        | 23.3        | 30.2        | 47.1        | 55.8        | 0.0        | 0.4        | 25.5        | 30.8        | 51.3        | 58.4        | 0.0        | 0.0        |
| 2799.1      | 3213.6      | 0.0        | 0.0        | 18545.9     | 22281.7     | 29022.1     | 39422.9     | 4.2        | 11.6       | 2971.7      | 1650.2      | 1504.6      | 3111.1      | 0.0        | 0.0        |
| 2756.3      | 3711.6      | 10.4       | 8.1        | 19717.2     | 18823.0     | 26402.8     | 28555.9     | 2.7        | 0.5        | 2442.9      | 2980.6      | 2977.0      | 4092.7      | 6.8        | 3.3        |
| 3620.0      | 3200.1      | 0.0        | 2286.2     | 2855.5      | 3390.1      | 3525.9      | 3282.6      | 0.0        | 746.7      | 2735.3      | 3448.0      | 3546.5      | 3282.8      | 0.0        | 1833.6     |
| 2799.1      | 3213.6      | 0.0        | 0.0        | 18545.9     | 22281.7     | 29022.1     | 39422.9     | 4.2        | 11.6       | 2971.7      | 1650.2      | 1504.6      | 3111.1      | 0.0        | 0.0        |
| 9776.5      | 11943.0     | 0.0        | 0.0        | 3719.3      | 5644.9      | 31002.4     | 54904.8     | 184.1      | 0.0        | 2771.5      | 1949.4      | 7390.8      | 23426.9     | 99.3       | 184.1      |
| 133.9       | 846.9       | 1.1        | 1.7        | 33.2        | 52.8        | 213.7       | 520.6       | 11.6       | 10.8       | 84.2        | 149.1       | 131.9       | 679.0       | 1.5        | 2.5        |
| 57.1        | 233.5       | 77.9       | 82.0       | 767.0       | 1188.1      | 246.8       | 557.4       | 29.2       | 58.8       | 261.4       | 304.3       | 272.5       | 323.1       | 61.4       | 149.5      |

30.7 10.4 0.7 0.8 0.9 0.1 42.7 28.9 0.7 0.6 2.5 15.8 14.1 14.8 1.9 1.9

| D24.24h.Con | D24.24h.Mtb | D24.72h.Con | D24.72h.Mtb | D25.2h.Con | D25.2h.Mtb | D25.24h.Con | D25.24h.Mtb | D25.72h.Con | D25.72h.Mtb | D26.2h.Con | D26.2h.Mtb | D26.24h.Con | D26.24h.Mtb | D26.72h.Con | D26.72h.Mtb |
|-------------|-------------|-------------|-------------|------------|------------|-------------|-------------|-------------|-------------|------------|------------|-------------|-------------|-------------|-------------|
| 37858.1     | 46646.7     | 45944.3     | 48057.0     | 47.6       | 68.2       | 14845.5     | 37043.4     | 37256.1     | 43069.9     | 133.5      | 148.1      | 38313.0     | 40966.2     | 40650.6     | 43806.6     |
| 1.1         | 65.2        | 1.2         | 20.1        | 0.0        | 0.5        | 0.4         | 30.9        | 0.2         | 24.2        | 0.1        | 0.0        | 2.4         | 16.5        | 0.6         | 12.7        |
| 0.0         | 0.2         | 0.2         | 1.2         | 0.1        | 0.2        | 0.2         | 1.4         | 0.0         | 1.0         | 0.1        | 0.1        | 0.4         | 2.0         | 0.1         | 4.5         |
| 0.6         | 0.9         | 2.0         | 3.4         | 0.2        | 0.2        | 0.6         | 0.8         | 1.6         | 2.6         | 0.1        | 0.1        | 0.9         | 2.0         | 2.8         | 6.5         |
| 68.2        | 72.5        | 114.9       | 183.0       | 9.4        | 8.3        | 40.8        | 36.1        | 62.8        | 94.5        | 4.3        | 4.1        | 34.4        | 37.7        | 42.8        | 99.4        |
| 135.4       | 202.3       | 152.8       | 517.1       | 17.5       | 19.8       | 58.1        | 80.7        | 54.4        | 177.7       | 13.1       | 14.2       | 74.1        | 129.9       | 79.6        | 380.4       |
| 12.6        | 49.8        | 80.6        | 309.6       | 0.6        | 1.5        | 8.7         | 32.5        | 46.1        | 265.8       | 0.4        | 0.2        | 6.9         | 36.4        | 23.4        | 198.2       |
| 0.3         | 0.4         | 2.2         | 43.8        | 0.0        | 0.1        | 0.3         | 19.1        | 0.4         | 32.8        | 0.0        | 0.0        | 0.8         | 21.2        | 0.8         | 39.6        |
| 0.1         | 1.1         | 72.9        | 1609.6      | 1.1        | 6.2        | 21.1        | 928.4       | 21.6        | 1077.2      | 7.3        | 6.5        | 23.9        | 233.7       | 30.6        | 322.0       |
| 0.1         | 0.2         | 0.2         | 0.2         | 0.0        | 0.1        | 0.1         | 0.1         | 0.3         | 0.2         | 0.1        | 0.1        | 0.1         | 0.1         | 0.4         | 0.3         |
| 62329.8     | 140132.5    | 83783.2     | 175998.0    | 396.5      | 288.1      | 22800.8     | 113032.8    | 30041.4     | 199190.1    | 1513.1     | 1444.2     | 64305.5     | 200470.0    | 83121.1     | 227343.7    |
| 20.8        | 112.5       | 26.4        | 561.4       | 0.6        | 0.7        | 5.8         | 88.8        | 5.7         | 884.1       | 1.2        | 1.0        | 32.2        | 2345.7      | 80.6        | 9415.2      |
| 318.5       | 698.1       | 1509.7      | 3315.1      | 1.2        | 1.3        | 28.4        | 77.4        | 285.6       | 812.8       | 1.4        | 1.3        | 166.5       | 676.0       | 584.1       | 2284.6      |
| 13.6        | 28.0        | 8.5         | 29.1        | 0.0        | 0.0        | 7.9         | 27.3        | 9.7         | 45.6        | 0.0        | 0.5        | 13.2        | 45.9        | 13.4        | 42.1        |
| 298.3       | 454.2       | 2520.5      | 22226.6     | 1.4        | 0.7        | 45.9        | 98.5        | 232.7       | 865.4       | 1.9        | 0.9        | 105.6       | 155.7       | 502.7       | 4660.3      |
| 3311.7      | 7412.8      | 305.9       | 7360.8      | 9.3        | 27.6       | 1206.8      | 6149.9      | 78.8        | 6305.8      | 10.7       | 7.0        | 1269.6      | 6416.2      | 72.7        | 6368.0      |
| 0.0         | 0.0         | 0.0         | 0.0         | 6.4        | 21.0       | 1725.7      | 4586.9      | 1387.6      | 5384.6      | 15.2       | 11.5       | 4632.9      | 5505.8      | 2637.3      | 5474.5      |
| 609.7       | 1764.4      | 1118.9      | 3825.9      | 3.8        | 1.7        | 79.5        | 515.9       | 149.0       | 1651.5      | 5.6        | 2.8        | 176.3       | 578.8       | 237.2       | 1767.3      |
| 31.9        | 40.4        | 51.1        | 61.8        | 0.1        | 0.0        | 17.6        | 19.2        | 25.7        | 39.3        | 0.0        | 0.1        | 26.6        | 25.7        | 40.9        | 68.2        |
| 1253.1      | 3077.0      | 2026.1      | 3926.0      | 27.6       | 10.6       | 1970.1      | 1637.0      | 3139.7      | 5083.1      | 14.9       | 9.4        | 6327.3      | 8211.3      | 4096.1      | 7737.3      |
| 2387.0      | 4235.8      | 2461.1      | 5416.2      | 0.0        | 0.0        | 845.3       | 1234.3      | 1169.5      | 1943.0      | 5.5        | 5.1        | 3563.7      | 5389.5      | 3550.4      | 7466.2      |
| 3373.2      | 2694.0      | 3595.9      | 3702.5      | 0.0        | 4377.1     | 3443.6      | 3545.5      | 3822.8      | 3950.0      | 2686.4     | 14.7       | 2725.3      | 2505.3      | 2786.0      | 3691.0      |
| 1253.1      | 3077.0      | 2026.1      | 3926.0      | 6.2        | 3.1        | 271.6       | 182.7       | 364.3       | 398.7       | 9.6        | 4.0        | 403.6       | 292.8       | 251.8       | 269.0       |
| 2599.6      | 4077.2      | 29026.6     | 68014.2     | 399.3      | 200.4      | 1950.3      | 1632.5      | 12836.3     | 31222.0     | 219.8      |            | 7141.9      | 6006.7      | 16587.7     | 43393.9     |
| 27.1        | 48.3        | 67.6        | 241.8       | 0.3        | 0.5        | 1.0         | 2.8         | 4.6         | 31.3        | 0.4        | 0.5        | 4.3         | 9.4         | 7.2         | 49.5        |
| 1.8         | 6.3         | 81.6        | 402.7       | 21.9       | 51.4       | 211.6       | 769.1       | 77.5        | 518.7       | 92.5       | 87.8       | 115.4       | 491.8       | 44.3        | 556.2       |

3.7 0.2 37.9 1.2 0.8 0.9 5.3 1.5 11.9 0.8 2.4 3.0 19.7 1.9 43.3 54.4

| D27.2h.Con | D27.2h.Mtb | D27.24h.Con | D27.24h.Mtb | D27.72h.Con | D27.72h.Mtb | D28.2h.Con | D28.2h.Mtb | D28.24h.Con | D28.24h.Mtb | D28.72h.Con | D28.72h.Mtb |
|------------|------------|-------------|-------------|-------------|-------------|------------|------------|-------------|-------------|-------------|-------------|
| 145.0      | 203.3      | 41329.5     | 43336.8     | 41862.8     | 45063.8     | 414.6      | 397.6      | 40572.6     | 41281.1     | 42686.5     | 43484.6     |
| 0.0        | 0.7        | 0.3         | 32.1        | 0.1         | 21.1        | 3.0        | 5.1        | 22.3        | 99.6        | 19.1        | 146.7       |
| 0.1        | 0.3        | 0.1         | 1.9         | 0.0         | 1.7         | 0.6        | 0.8        | 2.1         | 6.5         | 2.1         | 16.9        |
| 0.1        | 0.1        | 0.8         | 1.1         | 2.5         | 3.4         | 0.1        | 0.1        | 1.0         | 1.9         | 2.4         | 5.2         |
| 6.1        | 6.8        | 23.6        | 42.4        | 41.3        | 144.9       | 20.2       | 12.6       | 42.9        | 49.3        | 63.9        | 124.3       |
| 29.2       | 38.1       | 101.2       | 222.1       | 105.3       | 666.2       | 84.3       | 83.5       | 183.2       | 269.8       | 214.8       | 778.6       |
| 0.5        | 1.1        | 8.0         | 92.4        | 40.9        | 631.3       | 5.5        | 4.7        | 25.9        | 104.3       | 99.4        | 727.2       |
| 0.0        | 0.2        | 0.2         | 43.9        | 0.2         | 91.1        | 1.3        | 2.4        | 5.6         | 67.8        | 5.1         | 170.1       |
| 14.5       | 30.7       | 48.4        | 1078.5      | 39.3        | 1424.9      | 78.9       | 85.4       | 552.6       | 1051.9      | 490.6       | 1496.9      |
| 0.0        | 0.0        | 0.1         | 0.1         | 0.5         | 0.1         | 0.0        | 0.1        | 0.0         | 0.1         | 0.1         | 0.2         |
| 1216.9     | 1568.7     | 36168.5     | 165458.3    | 35255.0     | 237620.8    | 4878.0     | 4524.4     | 203371.6    | 259661.4    | 201462.5    | 323519.4    |
| 1.2        | 1.2        | 16.7        | 183.4       | 19.9        | 1836.8      | 4.2        | 3.6        | 244.5       | 6878.0      | 439.4       |             |
| 2.4        | 3.0        | 64.6        | 127.7       | 208.2       | 693.0       | 15.5       | 16.4       | 436.6       | 1014.4      | 826.6       | 4778.9      |
| 0.0        | 1.4        | 10.3        | 24.5        | 8.8         | 39.6        | 4.0        | 4.0        | 49.7        | 58.9        | 37.6        | 88.9        |
| 0.2        | 1.8        | 87.9        | 208.3       | 305.4       | 2190.7      | 8.3        | 8.1        | 1074.2      | 952.7       | 14692.6     | 18761.2     |
| 4.0        | 24.1       | 393.6       | 5874.3      | 25.9        | 6138.7      | 290.8      | 316.8      | 6650.6      | 6815.9      | 5511.8      | 6919.5      |
| 12.5       | 30.0       | 5329.5      | 5493.1      | 4213.8      | 5490.2      | 152.2      | 172.3      | 5429.5      | 5517.0      | 4798.2      | 5526.5      |
| 7.5        | 8.1        | 324.4       | 2701.7      | 413.2       | 7989.0      | 39.1       | 40.3       | 1579.6      | 2149.2      | 1670.4      | 6731.8      |
| 0.1        | 0.0        | 36.0        | 44.5        | 52.0        | 78.9        | 0.0        | 0.5        | 41.5        | 46.9        | 172.5       | 239.3       |
| 11.8       | 9.4        | 1832.6      | 8488.1      | 3713.6      | 13049.7     | 23.5       | 19.8       | 5317.5      | 7033.6      | 4630.2      | 9204.2      |
| 4.4        | 2.9        | 2758.9      | 5413.9      | 3717.4      | 11631.7     | 44.6       | 36.0       | 3931.8      | 5043.5      | 5510.1      | 9256.6      |
| 37.7       | 3707.6     | 2889.5      | 2854.8      | 3529.0      | 3010.1      | 0.0        | 1672.3     | 2993.2      | 2751.3      | 2616.8      | 2611.9      |
| 0.4        | 0.9        | 201.7       | 373.9       | 414.2       | 413.0       | 1.8        | 2.2        | 324.7       | 309.4       | 332.8       | 460.4       |
| 322.1      |            | 1031.0      | 2876.3      | 7999.1      | 22487.7     | 556.6      | 289.5      | 24149.8     | 18005.9     | 82533.9     | 83563.7     |
| 0.1        | 0.1        | 2.2         | 5.8         | 4.2         | 61.0        | 1.2        | 1.1        | 35.1        | 38.7        | 178.6       | 278.4       |
| 115.8      | 158.1      | 102.8       | 516.1       | 36.1        | 424.3       | 302.8      | 270.8      | 462.6       | 1090.7      | 188.7       | 1724.0      |

3.4 3.5 36.1 15.1 77.8 161.7 1.5 1.4 0.5 0.1 3.0 68.0
