# Supplementary material for: Human alveolar macrophage response to Mycobacterium tuberculosis: immune characteristics underlying large inter-individual variability
Source: Research Square preprint supplement (doi:10.21203/rs.3.rs-2986649/v1), 2023-06-08
Supplement: Supplementary file 15 [file f47477a21b9a889444a6128d.pdf]

Additional file 11: Table S8. GO term enrichment for 72h modules. These four modules (blue, yellow, tan red) are significantly correlated with *M.tb* generation times (see Additional file 9: Table S6). Results are from <http://www.webgestalt.org/>.

| Module | geneSet       | description                                     | link                                                                                                                | size | overlap | expect   | enrichmer | pValue   | FDR     | overlapId                              | userid                                                                                                                                                                                                                                                                                                                                                                                                             |
|--------|---------------|-------------------------------------------------|---------------------------------------------------------------------------------------------------------------------|------|---------|----------|-----------|----------|---------|----------------------------------------|--------------------------------------------------------------------------------------------------------------------------------------------------------------------------------------------------------------------------------------------------------------------------------------------------------------------------------------------------------------------------------------------------------------------|
| Blue   | R-HSA-8953854 | Metabolism of RNA                               | <a href="http://reactome.org/PathwayBrowser/#/R-HSA-8953854">http://reactome.org/PathwayBrowser/#/R-HSA-8953854</a> | 674  | 54      | 27.90771 | 1.934949  | 1.87E-06 | 0.00323 | 3,8563;8741;8780;88745;9337;9652       | CNOT8;RPL35A;PPP2CA;RPL8;TPRKB;TRIT1;PSMD1;THO5;RPS21;EXOSC8;RPL39;PAIP1;UBA52;ETF1;RBM28;RAN;TTC37;PSMB8;WDR33;SNRPA;WDR36;RIOK3;CNOT4;T10073;10250;10605;10907;11017;11097;11157;11218;11340;134430;2071;2107;23283;25904;26168;27292;3190;4850;50628;51002;5441;54802;55006;55039;55131;5515;55339;55644;56902;56915;5696;5707;5901;6132;6147;6165;6170;6227;6232;6233;6434;6626;677;7311;7884;80145;81605;8344 |
| Yellow | R-HSA-72203   | Processing of Capped Intron-Containing Pre-mRNA | <a href="http://reactome.org/PathwayBrowser/#/R-HSA-72203">http://reactome.org/PathwayBrowser/#/R-HSA-72203</a>     | 243  | 22      | 7.989483 | 2.75362   | 1.63E-05 | 0.02811 | 29;9589;9688;988                       | 10084;10283;10421;220988;23165;2521;3181;3184;3188;4904;51362;5356;6430;7536;7919;84248;8480;9092;91DC40                                                                                                                                                                                                                                                                                                           |
| Yellow | R-HSA-8953854 | Metabolism of RNA                               | <a href="http://reactome.org/PathwayBrowser/#/R-HSA-8953854">http://reactome.org/PathwayBrowser/#/R-HSA-8953854</a> | 674  | 42      | 22.16013 | 1.895296  | 4.36E-05 | 0.03769 | 129;9491;9589;9688;9861;988            | FYTTD1;RAE1;MTO1;FUS;TRMT61A;SART1;SF1;NUP205;YBX1;NCL;EIF4B;DDX52;HNRNPA3;WTAP;UTP15;CD2BP2;PQB1;HNRNPA2B1;RPS15;10084;10283;10419;10421;11056;11224;115708;1975;220988;23165;2521;25821;3181;3184;3188;4691;4904;51121;51362;5356;5682;5689;5717;6138;6208;6209;6230;6430;7536;7919;80153;83732;84135;84248;8480;9092;93;RPL35;CDC40;RPS14;PSMB1;PSMF1                                                           |
| Tan    | R-HSA-170834  | Signaling by TGF-beta Receptor Complex          | <a href="http://reactome.org/PathwayBrowser/#/R-HSA-170834">http://reactome.org/PathwayBrowser/#/R-HSA-170834</a>   | 73   | 6       | 0.615596 | 9.746652  | 3.28E-05 | 0.03144 | 387;4089;4221;54778;5494;9110          | PPM1A;RHOA;MTMR4;SMA4;MEN1;RNF111                                                                                                                                                                                                                                                                                                                                                                                  |
| Tan    | R-HSA-5696398 | Nucleotide Excision Repair                      | <a href="http://reactome.org/PathwayBrowser/#/R-HSA-5696398">http://reactome.org/PathwayBrowser/#/R-HSA-5696398</a> | 111  | 7       | 0.936043 | 7.478287  | 3.99E-05 | 0.03144 | 10401;10714;1642;29844;54778;6117;8178 | POLD3;PIAS3;RPA1;TFPT;ELL;RNF111;DDB1                                                                                                                                                                                                                                                                                                                                                                              |
| Tan    | R-HSA-73894   | DNA Repair Global Genome Nucleotide             | <a href="http://reactome.org/PathwayBrowser/#/R-HSA-73894">http://reactome.org/PathwayBrowser/#/R-HSA-73894</a>     | 316  | 11      | 2.664772 | 4.127933  | 6.63E-05 | 0.03144 | 0;54778;6117;7374;79184;8178           | UNG;BRCC3;UIMC1;POLD3;PIAS3;RPA1;ASCC3;TFPT;ELL;RNF111;DDB1                                                                                                                                                                                                                                                                                                                                                        |
| Tan    | R-HSA-5696399 | Excision Repair (GG-NER)                        | <a href="http://reactome.org/PathwayBrowser/#/R-HSA-5696399">http://reactome.org/PathwayBrowser/#/R-HSA-5696399</a> | 84   | 6       | 0.708357 | 8.470305  | 7.28E-05 | 0.03144 | 10401;10714;1642;29844;54778;6117      | POLD3;PIAS3;RPA1;TFPT;RNF111;DDB1                                                                                                                                                                                                                                                                                                                                                                                  |
